# Supplementary material for: Lifelong regeneration of cerebellar Purkinje cells after induced cell ablation in zebrafish
Source: eLife. 2023 Apr 12;12:e79672. doi: 10.7554/eLife.79672 (PMC10147380; doi:10.7554/eLife.79672)
Supplement: Figure 1—figure supplement 1—source data 1. [file elife-79672-fig1-figsupp1-data1.xlsx]

## Sheet: Hoja1
				Supplem. Fig. 1A: distance between rostral and caudal PC layer of the corpus cerebelli (µm)
				PC-ablated 1mpt	control 1mpt	PC-ablated 3mpt	control 3mpt	PC-ablated 6mpt	control 6mpt
				147.73	193.42	495.45	409.09	510.61	590.91
				113.64	90.2	367.42	416.67	582.58	456.82
				126.8	174.53	444.7	471.85	516.67	616.67
				109.6	120.17	358.81	505.3	559.09	553.03
				99.15	127.56	550.11	437.25	505.23	590.15
				92.33
