# Supplementary material for: Lifelong regeneration of cerebellar Purkinje cells after induced cell ablation in zebrafish
Source: eLife. 2023 Apr 12;12:e79672. doi: 10.7554/eLife.79672 (PMC10147380; doi:10.7554/eLife.79672)
Supplement: Figure 1—figure supplement 2—source data 1. [file elife-79672-fig1-figsupp2-data1.xlsx]

## Sheet: Sheet1
			Supplem. Fig. 2D	number BrdU cells		(4-OHT=PC-ablated, EtOH=control)
			4-OHT 1dpt	EtOH 1dpt	4-OHT 2dpt	EtOH 2dpt	4-OHT 3dpt	EtOH 3dpt	4-OHT 4dpt	EtOH 4dpt	4-OHT 6dpt	EtOH 6dpt	4-OHT 7dpt	EtOH 7dpt
			89	40	21	21	6	53	139	134	10	95	12	28
			85	110	46	16	9	16	193	81	8	82	20	70
			111	50	28	15	77	40	41	192	7	97	22	25
			181	44	33	47
			92	33	23	42
			127	143
