# Supplementary material for: Lifelong regeneration of cerebellar Purkinje cells after induced cell ablation in zebrafish
Source: eLife. 2023 Apr 12;12:e79672. doi: 10.7554/eLife.79672 (PMC10147380; doi:10.7554/eLife.79672)
Supplement: Figure 1—figure supplement 3—source data 1. [file elife-79672-fig1-figsupp3-data1.xlsx]

## Sheet: Hoja1
			Supplem. Figure 3F-H: EdU / BrdU double incorporation assay
			Number PCs double positive (BrdU+)			Number PCs double positive (BrdU+/EdU+)			Number PCs
			4-OHT PC(BrdU+)	EtOH PC(BrdU+)		4-OHT PC(BrdU+/EdU+)	EtOH PC(BrdU+/EdU+)		4-OHT 1dpt	EtOH 1dpt	4-OHT 18dpt	EtOH 18dpt	4-OHT 26dpt	EtOH 26dpt
			22	18		3	2		49	364	287	554	396	464
			24	24		5	2		34	368	345	503	350	486
			16	25		1	2		38	355	306	456	375	465
			28	26		4	1		51	454	399		347	428
			22	28		4	3		42	361	286		394	508
			20	22		4	2						396
			17			2							337
			36			4							378
