# Supplementary material for: Lifelong regeneration of cerebellar Purkinje cells after induced cell ablation in zebrafish
Source: eLife. 2023 Apr 12;12:e79672. doi: 10.7554/eLife.79672 (PMC10147380; doi:10.7554/eLife.79672)
Supplement: Figure 1—source data 1. [file elife-79672-fig1-data1.xlsx]

## Sheet: Hoja1
		Figure 1C	Number PCs	(4-OHT=PC-ablated, EtOH=control)
		4-OHT 0dpt	EtOH 0dpt	4-OHT 1dpt	EtOH 1dpt	4-OHT 2dpt	EtOH 2dpt	4-OHT 3dpt	EtOH 3dpt	4-OHT 4dpt	EtOH 4dpt	4-OHT 5dpt	EtOH 5dpt	4-OHT 6dpt	EtOH 6dpt	4-OHT 7dpt	EtOH 7dpt	4-OHT 8dpt	EtOH 8dpt	4-OHT 11dpt	EtOH 11dpt
		30	301	2	272	19	318	12	407	14	335	12	357	35	329	64	391	139	460	240	477
		38	310	74	405	10	309	15	394	4	296	33	386	42	444	95	390	74	445	180	476
		47		23	336	7	393	17	423	23	379	27		37	325	87	397	58	426	159	436
		97	252	26	274	26	387	15	311	14	336	38	353	45	408	51		97	350	141	426
		96	290	30	353	14	352		392		421	26	339	37	415	124	411	103	411	275	476
		65		18			283	17	370		419	36	398		457	67	395	120	424	256	404
						11	350														446
																					537
																					464
		Figure 1E, F	Number PCs	(4-OHT=PC-ablated, EtOH=control)
		4-OHT 0dpt	EtOH 0dpt	4-OHT 1dpt	EtOH 1dpt	4-OHT 2dpt	EtOH 2dpt	4-OHT 4dpt	EtOH 4dpt	4-OHT 6dpt	EtOH 6dpt		4-OHT 1mpt	EtOH 1mpt	4-OHT 3mpt	EtOH 3mpt	4-OHT 6mpt	EtOH 6mpt
		69	346	41	386	44	420	124	395	176	379		905	1719	1190	1026	1677	1517
		87	373	59	357	66	379	163	367	178	461		864	966	939	1303	1503	1440
		85	397	42	387	77	356	151	480	184	302		898	1492	1042	1480	1365	1442
		75	316	32	396	78	451	195	401	192	446		1039	864	1134	1368	1542	1297
		72	326	56	311	92	364		337	210	454		778	1345	1618	1665	1305	1368
		74													1567		1357
