# Supplementary material for: Lifelong regeneration of cerebellar Purkinje cells after induced cell ablation in zebrafish
Source: eLife. 2023 Apr 12;12:e79672. doi: 10.7554/eLife.79672 (PMC10147380; doi:10.7554/eLife.79672)
Supplement: Figure 2—figure supplement 1—source data 1. [file elife-79672-fig2-figsupp1-data1.xlsx]

## Sheet: Hoja1
		Supplem. Figure 4A: anti-blbp antibody
			% ptf1a+(GFP) double positive (anti-blbp+) cells			Number cells ptf1a+(GFP)	Number ptf1a+(GFP) double positive (anti-blbp+)
			7.52212			226	17
			8.72483			298	26
			14.4262			305	44
			11.4551			323	37
			9.35829			375	35
