# Supplementary material for: Lifelong regeneration of cerebellar Purkinje cells after induced cell ablation in zebrafish
Source: eLife. 2023 Apr 12;12:e79672. doi: 10.7554/eLife.79672 (PMC10147380; doi:10.7554/eLife.79672)
Supplement: Figure 2—figure supplement 2—source data 1. [file elife-79672-fig2-figsupp2-data1.xlsx]

## Sheet: Sheet1
						Supplem. Fig. 5A	number double positive PC-ptf1a cells (RFP+GFP+)					(4-OHT=PC-ablated, EtOH=control)
						4-OHT 0dpt	EtOH 0dpt	4-OHT 1dpt	EtOH 1dpt	4-OHT 2dpt	EtOH 2dpt	4-OHT 3dpt	EtOH 3dpt	4-OHT 4dpt	EtOH 4dpt	4-OHT 5dpt	EtOH 5dpt	4-OHT 6dpt	EtOH 6dpt	4-OHT 7dpt	EtOH 7dpt	4-OHT 8dpt	EtOH 8dpt	4-OHT 11dpt	EtOH 11dpt	4-OHT 16dpt	EtOH 16dpt	4-OHT 23dpt	EtOH 23dpt
						11	28	1	53	4	29	5	27	2	42	11	41	18	35	14	28	26	22	49	25	70	54	46	30
						5	38	13	57	2	28	3	28	1	30	17	36	9	29	28	22	31	28	29	14	48	26	16	20
						8	32	7	47	3	37	12	33	6	27	13		8	29	12	38	14	23	38	15	37	32	19	15
						4	22	3	39	14	52	7	33	4	45	16	22	10	31	24		29	16	33	16	66	39	9	11
						4		5	35	5	63	9	43		45	15	24	19	36	17	28	27	22	36	18	55	48	14	14
						4		5		5	24		42			10	23	16	40	19	21	31	24	47	25				17
											44														23
																									13
						Supplem. Fig. 5B	number ptf1a cells (GFP+)			(4-OHT=PC-ablated, EtOH=control)
						4-OHT 0dpt	EtOH 0dpt	4-OHT 1dpt	EtOH 1dpt	4-OHT 2dpt	EtOH 2dpt	4-OHT 3dpt	EtOH 3dpt	4-OHT 4dpt	EtOH 4dpt	4-OHT 5dpt	EtOH 5dpt	4-OHT 6dpt	EtOH 6dpt	4-OHT 7dpt	EtOH 7dpt	4-OHT 8dpt	EtOH 8dpt	4-OHT 11dpt	EtOH 11dpt	4-OHT 16dpt	EtOH 16dpt	4-OHT 23dpt	EtOH 23dpt
						288	330	261	312	220	204	201	238	121	283	286	361	176	186	148	197	242	280	325	289	456	363	531	421
						177	361	327	289	202	262	197	210	176	254	244	380	195	254	236	275	195	279	310	353	616	276	381	458
						242	265	256	343	183	295	246	254	194	276	294	295	252	195	222	283	165	264	299	291	423	468	464	489
						153	192	144	220	292	380	236	248		350	243	272	209	278	217	330	178	259	292	319	478	614
						129		215	249	346	343	292	328			195	283	248	324	280	344	205	309	289	260	474	762
						160		190		201			295					195	330	177		260	344	299	237
																									293
