# Supplementary material for: Lifelong regeneration of cerebellar Purkinje cells after induced cell ablation in zebrafish
Source: eLife. 2023 Apr 12;12:e79672. doi: 10.7554/eLife.79672 (PMC10147380; doi:10.7554/eLife.79672)
Supplement: Figure 2—source data 1. [file elife-79672-fig2-data1.xlsx]

## Sheet: Hoja1
			Figure 2B	Number GFAP+ cells	(4-OHT=PC-ablated, EtOH=control)
			4-OHT 0dpt	EtOH 0dpt	4-OHT 1dpt	EtOH 1dpt	4-OHT 2dpt	EtOH 2dpt	4-OHT 3dpt	EtOH 3dpt	4-OHT 4dpt	EtOH 4dpt	4-OHT 5dpt	EtOH 5dpt	4-OHT 6dpt	EtOH 6dpt	4-OHT 7dpt	EtOH 7dpt	4-OHT 8dpt	EtOH 8dpt
			76	57	78	60	46	56	54	57	119	71	100	91	67	76	52	58	63	96
			80	51	87	86	40	57	51	74	89	80	82	97	69	57	51	50	75	104
			96	94	65	77	58	47	38	61	95	100	108	66	47	59	122	38	77	91
			116	88	81	98	93	105	154	122	105	84	59	61	69	63	70	87	42	69
			127	139	130	113	147	144	98	130	109	90	89	95	59	92		125	39	51
							132					97							53	52
				PCs/ptf1a+ cells
			Figure 2G	%PCs (RFP+-GFP+)	(4-OHT=PC-ablated, EtOH=control)
			4-OHT 0dpt	EtOH 0dpt	4-OHT 1dpt	EtOH 1dpt	4-OHT 2dpt	EtOH 2dpt	4-OHT 3dpt	EtOH 3dpt	4-OHT 4dpt	EtOH 4dpt	4-OHT 5dpt	EtOH 5dpt	4-OHT 6dpt	EtOH 6dpt	4-OHT 7dpt	EtOH 7dpt	4-OHT 8dpt	EtOH 8dpt	4-OHT 11dpt	EtOH 11dpt	4-OHT 16dpt	EtOH 16dpt	4-OHT 23dpt	EtOH 23dpt
			36.6667	9.30232	50	19.4853	21.0526	9.1195	41.6667	6.63391	14.2857	13.4328	91.6667	11.4846	51.4286	10.6383	21.875	7.16113	18.705	4.78261	20.4167	3.36135	17.8571	9.94475	7.65391	4.23729
			13.1579	12.2581	17.5676	14.0741	20	9.06149	20	7.1066	25	11.0818	51.5151	9.32643	21.4286	6.53153	29.4737	5.64103	41.8919	6.29214	16.1111	4.45545	9.87654	4.60177	3.50877	3.23102
			17.0213	12.6984	30.4348	13.9881	42.8571	9.41476	70.5882	7.80142	26.087	8.92857	48.1482	6.23229	21.6216	8.92308	13.7931	9.57179	24.1379	5.39906	23.8994	5.60538	7.74059	5.71429	4.08602	5.22135
			4.12371	7.58621	11.5385	14.2336	53.8462	13.4367	46.6667	10.6109	28.5714	6.4133	42.1053	7.07965	22.2222	7.59804	47.0588	6.81265	29.8969	4.57143	23.4043	4.28305	16.5829	6.17089	5.042	4.3312
			4.16667		16.6667	9.91501	35.7143	17.8977	52.9412	10.9694		10.7399	57.6923	5.77889	51.3513	8.6747	13.7097	5.31646	26.2136	5.3528	13.0909	2.80172	12.6147	6.69456
			6.15385		27.7778		45.4545	8.48057		11.3514			27.7778		47.0588	8.75273	28.3582		25.8333	5.66038	18.3594
								12.5714
