# Supplementary material for: Lifelong regeneration of cerebellar Purkinje cells after induced cell ablation in zebrafish
Source: eLife. 2023 Apr 12;12:e79672. doi: 10.7554/eLife.79672 (PMC10147380; doi:10.7554/eLife.79672)
Supplement: Figure 3—figure supplement 1—source data 1. — Quantification of PC numbers for Figure 3—figure supplement 1D, E. Average firing frequency determination of PCs for Figure 3—figure supplement 1E, highest burst frequency numbers of PCs for Figure 3—figure supplement 1F, and dataset of complex spike to simple spike firing ratios of PCs for Figure 3—figure supplement 1G. [file elife-79672-fig3-figsupp1-data1.xlsx]

## Sheet: Data-Sets Suppl. Fig2
Reference Data-Set
Average Frequency - Suppl. Fig. 6A
	4 dpf	5 dpf	6 dpf	7 dpf	8 dpf	9 dpf	11 dpf	21 dpf
1st replicate	3.06	3.65	5.35	8.23	8.6	4.81
	2.86	1.11	2.98	10.04	9.2	8.905
	1.2	3.61	4.02	5.29	10.69	7.18
	1.26	3.24	1.85	14.475	13.77	9.98
	2.56	2.12	1.74	3.17	10.7	6.37
	4.88	1.97	2.47	5.745	5.77	10.83
	1.275	0.83	3.44	6.135	7.32	9.5
	1.605		6.75	5.43	9.19	8.05
	3.6		9.48	5.37	6.385	6.84
	3.44		7.82	3.44	11.345	7.33
	3.99		6.57	12.09	8.22	7.97
	2.51		3.915			5.67
	2.84		3.73			13.98
	1.58		3.21			5.27
2nd replicate	3.55	1.55	7.81	6.71	13.42		7.08	14.25
	3.62	5.15	7.17	6.26	13.54		7.47	14.7
	3.46	4.01	6.12	6.97	7.96		5.45	7.28
	3.61	2.07	4.06	5.62	5.2		5.02	7.43
	4.61	3.58	2.14	4.55	13.74		9.77	13.01
	4.06	3.09	4.11	7.51	13.11		10.19	8.81
	2.34	4.51	9.42	8.9	9.47		9.96	12.14
	2.86	4.38	8.99	8.77	7.96		12.97	7.16
	4.14	3.68	4.87	3.89	7.07		5.49	12.08
	3.26	3.35	4.45	3.42	7.46		8.8	11.44
	0.82	6.7	5.24	9.01	6.86		9.18	8.51
	2.07	3.12	5.47	7.58	5.38		9.91	8.37
	1.33	3.64	5.02	8.6	9.25		7.84	9.54
		3.14	6.56	11.16	7.77		12.9	8.18
		3	6.86	6.41			13.07	5.28
		3.03	5.24	4.49				8.4
			4.79	3.02
Average	2.82926	3.24043	5.21435	6.86732	9.1752	8.04893	9.00667	9.78625
SD	1.12974	1.30554	2.14812	2.81871	2.70691	2.46374	2.66595	2.78311
SE	0.217418	0.272223	0.385813	0.532686	0.541382	0.658463	0.688346	0.695778
n	27	23	31	28	25	14	15	16
Highest Frequency - Suppl. Fig. 6B
	4 dpf	5 dpf	6 dpf	7 dpf	8 dpf	9 dpf	11 dpf	21 dpf
1st replicate	15	17	18	22	29	32
	25	18	13	21	32	34
	11	12	15	26	53	21
	26	20	19	21	67	55
	28	26	29	55	31	43
	23	19	28	37	52	30
	8		58	28	37	64
	8		55	66	61	52
	25		36	26	14	48
	6		10	38	17	44
	23		18	28	8	32
	28		22	47	9	33
	27		17	19	50	34
	23		25	59	33	21
	28		17	44	54	10
	23			25	48	36
						18
2nd replicate	12	6	22	17	68		38	28
	14	7	17	29	29		34	27
	10	15	17	32	24		23	38
	12	11	17	19	25		11	24
	13	12	18	13	20		19	20
	19	13	19	25	45		47	51
	16	38	22	58	48		23	37
	9	45	24	18	38		24	42
	9	49	40	21	40		36	18
	25	52	29	15	25		37	19
	21	17	32	18	19		38	26
	18	13	21	15	14		16	26
	19	36	43	70	13		27	22
	8	22	41	60	34		42	28
	23	17	47	16	22		25
	24	30	25	32	68		42
	6	5	19	25	58
		6	17	28	22
		12	19	22	22
		9	25		20
			65		17
					19
					16
					17
Average	17.7273	20.2692	26.6389	31.2857	32.95	35.7059	30.125	29
SD	7.39625	13.4805	13.2883	16.0139	17.4752	14.1234	10.4936	9.59968
SE	1.28752	2.64375	2.21472	2.70685	2.76307	3.42543	2.62341	2.56562
n	33	26	36	35	40	17	16	14
Cs/ss Ratio - Suppl. Fig. 6C
	4 dpf	5 dpf	6 dpf	7 dpf	8 dpf	9 dpf	11 dpf	21 dpf
1st replicate	0.357	0.137072	0.0335196	0.0554529	0.0322997	0.0833333
	0.055	0.37037	0.118252	0.0329218	0.0386534	0.0240848
	0.175	0.0840841	0.215	0.0821918	0.0611303	0.0242511
	0.071	0.178182	0.21256	0.0698795	0.0247593	0.0341969
	0.0622407	0.145946	0.0705394	0.0245734	0.0300097	0.0670017
	0.026738	0.163743	0.0813954	0.0234949	0.0314607	0.0747922
	0.0335051	0.137072	0.0621242	0.0309811	0.014218	0.0211982
	0.157895	0.37037	0.0249017	0.0523139	0.0918919	0.0259067
	0.490566	0.0840841	0.0945559	0.0564202	0.0382979	0.0532468
	0.0731707	0.178182	0.0769231	0.0356083	0.0325843	0.0526316
	0.295455	0.145946	0.0808081	0.0519878	0.0239833	0.0506912
	0.0327635	0.163743		0.0144928	0.024839	0.0338505
	0.0632184			0.030303		0.048718
	0.100629					0.04
	0.179191					0.0272905
	0.157025
	0.0555556
	0.0960699
	0.183333
	0.224806
2nd replicate	0.0338028	0.15625	0.0409731	0.0223547	0.0134128		0.0142388	0.0280702
	0.0520231	0.084788	0.0390516	0.0167598	0.0132939		0.0169622	0.022449
	0.0854701	0.164251	0.0375817	0.0444763	0.0301508		0.0243478	0.070055
	0.0629371	0.135338	0.029321	0.0703297	0.0181951		0.0567742	0.0619112
	0.128834	0.0465632	0.0364963	0.0516854	0.0200634		0.0340909	0.0238278
	0.0700483	0.0662101	0.044586	0.0565553	0.0197287		0.046841	0.0317821
	0.142857	0.0746269	0.0378198	0.0426667	0.0276382		0.0201816	0.0362438
	0.108992	0.125	0.0503356	0.0621532	0.03207		0.0398406	0.0684358
	0.0864198	0.0741758	0.0472441	0.0448549	0.0947955		0.0379845	0.0149007
		0.0561056	0.073922	0.0534884	0.0758836			0.0227273
			0.0614035	0.0286738	0.0335135			0.0458284
			0.0426829	0.0436817	0.05148			0.037037
			0.0647182					0.0134474
								0.0170455
								0.0178571
Average	0.12626	0.142823	0.0698631	0.043932	0.0364314	0.0440796	0.0323624	0.0341079
SD	0.105658	0.0846048	0.0498165	0.0177285	0.0228315	0.0196024	0.0144669	0.0191947
SE	0.0196202	0.0180378	0.0101688	0.0035457	0.00466047	0.00506131	0.00482229	0.00495605
n	29	22	24	25	24	15	9	15
Purkinje-cell Ablation - Suppl. Fig. 6D - Cell numbers
Control																4-OHT
	0 dpt	1 dpt	2 dpt	3 dpt	4 dpt	5 dpt	6 dpt	7 dpt	8 dpt	10 dpt	14 dpt	21 dpt					0 dpt	1 dpt	2 dpt	3 dpt	4 dpt	5 dpt	6 dpt	7 dpt	8 dpt	10 dpt	14 dpt	21 dpt
1st replicate	295	322	321	311	292	363	336	384	382	404	398	1026				1st replicate	72	48	21	26	20	32	29	78	147	145	230	754
	300	280	347	313	344	321	323	368	322	386	422	1340					42	36	33	18	31	25	29	68	99	183	248	622
	274	294	305	348	333	326	340	332	362	382	412	1326					80	38	23	26	22	38	61	68	91	136	258	842
	289	302	315	332	294	327	348	356	336	346	477	1114					81	44	28	22	25	31	43	75	115	187	182	778
					339			366																				602
2nd replicate	292	304		336		320	342	386	386	426	518	708				2nd replicate	66	20		10		20	34	61	93	142	206	562
	266	289		302		318	340	372	366	412	468	696					49	26		13		22	33	55	61	129	180	504
	268	313		323		332	320	362	452	454	474	764					68	33		12		32	37	42	60	117	238	506
	279	301		287		336	338	352	402	432	542	742								16		27	57	53		132		532
	291			308						394		662								9		23	40					494
				315								690
Average	283.778	300.625	322	317.5	320.4	330.375	335.875	364.222	376	404	463.875	906.8				Average	65.4286	35	26.25	16.8889	24.5	27.7778	40.3333	62.5	95.1429	146.375	220.286	619.6
n	9	8	4	10	5	8	8	9	8	9	8	10				n	7	7	4	9	4	9	9	8	7	8	7	10
SD	12.3468	13.2443	17.9258	17.7717	25.3239	14.5301	9.56836	16.5965	40.3556	31.8277	50.8624	270.59				SD	14.8533	9.74679	5.37742	6.54684	4.79583	5.86894	11.5866	12.1067	30.3339	25.3317	31.3354	127.352
SE	4.11561	4.68256	8.96289	5.61991	11.3252	5.13718	3.38293	5.53217	14.2678	10.6092	17.9826	85.568				SE	5.614	3.68394	2.68871	2.18228	2.39792	1.95631	3.86221	4.28035	11.4651	8.95612	11.8437	40.2722
EC investigations after PC-Ablation - Suppl. Fig. 9A
Control									4-OHT
	Average	SE (±)	n				Average	SE (±)	n
1 dpt	452	22.6421	4			1 dpt	21.3333	4.46219	6
4 dpt	496.8	13.7346	5			4 dpt	37	5.05305	6
7 dpt	598	31.087	5			7 dpt	66.3333	7.01269	6
14 dpt	1151.67	45.6929	6			14 dpt	551	16.1307	6
				n=4-6					n=6
Average frequency - Fig 3C and Suppl. Fig 6E
												4-OHT
	Control											3 dpt	4dpt	5dpt	6dpt	7dpt	8 dpt	10 dpt	14 dpt	21 dpt
	3 dpt	4dpt	5dpt	6dpt	7dpt	8 dpt	10 dpt	14 dpt	21 dpt		1st replicate	0	0	4.27	4.74286	9.2	18.875	7.16667	6.9	19.3091
1st replicate	7.38	10.5	2.90769	10.7812	12.96	7.2	16.8	9.19	7.53333			0	5.5	4.56	3.79	9.62	10.35	2.32	8.82	12.2545
	4.97	7.69	4.97	4.97	5.37778	4.92	7.69	2.4	17.6625			0	0	4.13514	7.66	7.3	5.14	10.83	7.92308	12.75
	4.66	6.59375	3.54	5.15	9.28	10.4667	6.96	14.9	11.45			4.6	0.657143	1.44	7.92	5.37	7.7	9.88	4.09	12.3
	5.79	10.18	7.98305	9.16	5.05	6	11.12	10.5	13.8889			0	0	0.380952	1.36364	5.58	3.25	8.89	4.93	10.6364
	20.6	11.2	9.97895	6.73	4.87	6.39394	5.83	5.41	16.3111			0.55	0	5.07	4.51	8.05	1.09	12.93	7.13	20.5
	5.32	7	4.4	10.99	12.7667	8.18	13.53	9.81818	13.5286			0.18	1.4	3.06	5.64444	12.5	3.54	3.67	9.08	11.7684
	8.44706	4.97778	11.75	14.775	2.46	9.09091	1.85	7.2	14.0222			0.74	6.87	0	0.23	2.84	9.16	0.46	6.93	8.92857
		19.9333	10.32	18.4615	9.41	6.18	6.55	3.66	11.56			9.86	0	9.19	0.65	3.99	10.5	3.475	9.53	22.05
		6.91429	5.84	6.55	7.28		4.43	7.65714	6.15714			0	4.09412	2.57778	0.52	5.3	7.51	2.43	7.19149	15.78
		7.66071	14.2	1.25	8.1			7.21111	8.16			0	0	9	9	3.24	4.62	14.2	6.56	3.7027
		6.84906	6.36		4.2807			8.28	15.8526				7.97826	3.66	2.93	4.2	3.66667	13.68	3.68	5.30667
			7.47619					11.4667	4.06				0	0.65	0.87	4.4	1.43	10.98	4.98	16.4
								5.81	12.2889				0	0.386364	5.15	1.21	0.46	7.3	4.07
								10.02	5.89				1.28	7.30667	4.12	3.6	5.85714	7.45	3.22
								4.94					2.02	0.25	8.62	2.92	0.39	8.48387	8.67
								5.18					0	1.5	0.67	3.7	2.81	6.45714	8.23
													0	5.44286	0.74	6.06	2.48	6.83	7.99
													0	0.883333	2.24	2.96	3.54	9.02	6.37
2nd replicate	10.0364	15.06	8.64	10.4487	10.4	8.87	8.86364	15.86	8.23						1.46	1.55	9.4		4.2
	11.7812	14.2	12.98	9.68	13.07	8.71	11.14	8.67	9.63333						0.461538	1.63			9.24
	12.98	9.42	4.72727	8.8	6.96471	8.5	11.8	11.46	12.26							2.38
	5.82	7.74	4.42	8.63	5.29	8.9	8.075	11.7143	7.61							4.91
	7.33333	10.62	8.54	9.64	8.6375	6.52	13.96	9.5	11.925							2.01
	5	10.22	7.54	6.21	15.25	5.06	5.79	8.26	7.17143
	12.2	12.52	7.26	7.33	4.11	6.75294	7.29	17.8909	9.67
	10.46	4.58	10.16	7.65	2.5	6.51667	7.39	4.64	7.08		2nd replicate	0	0	7.23	7.86	5.75	5.93	6.10667	5.82857	18.7778
	5.2	3.64	3.65	7.14		8.44	1.88	12.95	8.75294			0	0	10.8111	3	5.28	2.37	10.56	9.3	4.63333
	6.25	3.18	17.43	7.20635		9.22		11.15	7.24615			0	0	3.88	4.05	6.06	8.35	6.91	13.5222	9.11111
	6.05		15.8286	7.56				4.91	13.2903			0.47	3.37349	3.72	0.22	2.35	5.84	5.36	12.29	7.88
	4.21								7.94444			6.88	0	5.63	4.3	0.63	3.94	7.93333	9.14444	8.59
	6								8.32			2.84	0.17	8.96	3.5	6.84	5.35	9.47	9.6	9.3
									18.88			0.44	0	5.26	4.62105	1.47	4.33	7.13	10.08	7.85455
												0	0	12.5	3.58	1.19	6.15	6.6	11.97	11.2889
Average	8.0244	9.07995	8.30008	8.52918	7.79249	7.55117	8.38604	8.9129	10.585			0.0142857	3.1	4.46	3.45	1.37	3.59	7.56	9.16	10.4933
SD	4.01273	4.06516	4.03908	3.54929	3.79174	1.57726	4.03963	3.80313	3.81737			3.78462	0.133333	0	0.85	6.02857	4.09	7.82	9.4	11.43
SE	0.897274	0.88709	0.842206	0.774519	0.869885	0.371763	0.952151	0.731913	0.721416			0.32	0	0.12	7.35	9.9375	2.4186	7.89	6.81	13.7222
n	20	21	23	21	19	18	18	27	28			0	1.25	0.5	7.3125	6.03529	2.52	10.62	6.47	10.01
													1.06	0	5.98	6.26		6.51111	9.92	13.57
													0.47	0.32	4.9	3.825		14.6154	8.36	8.83333
													0	0.18	6.05769	6.53		7.57778	7.74	8.52
													2.64	0	2.96	11.6		2.81	7.06	7.48
														1.11667	3.01	3.76		2.90278	7.43	13.9
														0.44	2.62			3.96	7.11	15.8111
														2.71	0.47					10.9412
														1.52	0.906667					18.902
														1.86957	5.58					15.3222
														4.46667	1.52					12.07
														4.63077	3.54					10
															2.13333					12.22
											Average	1.33387	1.1999	3.43066	3.62364	4.8643	5.20773	7.53486	7.71615	11.9553
											SD	2.59878	2.07573	3.28146	2.5391	2.8916	3.72293	3.41472	2.3453	4.36091
											SE	0.541884	0.350863	0.50634	0.378507	0.451593	0.658127	0.561376	0.375548	0.71693
											n	23	35	42	45	41	32	37	39	37
	Highest Frequency - Figure 3D and Suppl. Fig. 6F
	Control											4-OHT
	3 dpt	4dpt	5dpt	6dpt	7dpt	8 dpt	10 dpt	14 dpt	21 dpt			3 dpt	4dpt	5dpt	6dpt	7dpt	8 dpt	10 dpt	14 dpt	21 dpt
1st replicate	26	17	6	18	21	19	18		12		1st replicate	0	0	16	18	34	29	16	21	34
	18	13	15	18	40	12	11	32	22			0	11	13	13	23	28	11	26	23
	16	23	62	14	55	22	12	8	14			0	0	16	34	36	13	58	26	43
	17	72	29	29	19	21	44	23	18			10	5	8	43	20	19	29	14	16
	31	31	20	34	47	17	38	21	20			0	0	3	11	17	11	29	20	16
	77	10	11	42	40	25	44	19	18			9	0	29	26	38	6	37	19	34
	27	18	36	51	25	18	8	26	20			0	8	14	61	45	16	51	57	18
	37	55	23	53	6	40	26	25	9			2	18	0	2	19	36	31	63	31
	46	21	34	14	22	25	30	15	17			7	0	44	7	26	42	35	35	18
	11	29	79		17	17		12	12			20	32	13	7	34	42	4	17	23
	10	22	26		35			18	19				0	31	20	15	38	20	24	27
	17		9		27			25	7				16	16	9	26	29	28	19	21
			35					13	25				0	2	4	32	20	28	14	42
								40	13				0	2	22	32	2	18	8	10
								13	15				18	24	25	11	12	26	6	22
								27					33	2.5	34	26	5	23	27
													0	6	4	45	6	29	18
													0	14	6	37	8	23	6
2nd replicate	18	38	22	21	16	18	12	22	15					4	20	44	20	25	27
	34	34	56	22	37	28	16	13	16						16	9	13	32	15
	27	21	14	19	15	21	15	17	19						4	18			39
	21	21	21	26	23	38	58	15	13							33			30
	27	33	25	56	19	49	19	15	18							11			46
	33	31	47	11	39	25	12	13	13							55			40
	81	25	18	45	31	18	15	21	16							50			15
	98	30	37	42		25	23	11	15
	33	57	33	24		24	16	36	13		2nd replicate	0	0	33	35	23	26	21	12	27
	20	40	20	18		32		38	14			0	0	28	16	34	24	19	19	18
	15	48	11	15		25		20	26			0	0	18	23	41	23	11	22	24
	28	29	14	30		25			27			0	0	28	6	26	33	13	23	16
	23			18					19			4	24	28	32	4	25	14	18	16
	30								14			33	0	56	22	30	51	23	24	31
									32			31	2	34	43	26	39	15	24	21
									22			3	0	48	31	13	44	14	19	22
												0	0	41	26	10	18	18	15	28
												1	11	0	13	22	14	18	17	34
												47	1	3	48	16	9	30	15	25
												3	0	14	11	35	5	23	16	23
													5	0	17	15		21	33	46
													5	8	45	22		41	14	37
Average	31.5769	31.2174	28.12	28.1818	28.1053	24.7273	23.1667	20.6923	17.1935				4	2	39	18		37	27	44
SD	21.7204	15.0513	17.669	13.9647	12.5561	8.58671	14.1182	8.56864	5.38776				0	0	17	32		11	20	31
SE	4.25971	3.13841	3.5338	2.97729	2.88056	1.83069	3.32769	1.68045	0.96767				57	10	36	47		61	36	45
n	26	23	25	22	19	22	18	26	31					5	20	19		30	30	24
														16	4					27
														9	20					22
														5	20					31
														21	35					36
														16	13					21
																				26
																				31
											Average	7.72727	7.14286	16.2024	21.7727	27.186	22.0625	25.6053	23.6279	27.1
											SD	13.1192	12.6704	14.3344	13.9848	12.211	13.3463	12.4608	12.0258	8.96374
											SE	2.79702	2.14168	2.21185	2.10829	1.86215	2.35932	2.02141	1.83392	1.41729
											n	22	35	42	44	43	32	38	43	40
	Cs/Ss Ratio - Figure 3E and Suppl. Fig. 6G
	control											4-OHT
	3 dpt	4dpt	5dpt	6dpt	7dpt	8 dpt	10 dpt	14 dpt	21 dpt			3 dpt	4dpt	5dpt	6dpt	7dpt	8 dpt	10 dpt	14 dpt	21 dpt
1st replicate	0.0453258	0.0468594	0.0384615	0.0237389	0.0196696	0.0393701	0.0108303	0.0245262	0		1st replicate	0	0	0.0465686	0.0524496	0.0222222	0.00908848	0.0141509	0.0267857	0
	0.0397489	0.065097	0.0665236	0.0688172	0.034188	0.0718954	0.0363881	0.0859729	0			0	0	0	0	0.0344086	0.0197044	0.0131004	0.0243902	0.00574498
	0.0378619	0.0138382	0.0630631	0.0383064	0	0.0194805	0.00578035	0	0			0	0	0.113051	0.0624133	0.0656934	0.0259481	0.0314286	0.0716887	0
	1e-05	0.0251762	0.0266065	0.0663562	0.0907127	0.0452962	0.0267775	0.0105871	0			0	1.55556	0.180328	0.0790191	0.114108	0.0158311	0.0443975	0.087766	0
	0.0279441	0.0351202	1e-05	0.10509	0.0993228	0.0770016	0.106262	0.0207547	0			0	0	0.581028	1.5	0.155279	0	0.0672269	0.0931264	0
	0.037037	0.0327869	0.0401891	0.0261438	0	0	0.0296804	0.0207939	0			0	0	0	1e-05	0.0481771	0.238636	0.0149137	0	0
	0.0107693	0	0.0190807	0.012333	0.194175	0.0635065	0.217105	0.00840336	0			0	0.206897	0	0.0561331	0.0347682	0.026087	0.118902	0.0133929	0.00282849
		0.00656455	0.0217822	0.00727476	0.0228261	0.0673575	0.0598706	0	0.00123732			0.5	0.0520674	0	0.916667	0.100775	0.0223214	0.393939	0.0468278	0
		0	0.093633	0.0564516	0.0196078		0.0752427	0	0			0.213115	0	0.0325843	0.3	0.10221	0.0174419	0.0490566	0.0358696	0
		0.0190024	0.0150107	1e-05	0.0201511			0	0			0.00921187	0	0	0.333333	0.023166	0.074392	0	0.0336391	0
		0.0196629	0.0111288		0			0	0				0	0.0332951	0.039261	0.0872483	0.0382023	0.00637845	0.0429253	0
			0.0260767					0.0100671	0				0.0426136	0.133127	0.0353357	0.0535117	0.129363	0.0148368	0.0656371	0
								0.0192982	0.00490641				0	0	0.225352	0.042654	1e-05	0.0329257	0.00809717	0
								0.0193286	0				0	0.214286	0.0177866	0.234694	0.4375	0.0751105	0	0
								1e-05					0	0.00967296	0.0248756	0.00278552	0	0.0376045	0.141844	0
								0.0401606					0.0860215	0.666667	0.010551	0.0174216	0	0.0478088	0
													0	0.415094	0.522727	0.00543478	0.161157	0.102439	0.0619355
2nd replicate	0.0534351	0.00566572	0.034263	0.0189474	0.0267086	0.0356718	0.0127273	0.00813953	0.0321429				0	0.0244689	0.37037	0.0341297	0.0290456	0.0133531	0.0322997
	0.0236978	0.0501672	0.04	0.0328639	0.059034	0.00950119	0.0154905	0.00880282	0.020816					0	0.0135747	0.116981	0.0231214	0.0403691	0
	0.0450886	0.105495	0.133333	0.0310633	0.0454546	0.0421546	0.0199435	0.0156057	0.0339674						0.106061	0.260163	0		0.157025
	0.0294627	0.0631868	0.0276775	0.0299145	0.0282738	0.0848586	0.0108617	0.0160428	0.0302376						0.428571	0.13986			0.0297177
	0.0570824	0.0152964	0.0182328	0.08	0.0112732	0.0284553	0.0175747	0.0122549	0.0421424							0.19598
	0.0517241	0.00788955	0.016	0.065407	0.0844327	0.0123457	0.0340425	0.00408163	0.0168244							0.0627706
	0.046	0.0203749		0.00665188	0.0683761	0.0155844	0.0193103	0.00869565	0.0205761							0.148571
	0.0547667	0.062645		0.016129		0.0107784		0.0294118	0.0150862
	0.038206					0.01766		0.0229358	0.00733496
	0.034188							0.0446809	0.0185185
	0.0822622								0.00726392		2nd replicate	0	0	0.0242866	0.121495	0.0492701	0.0102215	0.0251819	0.0408163	0.0203774
	0.0434783								0.033954			0	0	0.0484914	0.0331633	0.0688259	0.0772727	0.0114942	0.0496614	0.0373134
												0	0	0.172205	0.294118	0.0594406	0.0308642	0.0206795	0.0219162	0.0212978
												0	0	0.0420168	0.0189574	0.169154	0	0.0268199	0.00244698	0.0207254
												0.236842	0.0141469	0.0368324	0.0416667	0.75	0.0808824	0.0218978	0.0246514	0
												0.0377074	0	0.0491803	0.1026	0.0379363	0.161017	0.0860092	0.0446137	0.0175055
												0.198312	0	0.0233463	0.136508	0.204918	0.0199005	0.0127841	0.0212766	0.0285714
												0.571429	0	0.023751	0.0849057	0	1e-05	0.1	0.0109797	0.00793651
												0	0.0299003	0.0799032	0.888889	0.036855	0.0965147	0.123328	0.0189099	0.00510856
Average	0.0398994	0.0313067	0.0383929	0.0380833	0.0457892	0.037701	0.043618	0.0165598	0.0109618			0	0.333333	0	0.0263158	0.0142894	0.0833333	0.034076	0.0217391	0.0187166
SD	0.017861	0.0279306	0.0327319	0.0291693	0.0484588	0.0267629	0.0535804	0.0185943	0.0137816			0.0123457	0	0.714286	0.0629067	0.0325048		0.00663507	0.0396947	0.00808097
SE	0.00409759	0.00640772	0.00771499	0.00687527	0.0114218	0.00649096	0.0133951	0.00364663	0.0027028			0.142857	0.25	0.136364	0.0227273	0.0793103		0.0244755	0.0352	0.0172764
n	19	19	18	18	18	17	16	26	26			0	0.204545	0	0.0882353	0.0515464		0.0021097	0.0620985	0.00444115
													0.305556	0.454545	0.135849	0.017134		0.0224888	0.10582	0.00378788
													0	0.8	0.110169	0.0419162		0.128514	0.107296	0.0070922
													0	0	0.566667	0.170124		0.142076	0.0321637	0.00268097
														0.313725	0.446809			0.00507614	0.0108843	0
														0.375	0.0588235				0.0502216	0.00444695
														0.106122	0.169231					0.0333333
														0.0857143	0.0959752					0.011318
														0	0.267327					0.012556
														0.0578947						0.0117351
														0.0415225
											Average	0.0835574	0.0906069	0.143699	0.211139	0.097156	0.0609289	0.0530997	0.0429066	0.00818581
											SD	0.162209	0.275531	0.214409	0.300538	0.125295	0.0923061	0.0708104	0.0377844	0.0103067
											SE	0.0338228	0.0472531	0.033084	0.0463741	0.0198109	0.0168527	0.0118017	0.00605035	0.00169442
											n	23	34	42	42	40	30	36	39	37
