# Supplementary material for: Lifelong regeneration of cerebellar Purkinje cells after induced cell ablation in zebrafish
Source: eLife. 2023 Apr 12;12:e79672. doi: 10.7554/eLife.79672 (PMC10147380; doi:10.7554/eLife.79672)
Supplement: Figure 3—figure supplement 2—source data 1. [file elife-79672-fig3-figsupp2-data1.xlsx]

## Sheet: Overview
	PC numbers after repeated 4-OHT treatment (Supl. Fig. 7A)
	control										4-OHT
	0 dpt	3 dpt	7 dpt	10 dpt	3 dpst	7 dpst	10 dpst				0 dpt	3 dpt	7 dpt	10 dpt	3 dpst	7 dpst	10 dpst
	352	402	434	538	604	802	1432				132	36	154	262	17	360	790
	372	418	458	520	612	962	1056				70	38	74	236	10	170	840
	356	468	484	450	558	674	1016				100	34	94	264	52	122	776
	374	426	476	600	520	750	1374				108	48	108	274	78	198	648
	310	448		552	692	618	1086				156	36	156	270		302
Average	352.8	432.4	463	532	597.2	761.2	1192.8			Average	113.2	38.4	117.2	261.2	39.25	230.4	763.5
SD	25.7915	25.8998	22.1811	54.6077	64.7086	132.496	194.569			SD	32.6067	5.54977	36.5677	14.8728	31.7004	97.9428	81.7537
SE	11.5343	11.5827	11.0905	24.4213	28.9386	59.254	87.014			SE	14.5822	2.48193	16.3536	6.65132	15.8502	43.8014	40.8768
n	5	5	4	5	5	5	5			n	5	5	5	5	4	5	4
	Average Frequency (Supl. Fig. 7B and B')
	control											4-OHT
	3 dpt	7 dpt	10 dpt	3dpdt	7 dpdt	10 dpdt						3 dpt	7 dpt	10 dpt	3dpdt	7 dpdt	10 dpdt
	12.1667	16.7875	10.4667	11.2	7.35	8.45						13.2667	6.56471	16.7	5.73333	7.73333	12.5
	6.8	10.8941	16.2222	8.6125	3.7625	5.15						1.06	5.90769	9.23077	0	3.12195	9.86667
	8.08889	22.7647	4.825	4.19	4.03333	4.93333						0.0666667	5.68675	10	0.06	7	10.3467
	2.63333	3.24444	5	4.91	9.3125	14.1						1.68	3.04444	2.12195	0	11.13	2.325
	7.85714	3.07692	4.60976	5.31111	20	1.58667						1.21	20.2333	16.3393	1.98182	4.29825	1.93333
	2.68333	3.22222	15.73	3.78889	11.2125	1.725						5.45	2.77	6.925	2.05	3.81111	2.31429
	5	2.63333	4.32222	4.825	3.3	17.85						0.0222222	3.63	5.6375	0.4875	1.12	6.9
	13.0333	3.975	2.25556	4.5875	3.65	18.1882						0.29	1.7	4.75556	1.55556	1.85714	6.13953
	2.51765	13.8	3.375	3.1	5.2	1.225						1.07	1.32	6.29231	0.48	2.86667	4.93
	6.40385	4.4	12.5	3.69	3.64	3.15714						2.65	10.9176	5.93333	0.766667	4.2	5.86667
	9.86538	3.78889	12.2195	6.66	9.16	10.0923						0	1.76667	8.26	1.42	3.0875	5.23
	12.2941	12.0667	10.9368	13.99	11.4	9.41667						1.425	1.72727	6.7625	0.9		3.06024
	7.5125	8.4875	7.36986	9.06	6.93	9.39474						0.34	14.8	3.65	0	11.5667	10.7333
	3.88	12.6444	7.37	5.0875	6.82857	14.9677						0.04	3.21311	7.18889	0.2	1.38571	11.08
	3.61111	5.6	7.3	7.73684	8.96154	20.3286						0	5.16667	10.3684	0.314286	6.9	22.6667
	2.98889	7.43529	7.66	14.4	12.4848	22.7692						0.173333	4.65625	4.10606	1.95238	5	4.325
	4.48571	5.48235	7.93	5.675	6.025	5.6625						1.91429	5.8	3.47692	3.74	3.63529	19.5333
	5.07407	6.61538	12.2619	9.87778	3.44444	3.75						0.95	6.09231	23.8	1.7375	4.73	18.6667
	4.3	12.8824	6.41	8.0625	13.375	2.97143						0.24	4.65	22.8	2.72222		10.4
	2.97143	15.8429	15.8491	5.59259	4.01818	3.01538						0.125	7.35	7.8	2.76087	6.09	5.58571
	4.35714	8.77647	6.4	3.6	5.37143	4						0.67	4.54286	2.86154	3.0875		10
	3.90769	5.15556	12.86	8.74444	6.7619	5.0125						2.97	5.23333	9.16923	2.12	2.13	5.92
	16.95	4.9	7.67143	6.9	5.29	11.6923						0.62	4.35294	5.19444	1.18293	8.9375	16.7778
	23.5333	5.225	2.55294	5.10638	6.6	11.15						0.12	9.06667	8.18889	0.82	5.72973	5.17647
	22.12	3.12308	9.11	14.2875	3.72308	2.86154						0.3	5.125	3.925	2.1375	3.5	5.66667
	4.09474	9.6	7.85294	4.18182		3.07273						0.12	6	4.21053	2.2	2.52	2.14286
	3.6	4.95385		14.6889								0.2	1.43182	4.06667	0	5.125	8.33333
	11.1714	7.90909		12.9875								0.7	3.95	14.7	0	1.12
	6.38667	4.87778		6.475									4.53571		3
	4.82222	7.6375		4.79									3.28		1.85
													1.575		1.375
													1.47692		3.41667
															8.08
															1.57333
Average	7.50369	7.92674	8.50234	7.40396	7.27339	8.32781									3.13333
SD	5.53044	4.88485	4.06431	3.6303	4.01413	6.33294									2.8375
SE	1.00972	0.923149	0.797077	0.662799	0.802826	1.24199									2.91667
n	30	28	26	30	25	26									1.12
															2.2
															0.742857
											Average	1.34547	5.23647	8.37374	1.81639	4.74383	8.46001
											SD	2.6233	3.98199	5.65677	1.62989	2.86707	5.59105
											SE	0.495758	0.703922	1.06903	0.257708	0.573415	1.076
	Highest Frequency (Supl. Fig. 7C and C')										n	28	32	28	40	25	27
	control											4-OHT
	3 dpt	7 dpt	10 dpt	3dpdt	7 dpdt	10 dpdt						3 dpt	7 dpt	10 dpt	3dpdt	7 dpdt	10 dpdt
	19	26	19	17	18	14						35	16	32	10	23	20
	16	24	31	17	10	10						20	15	18	0	16	17
	15	44	12	12	15	13						1	13	22	1	37	30
	14	16	13	16	28	21						22	10	7	0	43	14
	32	9	9	31	43	9						17	43	36	13	22	19
	14	13	47	24	37	9						41	16	22	7	23	14
	13	11	16	20	10	32						1	22	20	5	10	58
	54	23	10	28	12	32						8	17	16	27	11	32
	10	20	33	21	13	7						22	9	25	4	8	35
	38	20	26	16	23	15						8	30	17	7	25	39
	55	26	27	25	27	23						0	10	28	19	25	51
	65	16	25	16	26	22						25	6	35	27	28	32
	39	19	21	42	29	23						1	37	25	0	9	31
	24	38	18	44	24	29						1	10	28	1	19	40
	39	16	15	29	19	38						0	24	39	1	15	24
	28	28	21	38	32	40						12	20	25	9	28	35
	29	19	40	26	18	19						7	27	21	27	24	43
	19	27	42	32	20	13						4	22	29	13	41	31
	33	23	21	35	8	16						1	12	34	29	22	38
	25	25	39	27	31	16						1	14	33	37	25	26
	10	17	43	18	16	11						3	15	29	27	20	24
	8	29	55	22	19	17						36	17	26	30	12	42
	30	14	33	46	36	26						5	8	17	17	13	30
	42	27	22	14	29	41						1	2	33	18	29	20
	45	20	19	16	39	18						2	12	10	23	14	24
	31	26		22	20	12						0	13	20	30		34
	36	28		12								4	14	17	0
	68	34		31								5	14	31	0
	58	22		41									17		13
	47	26		16									15		11
				22									9		7
													6		8
															16
															10
Average	31.8667	22.8667	26.28	25.0323	23.1538	20.2308									14
SD	16.9151	7.6777	12.4148	9.7928	9.56114	9.90478									11
SE	3.08825	1.42571	2.48296	1.75884	1.87509	1.94249									23
n	30	29	25	31	26	26									8
															23
															6
											Average	10.1071	16.0938	24.8214	13.3	21.68	30.8846
											SD	12.2424	8.74868	7.97242	10.4371	9.46802	10.8897
											SE	2.3136	1.54656	1.50665	1.65025	1.8936	2.13565
											n	28	32	28	40	25	26
	CS/SS Ratio (Supl. Fig. 7D and D')
	control											4-OHT
	3 dpt	7 dpt	10 dpt	3dpdt	7 dpdt	10 dpdt						3 dpt	7 dpt	10 dpt	3dpdt	7 dpdt	10 dpdt
	0.0136986	0.0208488	0.0305732	0.0357143	0.0238095	0.035503						0.150754	0.046595	0.0179641	0.0755814	0.121739	0.032
	0.0359477	0.0280778	0.0191781	0.0435414	0.119601	0.00970874						0.0660377	0.0625	0.0416667	0	0.25	0.0405405
	0.0494505	0.00671835	0.0440415	0.100239	0.0743802	0.10473						0	0.0402542	0.0361111	0.165138	0.0619048	0.0270619
	0.0949367	0.0582192	0.0466667	0.166667	0.0241611	0.0177305						0.119048	0.20073	0.229885	0.121951	0.0467206	0.182796
	0.0181818	0.065	0.042328	0.089613	0.026875	0.193277						0.289256	0.021966	0.0229508	0.242857	0.126531	0.144828
	0.0621118	0.110345	0.0114431	0.161088	0.0479376	0.181159						0	0.151625	0.0469314	0.125	0.145773	0.117284
	0.072	0.0843882	0.0231362	0.0469208	0.216981	0.0246499						0	0.179063	0.0443459	0.108696	0.232143	0.0471014
	0.044757	0.238994	0.0541872	0.0699482	0.0735931	0.0116429						0.310345	0.329412	0.0233645	0.056338	0.339744	0.0189394
	0.088785	0.0241546	0.148148	0.0435967	0.0821918	0.255102						0.124528	0.393939	0.0122249	0.111111	0.383721	0.00608519
	0.105105	0.138636	0.032	0.183871	0.0890688	0.0678733						0	0.0269397	0.0454545	0.2	0.22619	0.0070922
	0.0584795	0.246334	0.0199601	0.111111	0.10989	0.035061						0	0.0943396	0.0217918	0.272727	0.137652	0.0152964
	0.0411483	0.038674	0.039461	0.048048	0.0218341	0						0.294118	0.578947	0.012939	0.317073	0.0648415	0.0472441
	0.0216306	0.0279823	0.0687732	0.0400286	0.0120614	0						0.5	0.0405405	0.0410959	0.0534759	0.0652174	0
	0.0515464	0.0931459	0.00678426	0.0640177	0.018759	0						0	0.0510204	0.0231839	0.0215827	0.088	0.00722022
	0.2	0.185268	0.0136986	0.0761671	0.0251046	0						0.156716	0.0989247	0.00304569	0.0734694	0.12945	0.00882353
	0.152416	0.162975	0.0143603	0.0353741	0.0171674	0.00202703						0.189474	0.0771812	0.0184502	0.0551181	0.0887949	0
	0.0732484	0.160944	0.0542245	0.00925926	0.0242718	0.00883002						0	0.0127796	0.0221239	0.445344	0.0738916	0.0204778
	0.0827251	0.24186	0.0300971	0.0792952	0.0414938	0.01						0.4	0.0580808	0.00840336	0.0141509	0	0.0178571
	0.0645995	0.0273973	0.0171607	0.0697413	0.0537634	0.0384615						0.104478	0.0698925	0	0	0.0699301	0.0512821
	0.0528846	0.0405771	0.025	0.0387597	0.0121495	0.00510204						0.154882	0.0544218	0.121212	0	0.0943396	0.117647
	0	0.077748	0.101562	0.0662252	0.081448	0						0	0.176101	0.0369128	0	0.238095	0.08
	0	0.133621	0.029549	0.114583	0.0930851	0							0.154989	0.1341	0.0681818	0.31746	0.182432
	0.141593	0.0379009	0.0726257	0.0635324	0.0528169	0.0210526							0.135135	0.125	0.226667	0.121951	0
	0	0.126794	0.253456	0.0289855	0.0226843	0							0.110294	0.135294	0.108108	0.419643	0.0681818
	0	0.17734	0.0482986	0.0541667	0.00757576	0							0.0390244	0.0775401	0.245455		0.0588235
	0.0539846	0.0515351	0.0224719	0.0201225	0.00826446	0							0.0833333	0.0407056	0.0643564		0.04
	0.0916667	0.0714286		0.108696									0.238095	0.197452	0.627119		0.024
	0.0217391	0.150573		0.0128593									0.162025	0.1175	0.148936
	0.091858	0.062069		0.0115496									0.110236	0.237705	0.105727
	0.168203	0.0615034		0.0250965									0.134146	0.047619	0.171429
				0.0480167									0.357143
													0.260417
Average	0.0650899	0.0983684	0.0488148	0.0666721	0.0531142	0.0393043
SD	0.0509762	0.0707242	0.0518699	0.0450581	0.0472849	0.0682448
SE	0.00930693	0.0131331	0.0101725	0.00809267	0.00927334	0.0133839
n	30	29	26	31	26	26
											Average	0.136173	0.14219	0.0647658	0.140853	0.160155	0.050482
											SD	0.148191	0.126849	0.066646	0.139944	0.114247	0.0537705
											SE	0.032338	0.0224239	0.0121678	0.0255501	0.0233206	0.0103481
											n	21	32	30	30	24	27
		0 dpt	352	372	356	374	310									132	70	100	108	156
		3 dpt	402	418	468	426	448									36	38	34	48	36
		7 dpt	434	458	484		476									154	74	94	108	156
		10 dpt	538	520	450	600	552									262	236	264	274	270
		3 dpst	604	612	558	520	692									17	10	52	78
		7 dpst	802	962	674	750	618									360	170	122	198	302	346
		10 dpst	1432	1056	1016	1374	1086											790	840	776	648

## Sheet: 3 dpt
	3 dpt
	control												4-OHT
		Series number	Duration in seconds	Number of spikes	Average spike frequency per second	Highest spike frequency per second	Complex spikes	cs/ss ratio						Series number	Duration in seconds	Number of spikes	Average spike frequency per second	Highest spike frequency per second	Complex spikes
	3	3	90	1095	12.1667	19	15	0.0136986					20	20	100	199	13.2667	35	30	0.150754	nachgezählt
	4	4	90	612	6.8	16	22	0.0359477					21	21	100	106	1.06	20	7	0.0660377
	7	7	90	728	8.08889	15	36	0.0494505					23	23	45	3	0.0666667	1	0	0
	8	8	60	158	2.63333	14	15	0.0949367					24	24	100	168	1.68	22	20	0.119048
	9	9	70	550	7.85714	32	10	0.0181818					25	25	100	121	1.21	17	35	0.289256
	10	10	60	161	2.68333	14	10	0.0621118					26	26	60	327	5.45	41		0	sehr rauschig
	13	13	50	250	5	13	18	0.072	nachgezählt				27	27	90	2	0.0222222	1	0	0
	16	16	60	782	13.0333	54	35	0.044757					28	28	100	29	0.29	8	9	0.310345
	17	17	85	214	2.51765	10	19	0.088785					29	29	100	107	1.07	22	47		nachgezählt
	18	18	52	333	6.40385	38	35	0.105105					30	30	100	265	2.65	8	33	0.124528	nachgezählt
	20	20	52	513	9.86538	55	30	0.0584795					31	31	40	0	0	0	0	0	stumm
	21	21	85	1045	12.2941	65	43	0.0411483					32	32	80	114	1.425	25		0	relativ rauschig
	23	23	80	601	7.5125	39	13	0.0216306					33	33	50	17	0.34	1	5	0.294118
	25	25	50	194	3.88	24	10	0.0515464					37	37	50	2	0.04	1	1	0.5
	27	27	90	325	3.61111	39	65	0.2					38	38	50	0	0	0	0	0	stumm
	34	34	58	136			14						39	39	75	13	0.173333	12	6		nachgezählt
	35	35	90	269	2.98889	28	41	0.152416					40	40	70	134	1.91429	7	21	0.156716	nachgezählt
	36	36	70	314	4.48571	29	23	0.0732484					41	41	100	95	0.95	4	18	0.189474	nachgezählt
	40	40	81	411	5.07407	19	34	0.0827251					42	42	50	12	0.24	1	0	0	nachgezählt
	44	44	90	387	4.3	33	25	0.0645995					46	46	40	5	0.125	1	2	0.4	nachgezählt
	45	45	70	208	2.97143	25	11	0.0528846					47	47	100	67	0.67	3	7	0.104478	nachgezählt
	47	47	42	183	4.35714	10	0	0	nachgezählt				48	48	100	297	2.97	36	46	0.154882	nachgezählt
	52	55	65	254	3.90769	8	0	0	nachgezählt				49	49	100	62	0.62	5	47		nachgezählt
	62	62	20	339	16.95	30	48	0.141593	nachgezählt				50	50	50	6	0.12	1	2		nachgezählt
	63	63	15	353	23.5333	42		0	nachgezählt				51	51	40	12	0.3	2	8		nachgezählt
	70	70	70	140	100 Hz (grob überschlagen)								52	52	50	6	0.12	0	2		nachgezählt
	71	71	100	2212	22.12	45		0	nachgezählt				54	54	55	10	0.2	4	0	0	nachgezählt
	5	5	95	389	4.09474	31	21	0.0539846					55	55	100	70	0.7	5	70		nachgezählt
	14
	15	15	100	360	3.6	36	33	0.0916667									1.34547	10.1071		0.136173
	16	16	70	782	11.1714	68	17	0.0217391
	18	18	75	479	6.38667	58	44	0.091858
	19	19	90	434	4.82222	47	73	0.168203
					7.50369	31.8667		0.0650899

## Sheet: 7 dpt
	control										4-OHT
		Series number	Duration in seconds	Number of spikes	Average spike frequency per second	Highest spike frequency per second	complex spikes	cs/ss ratio				Series number	Duration in seconds	Number of spikes	Average spike frequency per second	Highest spike frequency per second	complex spikes	cs/ss ratio
	2	2	80	1343	16.7875	26	28	0.0208488			2	2	85	558	6.56471	16	26	0.046595
	3	3	85	926	10.8941	24	26	0.0280778			3	3	65	384	5.90769	15	24	0.0625
	4	4	85	1935	22.7647	44	13	0.00671835			4	4	83	472	5.68675	13	19	0.0402542
	5	5	90	292	3.24444	16	17	0.0582192			5	5	90	274	3.04444	10	55	0.20073
	6	6	65	200	3.07692	9	13	0.065			6	6	90	1821	20.2333	43	40	0.021966
	9	9	90	290	3.22222	13	32	0.110345			7	7	100	277	2.77	16	42	0.151625
	13	13	75	47							8	8	100	363	3.63	22	65	0.179063
	14	14	90	237	2.63333	11	20	0.0843882			9	9	100	170	1.7	17	56	0.329412
	16	16	40	159	3.975	23	38	0.238994			10	10	100	132	1.32	9	52	0.393939
	18	18	70	207	13.8	20	5	0.0241546			19	19	85	928	10.9176	30	25	0.0269397
	21	21	100	440	4.4	20	61	0.138636			24	24	90	159	1.76667	10	15	0.0943396
	22	22	90	341	3.78889	26	84	0.246334			25	25	55	95	1.72727	6	55	0.578947
	25	25	100	181	12.0667	16	7	0.038674			29	29	75	222	14.8	37	9	0.0405405
	28	28	80	679	8.4875	19	19	0.0279823			30	30	61	196	3.21311	10	10	0.0510204
	29	29	90	1138	12.6444	38	106	0.0931459			31	31	90	465	5.16667	24	46	0.0989247
	30	30	80	448	5.6	16	83	0.185268			32	32	64	298	4.65625	20	23	0.0771812
	31	31	85	632	7.43529	28	103	0.162975			34	34	90	626	5.8	27	8	0.0127796
	32	32	85	466	5.48235	19	75	0.160944			36	36	65	396	6.09231	22	23	0.0580808
	33	33	65	430	6.61538	27	104	0.24186			43	43	40	186	4.65	12	13	0.0698925
	47	47	17	219	12.8824	23	6	0.0273973			44	44	62	147	7.35	14	8	0.0544218
	48	48	70	1109	15.8429	25	45	0.0405771			45	45	70	318	4.54286	15	56	0.176101
	49	49	85	746	8.77647	17	58	0.077748			47	47	90	471	5.23333	17	73	0.154989
	51	51	90	464	5.15556	29	62	0.133621			28	28	35	74	4.35294	8	10	0.135135
	53	53	70	343	4.9	14	13	0.0379009			52	52	45	136	9.06667	2	15	0.110294
	54	54	80	418	5.225	27	53	0.126794			53	53	40	205	5.125	12	8	0.0390244
	56	56	65	203	3.12308	20	36	0.17734			54	54	90	540	6	13	45	0.0833333
	57	57	95	912	9.6	26	47	0.0515351			55	55	44	63	1.43182	14	15	0.238095
	58	58	98	228							56	56	100	395	3.95	14	64	0.162025
	62	62	65	322	4.95385	28	23	0.0714286			57	57	84	381	4.53571	17	42	0.110236
	67	67	50	27							58	58	75	246	3.28	15	33	0.134146
	68	68	80	611	7.6375	34	92	0.150573			60	60	80	126	1.575	9	45	0.357143
	72	72	85	237							61	61	65	96	1.47692	6	25	0.260417
	79	79	55	435	7.90909	22	27	0.062069							5.23647	16.0938
	80	80	90	439	4.87778	26	27	0.0615034
					7.92674	22.8667

## Sheet: 10 dpt
	control									4-OHT
		Series number	Duration in seconds	Number of spikes	Average spike frequency per second	Highest spike frequency per second	complex spikes	cs/ss ratio			Series number	Duration in seconds	Number of spikes	Average spike frequency per second	Highest spike frequency per second	complex spikes	cs/ss ratio
	1	1	75	785	10.4667	19	24	0.0305732		58	58	40	167	16.7	32	3	0.0179641	counted
	3	3	90	1460	16.2222	31	28	0.0191781		59	59	12	120	9.23077	18	5	0.0416667	counted
	4	4	80	386	4.825	12	17	0.0440415		67	67	36	360	10	22	13	0.0361111
	5	5	90	450	5	13	21	0.0466667		68	68	41	87	2.12195	7	20	0.229885
	6	6	41	189	4.60976	9	8	0.042328		82	82	40	116			nur cs?
	9	9	100	1573	15.73	47	18	0.0114431		84	84	56	915	16.3393	36	21	0.0229508
	12	12	90	389	4.32222	16	9	0.0231362		85	85	40	277	6.925	22	13	0.0469314
	14	14	100	167			nur cs?			88	88	80	451	5.6375	20	20	0.0443459
	17	17	90	203	2.25556	10	11	0.0541872		89	89	90	428	4.75556	16	10	0.0233645
	18	18	75	105			nur cs?			91	91	65	409	6.29231	25	5	0.0122249
	19	19	80	270	3.375	33	40	0.148148		92	92	60	176	5.93333	17	8	0.0454545	counted
	21	21	40	500	12.5	26	16	0.032		93	93	100	826	8.26	28	18	0.0217918
	26	26	41	501	12.2195	27	10	0.0199601		94	94	80	541	6.7625	35	7	0.012939
	27	27	95	1039	10.9368	25	41	0.039461		95	95	100	365	3.65	25	15	0.0410959
	28	28	73	538	7.36986	21	37	0.0687732		96	96	90	647	7.18889	28	15	0.0231839
	29	29	100	737	7.37	18	5	0.00678426		98	98	95	985	10.3684	39	3	0.00304569
	32	32	50	365	7.3	15	5	0.0136986		100	100	66	271	4.10606	25	5	0.0184502
	35	35	100	766	7.66	21	11	0.0143603		102	102	65	226	3.47692	21	5	0.0221239
	36	36	100	793	7.93	40	43	0.0542245	nachzhälen	103	103	100	238	23.8	29	2	0.00840336	counted
	37	37	84	1030	12.2619	42	31	0.0300971		108	108	65	505	22.8	34	auch hier		counted
	38	38	100	641	6.41	21	11	0.0171607		109	109	80	624	7.8	33	0	0
	39	39	53	840	15.8491	39	21	0.025		115	115	65	99	2.86154	29	12	0.121212	counted
	40	40	80	512	6.4	43	52	0.101562		117	117	65	596	9.16923	26	22	0.0369128
	44	44	100	1286	12.86	55	38	0.029549		119	119	100	261			35	0.1341	fish damaged?
	45	45	70	537	7.67143	33	39	0.0726257		120	120	26	56			7	0.125
	47	47	85	217	2.55294	22	55	0.253456		125	125	75	170			23	0.135294
	49	49	100	911	9.11	111	44	0.0482986		133	133	72	374	5.19444	17	29	0.0775401
	52	52	100	182			37 nu7r cs?			135	135	90	737	8.18889	33	30	0.0407056
	54	54	68	534	7.85294	19	12	0.0224719		137	137	80	314	3.925	10	62	0.197452
					8.50234	29.5385		0.0488148		140	140	95	400	4.21053	20	47	0.1175
										142	142	90	366	4.06667	17	87	0.237705
										147	147	40	147	14.7	31	7	0.047619	counted
														8.37374	24.8214		0.0647658

## Sheet: 3 dpst
	control
			Series number	Duration in seconds	Number of spikes	Average spike frequency per second	Highest spike frequency per second	cs	ratio cs/ss				Series number	Duration in seconds	Number of spikes	Average spike frequency per second	Highest spike frequency per second	cs	ratio cs/ss
		2	2	25	224	11.2	17	8	0.0357143			77	77	30	172	5.73333	10	13	0.0755814
		3	3	80	689	8.6125	17	30	0.0435414			78	78	70	0	0	0	0
		4	4	100	419	4.19	12	42	0.100239			80	80	50	3	0.06	1	0	0
		5	5	85	204	2.4	16	34	0.166667			82	82	55	0	0	0	0
		6	6	100	491	4.91	31	44	0.089613			84	84	55	109	1.98182	13	18	0.165138
		7	7	90	478	5.31111	24	77	0.161088			85	85	60	123	2.05	7	15	0.121951
		8	8	90	341	3.78889	20	16	0.0469208			87	87	80	39	0.4875	5	34	0.871795
		10	10	80	386	4.825	28	27	0.0699482			89	89	90	140	1.55556	27	34	0.242857
		12	12	80	367	4.5875	21	16	0.0435967			90	90	100	48	0.48	4	6	0.125
		15	15	100	310	3.1	16	57	0.183871			91	91	60	46	0.766667	7	5	0.108696
		16	16	100	369	3.69	25	41	0.111111			92	92	100	142	1.42	19	8	0.056338
		19	19	50	333	6.66	16	16	0.048048			93	93	100	90	0.9	27	10	0.111111
		20	20	100	1399	13.99	42	56	0.0400286			94	94	65	0	0	0	0
		21	21	100	906	9.06	44	58	0.0640177			97	97	25	5	0.2	1	1	0.2
		22	22	80	407	5.0875	29	31	0.0761671			98	98	35	11	0.314286	1	3	0.272727
		23	23	95	735	7.73684	38	26	0.0353741			99	99	42	82	1.95238	9	26	0.317073
		35	35	15	216	14.4	26	2	0.00925926			100	100	50	187	3.74	27	10	0.0534759
		36	36	80	454	5.675	32	36	0.0792952			101	101	80	139	1.7375	13	3	0.0215827
		38	38	90	889	9.87778	35	62	0.0697413			102	102	90	245	2.72222	29	18	0.0734694
		44	44	80	645	8.0625	27	25	0.0387597			103	103	46	127	2.76087	37	7	0.0551181
		50	50	27	151	5.59259	18	10	0.0662252			104	104	80	247	3.0875	27	110	0.445344
		52	52	80	288	3.6	22	33	0.114583			105	105	100	212	2.12	30	3	0.0141509
		56	56	90	787	8.74444	46	50	0.0635324			106	106	82	97	1.18293	17	0	0
		64	64	20	138	6.9	14	4	0.0289855			108	108	100	82	0.82	18	0	0
		65	65	47	240	5.10638	16	13	0.0541667			109	109	80	171	2.1375	23	0	0
		66	66	80	1143	14.2875	22	23	0.0201225			110	110	100	220	2.2	30	15	0.0681818
		67	67	22	92	4.18182	12	10	0.108696			111	111	55	0	0	0	0
		68	68	90	1322	14.6889	31	17	0.0128593			112	112	50	0	0	0	0
		70	70	80	1039	12.9875	41	12	0.0115496			114	114	50	150	3	13	34	0.226667
		71	71	80	518	6.475	16	13	0.0250965			115	115	50	74	1.85	11	8	0.108108
		73	73	100	479	4.79	22	23	0.0480167			117	117	80	110	1.375	7	27	0.245455
						7.24254	25.0323		0.0666721			119	119	12	41	3.41667	8	36	0.878049
												120	120	25	202	8.08	16	13	0.0643564
												121	121	75	118	1.57333	10	74	0.627119
												122	122	60	188	3.13333	14	28	0.148936
												123	123	80	227	2.8375	11	24	0.105727
												124	124	60	175	2.91667	23	30	0.171429
												125	125	75	84	1.12	8	80	0.952381
												126	126	60	132	2.2	23	105	0.795455
												127	127	70	52	0.742857	6	33	0.634615
																1.81639	13.3		0.238797

## Sheet: 7 dpdt
	control
		Series number	Duration in seconds	Number of spikes	Average spike frequency per second	Highest spike frequency per second	cs	cs/ss ratio				Series number	Duration in seconds	Number of spikes	Average spike frequency per second	Highest spike frequency per second	cs	cs/ss ratio
	3	3	80	588	7.35	18	14	0.0238095			75	75	60	115	7.73333	23	14	0.121739	counted
	5	5	80	236							76	76	41	128	3.12195	16	32	0.25
	6	6	80	301	3.7625	10	36	0.119601			77	77	60	420	7	37	26	0.0619048
	7	7	65	113							78	78	100	1113	11.13	43	52	0.0467206
	8	8	60	242	4.03333	15	18	0.0743802			79	79	57	245	4.29825	22	31	0.126531
	10	10	80	745	9.3125	28	18	0.0241611			80	80	90	343	3.81111	23	50	0.145773
	13	13	80	1600	20	43	43	0.026875			81	81	100	112	1.12	10	26	0.232143
	15	15	80	124							83	83	84	156	1.85714	11	53	0.339744
	18	18	80	897	11.2125	37	43	0.0479376			84	84	60	86	2.86667	8	33	0.383721
	19	19	65	106	1.63077	10	23	0.216981			85	85	65	84	4.2	25	19	0.22619
	22	22	70	231	3.3	12	17	0.0735931			86	86	80	247	3.0875	25	34	0.137652
	23	23	60	219	3.65	13	18	0.0821918
	24	24	95	494	5.2	23	44	0.0890688			92	92	60	694	11.5667	28	45	0.0648415
	26	26	75	273	3.64	27	30	0.10989			93	93	70	97	1.38571	9	78	0.804124
	30	30	25	229	9.16	26	5	0.0218341			99	99	28	138	6.9	19	9	0.0652174
	31	31	80	912	11.4	29	11	0.0120614			100	100	75	125	5	15	11	0.088
	33	33	100	693	6.93	24	13	0.018759			103	103	85	309	3.63529	28	40	0.12945
	36	36	70	478	6.82857	19	12	0.0251046			104	104	100	473	4.73	24	42	0.0887949
	38	38	52	466	8.96154	32	8	0.0171674			105	105	100	99					schlecht gesealt
	46	46	33	412	12.4848	18	10	0.0242718			107	107	100	609	6.09	41	45	0.0738916
	47	47	80	482	6.025	20	20	0.0414938			110	110	80	2
	48	48	27	93	3.44444	8	5	0.0537634			113	113	100	213	2.13	22		0
	51	51	80	1070	13.375	31	13	0.0121495			117	117	16	143	8.9375	25	10	0.0699301
	52	52	55	221	4.01818	16	18	0.081448			118	118	37	212	5.72973	20	20	0.0943396
	53	53	70	376	5.37143	19	35	0.0930851			126	126	42	147	3.5	12	35	0.238095
	56	56	80	223							127	127	75	189	2.52	13	60	0.31746
											128	128	48	246	5.125	29	30	0.121951
	63	63	42	284	6.7619	36	15	0.0528169			130	130	100	112	1.12	14	47	0.419643
	64	64	100	529	5.29	29	12	0.0226843							4.74383	21.68	35.0833	0.185914
	65	65	100	660	6.6	39	5	0.00757576
	66	66	100	338
	68	68	65	242	3.72308	20	2	0.00826446
					7.05637	23.1538	18.7692	0.0531142

## Sheet: 10 dpdt
		control										4-OHT
			Series number	Duration in seconds	Number of spikes	Average spike frequency per second	Highest spike frequency per second	cs	cs/ss ratio				Series number	Duration in seconds	Number of spikes	Average spike frequency per second	Highest spike frequency per second	cs	cs/ss ratio
		3	3	20	169	8.45	14	6	0.035503			1	1	30	125	12.5	20	4	0.032
		5	5	20	103	5.15	10	1	0.00970874			2	2	49	148	9.86667	17	6	0.0405405
		6	6	60	296	4.93333	13	31	0.10473			3	3	75	776	10.3467	30	21	0.0270619
		7	7	60	846	14.1	21	15	0.0177305			5	5	80	186	2.325	14	34	0.182796
		9	9	75	119	1.58667	9	23	0.193277			6	6
		10	10	80	138	1.725	9	25	0.181159			10	10	75	145	1.93333	19	21	0.144828
		13	13	100	1785	17.85	32	44	0.0246499			13	13	70	162	2.31429	14	19	0.117284
		15	15	85	1546	18.1882	32	18	0.0116429			24	24	80	552	6.9	58	26	0.0471014
		16	16	80	98	1.225	7	25	0.255102			25	25	43	264	6.13953	32	5	0.0189394
		18	18	70	221	3.15714	15	15	0.0678733			27	27	100	493	4.93	35	3	0.00608519
		19	19	80								28	28	70	282	5.86667	39	2	0.0070922
		28	28	65	656	10.0923	23	23	0.035061			32	32	100	523	5.23	51	8	0.0152964
		33	33	12	113	9.41667	22	0	0			39	39	83	254	3.06024	32	12	0.0472441
		34	34	38	357	9.39474	23	0	0			51	51	60	227	10.7333	31	0	0
		41	41	31	464	14.9677	29	0	0			54	54	70	277	11.08	40	2	0.00722022
		42	42	70	1423	20.3286	38	0	0			55	55	100	340	22.6667		3	0.00882353
		43	43	65	1480	22.7692	40	3	0.00202703			58	58	80	346	4.325	24	0	0
		44	44	80	453	5.6625	19	4	0.00883002			61	61	70	293	19.5333	35	6	0.0204778
		45	45	80	300	3.75	13	3	0.01			62	62	95	280	18.6667	43	5	0.0178571
		46	46	70	208	2.97143	16	8	0.0384615			63	63	75	156	10.4	31	8	0.0512821
		47	47	65	196	3.01538	16	1	0.00510204			64	64	70	391	5.58571	38	46	0.117647
		48	48	26	104	4	11	0	0			66	66
		49	49	80	401	5.0125	17	0	0			67	67
		50	50	65	760	11.6923	26	16	0.0210526			70	70	80	150	10	26	12	0.08
		55	55	40	446	11.15	41	0	0			71	71	100	592	5.92	24	108	0.182432
		56	56	60								57	57	100	302	16.7778	42	0	0
		57	57	65	186	2.86154	18	0	0			79	79	85	440	5.17647	30	30	0.0681818
		58	58	55	169	3.07273	12	0	0			83	83	90	85	5.66667	20	5	0.0588235
						8.32781	20.2308		0.0393043			84	84	70	150	2.14286	24	6	0.04
												85	85
												86	86
												88	88
												90	90	60	250	8.33333	34	6	0.024
																8.46001	30.8846		0.050482
