# Supplementary material for: Lifelong regeneration of cerebellar Purkinje cells after induced cell ablation in zebrafish
Source: eLife. 2023 Apr 12;12:e79672. doi: 10.7554/eLife.79672 (PMC10147380; doi:10.7554/eLife.79672)
Supplement: Figure 3—figure supplement 3—source data 1. [file elife-79672-fig3-figsupp3-data1.xlsx]

## Sheet: Hoja1
					Supplem. Figure 8B: olig2+ cells 15dpt after PC ablation
					Number Olig2+(GFP) expressing cells
					PC-ablated 15dpt	control 15dpt
					155	186
					151	99
					116	171
					150	195
					214	100
						158
