# Supplementary material for: Lifelong regeneration of cerebellar Purkinje cells after induced cell ablation in zebrafish
Source: eLife. 2023 Apr 12;12:e79672. doi: 10.7554/eLife.79672 (PMC10147380; doi:10.7554/eLife.79672)
Supplement: Figure 3—figure supplement 4—source data 1. [file elife-79672-fig3-figsupp4-data1.xlsx]

## Sheet: Tabelle1
	PC numbers after ablation (Supl. Fig. 9A)
	Control								4-OHT
	1 dpt	4 dpt	7 dpt	14 dpt					1 dpt	4 dpt	7 dpt	14 dpt
	462	462	508	1298					10	26	66	504
	416	514	676	1132					16	28	98	552
	512	490	548	970					12	36	54	546
	418	478	610	1232					22	56	50	560
		540	648	1162					30	48	60	524
				1116					38	28	70	620
Average	452	496.8	598	1151.67				Average	21.3333	37	66.3333	551
SD	45.2843	30.7116	69.5126	111.924				SD	10.9301	12.3774	17.1775	39.512
SE	22.6421	13.7346	31.087	45.6929				SE	4.46219	5.05305	7.01269	16.1307
n	4	5	5	6				n	6	6	6	6
	Eurydendroid Activity after PC-Ablation
	Average Frequency - Fig. 3H and Supl. Fig. 9B
	Control										4-OHT
	cell #	0 dpt	1 dpt	2 dpt	3 dpt	7 dpt	10 dpt	14 dpt			cell #	0 dpt	1 dpt	2 dpt	3 dpt	7 dpt	10 dpt	14 dpt
	1	3.47368	7.64	4.78	3.8	6.8125	4.45614	9.7625			1	3.87368	6.92632	2.84	16.1333	5.33333	3.375	7.24
	2	2.91892	4.85	1.2381	4.8875	5.8	5.32	15.6714			2	2.36	6.26	3.69	3.6	20.0308	2.16	6.89
	3	3.91489	4.97	4.86	6.22	8.34568	8.56667	2.98667			3	2.12	1.925	3.94545	11.53	6.37778	4.42	7.54737
	4	1.23158	0.75	0.4	5.4	4.95	9.82857	3.65263			4	3.93	6.25333	3.83	6.2	16.1412	5.73077	3.68421
	5	1.62	3.64	0.62	0.75	4.82	14.78	2.67778			5	2.86	4.07	7.59	3.27	7	4.76	5.05263
	6	1.50526	4.56579	4.12121	3	1.6	3	5.84			6	5.18	1.09278	1.47	9	5.5	4.42	3.45349
	7	0.84	0.65	0.68	6.65517	1.8	13.1368	10.7526			7	5.76	2.95	3.52632	2.53846	7.23913	20.04	1.84444
	8	3.84	0.8	2.08	5.41	5.89412	4.52	4.88333			8	4.58	2.59794	5	4.71	7.25	7.59	4.39
	9	3.73333	2.40299	1.5	2.19	6.87	8.45455	5.91837			9	1.65	3.8	2.59	7.53535	2.28571	4.25	11.2556
	10	1.79	1.48	1.91579	3.9	2.35	8.24615	1.6375			10	2.48	7	1.91765	9.56	3.37	6.21	4.35789
	11	0.71875	1.13	1.96842	1.85714	4.925	10.23	9.3			11	2.11765	1.77778	1.91	5.61	1.50526	10.4545	3.7
	12	1.25	2.12	3.41026	5.6	8.01	5.08955	6.77273			12	9.74118	2.1	2.64	8.8	4.87	8.88	10.7529
	13	2.84906	1.64	1.86	5.61957	7.96	10.8824	10.4125			13	4.56	5.96296	4.27	7.48889	1.05882	3.51	4
	14	3.05155	1.96	1.87	9.95789	6.27451	3.65	8			14	4.91	0.4	2.80952	15.6667	4.63158	3.88571	7.07
	15	4.44211	9.86	1.1	7.50526	1.89	7.12	3.22105			15	1.94845	4.88	4.29	2.94	6.69	6.3	5
	16	1.72222	5.37	2.79	3.25	5.31	4.23	4.71			16	1.43158	4.06	2.825	6.78	10.9	11.2368	5.67143
	17	2.8913	2.36	4.02857	4.07778	2.27	7.73	2.45			17	4.55	4.9	4.05	4.75	7.77895	5.43	7.6
	18		2.17	5.51	3.26	5.54	6.28	5.88			18	2.83158	2.84932	4.98305	5.56471	8.51667	8.77	5.06667
	19		4.44	3	2.62857	8.79	1.70667	11.88			19		3.59	1.17	5.24	14.6	7.08889	5.04
	20		4.4	8.06	6.35366	5.12	7.82	3.52941			20		5.6	5.125	6.3	5.97	2.27273	4.41111
	21		6.76	3.33333	1.78824	3.98824	9.7375	2.5			21			7.18421	5.97895	7.89	3.85714	6.77333
	22		2.84	2.26866	2.5	2.08	2.77	9.76667			22		6.43	4.41935	10.06	2.29	3.83333	6.37
	23				4.17895	3.2	2.65	11.59			23		3.4902	3.05556	6.32292	2.42857	2.78	9.09
	24					1.35714		8.15			24		2.06186	4.62	7.2875	7.17143	4.16667	7.68919
	25										25		2.29474	5.13	4.74	9.925	6.41818	5.25
	26										26			1.59	2.2	3.29	7.77647	12.6444
	27										27			2.09	4.73	7.74	6.7	1.75714
	28										28			2.96739	3.92	10.3671	7.35	4.85714
	29										29				5.25	3.46	8.86747	4.41429
											30				4.74138	1.7125	5.25333	7
											31				6.96	2.77895	4.62857	6.5125
	Average	2.45839	3.49085	2.79065	4.38216	4.83155	6.96543	6.74771			32				4.63	0.8	9.61	10.9778
	SD	1.19207	2.42664	1.86668	2.14807	2.33121	3.4762	3.746			33				5.9		7.07	7.43299
	SE	0.289119	0.517361	0.397978	0.447903	0.475857	0.724838	0.764649			34				4.15		4.86207	13.2
	n	17	22	22	23	24	23	24			35							5.49
											36							11.3
											37							11.4146
											38							10
											39							5.02667
											40							3.90769
											41
											42
											43
											44
											Average	3.71578	3.88634	3.62602	6.47318	6.46571	6.29287	6.62839
											SD	2.01274	1.94646	1.57764	3.21558	4.44569	3.3587	2.9153
											SE	0.474408	0.397319	0.298147	0.551467	0.785894	0.576013	0.46095
											n	18	24	28	34	32	34	40
		Eurydendroid Highest Burst frequency after PC-Ablation (Supl. Fig. 9 C and D)
		Control										4-OHT
		control
		cell #	0 dpt	1 dpt	2 dpt	3 dpt	7 dpt	10 dpt	14 dpt			cell #	0 dpt	1 dpt	2 dpt	3 dpt	7 dpt	10 dpt	14 dpt
		1	6	47	11	9	12	21	16			1	25	23	6	35	15	8	13
		2	10	62	20	8	13	60	22			2	27	47	35	12	27	9	16
		3	8	12	9	31	13	54	7			3	24	6	25	20	23	8	11
		4	5	65	3	16	21	37	9			4	47	99	44	26	100	14	8
		5	7	8	4	4	22	64	14			5	32	59	28	25	58	41	22
		6	44	23	12	13	20	18	16			6	48	9	8	29	34	9	14
		7	8	7	7	10	17	54	55			7	76	25	51	19	94	59	5
		8	16	7	43	24	73	29	24			8	66	45	26	32	82	19	17
		9	12	8	29	32	14	13	21			9	20	57	61	69	36	13	22
		10	13	5	12	55	33	24	7			10	41	43	12	85	59	71	69
		11	7	42	22	4	79	24	21			11	10	19	36	22	13	53	42
		12	24	10	8	16	20	14	13			12	21	16	20	18	46	53	19
		13	75	8	18	12	21	21	16			13	14	12	15	43	13	27	15
		14	25	27	37	32	13	18	20			14	9	13	11	77	12	9	28
		15	30	10	7	20	4	12	11			15	7	18	47	42	80	26	11
		16		5	37	19	32	9	12			16	17	77	8	54	58	22	24
		17		8	9	20	14	13	9			17	28	42	13	16	126	18	12
		18		28	44	15	46	32	15			18	18	37	9	33	83	16	10
		19		31	15	21	48	12	19			19		39	20	23	32	19	11
		20		11	20	21	43	74	27			20		13	17	65	19	9	11
		21		22	69	8	34	71	12			21		112	20	13	24	9	11
		22			17	14	26	15	33			22		13	30	19	17	23	29
		23				35	13	17	92			23		6	17	33	7	19	110
		24					20		46			24		44	27	13	15	9	28
		25										25			36	47	27	55	9
		26										26			28	20	14	34	27
		27										27			27	35	34	25	8
		28										28			12	51	79	47	16
		29										29				14	22	46	12
		30										30				13	15	32	48
		31										31				34	24	43	19
		32										32				39	3	86	29
		33										33				12		78	50
												34				88			25
		Average	19.3333	21.2381	20.5909	19.087	27.125	30.6957	22.375			35						25	22
		SD	18.9196	18.6089	16.4423	11.8433	18.8917	21.0053	18.8098			36							27
		SE	4.88503	4.06079	3.50551	2.46951	3.85625	4.3799	3.83954			37							79
		n	15	21	22	23	24	23	24			38							33
												39							32
												40							13
												41
												42
												Average	29.4444	36.4167	24.6071	34.5882	40.3438	30.4118	25.175
												SD	19.3093	28.5504	14.1194	21.4082	31.8885	21.7034	21.0627
												SE	4.55125	5.82782	2.66832	3.67147	5.63715	3.7221	3.3303
												n	18	24	28	34	32	34	40
