# Supplementary material for: Lifelong regeneration of cerebellar Purkinje cells after induced cell ablation in zebrafish
Source: eLife. 2023 Apr 12;12:e79672. doi: 10.7554/eLife.79672 (PMC10147380; doi:10.7554/eLife.79672)
Supplement: Figure 3—source data 1. [file elife-79672-fig3-data1.xlsx]

## Sheet: Tabelle1
Average frequency - Fig 3C and Suppl. Fig 6E
												4-OHT
	Control											3 dpt	4dpt	5dpt	6dpt	7dpt	8 dpt	10 dpt	14 dpt	21 dpt
	3 dpt	4dpt	5dpt	6dpt	7dpt	8 dpt	10 dpt	14 dpt	21 dpt		1st replicate	0	0	4.27	4.74286	9.2	18.875	7.16667	6.9	19.3091
1st replicate	7.38	10.5	2.90769	10.7812	12.96	7.2	16.8	9.19	7.53333			0	5.5	4.56	3.79	9.62	10.35	2.32	8.82	12.2545
	4.97	7.69	4.97	4.97	5.37778	4.92	7.69	2.4	17.6625			0	0	4.13514	7.66	7.3	5.14	10.83	7.92308	12.75
	4.66	6.59375	3.54	5.15	9.28	10.4667	6.96	14.9	11.45			4.6	0.657143	1.44	7.92	5.37	7.7	9.88	4.09	12.3
	5.79	10.18	7.98305	9.16	5.05	6	11.12	10.5	13.8889			0	0	0.380952	1.36364	5.58	3.25	8.89	4.93	10.6364
	20.6	11.2	9.97895	6.73	4.87	6.39394	5.83	5.41	16.3111			0.55	0	5.07	4.51	8.05	1.09	12.93	7.13	20.5
	5.32	7	4.4	10.99	12.7667	8.18	13.53	9.81818	13.5286			0.18	1.4	3.06	5.64444	12.5	3.54	3.67	9.08	11.7684
	8.44706	4.97778	11.75	14.775	2.46	9.09091	1.85	7.2	14.0222			0.74	6.87	0	0.23	2.84	9.16	0.46	6.93	8.92857
		19.9333	10.32	18.4615	9.41	6.18	6.55	3.66	11.56			9.86	0	9.19	0.65	3.99	10.5	3.475	9.53	22.05
		6.91429	5.84	6.55	7.28		4.43	7.65714	6.15714			0	4.09412	2.57778	0.52	5.3	7.51	2.43	7.19149	15.78
		7.66071	14.2	1.25	8.1			7.21111	8.16			0	0	9	9	3.24	4.62	14.2	6.56	3.7027
		6.84906	6.36		4.2807			8.28	15.8526				7.97826	3.66	2.93	4.2	3.66667	13.68	3.68	5.30667
			7.47619					11.4667	4.06				0	0.65	0.87	4.4	1.43	10.98	4.98	16.4
								5.81	12.2889				0	0.386364	5.15	1.21	0.46	7.3	4.07
								10.02	5.89				1.28	7.30667	4.12	3.6	5.85714	7.45	3.22
								4.94					2.02	0.25	8.62	2.92	0.39	8.48387	8.67
								5.18					0	1.5	0.67	3.7	2.81	6.45714	8.23
													0	5.44286	0.74	6.06	2.48	6.83	7.99
													0	0.883333	2.24	2.96	3.54	9.02	6.37
2nd replicate	10.0364	15.06	8.64	10.4487	10.4	8.87	8.86364	15.86	8.23						1.46	1.55	9.4		4.2
	11.7812	14.2	12.98	9.68	13.07	8.71	11.14	8.67	9.63333						0.461538	1.63			9.24
	12.98	9.42	4.72727	8.8	6.96471	8.5	11.8	11.46	12.26							2.38
	5.82	7.74	4.42	8.63	5.29	8.9	8.075	11.7143	7.61							4.91
	7.33333	10.62	8.54	9.64	8.6375	6.52	13.96	9.5	11.925							2.01
	5	10.22	7.54	6.21	15.25	5.06	5.79	8.26	7.17143
	12.2	12.52	7.26	7.33	4.11	6.75294	7.29	17.8909	9.67
	10.46	4.58	10.16	7.65	2.5	6.51667	7.39	4.64	7.08		2nd replicate	0	0	7.23	7.86	5.75	5.93	6.10667	5.82857	18.7778
	5.2	3.64	3.65	7.14		8.44	1.88	12.95	8.75294			0	0	10.8111	3	5.28	2.37	10.56	9.3	4.63333
	6.25	3.18	17.43	7.20635		9.22		11.15	7.24615			0	0	3.88	4.05	6.06	8.35	6.91	13.5222	9.11111
	6.05		15.8286	7.56				4.91	13.2903			0.47	3.37349	3.72	0.22	2.35	5.84	5.36	12.29	7.88
	4.21								7.94444			6.88	0	5.63	4.3	0.63	3.94	7.93333	9.14444	8.59
	6								8.32			2.84	0.17	8.96	3.5	6.84	5.35	9.47	9.6	9.3
									18.88			0.44	0	5.26	4.62105	1.47	4.33	7.13	10.08	7.85455
												0	0	12.5	3.58	1.19	6.15	6.6	11.97	11.2889
Average	8.0244	9.07995	8.30008	8.52918	7.79249	7.55117	8.38604	8.9129	10.585			0.0142857	3.1	4.46	3.45	1.37	3.59	7.56	9.16	10.4933
SD	4.01273	4.06516	4.03908	3.54929	3.79174	1.57726	4.03963	3.80313	3.81737			3.78462	0.133333	0	0.85	6.02857	4.09	7.82	9.4	11.43
SE	0.897274	0.88709	0.842206	0.774519	0.869885	0.371763	0.952151	0.731913	0.721416			0.32	0	0.12	7.35	9.9375	2.4186	7.89	6.81	13.7222
n	20	21	23	21	19	18	18	27	28			0	1.25	0.5	7.3125	6.03529	2.52	10.62	6.47	10.01
													1.06	0	5.98	6.26		6.51111	9.92	13.57
													0.47	0.32	4.9	3.825		14.6154	8.36	8.83333
													0	0.18	6.05769	6.53		7.57778	7.74	8.52
													2.64	0	2.96	11.6		2.81	7.06	7.48
														1.11667	3.01	3.76		2.90278	7.43	13.9
														0.44	2.62			3.96	7.11	15.8111
														2.71	0.47					10.9412
														1.52	0.906667					18.902
														1.86957	5.58					15.3222
														4.46667	1.52					12.07
														4.63077	3.54					10
															2.13333					12.22
											Average	1.33387	1.1999	3.43066	3.62364	4.8643	5.20773	7.53486	7.71615	11.9553
											SD	2.59878	2.07573	3.28146	2.5391	2.8916	3.72293	3.41472	2.3453	4.36091
											SE	0.541884	0.350863	0.50634	0.378507	0.451593	0.658127	0.561376	0.375548	0.71693
											n	23	35	42	45	41	32	37	39	37
	Highest Frequency - Figure 3D and Suppl. Fig. 6F
	Control											4-OHT
	3 dpt	4dpt	5dpt	6dpt	7dpt	8 dpt	10 dpt	14 dpt	21 dpt			3 dpt	4dpt	5dpt	6dpt	7dpt	8 dpt	10 dpt	14 dpt	21 dpt
1st replicate	26	17	6	18	21	19	18		12		1st replicate	0	0	16	18	34	29	16	21	34
	18	13	15	18	40	12	11	32	22			0	11	13	13	23	28	11	26	23
	16	23	62	14	55	22	12	8	14			0	0	16	34	36	13	58	26	43
	17	72	29	29	19	21	44	23	18			10	5	8	43	20	19	29	14	16
	31	31	20	34	47	17	38	21	20			0	0	3	11	17	11	29	20	16
	77	10	11	42	40	25	44	19	18			9	0	29	26	38	6	37	19	34
	27	18	36	51	25	18	8	26	20			0	8	14	61	45	16	51	57	18
	37	55	23	53	6	40	26	25	9			2	18	0	2	19	36	31	63	31
	46	21	34	14	22	25	30	15	17			7	0	44	7	26	42	35	35	18
	11	29	79		17	17		12	12			20	32	13	7	34	42	4	17	23
	10	22	26		35			18	19				0	31	20	15	38	20	24	27
	17		9		27			25	7				16	16	9	26	29	28	19	21
			35					13	25				0	2	4	32	20	28	14	42
								40	13				0	2	22	32	2	18	8	10
								13	15				18	24	25	11	12	26	6	22
								27					33	2.5	34	26	5	23	27
													0	6	4	45	6	29	18
													0	14	6	37	8	23	6
2nd replicate	18	38	22	21	16	18	12	22	15					4	20	44	20	25	27
	34	34	56	22	37	28	16	13	16						16	9	13	32	15
	27	21	14	19	15	21	15	17	19						4	18			39
	21	21	21	26	23	38	58	15	13							33			30
	27	33	25	56	19	49	19	15	18							11			46
	33	31	47	11	39	25	12	13	13							55			40
	81	25	18	45	31	18	15	21	16							50			15
	98	30	37	42		25	23	11	15
	33	57	33	24		24	16	36	13		2nd replicate	0	0	33	35	23	26	21	12	27
	20	40	20	18		32		38	14			0	0	28	16	34	24	19	19	18
	15	48	11	15		25		20	26			0	0	18	23	41	23	11	22	24
	28	29	14	30		25			27			0	0	28	6	26	33	13	23	16
	23			18					19			4	24	28	32	4	25	14	18	16
	30								14			33	0	56	22	30	51	23	24	31
									32			31	2	34	43	26	39	15	24	21
									22			3	0	48	31	13	44	14	19	22
												0	0	41	26	10	18	18	15	28
												1	11	0	13	22	14	18	17	34
												47	1	3	48	16	9	30	15	25
												3	0	14	11	35	5	23	16	23
													5	0	17	15		21	33	46
													5	8	45	22		41	14	37
Average	31.5769	31.2174	28.12	28.1818	28.1053	24.7273	23.1667	20.6923	17.1935				4	2	39	18		37	27	44
SD	21.7204	15.0513	17.669	13.9647	12.5561	8.58671	14.1182	8.56864	5.38776				0	0	17	32		11	20	31
SE	4.25971	3.13841	3.5338	2.97729	2.88056	1.83069	3.32769	1.68045	0.96767				57	10	36	47		61	36	45
n	26	23	25	22	19	22	18	26	31					5	20	19		30	30	24
														16	4					27
														9	20					22
														5	20					31
														21	35					36
														16	13					21
																				26
																				31
											Average	7.72727	7.14286	16.2024	21.7727	27.186	22.0625	25.6053	23.6279	27.1
											SD	13.1192	12.6704	14.3344	13.9848	12.211	13.3463	12.4608	12.0258	8.96374
											SE	2.79702	2.14168	2.21185	2.10829	1.86215	2.35932	2.02141	1.83392	1.41729
											n	22	35	42	44	43	32	38	43	40
	Cs/Ss Ratio - Figure 3E and Suppl. Fig. 6G
	control											4-OHT
	3 dpt	4dpt	5dpt	6dpt	7dpt	8 dpt	10 dpt	14 dpt	21 dpt			3 dpt	4dpt	5dpt	6dpt	7dpt	8 dpt	10 dpt	14 dpt	21 dpt
1st replicate	0.0453258	0.0468594	0.0384615	0.0237389	0.0196696	0.0393701	0.0108303	0.0245262	0		1st replicate	0	0	0.0465686	0.0524496	0.0222222	0.00908848	0.0141509	0.0267857	0
	0.0397489	0.065097	0.0665236	0.0688172	0.034188	0.0718954	0.0363881	0.0859729	0			0	0	0	0	0.0344086	0.0197044	0.0131004	0.0243902	0.00574498
	0.0378619	0.0138382	0.0630631	0.0383064	0	0.0194805	0.00578035	0	0			0	0	0.113051	0.0624133	0.0656934	0.0259481	0.0314286	0.0716887	0
	1e-05	0.0251762	0.0266065	0.0663562	0.0907127	0.0452962	0.0267775	0.0105871	0			0	1.55556	0.180328	0.0790191	0.114108	0.0158311	0.0443975	0.087766	0
	0.0279441	0.0351202	1e-05	0.10509	0.0993228	0.0770016	0.106262	0.0207547	0			0	0	0.581028	1.5	0.155279	0	0.0672269	0.0931264	0
	0.037037	0.0327869	0.0401891	0.0261438	0	0	0.0296804	0.0207939	0			0	0	0	1e-05	0.0481771	0.238636	0.0149137	0	0
	0.0107693	0	0.0190807	0.012333	0.194175	0.0635065	0.217105	0.00840336	0			0	0.206897	0	0.0561331	0.0347682	0.026087	0.118902	0.0133929	0.00282849
		0.00656455	0.0217822	0.00727476	0.0228261	0.0673575	0.0598706	0	0.00123732			0.5	0.0520674	0	0.916667	0.100775	0.0223214	0.393939	0.0468278	0
		0	0.093633	0.0564516	0.0196078		0.0752427	0	0			0.213115	0	0.0325843	0.3	0.10221	0.0174419	0.0490566	0.0358696	0
		0.0190024	0.0150107	1e-05	0.0201511			0	0			0.00921187	0	0	0.333333	0.023166	0.074392	0	0.0336391	0
		0.0196629	0.0111288		0			0	0				0	0.0332951	0.039261	0.0872483	0.0382023	0.00637845	0.0429253	0
			0.0260767					0.0100671	0				0.0426136	0.133127	0.0353357	0.0535117	0.129363	0.0148368	0.0656371	0
								0.0192982	0.00490641				0	0	0.225352	0.042654	1e-05	0.0329257	0.00809717	0
								0.0193286	0				0	0.214286	0.0177866	0.234694	0.4375	0.0751105	0	0
								1e-05					0	0.00967296	0.0248756	0.00278552	0	0.0376045	0.141844	0
								0.0401606					0.0860215	0.666667	0.010551	0.0174216	0	0.0478088	0
													0	0.415094	0.522727	0.00543478	0.161157	0.102439	0.0619355
2nd replicate	0.0534351	0.00566572	0.034263	0.0189474	0.0267086	0.0356718	0.0127273	0.00813953	0.0321429				0	0.0244689	0.37037	0.0341297	0.0290456	0.0133531	0.0322997
	0.0236978	0.0501672	0.04	0.0328639	0.059034	0.00950119	0.0154905	0.00880282	0.020816					0	0.0135747	0.116981	0.0231214	0.0403691	0
	0.0450886	0.105495	0.133333	0.0310633	0.0454546	0.0421546	0.0199435	0.0156057	0.0339674						0.106061	0.260163	0		0.157025
	0.0294627	0.0631868	0.0276775	0.0299145	0.0282738	0.0848586	0.0108617	0.0160428	0.0302376						0.428571	0.13986			0.0297177
	0.0570824	0.0152964	0.0182328	0.08	0.0112732	0.0284553	0.0175747	0.0122549	0.0421424							0.19598
	0.0517241	0.00788955	0.016	0.065407	0.0844327	0.0123457	0.0340425	0.00408163	0.0168244							0.0627706
	0.046	0.0203749		0.00665188	0.0683761	0.0155844	0.0193103	0.00869565	0.0205761							0.148571
	0.0547667	0.062645		0.016129		0.0107784		0.0294118	0.0150862
	0.038206					0.01766		0.0229358	0.00733496
	0.034188							0.0446809	0.0185185
	0.0822622								0.00726392		2nd replicate	0	0	0.0242866	0.121495	0.0492701	0.0102215	0.0251819	0.0408163	0.0203774
	0.0434783								0.033954			0	0	0.0484914	0.0331633	0.0688259	0.0772727	0.0114942	0.0496614	0.0373134
												0	0	0.172205	0.294118	0.0594406	0.0308642	0.0206795	0.0219162	0.0212978
												0	0	0.0420168	0.0189574	0.169154	0	0.0268199	0.00244698	0.0207254
												0.236842	0.0141469	0.0368324	0.0416667	0.75	0.0808824	0.0218978	0.0246514	0
												0.0377074	0	0.0491803	0.1026	0.0379363	0.161017	0.0860092	0.0446137	0.0175055
												0.198312	0	0.0233463	0.136508	0.204918	0.0199005	0.0127841	0.0212766	0.0285714
												0.571429	0	0.023751	0.0849057	0	1e-05	0.1	0.0109797	0.00793651
												0	0.0299003	0.0799032	0.888889	0.036855	0.0965147	0.123328	0.0189099	0.00510856
Average	0.0398994	0.0313067	0.0383929	0.0380833	0.0457892	0.037701	0.043618	0.0165598	0.0109618			0	0.333333	0	0.0263158	0.0142894	0.0833333	0.034076	0.0217391	0.0187166
SD	0.017861	0.0279306	0.0327319	0.0291693	0.0484588	0.0267629	0.0535804	0.0185943	0.0137816			0.0123457	0	0.714286	0.0629067	0.0325048		0.00663507	0.0396947	0.00808097
SE	0.00409759	0.00640772	0.00771499	0.00687527	0.0114218	0.00649096	0.0133951	0.00364663	0.0027028			0.142857	0.25	0.136364	0.0227273	0.0793103		0.0244755	0.0352	0.0172764
n	19	19	18	18	18	17	16	26	26			0	0.204545	0	0.0882353	0.0515464		0.0021097	0.0620985	0.00444115
													0.305556	0.454545	0.135849	0.017134		0.0224888	0.10582	0.00378788
													0	0.8	0.110169	0.0419162		0.128514	0.107296	0.0070922
													0	0	0.566667	0.170124		0.142076	0.0321637	0.00268097
														0.313725	0.446809			0.00507614	0.0108843	0
														0.375	0.0588235				0.0502216	0.00444695
														0.106122	0.169231					0.0333333
														0.0857143	0.0959752					0.011318
														0	0.267327					0.012556
														0.0578947						0.0117351
														0.0415225
											Average	0.0835574	0.0906069	0.143699	0.211139	0.097156	0.0609289	0.0530997	0.0429066	0.00818581
											SD	0.162209	0.275531	0.214409	0.300538	0.125295	0.0923061	0.0708104	0.0377844	0.0103067
											SE	0.0338228	0.0472531	0.033084	0.0463741	0.0198109	0.0168527	0.0118017	0.00605035	0.00169442
											n	23	34	42	42	40	30	36	39	37
Eurydendroid Activity after PC-Ablation
Average Frequency - Fig. 3H and Supl. Fig. 9B
Control										4-OHT
cell #	0 dpt	1 dpt	2 dpt	3 dpt	7 dpt	10 dpt	14 dpt			cell #	0 dpt	1 dpt	2 dpt	3 dpt	7 dpt	10 dpt	14 dpt
1	3.47368	7.64	4.78	3.8	6.8125	4.45614	9.7625			1	3.87368	6.92632	2.84	16.1333	5.33333	3.375	7.24
2	2.91892	4.85	1.2381	4.8875	5.8	5.32	15.6714			2	2.36	6.26	3.69	3.6	20.0308	2.16	6.89
3	3.91489	4.97	4.86	6.22	8.34568	8.56667	2.98667			3	2.12	1.925	3.94545	11.53	6.37778	4.42	7.54737
4	1.23158	0.75	0.4	5.4	4.95	9.82857	3.65263			4	3.93	6.25333	3.83	6.2	16.1412	5.73077	3.68421
5	1.62	3.64	0.62	0.75	4.82	14.78	2.67778			5	2.86	4.07	7.59	3.27	7	4.76	5.05263
6	1.50526	4.56579	4.12121	3	1.6	3	5.84			6	5.18	1.09278	1.47	9	5.5	4.42	3.45349
7	0.84	0.65	0.68	6.65517	1.8	13.1368	10.7526			7	5.76	2.95	3.52632	2.53846	7.23913	20.04	1.84444
8	3.84	0.8	2.08	5.41	5.89412	4.52	4.88333			8	4.58	2.59794	5	4.71	7.25	7.59	4.39
9	3.73333	2.40299	1.5	2.19	6.87	8.45455	5.91837			9	1.65	3.8	2.59	7.53535	2.28571	4.25	11.2556
10	1.79	1.48	1.91579	3.9	2.35	8.24615	1.6375			10	2.48	7	1.91765	9.56	3.37	6.21	4.35789
11	0.71875	1.13	1.96842	1.85714	4.925	10.23	9.3			11	2.11765	1.77778	1.91	5.61	1.50526	10.4545	3.7
12	1.25	2.12	3.41026	5.6	8.01	5.08955	6.77273			12	9.74118	2.1	2.64	8.8	4.87	8.88	10.7529
13	2.84906	1.64	1.86	5.61957	7.96	10.8824	10.4125			13	4.56	5.96296	4.27	7.48889	1.05882	3.51	4
14	3.05155	1.96	1.87	9.95789	6.27451	3.65	8			14	4.91	0.4	2.80952	15.6667	4.63158	3.88571	7.07
15	4.44211	9.86	1.1	7.50526	1.89	7.12	3.22105			15	1.94845	4.88	4.29	2.94	6.69	6.3	5
16	1.72222	5.37	2.79	3.25	5.31	4.23	4.71			16	1.43158	4.06	2.825	6.78	10.9	11.2368	5.67143
17	2.8913	2.36	4.02857	4.07778	2.27	7.73	2.45			17	4.55	4.9	4.05	4.75	7.77895	5.43	7.6
18		2.17	5.51	3.26	5.54	6.28	5.88			18	2.83158	2.84932	4.98305	5.56471	8.51667	8.77	5.06667
19		4.44	3	2.62857	8.79	1.70667	11.88			19		3.59	1.17	5.24	14.6	7.08889	5.04
20		4.4	8.06	6.35366	5.12	7.82	3.52941			20		5.6	5.125	6.3	5.97	2.27273	4.41111
21		6.76	3.33333	1.78824	3.98824	9.7375	2.5			21			7.18421	5.97895	7.89	3.85714	6.77333
22		2.84	2.26866	2.5	2.08	2.77	9.76667			22		6.43	4.41935	10.06	2.29	3.83333	6.37
23				4.17895	3.2	2.65	11.59			23		3.4902	3.05556	6.32292	2.42857	2.78	9.09
24					1.35714		8.15			24		2.06186	4.62	7.2875	7.17143	4.16667	7.68919
25										25		2.29474	5.13	4.74	9.925	6.41818	5.25
26										26			1.59	2.2	3.29	7.77647	12.6444
27										27			2.09	4.73	7.74	6.7	1.75714
28										28			2.96739	3.92	10.3671	7.35	4.85714
29										29				5.25	3.46	8.86747	4.41429
										30				4.74138	1.7125	5.25333	7
										31				6.96	2.77895	4.62857	6.5125
Average	2.45839	3.49085	2.79065	4.38216	4.83155	6.96543	6.74771			32				4.63	0.8	9.61	10.9778
SD	1.19207	2.42664	1.86668	2.14807	2.33121	3.4762	3.746			33				5.9		7.07	7.43299
SE	0.289119	0.517361	0.397978	0.447903	0.475857	0.724838	0.764649			34				4.15		4.86207	13.2
n	17	22	22	23	24	23	24			35							5.49
										36							11.3
										37							11.4146
										38							10
										39							5.02667
										40							3.90769
										41
										42
										43
										44
										Average	3.71578	3.88634	3.62602	6.47318	6.46571	6.29287	6.62839
										SD	2.01274	1.94646	1.57764	3.21558	4.44569	3.3587	2.9153
										SE	0.474408	0.397319	0.298147	0.551467	0.785894	0.576013	0.46095
										n	18	24	28	34	32	34	40
