# Supplementary material for: Lifelong regeneration of cerebellar Purkinje cells after induced cell ablation in zebrafish
Source: eLife. 2023 Apr 12;12:e79672. doi: 10.7554/eLife.79672 (PMC10147380; doi:10.7554/eLife.79672)
Supplement: Figure 4—figure supplement 1—source data 1. [file elife-79672-fig4-figsupp1-data1.xlsx]

## Sheet: Sheet1
						Supplem. Fig. 11A	percentage of average PCs number			(4-OHT=PC-ablated, EtOH=control)
						4-OHT 2dpt	EtOH 2dpt		4-OHT 10 dpt	EtOH 10dpt
					trial#1	7.14894	100		15.684	100
					trial#2	7	100		42	100
						Supplem. Fig. 11B	percentage of average PCs number			(4-OHT=PC-ablated, EtOH=control)
						4-OHT 2dpt	EtOH 2dpt		4-OHT 9-11dpt	EtOH 9-11dpt
					trial#1	11.6176	100		39.9439	100
					trial#2	3.07246	100		40.6437	100
					trial#3	7.03518	100		52.6596	100
					trial#4	9	100		26	100
