# Supplementary material for: Lifelong regeneration of cerebellar Purkinje cells after induced cell ablation in zebrafish
Source: eLife. 2023 Apr 12;12:e79672. doi: 10.7554/eLife.79672 (PMC10147380; doi:10.7554/eLife.79672)
Supplement: Figure 4—source data 1. [file elife-79672-fig4-data1.xlsx]

## Sheet: Hoja1
	Trial#1 - 2dpt
	(control)
	4 frames per second
		EtOH 2dpt	ser02						degrees rot	# saccades	speed rotat	speed average		EtOH 2dpt	ser03						degrees rot	# saccades	speed rotat	speed average		EtOH 2dpt	ser04						degrees rot	# saccades	speed rotat	speed average		EtOH 2dpt	ser05						degrees rot	# saccades	speed rotat	speed average
		1	0	0	0	0	2.429	-2.429	-1.108	8	1.108	1.55959		1	0	0	0	0	9.9	9.9	-2.318	9	2.318	1.92965		1	0	0	0	0	14.293	14.293	-2.476	7	2.476	1.53751		1	0	0	0	0	11.338	-11.338	-4.222	6	4.222	1.75166
		2	0	0	0	0	1.321	-1.321	-1.534		1.534			2	0	0	0	0	12.218	12.218	-1.986		1.986			2	0	0	0	0	16.769	16.769	-1.377		1.377			2	0	0	0	0	7.116	-7.116	-2.605		2.605
		3	0	0	0	0	0.213	0.213	-2.31		2.31			3	0	0	0	0	14.204	14.204	-1.473		1.473			3	0	0	0	0	18.146	18.146	-1.099		1.099			3	0	0	0	0	4.511	-4.511	-0.766		0.766
		4	0	0	0	0	2.523	2.523	-1.141		1.141			4	0	0	0	0	15.677	15.677	-1.673		1.673			4	0	0	0	0	19.245	19.245	-0.864		0.864			4	0	0	0	0	3.745	-3.745	-1.002		1.002
		5	0	0	0	0	3.664	3.664	-1.454		1.454			5	0	0	0	0	17.35	17.35	32.79					5	0	0	0	0	20.109	20.109	-1.108		1.108			5	0	0	0	0	2.743	-2.743	-4.492		4.492
		6	0	0	0	0	5.118	5.118	-1.598		1.598			6	0	0	0	0	15.44	-15.44	-3.84		3.84			6	0	0	0	0	21.217	21.217	-1.855		1.855			6	0	0	0	0	1.749	1.749	0		0
		7	0	0	0	0	6.716	6.716	-1.877		1.877			7	0	0	0	0	11.6	-11.6	-1.908		1.908			7	0	0	0	0	23.072	23.072	-2.145		2.145			7	0	0	0	0	1.749	1.749	-1.443		1.443
		8	0	0	0	0	8.593	8.593	-1.676		1.676			8	0	0	0	0	9.692	-9.692	-1.952		1.952			8	0	0	0	0	25.217	25.217	0		0			8	0	0	0	0	3.192	3.192	-2.627		2.627
		9	0	0	0	0	10.269	10.269	-1.732		1.732			9	0	0	0	0	7.74	-7.74	-1.615		1.615			9	0	0	0	0	25.217	25.217	28.51					9	0	0	0	0	5.819	5.819	-2.572		2.572
		10	0	0	0	0	12.001	12.001	-2.756		2.756			10	0	0	0	0	6.125	-6.125	-2.061		2.061			10	0	0	0	0	3.293	-3.293	7.094					10	0	0	0	0	8.391	8.391	-2.98		2.98
		11	0	0	0	0	14.757	14.757	-1.29		1.29			11	0	0	0	0	4.064	-4.064	-2.472		2.472			11	0	0	0	0	10.387	-10.387	-0.763		0.763			11	0	0	0	0	11.371	11.371	-2.374		2.374
		12	0	0	0	0	16.047	16.047	-1.709		1.709			12	0	0	0	0	1.592	-1.592	-5.72		5.72			12	0	0	0	0	9.624	-9.624	-2.264		2.264			12	0	0	0	0	13.745	13.745	-2.071		2.071
		13	0	0	0	0	17.756	17.756	-1.982		1.982			13	0	0	0	0	4.128	4.128	-2.214		2.214			13	0	0	0	0	7.36	-7.36	-1.202		1.202			13	0	0	0	0	15.816	15.816	-3.225		3.225
		14	0	0	0	0	19.738	19.738	-1.882		1.882			14	0	0	0	0	6.342	6.342	-2.511		2.511			14	0	0	0	0	6.158	-6.158	-1.328		1.328			14	0	0	0	0	19.041	19.041	-2.855		2.855
		15	0	0	0	0	21.62	21.62	33.03					15	0	0	0	0	8.853	8.853	-1.242		1.242			15	0	0	0	0	4.83	-4.83	-1.825		1.825			15	0	0	0	0	21.896	21.896	-0.852		0.852
		16	0	0	0	0	11.41	-11.41	-3.867		3.867			16	0	0	0	0	10.095	10.095	-1.306		1.306			16	0	0	0	0	3.005	-3.005	-4.02		4.02			16	0	0	0	0	22.748	22.748	-3.211		3.211
		17	0	0	0	0	7.543	-7.543	0		0			17	0	0	0	0	11.401	11.401	-1.965		1.965			17	0	0	0	0	1.015	1.015	-1.026		1.026			17	0	0	0	0	25.959	25.959	-2.559		2.559
		18	0	0	0	0	7.543	-7.543	0		0			18	0	0	0	0	13.366	13.366	0		0			18	0	0	0	0	2.041	2.041	-2.606		2.606			18	0	0	0	0	28.518	28.518	-1.418		1.418
		19	0	0	0	0	7.543	-7.543	-2.971		2.971			19	0	0	0	0	13.366	13.366	-2.848		2.848			19	0	0	0	0	4.647	4.647	-1.893		1.893			19	0	0	0	0	29.936	29.936	-0.051		0.051
		20	0	0	0	0	4.572	-4.572	-0.942		0.942			20	0	0	0	0	16.214	16.214	0		0			20	0	0	0	0	6.54	6.54	-1.876		1.876			20	0	0	0	0	29.987	29.987	0		0
		21	0	0	0	0	3.63	-3.63	-1.203		1.203			21	0	0	0	0	16.214	16.214	-3.145		3.145			21	0	0	0	0	8.416	8.416	-2.17		2.17			21	0	0	0	0	29.987	29.987	22.878
		22	0	0	0	0	2.427	-2.427	-2.531		2.531			22	0	0	0	0	19.359	19.359	0		0			22	0	0	0	0	10.586	10.586	-1.827		1.827			22	0	0	0	0	7.109	7.109	-3.579		3.579
		23	0	0	0	0	0.104	0.104	-3.409		3.409			23	0	0	0	0	19.359	19.359	-1.996		1.996			23	0	0	0	0	12.413	12.413	-1.402		1.402			23	0	0	0	0	10.688	10.688	-1.82		1.82
		24	0	0	0	0	3.513	3.513	-2.471		2.471			24	0	0	0	0	21.355	21.355	0		0			24	0	0	0	0	13.815	13.815	-2.263		2.263			24	0	0	0	0	12.508	12.508	-2.211		2.211
		25	0	0	0	0	5.984	5.984	-2.057		2.057			25	0	0	0	0	21.355	21.355	-2.284		2.284			25	0	0	0	0	16.078	16.078	-1.648		1.648			25	0	0	0	0	14.719	14.719	-2.406		2.406
		26	0	0	0	0	8.041	8.041	-2.112		2.112			26	0	0	0	0	23.639	23.639	35.301					26	0	0	0	0	17.726	17.726	-1.435		1.435			26	0	0	0	0	17.125	17.125	-1.901		1.901
		27	0	0	0	0	10.153	10.153	-1.928		1.928			27	0	0	0	0	11.662	-11.662	0		0			27	0	0	0	0	19.161	19.161	-2.208		2.208			27	0	0	0	0	19.026	19.026	-2.364		2.364
		28	0	0	0	0	12.081	12.081	-1.455		1.455			28	0	0	0	0	11.662	-11.662	-2.961		2.961			28	0	0	0	0	21.369	21.369	-2.135		2.135			28	0	0	0	0	21.39	21.39	-3.304		3.304
		29	0	0	0	0	13.536	13.536	-1.814		1.814			29	0	0	0	0	8.701	-8.701	-2.432		2.432			29	0	0	0	0	23.504	23.504	-1.399		1.399			29	0	0	0	0	24.694	24.694	-1.071		1.071
		30	0	0	0	0	15.35	15.35	-2.263		2.263			30	0	0	0	0	6.269	-6.269	-3.554		3.554			30	0	0	0	0	24.903	24.903	-0.92		0.92			30	0	0	0	0	25.765	25.765	17.125
		31	0	0	0	0	17.613	17.613	-1.223		1.223			31	0	0	0	0	2.715	-2.715	-0.063		0.063			31	0	0	0	0	25.823	25.823	-1.384		1.384			31	0	0	0	0	8.64	8.64	0		0
		32	0	0	0	0	18.836	18.836	-1.164		1.164			32	0	0	0	0	2.652	-2.652	-3.034		3.034			32	0	0	0	0	27.207	27.207	-1.231		1.231			32	0	0	0	0	8.64	8.64	-3.09		3.09
		33	0	0	0	0	20	20	-1.803		1.803			33	0	0	0	0	0.382	0.382	-3.353		3.353			33	0	0	0	0	28.438	28.438	-1.57		1.57			33	0	0	0	0	11.73	11.73	-3.045		3.045
		34	0	0	0	0	21.803	21.803	0		0			34	0	0	0	0	3.735	3.735	-2.006		2.006			34	0	0	0	0	30.008	30.008	-1.792		1.792			34	0	0	0	0	14.775	14.775	-2.38		2.38
		35	0	0	0	0	21.803	21.803	27.843					35	0	0	0	0	5.741	5.741	-1.806		1.806			35	0	0	0	0	31.8	31.8	0		0			35	0	0	0	0	17.155	17.155	-1.494		1.494
		36	0	0	0	0	6.04	-6.04	0		0			36	0	0	0	0	7.547	7.547	-1.08		1.08			36	0	0	0	0	31.8	31.8	41.303					36	0	0	0	0	18.649	18.649	-2.727		2.727
		37	0	0	0	0	6.04	-6.04	0		0			37	0	0	0	0	8.627	8.627	-3.584		3.584			37	0	0	0	0	9.503	-9.503	-1.481		1.481			37	0	0	0	0	21.376	21.376	-1.578		1.578
		38	0	0	0	0	6.04	-6.04	0		0			38	0	0	0	0	12.211	12.211	-0.635		0.635			38	0	0	0	0	8.022	-8.022	-2.615		2.615			38	0	0	0	0	22.954	22.954	21.731
		39	0	0	0	0	6.04	-6.04	0		0			39	0	0	0	0	12.846	12.846	-0.735		0.735			39	0	0	0	0	5.407	-5.407	-1.844		1.844			39	0	0	0	0	1.223	1.223	-2.004		2.004
		40	0	0	0	0	6.04	-6.04	-12.59		12.59			40	0	0	0	0	13.581	13.581	-1.757		1.757			40	0	0	0	0	3.563	-3.563	-2.286		2.286			40	0	0	0	0	3.227	3.227	-3.049		3.049
		41	0	0	0	0	6.55	6.55	-2.443		2.443			41	0	0	0	0	15.338	15.338	-2.708		2.708			41	0	0	0	0	1.277	-1.277	-2.896		2.896			41	0	0	0	0	6.276	6.276	-2.83		2.83
		42	0	0	0	0	8.993	8.993	0		0			42	0	0	0	0	18.046	18.046	-1.833		1.833			42	0	0	0	0	1.619	1.619	-1.711		1.711			42	0	0	0	0	9.106	9.106	-2.159		2.159
		43	0	0	0	0	8.993	8.993	-3.504		3.504			43	0	0	0	0	19.879	19.879	-0.987		0.987			43	0	0	0	0	3.33	3.33	0		0			43	0	0	0	0	11.265	11.265	-1.939		1.939
		44	0	0	0	0	12.497	12.497	0		0			44	0	0	0	0	20.866	20.866	0		0			44	0	0	0	0	3.33	3.33	-16.908		16.908			44	0	0	0	0	13.204	13.204	-2.88		2.88
		45	0	0	0	0	12.497	12.497	-2.456		2.456			45	0	0	0	0	20.866	20.866	0		0			45	0	0	0	0	20.238	20.238	-0.858		0.858			45	0	0	0	0	16.084	16.084	-1.846		1.846
		46	0	0	0	0	14.953	14.953	0		0			46	0	0	0	0	20.866	20.866	32.48					46	0	0	0	0	21.096	21.096	-2.405		2.405			46	0	0	0	0	17.93	17.93	-1.84		1.84
		47	0	0	0	0	14.953	14.953	21.171					47	0	0	0	0	11.614	-11.614	-2.068		2.068			47	0	0	0	0	23.501	23.501	-1.212		1.212			47	0	0	0	0	19.77	19.77	-2.274		2.274
		48	0	0	0	0	6.218	-6.218	-2.056		2.056			48	0	0	0	0	9.546	-9.546	-2.528		2.528			48	0	0	0	0	24.713	24.713	-1.435		1.435			48	0	0	0	0	22.044	22.044	-0.979		0.979
		49	0	0	0	0	4.162	-4.162	-1.774		1.774			49	0	0	0	0	7.018	-7.018	-1.622		1.622			49	0	0	0	0	26.148	26.148	-1.969		1.969			49	0	0	0	0	23.023	23.023	-1.925		1.925
		50	0	0	0	0	2.388	-2.388	-2.52		2.52			50	0	0	0	0	5.396	-5.396	-2.119		2.119			50	0	0	0	0	28.117	28.117	0		0			50	0	0	0	0	24.948	24.948	0		0
		51	0	0	0	0	0.132	0.132	-4.808		4.808			51	0	0	0	0	3.277	-3.277	-1.505		1.505			51	0	0	0	0	28.117	28.117	-1.867		1.867			51	0	0	0	0	24.948	24.948	33.321
		52	0	0	0	0	4.94	4.94	-1.455		1.455			52	0	0	0	0	1.772	-1.772	-2.086		2.086			52	0	0	0	0	29.984	29.984	-1.81		1.81			52	0	0	0	0	8.373	-8.373	-3.848		3.848
		53	0	0	0	0	6.395	6.395	-2.639		2.639			53	0	0	0	0	0.314	0.314	-1.313		1.313			53	0	0	0	0	31.794	31.794	-1.172		1.172			53	0	0	0	0	4.525	-4.525	-2.229		2.229
		54	0	0	0	0	9.034	9.034	-2.226		2.226			54	0	0	0	0	1.627	1.627	-2.784		2.784			54	0	0	0	0	32.966	32.966	-1.311		1.311			54	0	0	0	0	2.296	-2.296	-2.657		2.657
		55	0	0	0	0	11.26	11.26	-1.118		1.118			55	0	0	0	0	4.411	4.411	-1.775		1.775			55	0	0	0	0	34.277	34.277	0		0			55	0	0	0	0	0.361	0.361	-4.54		4.54
		56	0	0	0	0	12.378	12.378	-2.498		2.498			56	0	0	0	0	6.186	6.186	-2.441		2.441			56	0	0	0	0	34.277	34.277	38.991					56	0	0	0	0	4.901	4.901	-3.623		3.623
		57	0	0	0	0	14.876	14.876	-1.383		1.383			57	0	0	0	0	8.627	8.627	-2.247		2.247			57	0	0	0	0	4.714	-4.714	-1.283		1.283			57	0	0	0	0	8.524	8.524	-2.45		2.45
		58	0	0	0	0	16.259	16.259	-3.795		3.795			58	0	0	0	0	10.874	10.874	-2.154		2.154			58	0	0	0	0	3.431	-3.431	-6.112		6.112			58	0	0	0	0	10.974	10.974	-2.04		2.04
		59	0	0	0	0	20.054	20.054	-0.769		0.769			59	0	0	0	0	13.028	13.028	-1.979		1.979			59	0	0	0	0	2.681	2.681	-2.537		2.537			59	0	0	0	0	13.014	13.014	-1.672		1.672
		60	0	0	0	0	20.823	20.823	-0.685		0.685			60	0	0	0	0	15.007	15.007	-1.6		1.6			60	0	0	0	0	5.218	5.218	-1.745		1.745			60	0	0	0	0	14.686	14.686	-3.107		3.107
		61	0	0	0	0	21.508	21.508	-1.13		1.13			61	0	0	0	0	16.607	16.607	-2.205		2.205			61	0	0	0	0	6.963	6.963	-1.176		1.176			61	0	0	0	0	17.793	17.793	-1.98		1.98
		62	0	0	0	0	22.638	22.638	-1.777		1.777			62	0	0	0	0	18.812	18.812	-1.856		1.856			62	0	0	0	0	8.139	8.139	-1.907		1.907			62	0	0	0	0	19.773	19.773	-1.522		1.522
		63	0	0	0	0	24.415	24.415	-1.257		1.257			63	0	0	0	0	20.668	20.668	0		0			63	0	0	0	0	10.046	10.046	-2.761		2.761			63	0	0	0	0	21.295	21.295	0		0
		64	0	0	0	0	25.672	25.672	0		0			64	0	0	0	0	20.668	20.668	0		0			64	0	0	0	0	12.807	12.807	-1.27		1.27			64	0	0	0	0	21.295	21.295	-2.034		2.034
		65	0	0	0	0	25.672	25.672	32.412					65	0	0	0	0	20.668	20.668	-2.546		2.546			65	0	0	0	0	14.077	14.077	-2.27		2.27			65	0	0	0	0	23.329	23.329	-0.815		0.815
		66	0	0	0	0	6.74	-6.74	0		0			66	0	0	0	0	23.214	23.214	0		0			66	0	0	0	0	16.347	16.347	-3.175		3.175			66	0	0	0	0	24.144	24.144	-2.734		2.734
		67	0	0	0	0	6.74	-6.74	-1.545		1.545			67	0	0	0	0	23.214	23.214	37.788					67	0	0	0	0	19.522	19.522	-1.512		1.512			67	0	0	0	0	26.878	26.878	0		0
		68	0	0	0	0	5.195	-5.195	-1.056		1.056			68	0	0	0	0	14.574	-14.574	-2.605		2.605			68	0	0	0	0	21.034	21.034	-2.517		2.517			68	0	0	0	0	26.878	26.878	4.448
		69	0	0	0	0	4.139	-4.139	-1.49		1.49			69	0	0	0	0	11.969	-11.969	-2.698		2.698			69	0	0	0	0	23.551	23.551	-1.59		1.59			69	0	0	0	0	22.43	22.43	0		0
		70	0	0	0	0	2.649	-2.649	-0.958		0.958			70	0	0	0	0	9.271	-9.271	-1.677		1.677			70	0	0	0	0	25.141	25.141	-1.74		1.74			70	0	0	0	0	22.43	22.43	-3.863		3.863
		71	0	0	0	0	1.691	-1.691	-2.152		2.152			71	0	0	0	0	7.594	-7.594	-4.092		4.092			71	0	0	0	0	26.881	26.881	-1.053		1.053			71	0	0	0	0	26.293	26.293	-1.645		1.645
		72	0	0	0	0	0.461	0.461	-2.842		2.842			72	0	0	0	0	3.502	-3.502	-1.891		1.891			72	0	0	0	0	27.934	27.934	-2.254		2.254			72	0	0	0	0	27.938	27.938	9.256
		73	0	0	0	0	3.303	3.303	-2.661		2.661			73	0	0	0	0	1.611	-1.611	-2.446		2.446			73	0	0	0	0	30.188	30.188	-1.216		1.216			73	0	0	0	0	18.682	18.682	-0.93		0.93
		74	0	0	0	0	5.964	5.964	-1.171		1.171			74	0	0	0	0	0.835	0.835	-2.981		2.981			74	0	0	0	0	31.404	31.404	-1.061		1.061			74	0	0	0	0	19.612	19.612	-1.594		1.594
		75	0	0	0	0	7.135	7.135	-1.95		1.95			75	0	0	0	0	3.816	3.816	-2.914		2.914			75	0	0	0	0	32.465	32.465	-1.123		1.123			75	0	0	0	0	21.206	21.206	-1.401		1.401
		76	0	0	0	0	9.085	9.085	-1.947		1.947			76	0	0	0	0	6.73	6.73	-1.001		1.001			76	0	0	0	0	33.588	33.588	0		0			76	0	0	0	0	22.607	22.607	-1.407		1.407
		77	0	0	0	0	11.032	11.032	-1.68		1.68			77	0	0	0	0	7.731	7.731	-1.264		1.264			77	0	0	0	0	33.588	33.588	-1.382		1.382			77	0	0	0	0	24.014	24.014	-1.752		1.752
		78	0	0	0	0	12.712	12.712	-2.405		2.405			78	0	0	0	0	8.995	8.995	-1.73		1.73			78	0	0	0	0	34.97	34.97	32.473					78	0	0	0	0	25.766	25.766	-0.835		0.835
		79	0	0	0	0	15.117	15.117	0		0			79	0	0	0	0	10.725	10.725	-1.536		1.536			79	0	0	0	0	2.497	2.497	-4.251		4.251			79	0	0	0	0	26.601	26.601	1.924
		80	0	0	0	0	15.117	15.117	-1.509		1.509			80	0	0	0	0	12.261	12.261	-1.499		1.499			80	0	0	0	0	6.748	6.748	-1.785		1.785			80	0	0	0	0	24.677	24.677	-1.809		1.809
		81	0	0	0	0	16.626	16.626	-2.315		2.315			81	0	0	0	0	13.76	13.76	-1.827		1.827			81	0	0	0	0	8.533	8.533	-3.402		3.402			81	0	0	0	0	26.486	26.486	0		0
		82	0	0	0	0	18.941	18.941	-1.938		1.938			82	0	0	0	0	15.587	15.587	-2.508		2.508			82	0	0	0	0	11.935	11.935	-1.315		1.315			82	0	0	0	0	26.486	26.486	-3.198		3.198
		83	0	0	0	0	20.879	20.879	0		0			83	0	0	0	0	18.095	18.095	-1.917		1.917			83	0	0	0	0	13.25	13.25	-2.044		2.044			83	0	0	0	0	29.684	29.684	0		0
		84	0	0	0	0	20.879	20.879	-2.146		2.146			84	0	0	0	0	20.012	20.012	-2.745		2.745			84	0	0	0	0	15.294	15.294	-2.223		2.223			84	0	0	0	0	29.684	29.684	0		0
		85	0	0	0	0	23.025	23.025	0		0			85	0	0	0	0	22.757	22.757	-1.363		1.363			85	0	0	0	0	17.517	17.517	-1.897		1.897			85	0	0	0	0	29.684	29.684	19.194
		86	0	0	0	0	23.025	23.025	-1.955		1.955			86	0	0	0	0	24.12	24.12	0		0			86	0	0	0	0	19.414	19.414	-2.977		2.977			86	0	0	0	0	10.49	10.49	0		0
		87	0	0	0	0	24.98	24.98	0		0			87	0	0	0	0	24.12	24.12	0		0			87	0	0	0	0	22.391	22.391	-0.722		0.722			87	0	0	0	0	10.49	10.49	14.762
		88	0	0	0	0	24.98	24.98	-1.638		1.638			88	0	0	0	0	24.12	24.12	-0.385		0.385			88	0	0	0	0	23.113	23.113	-2.293		2.293			88	0	0	0	0	4.272	-4.272	-4.603		4.603
		89	0	0	0	0	26.618	26.618	0		0			89	0	0	0	0	24.505	24.505	33.293					89	0	0	0	0	25.406	25.406	-1.328		1.328			89	0	0	0	0	0.331	0.331	0.262
		90	0	0	0	0	26.618	26.618	34.756					90	0	0	0	0	8.788	-8.788	-3.249		3.249			90	0	0	0	0	26.734	26.734	-0.543		0.543			90	0	0	0	0	0.069	0.069	-0.139		0.139
		91	0	0	0	0	8.138	-8.138	-1.21		1.21			91	0	0	0	0	5.539	-5.539	-2.86		2.86			91	0	0	0	0	27.277	27.277	-1.327		1.327			91	0	0	0	0	0.208	0.208	-0.809		0.809
		92	0	0	0	0	6.928	-6.928	-1.375		1.375			92	0	0	0	0	2.679	-2.679	-2.979		2.979			92	0	0	0	0	28.604	28.604	1.84					92	0	0	0	0	1.017	1.017	-3.659		3.659
		93	0	0	0	0	5.553	-5.553	-0.956		0.956			93	0	0	0	0	0.3	0.3	-1.941		1.941			93	0	0	0	0	26.764	26.764	0		0			93	0	0	0	0	4.676	4.676	0		0
		94	0	0	0	0	4.597	-4.597	-1.909		1.909			94	0	0	0	0	2.241	2.241	-3.677		3.677			94	0	0	0	0	26.764	26.764	0		0			94	0	0	0	0	4.676	4.676	-2.065		2.065
		95	0	0	0	0	2.688	-2.688	-2.951		2.951			95	0	0	0	0	5.918	5.918	-2.142		2.142			95	0	0	0	0	26.764	26.764	10.582					95	0	0	0	0	6.741	6.741	-2.668		2.668
		96	0	0	0	0	0.263	0.263	-0.16		0.16			96	0	0	0	0	8.06	8.06	-2.729		2.729			96	0	0	0	0	16.182	16.182	-3.683		3.683			96	0	0	0	0	9.409	9.409	-1.216		1.216
		97	0	0	0	0	0.423	0.423	-1.575		1.575			97	0	0	0	0	10.789	10.789	-3.144		3.144			97	0	0	0	0	19.865	19.865	-1.622		1.622			97	0	0	0	0	10.625	10.625	-3.127		3.127
		98	0	0	0	0	1.998	1.998	-3.167		3.167			98	0	0	0	0	13.933	13.933	-3.241		3.241			98	0	0	0	0	21.487	21.487	-1.643		1.643			98	0	0	0	0	13.752	13.752	-1.706		1.706
		99	0	0	0	0	5.165	5.165	-2.503		2.503			99	0	0	0	0	17.174	17.174	-1.858		1.858			99	0	0	0	0	23.13	23.13	-2.436		2.436			99	0	0	0	0	15.458	15.458	-1.443		1.443
		100	0	0	0	0	7.668	7.668	-1.865		1.865			100	0	0	0	0	19.032	19.032	-1.648		1.648			100	0	0	0	0	25.566	25.566	0		0			100	0	0	0	0	16.901	16.901	-1.481		1.481
		101	0	0	0	0	9.533	9.533	-2.165		2.165			101	0	0	0	0	20.68	20.68	-1.686		1.686			101	0	0	0	0	25.566	25.566	-1.703		1.703			101	0	0	0	0	18.382	18.382	-1.502		1.502
		102	0	0	0	0	11.698	11.698	-1.926		1.926			102	0	0	0	0	22.366	22.366	0		0			102	0	0	0	0	27.269	27.269	-1.621		1.621			102	0	0	0	0	19.884	19.884	-1.824		1.824
		103	0	0	0	0	13.624	13.624	-1.632		1.632			103	0	0	0	0	22.366	22.366	-0.739		0.739			103	0	0	0	0	28.89	28.89	-1.286		1.286			103	0	0	0	0	21.708	21.708	-1.861		1.861
		104	0	0	0	0	15.256	15.256	-0.746		0.746			104	0	0	0	0	23.105	23.105	0		0			104	0	0	0	0	30.176	30.176	-0.96		0.96			104	0	0	0	0	23.569	23.569	-2.783		2.783
		105	0	0	0	0	16.002	16.002	-1.452		1.452			105	0	0	0	0	23.105	23.105	-1.225		1.225			105	0	0	0	0	31.136	31.136	0		0			105	0	0	0	0	26.352	26.352	0		0
		106	0	0	0	0	17.454	17.454	-1.562		1.562			106	0	0	0	0	24.33	24.33	0		0			106	0	0	0	0	31.136	31.136	0		0			106	0	0	0	0	26.352	26.352	-1.378		1.378
		107	0	0	0	0	19.016	19.016	-2.625		2.625			107	0	0	0	0	24.33	24.33	32.888					107	0	0	0	0	31.136	31.136	0		0			107	0	0	0	0	27.73	27.73	0		0
		108	0	0	0	0	21.641	21.641	-0.803		0.803			108	0	0	0	0	8.558	-8.558	-4.074		4.074			108	0	0	0	0	31.136	31.136	-1.19		1.19			108	0	0	0	0	27.73	27.73	0		0
		109	0	0	0	0	22.444	22.444	-1.09		1.09			109	0	0	0	0	4.484	-4.484	-1.709		1.709			109	0	0	0	0	32.326	32.326	-0.656		0.656			109	0	0	0	0	27.73	27.73	-2.351		2.351
		110	0	0	0	0	23.534	23.534	-1.429		1.429			110	0	0	0	0	2.775	-2.775	-3.254		3.254			110	0	0	0	0	32.982	32.982	0		0			110	0	0	0	0	30.081	30.081	0		0
		111	0	0	0	0	24.963	24.963	-1.739		1.739			111	0	0	0	0	0.479	0.479	-2.328		2.328			111	0	0	0	0	32.982	32.982	32.936					111	0	0	0	0	30.081	30.081	26.762
		112	0	0	0	0	26.702	26.702	0		0			112	0	0	0	0	2.807	2.807	-3.245		3.245			112	0	0	0	0	0.046	0.046	-4.251		4.251			112	0	0	0	0	3.319	3.319	0		0
		113	0	0	0	0	26.702	26.702	-2.04		2.04			113	0	0	0	0	6.052	6.052	-1.416		1.416			113	0	0	0	0	4.297	4.297	0		0			113	0	0	0	0	3.319	3.319	-2.505		2.505
		114	0	0	0	0	28.742	28.742	0		0			114	0	0	0	0	7.468	7.468	-2.089		2.089			114	0	0	0	0	4.297	4.297	0		0			114	0	0	0	0	5.824	5.824	-2.735		2.735
		115	0	0	0	0	28.742	28.742	31.942					115	0	0	0	0	9.557	9.557	-1.777		1.777			115	0	0	0	0	4.297	4.297	-7.308		7.308			115	0	0	0	0	8.559	8.559	-2.543		2.543
		116	0	0	0	0	3.2	-3.2	-3.416		3.416			116	0	0	0	0	11.334	11.334	-2.802		2.802			116	0	0	0	0	11.605	11.605	0		0			116	0	0	0	0	11.102	11.102	-2.761		2.761
		117	0	0	0	0	0.216	0.216	0		0			117	0	0	0	0	14.136	14.136	-1.86		1.86			117	0	0	0	0	11.605	11.605	-1.803		1.803			117	0	0	0	0	13.863	13.863	-2.227		2.227
		118	0	0	0	0	0.216	0.216	-2.25		2.25			118	0	0	0	0	15.996	15.996	-2.285		2.285			118	0	0	0	0	13.408	13.408	-1.961		1.961			118	0	0	0	0	16.09	16.09	0		0
		119	0	0	0	0	2.466	2.466	-1.739		1.739			119	0	0	0	0	18.281	18.281	-1.228		1.228			119	0	0	0	0	15.369	15.369	0		0			119	0	0	0	0	16.09	16.09	0		0
		120	0	0	0	0	4.205	4.205	-1.998		1.998			120	0	0	0	0	19.509	19.509	-0.33		0.33			120	0	0	0	0	15.369	15.369	-1.918		1.918			120	0	0	0	0	16.09	16.09	0		0
		121	0	0	0	0	6.203	6.203	-2.295		2.295			121	0	0	0	0	19.839	19.839	-3.572		3.572			121	0	0	0	0	17.287	17.287	-1.83		1.83			121	0	0	0	0	16.09	16.09	0		0
		122	0	0	0	0	8.498	8.498	-1.625		1.625			122	0	0	0	0	23.411	23.411	0		0			122	0	0	0	0	19.117	19.117	0		0			122	0	0	0	0	16.09	16.09	-2.055		2.055
		123	0	0	0	0	10.123	10.123	-0.056		0.056			123	0	0	0	0	23.411	23.411	-2.105		2.105			123	0	0	0	0	19.117	19.117	-0.664		0.664			123	0	0	0	0	18.145	18.145	-2.249		2.249
		124	0	0	0	0	10.179	10.179	-1.337		1.337			124	0	0	0	0	25.516	25.516	0		0			124	0	0	0	0	19.781	19.781	-0.556		0.556			124	0	0	0	0	20.394	20.394	-2.602		2.602
		125	0	0	0	0	11.516	11.516	-1.373		1.373			125	0	0	0	0	25.516	25.516	-1.148		1.148			125	0	0	0	0	20.337	20.337	-1.744		1.744			125	0	0	0	0	22.996	22.996	-1.215		1.215
		126	0	0	0	0	12.889	12.889	-0.263		0.263			126	0	0	0	0	26.664	26.664	34.611					126	0	0	0	0	22.081	22.081	-1.711		1.711			126	0	0	0	0	24.211	24.211	-2.709		2.709
		127	0	0	0	0	13.152	13.152	-0.983		0.983			127	0	0	0	0	7.947	-7.947	-2.519		2.519			127	0	0	0	0	23.792	23.792	0		0			127	0	0	0	0	26.92	26.92	0		0
		128	0	0	0	0	14.135	14.135	-0.397		0.397			128	0	0	0	0	5.428	-5.428	-2.857		2.857			128	0	0	0	0	23.792	23.792	0		0			128	0	0	0	0	26.92	26.92	-1.987		1.987
		129	0	0	0	0	14.532	14.532	-1.601		1.601			129	0	0	0	0	2.571	-2.571	-4.707		4.707			129	0	0	0	0	23.792	23.792	-1.492		1.492			129	0	0	0	0	28.907	28.907	0		0
		130	0	0	0	0	16.133	16.133	-0.653		0.653			130	0	0	0	0	2.136	2.136	-3.276		3.276			130	0	0	0	0	25.284	25.284	0		0			130	0	0	0	0	28.907	28.907	18
		131	0	0	0	0	16.786	16.786	-1.774		1.774			131	0	0	0	0	5.412	5.412	-1.717		1.717			131	0	0	0	0	25.284	25.284	-1.144		1.144			131	0	0	0	0	10.907	10.907	-4.065		4.065
		132	0	0	0	0	18.56	18.56	-2.248		2.248			132	0	0	0	0	7.129	7.129	-2.506		2.506			132	0	0	0	0	26.428	26.428	0		0			132	0	0	0	0	14.972	14.972	-3.066		3.066
		133	0	0	0	0	20.808	20.808	-1.138		1.138			133	0	0	0	0	9.635	9.635	-2.138		2.138			133	0	0	0	0	26.428	26.428	-1.3		1.3			133	0	0	0	0	18.038	18.038	-2		2
		134	0	0	0	0	21.946	21.946	-1.126		1.126			134	0	0	0	0	11.773	11.773	-2.72		2.72			134	0	0	0	0	27.728	27.728	0		0			134	0	0	0	0	20.038	20.038	-2.57		2.57
		135	0	0	0	0	23.072	23.072	-1.237		1.237			135	0	0	0	0	14.493	14.493	-2.77		2.77			135	0	0	0	0	27.728	27.728	0		0			135	0	0	0	0	22.608	22.608	-1.653		1.653
		136	0	0	0	0	24.309	24.309	0		0			136	0	0	0	0	17.263	17.263	-1.969		1.969			136	0	0	0	0	27.728	27.728	-1.956		1.956			136	0	0	0	0	24.261	24.261	-1.979		1.979
		137	0	0	0	0	24.309	24.309	38.729					137	0	0	0	0	19.232	19.232	-2.018		2.018			137	0	0	0	0	29.684	29.684	0.214					137	0	0	0	0	26.24	26.24	0		0
		138	0	0	0	0	14.42	-14.42	0		0			138	0	0	0	0	21.25	21.25	0		0			138	0	0	0	0	29.47	29.47	-1.361		1.361			138	0	0	0	0	26.24	26.24	-2.276		2.276
		139	0	0	0	0	14.42	-14.42	-1.774		1.774			139	0	0	0	0	21.25	21.25	0		0			139	0	0	0	0	30.831	30.831	-0.809		0.809			139	0	0	0	0	28.516	28.516	0		0
		140	0	0	0	0	12.646	-12.646	-1.615		1.615			140	0	0	0	0	21.25	21.25	-1.45		1.45			140	0	0	0	0	31.64	31.64	0		0			140	0	0	0	0	28.516	28.516	-1.905		1.905
		141	0	0	0	0	11.031	-11.031	-3.332		3.332			141	0	0	0	0	22.7	22.7	-0.967		0.967			141	0	0	0	0	31.64	31.64	0		0			141	0	0	0	0	30.421	30.421	-2.428		2.428
		142	0	0	0	0	7.699	-7.699	-1.918		1.918			142	0	0	0	0	23.667	23.667	0		0			142	0	0	0	0	31.64	31.64	35.464					142	0	0	0	0	32.849	32.849	0		0
		143	0	0	0	0	5.781	-5.781	-2.06		2.06			143	0	0	0	0	23.667	23.667	-2.077		2.077			143	0	0	0	0	3.824	-3.824	2.171					143	0	0	0	0	32.849	32.849	27.719
		144	0	0	0	0	3.721	-3.721	-3.932		3.932			144	0	0	0	0	25.744	25.744	34.42					144	0	0	0	0	5.995	-5.995	-1.891		1.891			144	0	0	0	0	5.13	5.13	-2.091		2.091
		145	0	0	0	0	0.211	0.211	-1.719		1.719			145	0	0	0	0	8.676	-8.676	0		0			145	0	0	0	0	4.104	-4.104	-1.797		1.797			145	0	0	0	0	7.221	7.221	-2.947		2.947
		146	0	0	0	0	1.93	1.93	-1.806		1.806			146	0	0	0	0	8.676	-8.676	-2.953		2.953			146	0	0	0	0	2.307	-2.307	-2.807		2.807			146	0	0	0	0	10.168	10.168	-1.274		1.274
		147	0	0	0	0	3.736	3.736	-2.687		2.687			147	0	0	0	0	5.723	-5.723	-2.255		2.255			147	0	0	0	0	0.5	0.5	-0.14		0.14			147	0	0	0	0	11.442	11.442	-1.884		1.884
		148	0	0	0	0	6.423	6.423	-1.699		1.699			148	0	0	0	0	3.468	-3.468	-3.494		3.494			148	0	0	0	0	0.64	0.64	-2.389		2.389			148	0	0	0	0	13.326	13.326	-1.902		1.902
		149	0	0	0	0	8.122	8.122	-1.064		1.064			149	0	0	0	0	0.026	0.026	-2.45		2.45			149	0	0	0	0	3.029	3.029	-1.536		1.536			149	0	0	0	0	15.228	15.228	-2.108		2.108
		150	0	0	0	0	9.186	9.186	-2.043		2.043			150	0	0	0	0	2.476	2.476	-2.082		2.082			150	0	0	0	0	4.565	4.565	-1.742		1.742			150	0	0	0	0	17.336	17.336	-1.523		1.523
		151	0	0	0	0	11.229	11.229	-0.858		0.858			151	0	0	0	0	4.558	4.558	-2.214		2.214			151	0	0	0	0	6.307	6.307	-1.738		1.738			151	0	0	0	0	18.859	18.859	-1.183		1.183
		152	0	0	0	0	12.087	12.087	-1.29		1.29			152	0	0	0	0	6.772	6.772	-2.886		2.886			152	0	0	0	0	8.045	8.045	-2.283		2.283			152	0	0	0	0	20.042	20.042	-1.56		1.56
		153	0	0	0	0	13.377	13.377	-1.664		1.664			153	0	0	0	0	9.658	9.658	-0.996		0.996			153	0	0	0	0	10.328	10.328	-2.215		2.215			153	0	0	0	0	21.602	21.602	-2.588		2.588
		154	0	0	0	0	15.041	15.041	0		0			154	0	0	0	0	10.654	10.654	-2.046		2.046			154	0	0	0	0	12.543	12.543	-1.606		1.606			154	0	0	0	0	24.19	24.19	0		0
		155	0	0	0	0	15.041	15.041	0		0			155	0	0	0	0	12.7	12.7	-2.766		2.766			155	0	0	0	0	14.149	14.149	-1.988		1.988			155	0	0	0	0	24.19	24.19	-3.058		3.058
		156	0	0	0	0	15.041	15.041	-2.133		2.133			156	0	0	0	0	15.466	15.466	-0.962		0.962			156	0	0	0	0	16.137	16.137	-1.973		1.973			156	0	0	0	0	27.248	27.248	0		0
		157	0	0	0	0	17.174	17.174	0		0			157	0	0	0	0	16.428	16.428	-2.654		2.654			157	0	0	0	0	18.11	18.11	0		0			157	0	0	0	0	27.248	27.248	0		0
		158	0	0	0	0	17.174	17.174	0		0			158	0	0	0	0	19.082	19.082	-1.869		1.869			158	0	0	0	0	18.11	18.11	0		0			158	0	0	0	0	27.248	27.248	15.218
		159	0	0	0	0	17.174	17.174	0		0			159	0	0	0	0	20.951	20.951	0		0			159	0	0	0	0	18.11	18.11	-1.654		1.654			159	0	0	0	0	12.03	12.03	0		0
		160	0	0	0	0	17.174	17.174	0		0			160	0	0	0	0	20.951	20.951	-1.295		1.295			160	0	0	0	0	19.764	19.764	-1.13		1.13			160	0	0	0	0	12.03	12.03	-2.035		2.035
		161	0	0	0	0	17.174	17.174	29.379					161	0	0	0	0	22.246	22.246	0		0			161	0	0	0	0	20.894	20.894	-1.318		1.318			161	0	0	0	0	14.065	14.065	-1.908		1.908
		162	0	0	0	0	12.205	-12.205	-2.135		2.135			162	0	0	0	0	22.246	22.246	-2.348		2.348			162	0	0	0	0	22.212	22.212	-1.381		1.381			162	0	0	0	0	15.973	15.973	-1.763		1.763
		163	0	0	0	0	10.07	-10.07	-3.349		3.349			163	0	0	0	0	24.594	24.594	0		0			163	0	0	0	0	23.593	23.593	-1.545		1.545			163	0	0	0	0	17.736	17.736	-1.555		1.555
		164	0	0	0	0	6.721	-6.721	-1.394		1.394			164	0	0	0	0	24.594	24.594	0		0			164	0	0	0	0	25.138	25.138	-1.432		1.432			164	0	0	0	0	19.291	19.291	-2.498		2.498
		165	0	0	0	0	5.327	-5.327	-2.133		2.133			165	0	0	0	0	24.594	24.594	-0.975		0.975			165	0	0	0	0	26.57	26.57	-1.395		1.395			165	0	0	0	0	21.789	21.789	-1.484		1.484
		166	0	0	0	0	3.194	-3.194	-3.576		3.576			166	0	0	0	0	25.569	25.569	0		0			166	0	0	0	0	27.965	27.965	-0.999		0.999			166	0	0	0	0	23.273	23.273	-1.625		1.625
		167	0	0	0	0	0.382	0.382	-2.233		2.233			167	0	0	0	0	25.569	25.569	0		0			167	0	0	0	0	28.964	28.964	0		0			167	0	0	0	0	24.898	24.898	-2.11		2.11
		168	0	0	0	0	2.615	2.615	-1.167		1.167			168	0	0	0	0	25.569	25.569	0		0			168	0	0	0	0	28.964	28.964	-2.036		2.036			168	0	0	0	0	27.008	27.008	0		0
		169	0	0	0	0	3.782	3.782	-3.143		3.143			169	0	0	0	0	25.569	25.569	1.723					169	0	0	0	0	31	31	0		0			169	0	0	0	0	27.008	27.008	0.703
		170	0	0	0	0	6.925	6.925	-0.722		0.722			170	0	0	0	0	23.846	23.846	0		0			170	0	0	0	0	31	31	-0.951		0.951			170	0	0	0	0	26.305	26.305	0		0
		171	0	0	0	0	7.647	7.647	-1.431		1.431			171	0	0	0	0	23.846	23.846	34.034					171	0	0	0	0	31.951	31.951	0		0			171	0	0	0	0	26.305	26.305	-3.927		3.927
		172	0	0	0	0	9.078	9.078	-0.892		0.892			172	0	0	0	0	10.188	-10.188	-6.974		6.974			172	0	0	0	0	31.951	31.951	-1.559		1.559			172	0	0	0	0	30.232	30.232	0		0
		173	0	0	0	0	9.97	9.97	-1.582		1.582			173	0	0	0	0	3.214	-3.214	-21.51		21.51			173	0	0	0	0	33.51	33.51	0		0			173	0	0	0	0	30.232	30.232	0		0
		174	0	0	0	0	11.552	11.552	-1.561		1.561			174	0	0	0	0	18.296	18.296	7.415					174	0	0	0	0	33.51	33.51	0		0			174	0	0	0	0	30.232	30.232	30.183
		175	0	0	0	0	13.113	13.113	-0.903		0.903			175	0	0	0	0	10.881	10.881	-0.679		0.679			175	0	0	0	0	33.51	33.51	0		0			175	0	0	0	0	0.049	0.049	-3.764		3.764
		176	0	0	0	0	14.016	14.016	-0.97		0.97			176	0	0	0	0	11.56	11.56	-0.968		0.968			176	0	0	0	0	33.51	33.51	40.106					176	0	0	0	0	3.813	3.813	0		0
		177	0	0	0	0	14.986	14.986	0		0			177	0	0	0	0	12.528	12.528	0		0			177	0	0	0	0	6.596	-6.596	4.418					177	0	0	0	0	3.813	3.813	-1.601		1.601
		178	0	0	0	0	14.986	14.986	-1.967		1.967			178	0	0	0	0	12.528	12.528	0		0			178	0	0	0	0	11.014	-11.014	-1.439		1.439			178	0	0	0	0	5.414	5.414	-2.444		2.444
		179	0	0	0	0	16.953	16.953	-1.068		1.068			179	0	0	0	0	12.528	12.528	-3.105		3.105			179	0	0	0	0	9.575	-9.575	-2.169		2.169			179	0	0	0	0	7.858	7.858	-1.809		1.809
		180	0	0	0	0	18.021	18.021	0		0			180	0	0	0	0	15.633	15.633	-1.855		1.855			180	0	0	0	0	7.406	-7.406	-1.978		1.978			180	0	0	0	0	9.667	9.667	-2.661		2.661
		181	0	0	0	0	18.021	18.021	-1.656		1.656			181	0	0	0	0	17.488	17.488	4.416					181	0	0	0	0	5.428	-5.428	-2.009		2.009			181	0	0	0	0	12.328	12.328	-2.101		2.101
		182	0	0	0	0	19.677	19.677	0		0			182	0	0	0	0	13.072	13.072	-3.709		3.709			182	0	0	0	0	3.419	-3.419	-1.449		1.449			182	0	0	0	0	14.429	14.429	-1.523		1.523
		183	0	0	0	0	19.677	19.677						183	0	0	0	0	16.781	16.781						183	0	0	0	0	1.97	-1.97						183	0	0	0	0	15.952	15.952
[truncated: 87 more columns]

## Sheet: Hoja3
	Trial#1 - 2dpt
	(PC-ablated)
	4 frames per second
		Tamox 2dpt	ser01						degrees rot	# saccades	speed rotat	speed average		Tamox 2dpt	ser03						degrees rot	# saccades	speed rotat	speed average		Tamox 2dpt	ser05						degrees rot	# saccades	speed rotat	speed average		Tamox 2dpt	ser07					degrees rot	# saccades	speed rotat	speed average		Tamox 2dpt
		1	0	0	0	0	13.377	13.377	-1.607	6	1.607	1.13892		1	0	0	0	0	25.521	25.521	-1.327	1	1.327	0.23491		1	0	0	0	0	18.8	18.8	-1.916	7	1.916	1.43436		1	0	0	0	0	0.208	-2.621	0	2.621	0.376355		1
		2	0	0	0	0	14.984	14.984	-0.747		0.747			2	0	0	0	0	26.848	26.848	0		0			2	0	0	0	0	20.716	20.716	-1.48		1.48			2	0	0	0	0	2.829	0		0			2
		3	0	0	0	0	15.731	15.731	-1.033		1.033			3	0	0	0	0	26.848	26.848	0		0			3	0	0	0	0	22.196	22.196	0		0			3	0	0	0	0	2.829	2.713					3
		4	0	0	0	0	16.764	16.764	-0.87		0.87			4	0	0	0	0	26.848	26.848	-1.395		1.395			4	0	0	0	0	22.196	22.196	21.916					4	0	0	0	0	0.116	-2.604		2.604			4
		5	0	0	0	0	17.634	17.634	0		0			5	0	0	0	0	28.243	28.243	0		0			5	0	0	0	0	0.28	0.28	-2.949		2.949			5	0	0	0	0	2.72	0		0			5
		6	0	0	0	0	17.634	17.634	-2.106		2.106			6	0	0	0	0	28.243	28.243	-1.184		1.184			6	0	0	0	0	3.229	3.229	-3.265		3.265			6	0	0	0	0	2.72	0.022					6
		7	0	0	0	0	19.74	19.74	0		0			7	0	0	0	0	29.427	29.427	0		0			7	0	0	0	0	6.494	6.494	-2.605		2.605			7	0	0	0	0	2.698	0		0			7
		8	0	0	0	0	19.74	19.74	0		0			8	0	0	0	0	29.427	29.427	-2.596		2.596			8	0	0	0	0	9.099	9.099	-2.768		2.768			8	0	0	0	0	2.698	0		0			8
		9	0	0	0	0	19.74	19.74	-0.995		0.995			9	0	0	0	0	32.023	32.023	0		0			9	0	0	0	0	11.867	11.867	-2.023		2.023			9	0	0	0	0	2.698	0		0			9
		10	0	0	0	0	20.735	20.735	-2.578		2.578			10	0	0	0	0	32.023	32.023	0		0			10	0	0	0	0	13.89	13.89	-2.175		2.175			10	0	0	0	0	2.698	0		0			10
		11	0	0	0	0	23.313	23.313	0		0			11	0	0	0	0	32.023	32.023	0		0			11	0	0	0	0	16.065	16.065	-3.041		3.041			11	0	0	0	0	2.698	0		0			11
		12	0	0	0	0	23.313	23.313	-1.649		1.649			12	0	0	0	0	32.023	32.023	0		0			12	0	0	0	0	19.106	19.106	-2.87		2.87			12	0	0	0	0	2.698	-0.938		0.938			12
		13	0	0	0	0	24.962	24.962	0.458					13	0	0	0	0	32.023	32.023	0		0			13	0	0	0	0	21.976	21.976	-2.841		2.841			13	0	0	0	0	3.636	0		0			13
		14	0	0	0	0	24.504	24.504	-0.483		0.483			14	0	0	0	0	32.023	32.023	0		0			14	0	0	0	0	24.817	24.817	-1.759		1.759			14	0	0	0	0	3.636	-1.514		1.514			14
		15	0	0	0	0	24.987	24.987	30.219					15	0	0	0	0	32.023	32.023	0		0			15	0	0	0	0	26.576	26.576	-2.82		2.82			15	0	0	0	0	5.15	0		0			15
		16	0	0	0	0	5.232	-5.232	6.398					16	0	0	0	0	32.023	32.023	0		0			16	0	0	0	0	29.396	29.396	-1.061		1.061			16	0	0	0	0	5.15	-2.756		2.756			16
		17	0	0	0	0	11.63	-11.63	-3.701		3.701			17	0	0	0	0	32.023	32.023	0		0			17	0	0	0	0	30.457	30.457	36.631					17	0	0	0	0	7.906	-2.231		2.231			17
		18	0	0	0	0	7.929	-7.929	-3.677		3.677			18	0	0	0	0	32.023	32.023	33.435					18	0	0	0	0	6.174	-6.174	-2.32		2.32			18	0	0	0	0	10.137	0		0			18
		19	0	0	0	0	4.252	-4.252	-1.254		1.254			19	0	0	0	0	1.412	-1.412	-4.354		4.354			19	0	0	0	0	3.854	-3.854	-1.923		1.923			19	0	0	0	0	10.137	0		0			19
		20	0	0	0	0	2.998	-2.998	-3.081		3.081			20	0	0	0	0	2.942	2.942	-3.856		3.856			20	0	0	0	0	1.931	-1.931	-2.239		2.239			20	0	0	0	0	10.137	0		0			20
		21	0	0	0	0	0.083	0.083	-3.023		3.023			21	0	0	0	0	6.798	6.798	-3.525		3.525			21	0	0	0	0	0.308	0.308	-2.299		2.299			21	0	0	0	0	10.137	0		0			21
		22	0	0	0	0	3.106	3.106	-2.139		2.139			22	0	0	0	0	10.323	10.323	0		0			22	0	0	0	0	2.607	2.607	-2.966		2.966			22	0	0	0	0	10.137	3.821					22
		23	0	0	0	0	5.245	5.245	-1.099		1.099			23	0	0	0	0	10.323	10.323	-2.568		2.568			23	0	0	0	0	5.573	5.573	-3.768		3.768			23	0	0	0	0	6.316	-0.699		0.699			23
		24	0	0	0	0	6.344	6.344	-1.397		1.397			24	0	0	0	0	12.891	12.891	-1.152		1.152			24	0	0	0	0	9.341	9.341	-2.29		2.29			24	0	0	0	0	7.015	0		0			24
		25	0	0	0	0	7.741	7.741	-1.017		1.017			25	0	0	0	0	14.043	14.043	-1.89		1.89			25	0	0	0	0	11.631	11.631	-2.445		2.445			25	0	0	0	0	7.015	0		0			25
		26	0	0	0	0	8.758	8.758	-1.789		1.789			26	0	0	0	0	15.933	15.933	0		0			26	0	0	0	0	14.076	14.076	-1.96		1.96			26	0	0	0	0	7.015	-2.823		2.823			26
		27	0	0	0	0	10.547	10.547	-0.847		0.847			27	0	0	0	0	15.933	15.933	-1.575		1.575			27	0	0	0	0	16.036	16.036	7.353					27	0	0	0	0	9.838	0		0			27
		28	0	0	0	0	11.394	11.394	-2.369		2.369			28	0	0	0	0	17.508	17.508	-1.211		1.211			28	0	0	0	0	8.683	8.683	-4.516		4.516			28	0	0	0	0	9.838	0		0			28
		29	0	0	0	0	13.763	13.763	0		0			29	0	0	0	0	18.719	18.719	0		0			29	0	0	0	0	13.199	13.199	-3.873		3.873			29	0	0	0	0	9.838	0		0			29
		30	0	0	0	0	13.763	13.763	-2.799		2.799			30	0	0	0	0	18.719	18.719	-1.132		1.132			30	0	0	0	0	17.072	17.072	-2.271		2.271			30	0	0	0	0	9.838	0		0			30
		31	0	0	0	0	16.562	16.562	0		0			31	0	0	0	0	19.851	19.851	0		0			31	0	0	0	0	19.343	19.343	-2.398		2.398			31	0	0	0	0	9.838	0		0			31
		32	0	0	0	0	16.562	16.562	-1.271		1.271			32	0	0	0	0	19.851	19.851	-2.872		2.872			32	0	0	0	0	21.741	21.741	-1.304		1.304			32	0	0	0	0	9.838	0		0			32
		33	0	0	0	0	17.833	17.833	-0.767		0.767			33	0	0	0	0	22.723	22.723	-1.199		1.199			33	0	0	0	0	23.045	23.045	-2.062		2.062			33	0	0	0	0	9.838	0		0			33
		34	0	0	0	0	18.6	18.6	-1.306		1.306			34	0	0	0	0	23.922	23.922	0		0			34	0	0	0	0	25.107	25.107	-2.272		2.272			34	0	0	0	0	9.838	0		0			34
		35	0	0	0	0	19.906	19.906	-1.251		1.251			35	0	0	0	0	23.922	23.922	-1.228		1.228			35	0	0	0	0	27.379	27.379	-2.021		2.021			35	0	0	0	0	9.838	0		0			35
		36	0	0	0	0	21.157	21.157	-0.7		0.7			36	0	0	0	0	25.15	25.15	0		0			36	0	0	0	0	29.4	29.4	0		0			36	0	0	0	0	9.838	0		0			36
		37	0	0	0	0	21.857	21.857	0		0			37	0	0	0	0	25.15	25.15	0		0			37	0	0	0	0	29.4	29.4	0		0			37	0	0	0	0	9.838	0		0			37
		38	0	0	0	0	21.857	21.857	-1.869		1.869			38	0	0	0	0	25.15	25.15	0		0			38	0	0	0	0	29.4	29.4	32.434					38	0	0	0	0	9.838	0		0			38
		39	0	0	0	0	23.726	23.726	-2.023		2.023			39	0	0	0	0	25.15	25.15	-1.412		1.412			39	0	0	0	0	3.034	-3.034	-3.163		3.163			39	0	0	0	0	9.838	0		0			39
		40	0	0	0	0	25.749	25.749	0		0			40	0	0	0	0	26.562	26.562	0		0			40	0	0	0	0	0.129	0.129	-4.108		4.108			40	0	0	0	0	9.838	0		0			40
		41	0	0	0	0	25.749	25.749	-1.454		1.454			41	0	0	0	0	26.562	26.562	0		0			41	0	0	0	0	4.237	4.237	-1.384		1.384			41	0	0	0	0	9.838	0		0			41
		42	0	0	0	0	27.203	27.203	0		0			42	0	0	0	0	26.562	26.562	-1.233		1.233			42	0	0	0	0	5.621	5.621	-1.526		1.526			42	0	0	0	0	9.838	0		0			42
		43	0	0	0	0	27.203	27.203	0		0			43	0	0	0	0	27.795	27.795	0		0			43	0	0	0	0	7.147	7.147	-1.873		1.873			43	0	0	0	0	9.838	0		0			43
		44	0	0	0	0	27.203	27.203	-1.377		1.377			44	0	0	0	0	27.795	27.795	0		0			44	0	0	0	0	9.02	9.02	-1.958		1.958			44	0	0	0	0	9.838	0		0			44
		45	0	0	0	0	28.58	28.58	0		0			45	0	0	0	0	27.795	27.795	0		0			45	0	0	0	0	10.978	10.978	-2.628		2.628			45	0	0	0	0	9.838	0		0			45
		46	0	0	0	0	28.58	28.58	0		0			46	0	0	0	0	27.795	27.795	0		0			46	0	0	0	0	13.606	13.606	-2.537		2.537			46	0	0	0	0	9.838	0		0			46
		47	0	0	0	0	28.58	28.58	31.395					47	0	0	0	0	27.795	27.795	-2.53		2.53			47	0	0	0	0	16.143	16.143	0		0			47	0	0	0	0	9.838	0		0			47
		48	0	0	0	0	2.815	-2.815	-4.129		4.129			48	0	0	0	0	30.325	30.325	0		0			48	0	0	0	0	16.143	16.143	-1.859		1.859			48	0	0	0	0	9.838	0		0			48
		49	0	0	0	0	1.314	1.314	-0.884		0.884			49	0	0	0	0	30.325	30.325	0		0			49	0	0	0	0	18.002	18.002	-1.724		1.724			49	0	0	0	0	9.838	0		0			49
		50	0	0	0	0	2.198	2.198	-1.601		1.601			50	0	0	0	0	30.325	30.325	0		0			50	0	0	0	0	19.726	19.726	-1.826		1.826			50	0	0	0	0	9.838	0		0			50
		51	0	0	0	0	3.799	3.799	-2.685		2.685			51	0	0	0	0	30.325	30.325	0		0			51	0	0	0	0	21.552	21.552	-1.546		1.546			51	0	0	0	0	9.838	0		0			51
		52	0	0	0	0	6.484	6.484	-2.083		2.083			52	0	0	0	0	30.325	30.325	0		0			52	0	0	0	0	23.098	23.098	-1.124		1.124			52	0	0	0	0	9.838	0		0			52
		53	0	0	0	0	8.567	8.567	-2.087		2.087			53	0	0	0	0	30.325	30.325	0		0			53	0	0	0	0	24.222	24.222	-2.51		2.51			53	0	0	0	0	9.838	3.689					53
		54	0	0	0	0	10.654	10.654	-1.009		1.009			54	0	0	0	0	30.325	30.325	-0.917		0.917			54	0	0	0	0	26.732	26.732	-2.486		2.486			54	0	0	0	0	6.149	-1.393		1.393			54
		55	0	0	0	0	11.663	11.663	-1.656		1.656			55	0	0	0	0	31.242	31.242	0		0			55	0	0	0	0	29.218	29.218	6.131					55	0	0	0	0	7.542	-1.253		1.253			55
		56	0	0	0	0	13.319	13.319	-1.524		1.524			56	0	0	0	0	31.242	31.242	0		0			56	0	0	0	0	23.087	23.087	-2.67		2.67			56	0	0	0	0	8.795	0		0			56
		57	0	0	0	0	14.843	14.843	-0.578		0.578			57	0	0	0	0	31.242	31.242	0		0			57	0	0	0	0	25.757	25.757	-3.325		3.325			57	0	0	0	0	8.795	0		0			57
		58	0	0	0	0	15.421	15.421	-1.09		1.09			58	0	0	0	0	31.242	31.242	0		0			58	0	0	0	0	29.082	29.082	-0.923		0.923			58	0	0	0	0	8.795	8.494					58
		59	0	0	0	0	16.511	16.511	-1.55		1.55			59	0	0	0	0	31.242	31.242	0		0			59	0	0	0	0	30.005	30.005	0		0			59	0	0	0	0	0.301	-1.313		1.313			59
		60	0	0	0	0	18.061	18.061	-0.831		0.831			60	0	0	0	0	31.242	31.242	0		0			60	0	0	0	0	30.005	30.005	-3.372		3.372			60	0	0	0	0	1.614	-2.163		2.163			60
		61	0	0	0	0	18.892	18.892	-1.096		1.096			61	0	0	0	0	31.242	31.242	0		0			61	0	0	0	0	33.377	33.377	0		0			61	0	0	0	0	3.777	-2.426		2.426			61
		62	0	0	0	0	19.988	19.988	-0.857		0.857			62	0	0	0	0	31.242	31.242	0		0			62	0	0	0	0	33.377	33.377	0		0			62	0	0	0	0	6.203	0		0			62
		63	0	0	0	0	20.845	20.845	-1.638		1.638			63	0	0	0	0	31.242	31.242	0		0			63	0	0	0	0	33.377	33.377	7.539					63	0	0	0	0	6.203	0		0			63
		64	0	0	0	0	22.483	22.483	-0.945		0.945			64	0	0	0	0	31.242	31.242	0		0			64	0	0	0	0	25.838	25.838	0		0			64	0	0	0	0	6.203	0		0			64
		65	0	0	0	0	23.428	23.428	0		0			65	0	0	0	0	31.242	31.242	0		0			65	0	0	0	0	25.838	25.838	0		0			65	0	0	0	0	6.203	0		0			65
		66	0	0	0	0	23.428	23.428	0		0			66	0	0	0	0	31.242	31.242	0		0			66	0	0	0	0	25.838	25.838	25.482					66	0	0	0	0	6.203	0		0			66
		67	0	0	0	0	23.428	23.428	0		0			67	0	0	0	0	31.242	31.242	0		0			67	0	0	0	0	0.356	0.356	0		0			67	0	0	0	0	6.203	0		0			67
		68	0	0	0	0	23.428	23.428	29.214					68	0	0	0	0	31.242	31.242	0		0			68	0	0	0	0	0.356	0.356	0.084					68	0	0	0	0	6.203	0		0			68
		69	0	0	0	0	5.786	-5.786	-2.686		2.686			69	0	0	0	0	31.242	31.242	0		0			69	0	0	0	0	0.272	0.272	-2.021		2.021			69	0	0	0	0	6.203	6.128					69
		70	0	0	0	0	3.1	-3.1	-4.318		4.318			70	0	0	0	0	31.242	31.242	0		0			70	0	0	0	0	2.293	2.293	0		0			70	0	0	0	0	0.075	0		0			70
		71	0	0	0	0	1.218	1.218	-1.242		1.242			71	0	0	0	0	31.242	31.242	0		0			71	0	0	0	0	2.293	2.293	0		0			71	0	0	0	0	0.075	-0.897		0.897			71
		72	0	0	0	0	2.46	2.46	-4.002		4.002			72	0	0	0	0	31.242	31.242	0		0			72	0	0	0	0	2.293	2.293	0		0			72	0	0	0	0	0.972	0		0			72
		73	0	0	0	0	6.462	6.462	-2.898		2.898			73	0	0	0	0	31.242	31.242	0		0			73	0	0	0	0	2.293	2.293	-2.086		2.086			73	0	0	0	0	0.972	-1.176		1.176			73
		74	0	0	0	0	9.36	9.36	-1.458		1.458			74	0	0	0	0	31.242	31.242	0		0			74	0	0	0	0	4.379	4.379	0		0			74	0	0	0	0	2.148	-2.485		2.485			74
		75	0	0	0	0	10.818	10.818	-1.6		1.6			75	0	0	0	0	31.242	31.242	0		0			75	0	0	0	0	4.379	4.379	0		0			75	0	0	0	0	4.633	0		0			75
		76	0	0	0	0	12.418	12.418	-1.008		1.008			76	0	0	0	0	31.242	31.242	0		0			76	0	0	0	0	4.379	4.379	-2.06		2.06			76	0	0	0	0	4.633	-1.931		1.931			76
		77	0	0	0	0	13.426	13.426	-1.388		1.388			77	0	0	0	0	31.242	31.242	0		0			77	0	0	0	0	6.439	6.439	0		0			77	0	0	0	0	6.564	0		0			77
		78	0	0	0	0	14.814	14.814	-1.422		1.422			78	0	0	0	0	31.242	31.242	0		0			78	0	0	0	0	6.439	6.439	-1.274		1.274			78	0	0	0	0	6.564	0		0			78
		79	0	0	0	0	16.236	16.236	-0.412		0.412			79	0	0	0	0	31.242	31.242	0		0			79	0	0	0	0	7.713	7.713	0		0			79	0	0	0	0	6.564	0		0			79
		80	0	0	0	0	16.648	16.648	-2.171		2.171			80	0	0	0	0	31.242	31.242	0		0			80	0	0	0	0	7.713	7.713	-1.493		1.493			80	0	0	0	0	6.564	0		0			80
		81	0	0	0	0	18.819	18.819	0		0			81	0	0	0	0	31.242	31.242	0		0			81	0	0	0	0	9.206	9.206	0		0			81	0	0	0	0	6.564	0		0			81
		82	0	0	0	0	18.819	18.819	0		0			82	0	0	0	0	31.242	31.242	3.817					82	0	0	0	0	9.206	9.206	0		0			82	0	0	0	0	6.564	-1.634		1.634			82
		83	0	0	0	0	18.819	18.819	-1.989		1.989			83	0	0	0	0	27.425	27.425	-1.312		1.312			83	0	0	0	0	9.206	9.206	0		0			83	0	0	0	0	8.198	0		0			83
		84	0	0	0	0	20.808	20.808	0		0			84	0	0	0	0	28.737	28.737	0		0			84	0	0	0	0	9.206	9.206	-2.04		2.04			84	0	0	0	0	8.198	0		0			84
		85	0	0	0	0	20.808	20.808	-1.694		1.694			85	0	0	0	0	28.737	28.737	0		0			85	0	0	0	0	11.246	11.246	0		0			85	0	0	0	0	8.198	-2		2			85
		86	0	0	0	0	22.502	22.502	0		0			86	0	0	0	0	28.737	28.737	0		0			86	0	0	0	0	11.246	11.246	0		0			86	0	0	0	0	10.198	0		0			86
		87	0	0	0	0	22.502	22.502	0		0			87	0	0	0	0	28.737	28.737	0		0			87	0	0	0	0	11.246	11.246	0		0			87	0	0	0	0	10.198	0		0			87
		88	0	0	0	0	22.502	22.502	0		0			88	0	0	0	0	28.737	28.737	0		0			88	0	0	0	0	11.246	11.246	0		0			88	0	0	0	0	10.198	0		0			88
		89	0	0	0	0	22.502	22.502	-0.831		0.831			89	0	0	0	0	28.737	28.737	0		0			89	0	0	0	0	11.246	11.246	-2.585		2.585			89	0	0	0	0	10.198	0		0			89
		90	0	0	0	0	23.333	23.333	0		0			90	0	0	0	0	28.737	28.737	0		0			90	0	0	0	0	13.831	13.831	0		0			90	0	0	0	0	10.198	0		0			90
		91	0	0	0	0	23.333	23.333	0		0			91	0	0	0	0	28.737	28.737	0		0			91	0	0	0	0	13.831	13.831	-2.202		2.202			91	0	0	0	0	10.198	0		0			91
		92	0	0	0	0	23.333	23.333	0		0			92	0	0	0	0	28.737	28.737	0		0			92	0	0	0	0	16.033	16.033	0		0			92	0	0	0	0	10.198	0		0			92
		93	0	0	0	0	23.333	23.333	0		0			93	0	0	0	0	28.737	28.737	0		0			93	0	0	0	0	16.033	16.033	-2.086		2.086			93	0	0	0	0	10.198	0		0			93
		94	0	0	0	0	23.333	23.333	-1.749		1.749			94	0	0	0	0	28.737	28.737	1.691					94	0	0	0	0	18.119	18.119	0		0			94	0	0	0	0	10.198	0		0			94
		95	0	0	0	0	25.082	25.082	0		0			95	0	0	0	0	27.046	27.046	0		0			95	0	0	0	0	18.119	18.119	-2.307		2.307			95	0	0	0	0	10.198	0		0			95
		96	0	0	0	0	25.082	25.082	0		0			96	0	0	0	0	27.046	27.046	0		0			96	0	0	0	0	20.426	20.426	0		0			96	0	0	0	0	10.198	0		0			96
		97	0	0	0	0	25.082	25.082	-1.118		1.118			97	0	0	0	0	27.046	27.046	0		0			97	0	0	0	0	20.426	20.426	-0.746		0.746			97	0	0	0	0	10.198	0		0			97
		98	0	0	0	0	26.2	26.2	0		0			98	0	0	0	0	27.046	27.046	0		0			98	0	0	0	0	21.172	21.172	-0.432		0.432			98	0	0	0	0	10.198	0		0			98
		99	0	0	0	0	26.2	26.2	0		0			99	0	0	0	0	27.046	27.046	0		0			99	0	0	0	0	21.604	21.604	-3.308		3.308			99	0	0	0	0	10.198	7.593					99
		100	0	0	0	0	26.2	26.2	0		0			100	0	0	0	0	27.046	27.046	0		0			100	0	0	0	0	24.912	24.912	40.811					100	0	0	0	0	2.605	-2.799		2.799			100
		101	0	0	0	0	26.2	26.2	33.65					101	0	0	0	0	27.046	27.046	0		0			101	0	0	0	0	15.899	-15.899	2.378					101	0	0	0	0	5.404	-1.966		1.966			101
		102	0	0	0	0	7.45	-7.45	0		0			102	0	0	0	0	27.046	27.046	-1.346		1.346			102	0	0	0	0	18.277	-18.277	-2.534		2.534			102	0	0	0	0	7.37	0		0			102
		103	0	0	0	0	7.45	-7.45	-3.909		3.909			103	0	0	0	0	28.392	28.392	0		0			103	0	0	0	0	15.743	-15.743	-2.531		2.531			103	0	0	0	0	7.37	6.201					103
		104	0	0	0	0	3.541	-3.541	-4.28		4.28			104	0	0	0	0	28.392	28.392	0		0			104	0	0	0	0	13.212	-13.212	-2.162		2.162			104	0	0	0	0	1.169	-2.341		2.341			104
		105	0	0	0	0	0.739	0.739	-0.462		0.462			105	0	0	0	0	28.392	28.392	0		0			105	0	0	0	0	11.05	-11.05	-2.881		2.881			105	0	0	0	0	3.51	0		0			105
		106	0	0	0	0	1.201	1.201	-2.664		2.664			106	0	0	0	0	28.392	28.392	0		0			106	0	0	0	0	8.169	-8.169	-2.378		2.378			106	0	0	0	0	3.51	0.966					106
		107	0	0	0	0	3.865	3.865	-2.162		2.162			107	0	0	0	0	28.392	28.392	0		0			107	0	0	0	0	5.791	-5.791	-2.083		2.083			107	0	0	0	0	2.544	-2.246		2.246			107
		108	0	0	0	0	6.027	6.027	-0.884		0.884			108	0	0	0	0	28.392	28.392	0		0			108	0	0	0	0	3.708	-3.708	-4.404		4.404			108	0	0	0	0	4.79	0		0			108
		109	0	0	0	0	6.911	6.911	-1.027		1.027			109	0	0	0	0	28.392	28.392	0		0			109	0	0	0	0	0.696	0.696	-2.136		2.136			109	0	0	0	0	4.79	0		0			109
		110	0	0	0	0	7.938	7.938	-1.454		1.454			110	0	0	0	0	28.392	28.392	1.721					110	0	0	0	0	2.832	2.832	-0.751		0.751			110	0	0	0	0	4.79	0		0			110
		111	0	0	0	0	9.392	9.392	-1.871		1.871			111	0	0	0	0	26.671	26.671	0		0			111	0	0	0	0	3.583	3.583	-1.6		1.6			111	0	0	0	0	4.79	0		0			111
		112	0	0	0	0	11.263	11.263	-0.677		0.677			112	0	0	0	0	26.671	26.671	0		0			112	0	0	0	0	5.183	5.183	-1.97		1.97			112	0	0	0	0	4.79	0		0			112
		113	0	0	0	0	11.94	11.94	-1.407		1.407			113	0	0	0	0	26.671	26.671	0		0			113	0	0	0	0	7.153	7.153	-1.855		1.855			113	0	0	0	0	4.79	-2.221		2.221			113
		114	0	0	0	0	13.347	13.347	-0.781		0.781			114	0	0	0	0	26.671	26.671	0		0			114	0	0	0	0	9.008	9.008	0		0			114	0	0	0	0	7.011	0		0			114
		115	0	0	0	0	14.128	14.128	0		0			115	0	0	0	0	26.671	26.671	0		0			115	0	0	0	0	9.008	9.008	-2.323		2.323			115	0	0	0	0	7.011	0		0			115
		116	0	0	0	0	14.128	14.128	-0.849		0.849			116	0	0	0	0	26.671	26.671	0		0			116	0	0	0	0	11.331	11.331	0		0			116	0	0	0	0	7.011	0		0			116
		117	0	0	0	0	14.977	14.977	-1.211		1.211			117	0	0	0	0	26.671	26.671	0		0			117	0	0	0	0	11.331	11.331	-2.175		2.175			117	0	0	0	0	7.011	0		0			117
		118	0	0	0	0	16.188	16.188	-0.747		0.747			118	0	0	0	0	26.671	26.671	0		0			118	0	0	0	0	13.506	13.506	0		0			118	0	0	0	0	7.011	-2.005		2.005			118
		119	0	0	0	0	16.935	16.935	0		0			119	0	0	0	0	26.671	26.671	0		0			119	0	0	0	0	13.506	13.506	-1.732		1.732			119	0	0	0	0	9.016	0		0			119
		120	0	0	0	0	16.935	16.935	-3.521		3.521			120	0	0	0	0	26.671	26.671	0		0			120	0	0	0	0	15.238	15.238	0		0			120	0	0	0	0	9.016	0		0			120
		121	0	0	0	0	20.456	20.456	0		0			121	0	0	0	0	26.671	26.671	0		0			121	0	0	0	0	15.238	15.238	0		0			121	0	0	0	0	9.016	0		0			121
		122	0	0	0	0	20.456	20.456	0		0			122	0	0	0	0	26.671	26.671	0		0			122	0	0	0	0	15.238	15.238	-1.616		1.616			122	0	0	0	0	9.016	0		0			122
		123	0	0	0	0	20.456	20.456	0		0			123	0	0	0	0	26.671	26.671	0		0			123	0	0	0	0	16.854	16.854	0		0			123	0	0	0	0	9.016	0		0			123
		124	0	0	0	0	20.456	20.456	0		0			124	0	0	0	0	26.671	26.671	0		0			124	0	0	0	0	16.854	16.854	0		0			124	0	0	0	0	9.016	0		0			124
		125	0	0	0	0	20.456	20.456	-0.939		0.939			125	0	0	0	0	26.671	26.671	0		0			125	0	0	0	0	16.854	16.854	-1.838		1.838			125	0	0	0	0	9.016	0		0			125
		126	0	0	0	0	21.395	21.395	0		0			126	0	0	0	0	26.671	26.671	0		0			126	0	0	0	0	18.692	18.692	0		0			126	0	0	0	0	9.016	0		0			126
		127	0	0	0	0	21.395	21.395	0		0			127	0	0	0	0	26.671	26.671	0		0			127	0	0	0	0	18.692	18.692	-3.135		3.135			127	0	0	0	0	9.016	0		0			127
		128	0	0	0	0	21.395	21.395	-1.111		1.111			128	0	0	0	0	26.671	26.671	0		0			128	0	0	0	0	21.827	21.827	0		0			128	0	0	0	0	9.016	0		0			128
		129	0	0	0	0	22.506	22.506	0		0			129	0	0	0	0	26.671	26.671	0		0			129	0	0	0	0	21.827	21.827	0		0			129	0	0	0	0	9.016	0		0			129
		130	0	0	0	0	22.506	22.506	0		0			130	0	0	0	0	26.671	26.671	0		0			130	0	0	0	0	21.827	21.827	0		0			130	0	0	0	0	9.016	0		0			130
		131	0	0	0	0	22.506	22.506	-1.118		1.118			131	0	0	0	0	26.671	26.671	0		0			131	0	0	0	0	21.827	21.827	0		0			131	0	0	0	0	9.016	0		0			131
		132	0	0	0	0	23.624	23.624	0		0			132	0	0	0	0	26.671	26.671	0		0			132	0	0	0	0	21.827	21.827	0		0			132	0	0	0	0	9.016	0		0			132
		133	0	0	0	0	23.624	23.624	0		0			133	0	0	0	0	26.671	26.671	0		0			133	0	0	0	0	21.827	21.827	38.033					133	0	0	0	0	9.016	0		0			133
		134	0	0	0	0	23.624	23.624	27.042					134	0	0	0	0	26.671	26.671	0		0			134	0	0	0	0	16.206	-16.206	0		0			134	0	0	0	0	9.016	3.014					134
		135	0	0	0	0	3.418	-3.418	8.379					135	0	0	0	0	26.671	26.671	0		0			135	0	0	0	0	16.206	-16.206	-2.56		2.56			135	0	0	0	0	6.002	0		0			135
		136	0	0	0	0	11.797	-11.797	-3.017		3.017			136	0	0	0	0	26.671	26.671	0		0			136	0	0	0	0	13.646	-13.646	-3.611		3.611			136	0	0	0	0	6.002	-1.952		1.952			136
		137	0	0	0	0	8.78	-8.78	-2.115		2.115			137	0	0	0	0	26.671	26.671	0		0			137	0	0	0	0	10.035	-10.035	-1.791		1.791			137	0	0	0	0	7.954	0		0			137
		138	0	0	0	0	6.665	-6.665	-2.095		2.095			138	0	0	0	0	26.671	26.671	0		0			138	0	0	0	0	8.244	-8.244	-2.209		2.209			138	0	0	0	0	7.954	0		0			138
		139	0	0	0	0	4.57	-4.57	-1.917		1.917			139	0	0	0	0	26.671	26.671	0		0			139	0	0	0	0	6.035	-6.035	-2.494		2.494			139	0	0	0	0	7.954	4.878					139
		140	0	0	0	0	2.653	-2.653	-1.485		1.485			140	0	0	0	0	26.671	26.671	0		0			140	0	0	0	0	3.541	-3.541	-4.075		4.075			140	0	0	0	0	3.076	-2.689		2.689			140
		141	0	0	0	0	1.168	-1.168	-1.168		1.168			141	0	0	0	0	26.671	26.671	0		0			141	0	0	0	0	0.534	0.534	-1.664		1.664			141	0	0	0	0	5.765	0		0			141
		142	0	0	0	0	0	0	-2.691		2.691			142	0	0	0	0	26.671	26.671	0		0			142	0	0	0	0	2.198	2.198	-1.942		1.942			142	0	0	0	0	5.765	-1.562		1.562			142
		143	0	0	0	0	2.691	2.691	-1.353		1.353			143	0	0	0	0	26.671	26.671	0		0			143	0	0	0	0	4.14	4.14	-1.89		1.89			143	0	0	0	0	7.327	0		0			143
		144	0	0	0	0	4.044	4.044	-1.265		1.265			144	0	0	0	0	26.671	26.671	0		0			144	0	0	0	0	6.03	6.03	-1.494		1.494			144	0	0	0	0	7.327	0		0			144
		145	0	0	0	0	5.309	5.309	-1.632		1.632			145	0	0	0	0	26.671	26.671	0		0			145	0	0	0	0	7.524	7.524	-1.407		1.407			145	0	0	0	0	7.327	0		0			145
		146	0	0	0	0	6.941	6.941	-0.876		0.876			146	0	0	0	0	26.671	26.671	0		0			146	0	0	0	0	8.931	8.931	0		0			146	0	0	0	0	7.327	0		0			146
		147	0	0	0	0	7.817	7.817	-1.459		1.459			147	0	0	0	0	26.671	26.671	0		0			147	0	0	0	0	8.931	8.931	0		0			147	0	0	0	0	7.327	2.592					147
		148	0	0	0	0	9.276	9.276	-2.126		2.126			148	0	0	0	0	26.671	26.671	0		0			148	0	0	0	0	8.931	8.931	-2.17		2.17			148	0	0	0	0	4.735	0		0			148
		149	0	0	0	0	11.402	11.402	0		0			149	0	0	0	0	26.671	26.671	0		0			149	0	0	0	0	11.101	11.101	-1.491		1.491			149	0	0	0	0	4.735	0		0			149
		150	0	0	0	0	11.402	11.402	-1.387		1.387			150	0	0	0	0	26.671	26.671	0		0			150	0	0	0	0	12.592	12.592	0		0			150	0	0	0	0	4.735	0		0			150
		151	0	0	0	0	12.789	12.789	-1.191		1.191			151	0	0	0	0	26.671	26.671	0		0			151	0	0	0	0	12.592	12.592	-1.804		1.804			151	0	0	0	0	4.735	0		0			151
		152	0	0	0	0	13.98	13.98	-1.304		1.304			152	0	0	0	0	26.671	26.671	0		0			152	0	0	0	0	14.396	14.396	-2.02		2.02			152	0	0	0	0	4.735	-2.106		2.106			152
		153	0	0	0	0	15.284	15.284	0		0			153	0	0	0	0	26.671	26.671	0		0			153	0	0	0	0	16.416	16.416	0		0			153	0	0	0	0	6.841	0		0			153
		154	0	0	0	0	15.284	15.284	0		0			154	0	0	0	0	26.671	26.671	0		0			154	0	0	0	0	16.416	16.416	0		0			154	0	0	0	0	6.841	0		0			154
		155	0	0	0	0	15.284	15.284	-1.87		1.87			155	0	0	0	0	26.671	26.671	0		0			155	0	0	0	0	16.416	16.416	0		0			155	0	0	0	0	6.841	4.27					155
		156	0	0	0	0	17.154	17.154	0		0			156	0	0	0	0	26.671	26.671	0		0			156	0	0	0	0	16.416	16.416	-1.453		1.453			156	0	0	0	0	2.571	-0.549		0.549			156
		157	0	0	0	0	17.154	17.154	-2.392		2.392			157	0	0	0	0	26.671	26.671	0		0			157	0	0	0	0	17.869	17.869	-2.693		2.693			157	0	0	0	0	3.12	-0.737		0.737			157
		158	0	0	0	0	19.546	19.546	0		0			158	0	0	0	0	26.671	26.671	0		0			158	0	0	0	0	20.562	20.562	0		0			158	0	0	0	0	3.857	0		0			158
		159	0	0	0	0	19.546	19.546	0		0			159	0	0	0	0	26.671	26.671	0		0			159	0	0	0	0	20.562	20.562	0		0			159	0	0	0	0	3.857	-1.405		1.405			159
		160	0	0	0	0	19.546	19.546	0		0			160	0	0	0	0	26.671	26.671	0		0			160	0	0	0	0	20.562	20.562	0		0			160	0	0	0	0	5.262	0		0			160
		161	0	0	0	0	19.546	19.546	0		0			161	0	0	0	0	26.671	26.671	0		0			161	0	0	0	0	20.562	20.562	-2.524		2.524			161	0	0	0	0	5.262	-1.871		1.871			161
		162	0	0	0	0	19.546	19.546	-0.979		0.979			162	0	0	0	0	26.671	26.671	0		0			162	0	0	0	0	23.086	23.086	0		0			162	0	0	0	0	7.133	0		0			162
		163	0	0	0	0	20.525	20.525	0		0			163	0	0	0	0	26.671	26.671	0		0			163	0	0	0	0	23.086	23.086	0		0			163	0	0	0	0	7.133	0		0			163
		164	0	0	0	0	20.525	20.525	0		0			164	0	0	0	0	26.671	26.671	0		0			164	0	0	0	0	23.086	23.086	-1.262		1.262			164	0	0	0	0	7.133	0		0			164
		165	0	0	0	0	20.525	20.525	-0.825		0.825			165	0	0	0	0	26.671	26.671	0		0			165	0	0	0	0	24.348	24.348	0		0			165	0	0	0	0	7.133	0		0			165
		166	0	0	0	0	21.35	21.35	21.159					166	0	0	0	0	26.671	26.671	0		0			166	0	0	0	0	24.348	24.348	-2.715		2.715			166	0	0	0	0	7.133	0		0			166
		167	0	0	0	0	0.191	0.191	0.008					167	0	0	0	0	26.671	26.671	0		0			167	0	0	0	0	27.063	27.063	0		0			167	0	0	0	0	7.133	0		0			167
		168	0	0	0	0	0.183	0.183	-1.477		1.477			168	0	0	0	0	26.671	26.671	0		0			168	0	0	0	0	27.063	27.063	0		0			168	0	0	0	0	7.133	0		0			168
		169	0	0	0	0	1.66	1.66	-1.748		1.748			169	0	0	0	0	26.671	26.671	0		0			169	0	0	0	0	27.063	27.063	22.923					169	0	0	0	0	7.133	0		0			169
		170	0	0	0	0	3.408	3.408	-2.624		2.624			170	0	0	0	0	26.671	26.671	0		0			170	0	0	0	0	4.14	4.14	0		0			170	0	0	0	0	7.133	-2.298		2.298			170
		171	0	0	0	0	6.032	6.032	-2.007		2.007			171	0	0	0	0	26.671	26.671	0		0			171	0	0	0	0	4.14	4.14	-3.626		3.626			171	0	0	0	0	9.431	0		0			171
		172	0	0	0	0	8.039	8.039	-0.926		0.926			172	0	0	0	0	26.671	26.671	0		0			172	0	0	0	0	7.766	7.766	-2.844		2.844			172	0	0	0	0	9.431	0		0			172
		173	0	0	0	0	8.965	8.965	-1.695		1.695			173	0	0	0	0	26.671	26.671	0		0			173	0	0	0	0	10.61	10.61	-1.591		1.591			173	0	0	0	0	9.431	0		0			173
		174	0	0	0	0	10.66	10.66	-0.937		0.937			174	0	0	0	0	26.671	26.671	0		0			174	0	0	0	0	12.201	12.201	0		0			174	0	0	0	0	9.431	0		0			174
		175	0	0	0	0	11.597	11.597	-1.681		1.681			175	0	0	0	0	26.671	26.671	0		0			175	0	0	0	0	12.201	12.201	0		0			175	0	0	0	0	9.431	0		0			175
		176	0	0	0	0	13.278	13.278	0		0			176	0	0	0	0	26.671	26.671	0		0			176	0	0	0	0	12.201	12.201	-1.965		1.965			176	0	0	0	0	9.431	0		0			176
		177	0	0	0	0	13.278	13.278	0		0			177	0	0	0	0	26.671	26.671	0		0			177	0	0	0	0	14.166	14.166	-2.013		2.013			177	0	0	0	0	9.431	0		0			177
		178	0	0	0	0	13.278	13.278	14.927					178	0	0	0	0	26.671	26.671	0		0			178	0	0	0	0	16.179	16.179	0		0			178	0	0	0	0	9.431	0		0			178
		179	0	0	0	0	1.649	-1.649	-2.108		2.108			179	0	0	0	0	26.671	26.671	0		0			179	0	0	0	0	16.179	16.179	-1.8		1.8			179	0	0	0	0	9.431	0		0			179
		180	0	0	0	0	0.459	0.459	-1.771		1.771			180	0	0	0	0	26.671	26.671	0		0			180	0	0	0	0	17.979	17.979	0		0			180	0	0	0	0	9.431	0		0			180
		181	0	0	0	0	2.23	2.23	-2.015		2.015			181	0	0	0	0	26.671	26.671	0		0			181	0	0	0	0	17.979	17.979	0		0			181	0	0	0	0	9.431	0		0			181
		182	0	0	0	0	4.245	4.245	-1.039		1.039			182	0	0	0	0	26.671	26.671	0		0			182	0	0	0	0	17.979	17.979	-2.947		2.947			182	0	0	0	0	9.431	0		0			182
		183	0	0	0	0	5.284	5.284						183	0	0	0	0	26.671	26.671						183	0	0	0	0	20.926	20.926						183	0	0	0	0	9.431						183
[truncated: 96 more columns]

## Sheet: Hoja4
	Trial#1 -10dpt
	(control)
	4 frames per second
		EtOH 10dpt	ser01						degrees rot	# saccades	speed rotat	speed average		EtOH 10dpt	ser02						degrees rot	# saccades	speed rotat	speed average		EtOH 10dpt	ser03						degrees rot	# saccades	speed rotat	speed average		EtOH 10dpt	ser05						degrees rot	# saccades	speed rotat	speed average
		1	0	0	0	0	19.661	19.661	-0.782	7	0.782	1.53243		1	0	0	0	0	7.972	7.972	-1.915	9	1.915	1.68703		1	0	0	0	0	0.093	0.093	-2.457	1	2.457	0.842136		1	0	0	0	0	0.145	0.145	-1.646	8	1.646	1.73368
		2	0	0	0	0	20.443	20.443	0		0			2	0	0	0	0	9.887	9.887	-2.362		2.362			2	0	0	0	0	2.55	2.55	0		0			2	0	0	0	0	1.791	1.791	-2.116		2.116
		3	0	0	0	0	20.443	20.443	0		0			3	0	0	0	0	12.249	12.249	-1.751		1.751			3	0	0	0	0	2.55	2.55	-1.783		1.783			3	0	0	0	0	3.907	3.907	-1.035		1.035
		4	0	0	0	0	20.443	20.443	-1.754		1.754			4	0	0	0	0	14	14	-1.2		1.2			4	0	0	0	0	4.333	4.333	0		0			4	0	0	0	0	4.942	4.942	-3.059		3.059
		5	0	0	0	0	22.197	22.197	-1.972		1.972			5	0	0	0	0	15.2	15.2	-1.905		1.905			5	0	0	0	0	4.333	4.333	-1.683		1.683			5	0	0	0	0	8.001	8.001	21.224
		6	0	0	0	0	24.169	24.169	-1.401		1.401			6	0	0	0	0	17.105	17.105	-1.469		1.469			6	0	0	0	0	6.016	6.016	-1.067		1.067			6	0	0	0	0	13.223	-13.223	-4.09		4.09
		7	0	0	0	0	25.57	25.57	-1.108		1.108			7	0	0	0	0	18.574	18.574	30.526					7	0	0	0	0	7.083	7.083	-1.279		1.279			7	0	0	0	0	9.133	-9.133	-1.743		1.743
		8	0	0	0	0	26.678	26.678	36.181					8	0	0	0	0	11.952	-11.952	0		0			8	0	0	0	0	8.362	8.362	-2.678		2.678			8	0	0	0	0	7.39	-7.39	-2.335		2.335
		9	0	0	0	0	9.503	-9.503	-2.712		2.712			9	0	0	0	0	11.952	-11.952	-2.161		2.161			9	0	0	0	0	11.04	11.04	-2.106		2.106			9	0	0	0	0	5.055	-5.055	-1.506		1.506
		10	0	0	0	0	6.791	-6.791	-2.797		2.797			10	0	0	0	0	9.791	-9.791	0		0			10	0	0	0	0	13.146	13.146	-1.977		1.977			10	0	0	0	0	3.549	-3.549	-0.88		0.88
		11	0	0	0	0	3.994	-3.994	-2.681		2.681			11	0	0	0	0	9.791	-9.791	-2.295		2.295			11	0	0	0	0	15.123	15.123	0		0			11	0	0	0	0	2.669	-2.669	-1.445		1.445
		12	0	0	0	0	1.313	-1.313	-2.431		2.431			12	0	0	0	0	7.496	-7.496	-3.386		3.386			12	0	0	0	0	15.123	15.123	0		0			12	0	0	0	0	1.224	-1.224	-2.621		2.621
		13	0	0	0	0	1.118	1.118	-2.616		2.616			13	0	0	0	0	4.11	-4.11	-2.587		2.587			13	0	0	0	0	15.123	15.123	-2.325		2.325			13	0	0	0	0	1.397	1.397	-2.547		2.547
		14	0	0	0	0	3.734	3.734	-3.07		3.07			14	0	0	0	0	1.523	-1.523	-0.282		0.282			14	0	0	0	0	17.448	17.448	0		0			14	0	0	0	0	3.944	3.944	-1.395		1.395
		15	0	0	0	0	6.804	6.804	-1.777		1.777			15	0	0	0	0	1.241	-1.241	-1.452		1.452			15	0	0	0	0	17.448	17.448	0		0			15	0	0	0	0	5.339	5.339	-1.82		1.82
		16	0	0	0	0	8.581	8.581	-3.353		3.353			16	0	0	0	0	0.211	0.211	-2.774		2.774			16	0	0	0	0	17.448	17.448	0		0			16	0	0	0	0	7.159	7.159	-2.532		2.532
		17	0	0	0	0	11.934	11.934	0		0			17	0	0	0	0	2.985	2.985	-2.762		2.762			17	0	0	0	0	17.448	17.448	0		0			17	0	0	0	0	9.691	9.691	-2.765		2.765
		18	0	0	0	0	11.934	11.934	-2.288		2.288			18	0	0	0	0	5.747	5.747	-2.316		2.316			18	0	0	0	0	17.448	17.448	0		0			18	0	0	0	0	12.456	12.456	-1.489		1.489
		19	0	0	0	0	14.222	14.222	-2.36		2.36			19	0	0	0	0	8.063	8.063	-2.27		2.27			19	0	0	0	0	17.448	17.448	8.418					19	0	0	0	0	13.945	13.945	-1.325		1.325
		20	0	0	0	0	16.582	16.582	-1.454		1.454			20	0	0	0	0	10.333	10.333	-1.943		1.943			20	0	0	0	0	9.03	9.03	-1.677		1.677			20	0	0	0	0	15.27	15.27	-2.249		2.249
		21	0	0	0	0	18.036	18.036	-2.112		2.112			21	0	0	0	0	12.276	12.276	-1.889		1.889			21	0	0	0	0	10.707	10.707	0		0			21	0	0	0	0	17.519	17.519	-1.351		1.351
		22	0	0	0	0	20.148	20.148	0		0			22	0	0	0	0	14.165	14.165	-1.218		1.218			22	0	0	0	0	10.707	10.707	-1.945		1.945			22	0	0	0	0	18.87	18.87	-2.636		2.636
		23	0	0	0	0	20.148	20.148	-2.793		2.793			23	0	0	0	0	15.383	15.383	-1.397		1.397			23	0	0	0	0	12.652	12.652	0		0			23	0	0	0	0	21.506	21.506	-0.832		0.832
		24	0	0	0	0	22.941	22.941	0		0			24	0	0	0	0	16.78	16.78	-0.9		0.9			24	0	0	0	0	12.652	12.652	-1.018		1.018			24	0	0	0	0	22.338	22.338	0		0
		25	0	0	0	0	22.941	22.941	0		0			25	0	0	0	0	17.68	17.68	30.667					25	0	0	0	0	13.67	13.67	0		0			25	0	0	0	0	22.338	22.338	-2.677		2.677
		26	0	0	0	0	22.941	22.941	-3.282		3.282			26	0	0	0	0	12.987	-12.987	-2.94		2.94			26	0	0	0	0	13.67	13.67	-2.007		2.007			26	0	0	0	0	25.015	25.015	-1.108		1.108
		27	0	0	0	0	26.223	26.223	0		0			27	0	0	0	0	10.047	-10.047	-2.3		2.3			27	0	0	0	0	15.677	15.677	0		0			27	0	0	0	0	26.123	26.123	0		0
		28	0	0	0	0	26.223	26.223	0		0			28	0	0	0	0	7.747	-7.747	-2.942		2.942			28	0	0	0	0	15.677	15.677	-1.378		1.378			28	0	0	0	0	26.123	26.123	42.558
		29	0	0	0	0	26.223	26.223	0		0			29	0	0	0	0	4.805	-4.805	-1.059		1.059			29	0	0	0	0	17.055	17.055	-1.962		1.962			29	0	0	0	0	16.435	-16.435	-4.732		4.732
		30	0	0	0	0	26.223	26.223	0		0			30	0	0	0	0	3.746	-3.746	-4.024		4.024			30	0	0	0	0	19.017	19.017	0		0			30	0	0	0	0	11.703	-11.703	-2.889		2.889
		31	0	0	0	0	26.223	26.223	12.459					31	0	0	0	0	0.278	0.278	-3.076		3.076			31	0	0	0	0	19.017	19.017	-1.236		1.236			31	0	0	0	0	8.814	-8.814	-1.978		1.978
		32	0	0	0	0	13.764	13.764	0		0			32	0	0	0	0	3.354	3.354	-1.848		1.848			32	0	0	0	0	20.253	20.253	0		0			32	0	0	0	0	6.836	-6.836	-1.83		1.83
		33	0	0	0	0	13.764	13.764	-3.417		3.417			33	0	0	0	0	5.202	5.202	-2.225		2.225			33	0	0	0	0	20.253	20.253	-1.594		1.594			33	0	0	0	0	5.006	-5.006	-0.881		0.881
		34	0	0	0	0	17.181	17.181	0		0			34	0	0	0	0	7.427	7.427	-0.805		0.805			34	0	0	0	0	21.847	21.847	-2.647		2.647			34	0	0	0	0	4.125	-4.125	-1.816		1.816
		35	0	0	0	0	17.181	17.181	-1.932		1.932			35	0	0	0	0	8.232	8.232	-1.333		1.333			35	0	0	0	0	24.494	24.494	0		0			35	0	0	0	0	2.309	-2.309	-2.323		2.323
		36	0	0	0	0	19.113	19.113	0		0			36	0	0	0	0	9.565	9.565	-1.628		1.628			36	0	0	0	0	24.494	24.494	15.27					36	0	0	0	0	0.014	0.014	-1.833		1.833
		37	0	0	0	0	19.113	19.113	0		0			37	0	0	0	0	11.193	11.193	-1.892		1.892			37	0	0	0	0	9.224	9.224	-1.255		1.255			37	0	0	0	0	1.847	1.847	-3.15		3.15
		38	0	0	0	0	19.113	19.113	0		0			38	0	0	0	0	13.085	13.085	-1.633		1.633			38	0	0	0	0	10.479	10.479	-1.654		1.654			38	0	0	0	0	4.997	4.997	-5.309		5.309
		39	0	0	0	0	19.113	19.113	0		0			39	0	0	0	0	14.718	14.718	-1.071		1.071			39	0	0	0	0	12.133	12.133	-2.372		2.372			39	0	0	0	0	10.306	10.306	-2.879		2.879
		40	0	0	0	0	19.113	19.113	-1.948		1.948			40	0	0	0	0	15.789	15.789	-3.413		3.413			40	0	0	0	0	14.505	14.505	-1.198		1.198			40	0	0	0	0	13.185	13.185	0		0
		41	0	0	0	0	21.061	21.061	0		0			41	0	0	0	0	19.202	19.202	-1.71		1.71			41	0	0	0	0	15.703	15.703	0		0			41	0	0	0	0	13.185	13.185	-1.942		1.942
		42	0	0	0	0	21.061	21.061	-1.997		1.997			42	0	0	0	0	20.912	20.912	-0.558		0.558			42	0	0	0	0	15.703	15.703	-2.607		2.607			42	0	0	0	0	15.127	15.127	0		0
		43	0	0	0	0	23.058	23.058	0		0			43	0	0	0	0	21.47	21.47	0		0			43	0	0	0	0	18.31	18.31	0		0			43	0	0	0	0	15.127	15.127	-2.75		2.75
		44	0	0	0	0	23.058	23.058	0		0			44	0	0	0	0	21.47	21.47	29.442					44	0	0	0	0	18.31	18.31	-2.63		2.63			44	0	0	0	0	17.877	17.877	-2.129		2.129
		45	0	0	0	0	23.058	23.058	-2.435		2.435			45	0	0	0	0	7.972	-7.972	-3.979		3.979			45	0	0	0	0	20.94	20.94	0		0			45	0	0	0	0	20.006	20.006	-1.85		1.85
		46	0	0	0	0	25.493	25.493	0		0			46	0	0	0	0	3.993	-3.993	-3.387		3.387			46	0	0	0	0	20.94	20.94	-2.679		2.679			46	0	0	0	0	21.856	21.856	-3.065		3.065
		47	0	0	0	0	25.493	25.493	-2.503		2.503			47	0	0	0	0	0.606	-0.606	-1.212		1.212			47	0	0	0	0	23.619	23.619	0		0			47	0	0	0	0	24.921	24.921	-1.66		1.66
		48	0	0	0	0	27.996	27.996	0		0			48	0	0	0	0	0.606	0.606	-0.39		0.39			48	0	0	0	0	23.619	23.619	0		0			48	0	0	0	0	26.581	26.581	-1.067		1.067
		49	0	0	0	0	27.996	27.996	0		0			49	0	0	0	0	0.996	0.996	-0.894		0.894			49	0	0	0	0	23.619	23.619	14.159					49	0	0	0	0	27.648	27.648	0		0
		50	0	0	0	0	27.996	27.996	0		0			50	0	0	0	0	1.89	1.89	-2.908		2.908			50	0	0	0	0	9.46	9.46	-1.977		1.977			50	0	0	0	0	27.648	27.648	0		0
		51	0	0	0	0	27.996	27.996	-3.219		3.219			51	0	0	0	0	4.798	4.798	-0.785		0.785			51	0	0	0	0	11.437	11.437	0		0			51	0	0	0	0	27.648	27.648	0		0
		52	0	0	0	0	31.215	31.215	0		0			52	0	0	0	0	5.583	5.583	-2.567		2.567			52	0	0	0	0	11.437	11.437	-3.657		3.657			52	0	0	0	0	27.648	27.648	30.563
		53	0	0	0	0	31.215	31.215	-3.655		3.655			53	0	0	0	0	8.15	8.15	-1.689		1.689			53	0	0	0	0	15.094	15.094	0		0			53	0	0	0	0	2.915	-2.915	-3.636		3.636
		54	0	0	0	0	34.87	34.87	0		0			54	0	0	0	0	9.839	9.839	-2.064		2.064			54	0	0	0	0	15.094	15.094	-4.175		4.175			54	0	0	0	0	0.721	0.721	-0.274		0.274
		55	0	0	0	0	34.87	34.87	40.126					55	0	0	0	0	11.903	11.903	-2.192		2.192			55	0	0	0	0	19.269	19.269	0		0			55	0	0	0	0	0.995	0.995	-1.257		1.257
		56	0	0	0	0	5.256	-5.256	-3.439		3.439			56	0	0	0	0	14.095	14.095	-2.868		2.868			56	0	0	0	0	19.269	19.269	-2.885		2.885			56	0	0	0	0	2.252	2.252	-1.545		1.545
		57	0	0	0	0	1.817	-1.817	-2.262		2.262			57	0	0	0	0	16.963	16.963	0		0			57	0	0	0	0	22.154	22.154	0		0			57	0	0	0	0	3.797	3.797	-1.213		1.213
		58	0	0	0	0	0.445	0.445	-1.645		1.645			58	0	0	0	0	16.963	16.963	-2.653		2.653			58	0	0	0	0	22.154	22.154	0		0			58	0	0	0	0	5.01	5.01	-0.861		0.861
		59	0	0	0	0	2.09	2.09	-1.791		1.791			59	0	0	0	0	19.616	19.616	-1.627		1.627			59	0	0	0	0	22.154	22.154	0		0			59	0	0	0	0	5.871	5.871	-1.649		1.649
		60	0	0	0	0	3.881	3.881	-2.146		2.146			60	0	0	0	0	21.243	21.243	0		0			60	0	0	0	0	22.154	22.154	13.338					60	0	0	0	0	7.52	7.52	-1.177		1.177
		61	0	0	0	0	6.027	6.027	-2.801		2.801			61	0	0	0	0	21.243	21.243	-2.745		2.745			61	0	0	0	0	8.816	8.816	0		0			61	0	0	0	0	8.697	8.697	-0.553		0.553
		62	0	0	0	0	8.828	8.828	-2.617		2.617			62	0	0	0	0	23.988	23.988	0		0			62	0	0	0	0	8.816	8.816	-3.462		3.462			62	0	0	0	0	9.25	9.25	-2.122		2.122
		63	0	0	0	0	11.445	11.445	-0.626		0.626			63	0	0	0	0	23.988	23.988	-2.135		2.135			63	0	0	0	0	12.278	12.278	-1.269		1.269			63	0	0	0	0	11.372	11.372	0		0
		64	0	0	0	0	12.071	12.071	-3.057		3.057			64	0	0	0	0	26.123	26.123	-2.059		2.059			64	0	0	0	0	13.547	13.547	0		0			64	0	0	0	0	11.372	11.372	-2.051		2.051
		65	0	0	0	0	15.128	15.128	-1.487		1.487			65	0	0	0	0	28.182	28.182	0		0			65	0	0	0	0	13.547	13.547	-2.436		2.436			65	0	0	0	0	13.423	13.423	0		0
		66	0	0	0	0	16.615	16.615	-2.036		2.036			66	0	0	0	0	28.182	28.182	-2.55		2.55			66	0	0	0	0	15.983	15.983	-1.022		1.022			66	0	0	0	0	13.423	13.423	-1.908		1.908
		67	0	0	0	0	18.651	18.651	0		0			67	0	0	0	0	30.732	30.732	0		0			67	0	0	0	0	17.005	17.005	0		0			67	0	0	0	0	15.331	15.331	0		0
		68	0	0	0	0	18.651	18.651	-2.44		2.44			68	0	0	0	0	30.732	30.732	0		0			68	0	0	0	0	17.005	17.005	-2.846		2.846			68	0	0	0	0	15.331	15.331	-2.937		2.937
		69	0	0	0	0	21.091	21.091	0		0			69	0	0	0	0	30.732	30.732	41.386					69	0	0	0	0	19.851	19.851	-1.407		1.407			69	0	0	0	0	18.268	18.268	-1.163		1.163
		70	0	0	0	0	21.091	21.091	-1.998		1.998			70	0	0	0	0	10.654	-10.654	-3.556		3.556			70	0	0	0	0	21.258	21.258	-1.227		1.227			70	0	0	0	0	19.431	19.431	0		0
		71	0	0	0	0	23.089	23.089	-1.531		1.531			71	0	0	0	0	7.098	-7.098	-3.436		3.436			71	0	0	0	0	22.485	22.485	0		0			71	0	0	0	0	19.431	19.431	-1.847		1.847
		72	0	0	0	0	24.62	24.62	-1.936		1.936			72	0	0	0	0	3.662	-3.662	-2.395		2.395			72	0	0	0	0	22.485	22.485	5.033					72	0	0	0	0	21.278	21.278	0		0
		73	0	0	0	0	26.556	26.556	-0.834		0.834			73	0	0	0	0	1.267	-1.267	-2.248		2.248			73	0	0	0	0	17.452	17.452	-2.827		2.827			73	0	0	0	0	21.278	21.278	-1.361		1.361
		74	0	0	0	0	27.39	27.39	-1.814		1.814			74	0	0	0	0	0.981	0.981	-1.468		1.468			74	0	0	0	0	20.279	20.279	0		0			74	0	0	0	0	22.639	22.639	0		0
		75	0	0	0	0	29.204	29.204	0		0			75	0	0	0	0	2.449	2.449	-1.739		1.739			75	0	0	0	0	20.279	20.279	-3.286		3.286			75	0	0	0	0	22.639	22.639	0		0
		76	0	0	0	0	29.204	29.204	-2.228		2.228			76	0	0	0	0	4.188	4.188	-3.309		3.309			76	0	0	0	0	23.565	23.565	0		0			76	0	0	0	0	22.639	22.639	-1.686		1.686
		77	0	0	0	0	31.432	31.432	33.599					77	0	0	0	0	7.497	7.497	-2.943		2.943			77	0	0	0	0	23.565	23.565	0		0			77	0	0	0	0	24.325	24.325	0		0
		78	0	0	0	0	2.167	-2.167	6.053					78	0	0	0	0	10.44	10.44	-2.338		2.338			78	0	0	0	0	23.565	23.565	0		0			78	0	0	0	0	24.325	24.325	0		0
		79	0	0	0	0	8.22	-8.22	-3.508		3.508			79	0	0	0	0	12.778	12.778	-2.356		2.356			79	0	0	0	0	23.565	23.565	0		0			79	0	0	0	0	24.325	24.325	-1.441		1.441
		80	0	0	0	0	4.712	-4.712	-1.875		1.875			80	0	0	0	0	15.134	15.134	0		0			80	0	0	0	0	23.565	23.565	0		0			80	0	0	0	0	25.766	25.766	0		0
		81	0	0	0	0	2.837	-2.837	-3.218		3.218			81	0	0	0	0	15.134	15.134	-1.92		1.92			81	0	0	0	0	23.565	23.565	7.232					81	0	0	0	0	25.766	25.766	39.563
		82	0	0	0	0	0.381	0.381	-1.984		1.984			82	0	0	0	0	17.054	17.054	-2.565		2.565			82	0	0	0	0	16.333	16.333	-1.69		1.69			82	0	0	0	0	13.797	-13.797	-2.391		2.391
		83	0	0	0	0	2.365	2.365	-1.591		1.591			83	0	0	0	0	19.619	19.619	-1.166		1.166			83	0	0	0	0	18.023	18.023	0		0			83	0	0	0	0	11.406	-11.406	-2.562		2.562
		84	0	0	0	0	3.956	3.956	-3.359		3.359			84	0	0	0	0	20.785	20.785	-1.539		1.539			84	0	0	0	0	18.023	18.023	0		0			84	0	0	0	0	8.844	-8.844	-2.786		2.786
		85	0	0	0	0	7.315	7.315	-1.75		1.75			85	0	0	0	0	22.324	22.324	0		0			85	0	0	0	0	18.023	18.023	0		0			85	0	0	0	0	6.058	-6.058	-1.995		1.995
		86	0	0	0	0	9.065	9.065	-1.648		1.648			86	0	0	0	0	22.324	22.324	-1.963		1.963			86	0	0	0	0	18.023	18.023	0		0			86	0	0	0	0	4.063	-4.063	-1.423		1.423
		87	0	0	0	0	10.713	10.713	0		0			87	0	0	0	0	24.287	24.287	-1.124		1.124			87	0	0	0	0	18.023	18.023	0		0			87	0	0	0	0	2.64	-2.64	-3.402		3.402
		88	0	0	0	0	10.713	10.713	-2.182		2.182			88	0	0	0	0	25.411	25.411	0		0			88	0	0	0	0	18.023	18.023	0		0			88	0	0	0	0	0.762	0.762	-1.498		1.498
		89	0	0	0	0	12.895	12.895	-1.85		1.85			89	0	0	0	0	25.411	25.411	-1.703		1.703			89	0	0	0	0	18.023	18.023	0		0			89	0	0	0	0	2.26	2.26	-2.157		2.157
		90	0	0	0	0	14.745	14.745	-2.363		2.363			90	0	0	0	0	27.114	27.114	-2.092		2.092			90	0	0	0	0	18.023	18.023	0		0			90	0	0	0	0	4.417	4.417	-3.403		3.403
		91	0	0	0	0	17.108	17.108	-2.12		2.12			91	0	0	0	0	29.206	29.206	0		0			91	0	0	0	0	18.023	18.023	0		0			91	0	0	0	0	7.82	7.82	-2.757		2.757
		92	0	0	0	0	19.228	19.228	-1.689		1.689			92	0	0	0	0	29.206	29.206	-1.409		1.409			92	0	0	0	0	18.023	18.023	-1.533		1.533			92	0	0	0	0	10.577	10.577	-3.004		3.004
		93	0	0	0	0	20.917	20.917	-1.636		1.636			93	0	0	0	0	30.615	30.615	39.464					93	0	0	0	0	19.556	19.556	0		0			93	0	0	0	0	13.581	13.581	-2.59		2.59
		94	0	0	0	0	22.553	22.553	-1.466		1.466			94	0	0	0	0	8.849	-8.849	-5.693		5.693			94	0	0	0	0	19.556	19.556	-0.688		0.688			94	0	0	0	0	16.171	16.171	-1.516		1.516
		95	0	0	0	0	24.019	24.019	-1.82		1.82			95	0	0	0	0	3.156	-3.156	-3.245		3.245			95	0	0	0	0	20.244	20.244	16.654					95	0	0	0	0	17.687	17.687	-2.065		2.065
		96	0	0	0	0	25.839	25.839	-1.351		1.351			96	0	0	0	0	0.089	0.089	-2.108		2.108			96	0	0	0	0	3.59	3.59	0		0			96	0	0	0	0	19.752	19.752	-2.071		2.071
		97	0	0	0	0	27.19	27.19	0		0			97	0	0	0	0	2.197	2.197	0.288		-0.288			97	0	0	0	0	3.59	3.59	-2.135		2.135			97	0	0	0	0	21.823	21.823	-1.405		1.405
		98	0	0	0	0	27.19	27.19	34.354					98	0	0	0	0	1.909	1.909	-3.319		3.319			98	0	0	0	0	5.725	5.725	-2.071		2.071			98	0	0	0	0	23.228	23.228	-0.531		0.531
		99	0	0	0	0	7.164	-7.164	-2.62		2.62			99	0	0	0	0	5.228	5.228	-2.002		2.002			99	0	0	0	0	7.796	7.796	-2.393		2.393			99	0	0	0	0	23.759	23.759	-1.575		1.575
		100	0	0	0	0	4.544	-4.544	-1.951		1.951			100	0	0	0	0	7.23	7.23	-2.735		2.735			100	0	0	0	0	10.189	10.189	-2.556		2.556			100	0	0	0	0	25.334	25.334	-1.742		1.742
		101	0	0	0	0	2.593	-2.593	-5.77		5.77			101	0	0	0	0	9.965	9.965	-2.072		2.072			101	0	0	0	0	12.745	12.745	-1.608		1.608			101	0	0	0	0	27.076	27.076	0		0
		102	0	0	0	0	3.177	3.177	-3.055		3.055			102	0	0	0	0	12.037	12.037	-2.504		2.504			102	0	0	0	0	14.353	14.353	0.381					102	0	0	0	0	27.076	27.076	40.968
		103	0	0	0	0	6.232	6.232	-1.69		1.69			103	0	0	0	0	14.541	14.541	-2.594		2.594			103	0	0	0	0	13.972	13.972	-2.223		2.223			103	0	0	0	0	13.892	-13.892	-2.713		2.713
		104	0	0	0	0	7.922	7.922	-2.503		2.503			104	0	0	0	0	17.135	17.135	-2.149		2.149			104	0	0	0	0	16.195	16.195	0		0			104	0	0	0	0	11.179	-11.179	-2.781		2.781
		105	0	0	0	0	10.425	10.425	-1.974		1.974			105	0	0	0	0	19.284	19.284	-1.333		1.333			105	0	0	0	0	16.195	16.195	-1.658		1.658			105	0	0	0	0	8.398	-8.398	-2.274		2.274
		106	0	0	0	0	12.399	12.399	-0.919		0.919			106	0	0	0	0	20.617	20.617	-1.165		1.165			106	0	0	0	0	17.853	17.853	0		0			106	0	0	0	0	6.124	-6.124	-2.207		2.207
		107	0	0	0	0	13.318	13.318	-1.418		1.418			107	0	0	0	0	21.782	21.782	-1.104		1.104			107	0	0	0	0	17.853	17.853	-2.314		2.314			107	0	0	0	0	3.917	-3.917	-1.81		1.81
		108	0	0	0	0	14.736	14.736	-1.34		1.34			108	0	0	0	0	22.886	22.886	-1.659		1.659			108	0	0	0	0	20.167	20.167	0		0			108	0	0	0	0	2.107	-2.107	-3.321		3.321
		109	0	0	0	0	16.076	16.076	-2.063		2.063			109	0	0	0	0	24.545	24.545	0		0			109	0	0	0	0	20.167	20.167	0		0			109	0	0	0	0	1.214	1.214	-0.895		0.895
		110	0	0	0	0	18.139	18.139	0		0			110	0	0	0	0	24.545	24.545	-2.273		2.273			110	0	0	0	0	20.167	20.167	10.781					110	0	0	0	0	2.109	2.109	-3.486		3.486
		111	0	0	0	0	18.139	18.139	-4.079		4.079			111	0	0	0	0	26.818	26.818	0		0			111	0	0	0	0	9.386	9.386	-1.851		1.851			111	0	0	0	0	5.595	5.595	-2.58		2.58
		112	0	0	0	0	22.218	22.218	-0.702		0.702			112	0	0	0	0	26.818	26.818	0		0			112	0	0	0	0	11.237	11.237	0		0			112	0	0	0	0	8.175	8.175	-2.199		2.199
		113	0	0	0	0	22.92	22.92	-1.407		1.407			113	0	0	0	0	26.818	26.818	-2.394		2.394			113	0	0	0	0	11.237	11.237	-3.234		3.234			113	0	0	0	0	10.374	10.374	-2.941		2.941
		114	0	0	0	0	24.327	24.327	-1.722		1.722			114	0	0	0	0	29.212	29.212	0		0			114	0	0	0	0	14.471	14.471	0		0			114	0	0	0	0	13.315	13.315	-2.02		2.02
		115	0	0	0	0	26.049	26.049	-2.993		2.993			115	0	0	0	0	29.212	29.212	0		0			115	0	0	0	0	14.471	14.471	-1.775		1.775			115	0	0	0	0	15.335	15.335	-1.327		1.327
		116	0	0	0	0	29.042	29.042	0		0			116	0	0	0	0	29.212	29.212	28.865					116	0	0	0	0	16.246	16.246	0		0			116	0	0	0	0	16.662	16.662	-1.382		1.382
		117	0	0	0	0	29.042	29.042	32.447					117	0	0	0	0	0.347	0.347	-3.855		3.855			117	0	0	0	0	16.246	16.246	0		0			117	0	0	0	0	18.044	18.044	-2.947		2.947
		118	0	0	0	0	3.405	-3.405	-3.487		3.487			118	0	0	0	0	4.202	4.202	-4.825		4.825			118	0	0	0	0	16.246	16.246	-2.515		2.515			118	0	0	0	0	20.991	20.991	-1.186		1.186
		119	0	0	0	0	0.082	0.082	0		0			119	0	0	0	0	9.027	9.027	-2.776		2.776			119	0	0	0	0	18.761	18.761	0		0			119	0	0	0	0	22.177	22.177	-2.518		2.518
		120	0	0	0	0	0.082	0.082	-1.421		1.421			120	0	0	0	0	11.803	11.803	-0.865		0.865			120	0	0	0	0	18.761	18.761	0		0			120	0	0	0	0	24.695	24.695	-0.772		0.772
		121	0	0	0	0	1.503	1.503	-3.182		3.182			121	0	0	0	0	12.668	12.668	-2.95		2.95			121	0	0	0	0	18.761	18.761	-1.777		1.777			121	0	0	0	0	25.467	25.467	0		0
		122	0	0	0	0	4.685	4.685	-2.465		2.465			122	0	0	0	0	15.618	15.618	-1.75		1.75			122	0	0	0	0	20.538	20.538	0		0			122	0	0	0	0	25.467	25.467	0		0
		123	0	0	0	0	7.15	7.15	-2.259		2.259			123	0	0	0	0	17.368	17.368	-1.634		1.634			123	0	0	0	0	20.538	20.538	-2.038		2.038			123	0	0	0	0	25.467	25.467	-1.747		1.747
		124	0	0	0	0	9.409	9.409	-1.769		1.769			124	0	0	0	0	19.002	19.002	-1.767		1.767			124	0	0	0	0	22.576	22.576	0		0			124	0	0	0	0	27.214	27.214	0		0
		125	0	0	0	0	11.178	11.178	-1.829		1.829			125	0	0	0	0	20.769	20.769	-1.241		1.241			125	0	0	0	0	22.576	22.576	-0.915		0.915			125	0	0	0	0	27.214	27.214	0		0
		126	0	0	0	0	13.007	13.007	-1.908		1.908			126	0	0	0	0	22.01	22.01	-0.815		0.815			126	0	0	0	0	23.491	23.491	0		0			126	0	0	0	0	27.214	27.214	39.104
		127	0	0	0	0	14.915	14.915	-1.718		1.718			127	0	0	0	0	22.825	22.825	0		0			127	0	0	0	0	23.491	23.491	0		0			127	0	0	0	0	11.89	-11.89	0		0
		128	0	0	0	0	16.633	16.633	0		0			128	0	0	0	0	22.825	22.825	0		0			128	0	0	0	0	23.491	23.491	0		0			128	0	0	0	0	11.89	-11.89	-2.659		2.659
		129	0	0	0	0	16.633	16.633	-2.566		2.566			129	0	0	0	0	22.825	22.825	3.265					129	0	0	0	0	23.491	23.491	0		0			129	0	0	0	0	9.231	-9.231	-1.727		1.727
		130	0	0	0	0	19.199	19.199	-2.876		2.876			130	0	0	0	0	19.56	19.56	0		0			130	0	0	0	0	23.491	23.491	0		0			130	0	0	0	0	7.504	-7.504	-2.356		2.356
		131	0	0	0	0	22.075	22.075	-2.693		2.693			131	0	0	0	0	19.56	19.56	0		0			131	0	0	0	0	23.491	23.491	14.063					131	0	0	0	0	5.148	-5.148	-1.639		1.639
		132	0	0	0	0	24.768	24.768	0		0			132	0	0	0	0	19.56	19.56	-2.216		2.216			132	0	0	0	0	9.428	9.428	-2.358		2.358			132	0	0	0	0	3.509	-3.509	-2.21		2.21
		133	0	0	0	0	24.768	24.768	-1.414		1.414			133	0	0	0	0	21.776	21.776	-2.558		2.558			133	0	0	0	0	11.786	11.786	0		0			133	0	0	0	0	1.299	-1.299	-3.558		3.558
		134	0	0	0	0	26.182	26.182	-2.521		2.521			134	0	0	0	0	24.334	24.334	0		0			134	0	0	0	0	11.786	11.786	-3.508		3.508			134	0	0	0	0	2.259	2.259	-2.612		2.612
		135	0	0	0	0	28.703	28.703	0		0			135	0	0	0	0	24.334	24.334	-1.065		1.065			135	0	0	0	0	15.294	15.294	0		0			135	0	0	0	0	4.871	4.871	-2.834		2.834
		136	0	0	0	0	28.703	28.703	0		0			136	0	0	0	0	25.399	25.399	0		0			136	0	0	0	0	15.294	15.294	-3.71		3.71			136	0	0	0	0	7.705	7.705	-3.296		3.296
		137	0	0	0	0	28.703	28.703	-2.205		2.205			137	0	0	0	0	25.399	25.399	0		0			137	0	0	0	0	19.004	19.004	0		0			137	0	0	0	0	11.001	11.001	-1.929		1.929
		138	0	0	0	0	30.908	30.908	0		0			138	0	0	0	0	25.399	25.399	0		0			138	0	0	0	0	19.004	19.004	-1.389		1.389			138	0	0	0	0	12.93	12.93	0		0
		139	0	0	0	0	30.908	30.908	0		0			139	0	0	0	0	25.399	25.399	-2.663		2.663			139	0	0	0	0	20.393	20.393	0		0			139	0	0	0	0	12.93	12.93	-1.552		1.552
		140	0	0	0	0	30.908	30.908	-1.967		1.967			140	0	0	0	0	28.062	28.062	0		0			140	0	0	0	0	20.393	20.393	-1.866		1.866			140	0	0	0	0	14.482	14.482	-1.996		1.996
		141	0	0	0	0	32.875	32.875	32.662					141	0	0	0	0	28.062	28.062	26.42					141	0	0	0	0	22.259	22.259	0		0			141	0	0	0	0	16.478	16.478	-1.438		1.438
		142	0	0	0	0	0.213	0.213	-3.954		3.954			142	0	0	0	0	1.642	1.642	0		0			142	0	0	0	0	22.259	22.259	-1.881		1.881			142	0	0	0	0	17.916	17.916	-1.987		1.987
		143	0	0	0	0	4.167	4.167	0		0			143	0	0	0	0	1.642	1.642	-3.212		3.212			143	0	0	0	0	24.14	24.14	0		0			143	0	0	0	0	19.903	19.903	-2.371		2.371
		144	0	0	0	0	4.167	4.167	-3.063		3.063			144	0	0	0	0	4.854	4.854	-4.429		4.429			144	0	0	0	0	24.14	24.14	3.333					144	0	0	0	0	22.274	22.274	-2.283		2.283
		145	0	0	0	0	7.23	7.23	-2.35		2.35			145	0	0	0	0	9.283	9.283	-2.21		2.21			145	0	0	0	0	20.807	20.807	-1.051		1.051			145	0	0	0	0	24.557	24.557	0		0
		146	0	0	0	0	9.58	9.58	-1.584		1.584			146	0	0	0	0	11.493	11.493	-1.49		1.49			146	0	0	0	0	21.858	21.858	0		0			146	0	0	0	0	24.557	24.557	-1.525		1.525
		147	0	0	0	0	11.164	11.164	0		0			147	0	0	0	0	12.983	12.983	-1.352		1.352			147	0	0	0	0	21.858	21.858	0		0			147	0	0	0	0	26.082	26.082	-0.51		0.51
		148	0	0	0	0	11.164	11.164	-5.793		5.793			148	0	0	0	0	14.335	14.335	-2.39		2.39			148	0	0	0	0	21.858	21.858	0		0			148	0	0	0	0	26.592	26.592	-2.594		2.594
		149	0	0	0	0	16.957	16.957	-2.596		2.596			149	0	0	0	0	16.725	16.725	-2.235		2.235			149	0	0	0	0	21.858	21.858	0		0			149	0	0	0	0	29.186	29.186	0		0
		150	0	0	0	0	19.553	19.553	-0.536		0.536			150	0	0	0	0	18.96	18.96	0		0			150	0	0	0	0	21.858	21.858	0		0			150	0	0	0	0	29.186	29.186	0		0
		151	0	0	0	0	20.089	20.089	0		0			151	0	0	0	0	18.96	18.96	-2.307		2.307			151	0	0	0	0	21.858	21.858	0		0			151	0	0	0	0	29.186	29.186	37.718
		152	0	0	0	0	20.089	20.089	-1.126		1.126			152	0	0	0	0	21.267	21.267	0		0			152	0	0	0	0	21.858	21.858	4.576		-4.576			152	0	0	0	0	8.532	-8.532	-3.053		3.053
		153	0	0	0	0	21.215	21.215	0		0			153	0	0	0	0	21.267	21.267	-1.976		1.976			153	0	0	0	0	17.282	17.282	0		0			153	0	0	0	0	5.479	-5.479	-1.292		1.292
		154	0	0	0	0	21.215	21.215	-3.332		3.332			154	0	0	0	0	23.243	23.243	0		0			154	0	0	0	0	17.282	17.282	0		0			154	0	0	0	0	4.187	-4.187	-2.16		2.16
		155	0	0	0	0	24.547	24.547	0		0			155	0	0	0	0	23.243	23.243	-1.632		1.632			155	0	0	0	0	17.282	17.282	0		0			155	0	0	0	0	2.027	-2.027	-2.907		2.907
		156	0	0	0	0	24.547	24.547	-1.883		1.883			156	0	0	0	0	24.875	24.875	0		0			156	0	0	0	0	17.282	17.282	0		0			156	0	0	0	0	0.88	0.88	-1.829		1.829
		157	0	0	0	0	26.43	26.43	-1.172		1.172			157	0	0	0	0	24.875	24.875	-2.325		2.325			157	0	0	0	0	17.282	17.282	0		0			157	0	0	0	0	2.709	2.709	-4.512		4.512
		158	0	0	0	0	27.602	27.602	-1.231		1.231			158	0	0	0	0	27.2	27.2	0		0			158	0	0	0	0	17.282	17.282	0		0			158	0	0	0	0	7.221	7.221	-2.643		2.643
		159	0	0	0	0	28.833	28.833	0		0			159	0	0	0	0	27.2	27.2	35.582					159	0	0	0	0	17.282	17.282	0		0			159	0	0	0	0	9.864	9.864	-2.756		2.756
		160	0	0	0	0	28.833	28.833	-1.324		1.324			160	0	0	0	0	8.382	-8.382	-1.967		1.967			160	0	0	0	0	17.282	17.282	0		0			160	0	0	0	0	12.62	12.62	-2.65		2.65
		161	0	0	0	0	30.157	30.157	0		0			161	0	0	0	0	6.415	-6.415	-3.18		3.18			161	0	0	0	0	17.282	17.282	0		0			161	0	0	0	0	15.27	15.27	-1.912		1.912
		162	0	0	0	0	30.157	30.157	-1.134		1.134			162	0	0	0	0	3.235	-3.235	-3.445		3.445			162	0	0	0	0	17.282	17.282	0		0			162	0	0	0	0	17.182	17.182	-1.564		1.564
		163	0	0	0	0	31.291	31.291	0		0			163	0	0	0	0	0.21	0.21	-2.162		2.162			163	0	0	0	0	17.282	17.282	-1.807		1.807			163	0	0	0	0	18.746	18.746	0		0
		164	0	0	0	0	31.291	31.291	0		0			164	0	0	0	0	2.372	2.372	-3.392		3.392			164	0	0	0	0	19.089	19.089	0		0			164	0	0	0	0	18.746	18.746	-2.436		2.436
		165	0	0	0	0	31.291	31.291	0		0			165	0	0	0	0	5.764	5.764	-3.192		3.192			165	0	0	0	0	19.089	19.089	0		0			165	0	0	0	0	21.182	21.182	-2.066		2.066
		166	0	0	0	0	31.291	31.291	-1.249		1.249			166	0	0	0	0	8.956	8.956	-2.964		2.964			166	0	0	0	0	19.089	19.089	0		0			166	0	0	0	0	23.248	23.248	-1.837		1.837
		167	0	0	0	0	32.54	32.54	27.355					167	0	0	0	0	11.92	11.92	-2.046		2.046			167	0	0	0	0	19.089	19.089	0		0			167	0	0	0	0	25.085	25.085	-0.681		0.681
		168	0	0	0	0	5.185	5.185	-1.75		1.75			168	0	0	0	0	13.966	13.966	-2.583		2.583			168	0	0	0	0	19.089	19.089	0		0			168	0	0	0	0	25.766	25.766	0		0
		169	0	0	0	0	6.935	6.935	-2.5		2.5			169	0	0	0	0	16.549	16.549	-1.213		1.213			169	0	0	0	0	19.089	19.089	-1.069		1.069			169	0	0	0	0	25.766	25.766	-1.611		1.611
		170	0	0	0	0	9.435	9.435	-2.957		2.957			170	0	0	0	0	17.762	17.762	-2.086		2.086			170	0	0	0	0	20.158	20.158	0		0			170	0	0	0	0	27.377	27.377	0		0
		171	0	0	0	0	12.392	12.392	0		0			171	0	0	0	0	19.848	19.848	-0.911		0.911			171	0	0	0	0	20.158	20.158	0		0			171	0	0	0	0	27.377	27.377	0		0
		172	0	0	0	0	12.392	12.392	-1.738		1.738			172	0	0	0	0	20.759	20.759	-1.35		1.35			172	0	0	0	0	20.158	20.158	-2.101		2.101			172	0	0	0	0	27.377	27.377	-1.446		1.446
		173	0	0	0	0	14.13	14.13	-3.177		3.177			173	0	0	0	0	22.109	22.109	0		0			173	0	0	0	0	22.259	22.259	0		0			173	0	0	0	0	28.823	28.823	42.492
		174	0	0	0	0	17.307	17.307	-1.856		1.856			174	0	0	0	0	22.109	22.109	-2.668		2.668			174	0	0	0	0	22.259	22.259	0		0			174	0	0	0	0	13.669	-13.669	-2.48		2.48
		175	0	0	0	0	19.163	19.163	-1.252		1.252			175	0	0	0	0	24.777	24.777	0		0			175	0	0	0	0	22.259	22.259	27.288					175	0	0	0	0	11.189	-11.189	-3.04		3.04
		176	0	0	0	0	20.415	20.415	-1.813		1.813			176	0	0	0	0	24.777	24.777	0		0			176	0	0	0	0	5.029	-5.029	0.805					176	0	0	0	0	8.149	-8.149	-1.045		1.045
		177	0	0	0	0	22.228	22.228	0		0			177	0	0	0	0	24.777	24.777	0		0			177	0	0	0	0	5.834	-5.834	-1.825		1.825			177	0	0	0	0	7.104	-7.104	-1.85		1.85
		178	0	0	0	0	22.228	22.228	-3.217		3.217			178	0	0	0	0	24.777	24.777	0		0			178	0	0	0	0	4.009	-4.009	-2.033		2.033			178	0	0	0	0	5.254	-5.254	-1.864		1.864
		179	0	0	0	0	25.445	25.445	-1.057		1.057			179	0	0	0	0	24.777	24.777	29.286					179	0	0	0	0	1.976	-1.976	-2.21		2.21			179	0	0	0	0	3.39	-3.39	-1.711		1.711
		180	0	0	0	0	26.502	26.502	0		0			180	0	0	0	0	4.509	-4.509	0		0			180	0	0	0	0	0.234	0.234	-0.749		0.749			180	0	0	0	0	1.679	-1.679	-3.939		3.939
		181	0	0	0	0	26.502	26.502	-2.242		2.242			181	0	0	0	0	4.509	-4.509	-6.641		6.641			181	0	0	0	0	0.983	0.983	-2.731		2.731			181	0	0	0	0	2.26	2.26	-3.017		3.017
		182	0	0	0	0	28.744	28.744	-0.791		0.791			182	0	0	0	0	2.132	2.132	-1.106		1.106			182	0	0	0	0	3.714	3.714	-1.945		1.945			182	0	0	0	0	5.277	5.277	-2.338		2.338
		183	0	0	0	0	29.535	29.535						183	0	0	0	0	3.238	3.238						183	0	0	0	0	5.659	5.659						183	0	0	0	0	7.615	7.615
[truncated: 87 more columns]

## Sheet: Hoja5
																					c											c												c
	Trial#1 - 10dpt
	(PC-ablated)
	4 frames per second
		Tamox 10dpt	ser01						degrees rot	# saccades	speed rotat	speed average		Tamox 10dpt	ser03						degrees rot	# saccades	speed rotat	speed average		Tamox 10dpt	ser07					degrees rot	# saccades	speed rotat	speed average		Tamox 10dpt	ser09						degrees rot	# saccades	speed rotat	speed average		Tamox 10dpt
		1	0	0	0	0	4.972	4.972	-1.6	6	1.6	1.51344		1	0	0	0	0	21.044	21.044	-1.049	6	1.049	1.62497		1	0	0	0	0	10.643	0	0	0	0.279526		1	0	0	0	0	7.672	7.672	0	8	0	1.492		1
		2	0	0	0	0	6.572	6.572	-0.579		0.579			2	0	0	0	0	22.093	22.093	0		0			2	0	0	0	0	10.643	0		0			2	0	0	0	0	7.672	7.672	-2.314		2.314			2
		3	0	0	0	0	7.151	7.151	-1.981		1.981			3	0	0	0	0	22.093	22.093	-1.666		1.666			3	0	0	0	0	10.643	0		0			3	0	0	0	0	9.986	9.986	0		0			3
		4	0	0	0	0	9.132	9.132	-2.459		2.459			4	0	0	0	0	23.759	23.759	-1.968		1.968			4	0	0	0	0	10.643	0		0			4	0	0	0	0	9.986	9.986	-4.335		4.335			4
		5	0	0	0	0	11.591	11.591	-1.687		1.687			5	0	0	0	0	25.727	25.727	0		0			5	0	0	0	0	10.643	0		0			5	0	0	0	0	14.321	14.321	-1.011		1.011			5
		6	0	0	0	0	13.278	13.278	-1.961		1.961			6	0	0	0	0	25.727	25.727	-2.541		2.541			6	0	0	0	0	10.643	0		0			6	0	0	0	0	15.332	15.332	0		0			6
		7	0	0	0	0	15.239	15.239	-1.28		1.28			7	0	0	0	0	28.268	28.268	0		0			7	0	0	0	0	10.643	0		0			7	0	0	0	0	15.332	15.332	23.616					7
		8	0	0	0	0	16.519	16.519	-1.806		1.806			8	0	0	0	0	28.268	28.268	44.097					8	0	0	0	0	10.643	0		0			8	0	0	0	0	8.284	-8.284	-2.11		2.11			8
		9	0	0	0	0	18.325	18.325	-1.709		1.709			9	0	0	0	0	15.829	-15.829	-8.402		8.402			9	0	0	0	0	10.643	0		0			9	0	0	0	0	6.174	-6.174	0		0			9
		10	0	0	0	0	20.034	20.034	-1.056		1.056			10	0	0	0	0	7.427	-7.427	0		0			10	0	0	0	0	10.643	0		0			10	0	0	0	0	6.174	-6.174	0		0			10
		11	0	0	0	0	21.09	21.09	-1.322		1.322			11	0	0	0	0	7.427	-7.427	-7.635		7.635			11	0	0	0	0	10.643	0		0			11	0	0	0	0	6.174	-6.174	-3.995		3.995			11
		12	0	0	0	0	22.412	22.412	-1.745		1.745			12	0	0	0	0	0.208	0.208	-3.833		3.833			12	0	0	0	0	10.643	0		0			12	0	0	0	0	2.179	-2.179	0		0			12
		13	0	0	0	0	24.157	24.157	0		0			13	0	0	0	0	4.041	4.041	-3.348		3.348			13	0	0	0	0	10.643	0		0			13	0	0	0	0	2.179	-2.179	0		0			13
		14	0	0	0	0	24.157	24.157	28.33					14	0	0	0	0	7.389	7.389	-4.979		4.979			14	0	0	0	0	10.643	0		0			14	0	0	0	0	2.179	-2.179	0		0			14
		15	0	0	0	0	4.173	-4.173	-4.848		4.848			15	0	0	0	0	12.368	12.368	8.909					15	0	0	0	0	10.643	0		0			15	0	0	0	0	2.179	-2.179	0		0			15
		16	0	0	0	0	0.675	0.675	-0.432		0.432			16	0	0	0	0	3.459	3.459	0		0			16	0	0	0	0	10.643	0		0			16	0	0	0	0	2.179	-2.179	-8.77		8.77			16
		17	0	0	0	0	1.107	1.107	-2.028		2.028			17	0	0	0	0	3.459	3.459	-10.013		10.013			17	0	0	0	0	10.643	0		0			17	0	0	0	0	6.591	6.591	-1.365		1.365			17
		18	0	0	0	0	3.135	3.135	-2.397		2.397			18	0	0	0	0	13.472	13.472	0		0			18	0	0	0	0	10.643	0		0			18	0	0	0	0	7.956	7.956	0		0			18
		19	0	0	0	0	5.532	5.532	-2.811		2.811			19	0	0	0	0	13.472	13.472	0.946					19	0	0	0	0	10.643	0		0			19	0	0	0	0	7.956	7.956	0		0			19
		20	0	0	0	0	8.343	8.343	-1.213		1.213			20	0	0	0	0	12.526	12.526	0		0			20	0	0	0	0	10.643	0		0			20	0	0	0	0	7.956	7.956	15.362					20
		21	0	0	0	0	9.556	9.556	-1.644		1.644			21	0	0	0	0	12.526	12.526	0		0			21	0	0	0	0	10.643	0		0			21	0	0	0	0	7.406	-7.406	0		0			21
		22	0	0	0	0	11.2	11.2	-2.33		2.33			22	0	0	0	0	12.526	12.526	0		0			22	0	0	0	0	10.643	0		0			22	0	0	0	0	7.406	-7.406	-1.869		1.869			22
		23	0	0	0	0	13.53	13.53	-1.614		1.614			23	0	0	0	0	12.526	12.526	6.004					23	0	0	0	0	10.643	0		0			23	0	0	0	0	5.537	-5.537	-2.421		2.421			23
		24	0	0	0	0	15.144	15.144	-1.81		1.81			24	0	0	0	0	6.522	6.522	0		0			24	0	0	0	0	10.643	0		0			24	0	0	0	0	3.116	-3.116	-1.098		1.098			24
		25	0	0	0	0	16.954	16.954	-2.227		2.227			25	0	0	0	0	6.522	6.522	-4.637		4.637			25	0	0	0	0	10.643	0		0			25	0	0	0	0	2.018	-2.018	0		0			25
		26	0	0	0	0	19.181	19.181	-1.369		1.369			26	0	0	0	0	11.159	11.159	0		0			26	0	0	0	0	10.643	0		0			26	0	0	0	0	2.018	-2.018	0		0			26
		27	0	0	0	0	20.55	20.55	-1.762		1.762			27	0	0	0	0	11.159	11.159	1.99					27	0	0	0	0	10.643	0		0			27	0	0	0	0	2.018	-2.018	-4.312		4.312			27
		28	0	0	0	0	22.312	22.312	-0.053		0.053			28	0	0	0	0	9.169	9.169	-4.15		4.15			28	0	0	0	0	10.643	0		0			28	0	0	0	0	2.294	2.294	-1.357		1.357			28
		29	0	0	0	0	22.365	22.365	-1.46		1.46			29	0	0	0	0	13.319	13.319	-2.973		2.973			29	0	0	0	0	10.643	0		0			29	0	0	0	0	3.651	3.651	-2.087		2.087			29
		30	0	0	0	0	23.825	23.825	0		0			30	0	0	0	0	16.292	16.292	0		0			30	0	0	0	0	10.643	0		0			30	0	0	0	0	5.738	5.738	-3.488		3.488			30
		31	0	0	0	0	23.825	23.825	-2.227		2.227			31	0	0	0	0	16.292	16.292	4.332					31	0	0	0	0	10.643	0		0			31	0	0	0	0	9.226	9.226	0		0			31
		32	0	0	0	0	26.052	26.052	0		0			32	0	0	0	0	11.96	11.96	0		0			32	0	0	0	0	10.643	0		0			32	0	0	0	0	9.226	9.226	-3.13		3.13			32
		33	0	0	0	0	26.052	26.052	-1.561		1.561			33	0	0	0	0	11.96	11.96	0		0			33	0	0	0	0	10.643	-1.345		1.345			33	0	0	0	0	12.356	12.356	0		0			33
		34	0	0	0	0	27.613	27.613	0		0			34	0	0	0	0	11.96	11.96	0		0			34	0	0	0	0	11.988	0		0			34	0	0	0	0	12.356	12.356	0		0			34
		35	0	0	0	0	27.613	27.613	-1.832		1.832			35	0	0	0	0	11.96	11.96	0		0			35	0	0	0	0	11.988	0		0			35	0	0	0	0	12.356	12.356	-2.309		2.309			35
		36	0	0	0	0	29.445	29.445	0		0			36	0	0	0	0	11.96	11.96	0		0			36	0	0	0	0	11.988	0		0			36	0	0	0	0	14.665	14.665	0		0			36
		37	0	0	0	0	29.445	29.445	-1.727		1.727			37	0	0	0	0	11.96	11.96	8.512					37	0	0	0	0	11.988	0		0			37	0	0	0	0	14.665	14.665	-1.211		1.211			37
		38	0	0	0	0	31.172	31.172	0		0			38	0	0	0	0	3.448	3.448	-1.517		1.517			38	0	0	0	0	11.988	0		0			38	0	0	0	0	15.876	15.876	-2.264		2.264			38
		39	0	0	0	0	31.172	31.172	-2.688		2.688			39	0	0	0	0	4.965	4.965	-2.847		2.847			39	0	0	0	0	11.988	0		0			39	0	0	0	0	18.14	18.14	0		0			39
		40	0	0	0	0	33.86	33.86	0		0			40	0	0	0	0	7.812	7.812	-3.442		3.442			40	0	0	0	0	11.988	0		0			40	0	0	0	0	18.14	18.14	0		0			40
		41	0	0	0	0	33.86	33.86	28.116					41	0	0	0	0	11.254	11.254	-2.917		2.917			41	0	0	0	0	11.988	0		0			41	0	0	0	0	18.14	18.14	0		0			41
		42	0	0	0	0	5.744	5.744	0		0			42	0	0	0	0	14.171	14.171	0		0			42	0	0	0	0	11.988	-2.691		2.691			42	0	0	0	0	18.14	18.14	26.158					42
		43	0	0	0	0	5.744	5.744	-4.213		4.213			43	0	0	0	0	14.171	14.171	-2.673		2.673			43	0	0	0	0	14.679	0		0			43	0	0	0	0	8.018	-8.018	-1.472		1.472			43
		44	0	0	0	0	9.957	9.957	-2.17		2.17			44	0	0	0	0	16.844	16.844	-2.352		2.352			44	0	0	0	0	14.679	-2.476		2.476			44	0	0	0	0	6.546	-6.546	-2.56		2.56			44
		45	0	0	0	0	12.127	12.127	2.394					45	0	0	0	0	19.196	19.196	-2.002		2.002			45	0	0	0	0	17.155	12.141					45	0	0	0	0	3.986	-3.986	-0.696		0.696			45
		46	0	0	0	0	9.733	9.733	-1.076		1.076			46	0	0	0	0	21.198	21.198	0		0			46	0	0	0	0	5.014	2.167					46	0	0	0	0	3.29	-3.29	-0.691		0.691			46
		47	0	0	0	0	10.809	10.809	-6.331		6.331			47	0	0	0	0	21.198	21.198	-4.061		4.061			47	0	0	0	0	2.847	-0.71		0.71			47	0	0	0	0	2.599	-2.599	-2.61		2.61			47
		48	0	0	0	0	17.14	17.14	-0.852		0.852			48	0	0	0	0	25.259	25.259	-1.054		1.054			48	0	0	0	0	3.557	-3.503		3.503			48	0	0	0	0	0.011	0.011	-2.639		2.639			48
		49	0	0	0	0	17.992	17.992	-1.218		1.218			49	0	0	0	0	26.313	26.313	0		0			49	0	0	0	0	7.06	-1.368		1.368			49	0	0	0	0	2.65	2.65	0.118					49
		50	0	0	0	0	19.21	19.21	-2.051		2.051			50	0	0	0	0	26.313	26.313	0		0			50	0	0	0	0	8.428	-2.378		2.378			50	0	0	0	0	2.532	2.532	-0.46		0.46			50
		51	0	0	0	0	21.261	21.261	0		0			51	0	0	0	0	26.313	26.313	15.485					51	0	0	0	0	10.806	-1.12		1.12			51	0	0	0	0	2.992	2.992	-1.348		1.348			51
		52	0	0	0	0	21.261	21.261	16.992					52	0	0	0	0	10.828	10.828	20.436					52	0	0	0	0	11.926	0		0			52	0	0	0	0	4.34	4.34	-2.352		2.352			52
		53	0	0	0	0	4.269	4.269	-2.705		2.705			53	0	0	0	0	9.608	-9.608	-3.077		3.077			53	0	0	0	0	11.926	0		0			53	0	0	0	0	6.692	6.692	-1.219		1.219			53
		54	0	0	0	0	6.974	6.974	0		0			54	0	0	0	0	6.531	-6.531	-4.17		4.17			54	0	0	0	0	11.926	0		0			54	0	0	0	0	7.911	7.911	-2.181		2.181			54
		55	0	0	0	0	6.974	6.974	0		0			55	0	0	0	0	2.361	-2.361	0		0			55	0	0	0	0	11.926	0		0			55	0	0	0	0	10.092	10.092	-2.013		2.013			55
		56	0	0	0	0	6.974	6.974	-5.627		5.627			56	0	0	0	0	2.361	-2.361	-2.539		2.539			56	0	0	0	0	11.926	0		0			56	0	0	0	0	12.105	12.105	0		0			56
		57	0	0	0	0	12.601	12.601	3.084					57	0	0	0	0	0.178	0.178	-1.235		1.235			57	0	0	0	0	11.926	0		0			57	0	0	0	0	12.105	12.105	0		0			57
		58	0	0	0	0	9.517	9.517	1.989					58	0	0	0	0	1.413	1.413	-1.591		1.591			58	0	0	0	0	11.926	0		0			58	0	0	0	0	12.105	12.105	-2.86		2.86			58
		59	0	0	0	0	7.528	7.528	1.784					59	0	0	0	0	3.004	3.004	-1.872		1.872			59	0	0	0	0	11.926	0		0			59	0	0	0	0	14.965	14.965	-1.308		1.308			59
		60	0	0	0	0	5.744	5.744	-1.644		1.644			60	0	0	0	0	4.876	4.876	-3.107		3.107			60	0	0	0	0	11.926	0		0			60	0	0	0	0	16.273	16.273	0		0			60
		61	0	0	0	0	7.388	7.388	-6.137		6.137			61	0	0	0	0	7.983	7.983	-2.279		2.279			61	0	0	0	0	11.926	-1.174		1.174			61	0	0	0	0	16.273	16.273	-2.015		2.015			61
		62	0	0	0	0	13.525	13.525	-1.436		1.436			62	0	0	0	0	10.262	10.262	-2.097		2.097			62	0	0	0	0	13.1	0		0			62	0	0	0	0	18.288	18.288	0		0			62
		63	0	0	0	0	14.961	14.961	-1.474		1.474			63	0	0	0	0	12.359	12.359	-1.684		1.684			63	0	0	0	0	13.1	0		0			63	0	0	0	0	18.288	18.288	29.713					63
		64	0	0	0	0	16.435	16.435	0		0			64	0	0	0	0	14.043	14.043	-1.34		1.34			64	0	0	0	0	13.1	0		0			64	0	0	0	0	11.425	-11.425	-1.574		1.574			64
		65	0	0	0	0	16.435	16.435	0		0			65	0	0	0	0	15.383	15.383	-1.438		1.438			65	0	0	0	0	13.1	0		0			65	0	0	0	0	9.851	-9.851	-2.464		2.464			65
		66	0	0	0	0	16.435	16.435	12.957					66	0	0	0	0	16.821	16.821	-1.814		1.814			66	0	0	0	0	13.1	0		0			66	0	0	0	0	7.387	-7.387	-1.636		1.636			66
		67	0	0	0	0	3.478	3.478	2.389					67	0	0	0	0	18.635	18.635	-0.716		0.716			67	0	0	0	0	13.1	0		0			67	0	0	0	0	5.751	-5.751	-10.786		10.786			67
		68	0	0	0	0	1.089	1.089	-3.82		3.82			68	0	0	0	0	19.351	19.351	-2.996		2.996			68	0	0	0	0	13.1	-4.77		4.77			68	0	0	0	0	5.035	5.035	1.623					68
		69	0	0	0	0	4.909	4.909	2.038					69	0	0	0	0	22.347	22.347	-0.818		0.818			69	0	0	0	0	17.87	7.487					69	0	0	0	0	3.412	3.412	1.314					69
		70	0	0	0	0	2.871	2.871	-2.216		2.216			70	0	0	0	0	23.165	23.165	-2.266		2.266			70	0	0	0	0	10.383	2.234					70	0	0	0	0	2.098	2.098	1.847					70
		71	0	0	0	0	5.087	5.087	-3.886		3.886			71	0	0	0	0	25.431	25.431	0		0			71	0	0	0	0	8.149	-2.261		2.261			71	0	0	0	0	0.251	0.251	-0.465		0.465			71
		72	0	0	0	0	8.973	8.973	-3.187		3.187			72	0	0	0	0	25.431	25.431	-2.022		2.022			72	0	0	0	0	10.41	0		0			72	0	0	0	0	0.716	0.716	-2.626		2.626			72
		73	0	0	0	0	12.16	12.16	0		0			73	0	0	0	0	27.453	27.453	0		0			73	0	0	0	0	10.41	-1.55		1.55			73	0	0	0	0	3.342	3.342	-2.261		2.261			73
		74	0	0	0	0	12.16	12.16	3.465		-3.465			74	0	0	0	0	27.453	27.453	0		0			74	0	0	0	0	11.96	0		0			74	0	0	0	0	5.603	5.603	-1.519		1.519			74
		75	0	0	0	0	8.695	8.695	-2.139		2.139			75	0	0	0	0	27.453	27.453	0		0			75	0	0	0	0	11.96	-0.95		0.95			75	0	0	0	0	7.122	7.122	-1.389		1.389			75
		76	0	0	0	0	10.834	10.834	-1.895		1.895			76	0	0	0	0	27.453	27.453	0		0			76	0	0	0	0	12.91	0		0			76	0	0	0	0	8.511	8.511	-3.521		3.521			76
		77	0	0	0	0	12.729	12.729	-2.499		2.499			77	0	0	0	0	27.453	27.453	39.935					77	0	0	0	0	12.91	0		0			77	0	0	0	0	12.032	12.032	0		0			77
		78	0	0	0	0	15.228	15.228	0		0			78	0	0	0	0	12.482	-12.482	-4.618		4.618			78	0	0	0	0	12.91	0		0			78	0	0	0	0	12.032	12.032	-3.016		3.016			78
		79	0	0	0	0	15.228	15.228	-1.403		1.403			79	0	0	0	0	7.864	-7.864	-2.689		2.689			79	0	0	0	0	12.91	0		0			79	0	0	0	0	15.048	15.048	0		0			79
		80	0	0	0	0	16.631	16.631	0		0			80	0	0	0	0	5.175	-5.175	-1.453		1.453			80	0	0	0	0	12.91	0		0			80	0	0	0	0	15.048	15.048	0		0			80
		81	0	0	0	0	16.631	16.631	11.945					81	0	0	0	0	3.722	-3.722	-1.709		1.709			81	0	0	0	0	12.91	0		0			81	0	0	0	0	15.048	15.048	-2.364		2.364			81
		82	0	0	0	0	4.686	4.686	-1.508		1.508			82	0	0	0	0	2.013	-2.013	-2.293		2.293			82	0	0	0	0	12.91	-1.453		1.453			82	0	0	0	0	17.412	17.412	-1.346		1.346			82
		83	0	0	0	0	6.194	6.194	-3.407		3.407			83	0	0	0	0	0.28	0.28	-1.227		1.227			83	0	0	0	0	14.363	0		0			83	0	0	0	0	18.758	18.758	0		0			83
		84	0	0	0	0	9.601	9.601	0		0			84	0	0	0	0	1.507	1.507	-3.805		3.805			84	0	0	0	0	14.363	-2.422		2.422			84	0	0	0	0	18.758	18.758	-0.69		0.69			84
		85	0	0	0	0	9.601	9.601	-1.17		1.17			85	0	0	0	0	5.312	5.312	-1.705		1.705			85	0	0	0	0	16.785	0		0			85	0	0	0	0	19.448	19.448	-1.11		1.11			85
		86	0	0	0	0	10.771	10.771	-2.161		2.161			86	0	0	0	0	7.017	7.017	-2.668		2.668			86	0	0	0	0	16.785	0		0			86	0	0	0	0	20.558	20.558	0		0			86
		87	0	0	0	0	12.932	12.932	-2.952		2.952			87	0	0	0	0	9.685	9.685	-1.746		1.746			87	0	0	0	0	16.785	0		0			87	0	0	0	0	20.558	20.558	31.53					87
		88	0	0	0	0	15.884	15.884	-1.029		1.029			88	0	0	0	0	11.431	11.431	-2.615		2.615			88	0	0	0	0	16.785	10.858					88	0	0	0	0	10.972	-10.972	-2.216		2.216			88
		89	0	0	0	0	16.913	16.913	-2.488		2.488			89	0	0	0	0	14.046	14.046	0		0			89	0	0	0	0	5.927	0		0			89	0	0	0	0	8.756	-8.756	0		0			89
		90	0	0	0	0	19.401	19.401	0		0			90	0	0	0	0	14.046	14.046	-1.795		1.795			90	0	0	0	0	5.927	-9.97		9.97			90	0	0	0	0	8.756	-8.756	-2.832		2.832			90
		91	0	0	0	0	19.401	19.401	-1.846		1.846			91	0	0	0	0	15.841	15.841	-2.368		2.368			91	0	0	0	0	15.897	0		0			91	0	0	0	0	5.924	-5.924	-2.384		2.384			91
		92	0	0	0	0	21.247	21.247	-1.551		1.551			92	0	0	0	0	18.209	18.209	-1.442		1.442			92	0	0	0	0	15.897	0		0			92	0	0	0	0	3.54	-3.54	-0.985		0.985			92
		93	0	0	0	0	22.798	22.798	0		0			93	0	0	0	0	19.651	19.651	-0.658		0.658			93	0	0	0	0	15.897	0		0			93	0	0	0	0	2.555	-2.555	-2.649		2.649			93
		94	0	0	0	0	22.798	22.798	-1.464		1.464			94	0	0	0	0	20.309	20.309	-1.883		1.883			94	0	0	0	0	15.897	1.393					94	0	0	0	0	0.094	0.094	-1.778		1.778			94
		95	0	0	0	0	24.262	24.262	0		0			95	0	0	0	0	22.192	22.192	-1.606		1.606			95	0	0	0	0	14.504	0		0			95	0	0	0	0	1.872	1.872	-1.374		1.374			95
		96	0	0	0	0	24.262	24.262	24.115					96	0	0	0	0	23.798	23.798	-1.261		1.261			96	0	0	0	0	14.504	-1.509		1.509			96	0	0	0	0	3.246	3.246	-2.22		2.22			96
		97	0	0	0	0	0.147	0.147	-1.591		1.591			97	0	0	0	0	25.059	25.059	0		0			97	0	0	0	0	16.013	-2.042		2.042			97	0	0	0	0	5.466	5.466	-2.136		2.136			97
		98	0	0	0	0	1.738	1.738	-7.224		7.224			98	0	0	0	0	25.059	25.059	0		0			98	0	0	0	0	18.055	1.028					98	0	0	0	0	7.602	7.602	0		0			98
		99	0	0	0	0	8.962	8.962	-2.607		2.607			99	0	0	0	0	25.059	25.059	-0.46		0.46			99	0	0	0	0	17.027	0		0			99	0	0	0	0	7.602	7.602	0		0			99
		100	0	0	0	0	11.569	11.569	3.562					100	0	0	0	0	25.519	25.519	0		0			100	0	0	0	0	17.027	0		0			100	0	0	0	0	7.602	7.602	-1.717		1.717			100
		101	0	0	0	0	8.007	8.007	0		0			101	0	0	0	0	25.519	25.519	-2.522		2.522			101	0	0	0	0	17.027	0		0			101	0	0	0	0	9.319	9.319	-1.88		1.88			101
		102	0	0	0	0	8.007	8.007	6.541					102	0	0	0	0	28.041	28.041	0		0			102	0	0	0	0	17.027	0		0			102	0	0	0	0	11.199	11.199	-1.504		1.504			102
		103	0	0	0	0	1.466	1.466	0		0			103	0	0	0	0	28.041	28.041	37.411					103	0	0	0	0	17.027	0		0			103	0	0	0	0	12.703	12.703	0		0			103
		104	0	0	0	0	1.466	1.466	-0.241		0.241			104	0	0	0	0	9.37	-9.37	-3.347		3.347			104	0	0	0	0	17.027	0		0			104	0	0	0	0	12.703	12.703	-3.683		3.683			104
		105	0	0	0	0	1.707	1.707	0		0			105	0	0	0	0	6.023	-6.023	-2.924		2.924			105	0	0	0	0	17.027	-4.107		4.107			105	0	0	0	0	16.386	16.386	0		0			105
		106	0	0	0	0	1.707	1.707	0		0			106	0	0	0	0	3.099	-3.099	-4.853		4.853			106	0	0	0	0	21.134	0		0			106	0	0	0	0	16.386	16.386	-4.649		4.649			106
		107	0	0	0	0	1.707	1.707	-2.959		2.959			107	0	0	0	0	1.754	1.754	-0.827		0.827			107	0	0	0	0	21.134	0		0			107	0	0	0	0	21.035	21.035	0		0			107
		108	0	0	0	0	4.666	4.666	-6.972		6.972			108	0	0	0	0	2.581	2.581	-1.303		1.303			108	0	0	0	0	21.134	0		0			108	0	0	0	0	21.035	21.035	0		0			108
		109	0	0	0	0	11.638	11.638	4.782					109	0	0	0	0	3.884	3.884	-6.073		6.073			109	0	0	0	0	21.134	1.089					109	0	0	0	0	21.035	21.035	32.566					109
		110	0	0	0	0	6.856	6.856	-2.734		2.734			110	0	0	0	0	9.957	9.957	-2.168		2.168			110	0	0	0	0	20.045	0		0			110	0	0	0	0	11.531	-11.531	-1.754		1.754			110
		111	0	0	0	0	9.59	9.59	0		0			111	0	0	0	0	12.125	12.125	-2.17		2.17			111	0	0	0	0	20.045	0		0			111	0	0	0	0	9.777	-9.777	-1.098		1.098			111
		112	0	0	0	0	9.59	9.59	0		0			112	0	0	0	0	14.295	14.295	-1.305		1.305			112	0	0	0	0	20.045	0		0			112	0	0	0	0	8.679	-8.679	-1.377		1.377			112
		113	0	0	0	0	9.59	9.59	-0.815		0.815			113	0	0	0	0	15.6	15.6	-1.085		1.085			113	0	0	0	0	20.045	0.806					113	0	0	0	0	7.302	-7.302	-1.381		1.381			113
		114	0	0	0	0	10.405	10.405	-1.686		1.686			114	0	0	0	0	16.685	16.685	-1.108		1.108			114	0	0	0	0	19.239	0		0			114	0	0	0	0	5.921	-5.921	-0.768		0.768			114
		115	0	0	0	0	12.091	12.091	0		0			115	0	0	0	0	17.793	17.793	-2.685		2.685			115	0	0	0	0	19.239	0		0			115	0	0	0	0	5.153	-5.153	-1.004		1.004			115
		116	0	0	0	0	12.091	12.091	-1.274		1.274			116	0	0	0	0	20.478	20.478	0		0			116	0	0	0	0	19.239	0		0			116	0	0	0	0	4.149	-4.149	-1.436		1.436			116
		117	0	0	0	0	13.365	13.365	-1.512		1.512			117	0	0	0	0	20.478	20.478	-2.769		2.769			117	0	0	0	0	19.239	0		0			117	0	0	0	0	2.713	-2.713	-2.999		2.999			117
		118	0	0	0	0	14.877	14.877	-1.798		1.798			118	0	0	0	0	23.247	23.247	0		0			118	0	0	0	0	19.239	0		0			118	0	0	0	0	0.286	0.286	-0.984		0.984			118
		119	0	0	0	0	16.675	16.675	0		0			119	0	0	0	0	23.247	23.247	0		0			119	0	0	0	0	19.239	2.751					119	0	0	0	0	1.27	1.27	-2.177		2.177			119
		120	0	0	0	0	16.675	16.675	20.111					120	0	0	0	0	23.247	23.247	0		0			120	0	0	0	0	16.488	0		0			120	0	0	0	0	3.447	3.447	-0.503		0.503			120
		121	0	0	0	0	3.436	-3.436	-3.796		3.796			121	0	0	0	0	23.247	23.247	-2.106		2.106			121	0	0	0	0	16.488	0		0			121	0	0	0	0	3.95	3.95	-2.037		2.037			121
		122	0	0	0	0	0.36	0.36	-0.828		0.828			122	0	0	0	0	25.353	25.353	0		0			122	0	0	0	0	16.488	0		0			122	0	0	0	0	5.987	5.987	-2.281		2.281			122
		123	0	0	0	0	1.188	1.188	0.353					123	0	0	0	0	25.353	25.353	-2.19		2.19			123	0	0	0	0	16.488	0		0			123	0	0	0	0	8.268	8.268	0		0			123
		124	0	0	0	0	0.835	0.835	-2.99		2.99			124	0	0	0	0	27.543	27.543	0		0			124	0	0	0	0	16.488	0		0			124	0	0	0	0	8.268	8.268	-1.263		1.263			124
		125	0	0	0	0	3.825	3.825	-1.499		1.499			125	0	0	0	0	27.543	27.543	0		0			125	0	0	0	0	16.488	0		0			125	0	0	0	0	9.531	9.531	0		0			125
		126	0	0	0	0	5.324	5.324	-3.541		3.541			126	0	0	0	0	27.543	27.543	0		0			126	0	0	0	0	16.488	0		0			126	0	0	0	0	9.531	9.531	-1.807		1.807			126
		127	0	0	0	0	8.865	8.865	-1.087		1.087			127	0	0	0	0	27.543	27.543	0		0			127	0	0	0	0	16.488	0		0			127	0	0	0	0	11.338	11.338	-1.764		1.764			127
		128	0	0	0	0	9.952	9.952	-2.453		2.453			128	0	0	0	0	27.543	27.543	0		0			128	0	0	0	0	16.488	0		0			128	0	0	0	0	13.102	13.102	-3.101		3.101			128
		129	0	0	0	0	12.405	12.405	-1.049		1.049			129	0	0	0	0	27.543	27.543	35.466					129	0	0	0	0	16.488	0		0			129	0	0	0	0	16.203	16.203	-2.597		2.597			129
		130	0	0	0	0	13.454	13.454	0		0			130	0	0	0	0	7.923	-7.923	-3.259		3.259			130	0	0	0	0	16.488	0		0			130	0	0	0	0	18.8	18.8	-2.413		2.413			130
		131	0	0	0	0	13.454	13.454	-2.374		2.374			131	0	0	0	0	4.664	-4.664	0		0			131	0	0	0	0	16.488	0		0			131	0	0	0	0	21.213	21.213	0		0			131
		132	0	0	0	0	15.828	15.828	0		0			132	0	0	0	0	4.664	-4.664	-2.842		2.842			132	0	0	0	0	16.488	0		0			132	0	0	0	0	21.213	21.213	0		0			132
		133	0	0	0	0	15.828	15.828	-2.237		2.237			133	0	0	0	0	1.822	-1.822	-6.928		6.928			133	0	0	0	0	16.488	0		0			133	0	0	0	0	21.213	21.213	-2.645		2.645			133
		134	0	0	0	0	18.065	18.065	25.764					134	0	0	0	0	5.106	5.106	-4.005		4.005			134	0	0	0	0	16.488	0		0			134	0	0	0	0	23.858	23.858	36.161					134
		135	0	0	0	0	7.699	-7.699	0		0			135	0	0	0	0	9.111	9.111	0		0			135	0	0	0	0	16.488	0		0			135	0	0	0	0	12.303	-12.303	0		0			135
		136	0	0	0	0	7.699	-7.699	-1.23		1.23			136	0	0	0	0	9.111	9.111	0		0			136	0	0	0	0	16.488	0		0			136	0	0	0	0	12.303	-12.303	-2.374		2.374			136
		137	0	0	0	0	6.469	-6.469	-1.722		1.722			137	0	0	0	0	9.111	9.111	0		0			137	0	0	0	0	16.488	0		0			137	0	0	0	0	9.929	-9.929	-1.368		1.368			137
		138	0	0	0	0	4.747	-4.747	-1.074		1.074			138	0	0	0	0	9.111	9.111	0		0			138	0	0	0	0	16.488	0		0			138	0	0	0	0	8.561	-8.561	-2.614		2.614			138
		139	0	0	0	0	3.673	-3.673	-3.754		3.754			139	0	0	0	0	9.111	9.111	4.547					139	0	0	0	0	16.488	0		0			139	0	0	0	0	5.947	-5.947	-1.509		1.509			139
		140	0	0	0	0	0.081	0.081	0		0			140	0	0	0	0	4.564	4.564	-1.677		1.677			140	0	0	0	0	16.488	0		0			140	0	0	0	0	4.438	-4.438	-0.947		0.947			140
		141	0	0	0	0	0.081	0.081	-1.47		1.47			141	0	0	0	0	6.241	6.241	-2.285		2.285			141	0	0	0	0	16.488	0		0			141	0	0	0	0	3.491	-3.491	0		0			141
		142	0	0	0	0	1.551	1.551	-3.031		3.031			142	0	0	0	0	8.526	8.526	-2.925		2.925			142	0	0	0	0	16.488	0		0			142	0	0	0	0	3.491	-3.491	-4.638		4.638			142
		143	0	0	0	0	4.582	4.582	-1.863		1.863			143	0	0	0	0	11.451	11.451	-2.644		2.644			143	0	0	0	0	16.488	0		0			143	0	0	0	0	1.147	1.147	-1.115		1.115			143
		144	0	0	0	0	6.445	6.445	-2.38		2.38			144	0	0	0	0	14.095	14.095	-1.513		1.513			144	0	0	0	0	16.488	0		0			144	0	0	0	0	2.262	2.262	-3.022		3.022			144
		145	0	0	0	0	8.825	8.825	-0.297		0.297			145	0	0	0	0	15.608	15.608	-1.062		1.062			145	0	0	0	0	16.488	0		0			145	0	0	0	0	5.284	5.284	-2.122		2.122			145
		146	0	0	0	0	9.122	9.122	-0.913		0.913			146	0	0	0	0	16.67	16.67	0		0			146	0	0	0	0	16.488	0		0			146	0	0	0	0	7.406	7.406	-1.274		1.274			146
		147	0	0	0	0	10.035	10.035	-1.82		1.82			147	0	0	0	0	16.67	16.67	-1.77		1.77			147	0	0	0	0	16.488	0		0			147	0	0	0	0	8.68	8.68	-1.845		1.845			147
		148	0	0	0	0	11.855	11.855	-1.591		1.591			148	0	0	0	0	18.44	18.44	-1.771		1.771			148	0	0	0	0	16.488	0		0			148	0	0	0	0	10.525	10.525	-0.774		0.774			148
		149	0	0	0	0	13.446	13.446	-1.473		1.473			149	0	0	0	0	20.211	20.211	-2.302		2.302			149	0	0	0	0	16.488	0		0			149	0	0	0	0	11.299	11.299	-1.505		1.505			149
		150	0	0	0	0	14.919	14.919	0		0			150	0	0	0	0	22.513	22.513	-1.033		1.033			150	0	0	0	0	16.488	0		0			150	0	0	0	0	12.804	12.804	-1.07		1.07			150
		151	0	0	0	0	14.919	14.919	-1.861		1.861			151	0	0	0	0	23.546	23.546	0		0			151	0	0	0	0	16.488	0		0			151	0	0	0	0	13.874	13.874	0		0			151
		152	0	0	0	0	16.78	16.78	0		0			152	0	0	0	0	23.546	23.546	-1.811		1.811			152	0	0	0	0	16.488	0		0			152	0	0	0	0	13.874	13.874	-2.296		2.296			152
		153	0	0	0	0	16.78	16.78	-4.076		4.076			153	0	0	0	0	25.357	25.357	0		0			153	0	0	0	0	16.488	0		0			153	0	0	0	0	16.17	16.17	0		0			153
		154	0	0	0	0	20.856	20.856	0		0			154	0	0	0	0	25.357	25.357	-1.785		1.785			154	0	0	0	0	16.488	0		0			154	0	0	0	0	16.17	16.17	-1.606		1.606			154
		155	0	0	0	0	20.856	20.856	-1.429		1.429			155	0	0	0	0	27.142	27.142	0		0			155	0	0	0	0	16.488	0		0			155	0	0	0	0	17.776	17.776	0		0			155
		156	0	0	0	0	22.285	22.285	0		0			156	0	0	0	0	27.142	27.142	0		0			156	0	0	0	0	16.488	0		0			156	0	0	0	0	17.776	17.776	-4.173		4.173			156
		157	0	0	0	0	22.285	22.285	0		0			157	0	0	0	0	27.142	27.142	0		0			157	0	0	0	0	16.488	0		0			157	0	0	0	0	21.949	21.949	0		0			157
		158	0	0	0	0	22.285	22.285	28.841					158	0	0	0	0	27.142	27.142	34.985					158	0	0	0	0	16.488	0		0			158	0	0	0	0	21.949	21.949	-1.673		1.673			158
		159	0	0	0	0	6.556	-6.556	-6.565		6.565			159	0	0	0	0	7.843	-7.843	-3.799		3.799			159	0	0	0	0	16.488	0		0			159	0	0	0	0	23.622	23.622	-2.295		2.295			159
		160	0	0	0	0	0.009	0.009	-0.615		0.615			160	0	0	0	0	4.044	-4.044	-4.773		4.773			160	0	0	0	0	16.488	0		0			160	0	0	0	0	25.917	25.917	35.727					160
		161	0	0	0	0	0.624	0.624	-0.761		0.761			161	0	0	0	0	0.729	0.729	0.513					161	0	0	0	0	16.488	0		0			161	0	0	0	0	9.81	-9.81	0		0			161
		162	0	0	0	0	1.385	1.385	-1.715		1.715			162	0	0	0	0	0.216	0.216	-2.667		2.667			162	0	0	0	0	16.488	0		0			162	0	0	0	0	9.81	-9.81	-1.935		1.935			162
		163	0	0	0	0	3.1	3.1	-2.29		2.29			163	0	0	0	0	2.883	2.883	-2.403		2.403			163	0	0	0	0	16.488	0		0			163	0	0	0	0	7.875	-7.875	-2.284		2.284			163
		164	0	0	0	0	5.39	5.39	0		0			164	0	0	0	0	5.286	5.286	0		0			164	0	0	0	0	16.488	0		0			164	0	0	0	0	5.591	-5.591	-1.414		1.414			164
		165	0	0	0	0	5.39	5.39	-1.002		1.002			165	0	0	0	0	5.286	5.286	-2.333		2.333			165	0	0	0	0	16.488	0		0			165	0	0	0	0	4.177	-4.177	-1.509		1.509			165
		166	0	0	0	0	6.392	6.392	-1.545		1.545			166	0	0	0	0	7.619	7.619	0		0			166	0	0	0	0	16.488	0		0			166	0	0	0	0	2.668	-2.668	-2.708		2.708			166
		167	0	0	0	0	7.937	7.937	-2.335		2.335			167	0	0	0	0	7.619	7.619	7.331					167	0	0	0	0	16.488	0		0			167	0	0	0	0	0.04	0.04	-1.545		1.545			167
		168	0	0	0	0	10.272	10.272	-2.706		2.706			168	0	0	0	0	0.288	0.288	0		0			168	0	0	0	0	16.488	0		0			168	0	0	0	0	1.585	1.585	0		0			168
		169	0	0	0	0	12.978	12.978	0		0			169	0	0	0	0	0.288	0.288	0		0			169	0	0	0	0	16.488	0		0			169	0	0	0	0	1.585	1.585	-1.441		1.441			169
		170	0	0	0	0	12.978	12.978	-1.589		1.589			170	0	0	0	0	0.288	0.288	-2.769		2.769			170	0	0	0	0	16.488	0		0			170	0	0	0	0	3.026	3.026	-2.143		2.143			170
		171	0	0	0	0	14.567	14.567	-2.104		2.104			171	0	0	0	0	3.057	3.057	0		0			171	0	0	0	0	16.488	0		0			171	0	0	0	0	5.169	5.169	-1.734		1.734			171
		172	0	0	0	0	16.671	16.671	-1.554		1.554			172	0	0	0	0	3.057	3.057	-3.905		3.905			172	0	0	0	0	16.488	0		0			172	0	0	0	0	6.903	6.903	-2.568		2.568			172
		173	0	0	0	0	18.225	18.225	-1.493		1.493			173	0	0	0	0	6.962	6.962	-1.538		1.538			173	0	0	0	0	16.488	0		0			173	0	0	0	0	9.471	9.471	-2.214		2.214			173
		174	0	0	0	0	19.718	19.718	0		0			174	0	0	0	0	8.5	8.5	-2.817		2.817			174	0	0	0	0	16.488	0		0			174	0	0	0	0	11.685	11.685	-1.24		1.24			174
		175	0	0	0	0	19.718	19.718	-1.482		1.482			175	0	0	0	0	11.317	11.317	-2.317		2.317			175	0	0	0	0	16.488	0		0			175	0	0	0	0	12.925	12.925	-2.668		2.668			175
		176	0	0	0	0	21.2	21.2	-1.583		1.583			176	0	0	0	0	13.634	13.634	-0.294		0.294			176	0	0	0	0	16.488	0		0			176	0	0	0	0	15.593	15.593	-1.568		1.568			176
		177	0	0	0	0	22.783	22.783	0		0			177	0	0	0	0	13.928	13.928	0		0			177	0	0	0	0	16.488	0		0			177	0	0	0	0	17.161	17.161	-0.857		0.857			177
		178	0	0	0	0	22.783	22.783	-1.736		1.736			178	0	0	0	0	13.928	13.928	-2.598		2.598			178	0	0	0	0	16.488	0		0			178	0	0	0	0	18.018	18.018	-1.939		1.939			178
		179	0	0	0	0	24.519	24.519	0		0			179	0	0	0	0	16.526	16.526	0		0			179	0	0	0	0	16.488	0		0			179	0	0	0	0	19.957	19.957	-2.63		2.63			179
		180	0	0	0	0	24.519	24.519	0		0			180	0	0	0	0	16.526	16.526	-1.397		1.397			180	0	0	0	0	16.488	0		0			180	0	0	0	0	22.587	22.587	-0.301		0.301			180
		181	0	0	0	0	24.519	24.519	0		0			181	0	0	0	0	17.923	17.923	-1.967		1.967			181	0	0	0	0	16.488	0		0			181	0	0	0	0	22.888	22.888	-1.197		1.197			181
		182	0	0	0	0	24.519	24.519	-1.057		1.057			182	0	0	0	0	19.89	19.89	0		0			182	0	0	0	0	16.488	13.775					182	0	0	0	0	24.085	24.085	33.203					182
		183	0	0	0	0	25.576	25.576						183	0	0	0	0	19.89	19.89						183	0	0	0	0	2.713						183	0	0	0	0	9.118	-9.118						183
[truncated: 86 more columns]
