# Supplementary material for: Lifelong regeneration of cerebellar Purkinje cells after induced cell ablation in zebrafish
Source: eLife. 2023 Apr 12;12:e79672. doi: 10.7554/eLife.79672 (PMC10147380; doi:10.7554/eLife.79672)
Supplement: Figure 4—source data 2. [file elife-79672-fig4-data2.xlsx]

## Sheet: Hoja1
Trial#2 - 2dpt
(control)
4 frames per second
	EtOH 2dpt	ser04						degrees rot	# saccades	speed rotat	speed average		EtOH 2dpt	ser05						degrees rot	# saccades	speed rotat	speed average		EtOH 2dpt	ser06						degrees rot	# saccades	speed rotat	speed average		EtOH 2dpt	ser08						degrees rot	# saccades	speed rotat	speed average		EtOH 2dpt
	1	0	0	0	0	24.7	24.7	-1.683	7	1.683	1.46565		1	0	0	0	0	0.165	0.165	-2.249	3	2.249	1.00616		1	0	0	0	0	20.142	20.142	-0.648	4	0.648	0.799057		1	0	0	0	0	1.779	1.779	-1.591	8	1.591	1.23743		1
	2	0	0	0	0	26.383	26.383	-1.785		1.785			2	0	0	0	0	2.414	2.414	-1.055		1.055			2	0	0	0	0	20.79	20.79	0		0			2	0	0	0	0	3.37	3.37	-1.162		1.162			2
	3	0	0	0	0	28.168	28.168	-1.978		1.978			3	0	0	0	0	3.469	3.469	-1.152		1.152			3	0	0	0	0	20.79	20.79	17.196					3	0	0	0	0	4.532	4.532	0		0			3
	4	0	0	0	0	30.146	30.146	-1.207		1.207			4	0	0	0	0	4.621	4.621	-2.689		2.689			4	0	0	0	0	3.594	3.594	-5.333		5.333			4	0	0	0	0	4.532	4.532	16.219					4
	5	0	0	0	0	31.353	31.353	-1.134		1.134			5	0	0	0	0	7.31	7.31	-1.33		1.33			5	0	0	0	0	8.927	8.927	-1.776		1.776			5	0	0	0	0	11.687	-11.687	0		0			5
	6	0	0	0	0	32.487	32.487	0		0			6	0	0	0	0	8.64	8.64	-1.29		1.29			6	0	0	0	0	10.703	10.703	-2.162		2.162			6	0	0	0	0	11.687	-11.687	-1.531		1.531			6
	7	0	0	0	0	32.487	32.487	-1.344		1.344			7	0	0	0	0	9.93	9.93	0		0			7	0	0	0	0	12.865	12.865	-2.131		2.131			7	0	0	0	0	10.156	-10.156	-2.537		2.537			7
	8	0	0	0	0	33.831	33.831	-1.342		1.342			8	0	0	0	0	9.93	9.93	-1.688		1.688			8	0	0	0	0	14.996	14.996	-1.589		1.589			8	0	0	0	0	7.619	-7.619	-1.263		1.263			8
	9	0	0	0	0	35.173	35.173	-0.895		0.895			9	0	0	0	0	11.618	11.618	0		0			9	0	0	0	0	16.585	16.585	-1.634		1.634			9	0	0	0	0	6.356	-6.356	-1.985		1.985			9
	10	0	0	0	0	36.068	36.068	-0.964		0.964			10	0	0	0	0	11.618	11.618	11.38					10	0	0	0	0	18.219	18.219	-1.982		1.982			10	0	0	0	0	4.371	-4.371	-1.865		1.865			10
	11	0	0	0	0	37.032	37.032	40.499					11	0	0	0	0	0.238	0.238	0		0			11	0	0	0	0	20.201	20.201	0		0			11	0	0	0	0	2.506	-2.506	-2.531		2.531			11
	12	0	0	0	0	3.467	-3.467	-3.481		3.481			12	0	0	0	0	0.238	0.238	-1.84		1.84			12	0	0	0	0	20.201	20.201	-1.552		1.552			12	0	0	0	0	0.025	0.025	-1.177		1.177			12
	13	0	0	0	0	0.014	0.014	-1.549		1.549			13	0	0	0	0	2.078	2.078	-1.732		1.732			13	0	0	0	0	21.753	21.753	-2.101		2.101			13	0	0	0	0	1.202	1.202	-1.53		1.53			13
	14	0	0	0	0	1.563	1.563	-1.381		1.381			14	0	0	0	0	3.81	3.81	-1.248		1.248			14	0	0	0	0	23.854	23.854	0		0			14	0	0	0	0	2.732	2.732	-0.972		0.972			14
	15	0	0	0	0	2.944	2.944	-2.738		2.738			15	0	0	0	0	5.058	5.058	-0.975		0.975			15	0	0	0	0	23.854	23.854	0		0			15	0	0	0	0	3.704	3.704	-2.281		2.281			15
	16	0	0	0	0	5.682	5.682	-2.426		2.426			16	0	0	0	0	6.033	6.033	-0.546		0.546			16	0	0	0	0	23.854	23.854	-1.012		1.012			16	0	0	0	0	5.985	5.985	-0.715		0.715			16
	17	0	0	0	0	8.108	8.108	-2.031		2.031			17	0	0	0	0	6.579	6.579	0		0			17	0	0	0	0	24.866	24.866	0		0			17	0	0	0	0	6.7	6.7	-1.842		1.842			17
	18	0	0	0	0	10.139	10.139	-1.522		1.522			18	0	0	0	0	6.579	6.579	-1.984		1.984			18	0	0	0	0	24.866	24.866	0		0			18	0	0	0	0	8.542	8.542	-1.913		1.913			18
	19	0	0	0	0	11.661	11.661	-2.686		2.686			19	0	0	0	0	8.563	8.563	-2.192		2.192			19	0	0	0	0	24.866	24.866	-1.839		1.839			19	0	0	0	0	10.455	10.455	-1.493		1.493			19
	20	0	0	0	0	14.347	14.347	-1.498		1.498			20	0	0	0	0	10.755	10.755	0		0			20	0	0	0	0	26.705	26.705	0		0			20	0	0	0	0	11.948	11.948	-1.243		1.243			20
	21	0	0	0	0	15.845	15.845	-0.817		0.817			21	0	0	0	0	10.755	10.755	-1.176		1.176			21	0	0	0	0	26.705	26.705	32.345					21	0	0	0	0	13.191	13.191	-1.045		1.045			21
	22	0	0	0	0	16.662	16.662	0		0			22	0	0	0	0	11.931	11.931	0		0			22	0	0	0	0	5.64	-5.64	-2.505		2.505			22	0	0	0	0	14.236	14.236	0		0			22
	23	0	0	0	0	16.662	16.662	-1.893		1.893			23	0	0	0	0	11.931	11.931	-2.403		2.403			23	0	0	0	0	3.135	-3.135	-0.632		0.632			23	0	0	0	0	14.236	14.236	-2.033		2.033			23
	24	0	0	0	0	18.555	18.555	-1.926		1.926			24	0	0	0	0	14.334	14.334	-1.032		1.032			24	0	0	0	0	2.503	-2.503	-2.915		2.915			24	0	0	0	0	16.269	16.269	-1.747		1.747			24
	25	0	0	0	0	20.481	20.481	-1.787		1.787			25	0	0	0	0	15.366	15.366	0		0			25	0	0	0	0	0.412	0.412	-2.385		2.385			25	0	0	0	0	18.016	18.016	0		0			25
	26	0	0	0	0	22.268	22.268	-1.38		1.38			26	0	0	0	0	15.366	15.366	0		0			26	0	0	0	0	2.797	2.797	-1.494		1.494			26	0	0	0	0	18.016	18.016	32.808					26
	27	0	0	0	0	23.648	23.648	-1.811		1.811			27	0	0	0	0	15.366	15.366	15.215					27	0	0	0	0	4.291	4.291	-1.772		1.772			27	0	0	0	0	14.792	-14.792	-1.28		1.28			27
	28	0	0	0	0	25.459	25.459	-1.509		1.509			28	0	0	0	0	0.151	0.151	-2.929		2.929			28	0	0	0	0	6.063	6.063	-2.685		2.685			28	0	0	0	0	13.512	-13.512	-3.039		3.039			28
	29	0	0	0	0	26.968	26.968	-1.77		1.77			29	0	0	0	0	3.08	3.08	-2.049		2.049			29	0	0	0	0	8.748	8.748	-1.242		1.242			29	0	0	0	0	10.473	-10.473	-1.917		1.917			29
	30	0	0	0	0	28.738	28.738	-1.017		1.017			30	0	0	0	0	5.129	5.129	-0.836		0.836			30	0	0	0	0	9.99	9.99	-1.729		1.729			30	0	0	0	0	8.556	-8.556	-1.586		1.586			30
	31	0	0	0	0	29.755	29.755	0		0			31	0	0	0	0	5.965	5.965	-0.498		0.498			31	0	0	0	0	11.719	11.719	-0.853		0.853			31	0	0	0	0	6.97	-6.97	-2.57		2.57			31
	32	0	0	0	0	29.755	29.755	-2.877		2.877			32	0	0	0	0	6.463	6.463	-1.485		1.485			32	0	0	0	0	12.572	12.572	-1.184		1.184			32	0	0	0	0	4.4	-4.4	-0.972		0.972			32
	33	0	0	0	0	32.632	32.632	0		0			33	0	0	0	0	7.948	7.948	-1.036		1.036			33	0	0	0	0	13.756	13.756	-1.954		1.954			33	0	0	0	0	3.428	-3.428	-1.372		1.372			33
	34	0	0	0	0	32.632	32.632	-0.423		0.423			34	0	0	0	0	8.984	8.984	-1.401		1.401			34	0	0	0	0	15.71	15.71	-1.442		1.442			34	0	0	0	0	2.056	-2.056	-2.193		2.193			34
	35	0	0	0	0	33.055	33.055	0		0			35	0	0	0	0	10.385	10.385	-1.509		1.509			35	0	0	0	0	17.152	17.152	-0.863		0.863			35	0	0	0	0	0.137	0.137	-1.501		1.501			35
	36	0	0	0	0	33.055	33.055	0		0			36	0	0	0	0	11.894	11.894	0		0			36	0	0	0	0	18.015	18.015	-1.387		1.387			36	0	0	0	0	1.638	1.638	-2.176		2.176			36
	37	0	0	0	0	33.055	33.055	35.062					37	0	0	0	0	11.894	11.894	-1.773		1.773			37	0	0	0	0	19.402	19.402	-1.678		1.678			37	0	0	0	0	3.814	3.814	-2.363		2.363			37
	38	0	0	0	0	2.007	-2.007	-3.925		3.925			38	0	0	0	0	13.667	13.667	0		0			38	0	0	0	0	21.08	21.08	0		0			38	0	0	0	0	6.177	6.177	-2.085		2.085			38
	39	0	0	0	0	1.918	1.918	-1.185		1.185			39	0	0	0	0	13.667	13.667	-1.278		1.278			39	0	0	0	0	21.08	21.08	-2.157		2.157			39	0	0	0	0	8.262	8.262	-0.859		0.859			39
	40	0	0	0	0	3.103	3.103	-1.476		1.476			40	0	0	0	0	14.945	14.945	0		0			40	0	0	0	0	23.237	23.237	0		0			40	0	0	0	0	9.121	9.121	-1.37		1.37			40
	41	0	0	0	0	4.579	4.579	-2.546		2.546			41	0	0	0	0	14.945	14.945	0		0			41	0	0	0	0	23.237	23.237	0		0			41	0	0	0	0	10.491	10.491	-1.472		1.472			41
	42	0	0	0	0	7.125	7.125	-1.64		1.64			42	0	0	0	0	14.945	14.945	18.966					42	0	0	0	0	23.237	23.237	0		0			42	0	0	0	0	11.963	11.963	-0.881		0.881			42
	43	0	0	0	0	8.765	8.765	-1.716		1.716			43	0	0	0	0	4.021	-4.021	-4.362		4.362			43	0	0	0	0	23.237	23.237	22.802					43	0	0	0	0	12.844	12.844	-1.61		1.61			43
	44	0	0	0	0	10.481	10.481	-2.233		2.233			44	0	0	0	0	0.341	0.341	-1.045		1.045			44	0	0	0	0	0.435	0.435	-0.796		0.796			44	0	0	0	0	14.454	14.454	-1.653		1.653			44
	45	0	0	0	0	12.714	12.714	-2.086		2.086			45	0	0	0	0	1.386	1.386	0		0			45	0	0	0	0	1.231	1.231	-4.352		4.352			45	0	0	0	0	16.107	16.107	-0.589		0.589			45
	46	0	0	0	0	14.8	14.8	-1.347		1.347			46	0	0	0	0	1.386	1.386	0		0			46	0	0	0	0	5.583	5.583	-1.679		1.679			46	0	0	0	0	16.696	16.696	30.197					46
	47	0	0	0	0	16.147	16.147	-2.184		2.184			47	0	0	0	0	1.386	1.386	-3.571		3.571			47	0	0	0	0	7.262	7.262	-1.534		1.534			47	0	0	0	0	13.501	-13.501	0		0			47
	48	0	0	0	0	18.331	18.331	-1.816		1.816			48	0	0	0	0	4.957	4.957	-1.033		1.033			48	0	0	0	0	8.796	8.796	-1.773		1.773			48	0	0	0	0	13.501	-13.501	-1.455		1.455			48
	49	0	0	0	0	20.147	20.147	-1.973		1.973			49	0	0	0	0	5.99	5.99	0		0			49	0	0	0	0	10.569	10.569	-2.066		2.066			49	0	0	0	0	12.046	-12.046	-2.264		2.264			49
	50	0	0	0	0	22.12	22.12	-1.341		1.341			50	0	0	0	0	5.99	5.99	0		0			50	0	0	0	0	12.635	12.635	-1.959		1.959			50	0	0	0	0	9.782	-9.782	-1.748		1.748			50
	51	0	0	0	0	23.461	23.461	-2.292		2.292			51	0	0	0	0	5.99	5.99	0		0			51	0	0	0	0	14.594	14.594	0		0			51	0	0	0	0	8.034	-8.034	-2.1		2.1			51
	52	0	0	0	0	25.753	25.753	-1.055		1.055			52	0	0	0	0	5.99	5.99	-0.663		0.663			52	0	0	0	0	14.594	14.594	-1.272		1.272			52	0	0	0	0	5.934	-5.934	-1.616		1.616			52
	53	0	0	0	0	26.808	26.808	-1.738		1.738			53	0	0	0	0	6.653	6.653	0		0			53	0	0	0	0	15.866	15.866	-1.909		1.909			53	0	0	0	0	4.318	-4.318	-0.94		0.94			53
	54	0	0	0	0	28.546	28.546	0		0			54	0	0	0	0	6.653	6.653	0		0			54	0	0	0	0	17.775	17.775	0		0			54	0	0	0	0	3.378	-3.378	-3.516		3.516			54
	55	0	0	0	0	28.546	28.546	-2.28		2.28			55	0	0	0	0	6.653	6.653	0		0			55	0	0	0	0	17.775	17.775	-1.268		1.268			55	0	0	0	0	0.138	0.138	-0.884		0.884			55
	56	0	0	0	0	30.826	30.826	-1.154		1.154			56	0	0	0	0	6.653	6.653	0		0			56	0	0	0	0	19.043	19.043	0		0			56	0	0	0	0	1.022	1.022	-2.106		2.106			56
	57	0	0	0	0	31.98	31.98	0		0			57	0	0	0	0	6.653	6.653	-2.037		2.037			57	0	0	0	0	19.043	19.043	-1.17		1.17			57	0	0	0	0	3.128	3.128	-2.144		2.144			57
	58	0	0	0	0	31.98	31.98	0		0			58	0	0	0	0	8.69	8.69	-1.552		1.552			58	0	0	0	0	20.213	20.213	0		0			58	0	0	0	0	5.272	5.272	-2.107		2.107			58
	59	0	0	0	0	31.98	31.98	34.146					59	0	0	0	0	10.242	10.242	-1.521		1.521			59	0	0	0	0	20.213	20.213	-1.996		1.996			59	0	0	0	0	7.379	7.379	-1.572		1.572			59
	60	0	0	0	0	2.166	-2.166	-4.332		4.332			60	0	0	0	0	11.763	11.763	-1.254		1.254			60	0	0	0	0	22.209	22.209	0		0			60	0	0	0	0	8.951	8.951	-1.118		1.118			60
	61	0	0	0	0	2.166	2.166	-2.197		2.197			61	0	0	0	0	13.017	13.017	0		0			61	0	0	0	0	22.209	22.209	-2.226		2.226			61	0	0	0	0	10.069	10.069	-0.455		0.455			61
	62	0	0	0	0	4.363	4.363	-1.292		1.292			62	0	0	0	0	13.017	13.017	0		0			62	0	0	0	0	24.435	24.435	0		0			62	0	0	0	0	10.524	10.524	-0.692		0.692			62
	63	0	0	0	0	5.655	5.655	-3.158		3.158			63	0	0	0	0	13.017	13.017	0		0			63	0	0	0	0	24.435	24.435	0		0			63	0	0	0	0	11.216	11.216	-0.534		0.534			63
	64	0	0	0	0	8.813	8.813	-2.534		2.534			64	0	0	0	0	13.017	13.017	-1.467		1.467			64	0	0	0	0	24.435	24.435	0		0			64	0	0	0	0	11.75	11.75	-2.1		2.1			64
	65	0	0	0	0	11.347	11.347	-2.305		2.305			65	0	0	0	0	14.484	14.484	0		0			65	0	0	0	0	24.435	24.435	-0.771		0.771			65	0	0	0	0	13.85	13.85	-0.889		0.889			65
	66	0	0	0	0	13.652	13.652	-2.344		2.344			66	0	0	0	0	14.484	14.484	-1.233		1.233			66	0	0	0	0	25.206	25.206	0		0			66	0	0	0	0	14.739	14.739	29.177					66
	67	0	0	0	0	15.996	15.996	-1.125		1.125			67	0	0	0	0	15.717	15.717	0		0			67	0	0	0	0	25.206	25.206	0		0			67	0	0	0	0	14.438	-14.438	-2.095		2.095			67
	68	0	0	0	0	17.121	17.121	-1.818		1.818			68	0	0	0	0	15.717	15.717	-2.383		2.383			68	0	0	0	0	25.206	25.206	18.808					68	0	0	0	0	12.343	-12.343	-0.447		0.447			68
	69	0	0	0	0	18.939	18.939	-1.731		1.731			69	0	0	0	0	18.1	18.1	0		0			69	0	0	0	0	6.398	6.398	0		0			69	0	0	0	0	11.896	-11.896	-2.281		2.281			69
	70	0	0	0	0	20.67	20.67	-1.95		1.95			70	0	0	0	0	18.1	18.1	-1.447		1.447			70	0	0	0	0	6.398	6.398	0		0			70	0	0	0	0	9.615	-9.615	-2.819		2.819			70
	71	0	0	0	0	22.62	22.62	0		0			71	0	0	0	0	19.547	19.547	0		0			71	0	0	0	0	6.398	6.398	-3.276		3.276			71	0	0	0	0	6.796	-6.796	-1.425		1.425			71
	72	0	0	0	0	22.62	22.62	0		0			72	0	0	0	0	19.547	19.547	0		0			72	0	0	0	0	9.674	9.674	-2.408		2.408			72	0	0	0	0	5.371	-5.371	-1.956		1.956			72
	73	0	0	0	0	22.62	22.62	-2.662		2.662			73	0	0	0	0	19.547	19.547	0		0			73	0	0	0	0	12.082	12.082	-2.115		2.115			73	0	0	0	0	3.415	-3.415	-1.575		1.575			73
	74	0	0	0	0	25.282	25.282	0		0			74	0	0	0	0	19.547	19.547	0		0			74	0	0	0	0	14.197	14.197	0		0			74	0	0	0	0	1.84	-1.84	-2.419		2.419			74
	75	0	0	0	0	25.282	25.282	-3.255		3.255			75	0	0	0	0	19.547	19.547	-2.449		2.449			75	0	0	0	0	14.197	14.197	-2.769		2.769			75	0	0	0	0	0.579	0.579	-0.119		0.119			75
	76	0	0	0	0	28.537	28.537	-0.499		0.499			76	0	0	0	0	21.996	21.996	25.948					76	0	0	0	0	16.966	16.966	-1.155		1.155			76	0	0	0	0	0.698	0.698	-1.562		1.562			76
	77	0	0	0	0	29.036	29.036	-2.788		2.788			77	0	0	0	0	3.952	-3.952	-1.87		1.87			77	0	0	0	0	18.121	18.121	0		0			77	0	0	0	0	2.26	2.26	-2.135		2.135			77
	78	0	0	0	0	31.824	31.824	0		0			78	0	0	0	0	2.082	-2.082	-2.263		2.263			78	0	0	0	0	18.121	18.121	-2.127		2.127			78	0	0	0	0	4.395	4.395	-2.06		2.06			78
	79	0	0	0	0	31.824	31.824	22.918					79	0	0	0	0	0.181	0.181	-0.493		0.493			79	0	0	0	0	20.248	20.248	0		0			79	0	0	0	0	6.455	6.455	-1.236		1.236			79
	80	0	0	0	0	8.906	8.906	-3.209		3.209			80	0	0	0	0	0.674	0.674	-1.626		1.626			80	0	0	0	0	20.248	20.248	-1.049		1.049			80	0	0	0	0	7.691	7.691	-1.051		1.051			80
	81	0	0	0	0	12.115	12.115	-1.836		1.836			81	0	0	0	0	2.3	2.3	-2.067		2.067			81	0	0	0	0	21.297	21.297	0		0			81	0	0	0	0	8.742	8.742	-1.332		1.332			81
	82	0	0	0	0	13.951	13.951	-2.419		2.419			82	0	0	0	0	4.367	4.367	-1.573		1.573			82	0	0	0	0	21.297	21.297	-1.546		1.546			82	0	0	0	0	10.074	10.074	-1.656		1.656			82
	83	0	0	0	0	16.37	16.37	-1.967		1.967			83	0	0	0	0	5.94	5.94	-1.591		1.591			83	0	0	0	0	22.843	22.843	0		0			83	0	0	0	0	11.73	11.73	0		0			83
	84	0	0	0	0	18.337	18.337	-2.008		2.008			84	0	0	0	0	7.531	7.531	-1.003		1.003			84	0	0	0	0	22.843	22.843	0		0			84	0	0	0	0	11.73	11.73	20.476					84
	85	0	0	0	0	20.345	20.345	-1.332		1.332			85	0	0	0	0	8.534	8.534	-1.553		1.553			85	0	0	0	0	22.843	22.843	-1.369		1.369			85	0	0	0	0	8.746	-8.746	-2.051		2.051			85
	86	0	0	0	0	21.677	21.677	-0.708		0.708			86	0	0	0	0	10.087	10.087	-0.703		0.703			86	0	0	0	0	24.212	24.212	0		0			86	0	0	0	0	6.695	-6.695	-1.222		1.222			86
	87	0	0	0	0	22.385	22.385	-1.212		1.212			87	0	0	0	0	10.79	10.79	-1.571		1.571			87	0	0	0	0	24.212	24.212	0		0			87	0	0	0	0	5.473	-5.473	-1.557		1.557			87
	88	0	0	0	0	23.597	23.597	-1.351		1.351			88	0	0	0	0	12.361	12.361	-0.761		0.761			88	0	0	0	0	24.212	24.212	0		0			88	0	0	0	0	3.916	-3.916	-1.784		1.784			88
	89	0	0	0	0	24.948	24.948	-2.103		2.103			89	0	0	0	0	13.122	13.122	-1.896		1.896			89	0	0	0	0	24.212	24.212	-2.013		2.013			89	0	0	0	0	2.132	-2.132	-2.281		2.281			89
	90	0	0	0	0	27.051	27.051	0		0			90	0	0	0	0	15.018	15.018	-1.24		1.24			90	0	0	0	0	26.225	26.225	0		0			90	0	0	0	0	0.149	0.149	-1.615		1.615			90
	91	0	0	0	0	27.051	27.051	-1.611		1.611			91	0	0	0	0	16.258	16.258	-1.378		1.378			91	0	0	0	0	26.225	26.225	0		0			91	0	0	0	0	1.764	1.764	-1.862		1.862			91
	92	0	0	0	0	28.662	28.662	-1.791		1.791			92	0	0	0	0	17.636	17.636	0		0			92	0	0	0	0	26.225	26.225	0		0			92	0	0	0	0	3.626	3.626	-1.58		1.58			92
	93	0	0	0	0	30.453	30.453	-1.595		1.595			93	0	0	0	0	17.636	17.636	-1.482		1.482			93	0	0	0	0	26.225	26.225	0		0			93	0	0	0	0	5.206	5.206	-1.154		1.154			93
	94	0	0	0	0	32.048	32.048	0		0			94	0	0	0	0	19.118	19.118	0		0			94	0	0	0	0	26.225	26.225	0		0			94	0	0	0	0	6.36	6.36	-0.96		0.96			94
	95	0	0	0	0	32.048	32.048	0		0			95	0	0	0	0	19.118	19.118	0		0			95	0	0	0	0	26.225	26.225	0		0			95	0	0	0	0	7.32	7.32	0		0			95
	96	0	0	0	0	32.048	32.048	0		0			96	0	0	0	0	19.118	19.118	0		0			96	0	0	0	0	26.225	26.225	-0.42		0.42			96	0	0	0	0	7.32	7.32	-0.853		0.853			96
	97	0	0	0	0	32.048	32.048	37.589					97	0	0	0	0	19.118	19.118	-1.974		1.974			97	0	0	0	0	26.645	26.645	0		0			97	0	0	0	0	8.173	8.173	-1.474		1.474			97
	98	0	0	0	0	5.541	-5.541	0		0			98	0	0	0	0	21.092	21.092	0		0			98	0	0	0	0	26.645	26.645	0		0			98	0	0	0	0	9.647	9.647	-1.894		1.894			98
	99	0	0	0	0	5.541	-5.541	-2.48		2.48			99	0	0	0	0	21.092	21.092	-1.519		1.519			99	0	0	0	0	26.645	26.645	0		0			99	0	0	0	0	11.541	11.541	0		0			99
	100	0	0	0	0	3.061	-3.061	-3.465		3.465			100	0	0	0	0	22.611	22.611	0		0			100	0	0	0	0	26.645	26.645	0		0			100	0	0	0	0	11.541	11.541	23.669					100
	101	0	0	0	0	0.404	0.404	-1.973		1.973			101	0	0	0	0	22.611	22.611	-1.511		1.511			101	0	0	0	0	26.645	26.645	0		0			101	0	0	0	0	12.128	-12.128	-1.69		1.69			101
	102	0	0	0	0	2.377	2.377	-1.956		1.956			102	0	0	0	0	24.122	24.122	0		0			102	0	0	0	0	26.645	26.645	0		0			102	0	0	0	0	10.438	-10.438	-1.396		1.396			102
	103	0	0	0	0	4.333	4.333	-1.74		1.74			103	0	0	0	0	24.122	24.122	27.382					103	0	0	0	0	26.645	26.645	0		0			103	0	0	0	0	9.042	-9.042	-1.496		1.496			103
	104	0	0	0	0	6.073	6.073	-1.175		1.175			104	0	0	0	0	3.26	-3.26	-3.263		3.263			104	0	0	0	0	26.645	26.645	0		0			104	0	0	0	0	7.546	-7.546	-1.439		1.439			104
	105	0	0	0	0	7.248	7.248	-1.013		1.013			105	0	0	0	0	0.003	0.003	-3.272		3.272			105	0	0	0	0	26.645	26.645	0		0			105	0	0	0	0	6.107	-6.107	-1.664		1.664			105
	106	0	0	0	0	8.261	8.261	-1.935		1.935			106	0	0	0	0	3.275	3.275	-1.652		1.652			106	0	0	0	0	26.645	26.645	0		0			106	0	0	0	0	4.443	-4.443	-0.509		0.509			106
	107	0	0	0	0	10.196	10.196	-1.448		1.448			107	0	0	0	0	4.927	4.927	-1.015		1.015			107	0	0	0	0	26.645	26.645	0		0			107	0	0	0	0	3.934	-3.934	-2.045		2.045			107
	108	0	0	0	0	11.644	11.644	-1.195		1.195			108	0	0	0	0	5.942	5.942	-2.544		2.544			108	0	0	0	0	26.645	26.645	0		0			108	0	0	0	0	1.889	-1.889	-2.181		2.181			108
	109	0	0	0	0	12.839	12.839	-1.909		1.909			109	0	0	0	0	8.486	8.486	-0.674		0.674			109	0	0	0	0	26.645	26.645	0		0			109	0	0	0	0	0.292	0.292	-0.011		0.011			109
	110	0	0	0	0	14.748	14.748	-1.718		1.718			110	0	0	0	0	9.16	9.16	-0.82		0.82			110	0	0	0	0	26.645	26.645	0		0			110	0	0	0	0	0.303	0.303	-2.704		2.704			110
	111	0	0	0	0	16.466	16.466	-1.298		1.298			111	0	0	0	0	9.98	9.98	0		0			111	0	0	0	0	26.645	26.645	0		0			111	0	0	0	0	3.007	3.007	0		0			111
	112	0	0	0	0	17.764	17.764	0		0			112	0	0	0	0	9.98	9.98	-1.945		1.945			112	0	0	0	0	26.645	26.645	0		0			112	0	0	0	0	3.007	3.007	-2.429		2.429			112
	113	0	0	0	0	17.764	17.764	-1.897		1.897			113	0	0	0	0	11.925	11.925	-1.036		1.036			113	0	0	0	0	26.645	26.645	0		0			113	0	0	0	0	5.436	5.436	-1.435		1.435			113
	114	0	0	0	0	19.661	19.661	-2.159		2.159			114	0	0	0	0	12.961	12.961	0		0			114	0	0	0	0	26.645	26.645	0		0			114	0	0	0	0	6.871	6.871	-1.957		1.957			114
	115	0	0	0	0	21.82	21.82	-2.211		2.211			115	0	0	0	0	12.961	12.961	-2.123		2.123			115	0	0	0	0	26.645	26.645	0		0			115	0	0	0	0	8.828	8.828	0		0			115
	116	0	0	0	0	24.031	24.031	-1.277		1.277			116	0	0	0	0	15.084	15.084	0		0			116	0	0	0	0	26.645	26.645	0		0			116	0	0	0	0	8.828	8.828	0		0			116
	117	0	0	0	0	25.308	25.308	-0.938		0.938			117	0	0	0	0	15.084	15.084	-1.603		1.603			117	0	0	0	0	26.645	26.645	0		0			117	0	0	0	0	8.828	8.828	18.678					117
	118	0	0	0	0	26.246	26.246	-1.755		1.755			118	0	0	0	0	16.687	16.687	0		0			118	0	0	0	0	26.645	26.645	0		0			118	0	0	0	0	9.85	-9.85	-1.625		1.625			118
	119	0	0	0	0	28.001	28.001	-1.496		1.496			119	0	0	0	0	16.687	16.687	0		0			119	0	0	0	0	26.645	26.645	0		0			119	0	0	0	0	8.225	-8.225	-2.015		2.015			119
	120	0	0	0	0	29.497	29.497	-1.116		1.116			120	0	0	0	0	16.687	16.687	-1.87		1.87			120	0	0	0	0	26.645	26.645	0		0			120	0	0	0	0	6.21	-6.21	-1.611		1.611			120
	121	0	0	0	0	30.613	30.613	0		0			121	0	0	0	0	18.557	18.557	0		0			121	0	0	0	0	26.645	26.645	26.514					121	0	0	0	0	4.599	-4.599	-1.511		1.511			121
	122	0	0	0	0	30.613	30.613	-0.902		0.902			122	0	0	0	0	18.557	18.557	-1.939		1.939			122	0	0	0	0	0.131	0.131	-1.182		1.182			122	0	0	0	0	3.088	-3.088	-3.24		3.24			122
	123	0	0	0	0	31.515	31.515	-0.984		0.984			123	0	0	0	0	20.496	20.496	0		0			123	0	0	0	0	1.313	1.313	-3.594		3.594			123	0	0	0	0	0.152	0.152	0		0			123
	124	0	0	0	0	32.499	32.499	0		0			124	0	0	0	0	20.496	20.496	0		0			124	0	0	0	0	4.907	4.907	-2.007		2.007			124	0	0	0	0	0.152	0.152	-1.481		1.481			124
	125	0	0	0	0	32.499	32.499	-1.523		1.523			125	0	0	0	0	20.496	20.496	20.274					125	0	0	0	0	6.914	6.914	-2.213		2.213			125	0	0	0	0	1.633	1.633	-1.338		1.338			125
	126	0	0	0	0	34.022	34.022	0		0			126	0	0	0	0	0.222	0.222	-3.191		3.191			126	0	0	0	0	9.127	9.127	-0.858		0.858			126	0	0	0	0	2.971	2.971	-0.676		0.676			126
	127	0	0	0	0	34.022	34.022	36.724					127	0	0	0	0	3.413	3.413	-1.872		1.872			127	0	0	0	0	9.985	9.985	-1.326		1.326			127	0	0	0	0	3.647	3.647	-1.946		1.946			127
	128	0	0	0	0	2.702	-2.702	0		0			128	0	0	0	0	5.285	5.285	-0.842		0.842			128	0	0	0	0	11.311	11.311	-1.836		1.836			128	0	0	0	0	5.593	5.593	-1.349		1.349			128
	129	0	0	0	0	2.702	-2.702	-2.78		2.78			129	0	0	0	0	6.127	6.127	-0.732		0.732			129	0	0	0	0	13.147	13.147	0		0			129	0	0	0	0	6.942	6.942	-2.371		2.371			129
	130	0	0	0	0	0.078	0.078	-4.482		4.482			130	0	0	0	0	6.859	6.859	-0.825		0.825			130	0	0	0	0	13.147	13.147	-1.245		1.245			130	0	0	0	0	9.313	9.313	-0.93		0.93			130
	131	0	0	0	0	4.56	4.56	0		0			131	0	0	0	0	7.684	7.684	-2.461		2.461			131	0	0	0	0	14.392	14.392	-1.256		1.256			131	0	0	0	0	10.243	10.243	0		0			131
	132	0	0	0	0	4.56	4.56	-1.999		1.999			132	0	0	0	0	10.145	10.145	-1.113		1.113			132	0	0	0	0	15.648	15.648	-1.51		1.51			132	0	0	0	0	10.243	10.243	22.992					132
	133	0	0	0	0	6.559	6.559	-1.294		1.294			133	0	0	0	0	11.258	11.258	0		0			133	0	0	0	0	17.158	17.158	0		0			133	0	0	0	0	12.749	-12.749	-20.697		20.697			133
	134	0	0	0	0	7.853	7.853	-1.894		1.894			134	0	0	0	0	11.258	11.258	-1.911		1.911			134	0	0	0	0	17.158	17.158	-1.475		1.475			134	0	0	0	0	7.948	7.948	0		0			134
	135	0	0	0	0	9.747	9.747	-1.598		1.598			135	0	0	0	0	13.169	13.169	-0.599		0.599			135	0	0	0	0	18.633	18.633	0		0			135	0	0	0	0	7.948	7.948	0		0			135
	136	0	0	0	0	11.345	11.345	-2.01		2.01			136	0	0	0	0	13.768	13.768	0		0			136	0	0	0	0	18.633	18.633	-1.697		1.697			136	0	0	0	0	7.948	7.948	0		0			136
	137	0	0	0	0	13.355	13.355	-1.145		1.145			137	0	0	0	0	13.768	13.768	-0.813		0.813			137	0	0	0	0	20.33	20.33	0		0			137	0	0	0	0	7.948	7.948	-1.816		1.816			137
	138	0	0	0	0	14.5	14.5	-1.839		1.839			138	0	0	0	0	14.581	14.581	0		0			138	0	0	0	0	20.33	20.33	-1.514		1.514			138	0	0	0	0	9.764	9.764	-2.711		2.711			138
	139	0	0	0	0	16.339	16.339	-1.811		1.811			139	0	0	0	0	14.581	14.581	-1.979		1.979			139	0	0	0	0	21.844	21.844	0		0			139	0	0	0	0	12.475	12.475	-0.857		0.857			139
	140	0	0	0	0	18.15	18.15	0		0			140	0	0	0	0	16.56	16.56	0		0			140	0	0	0	0	21.844	21.844	0		0			140	0	0	0	0	13.332	13.332	-1.121		1.121			140
	141	0	0	0	0	18.15	18.15	-2.62		2.62			141	0	0	0	0	16.56	16.56	-1.95		1.95			141	0	0	0	0	21.844	21.844	-1.857		1.857			141	0	0	0	0	14.453	14.453	-0.637		0.637			141
	142	0	0	0	0	20.77	20.77	-1.166		1.166			142	0	0	0	0	18.51	18.51	0		0			142	0	0	0	0	23.701	23.701	0		0			142	0	0	0	0	15.09	15.09	0		0			142
	143	0	0	0	0	21.936	21.936	-2.333		2.333			143	0	0	0	0	18.51	18.51	0		0			143	0	0	0	0	23.701	23.701	0		0			143	0	0	0	0	15.09	15.09	-1.207		1.207			143
	144	0	0	0	0	24.269	24.269	-1.769		1.769			144	0	0	0	0	18.51	18.51	0		0			144	0	0	0	0	23.701	23.701	0		0			144	0	0	0	0	16.297	16.297	0		0			144
	145	0	0	0	0	26.038	26.038	-1.542		1.542			145	0	0	0	0	18.51	18.51	18.461					145	0	0	0	0	23.701	23.701	0		0			145	0	0	0	0	16.297	16.297	-0.639		0.639			145
	146	0	0	0	0	27.58	27.58	0		0			146	0	0	0	0	0.049	0.049	-2.643		2.643			146	0	0	0	0	23.701	23.701	0		0			146	0	0	0	0	16.936	16.936	0		0			146
	147	0	0	0	0	27.58	27.58	-2.013		2.013			147	0	0	0	0	2.692	2.692	-1.796		1.796			147	0	0	0	0	23.701	23.701	0		0			147	0	0	0	0	16.936	16.936	-2.28		2.28			147
	148	0	0	0	0	29.593	29.593	0		0			148	0	0	0	0	4.488	4.488	-1.95		1.95			148	0	0	0	0	23.701	23.701	0		0			148	0	0	0	0	19.216	19.216	0		0			148
	149	0	0	0	0	29.593	29.593	-2.496		2.496			149	0	0	0	0	6.438	6.438	-0.849		0.849			149	0	0	0	0	23.701	23.701	0		0			149	0	0	0	0	19.216	19.216	-0.615		0.615			149
	150	0	0	0	0	32.089	32.089	0		0			150	0	0	0	0	7.287	7.287	-1.698		1.698			150	0	0	0	0	23.701	23.701	0		0			150	0	0	0	0	19.831	19.831	0		0			150
	151	0	0	0	0	32.089	32.089	-1.268		1.268			151	0	0	0	0	8.985	8.985	-0.634		0.634			151	0	0	0	0	23.701	23.701	-1.908		1.908			151	0	0	0	0	19.831	19.831	-1.897		1.897			151
	152	0	0	0	0	33.357	33.357	0		0			152	0	0	0	0	9.619	9.619	-1.905		1.905			152	0	0	0	0	25.609	25.609	0		0			152	0	0	0	0	21.728	21.728	0		0			152
	153	0	0	0	0	33.357	33.357	-1.098		1.098			153	0	0	0	0	11.524	11.524	0		0			153	0	0	0	0	25.609	25.609	0		0			153	0	0	0	0	21.728	21.728	0		0			153
	154	0	0	0	0	34.455	34.455	29.015					154	0	0	0	0	11.524	11.524	0		0			154	0	0	0	0	25.609	25.609	0		0			154	0	0	0	0	21.728	21.728	-0.859		0.859			154
	155	0	0	0	0	5.44	5.44	-2.208		2.208			155	0	0	0	0	11.524	11.524	6.068					155	0	0	0	0	25.609	25.609	0		0			155	0	0	0	0	22.587	22.587	33.68		-33.68			155
	156	0	0	0	0	7.648	7.648	-3.296		3.296			156	0	0	0	0	5.456	5.456	-3.03		3.03			156	0	0	0	0	25.609	25.609	0		0			156	0	0	0	0	11.093	-11.093	0		0			156
	157	0	0	0	0	10.944	10.944	-1.518		1.518			157	0	0	0	0	8.486	8.486	-2.098		2.098			157	0	0	0	0	25.609	25.609	0		0			157	0	0	0	0	11.093	-11.093	-3.024		3.024			157
	158	0	0	0	0	12.462	12.462	-1.692		1.692			158	0	0	0	0	10.584	10.584	0		0			158	0	0	0	0	25.609	25.609	0		0			158	0	0	0	0	8.069	-8.069	-3.48		3.48			158
	159	0	0	0	0	14.154	14.154	-1.413		1.413			159	0	0	0	0	10.584	10.584	-0.651		0.651			159	0	0	0	0	25.609	25.609	0		0			159	0	0	0	0	4.589	-4.589	-0.253		0.253			159
	160	0	0	0	0	15.567	15.567	-2.068		2.068			160	0	0	0	0	11.235	11.235	0		0			160	0	0	0	0	25.609	25.609	0		0			160	0	0	0	0	4.336	-4.336	-1.703		1.703			160
	161	0	0	0	0	17.635	17.635	-1.695		1.695			161	0	0	0	0	11.235	11.235	-1.57		1.57			161	0	0	0	0	25.609	25.609	0		0			161	0	0	0	0	2.633	-2.633	-1.007		1.007			161
	162	0	0	0	0	19.33	19.33	-1.322		1.322			162	0	0	0	0	12.805	12.805	0		0			162	0	0	0	0	25.609	25.609	20.864					162	0	0	0	0	1.626	-1.626	-2.681		2.681			162
	163	0	0	0	0	20.652	20.652	-1.168		1.168			163	0	0	0	0	12.805	12.805	-2.014		2.014			163	0	0	0	0	4.745	4.745	-2.749		2.749			163	0	0	0	0	1.055	1.055	-1.708		1.708			163
	164	0	0	0	0	21.82	21.82	-1.925		1.925			164	0	0	0	0	14.819	14.819	-0.812		0.812			164	0	0	0	0	7.494	7.494	-1.961		1.961			164	0	0	0	0	2.763	2.763	-1.572		1.572			164
	165	0	0	0	0	23.745	23.745	-1.935		1.935			165	0	0	0	0	15.631	15.631	0		0			165	0	0	0	0	9.455	9.455	-2.284		2.284			165	0	0	0	0	4.335	4.335	-1.234		1.234			165
	166	0	0	0	0	25.68	25.68	-1.168		1.168			166	0	0	0	0	15.631	15.631	-1.407		1.407			166	0	0	0	0	11.739	11.739	-1.011		1.011			166	0	0	0	0	5.569	5.569	-1.716		1.716			166
	167	0	0	0	0	26.848	26.848	-2.149		2.149			167	0	0	0	0	17.038	17.038	0		0			167	0	0	0	0	12.75	12.75	-1.694		1.694			167	0	0	0	0	7.285	7.285	-1.51		1.51			167
	168	0	0	0	0	28.997	28.997	-0.894		0.894			168	0	0	0	0	17.038	17.038	0		0			168	0	0	0	0	14.444	14.444	-1.181		1.181			168	0	0	0	0	8.795	8.795	-0.902		0.902			168
	169	0	0	0	0	29.891	29.891	-0.615		0.615			169	0	0	0	0	17.038	17.038	0		0			169	0	0	0	0	15.625	15.625	0		0			169	0	0	0	0	9.697	9.697	-1.352		1.352			169
	170	0	0	0	0	30.506	30.506	0		0			170	0	0	0	0	17.038	17.038	16.658					170	0	0	0	0	15.625	15.625	-1.219		1.219			170	0	0	0	0	11.049	11.049	-1.927		1.927			170
	171	0	0	0	0	30.506	30.506	-1.013		1.013			171	0	0	0	0	0.38	0.38	-1.225		1.225			171	0	0	0	0	16.844	16.844	0		0			171	0	0	0	0	12.976	12.976	-1.615		1.615			171
	172	0	0	0	0	31.519	31.519	0		0			172	0	0	0	0	1.605	1.605	0		0			172	0	0	0	0	16.844	16.844	-1.033		1.033			172	0	0	0	0	14.591	14.591	-0.949		0.949			172
	173	0	0	0	0	31.519	31.519	-1.992		1.992			173	0	0	0	0	1.605	1.605	-1.534		1.534			173	0	0	0	0	17.877	17.877	0		0			173	0	0	0	0	15.54	15.54	-1.392		1.392			173
	174	0	0	0	0	33.511	33.511	0		0			174	0	0	0	0	3.139	3.139	-2.282		2.282			174	0	0	0	0	17.877	17.877	0		0			174	0	0	0	0	16.932	16.932	-0.952		0.952			174
	175	0	0	0	0	33.511	33.511						175	0	0	0	0	5.421	5.421	0		0			175	0	0	0	0	17.877	17.877	-1.825		1.825			175	0	0	0	0	17.884	17.884	0		0			175
													176	0	0	0	0	5.421	5.421	-0.652		0.652			176	0	0	0	0	19.702	19.702	0		0			176	0	0	0	0	17.884	17.884	-2.133		2.133			176
													177	0	0	0	0	6.073	6.073	-1.947		1.947			177	0	0	0	0	19.702	19.702	0		0			177	0	0	0	0	20.017	20.017	0		0			177
													178	0	0	0	0	8.02	8.02	-0.893		0.893			178	0	0	0	0	19.702	19.702	-2.04		2.04			178	0	0	0	0	20.017	20.017	0		0			178
													179	0	0	0	0	8.913	8.913	-1.491		1.491			179	0	0	0	0	21.742	21.742	0		0			179	0	0	0	0	20.017	20.017	0		0			179
													180	0	0	0	0	10.404	10.404	-1.532		1.532			180	0	0	0	0	21.742	21.742	0		0			180	0	0	0	0	20.017	20.017	30.036					180
													181	0	0	0	0	11.936	11.936	-1.126		1.126			181	0	0	0	0	21.742	21.742	-0.505		0.505			181	0	0	0	0	10.019	-10.019	0		0			181
													182	0	0	0	0	13.062	13.062	-0.817		0.817			182	0	0	0	0	22.247	22.247	0		0			182	0	0	0	0	10.019	-10.019	-1.622		1.622			182
													183	0	0	0	0	13.879	13.879						183	0	0	0	0	22.247	22.247						183	0	0	0	0	8.397	-8.397						183
[truncated: 130 more columns]

## Sheet: Hoja3
Trial#2 - 2dpt
(PC-ablated)
4 frames per second
	Tamox 2dpt	ser30						degrees rot	# saccades	speed rotat	speed average		Tamox 2dpt	ser28						degrees rot	# saccades	speed rotat	speed average		Tamox 2dpt	ser26					degrees rot	# saccades	speed rotat	speed average		Tamox 2dpt	ser24						degrees rot	# saccades	speed rotat	speed average		Tamox 2dpt	ser22
	1	0	0	0	0	28.618	28.618	-0.983	6	0.983	1.20778		1	0	0	0	0	4.389	4.389	1.681	1		0.352205		1	0	0	0	0	28.398	0	0	0	0.152897		1	0	0	0	0	33.171	33.171	-2.016	4	2.016	0.984341		1	0
	2	0	0	0	0	29.601	29.601	-2.83		2.83			2	0	0	0	0	2.708	2.708	2.497					2	0	0	0	0	28.398	-0.705		0.705			2	0	0	0	0	35.187	35.187	0		0			2	0
	3	0	0	0	0	32.431	32.431	0.383					3	0	0	0	0	0.211	0.211	-0.472		0.472			3	0	0	0	0	29.103	0		0			3	0	0	0	0	35.187	35.187	-1.092		1.092			3	0
	4	0	0	0	0	32.048	32.048	-1.912		1.912			4	0	0	0	0	0.683	0.683	-3.29		3.29			4	0	0	0	0	29.103	0		0			4	0	0	0	0	36.279	36.279	0		0			4	0
	5	0	0	0	0	33.96	33.96	-2.145		2.145			5	0	0	0	0	3.973	3.973	-1.349		1.349			5	0	0	0	0	29.103	0		0			5	0	0	0	0	36.279	36.279	36.135					5	0
	6	0	0	0	0	36.105	36.105	-2.428		2.428			6	0	0	0	0	5.322	5.322	-1.634		1.634			6	0	0	0	0	29.103	-1.613		1.613			6	0	0	0	0	0.144	0.144	9.54					6	0
	7	0	0	0	0	38.533	38.533	-1.054		1.054			7	0	0	0	0	6.956	6.956	-1.11		1.11			7	0	0	0	0	30.716	0		0			7	0	0	0	0	9.396	-9.396	3.693					7	0
	8	0	0	0	0	39.587	39.587	0		0			8	0	0	0	0	8.066	8.066	-0.4		0.4			8	0	0	0	0	30.716	0		0			8	0	0	0	0	13.089	-13.089	-4.616		4.616			8	0
	9	0	0	0	0	39.587	39.587	32.409					9	0	0	0	0	8.466	8.466	-0.883		0.883			9	0	0	0	0	30.716	0		0			9	0	0	0	0	8.473	-8.473	-2.016		2.016			9	0
	10	0	0	0	0	7.178	7.178	-10.151		10.151			10	0	0	0	0	9.349	9.349	0		0			10	0	0	0	0	30.716	5.441					10	0	0	0	0	6.457	-6.457	-2.88		2.88			10	0
	11	0	0	0	0	17.329	17.329	-1.582		1.582			11	0	0	0	0	9.349	9.349	-1.081		1.081			11	0	0	0	0	25.275	-2.243		2.243			11	0	0	0	0	3.577	-3.577	-4.612		4.612			11	0
	12	0	0	0	0	18.911	18.911	-0.537		0.537			12	0	0	0	0	10.43	10.43	-1.801		1.801			12	0	0	0	0	27.518	0		0			12	0	0	0	0	1.035	1.035	-3.738		3.738			12	0
	13	0	0	0	0	19.448	19.448	-2.039		2.039			13	0	0	0	0	12.231	12.231	0		0			13	0	0	0	0	27.518	-2.346		2.346			13	0	0	0	0	4.773	4.773	-0.848		0.848			13	0
	14	0	0	0	0	21.487	21.487	-1.547		1.547			14	0	0	0	0	12.231	12.231	-2.111		2.111			14	0	0	0	0	29.864	0		0			14	0	0	0	0	5.621	5.621	-2.337		2.337			14	0
	15	0	0	0	0	23.034	23.034	0		0			15	0	0	0	0	14.342	14.342	0		0			15	0	0	0	0	29.864	0		0			15	0	0	0	0	7.958	7.958	-1.944		1.944			15	0
	16	0	0	0	0	23.034	23.034	-1.354		1.354			16	0	0	0	0	14.342	14.342	-0.967		0.967			16	0	0	0	0	29.864	0		0			16	0	0	0	0	9.902	9.902	-2.923		2.923			16	0
	17	0	0	0	0	24.388	24.388	-1.01		1.01			17	0	0	0	0	15.309	15.309	0		0			17	0	0	0	0	29.864	0		0			17	0	0	0	0	12.825	12.825	-2.281		2.281			17	0
	18	0	0	0	0	25.398	25.398	0		0			18	0	0	0	0	15.309	15.309	-1.911		1.911			18	0	0	0	0	29.864	0		0			18	0	0	0	0	15.106	15.106	-0.799		0.799			18	0
	19	0	0	0	0	25.398	25.398	-2.548		2.548			19	0	0	0	0	17.22	17.22	0		0			19	0	0	0	0	29.864	0		0			19	0	0	0	0	15.905	15.905	-2.191		2.191			19	0
	20	0	0	0	0	27.946	27.946	-0.704		0.704			20	0	0	0	0	17.22	17.22	-1.762		1.762			20	0	0	0	0	29.864	0		0			20	0	0	0	0	18.096	18.096	-1.641		1.641			20	0
	21	0	0	0	0	28.65	28.65	0		0			21	0	0	0	0	18.982	18.982	0		0			21	0	0	0	0	29.864	0		0			21	0	0	0	0	19.737	19.737	-0.947		0.947			21	0
	22	0	0	0	0	28.65	28.65	-1.145		1.145			22	0	0	0	0	18.982	18.982	-0.949		0.949			22	0	0	0	0	29.864	0		0			22	0	0	0	0	20.684	20.684	-1.627		1.627			22	0
	23	0	0	0	0	29.795	29.795	0		0			23	0	0	0	0	19.931	19.931	0		0			23	0	0	0	0	29.864	0		0			23	0	0	0	0	22.311	22.311	-1.45		1.45			23	0
	24	0	0	0	0	29.795	29.795	-1.341		1.341			24	0	0	0	0	19.931	19.931	-0.581		0.581			24	0	0	0	0	29.864	0		0			24	0	0	0	0	23.761	23.761	-1.847		1.847			24	0
	25	0	0	0	0	31.136	31.136	-1.349		1.349			25	0	0	0	0	20.512	20.512	0		0			25	0	0	0	0	29.864	0		0			25	0	0	0	0	25.608	25.608	0		0			25	0
	26	0	0	0	0	32.485	32.485	0		0			26	0	0	0	0	20.512	20.512	-1.306		1.306			26	0	0	0	0	29.864	0		0			26	0	0	0	0	25.608	25.608	-3.287		3.287			26	0
	27	0	0	0	0	32.485	32.485	-0.274		0.274			27	0	0	0	0	21.818	21.818	0		0			27	0	0	0	0	29.864	0		0			27	0	0	0	0	28.895	28.895	0		0			27	0
	28	0	0	0	0	32.759	32.759	-0.843		0.843			28	0	0	0	0	21.818	21.818	-1.802		1.802			28	0	0	0	0	29.864	0		0			28	0	0	0	0	28.895	28.895	-0.981		0.981			28	0
	29	0	0	0	0	33.602	33.602	0		0			29	0	0	0	0	23.62	23.62	0		0			29	0	0	0	0	29.864	0		0			29	0	0	0	0	29.876	29.876	-1.58		1.58			29	0
	30	0	0	0	0	33.602	33.602	-1.256		1.256			30	0	0	0	0	23.62	23.62	-1.401		1.401			30	0	0	0	0	29.864	0		0			30	0	0	0	0	31.456	31.456	0		0			30	0
	31	0	0	0	0	34.858	34.858	-2.837		2.837			31	0	0	0	0	25.021	25.021	0		0			31	0	0	0	0	29.864	0		0			31	0	0	0	0	31.456	31.456	-1.38		1.38			31	0
	32	0	0	0	0	37.695	37.695	0		0			32	0	0	0	0	25.021	25.021	-1.922		1.922			32	0	0	0	0	29.864	0		0			32	0	0	0	0	32.836	32.836	0		0			32	0
	33	0	0	0	0	37.695	37.695	0		0			33	0	0	0	0	26.943	26.943	0		0			33	0	0	0	0	29.864	0		0			33	0	0	0	0	32.836	32.836	-2.155		2.155			33	0
	34	0	0	0	0	37.695	37.695	-2.274		2.274			34	0	0	0	0	26.943	26.943	0		0			34	0	0	0	0	29.864	0		0			34	0	0	0	0	34.991	34.991	0		0			34	0
	35	0	0	0	0	39.969	39.969	0		0			35	0	0	0	0	26.943	26.943	0		0			35	0	0	0	0	29.864	0		0			35	0	0	0	0	34.991	34.991	0		0			35	0
	36	0	0	0	0	39.969	39.969	39.519					36	0	0	0	0	26.943	26.943	0		0			36	0	0	0	0	29.864	0		0			36	0	0	0	0	34.991	34.991	0		0			36	0
	37	0	0	0	0	0.45	0.45	-0.331		0.331			37	0	0	0	0	26.943	26.943	2.295					37	0	0	0	0	29.864	0		0			37	0	0	0	0	34.991	34.991	0		0			37	0
	38	0	0	0	0	0.781	0.781	-3.842		3.842			38	0	0	0	0	24.648	24.648	0		0			38	0	0	0	0	29.864	0		0			38	0	0	0	0	34.991	34.991	-1.752		1.752			38	0
	39	0	0	0	0	4.623	4.623	-3.636		3.636			39	0	0	0	0	24.648	24.648	-1.206		1.206			39	0	0	0	0	29.864	0		0			39	0	0	0	0	36.743	36.743	0		0			39	0
	40	0	0	0	0	8.259	8.259	-3.037		3.037			40	0	0	0	0	25.854	25.854	0		0			40	0	0	0	0	29.864	0		0			40	0	0	0	0	36.743	36.743	42.575					40	0
	41	0	0	0	0	11.296	11.296	-4.099		4.099			41	0	0	0	0	25.854	25.854	-3.544		3.544			41	0	0	0	0	29.864	0		0			41	0	0	0	0	5.832	-5.832	-5.977		5.977			41	0
	42	0	0	0	0	15.395	15.395	-1.82		1.82			42	0	0	0	0	29.398	29.398	-0.436		0.436			42	0	0	0	0	29.864	0		0			42	0	0	0	0	0.145	0.145	-3.58		3.58			42	0
	43	0	0	0	0	17.215	17.215	-1.609		1.609			43	0	0	0	0	29.834	29.834	0		0			43	0	0	0	0	29.864	0		0			43	0	0	0	0	3.725	3.725	-3.615		3.615			43	0
	44	0	0	0	0	18.824	18.824	-1.031		1.031			44	0	0	0	0	29.834	29.834	0		0			44	0	0	0	0	29.864	0		0			44	0	0	0	0	7.34	7.34	-2.022		2.022			44	0
	45	0	0	0	0	19.855	19.855	-1.399		1.399			45	0	0	0	0	29.834	29.834	0		0			45	0	0	0	0	29.864	0		0			45	0	0	0	0	9.362	9.362	-3.079		3.079			45	0
	46	0	0	0	0	21.254	21.254	-1.635		1.635			46	0	0	0	0	29.834	29.834	0		0			46	0	0	0	0	29.864	0		0			46	0	0	0	0	12.441	12.441	-1.45		1.45			46	0
	47	0	0	0	0	22.889	22.889	-2.638		2.638			47	0	0	0	0	29.834	29.834	0		0			47	0	0	0	0	29.864	0		0			47	0	0	0	0	13.891	13.891	-1.18		1.18			47	0
	48	0	0	0	0	25.527	25.527	-1.664		1.664			48	0	0	0	0	29.834	29.834	0		0			48	0	0	0	0	29.864	0		0			48	0	0	0	0	15.071	15.071	-2.002		2.002			48	0
	49	0	0	0	0	27.191	27.191	-2.616		2.616			49	0	0	0	0	29.834	29.834	0		0			49	0	0	0	0	29.864	0		0			49	0	0	0	0	17.073	17.073	-1.217		1.217			49	0
	50	0	0	0	0	29.807	29.807	-1.098		1.098			50	0	0	0	0	29.834	29.834	0		0			50	0	0	0	0	29.864	0		0			50	0	0	0	0	18.29	18.29	-1.938		1.938			50	0
	51	0	0	0	0	30.905	30.905	-2.431		2.431			51	0	0	0	0	29.834	29.834	0		0			51	0	0	0	0	29.864	0		0			51	0	0	0	0	20.228	20.228	-1.478		1.478			51	0
	52	0	0	0	0	33.336	33.336	0		0			52	0	0	0	0	29.834	29.834	-3.136		3.136			52	0	0	0	0	29.864	0		0			52	0	0	0	0	21.706	21.706	-1.475		1.475			52	0
	53	0	0	0	0	33.336	33.336	-1.654		1.654			53	0	0	0	0	32.97	32.97	0		0			53	0	0	0	0	29.864	0		0			53	0	0	0	0	23.181	23.181	-0.896		0.896			53	0
	54	0	0	0	0	34.99	34.99	0		0			54	0	0	0	0	32.97	32.97	0		0			54	0	0	0	0	29.864	0		0			54	0	0	0	0	24.077	24.077	-0.841		0.841			54	0
	55	0	0	0	0	34.99	34.99	0		0			55	0	0	0	0	32.97	32.97	0		0			55	0	0	0	0	29.864	0		0			55	0	0	0	0	24.918	24.918	-1.561		1.561			55	0
	56	0	0	0	0	34.99	34.99	-1.606		1.606			56	0	0	0	0	32.97	32.97	0		0			56	0	0	0	0	29.864	0		0			56	0	0	0	0	26.479	26.479	0		0			56	0
	57	0	0	0	0	36.596	36.596	0		0			57	0	0	0	0	32.97	32.97	0		0			57	0	0	0	0	29.864	0		0			57	0	0	0	0	26.479	26.479	-2.259		2.259			57	0
	58	0	0	0	0	36.596	36.596	-1.156		1.156			58	0	0	0	0	32.97	32.97	0		0			58	0	0	0	0	29.864	0		0			58	0	0	0	0	28.738	28.738	-1.275		1.275			58	0
	59	0	0	0	0	37.752	37.752	-0.99		0.99			59	0	0	0	0	32.97	32.97	0		0			59	0	0	0	0	29.864	0		0			59	0	0	0	0	30.013	30.013	0		0			59	0
	60	0	0	0	0	38.742	38.742	-1.803		1.803			60	0	0	0	0	32.97	32.97	0		0			60	0	0	0	0	29.864	0		0			60	0	0	0	0	30.013	30.013	-0.866		0.866			60	0
	61	0	0	0	0	40.545	40.545	0		0			61	0	0	0	0	32.97	32.97	0		0			61	0	0	0	0	29.864	0		0			61	0	0	0	0	30.879	30.879	-1.21		1.21			61	0
	62	0	0	0	0	40.545	40.545	1.652					62	0	0	0	0	32.97	32.97	0		0			62	0	0	0	0	29.864	0		0			62	0	0	0	0	32.089	32.089	0		0			62	0
	63	0	0	0	0	38.893	38.893	-1.376		1.376			63	0	0	0	0	32.97	32.97	0		0			63	0	0	0	0	29.864	0		0			63	0	0	0	0	32.089	32.089	0		0			63	0
	64	0	0	0	0	40.269	40.269	0		0			64	0	0	0	0	32.97	32.97	0		0			64	0	0	0	0	29.864	0		0			64	0	0	0	0	32.089	32.089	0		0			64	0
	65	0	0	0	0	40.269	40.269	0		0			65	0	0	0	0	32.97	32.97	0		0			65	0	0	0	0	29.864	0		0			65	0	0	0	0	32.089	32.089	0		0			65	0
	66	0	0	0	0	40.269	40.269	0		0			66	0	0	0	0	32.97	32.97	0		0			66	0	0	0	0	29.864	0		0			66	0	0	0	0	32.089	32.089	-0.756		0.756			66	0
	67	0	0	0	0	40.269	40.269	0		0			67	0	0	0	0	32.97	32.97	0		0			67	0	0	0	0	29.864	0		0			67	0	0	0	0	32.845	32.845	0		0			67	0
	68	0	0	0	0	40.269	40.269	24.468					68	0	0	0	0	32.97	32.97	0		0			68	0	0	0	0	29.864	0		0			68	0	0	0	0	32.845	32.845	-1.753		1.753			68	0
	69	0	0	0	0	15.801	15.801	15.104					69	0	0	0	0	32.97	32.97	0		0			69	0	0	0	0	29.864	0		0			69	0	0	0	0	34.598	34.598	0		0			69	0
	70	0	0	0	0	0.697	0.697	-2.903		2.903			70	0	0	0	0	32.97	32.97	0		0			70	0	0	0	0	29.864	0		0			70	0	0	0	0	34.598	34.598	0		0			70	0
	71	0	0	0	0	3.6	3.6	-3.368		3.368			71	0	0	0	0	32.97	32.97	0		0			71	0	0	0	0	29.864	0		0			71	0	0	0	0	34.598	34.598	0		0			71	0
	72	0	0	0	0	6.968	6.968	-3.42		3.42			72	0	0	0	0	32.97	32.97	0		0			72	0	0	0	0	29.864	0		0			72	0	0	0	0	34.598	34.598	0		0			72	0
	73	0	0	0	0	10.388	10.388	-3.682		3.682			73	0	0	0	0	32.97	32.97	0		0			73	0	0	0	0	29.864	8.024					73	0	0	0	0	34.598	34.598	-0.912		0.912			73	0
	74	0	0	0	0	14.07	14.07	-2.449		2.449			74	0	0	0	0	32.97	32.97	0		0			74	0	0	0	0	21.84	-1.358		1.358			74	0	0	0	0	35.51	35.51	0		0			74	0
	75	0	0	0	0	16.519	16.519	-1.069		1.069			75	0	0	0	0	32.97	32.97	0		0			75	0	0	0	0	23.198	-1.502		1.502			75	0	0	0	0	35.51	35.51	0		0			75	0
	76	0	0	0	0	17.588	17.588	-1.913		1.913			76	0	0	0	0	32.97	32.97	-1.028		1.028			76	0	0	0	0	24.7	0		0			76	0	0	0	0	35.51	35.51	-1.003		1.003			76	0
	77	0	0	0	0	19.501	19.501	-1.156		1.156			77	0	0	0	0	33.998	33.998	7.74					77	0	0	0	0	24.7	0		0			77	0	0	0	0	36.513	36.513	0		0			77	0
	78	0	0	0	0	20.657	20.657	-2.335		2.335			78	0	0	0	0	26.258	26.258	0		0			78	0	0	0	0	24.7	0		0			78	0	0	0	0	36.513	36.513	0		0			78	0
	79	0	0	0	0	22.992	22.992	-2.174		2.174			79	0	0	0	0	26.258	26.258	0		0			79	0	0	0	0	24.7	0		0			79	0	0	0	0	36.513	36.513	0.383					79	0
	80	0	0	0	0	25.166	25.166	0		0			80	0	0	0	0	26.258	26.258	0		0			80	0	0	0	0	24.7	0		0			80	0	0	0	0	36.13	36.13	0		0			80	0
	81	0	0	0	0	25.166	25.166	-3.169		3.169			81	0	0	0	0	26.258	26.258	0		0			81	0	0	0	0	24.7	0		0			81	0	0	0	0	36.13	36.13	38.592					81	0
	82	0	0	0	0	28.335	28.335	0		0			82	0	0	0	0	26.258	26.258	0		0			82	0	0	0	0	24.7	0		0			82	0	0	0	0	2.462	-2.462	2.094					82	0
	83	0	0	0	0	28.335	28.335	-1.869		1.869			83	0	0	0	0	26.258	26.258	0		0			83	0	0	0	0	24.7	0		0			83	0	0	0	0	4.556	-4.556	-1.495		1.495			83	0
	84	0	0	0	0	30.204	30.204	-1.782		1.782			84	0	0	0	0	26.258	26.258	0		0			84	0	0	0	0	24.7	0		0			84	0	0	0	0	3.061	-3.061	-3.367		3.367			84	0
	85	0	0	0	0	31.986	31.986	-2.014		2.014			85	0	0	0	0	26.258	26.258	0		0			85	0	0	0	0	24.7	0		0			85	0	0	0	0	0.306	0.306	-3.237		3.237			85	0
	86	0	0	0	0	34	34	-2.299		2.299			86	0	0	0	0	26.258	26.258	0		0			86	0	0	0	0	24.7	0		0			86	0	0	0	0	3.543	3.543	-1.307		1.307			86	0
	87	0	0	0	0	36.299	36.299	0		0			87	0	0	0	0	26.258	26.258	0		0			87	0	0	0	0	24.7	0		0			87	0	0	0	0	4.85	4.85	-2.105		2.105			87	0
	88	0	0	0	0	36.299	36.299	0		0			88	0	0	0	0	26.258	26.258	-1.732		1.732			88	0	0	0	0	24.7	0		0			88	0	0	0	0	6.955	6.955	-2.4		2.4			88	0
	89	0	0	0	0	36.299	36.299	0		0			89	0	0	0	0	27.99	27.99	0		0			89	0	0	0	0	24.7	0		0			89	0	0	0	0	9.355	9.355	-2.689		2.689			89	0
	90	0	0	0	0	36.299	36.299	-1.016		1.016			90	0	0	0	0	27.99	27.99	0		0			90	0	0	0	0	24.7	-1.884		1.884			90	0	0	0	0	12.044	12.044	-2.588		2.588			90	0
	91	0	0	0	0	37.315	37.315	0		0			91	0	0	0	0	27.99	27.99	0		0			91	0	0	0	0	26.584	0		0			91	0	0	0	0	14.632	14.632	-1.981		1.981			91	0
	92	0	0	0	0	37.315	37.315	0		0			92	0	0	0	0	27.99	27.99	0		0			92	0	0	0	0	26.584	0		0			92	0	0	0	0	16.613	16.613	-2.221		2.221			92	0
	93	0	0	0	0	37.315	37.315	0		0			93	0	0	0	0	27.99	27.99	0		0			93	0	0	0	0	26.584	0		0			93	0	0	0	0	18.834	18.834	-1.993		1.993			93	0
	94	0	0	0	0	37.315	37.315	0		0			94	0	0	0	0	27.99	27.99	0		0			94	0	0	0	0	26.584	0		0			94	0	0	0	0	20.827	20.827	0		0			94	0
	95	0	0	0	0	37.315	37.315	0		0			95	0	0	0	0	27.99	27.99	0		0			95	0	0	0	0	26.584	0		0			95	0	0	0	0	20.827	20.827	-1.114		1.114			95	0
	96	0	0	0	0	37.315	37.315	0		0			96	0	0	0	0	27.99	27.99	0		0			96	0	0	0	0	26.584	0		0			96	0	0	0	0	21.941	21.941	-3.434		3.434			96	0
	97	0	0	0	0	37.315	37.315	0		0			97	0	0	0	0	27.99	27.99	0		0			97	0	0	0	0	26.584	0		0			97	0	0	0	0	25.375	25.375	0		0			97	0
	98	0	0	0	0	37.315	37.315	0		0			98	0	0	0	0	27.99	27.99	0		0			98	0	0	0	0	26.584	0		0			98	0	0	0	0	25.375	25.375	-1.042		1.042			98	0
	99	0	0	0	0	37.315	37.315	0		0			99	0	0	0	0	27.99	27.99	0		0			99	0	0	0	0	26.584	0		0			99	0	0	0	0	26.417	26.417	-1.634		1.634			99	0
	100	0	0	0	0	37.315	37.315	-2.515		2.515			100	0	0	0	0	27.99	27.99	0		0			100	0	0	0	0	26.584	0		0			100	0	0	0	0	28.051	28.051	0		0			100	0
	101	0	0	0	0	39.83	39.83	0		0			101	0	0	0	0	27.99	27.99	0		0			101	0	0	0	0	26.584	0		0			101	0	0	0	0	28.051	28.051	0		0			101	0
	102	0	0	0	0	39.83	39.83	0		0			102	0	0	0	0	27.99	27.99	0		0			102	0	0	0	0	26.584	0		0			102	0	0	0	0	28.051	28.051	0		0			102	0
	103	0	0	0	0	39.83	39.83	0		0			103	0	0	0	0	27.99	27.99	-1.688		1.688			103	0	0	0	0	26.584	0		0			103	0	0	0	0	28.051	28.051	-1.981		1.981			103	0
	104	0	0	0	0	39.83	39.83	0		0			104	0	0	0	0	29.678	29.678	0		0			104	0	0	0	0	26.584	0		0			104	0	0	0	0	30.032	30.032	0		0			104	0
	105	0	0	0	0	39.83	39.83	0		0			105	0	0	0	0	29.678	29.678	0		0			105	0	0	0	0	26.584	-1.287		1.287			105	0	0	0	0	30.032	30.032	0		0			105	0
	106	0	0	0	0	39.83	39.83	0		0			106	0	0	0	0	29.678	29.678	0		0			106	0	0	0	0	27.871	0		0			106	0	0	0	0	30.032	30.032	0		0			106	0
	107	0	0	0	0	39.83	39.83	0		0			107	0	0	0	0	29.678	29.678	0		0			107	0	0	0	0	27.871	0		0			107	0	0	0	0	30.032	30.032	-0.985		0.985			107	0
	108	0	0	0	0	39.83	39.83	0		0			108	0	0	0	0	29.678	29.678	0		0			108	0	0	0	0	27.871	0		0			108	0	0	0	0	31.017	31.017	0		0			108	0
	109	0	0	0	0	39.83	39.83	0		0			109	0	0	0	0	29.678	29.678	0		0			109	0	0	0	0	27.871	0		0			109	0	0	0	0	31.017	31.017	0		0			109	0
	110	0	0	0	0	39.83	39.83	38.46					110	0	0	0	0	29.678	29.678	0		0			110	0	0	0	0	27.871	0		0			110	0	0	0	0	31.017	31.017	0		0			110	0
	111	0	0	0	0	1.37	1.37	1.256					111	0	0	0	0	29.678	29.678	0		0			111	0	0	0	0	27.871	0		0			111	0	0	0	0	31.017	31.017	0		0			111	0
	112	0	0	0	0	0.114	0.114	-2.01		2.01			112	0	0	0	0	29.678	29.678	0		0			112	0	0	0	0	27.871	0		0			112	0	0	0	0	31.017	31.017	-2.421		2.421			112	0
	113	0	0	0	0	2.124	2.124	-4.513		4.513			113	0	0	0	0	29.678	29.678	0		0			113	0	0	0	0	27.871	0		0			113	0	0	0	0	33.438	33.438	0		0			113	0
	114	0	0	0	0	6.637	6.637	-3.282		3.282			114	0	0	0	0	29.678	29.678	0		0			114	0	0	0	0	27.871	0		0			114	0	0	0	0	33.438	33.438	0		0			114	0
	115	0	0	0	0	9.919	9.919	-2.11		2.11			115	0	0	0	0	29.678	29.678	0		0			115	0	0	0	0	27.871	7.975					115	0	0	0	0	33.438	33.438	0		0			115	0
	116	0	0	0	0	12.029	12.029	-2.213		2.213			116	0	0	0	0	29.678	29.678	0		0			116	0	0	0	0	19.896	-1.594		1.594			116	0	0	0	0	33.438	33.438	0		0			116	0
	117	0	0	0	0	14.242	14.242	-1.35		1.35			117	0	0	0	0	29.678	29.678	0		0			117	0	0	0	0	21.49	0		0			117	0	0	0	0	33.438	33.438	0		0			117	0
	118	0	0	0	0	15.592	15.592	-2.478		2.478			118	0	0	0	0	29.678	29.678	0		0			118	0	0	0	0	21.49	0		0			118	0	0	0	0	33.438	33.438	0		0			118	0
	119	0	0	0	0	18.07	18.07	-1.875		1.875			119	0	0	0	0	29.678	29.678	0		0			119	0	0	0	0	21.49	0		0			119	0	0	0	0	33.438	33.438	0		0			119	0
	120	0	0	0	0	19.945	19.945	-1.604		1.604			120	0	0	0	0	29.678	29.678	0		0			120	0	0	0	0	21.49	-1.243		1.243			120	0	0	0	0	33.438	33.438	0		0			120	0
	121	0	0	0	0	21.549	21.549	-1.081		1.081			121	0	0	0	0	29.678	29.678	14.013					121	0	0	0	0	22.733	0		0			121	0	0	0	0	33.438	33.438	0		0			121	0
	122	0	0	0	0	22.63	22.63	-1.639		1.639			122	0	0	0	0	15.665	15.665	-2.184		2.184			122	0	0	0	0	22.733	-1.439		1.439			122	0	0	0	0	33.438	33.438	0		0			122	0
	123	0	0	0	0	24.269	24.269	-1.627		1.627			123	0	0	0	0	17.849	17.849	0		0			123	0	0	0	0	24.172	0		0			123	0	0	0	0	33.438	33.438	0		0			123	0
	124	0	0	0	0	25.896	25.896	-1.312		1.312			124	0	0	0	0	17.849	17.849	0		0			124	0	0	0	0	24.172	0		0			124	0	0	0	0	33.438	33.438	0		0			124	0
	125	0	0	0	0	27.208	27.208	-1.638		1.638			125	0	0	0	0	17.849	17.849	0		0			125	0	0	0	0	24.172	0		0			125	0	0	0	0	33.438	33.438	0		0			125	0
	126	0	0	0	0	28.846	28.846	-1.783		1.783			126	0	0	0	0	17.849	17.849	-1.161		1.161			126	0	0	0	0	24.172	0		0			126	0	0	0	0	33.438	33.438	0		0			126	0
	127	0	0	0	0	30.629	30.629	-0.776		0.776			127	0	0	0	0	19.01	19.01	0		0			127	0	0	0	0	24.172	0		0			127	0	0	0	0	33.438	33.438	0		0			127	0
	128	0	0	0	0	31.405	31.405	-2.555		2.555			128	0	0	0	0	19.01	19.01	0		0			128	0	0	0	0	24.172	0		0			128	0	0	0	0	33.438	33.438	0		0			128	0
	129	0	0	0	0	33.96	33.96	-2.507		2.507			129	0	0	0	0	19.01	19.01	0		0			129	0	0	0	0	24.172	0		0			129	0	0	0	0	33.438	33.438	0		0			129	0
	130	0	0	0	0	36.467	36.467	0		0			130	0	0	0	0	19.01	19.01	0		0			130	0	0	0	0	24.172	0		0			130	0	0	0	0	33.438	33.438	0		0			130	0
	131	0	0	0	0	36.467	36.467	0		0			131	0	0	0	0	19.01	19.01	0		0			131	0	0	0	0	24.172	-1.372		1.372			131	0	0	0	0	33.438	33.438	33.132					131	0
	132	0	0	0	0	36.467	36.467	0		0			132	0	0	0	0	19.01	19.01	0		0			132	0	0	0	0	25.544	0		0			132	0	0	0	0	0.306	0.306	7.779					132	0
	133	0	0	0	0	36.467	36.467	0		0			133	0	0	0	0	19.01	19.01	0		0			133	0	0	0	0	25.544	0		0			133	0	0	0	0	7.473	-7.473	-3.553		3.553			133	0
	134	0	0	0	0	36.467	36.467	0		0			134	0	0	0	0	19.01	19.01	-1.379		1.379			134	0	0	0	0	25.544	0		0			134	0	0	0	0	3.92	-3.92	-4.226		4.226			134	0
	135	0	0	0	0	36.467	36.467	-1.145		1.145			135	0	0	0	0	20.389	20.389	0		0			135	0	0	0	0	25.544	0		0			135	0	0	0	0	0.306	0.306	-2.782		2.782			135	0
	136	0	0	0	0	37.612	37.612	0		0			136	0	0	0	0	20.389	20.389	0		0			136	0	0	0	0	25.544	0		0			136	0	0	0	0	3.088	3.088	-2.281		2.281			136	0
	137	0	0	0	0	37.612	37.612	0		0			137	0	0	0	0	20.389	20.389	0		0			137	0	0	0	0	25.544	0		0			137	0	0	0	0	5.369	5.369	-2.721		2.721			137	0
	138	0	0	0	0	37.612	37.612	0		0			138	0	0	0	0	20.389	20.389	0		0			138	0	0	0	0	25.544	0		0			138	0	0	0	0	8.09	8.09	-2.712		2.712			138	0
	139	0	0	0	0	37.612	37.612	0		0			139	0	0	0	0	20.389	20.389	-0.98		0.98			139	0	0	0	0	25.544	0		0			139	0	0	0	0	10.802	10.802	-0.897		0.897			139	0
	140	0	0	0	0	37.612	37.612	0		0			140	0	0	0	0	21.369	21.369	0		0			140	0	0	0	0	25.544	-1.138		1.138			140	0	0	0	0	11.699	11.699	-1.96		1.96			140	0
	141	0	0	0	0	37.612	37.612	0		0			141	0	0	0	0	21.369	21.369	0		0			141	0	0	0	0	26.682	0		0			141	0	0	0	0	13.659	13.659	-3.036		3.036			141	0
	142	0	0	0	0	37.612	37.612	-0.996		0.996			142	0	0	0	0	21.369	21.369	0		0			142	0	0	0	0	26.682	0		0			142	0	0	0	0	16.695	16.695	0		0			142	0
	143	0	0	0	0	38.608	38.608	25.553					143	0	0	0	0	21.369	21.369	-2.187		2.187			143	0	0	0	0	26.682	0		0			143	0	0	0	0	16.695	16.695	-2.141		2.141			143	0
	144	0	0	0	0	13.055	13.055	0		0			144	0	0	0	0	23.556	23.556	0		0			144	0	0	0	0	26.682	0		0			144	0	0	0	0	18.836	18.836	-3		3			144	0
	145	0	0	0	0	13.055	13.055	0		0			145	0	0	0	0	23.556	23.556	0		0			145	0	0	0	0	26.682	0		0			145	0	0	0	0	21.836	21.836	0		0			145	0
	146	0	0	0	0	13.055	13.055	-2.043		2.043			146	0	0	0	0	23.556	23.556	0		0			146	0	0	0	0	26.682	0		0			146	0	0	0	0	21.836	21.836	0		0			146	0
	147	0	0	0	0	15.098	15.098	0		0			147	0	0	0	0	23.556	23.556	0		0			147	0	0	0	0	26.682	0		0			147	0	0	0	0	21.836	21.836	-1.479		1.479			147	0
	148	0	0	0	0	15.098	15.098	0		0			148	0	0	0	0	23.556	23.556	0		0			148	0	0	0	0	26.682	0		0			148	0	0	0	0	23.315	23.315	0		0			148	0
	149	0	0	0	0	15.098	15.098	0		0			149	0	0	0	0	23.556	23.556	0		0			149	0	0	0	0	26.682	0		0			149	0	0	0	0	23.315	23.315	-2.849		2.849			149	0
	150	0	0	0	0	15.098	15.098	-3.649		3.649			150	0	0	0	0	23.556	23.556	-1.814		1.814			150	0	0	0	0	26.682	0		0			150	0	0	0	0	26.164	26.164	0		0			150	0
	151	0	0	0	0	18.747	18.747	-1.516		1.516			151	0	0	0	0	25.37	25.37	0		0			151	0	0	0	0	26.682	0		0			151	0	0	0	0	26.164	26.164	0		0			151	0
	152	0	0	0	0	20.263	20.263	0		0			152	0	0	0	0	25.37	25.37	0		0			152	0	0	0	0	26.682	0		0			152	0	0	0	0	26.164	26.164	-2.024		2.024			152	0
	153	0	0	0	0	20.263	20.263	0		0			153	0	0	0	0	25.37	25.37	0		0			153	0	0	0	0	26.682	0		0			153	0	0	0	0	28.188	28.188	0		0			153	0
	154	0	0	0	0	20.263	20.263	-2.528		2.528			154	0	0	0	0	25.37	25.37	0		0			154	0	0	0	0	26.682	0		0			154	0	0	0	0	28.188	28.188	0		0			154	0
	155	0	0	0	0	22.791	22.791	0		0			155	0	0	0	0	25.37	25.37	0		0			155	0	0	0	0	26.682	0		0			155	0	0	0	0	28.188	28.188	0		0			155	0
	156	0	0	0	0	22.791	22.791	0		0			156	0	0	0	0	25.37	25.37	0		0			156	0	0	0	0	26.682	0		0			156	0	0	0	0	28.188	28.188	-1.3		1.3			156	0
	157	0	0	0	0	22.791	22.791	0		0			157	0	0	0	0	25.37	25.37	0		0			157	0	0	0	0	26.682	0		0			157	0	0	0	0	29.488	29.488	0		0			157	0
	158	0	0	0	0	22.791	22.791	-1.156		1.156			158	0	0	0	0	25.37	25.37	0		0			158	0	0	0	0	26.682	0		0			158	0	0	0	0	29.488	29.488	0		0			158	0
	159	0	0	0	0	23.947	23.947	-1.963		1.963			159	0	0	0	0	25.37	25.37	0		0			159	0	0	0	0	26.682	0		0			159	0	0	0	0	29.488	29.488	0		0			159	0
	160	0	0	0	0	25.91	25.91	0		0			160	0	0	0	0	25.37	25.37	-2.186		2.186			160	0	0	0	0	26.682	0		0			160	0	0	0	0	29.488	29.488	0		0			160	0
	161	0	0	0	0	25.91	25.91	0		0			161	0	0	0	0	27.556	27.556	0		0			161	0	0	0	0	26.682	0		0			161	0	0	0	0	29.488	29.488	-1.431		1.431			161	0
	162	0	0	0	0	25.91	25.91	-1.52		1.52			162	0	0	0	0	27.556	27.556	0		0			162	0	0	0	0	26.682	0.604					162	0	0	0	0	30.919	30.919	0		0			162	0
	163	0	0	0	0	27.43	27.43	0		0			163	0	0	0	0	27.556	27.556	0		0			163	0	0	0	0	26.078	0		0			163	0	0	0	0	30.919	30.919	0		0			163	0
	164	0	0	0	0	27.43	27.43	0		0			164	0	0	0	0	27.556	27.556	0		0			164	0	0	0	0	26.078	0		0			164	0	0	0	0	30.919	30.919	0		0			164	0
	165	0	0	0	0	27.43	27.43	-3.174		3.174			165	0	0	0	0	27.556	27.556	0		0			165	0	0	0	0	26.078	0		0			165	0	0	0	0	30.919	30.919	-1.676		1.676			165	0
	166	0	0	0	0	30.604	30.604	0		0			166	0	0	0	0	27.556	27.556	0		0			166	0	0	0	0	26.078	0.995					166	0	0	0	0	32.595	32.595	0		0			166	0
	167	0	0	0	0	30.604	30.604	0		0			167	0	0	0	0	27.556	27.556	0		0			167	0	0	0	0	25.083	5.716					167	0	0	0	0	32.595	32.595	5.654		-5.654			167	0
	168	0	0	0	0	30.604	30.604	-2.119		2.119			168	0	0	0	0	27.556	27.556	0		0			168	0	0	0	0	19.367	-0.948		0.948			168	0	0	0	0	26.941	26.941	0		0			168	0
	169	0	0	0	0	32.723	32.723	34.977					169	0	0	0	0	27.556	27.556	0		0			169	0	0	0	0	20.315	-1.401		1.401			169	0	0	0	0	26.941	26.941	0		0			169	0
	170	0	0	0	0	2.254	-2.254	-2.324		2.324			170	0	0	0	0	27.556	27.556	0		0			170	0	0	0	0	21.716	0		0			170	0	0	0	0	26.941	26.941	0		0			170	0
	171	0	0	0	0	0.07	0.07	-4.406		4.406			171	0	0	0	0	27.556	27.556	0		0			171	0	0	0	0	21.716	0		0			171	0	0	0	0	26.941	26.941	-0.62		0.62			171	0
	172	0	0	0	0	4.476	4.476	-1.864		1.864			172	0	0	0	0	27.556	27.556	0		0			172	0	0	0	0	21.716	0		0			172	0	0	0	0	27.561	27.561	0		0			172	0
	173	0	0	0	0	6.34	6.34	-2.109		2.109			173	0	0	0	0	27.556	27.556	0		0			173	0	0	0	0	21.716	0		0			173	0	0	0	0	27.561	27.561	0		0			173	0
	174	0	0	0	0	8.449	8.449	-1.799		1.799			174	0	0	0	0	27.556	27.556	0		0			174	0	0	0	0	21.716	0		0			174	0	0	0	0	27.561	27.561	0		0			174	0
	175	0	0	0	0	10.248	10.248	-2.473		2.473			175	0	0	0	0	27.556	27.556	0		0			175	0	0	0	0	21.716	0		0			175	0	0	0	0	27.561	27.561	-1.978		1.978			175	0
	176	0	0	0	0	12.721	12.721	-2.275		2.275			176	0	0	0	0	27.556	27.556	0		0			176	0	0	0	0	21.716	8.399					176	0	0	0	0	29.539	29.539	0		0			176	0
	177	0	0	0	0	14.996	14.996	-2.217		2.217			177	0	0	0	0	27.556	27.556	0		0			177	0	0	0	0	13.317	-1.579		1.579			177	0	0	0	0	29.539	29.539	0		0			177	0
	178	0	0	0	0	17.213	17.213	-2.07		2.07			178	0	0	0	0	27.556	27.556	31.429					178	0	0	0	0	14.896	-1.962		1.962			178	0	0	0	0	29.539	29.539	0		0			178	0
	179	0	0	0	0	19.283	19.283	-1.095		1.095			179	0	0	0	0	3.873	-3.873	-4.261		4.261			179	0	0	0	0	16.858	0		0			179	0	0	0	0	29.539	29.539	0		0			179	0
	180	0	0	0	0	20.378	20.378	-0.624		0.624			180	0	0	0	0	0.388	0.388	-1.798		1.798			180	0	0	0	0	16.858	-0.377		0.377			180	0	0	0	0	29.539	29.539	0		0			180	0
	181	0	0	0	0	21.002	21.002	-1.574		1.574			181	0	0	0	0	2.186	2.186	-1.662		1.662			181	0	0	0	0	17.235	-0.766		0.766			181	0	0	0	0	29.539	29.539	0		0			181	0
	182	0	0	0	0	22.576	22.576	0		0			182	0	0	0	0	3.848	3.848	-2.874		2.874			182	0	0	0	0	18.001	0		0			182	0	0	0	0	29.539	29.539	0		0			182	0
	183	0	0	0	0	22.576	22.576						183	0	0	0	0	6.722	6.722						183	0	0	0	0	18.001						183	0	0	0	0	29.539	29.539						183	0
[truncated: 116 more columns]

## Sheet: Hoja4
	Trial#2 - 10dpt
	(control)
	4 frames per second
		EtOH 10dpt	ser02						degrees rot	# saccades	speed rotat	speed average		EtOH 10dpt	ser04						degrees rot	# saccades	speed rotat	speed average		EtOH 10dpt	ser07					degrees rot	# saccades	speed rotat	speed average		EtOH 10dpt	ser11						degrees rot	# saccades	speed rotat	speed average		EtOH 10dpt
		1	0	0	0	0	11.744	11.744	-1.586	8	1.586	1.42655		1	0	0	0	0	26.369	26.369	-1.384	8	1.384	1.41482		1	0	0	0	0	28.257	0	1	0	0.467194		1	0	0	0	0	23.035	23.035	0	6	0	1.31172		1
		2	0	0	0	0	13.33	13.33	-0.952		0.952			2	0	0	0	0	27.753	27.753	33.723					2	0	0	0	0	28.257	0		0			2	0	0	0	0	23.035	23.035	-2.579		2.579			2
		3	0	0	0	0	14.282	14.282	-0.613		0.613			3	0	0	0	0	5.97	-5.97	0		0			3	0	0	0	0	28.257	-1.611		1.611			3	0	0	0	0	25.614	25.614	-0.46		0.46			3
		4	0	0	0	0	14.895	14.895	26.834					4	0	0	0	0	5.97	-5.97	-3.317		3.317			4	0	0	0	0	29.868	0		0			4	0	0	0	0	26.074	26.074	0		0			4
		5	0	0	0	0	11.939	-11.939	-2.329		2.329			5	0	0	0	0	2.653	-2.653	-2.7		2.7			5	0	0	0	0	29.868	0		0			5	0	0	0	0	26.074	26.074	-1.499		1.499			5
		6	0	0	0	0	9.61	-9.61	-2.525		2.525			6	0	0	0	0	0.047	0.047	-1.326		1.326			6	0	0	0	0	29.868	21.138					6	0	0	0	0	27.573	27.573	0		0			6
		7	0	0	0	0	7.085	-7.085	-2.692		2.692			7	0	0	0	0	1.373	1.373	-2.456		2.456			7	0	0	0	0	8.73	0		0			7	0	0	0	0	27.573	27.573	-2.512		2.512			7
		8	0	0	0	0	4.393	-4.393	-7.706		7.706			8	0	0	0	0	3.829	3.829	-1.578		1.578			8	0	0	0	0	8.73	-1.292		1.292			8	0	0	0	0	30.085	30.085	0		0			8
		9	0	0	0	0	3.313	3.313	3.158					9	0	0	0	0	5.407	5.407	-0.92		0.92			9	0	0	0	0	10.022	-1.511		1.511			9	0	0	0	0	30.085	30.085	-1.628		1.628			9
		10	0	0	0	0	0.155	0.155	-0.961		0.961			10	0	0	0	0	6.327	6.327	-1.814		1.814			10	0	0	0	0	11.533	-2.316		2.316			10	0	0	0	0	31.713	31.713	0		0			10
		11	0	0	0	0	1.116	1.116	-3.291		3.291			11	0	0	0	0	8.141	8.141	-2.087		2.087			11	0	0	0	0	13.849	-2.15		2.15			11	0	0	0	0	31.713	31.713	36.052					11
		12	0	0	0	0	4.407	4.407	-1.887		1.887			12	0	0	0	0	10.228	10.228	-1.462		1.462			12	0	0	0	0	15.999	-1.393		1.393			12	0	0	0	0	4.339	-4.339	-0.769		0.769			12
		13	0	0	0	0	6.294	6.294	-1.135		1.135			13	0	0	0	0	11.69	11.69	-1.136		1.136			13	0	0	0	0	17.392	-0.874		0.874			13	0	0	0	0	3.57	-3.57	-4.02		4.02			13
		14	0	0	0	0	7.429	7.429	-1.516		1.516			14	0	0	0	0	12.826	12.826	-1.129		1.129			14	0	0	0	0	18.266	-1.709		1.709			14	0	0	0	0	0.45	0.45	-0.811		0.811			14
		15	0	0	0	0	8.945	8.945	-0.969		0.969			15	0	0	0	0	13.955	13.955	-0.875		0.875			15	0	0	0	0	19.975	-1.783		1.783			15	0	0	0	0	1.261	1.261	-2.078		2.078			15
		16	0	0	0	0	9.914	9.914	0		0			16	0	0	0	0	14.83	14.83	-1.239		1.239			16	0	0	0	0	21.758	-1.211		1.211			16	0	0	0	0	3.339	3.339	-2.358		2.358			16
		17	0	0	0	0	9.914	9.914	-1.611		1.611			17	0	0	0	0	16.069	16.069	-0.487		0.487			17	0	0	0	0	22.969	0		0			17	0	0	0	0	5.697	5.697	-1.821		1.821			17
		18	0	0	0	0	11.525	11.525	-1.331		1.331			18	0	0	0	0	16.556	16.556	-1.356		1.356			18	0	0	0	0	22.969	-1.332		1.332			18	0	0	0	0	7.518	7.518	-0.905		0.905			18
		19	0	0	0	0	12.856	12.856	-1.449		1.449			19	0	0	0	0	17.912	17.912	-1.303		1.303			19	0	0	0	0	24.301	0		0			19	0	0	0	0	8.423	8.423	-1.206		1.206			19
		20	0	0	0	0	14.305	14.305	-0.315		0.315			20	0	0	0	0	19.215	19.215	-0.94		0.94			20	0	0	0	0	24.301	0		0			20	0	0	0	0	9.629	9.629	-1.715		1.715			20
		21	0	0	0	0	14.62	14.62	0		0			21	0	0	0	0	20.155	20.155	-2.057		2.057			21	0	0	0	0	24.301	-3.093		3.093			21	0	0	0	0	11.344	11.344	-1.018		1.018			21
		22	0	0	0	0	14.62	14.62	0		0			22	0	0	0	0	22.212	22.212	0		0			22	0	0	0	0	27.394	0		0			22	0	0	0	0	12.362	12.362	-1.502		1.502			22
		23	0	0	0	0	14.62	14.62	-1.077		1.077			23	0	0	0	0	22.212	22.212	-1.533		1.533			23	0	0	0	0	27.394	-1.67		1.67			23	0	0	0	0	13.864	13.864	-1.236		1.236			23
		24	0	0	0	0	15.697	15.697	-1.557		1.557			24	0	0	0	0	23.745	23.745	0		0			24	0	0	0	0	29.064	0		0			24	0	0	0	0	15.1	15.1	-1.707		1.707			24
		25	0	0	0	0	17.254	17.254	0		0			25	0	0	0	0	23.745	23.745	-0.57		0.57			25	0	0	0	0	29.064	0		0			25	0	0	0	0	16.807	16.807	-1.406		1.406			25
		26	0	0	0	0	17.254	17.254	0		0			26	0	0	0	0	24.315	24.315	-1.334		1.334			26	0	0	0	0	29.064	-1.05		1.05			26	0	0	0	0	18.213	18.213	-1.353		1.353			26
		27	0	0	0	0	17.254	17.254	30.547					27	0	0	0	0	25.649	25.649	0		0			27	0	0	0	0	30.114	0		0			27	0	0	0	0	19.566	19.566	-1.715		1.715			27
		28	0	0	0	0	13.293	-13.293	-4.758		4.758			28	0	0	0	0	25.649	25.649	-1.548		1.548			28	0	0	0	0	30.114	0		0			28	0	0	0	0	21.281	21.281	-0.407		0.407			28
		29	0	0	0	0	8.535	-8.535	-2.827		2.827			29	0	0	0	0	27.197	27.197	0		0			29	0	0	0	0	30.114	0		0			29	0	0	0	0	21.688	21.688	0		0			29
		30	0	0	0	0	5.708	-5.708	-1.106		1.106			30	0	0	0	0	27.197	27.197	34.507					30	0	0	0	0	30.114	0		0			30	0	0	0	0	21.688	21.688	-2.794		2.794			30
		31	0	0	0	0	4.602	-4.602	-1.262		1.262			31	0	0	0	0	7.31	-7.31	-2.005		2.005			31	0	0	0	0	30.114	0		0			31	0	0	0	0	24.482	24.482	0		0			31
		32	0	0	0	0	3.34	-3.34	-1.189		1.189			32	0	0	0	0	5.305	-5.305	-1.635		1.635			32	0	0	0	0	30.114	0		0			32	0	0	0	0	24.482	24.482	0		0			32
		33	0	0	0	0	2.151	-2.151	0		0			33	0	0	0	0	3.67	-3.67	-1.372		1.372			33	0	0	0	0	30.114	0		0			33	0	0	0	0	24.482	24.482	0		0			33
		34	0	0	0	0	2.151	-2.151	-2.466		2.466			34	0	0	0	0	2.298	-2.298	-2.506		2.506			34	0	0	0	0	30.114	0		0			34	0	0	0	0	24.482	24.482	-1.111		1.111			34
		35	0	0	0	0	0.315	0.315	-2.807		2.807			35	0	0	0	0	0.208	0.208	-1.115		1.115			35	0	0	0	0	30.114	0		0			35	0	0	0	0	25.593	25.593	-1.071		1.071			35
		36	0	0	0	0	3.122	3.122	-1.646		1.646			36	0	0	0	0	1.323	1.323	-1.82		1.82			36	0	0	0	0	30.114	19.07					36	0	0	0	0	26.664	26.664	-1.997		1.997			36
		37	0	0	0	0	4.768	4.768	0		0			37	0	0	0	0	3.143	3.143	-2.939		2.939			37	0	0	0	0	11.044	-1.563		1.563			37	0	0	0	0	28.661	28.661	0		0			37
		38	0	0	0	0	4.768	4.768	-1.41		1.41			38	0	0	0	0	6.082	6.082	-2.745		2.745			38	0	0	0	0	12.607	-1.361		1.361			38	0	0	0	0	28.661	28.661	0		0			38
		39	0	0	0	0	6.178	6.178	-0.877		0.877			39	0	0	0	0	8.827	8.827	-1.007		1.007			39	0	0	0	0	13.968	-1.027		1.027			39	0	0	0	0	28.661	28.661	35.046					39
		40	0	0	0	0	7.055	7.055	-3.204		3.204			40	0	0	0	0	9.834	9.834	-1.198		1.198			40	0	0	0	0	14.995	-2.041		2.041			40	0	0	0	0	6.385	-6.385	-2.207		2.207			40
		41	0	0	0	0	10.259	10.259	0		0			41	0	0	0	0	11.032	11.032	-1.98		1.98			41	0	0	0	0	17.036	-1.824		1.824			41	0	0	0	0	4.178	-4.178	-4.584		4.584			41
		42	0	0	0	0	10.259	10.259	-2.376		2.376			42	0	0	0	0	13.012	13.012	-1.298		1.298			42	0	0	0	0	18.86	-1.961		1.961			42	0	0	0	0	0.406	0.406	-0.231		0.231			42
		43	0	0	0	0	12.635	12.635	-1.27		1.27			43	0	0	0	0	14.31	14.31	-1.493		1.493			43	0	0	0	0	20.821	-1.308		1.308			43	0	0	0	0	0.637	0.637	-2.066		2.066			43
		44	0	0	0	0	13.905	13.905	-1.133		1.133			44	0	0	0	0	15.803	15.803	-1.898		1.898			44	0	0	0	0	22.129	-2.063		2.063			44	0	0	0	0	2.703	2.703	-1.591		1.591			44
		45	0	0	0	0	15.038	15.038	-1.345		1.345			45	0	0	0	0	17.701	17.701	-1.602		1.602			45	0	0	0	0	24.192	-1.626		1.626			45	0	0	0	0	4.294	4.294	-2.677		2.677			45
		46	0	0	0	0	16.383	16.383	-1.444		1.444			46	0	0	0	0	19.303	19.303	0		0			46	0	0	0	0	25.818	-1.382		1.382			46	0	0	0	0	6.971	6.971	-1.481		1.481			46
		47	0	0	0	0	17.827	17.827	0		0			47	0	0	0	0	19.303	19.303	-1.728		1.728			47	0	0	0	0	27.2	0		0			47	0	0	0	0	8.452	8.452	-1.226		1.226			47
		48	0	0	0	0	17.827	17.827	0		0			48	0	0	0	0	21.031	21.031	-1.359		1.359			48	0	0	0	0	27.2	0		0			48	0	0	0	0	9.678	9.678	-3.65		3.65			48
		49	0	0	0	0	17.827	17.827	0		0			49	0	0	0	0	22.39	22.39	-0.398		0.398			49	0	0	0	0	27.2	0		0			49	0	0	0	0	13.328	13.328	-0.824		0.824			49
		50	0	0	0	0	17.827	17.827	-2.05		2.05			50	0	0	0	0	22.788	22.788	0		0			50	0	0	0	0	27.2	-2.193		2.193			50	0	0	0	0	14.152	14.152	-1.604		1.604			50
		51	0	0	0	0	19.877	19.877	-0.727		0.727			51	0	0	0	0	22.788	22.788	-1.629		1.629			51	0	0	0	0	29.393	0		0			51	0	0	0	0	15.756	15.756	-0.834		0.834			51
		52	0	0	0	0	20.604	20.604	29.042					52	0	0	0	0	24.417	24.417	-0.942		0.942			52	0	0	0	0	29.393	0		0			52	0	0	0	0	16.59	16.59	-1.458		1.458			52
		53	0	0	0	0	8.438	-8.438	0		0			53	0	0	0	0	25.359	25.359	0		0			53	0	0	0	0	29.393	13.371					53	0	0	0	0	18.048	18.048	0		0			53
		54	0	0	0	0	8.438	-8.438	-3.141		3.141			54	0	0	0	0	25.359	25.359	28.182					54	0	0	0	0	16.022	-2.526		2.526			54	0	0	0	0	18.048	18.048	-2.315		2.315			54
		55	0	0	0	0	5.297	-5.297	-1.152		1.152			55	0	0	0	0	2.823	-2.823	3.776					55	0	0	0	0	18.548	-0.337		0.337			55	0	0	0	0	20.363	20.363	-1.556		1.556			55
		56	0	0	0	0	4.145	-4.145	-4.734		4.734			56	0	0	0	0	6.599	-6.599	-3.13		3.13			56	0	0	0	0	18.885	-0.83		0.83			56	0	0	0	0	21.919	21.919	-1.535		1.535			56
		57	0	0	0	0	0.589	0.589	-1.523		1.523			57	0	0	0	0	3.469	-3.469	-5.058		5.058			57	0	0	0	0	19.715	-1.443		1.443			57	0	0	0	0	23.454	23.454	-1.054		1.054			57
		58	0	0	0	0	2.112	2.112	-0.923		0.923			58	0	0	0	0	1.589	1.589	-0.925		0.925			58	0	0	0	0	21.158	0		0			58	0	0	0	0	24.508	24.508	-1.595		1.595			58
		59	0	0	0	0	3.035	3.035	-1.53		1.53			59	0	0	0	0	2.514	2.514	-1.403		1.403			59	0	0	0	0	21.158	-1.259		1.259			59	0	0	0	0	26.103	26.103	-0.933		0.933			59
		60	0	0	0	0	4.565	4.565	-3.458		3.458			60	0	0	0	0	3.917	3.917	-1.621		1.621			60	0	0	0	0	22.417	0		0			60	0	0	0	0	27.036	27.036	0		0			60
		61	0	0	0	0	8.023	8.023	-1.091		1.091			61	0	0	0	0	5.538	5.538	-1.691		1.691			61	0	0	0	0	22.417	-1.312		1.312			61	0	0	0	0	27.036	27.036	-2.112		2.112			61
		62	0	0	0	0	9.114	9.114	0		0			62	0	0	0	0	7.229	7.229	-2.515		2.515			62	0	0	0	0	23.729	0		0			62	0	0	0	0	29.148	29.148	-1.317		1.317			62
		63	0	0	0	0	9.114	9.114	0		0			63	0	0	0	0	9.744	9.744	-1.278		1.278			63	0	0	0	0	23.729	0		0			63	0	0	0	0	30.465	30.465	39.759					63
		64	0	0	0	0	9.114	9.114	-2.515		2.515			64	0	0	0	0	11.022	11.022	-1.804		1.804			64	0	0	0	0	23.729	0		0			64	0	0	0	0	9.294	-9.294	0		0			64
		65	0	0	0	0	11.629	11.629	0		0			65	0	0	0	0	12.826	12.826	-2.197		2.197			65	0	0	0	0	23.729	0		0			65	0	0	0	0	9.294	-9.294	-2.512		2.512			65
		66	0	0	0	0	11.629	11.629	-2.003		2.003			66	0	0	0	0	15.023	15.023	-0.616		0.616			66	0	0	0	0	23.729	2.252					66	0	0	0	0	6.782	-6.782	-1.68		1.68			66
		67	0	0	0	0	13.632	13.632	-0.477		0.477			67	0	0	0	0	15.639	15.639	-1.564		1.564			67	0	0	0	0	21.477	0		0			67	0	0	0	0	5.102	-5.102	-1.57		1.57			67
		68	0	0	0	0	14.109	14.109	-1.638		1.638			68	0	0	0	0	17.203	17.203	-0.971		0.971			68	0	0	0	0	21.477	-2.046		2.046			68	0	0	0	0	3.532	-3.532	-2.086		2.086			68
		69	0	0	0	0	15.747	15.747	0		0			69	0	0	0	0	18.174	18.174	-1.612		1.612			69	0	0	0	0	23.523	0		0			69	0	0	0	0	1.446	-1.446	-1.554		1.554			69
		70	0	0	0	0	15.747	15.747	-1.523		1.523			70	0	0	0	0	19.786	19.786	-1.503		1.503			70	0	0	0	0	23.523	0		0			70	0	0	0	0	0.108	0.108	-3.682		3.682			70
		71	0	0	0	0	17.27	17.27	-1.273		1.273			71	0	0	0	0	21.289	21.289	-1.307		1.307			71	0	0	0	0	23.523	-1.696		1.696			71	0	0	0	0	3.79	3.79	-2.203		2.203			71
		72	0	0	0	0	18.543	18.543	-1.337		1.337			72	0	0	0	0	22.596	22.596	0		0			72	0	0	0	0	25.219	0		0			72	0	0	0	0	5.993	5.993	-1.512		1.512			72
		73	0	0	0	0	19.88	19.88	0		0			73	0	0	0	0	22.596	22.596	-2.262		2.262			73	0	0	0	0	25.219	0		0			73	0	0	0	0	7.505	7.505	-1.978		1.978			73
		74	0	0	0	0	19.88	19.88	29.213					74	0	0	0	0	24.858	24.858	0		0			74	0	0	0	0	25.219	0		0			74	0	0	0	0	9.483	9.483	-1.524		1.524			74
		75	0	0	0	0	9.333	-9.333	2.077					75	0	0	0	0	24.858	24.858	28.454					75	0	0	0	0	25.219	0		0			75	0	0	0	0	11.007	11.007	-1.383		1.383			75
		76	0	0	0	0	11.41	-11.41	-1.667		1.667			76	0	0	0	0	3.596	-3.596	0		0			76	0	0	0	0	25.219	0		0			76	0	0	0	0	12.39	12.39	-1.519		1.519			76
		77	0	0	0	0	9.743	-9.743	-2.738		2.738			77	0	0	0	0	3.596	-3.596	-3.792		3.792			77	0	0	0	0	25.219	2.812					77	0	0	0	0	13.909	13.909	-1.254		1.254			77
		78	0	0	0	0	7.005	-7.005	-1.451		1.451			78	0	0	0	0	0.196	0.196	0		0			78	0	0	0	0	22.407	0		0			78	0	0	0	0	15.163	15.163	-1.306		1.306			78
		79	0	0	0	0	5.554	-5.554	-0.899		0.899			79	0	0	0	0	0.196	0.196	-0.69		0.69			79	0	0	0	0	22.407	0		0			79	0	0	0	0	16.469	16.469	-2.027		2.027			79
		80	0	0	0	0	4.655	-4.655	-1.527		1.527			80	0	0	0	0	0.886	0.886	-3.278		3.278			80	0	0	0	0	22.407	-1.665		1.665			80	0	0	0	0	18.496	18.496	-1.233		1.233			80
		81	0	0	0	0	3.128	-3.128	-4.609		4.609			81	0	0	0	0	4.164	4.164	-1.723		1.723			81	0	0	0	0	24.072	0		0			81	0	0	0	0	19.729	19.729	-1.904		1.904			81
		82	0	0	0	0	1.481	1.481	0		0			82	0	0	0	0	5.887	5.887	-0.742		0.742			82	0	0	0	0	24.072	0		0			82	0	0	0	0	21.633	21.633	-0.715		0.715			82
		83	0	0	0	0	1.481	1.481	-3.83		3.83			83	0	0	0	0	6.629	6.629	-2.411		2.411			83	0	0	0	0	24.072	-1.864		1.864			83	0	0	0	0	22.348	22.348	-0.976		0.976			83
		84	0	0	0	0	5.311	5.311	-1.58		1.58			84	0	0	0	0	9.04	9.04	-3.097		3.097			84	0	0	0	0	25.936	0		0			84	0	0	0	0	23.324	23.324	-0.805		0.805			84
		85	0	0	0	0	6.891	6.891	-1.972		1.972			85	0	0	0	0	12.137	12.137	-1.612		1.612			85	0	0	0	0	25.936	0		0			85	0	0	0	0	24.129	24.129	-1.139		1.139			85
		86	0	0	0	0	8.863	8.863	0		0			86	0	0	0	0	13.749	13.749	0		0			86	0	0	0	0	25.936	-1.897		1.897			86	0	0	0	0	25.268	25.268	-0.638		0.638			86
		87	0	0	0	0	8.863	8.863	-1.037		1.037			87	0	0	0	0	13.749	13.749	-2.543		2.543			87	0	0	0	0	27.833	0		0			87	0	0	0	0	25.906	25.906	0		0			87
		88	0	0	0	0	9.9	9.9	-1.965		1.965			88	0	0	0	0	16.292	16.292	-0.906		0.906			88	0	0	0	0	27.833	0		0			88	0	0	0	0	25.906	25.906	-0.749		0.749			88
		89	0	0	0	0	11.865	11.865	0		0			89	0	0	0	0	17.198	17.198	0		0			89	0	0	0	0	27.833	0		0			89	0	0	0	0	26.655	26.655	0		0			89
		90	0	0	0	0	11.865	11.865	-1.845		1.845			90	0	0	0	0	17.198	17.198	-2.407		2.407			90	0	0	0	0	27.833	0		0			90	0	0	0	0	26.655	26.655	-1.276		1.276			90
		91	0	0	0	0	13.71	13.71	-1.223		1.223			91	0	0	0	0	19.605	19.605	-1.383		1.383			91	0	0	0	0	27.833	0		0			91	0	0	0	0	27.931	27.931	0		0			91
		92	0	0	0	0	14.933	14.933	-1.951		1.951			92	0	0	0	0	20.988	20.988	-0.837		0.837			92	0	0	0	0	27.833	0		0			92	0	0	0	0	27.931	27.931	33.457					92
		93	0	0	0	0	16.884	16.884	0		0			93	0	0	0	0	21.825	21.825	-0.763		0.763			93	0	0	0	0	27.833	7.966					93	0	0	0	0	5.526	-5.526	-1.637		1.637			93
		94	0	0	0	0	16.884	16.884	-1.203		1.203			94	0	0	0	0	22.588	22.588	0		0			94	0	0	0	0	19.867	0		0			94	0	0	0	0	3.889	-3.889	-2.147		2.147			94
		95	0	0	0	0	18.087	18.087	-1.061		1.061			95	0	0	0	0	22.588	22.588	-1.491		1.491			95	0	0	0	0	19.867	-2.889		2.889			95	0	0	0	0	1.742	-1.742	-2.187		2.187			95
		96	0	0	0	0	19.148	19.148	30.451					96	0	0	0	0	24.079	24.079	-1.428		1.428			96	0	0	0	0	22.756	0		0			96	0	0	0	0	0.445	0.445	-0.412		0.412			96
		97	0	0	0	0	11.303	-11.303	-2.239		2.239			97	0	0	0	0	25.507	25.507	0		0			97	0	0	0	0	22.756	-3.746		3.746			97	0	0	0	0	0.857	0.857	-3.344		3.344			97
		98	0	0	0	0	9.064	-9.064	-1.348		1.348			98	0	0	0	0	25.507	25.507	29.035					98	0	0	0	0	26.502	0		0			98	0	0	0	0	4.201	4.201	-1.444		1.444			98
		99	0	0	0	0	7.716	-7.716	-2.375		2.375			99	0	0	0	0	3.528	-3.528	-3.573		3.573			99	0	0	0	0	26.502	0		0			99	0	0	0	0	5.645	5.645	-0.808		0.808			99
		100	0	0	0	0	5.341	-5.341	0		0			100	0	0	0	0	0.045	0.045	-4.148		4.148			100	0	0	0	0	26.502	0		0			100	0	0	0	0	6.453	6.453	-1.467		1.467			100
		101	0	0	0	0	5.341	-5.341	-2.439		2.439			101	0	0	0	0	4.193	4.193	0		0			101	0	0	0	0	26.502	0		0			101	0	0	0	0	7.92	7.92	-3.105		3.105			101
		102	0	0	0	0	2.902	-2.902	-2.949		2.949			102	0	0	0	0	4.193	4.193	-2.045		2.045			102	0	0	0	0	26.502	-2.275		2.275			102	0	0	0	0	11.025	11.025	-1.7		1.7			102
		103	0	0	0	0	0.047	0.047	-1.605		1.605			103	0	0	0	0	6.238	6.238	-1.748		1.748			103	0	0	0	0	28.777	0		0			103	0	0	0	0	12.725	12.725	-2.119		2.119			103
		104	0	0	0	0	1.652	1.652	-1.883		1.883			104	0	0	0	0	7.986	7.986	-2.08		2.08			104	0	0	0	0	28.777	0		0			104	0	0	0	0	14.844	14.844	-1.748		1.748			104
		105	0	0	0	0	3.535	3.535	-1.839		1.839			105	0	0	0	0	10.066	10.066	-1.328		1.328			105	0	0	0	0	28.777	0		0			105	0	0	0	0	16.592	16.592	-1.608		1.608			105
		106	0	0	0	0	5.374	5.374	-1.738		1.738			106	0	0	0	0	11.394	11.394	-1.387		1.387			106	0	0	0	0	28.777	0		0			106	0	0	0	0	18.2	18.2	-0.84		0.84			106
		107	0	0	0	0	7.112	7.112	0		0			107	0	0	0	0	12.781	12.781	-1.613		1.613			107	0	0	0	0	28.777	0		0			107	0	0	0	0	19.04	19.04	-0.902		0.902			107
		108	0	0	0	0	7.112	7.112	-2.144		2.144			108	0	0	0	0	14.394	14.394	-1.887		1.887			108	0	0	0	0	28.777	14.476					108	0	0	0	0	19.942	19.942	-0.958		0.958			108
		109	0	0	0	0	9.256	9.256	-1.693		1.693			109	0	0	0	0	16.281	16.281	-2.592		2.592			109	0	0	0	0	14.301	0		0			109	0	0	0	0	20.9	20.9	-1.457		1.457			109
		110	0	0	0	0	10.949	10.949	0		0			110	0	0	0	0	18.873	18.873	0		0			110	0	0	0	0	14.301	-2.441		2.441			110	0	0	0	0	22.357	22.357	-1.26		1.26			110
		111	0	0	0	0	10.949	10.949	-1.838		1.838			111	0	0	0	0	18.873	18.873	-1.224		1.224			111	0	0	0	0	16.742	0		0			111	0	0	0	0	23.617	23.617	-1.313		1.313			111
		112	0	0	0	0	12.787	12.787	-1.213		1.213			112	0	0	0	0	20.097	20.097	-2.199		2.199			112	0	0	0	0	16.742	0		0			112	0	0	0	0	24.93	24.93	0		0			112
		113	0	0	0	0	14	14	-1.316		1.316			113	0	0	0	0	22.296	22.296	0		0			113	0	0	0	0	16.742	-0.634		0.634			113	0	0	0	0	24.93	24.93	0		0			113
		114	0	0	0	0	15.316	15.316	-1.219		1.219			114	0	0	0	0	22.296	22.296	-1.754		1.754			114	0	0	0	0	17.376	0		0			114	0	0	0	0	24.93	24.93	-1.525		1.525			114
		115	0	0	0	0	16.535	16.535	-0.853		0.853			115	0	0	0	0	24.05	24.05	0		0			115	0	0	0	0	17.376	0		0			115	0	0	0	0	26.455	26.455	-0.739		0.739			115
		116	0	0	0	0	17.388	17.388	-0.934		0.934			116	0	0	0	0	24.05	24.05	0		0			116	0	0	0	0	17.376	-2.447		2.447			116	0	0	0	0	27.194	27.194	0		0			116
		117	0	0	0	0	18.322	18.322	-1.562		1.562			117	0	0	0	0	24.05	24.05	27.947					117	0	0	0	0	19.823	0		0			117	0	0	0	0	27.194	27.194	-1.207		1.207			117
		118	0	0	0	0	19.884	19.884	0		0			118	0	0	0	0	3.897	-3.897	-1.597		1.597			118	0	0	0	0	19.823	0		0			118	0	0	0	0	28.401	28.401	-1.095		1.095			118
		119	0	0	0	0	19.884	19.884	-1.241		1.241			119	0	0	0	0	2.3	-2.3	-2.817		2.817			119	0	0	0	0	19.823	0		0			119	0	0	0	0	29.496	29.496	0		0			119
		120	0	0	0	0	21.125	21.125	0		0			120	0	0	0	0	0.517	0.517	-2.786		2.786			120	0	0	0	0	19.823	0		0			120	0	0	0	0	29.496	29.496	44.838					120
		121	0	0	0	0	21.125	21.125	0		0			121	0	0	0	0	3.303	3.303	-2.142		2.142			121	0	0	0	0	19.823	-2.184		2.184			121	0	0	0	0	15.342	-15.342	-5.019		5.019			121
		122	0	0	0	0	21.125	21.125	31.248					122	0	0	0	0	5.445	5.445	-1.815		1.815			122	0	0	0	0	22.007	0		0			122	0	0	0	0	10.323	-10.323	-2.198		2.198			122
		123	0	0	0	0	10.123	-10.123	-3.169		3.169			123	0	0	0	0	7.26	7.26	-1.135		1.135			123	0	0	0	0	22.007	-1.071		1.071			123	0	0	0	0	8.125	-8.125	-1.908		1.908			123
		124	0	0	0	0	6.954	-6.954	-2.665		2.665			124	0	0	0	0	8.395	8.395	-1.449		1.449			124	0	0	0	0	23.078	0		0			124	0	0	0	0	6.217	-6.217	-2.12		2.12			124
		125	0	0	0	0	4.289	-4.289	-1.515		1.515			125	0	0	0	0	9.844	9.844	-1.664		1.664			125	0	0	0	0	23.078	0		0			125	0	0	0	0	4.097	-4.097	-1.93		1.93			125
		126	0	0	0	0	2.774	-2.774	-2.979		2.979			126	0	0	0	0	11.508	11.508	0		0			126	0	0	0	0	23.078	0		0			126	0	0	0	0	2.167	-2.167	-2.642		2.642			126
		127	0	0	0	0	0.205	0.205	-4.729		4.729			127	0	0	0	0	11.508	11.508	-2.282		2.282			127	0	0	0	0	23.078	0		0			127	0	0	0	0	0.475	0.475	-1.681		1.681			127
		128	0	0	0	0	4.934	4.934	-0.875		0.875			128	0	0	0	0	13.79	13.79	-2.132		2.132			128	0	0	0	0	23.078	0		0			128	0	0	0	0	2.156	2.156	-3.183		3.183			128
		129	0	0	0	0	5.809	5.809	-2.074		2.074			129	0	0	0	0	15.922	15.922	-1.379		1.379			129	0	0	0	0	23.078	-1.284		1.284			129	0	0	0	0	5.339	5.339	-1.357		1.357			129
		130	0	0	0	0	7.883	7.883	-1.329		1.329			130	0	0	0	0	17.301	17.301	-1.898		1.898			130	0	0	0	0	24.362	0		0			130	0	0	0	0	6.696	6.696	-1.379		1.379			130
		131	0	0	0	0	9.212	9.212	-0.207		0.207			131	0	0	0	0	19.199	19.199	-1.107		1.107			131	0	0	0	0	24.362	0		0			131	0	0	0	0	8.075	8.075	-1.963		1.963			131
		132	0	0	0	0	9.419	9.419	0		0			132	0	0	0	0	20.306	20.306	0		0			132	0	0	0	0	24.362	0		0			132	0	0	0	0	10.038	10.038	-1.297		1.297			132
		133	0	0	0	0	9.419	9.419	-1.345		1.345			133	0	0	0	0	20.306	20.306	-0.755		0.755			133	0	0	0	0	24.362	0		0			133	0	0	0	0	11.335	11.335	-1.65		1.65			133
		134	0	0	0	0	10.764	10.764	-2.017		2.017			134	0	0	0	0	21.061	21.061	-1.801		1.801			134	0	0	0	0	24.362	0		0			134	0	0	0	0	12.985	12.985	-1.522		1.522			134
		135	0	0	0	0	12.781	12.781	-1.85		1.85			135	0	0	0	0	22.862	22.862	0		0			135	0	0	0	0	24.362	-1.726		1.726			135	0	0	0	0	14.507	14.507	-1.274		1.274			135
		136	0	0	0	0	14.631	14.631	-1.447		1.447			136	0	0	0	0	22.862	22.862	-1.742		1.742			136	0	0	0	0	26.088	0		0			136	0	0	0	0	15.781	15.781	-1.286		1.286			136
		137	0	0	0	0	16.078	16.078	0		0			137	0	0	0	0	24.604	24.604	0		0			137	0	0	0	0	26.088	0		0			137	0	0	0	0	17.067	17.067	-1.992		1.992			137
		138	0	0	0	0	16.078	16.078	-0.805		0.805			138	0	0	0	0	24.604	24.604	-2.265		2.265			138	0	0	0	0	26.088	0		0			138	0	0	0	0	19.059	19.059	-1.513		1.513			138
		139	0	0	0	0	16.883	16.883	0		0			139	0	0	0	0	26.869	26.869	0		0			139	0	0	0	0	26.088	-1.62		1.62			139	0	0	0	0	20.572	20.572	-1.96		1.96			139
		140	0	0	0	0	16.883	16.883	-2.383		2.383			140	0	0	0	0	26.869	26.869	0		0			140	0	0	0	0	27.708	0		0			140	0	0	0	0	22.532	22.532	-0.757		0.757			140
		141	0	0	0	0	19.266	19.266	0		0			141	0	0	0	0	26.869	26.869	-1.562		1.562			141	0	0	0	0	27.708	0		0			141	0	0	0	0	23.289	23.289	-1.614		1.614			141
		142	0	0	0	0	19.266	19.266	30.472					142	0	0	0	0	28.431	28.431	0		0			142	0	0	0	0	27.708	0		0			142	0	0	0	0	24.903	24.903	-1.398		1.398			142
		143	0	0	0	0	11.206	-11.206	-2.097		2.097			143	0	0	0	0	28.431	28.431	32.37					143	0	0	0	0	27.708	0		0			143	0	0	0	0	26.301	26.301	-1.336		1.336			143
		144	0	0	0	0	9.109	-9.109	-1.139		1.139			144	0	0	0	0	3.939	-3.939	-2.279		2.279			144	0	0	0	0	27.708	0		0			144	0	0	0	0	27.637	27.637	0		0			144
		145	0	0	0	0	7.97	-7.97	-3.183		3.183			145	0	0	0	0	1.66	-1.66	-2.447		2.447			145	0	0	0	0	27.708	0		0			145	0	0	0	0	27.637	27.637	-1.079		1.079			145
		146	0	0	0	0	4.787	-4.787	-1.863		1.863			146	0	0	0	0	0.787	0.787	-1.65		1.65			146	0	0	0	0	27.708	0		0			146	0	0	0	0	28.716	28.716	0		0			146
		147	0	0	0	0	2.924	-2.924	-1.111		1.111			147	0	0	0	0	2.437	2.437	-2.526		2.526			147	0	0	0	0	27.708	0		0			147	0	0	0	0	28.716	28.716	-1.393		1.393			147
		148	0	0	0	0	1.813	-1.813	-2.159		2.159			148	0	0	0	0	4.963	4.963	-3.276		3.276			148	0	0	0	0	27.708	0		0			148	0	0	0	0	30.109	30.109	0		0			148
		149	0	0	0	0	0.346	0.346	-1.409		1.409			149	0	0	0	0	8.239	8.239	-1.093		1.093			149	0	0	0	0	27.708	0		0			149	0	0	0	0	30.109	30.109	0		0			149
		150	0	0	0	0	1.755	1.755	-2.456		2.456			150	0	0	0	0	9.332	9.332	-1.727		1.727			150	0	0	0	0	27.708	0		0			150	0	0	0	0	30.109	30.109	-2.497		2.497			150
		151	0	0	0	0	4.211	4.211	-1.58		1.58			151	0	0	0	0	11.059	11.059	-1.699		1.699			151	0	0	0	0	27.708	0		0			151	0	0	0	0	32.606	32.606	0		0			151
		152	0	0	0	0	5.791	5.791	0		0			152	0	0	0	0	12.758	12.758	-1.84		1.84			152	0	0	0	0	27.708	0		0			152	0	0	0	0	32.606	32.606	0		0			152
		153	0	0	0	0	5.791	5.791	-3.097		3.097			153	0	0	0	0	14.598	14.598	-1.384		1.384			153	0	0	0	0	27.708	0		0			153	0	0	0	0	32.606	32.606	34.416					153
		154	0	0	0	0	8.888	8.888	-1.101		1.101			154	0	0	0	0	15.982	15.982	-1.745		1.745			154	0	0	0	0	27.708	0		0			154	0	0	0	0	1.81	-1.81	-1.815		1.815			154
		155	0	0	0	0	9.989	9.989	-1.467		1.467			155	0	0	0	0	17.727	17.727	0		0			155	0	0	0	0	27.708	0		0			155	0	0	0	0	0.005	0.005	-3.052		3.052			155
		156	0	0	0	0	11.456	11.456	-1.227		1.227			156	0	0	0	0	17.727	17.727	-1.355		1.355			156	0	0	0	0	27.708	-1.223		1.223			156	0	0	0	0	3.057	3.057	-2.094		2.094			156
		157	0	0	0	0	12.683	12.683	-1.152		1.152			157	0	0	0	0	19.082	19.082	-1.671		1.671			157	0	0	0	0	28.931	0		0			157	0	0	0	0	5.151	5.151	-1.619		1.619			157
		158	0	0	0	0	13.835	13.835	-1.398		1.398			158	0	0	0	0	20.753	20.753	-1.407		1.407			158	0	0	0	0	28.931	0		0			158	0	0	0	0	6.77	6.77	-1.991		1.991			158
		159	0	0	0	0	15.233	15.233	0		0			159	0	0	0	0	22.16	22.16	-0.95		0.95			159	0	0	0	0	28.931	0		0			159	0	0	0	0	8.761	8.761	-2.689		2.689			159
		160	0	0	0	0	15.233	15.233	-0.98		0.98			160	0	0	0	0	23.11	23.11	0		0			160	0	0	0	0	28.931	0		0			160	0	0	0	0	11.45	11.45	-2.079		2.079			160
		161	0	0	0	0	16.213	16.213	-1.766		1.766			161	0	0	0	0	23.11	23.11	-2.498		2.498			161	0	0	0	0	28.931	0		0			161	0	0	0	0	13.529	13.529	-1.591		1.591			161
		162	0	0	0	0	17.979	17.979	0		0			162	0	0	0	0	25.608	25.608	-1.706		1.706			162	0	0	0	0	28.931	0		0			162	0	0	0	0	15.12	15.12	-1.67		1.67			162
		163	0	0	0	0	17.979	17.979	0		0			163	0	0	0	0	27.314	27.314	0		0			163	0	0	0	0	28.931	0		0			163	0	0	0	0	16.79	16.79	-1.129		1.129			163
		164	0	0	0	0	17.979	17.979	-1.801		1.801			164	0	0	0	0	27.314	27.314	-1.234		1.234			164	0	0	0	0	28.931	0		0			164	0	0	0	0	17.919	17.919	-2.025		2.025			164
		165	0	0	0	0	19.78	19.78	0		0			165	0	0	0	0	28.548	28.548	0		0			165	0	0	0	0	28.931	0		0			165	0	0	0	0	19.944	19.944	-0.572		0.572			165
		166	0	0	0	0	19.78	19.78	25.772					166	0	0	0	0	28.548	28.548	0		0			166	0	0	0	0	28.931	0		0			166	0	0	0	0	20.516	20.516	-2.27		2.27			166
		167	0	0	0	0	5.992	-5.992	0		0			167	0	0	0	0	28.548	28.548	31.408					167	0	0	0	0	28.931	0		0			167	0	0	0	0	22.786	22.786	-1.449		1.449			167
		168	0	0	0	0	5.992	-5.992	0		0			168	0	0	0	0	2.86	-2.86	0		0			168	0	0	0	0	28.931	0		0			168	0	0	0	0	24.235	24.235	-0.757		0.757			168
		169	0	0	0	0	5.992	-5.992	-2.353		2.353			169	0	0	0	0	2.86	-2.86	-3.799		3.799			169	0	0	0	0	28.931	0		0			169	0	0	0	0	24.992	24.992	0		0			169
		170	0	0	0	0	3.639	-3.639	-3.763		3.763			170	0	0	0	0	0.939	0.939	-1.761		1.761			170	0	0	0	0	28.931	0		0			170	0	0	0	0	24.992	24.992	-0.984		0.984			170
		171	0	0	0	0	0.124	0.124	-2.362		2.362			171	0	0	0	0	2.7	2.7	-2.685		2.685			171	0	0	0	0	28.931	0		0			171	0	0	0	0	25.976	25.976	-0.151		0.151			171
		172	0	0	0	0	2.486	2.486	-2.289		2.289			172	0	0	0	0	5.385	5.385	-3.14		3.14			172	0	0	0	0	28.931	0		0			172	0	0	0	0	26.127	26.127	-0.754		0.754			172
		173	0	0	0	0	4.775	4.775	-3.987		3.987			173	0	0	0	0	8.525	8.525	-1.977		1.977			173	0	0	0	0	28.931	0		0			173	0	0	0	0	26.881	26.881	0		0			173
		174	0	0	0	0	8.762	8.762	-0.934		0.934			174	0	0	0	0	10.502	10.502	-1.337		1.337			174	0	0	0	0	28.931	0		0			174	0	0	0	0	26.881	26.881	-1.838		1.838			174
		175	0	0	0	0	9.696	9.696	0		0			175	0	0	0	0	11.839	11.839	-1.196		1.196			175	0	0	0	0	28.931	0		0			175	0	0	0	0	28.719	28.719	0		0			175
		176	0	0	0	0	9.696	9.696	-2.035		2.035			176	0	0	0	0	13.035	13.035	-0.995		0.995			176	0	0	0	0	28.931	0		0			176	0	0	0	0	28.719	28.719	0		0			176
		177	0	0	0	0	11.731	11.731	0		0			177	0	0	0	0	14.03	14.03	-2.45		2.45			177	0	0	0	0	28.931	0		0			177	0	0	0	0	28.719	28.719	0		0			177
		178	0	0	0	0	11.731	11.731	-1.961		1.961			178	0	0	0	0	16.48	16.48	-1.298		1.298			178	0	0	0	0	28.931	0		0			178	0	0	0	0	28.719	28.719	0		0			178
		179	0	0	0	0	13.692	13.692	-1.517		1.517			179	0	0	0	0	17.778	17.778	0		0			179	0	0	0	0	28.931	0		0			179	0	0	0	0	28.719	28.719	0		0			179
		180	0	0	0	0	15.209	15.209	-1.267		1.267			180	0	0	0	0	17.778	17.778	-1.088		1.088			180	0	0	0	0	28.931	0		0			180	0	0	0	0	28.719	28.719	-1.61		1.61			180
		181	0	0	0	0	16.476	16.476	0		0			181	0	0	0	0	18.866	18.866	-1.068		1.068			181	0	0	0	0	28.931	0		0			181	0	0	0	0	30.329	30.329	0		0			181
		182	0	0	0	0	16.476	16.476	-1.82		1.82			182	0	0	0	0	19.934	19.934	-1.797		1.797			182	0	0	0	0	28.931	0		0			182	0	0	0	0	30.329	30.329	0		0			182
		183	0	0	0	0	18.296	18.296						183	0	0	0	0	21.731	21.731						183	0	0	0	0	28.931						183	0	0	0	0	30.329	30.329						183
[truncated: 117 more columns]

## Sheet: Hoja5
	Trial#2 - 10dpt
	(PC-ablated)
	4 frames per second
		Tam 10dpt	ser35					degrees rot	# saccades	speed rotat	speed average		Tam 10dpt	ser33					degrees rot	# saccades	speed rotat	speed average		Tam 10dpt	ser31						degrees rot	# saccades	speed rotat	speed average		Tam 10dpt	ser29						degrees rot	# saccades	speed rotat	speed average		Tam 10dpt	ser26
		1	0	0	0	0	32.415	-1.243	8	1.243	1.27086		1	0	0	0	0	31.912	-1.773	1	1.773	0.5816		1	0	0	0	0	10.117	10.117	-2.362	6	2.362	1.43106		1	0	0	0	0	12.55	12.55	-5.043	6	5.043	1.14081		1	0
		2	0	0	0	0	33.658	33.555					2	0	0	0	0	33.685	3.808					2	0	0	0	0	12.479	12.479	-1.913		1.913			2	0	0	0	0	17.593	17.593	0		0			2	0
		3	0	0	0	0	0.103	-2.555		2.555			3	0	0	0	0	29.877	0		0			3	0	0	0	0	14.392	14.392	-0.756		0.756			3	0	0	0	0	17.593	17.593	0		0			3	0
		4	0	0	0	0	2.658	-2.016		2.016			4	0	0	0	0	29.877	2.915					4	0	0	0	0	15.148	15.148	-1.706		1.706			4	0	0	0	0	17.593	17.593	-2.52		2.52			4	0
		5	0	0	0	0	4.674	-2.702		2.702			5	0	0	0	0	26.962	-1.633		1.633			5	0	0	0	0	16.854	16.854	-3.043		3.043			5	0	0	0	0	20.113	20.113	0		0			5	0
		6	0	0	0	0	7.376	-1.118		1.118			6	0	0	0	0	28.595	-1.534		1.534			6	0	0	0	0	19.897	19.897	-1.948		1.948			6	0	0	0	0	20.113	20.113	0		0			6	0
		7	0	0	0	0	8.494	-1.747		1.747			7	0	0	0	0	30.129	-1.087		1.087			7	0	0	0	0	21.845	21.845	-0.904		0.904			7	0	0	0	0	20.113	20.113	0		0			7	0
		8	0	0	0	0	10.241	-0.424		0.424			8	0	0	0	0	31.216	-0.737		0.737			8	0	0	0	0	22.749	22.749	-3.087		3.087			8	0	0	0	0	20.113	20.113	10.564					8	0
		9	0	0	0	0	10.665	-3.307		3.307			9	0	0	0	0	31.953	0		0			9	0	0	0	0	25.836	25.836	-1.166		1.166			9	0	0	0	0	9.549	9.549	-2.064		2.064			9	0
		10	0	0	0	0	13.972	-2.202		2.202			10	0	0	0	0	31.953	0		0			10	0	0	0	0	27.002	27.002	-1.472		1.472			10	0	0	0	0	11.613	11.613	0		0			10	0
		11	0	0	0	0	16.174	-2.2		2.2			11	0	0	0	0	31.953	1.508					11	0	0	0	0	28.474	28.474	-2.035		2.035			11	0	0	0	0	11.613	11.613	-1.404		1.404			11	0
		12	0	0	0	0	18.374	-1.433		1.433			12	0	0	0	0	30.445	0		0			12	0	0	0	0	30.509	30.509	-1.572		1.572			12	0	0	0	0	13.017	13.017	0		0			12	0
		13	0	0	0	0	19.807	-1.803		1.803			13	0	0	0	0	30.445	0		0			13	0	0	0	0	32.081	32.081	-2.216		2.216			13	0	0	0	0	13.017	13.017	-2.015		2.015			13	0
		14	0	0	0	0	21.61	-1.595		1.595			14	0	0	0	0	30.445	1.637					14	0	0	0	0	34.297	34.297	-0.055		0.055			14	0	0	0	0	15.032	15.032	0		0			14	0
		15	0	0	0	0	23.205	-1.737		1.737			15	0	0	0	0	28.808	0		0			15	0	0	0	0	34.352	34.352	41.907					15	0	0	0	0	15.032	15.032	-1.031		1.031			15	0
		16	0	0	0	0	24.942	-1.92		1.92			16	0	0	0	0	28.808	0		0			16	0	0	0	0	7.555	-7.555	0		0			16	0	0	0	0	16.063	16.063	-0.797		0.797			16	0
		17	0	0	0	0	26.862	-1.357		1.357			17	0	0	0	0	28.808	-1.896		1.896			17	0	0	0	0	7.555	-7.555	0		0			17	0	0	0	0	16.86	16.86	0		0			17	0
		18	0	0	0	0	28.219	-2.604		2.604			18	0	0	0	0	30.704	0		0			18	0	0	0	0	7.555	-7.555	-11.977		11.977			18	0	0	0	0	16.86	16.86	-1.789		1.789			18	0
		19	0	0	0	0	30.823	-1.55		1.55			19	0	0	0	0	30.704	0.008					19	0	0	0	0	4.422	4.422	-3.045		3.045			19	0	0	0	0	18.649	18.649	0		0			19	0
		20	0	0	0	0	32.373	0		0			20	0	0	0	0	30.696	-0.925		0.925			20	0	0	0	0	7.467	7.467	0		0			20	0	0	0	0	18.649	18.649	-1.138		1.138			20	0
		21	0	0	0	0	32.373	-1.945		1.945			21	0	0	0	0	31.621	-2.154		2.154			21	0	0	0	0	7.467	7.467	-2.692		2.692			21	0	0	0	0	19.787	19.787	0		0			21	0
		22	0	0	0	0	34.318	0		0			22	0	0	0	0	33.775	0		0			22	0	0	0	0	10.159	10.159	-2.037		2.037			22	0	0	0	0	19.787	19.787	-1.71		1.71			22	0
		23	0	0	0	0	34.318	-2.146		2.146			23	0	0	0	0	33.775	0		0			23	0	0	0	0	12.196	12.196	-1.147		1.147			23	0	0	0	0	21.497	21.497	-1.024		1.024			23	0
		24	0	0	0	0	36.464	0		0			24	0	0	0	0	33.775	-1.239		1.239			24	0	0	0	0	13.343	13.343	-3.033		3.033			24	0	0	0	0	22.521	22.521	0		0			24	0
		25	0	0	0	0	36.464	22.307					25	0	0	0	0	35.014	0		0			25	0	0	0	0	16.376	16.376	-1.069		1.069			25	0	0	0	0	22.521	22.521	0		0			25	0
		26	0	0	0	0	14.157	-4.761		4.761			26	0	0	0	0	35.014	0		0			26	0	0	0	0	17.445	17.445	-1.897		1.897			26	0	0	0	0	22.521	22.521	0		0			26	0
		27	0	0	0	0	18.918	-2.16		2.16			27	0	0	0	0	35.014	0		0			27	0	0	0	0	19.342	19.342	-1.687		1.687			27	0	0	0	0	22.521	22.521	-1.119		1.119			27	0
		28	0	0	0	0	21.078	-2.181		2.181			28	0	0	0	0	35.014	5.214					28	0	0	0	0	21.029	21.029	-1.029		1.029			28	0	0	0	0	23.64	23.64	0		0			28	0
		29	0	0	0	0	23.259	-1.947		1.947			29	0	0	0	0	29.8	-1.9		1.9			29	0	0	0	0	22.058	22.058	-1.752		1.752			29	0	0	0	0	23.64	23.64	0		0			29	0
		30	0	0	0	0	25.206	-2.475		2.475			30	0	0	0	0	31.7	-0.785		0.785			30	0	0	0	0	23.81	23.81	-1.88		1.88			30	0	0	0	0	23.64	23.64	-1.335		1.335			30	0
		31	0	0	0	0	27.681	-1.568		1.568			31	0	0	0	0	32.485	0		0			31	0	0	0	0	25.69	25.69	0		0			31	0	0	0	0	24.975	24.975	-1.383		1.383			31	0
		32	0	0	0	0	29.249	-1.224		1.224			32	0	0	0	0	32.485	0		0			32	0	0	0	0	25.69	25.69	-2.258		2.258			32	0	0	0	0	26.358	26.358	0		0			32	0
		33	0	0	0	0	30.473	-1.451		1.451			33	0	0	0	0	32.485	-1.01		1.01			33	0	0	0	0	27.948	27.948	0		0			33	0	0	0	0	26.358	26.358	-1.232		1.232			33	0
		34	0	0	0	0	31.924	0		0			34	0	0	0	0	33.495	0		0			34	0	0	0	0	27.948	27.948	-1.455		1.455			34	0	0	0	0	27.59	27.59	20.76					34	0
		35	0	0	0	0	31.924	0		0			35	0	0	0	0	33.495	5.137					35	0	0	0	0	29.403	29.403	-1.957		1.957			35	0	0	0	0	6.83	6.83	-2.032		2.032			35	0
		36	0	0	0	0	31.924	0		0			36	0	0	0	0	28.358	-1.803		1.803			36	0	0	0	0	31.36	31.36	-0.78		0.78			36	0	0	0	0	8.862	8.862	-1.232		1.232			36	0
		37	0	0	0	0	31.924	-3.497		3.497			37	0	0	0	0	30.161	-1.874		1.874			37	0	0	0	0	32.14	32.14	-0.693		0.693			37	0	0	0	0	10.094	10.094	-1.422		1.422			37	0
		38	0	0	0	0	35.421	33.531					38	0	0	0	0	32.035	7.513					38	0	0	0	0	32.833	32.833	0		0			38	0	0	0	0	11.516	11.516	-1.966		1.966			38	0
		39	0	0	0	0	1.89	0		0			39	0	0	0	0	24.522	0		0			39	0	0	0	0	32.833	32.833	-2.309		2.309			39	0	0	0	0	13.482	13.482	-1.611		1.611			39	0
		40	0	0	0	0	1.89	-2.102		2.102			40	0	0	0	0	24.522	0		0			40	0	0	0	0	35.142	35.142	0		0			40	0	0	0	0	15.093	15.093	-1.33		1.33			40	0
		41	0	0	0	0	3.992	-3.338		3.338			41	0	0	0	0	24.522	-8.604		8.604			41	0	0	0	0	35.142	35.142	38.728					41	0	0	0	0	16.423	16.423	-1.365		1.365			41	0
		42	0	0	0	0	7.33	-1.196		1.196			42	0	0	0	0	33.126	-1.565		1.565			42	0	0	0	0	3.586	-3.586	-3.928		3.928			42	0	0	0	0	17.788	17.788	-1.024		1.024			42	0
		43	0	0	0	0	8.526	-2.854		2.854			43	0	0	0	0	34.691	0		0			43	0	0	0	0	0.342	0.342	-0.347		0.347			43	0	0	0	0	18.812	18.812	-0.857		0.857			43	0
		44	0	0	0	0	11.38	-1.262		1.262			44	0	0	0	0	34.691	-0.974		0.974			44	0	0	0	0	0.689	0.689	-4.093		4.093			44	0	0	0	0	19.669	19.669	-1.8		1.8			44	0
		45	0	0	0	0	12.642	-1.562		1.562			45	0	0	0	0	35.665	0		0			45	0	0	0	0	4.782	4.782	-2.696		2.696			45	0	0	0	0	21.469	21.469	-0.989		0.989			45	0
		46	0	0	0	0	14.204	-0.983		0.983			46	0	0	0	0	35.665	4.564					46	0	0	0	0	7.478	7.478	-2.514		2.514			46	0	0	0	0	22.458	22.458	-0.887		0.887			46	0
		47	0	0	0	0	15.187	-1.651		1.651			47	0	0	0	0	31.101	0		0			47	0	0	0	0	9.992	9.992	-2.174		2.174			47	0	0	0	0	23.345	23.345	-1.612		1.612			47	0
		48	0	0	0	0	16.838	-1.93		1.93			48	0	0	0	0	31.101	0		0			48	0	0	0	0	12.166	12.166	-2.539		2.539			48	0	0	0	0	24.957	24.957	0		0			48	0
		49	0	0	0	0	18.768	-0.25		0.25			49	0	0	0	0	31.101	-3.412		3.412			49	0	0	0	0	14.705	14.705	-1.724		1.724			49	0	0	0	0	24.957	24.957	0		0			49	0
		50	0	0	0	0	19.018	-2.22		2.22			50	0	0	0	0	34.513	0		0			50	0	0	0	0	16.429	16.429	-1.463		1.463			50	0	0	0	0	24.957	24.957	-1.879		1.879			50	0
		51	0	0	0	0	21.238	-1.884		1.884			51	0	0	0	0	34.513	0		0			51	0	0	0	0	17.892	17.892	-2.012		2.012			51	0	0	0	0	26.836	26.836	-0.855		0.855			51	0
		52	0	0	0	0	23.122	-1.155		1.155			52	0	0	0	0	34.513	0		0			52	0	0	0	0	19.904	19.904	-1.33		1.33			52	0	0	0	0	27.691	27.691	0		0			52	0
		53	0	0	0	0	24.277	-1.615		1.615			53	0	0	0	0	34.513	0		0			53	0	0	0	0	21.234	21.234	-1.227		1.227			53	0	0	0	0	27.691	27.691	0		0			53	0
		54	0	0	0	0	25.892	-1.26		1.26			54	0	0	0	0	34.513	0		0			54	0	0	0	0	22.461	22.461	-1.566		1.566			54	0	0	0	0	27.691	27.691	-1.545		1.545			54	0
		55	0	0	0	0	27.152	0		0			55	0	0	0	0	34.513	-1.631		1.631			55	0	0	0	0	24.027	24.027	-1.454		1.454			55	0	0	0	0	29.236	29.236	32.087					55	0
		56	0	0	0	0	27.152	-1.178		1.178			56	0	0	0	0	36.144	0		0			56	0	0	0	0	25.481	25.481	-1.067		1.067			56	0	0	0	0	2.851	-2.851	-0.877		0.877			56	0
		57	0	0	0	0	28.33	-0.967		0.967			57	0	0	0	0	36.144	0		0			57	0	0	0	0	26.548	26.548	-1.875		1.875			57	0	0	0	0	1.974	-1.974	-4.389		4.389			57	0
		58	0	0	0	0	29.297	0		0			58	0	0	0	0	36.144	0		0			58	0	0	0	0	28.423	28.423	0		0			58	0	0	0	0	2.415	2.415	-2.252		2.252			58	0
		59	0	0	0	0	29.297	-1.725		1.725			59	0	0	0	0	36.144	5.541					59	0	0	0	0	28.423	28.423	0		0			59	0	0	0	0	4.667	4.667	-2.106		2.106			59	0
		60	0	0	0	0	31.022	0		0			60	0	0	0	0	30.603	-1.864		1.864			60	0	0	0	0	28.423	28.423	-2.605		2.605			60	0	0	0	0	6.773	6.773	-3.002		3.002			60	0
		61	0	0	0	0	31.022	-1.188		1.188			61	0	0	0	0	32.467	0		0			61	0	0	0	0	31.028	31.028	0		0			61	0	0	0	0	9.775	9.775	-1.609		1.609			61	0
		62	0	0	0	0	32.21	-2.071		2.071			62	0	0	0	0	32.467	-1.072		1.072			62	0	0	0	0	31.028	31.028	-3.183		3.183			62	0	0	0	0	11.384	11.384	-2.488		2.488			62	0
		63	0	0	0	0	34.281	-1.08		1.08			63	0	0	0	0	33.539	0		0			63	0	0	0	0	34.211	34.211	0		0			63	0	0	0	0	13.872	13.872	-0.337		0.337			63	0
		64	0	0	0	0	35.361	0		0			64	0	0	0	0	33.539	0		0			64	0	0	0	0	34.211	34.211	0		0			64	0	0	0	0	14.209	14.209	-2.333		2.333			64	0
		65	0	0	0	0	35.361	0		0			65	0	0	0	0	33.539	0		0			65	0	0	0	0	34.211	34.211	0		0			65	0	0	0	0	16.542	16.542	-2.237		2.237			65	0
		66	0	0	0	0	35.361	0		0			66	0	0	0	0	33.539	-1.273		1.273			66	0	0	0	0	34.211	34.211	0		0			66	0	0	0	0	18.779	18.779	-1.342		1.342			66	0
		67	0	0	0	0	35.361	0		0			67	0	0	0	0	34.812	0		0			67	0	0	0	0	34.211	34.211	40.167					67	0	0	0	0	20.121	20.121	-1.809		1.809			67	0
		68	0	0	0	0	35.361	0		0			68	0	0	0	0	34.812	0		0			68	0	0	0	0	5.956	-5.956	0		0			68	0	0	0	0	21.93	21.93	0		0			68	0
		69	0	0	0	0	35.361	0		0			69	0	0	0	0	34.812	3.262					69	0	0	0	0	5.956	-5.956	-9.03		9.03			69	0	0	0	0	21.93	21.93	0		0			69	0
		70	0	0	0	0	35.361	35.15					70	0	0	0	0	31.55	-2.913		2.913			70	0	0	0	0	3.074	3.074	-2.237		2.237			70	0	0	0	0	21.93	21.93	-1.712		1.712			70	0
		71	0	0	0	0	0.211	-1.23		1.23			71	0	0	0	0	34.463	0		0			71	0	0	0	0	5.311	5.311	-1.157		1.157			71	0	0	0	0	23.642	23.642	0		0			71	0
		72	0	0	0	0	1.441	-3.201		3.201			72	0	0	0	0	34.463	0		0			72	0	0	0	0	6.468	6.468	-1.951		1.951			72	0	0	0	0	23.642	23.642	-1.59		1.59			72	0
		73	0	0	0	0	4.642	-2.619		2.619			73	0	0	0	0	34.463	0		0			73	0	0	0	0	8.419	8.419	-1.135		1.135			73	0	0	0	0	25.232	25.232	0		0			73	0
		74	0	0	0	0	7.261	-1.779		1.779			74	0	0	0	0	34.463	5.086					74	0	0	0	0	9.554	9.554	-2.497		2.497			74	0	0	0	0	25.232	25.232	-2.027		2.027			74	0
		75	0	0	0	0	9.04	-1.891		1.891			75	0	0	0	0	29.377	0		0			75	0	0	0	0	12.051	12.051	-1.265		1.265			75	0	0	0	0	27.259	27.259	0		0			75	0
		76	0	0	0	0	10.931	-2.913		2.913			76	0	0	0	0	29.377	11.48					76	0	0	0	0	13.316	13.316	-0.792		0.792			76	0	0	0	0	27.259	27.259	0		0			76	0
		77	0	0	0	0	13.844	-0.039		0.039			77	0	0	0	0	17.897	-3.045		3.045			77	0	0	0	0	14.108	14.108	-2.784		2.784			77	0	0	0	0	27.259	27.259	-2.633		2.633			77	0
		78	0	0	0	0	13.883	-1.5		1.5			78	0	0	0	0	20.942	-0.843		0.843			78	0	0	0	0	16.892	16.892	-0.75		0.75			78	0	0	0	0	29.892	29.892	34.918					78	0
		79	0	0	0	0	15.383	-1.453		1.453			79	0	0	0	0	21.785	0		0			79	0	0	0	0	17.642	17.642	-2.064		2.064			79	0	0	0	0	5.026	-5.026	-1.762		1.762			79	0
		80	0	0	0	0	16.836	-1.918		1.918			80	0	0	0	0	21.785	-1.945		1.945			80	0	0	0	0	19.706	19.706	0		0			80	0	0	0	0	3.264	-3.264	-3.935		3.935			80	0
		81	0	0	0	0	18.754	-1.146		1.146			81	0	0	0	0	23.73	0		0			81	0	0	0	0	19.706	19.706	-1.861		1.861			81	0	0	0	0	0.671	0.671	-1.256		1.256			81	0
		82	0	0	0	0	19.9	-1.221		1.221			82	0	0	0	0	23.73	-1.982		1.982			82	0	0	0	0	21.567	21.567	-1.304		1.304			82	0	0	0	0	1.927	1.927	-2.561		2.561			82	0
		83	0	0	0	0	21.121	-1.236		1.236			83	0	0	0	0	25.712	0		0			83	0	0	0	0	22.871	22.871	0		0			83	0	0	0	0	4.488	4.488	-4.209		4.209			83	0
		84	0	0	0	0	22.357	-2.781		2.781			84	0	0	0	0	25.712	-1.4		1.4			84	0	0	0	0	22.871	22.871	-3.39		3.39			84	0	0	0	0	8.697	8.697	-2.039		2.039			84	0
		85	0	0	0	0	25.138	-1.283		1.283			85	0	0	0	0	27.112	-2.524		2.524			85	0	0	0	0	26.261	26.261	0		0			85	0	0	0	0	10.736	10.736	-1.635		1.635			85	0
		86	0	0	0	0	26.421	0		0			86	0	0	0	0	29.636	0		0			86	0	0	0	0	26.261	26.261	-1.331		1.331			86	0	0	0	0	12.371	12.371	-0.27		0.27			86	0
		87	0	0	0	0	26.421	0		0			87	0	0	0	0	29.636	0		0			87	0	0	0	0	27.592	27.592	-1.664		1.664			87	0	0	0	0	12.641	12.641	-1.312		1.312			87	0
		88	0	0	0	0	26.421	0		0			88	0	0	0	0	29.636	0		0			88	0	0	0	0	29.256	29.256	0		0			88	0	0	0	0	13.953	13.953	-1.725		1.725			88	0
		89	0	0	0	0	26.421	-0.595		0.595			89	0	0	0	0	29.636	0		0			89	0	0	0	0	29.256	29.256	-2.404		2.404			89	0	0	0	0	15.678	15.678	-2.43		2.43			89	0
		90	0	0	0	0	27.016	-2.775		2.775			90	0	0	0	0	29.636	0		0			90	0	0	0	0	31.66	31.66	0		0			90	0	0	0	0	18.108	18.108	0		0			90	0
		91	0	0	0	0	29.791	0		0			91	0	0	0	0	29.636	0		0			91	0	0	0	0	31.66	31.66	-0.57		0.57			91	0	0	0	0	18.108	18.108	-2.107		2.107			91	0
		92	0	0	0	0	29.791	29.61					92	0	0	0	0	29.636	-2.031		2.031			92	0	0	0	0	32.23	32.23	0		0			92	0	0	0	0	20.215	20.215	-1.843		1.843			92	0
		93	0	0	0	0	0.181	-2.986		2.986			93	0	0	0	0	31.667	0		0			93	0	0	0	0	32.23	32.23	-1.343		1.343			93	0	0	0	0	22.058	22.058	0		0			93	0
		94	0	0	0	0	3.167	-2.656		2.656			94	0	0	0	0	31.667	-1.872		1.872			94	0	0	0	0	33.573	33.573	0		0			94	0	0	0	0	22.058	22.058	-2.728		2.728			94	0
		95	0	0	0	0	5.823	-3.192		3.192			95	0	0	0	0	33.539	0		0			95	0	0	0	0	33.573	33.573	0		0			95	0	0	0	0	24.786	24.786	0		0			95	0
		96	0	0	0	0	9.015	-1.173		1.173			96	0	0	0	0	33.539	0		0			96	0	0	0	0	33.573	33.573	-1.848		1.848			96	0	0	0	0	24.786	24.786	0		0			96	0
		97	0	0	0	0	10.188	-1.481		1.481			97	0	0	0	0	33.539	-1.12		1.12			97	0	0	0	0	35.421	35.421	0		0			97	0	0	0	0	24.786	24.786	-1.591		1.591			97	0
		98	0	0	0	0	11.669	-0.973		0.973			98	0	0	0	0	34.659	0		0			98	0	0	0	0	35.421	35.421	0		0			98	0	0	0	0	26.377	26.377	0		0			98	0
		99	0	0	0	0	12.642	-2.858		2.858			99	0	0	0	0	34.659	0		0			99	0	0	0	0	35.421	35.421	-0.243		0.243			99	0	0	0	0	26.377	26.377	0		0			99	0
		100	0	0	0	0	15.5	-1.528		1.528			100	0	0	0	0	34.659	0		0			100	0	0	0	0	35.664	35.664	44.459					100	0	0	0	0	26.377	26.377	0		0			100	0
		101	0	0	0	0	17.028	-0.767		0.767			101	0	0	0	0	34.659	0		0			101	0	0	0	0	8.795	-8.795	0		0			101	0	0	0	0	26.377	26.377	0		0			101	0
		102	0	0	0	0	17.795	-0.701		0.701			102	0	0	0	0	34.659	4.186					102	0	0	0	0	8.795	-8.795	-5.866		5.866			102	0	0	0	0	26.377	26.377	-3.016		3.016			102	0
		103	0	0	0	0	18.496	-1.119		1.119			103	0	0	0	0	30.473	0		0			103	0	0	0	0	2.929	-2.929	-4.388		4.388			103	0	0	0	0	29.393	29.393	0		0			103	0
		104	0	0	0	0	19.615	-1.725		1.725			104	0	0	0	0	30.473	3.162					104	0	0	0	0	1.459	1.459	-1.385		1.385			104	0	0	0	0	29.393	29.393	0		0			104	0
		105	0	0	0	0	21.34	-1.339		1.339			105	0	0	0	0	27.311	0		0			105	0	0	0	0	2.844	2.844	-3.125		3.125			105	0	0	0	0	29.393	29.393	0		0			105	0
		106	0	0	0	0	22.679	0		0			106	0	0	0	0	27.311	-2.877		2.877			106	0	0	0	0	5.969	5.969	-1.576		1.576			106	0	0	0	0	29.393	29.393	33.243					106	0
		107	0	0	0	0	22.679	-2.46		2.46			107	0	0	0	0	30.188	0		0			107	0	0	0	0	7.545	7.545	-1.45		1.45			107	0	0	0	0	3.85	-3.85	-3.894		3.894			107	0
		108	0	0	0	0	25.139	-1.066		1.066			108	0	0	0	0	30.188	-0.543		0.543			108	0	0	0	0	8.995	8.995	-1.971		1.971			108	0	0	0	0	0.044	0.044	-2.102		2.102			108	0
		109	0	0	0	0	26.205	-1.201		1.201			109	0	0	0	0	30.731	0		0			109	0	0	0	0	10.966	10.966	-1.78		1.78			109	0	0	0	0	2.146	2.146	-3.16		3.16			109	0
		110	0	0	0	0	27.406	0		0			110	0	0	0	0	30.731	0		0			110	0	0	0	0	12.746	12.746	-1.448		1.448			110	0	0	0	0	5.306	5.306	-1.873		1.873			110	0
		111	0	0	0	0	27.406	-0.943		0.943			111	0	0	0	0	30.731	-0.688		0.688			111	0	0	0	0	14.194	14.194	-2.976		2.976			111	0	0	0	0	7.179	7.179	-1.945		1.945			111	0
		112	0	0	0	0	28.349	0		0			112	0	0	0	0	31.419	0		0			112	0	0	0	0	17.17	17.17	-0.6		0.6			112	0	0	0	0	9.124	9.124	-3.156		3.156			112	0
		113	0	0	0	0	28.349	-1.383		1.383			113	0	0	0	0	31.419	0		0			113	0	0	0	0	17.77	17.77	-1.404		1.404			113	0	0	0	0	12.28	12.28	-1.6		1.6			113	0
		114	0	0	0	0	29.732	-1.278		1.278			114	0	0	0	0	31.419	-2.623		2.623			114	0	0	0	0	19.174	19.174	-1.66		1.66			114	0	0	0	0	13.88	13.88	-2.01		2.01			114	0
		115	0	0	0	0	31.01	-1.199		1.199			115	0	0	0	0	34.042	0		0			115	0	0	0	0	20.834	20.834	0		0			115	0	0	0	0	15.89	15.89	-1.841		1.841			115	0
		116	0	0	0	0	32.209	0		0			116	0	0	0	0	34.042	0		0			116	0	0	0	0	20.834	20.834	-2.023		2.023			116	0	0	0	0	17.731	17.731	-2.107		2.107			116	0
		117	0	0	0	0	32.209	30.319					117	0	0	0	0	34.042	0		0			117	0	0	0	0	22.857	22.857	-0.932		0.932			117	0	0	0	0	19.838	19.838	0		0			117	0
		118	0	0	0	0	1.89	-3.241		3.241			118	0	0	0	0	34.042	0		0			118	0	0	0	0	23.789	23.789	0		0			118	0	0	0	0	19.838	19.838	-1.787		1.787			118	0
		119	0	0	0	0	5.131	-1.953		1.953			119	0	0	0	0	34.042	0		0			119	0	0	0	0	23.789	23.789	-1.48		1.48			119	0	0	0	0	21.625	21.625	0		0			119	0
		120	0	0	0	0	7.084	-1.142		1.142			120	0	0	0	0	34.042	-0.887		0.887			120	0	0	0	0	25.269	25.269	0		0			120	0	0	0	0	21.625	21.625	-1.962		1.962			120	0
		121	0	0	0	0	8.226	-1.379		1.379			121	0	0	0	0	34.929	0		0			121	0	0	0	0	25.269	25.269	-2.466		2.466			121	0	0	0	0	23.587	23.587	0		0			121	0
		122	0	0	0	0	9.605	-1.761		1.761			122	0	0	0	0	34.929	0		0			122	0	0	0	0	27.735	27.735	0		0			122	0	0	0	0	23.587	23.587	0		0			122	0
		123	0	0	0	0	11.366	-1.311		1.311			123	0	0	0	0	34.929	0		0			123	0	0	0	0	27.735	27.735	-1.312		1.312			123	0	0	0	0	23.587	23.587	0		0			123	0
		124	0	0	0	0	12.677	-1.659		1.659			124	0	0	0	0	34.929	0		0			124	0	0	0	0	29.047	29.047	0		0			124	0	0	0	0	23.587	23.587	-1.871		1.871			124	0
		125	0	0	0	0	14.336	-1.975		1.975			125	0	0	0	0	34.929	0		0			125	0	0	0	0	29.047	29.047	0		0			125	0	0	0	0	25.458	25.458	0		0			125	0
		126	0	0	0	0	16.311	-0.812		0.812			126	0	0	0	0	34.929	0		0			126	0	0	0	0	29.047	29.047	0		0			126	0	0	0	0	25.458	25.458	0		0			126	0
		127	0	0	0	0	17.123	-1.721		1.721			127	0	0	0	0	34.929	0		0			127	0	0	0	0	29.047	29.047	0		0			127	0	0	0	0	25.458	25.458	0		0			127	0
		128	0	0	0	0	18.844	0		0			128	0	0	0	0	34.929	0		0			128	0	0	0	0	29.047	29.047	-2.131		2.131			128	0	0	0	0	25.458	25.458	-2.713		2.713			128	0
		129	0	0	0	0	18.844	-0.29		0.29			129	0	0	0	0	34.929	0		0			129	0	0	0	0	31.178	31.178	0		0			129	0	0	0	0	28.171	28.171	0		0			129	0
		130	0	0	0	0	19.134	-2.085		2.085			130	0	0	0	0	34.929	0		0			130	0	0	0	0	31.178	31.178	0		0			130	0	0	0	0	28.171	28.171	0		0			130	0
		131	0	0	0	0	21.219	-1.822		1.822			131	0	0	0	0	34.929	0		0			131	0	0	0	0	31.178	31.178	0		0			131	0	0	0	0	28.171	28.171	0		0			131	0
		132	0	0	0	0	23.041	0		0			132	0	0	0	0	34.929	0		0			132	0	0	0	0	31.178	31.178	0		0			132	0	0	0	0	28.171	28.171	24.317					132	0
		133	0	0	0	0	23.041	-1.985		1.985			133	0	0	0	0	34.929	0		0			133	0	0	0	0	31.178	31.178	38.006					133	0	0	0	0	3.854	3.854	0		0			133	0
		134	0	0	0	0	25.026	0		0			134	0	0	0	0	34.929	0		0			134	0	0	0	0	6.828	-6.828	-1.275		1.275			134	0	0	0	0	3.854	3.854	-3.771		3.771			134	0
		135	0	0	0	0	25.026	0		0			135	0	0	0	0	34.929	0		0			135	0	0	0	0	5.553	-5.553	-4.028		4.028			135	0	0	0	0	7.625	7.625	-1.321		1.321			135	0
		136	0	0	0	0	25.026	0		0			136	0	0	0	0	34.929	0		0			136	0	0	0	0	1.525	-1.525	-2.631		2.631			136	0	0	0	0	8.946	8.946	-1.296		1.296			136	0
		137	0	0	0	0	25.026	-1.79		1.79			137	0	0	0	0	34.929	1.716					137	0	0	0	0	1.106	1.106	-3.41		3.41			137	0	0	0	0	10.242	10.242	0		0			137	0
		138	0	0	0	0	26.816	0		0			138	0	0	0	0	33.213	0		0			138	0	0	0	0	4.516	4.516	-2.773		2.773			138	0	0	0	0	10.242	10.242	-1.969		1.969			138	0
		139	0	0	0	0	26.816	-2.173		2.173			139	0	0	0	0	33.213	0		0			139	0	0	0	0	7.289	7.289	-1.488		1.488			139	0	0	0	0	12.211	12.211	-1.932		1.932			139	0
		140	0	0	0	0	28.989	0		0			140	0	0	0	0	33.213	0		0			140	0	0	0	0	8.777	8.777	-2.65		2.65			140	0	0	0	0	14.143	14.143	-1.035		1.035			140	0
		141	0	0	0	0	28.989	-1.077		1.077			141	0	0	0	0	33.213	26.121					141	0	0	0	0	11.427	11.427	-1.245		1.245			141	0	0	0	0	15.178	15.178	-1.417		1.417			141	0
		142	0	0	0	0	30.066	0		0			142	0	0	0	0	7.092	0		0			142	0	0	0	0	12.672	12.672	-2.397		2.397			142	0	0	0	0	16.595	16.595	-1.334		1.334			142	0
		143	0	0	0	0	30.066	-1.492		1.492			143	0	0	0	0	7.092	-1.358		1.358			143	0	0	0	0	15.069	15.069	-1.359		1.359			143	0	0	0	0	17.929	17.929	-0.819		0.819			143	0
		144	0	0	0	0	31.558	0		0			144	0	0	0	0	8.45	-1.246		1.246			144	0	0	0	0	16.428	16.428	-1.978		1.978			144	0	0	0	0	18.748	18.748	-1.617		1.617			144	0
		145	0	0	0	0	31.558	0		0			145	0	0	0	0	9.696	-1.855		1.855			145	0	0	0	0	18.406	18.406	-1.626		1.626			145	0	0	0	0	20.365	20.365	0		0			145	0
		146	0	0	0	0	31.558	28.042					146	0	0	0	0	11.551	-1.651		1.651			146	0	0	0	0	20.032	20.032	-1.212		1.212			146	0	0	0	0	20.365	20.365	0		0			146	0
		147	0	0	0	0	3.516	-3.586		3.586			147	0	0	0	0	13.202	0		0			147	0	0	0	0	21.244	21.244	-2.516		2.516			147	0	0	0	0	20.365	20.365	-1.896		1.896			147	0
		148	0	0	0	0	7.102	-2.4		2.4			148	0	0	0	0	13.202	-1.635		1.635			148	0	0	0	0	23.76	23.76	-1.582		1.582			148	0	0	0	0	22.261	22.261	0		0			148	0
		149	0	0	0	0	9.502	-0.669		0.669			149	0	0	0	0	14.837	-1.346		1.346			149	0	0	0	0	25.342	25.342	-1.468		1.468			149	0	0	0	0	22.261	22.261	-3.124		3.124			149	0
		150	0	0	0	0	10.171	-1.798		1.798			150	0	0	0	0	16.183	-0.819		0.819			150	0	0	0	0	26.81	26.81	-0.449		0.449			150	0	0	0	0	25.385	25.385	0		0			150	0
		151	0	0	0	0	11.969	-1.362		1.362			151	0	0	0	0	17.002	0		0			151	0	0	0	0	27.259	27.259	0		0			151	0	0	0	0	25.385	25.385	0		0			151	0
		152	0	0	0	0	13.331	0		0			152	0	0	0	0	17.002	-1.72		1.72			152	0	0	0	0	27.259	27.259	0		0			152	0	0	0	0	25.385	25.385	0		0			152	0
		153	0	0	0	0	13.331	-1.673		1.673			153	0	0	0	0	18.722	0		0			153	0	0	0	0	27.259	27.259	0		0			153	0	0	0	0	25.385	25.385	-1.642		1.642			153	0
		154	0	0	0	0	15.004	-2.132		2.132			154	0	0	0	0	18.722	0		0			154	0	0	0	0	27.259	27.259	-3.802		3.802			154	0	0	0	0	27.027	27.027	0		0			154	0
		155	0	0	0	0	17.136	-1.568		1.568			155	0	0	0	0	18.722	-1.87		1.87			155	0	0	0	0	31.061	31.061	0		0			155	0	0	0	0	27.027	27.027	0		0			155	0
		156	0	0	0	0	18.704	0		0			156	0	0	0	0	20.592	0		0			156	0	0	0	0	31.061	31.061	0		0			156	0	0	0	0	27.027	27.027	0		0			156	0
		157	0	0	0	0	18.704	-1.596		1.596			157	0	0	0	0	20.592	-2.046		2.046			157	0	0	0	0	31.061	31.061	0		0			157	0	0	0	0	27.027	27.027	30.134					157	0
		158	0	0	0	0	20.3	-1.677		1.677			158	0	0	0	0	22.638	0		0			158	0	0	0	0	31.061	31.061	-0.541		0.541			158	0	0	0	0	3.107	-3.107	-3.144		3.144			158	0
		159	0	0	0	0	21.977	0		0			159	0	0	0	0	22.638	-1.151		1.151			159	0	0	0	0	31.602	31.602	0		0			159	0	0	0	0	0.037	0.037	0		0			159	0
		160	0	0	0	0	21.977	-1.588		1.588			160	0	0	0	0	23.789	0		0			160	0	0	0	0	31.602	31.602	0		0			160	0	0	0	0	0.037	0.037	0		0			160	0
		161	0	0	0	0	23.565	-1.28		1.28			161	0	0	0	0	23.789	-2.115		2.115			161	0	0	0	0	31.602	31.602	-1.327		1.327			161	0	0	0	0	0.037	0.037	-13.511		13.511			161	0
		162	0	0	0	0	24.845	0		0			162	0	0	0	0	25.904	-1.451		1.451			162	0	0	0	0	32.929	32.929	0		0			162	0	0	0	0	13.548	13.548	-2.958		2.958			162	0
		163	0	0	0	0	24.845	-1.066		1.066			163	0	0	0	0	27.355	-1.142		1.142			163	0	0	0	0	32.929	32.929	0		0			163	0	0	0	0	16.506	16.506	-2.153		2.153			163	0
		164	0	0	0	0	25.911	-1.163		1.163			164	0	0	0	0	28.497	-0.031		0.031			164	0	0	0	0	32.929	32.929	0		0			164	0	0	0	0	18.659	18.659	0		0			164	0
		165	0	0	0	0	27.074	0		0			165	0	0	0	0	28.528	0		0			165	0	0	0	0	32.929	32.929	0		0			165	0	0	0	0	18.659	18.659	0		0			165	0
		166	0	0	0	0	27.074	0		0			166	0	0	0	0	28.528	0		0			166	0	0	0	0	32.929	32.929	0		0			166	0	0	0	0	18.659	18.659	0		0			166	0
		167	0	0	0	0	27.074	-2.016		2.016			167	0	0	0	0	28.528	-1.659		1.659			167	0	0	0	0	32.929	32.929	0		0			167	0	0	0	0	18.659	18.659	0		0			167	0
		168	0	0	0	0	29.09	0		0			168	0	0	0	0	30.187	0		0			168	0	0	0	0	32.929	32.929	0		0			168	0	0	0	0	18.659	18.659	-0.928		0.928			168	0
		169	0	0	0	0	29.09	0		0			169	0	0	0	0	30.187	-0.888		0.888			169	0	0	0	0	32.929	32.929	0		0			169	0	0	0	0	19.587	19.587	0		0			169	0
		170	0	0	0	0	29.09	-3.245		3.245			170	0	0	0	0	31.075	0		0			170	0	0	0	0	32.929	32.929	32.489					170	0	0	0	0	19.587	19.587	0		0			170	0
		171	0	0	0	0	32.335	0		0			171	0	0	0	0	31.075	0		0			171	0	0	0	0	0.44	0.44	4.627					171	0	0	0	0	19.587	19.587	-1.107		1.107			171	0
		172	0	0	0	0	32.335	0		0			172	0	0	0	0	31.075	0		0			172	0	0	0	0	4.187	-4.187	-4.284		4.284			172	0	0	0	0	20.694	20.694	0		0			172	0
		173	0	0	0	0	32.335	0		0			173	0	0	0	0	31.075	-1.725		1.725			173	0	0	0	0	0.097	0.097	-3.264		3.264			173	0	0	0	0	20.694	20.694	-1.576		1.576			173	0
		174	0	0	0	0	32.335	0		0			174	0	0	0	0	32.8	0		0			174	0	0	0	0	3.361	3.361	-4.199		4.199			174	0	0	0	0	22.27	22.27	0		0			174	0
		175	0	0	0	0	32.335	0		0			175	0	0	0	0	32.8	-1.083		1.083			175	0	0	0	0	7.56	7.56	-1.686		1.686			175	0	0	0	0	22.27	22.27	-1.338		1.338			175	0
		176	0	0	0	0	32.335	0		0			176	0	0	0	0	33.883	0		0			176	0	0	0	0	9.246	9.246	-2.489		2.489			176	0	0	0	0	23.608	23.608	0		0			176	0
		177	0	0	0	0	32.335	0		0			177	0	0	0	0	33.883	0		0			177	0	0	0	0	11.735	11.735	-1.087		1.087			177	0	0	0	0	23.608	23.608	0		0			177	0
		178	0	0	0	0	32.335	26.522					178	0	0	0	0	33.883	-1.135		1.135			178	0	0	0	0	12.822	12.822	-1.379		1.379			178	0	0	0	0	23.608	23.608	0		0			178	0
		179	0	0	0	0	5.813	-3.271		3.271			179	0	0	0	0	35.018	0		0			179	0	0	0	0	14.201	14.201	-2.227		2.227			179	0	0	0	0	23.608	23.608	0		0			179	0
		180	0	0	0	0	9.084	-2.506		2.506			180	0	0	0	0	35.018	0		0			180	0	0	0	0	16.428	16.428	-1.872		1.872			180	0	0	0	0	23.608	23.608	0		0			180	0
		181	0	0	0	0	11.59	-1.566		1.566			181	0	0	0	0	35.018	0		0			181	0	0	0	0	18.3	18.3	-0.692		0.692			181	0	0	0	0	23.608	23.608	-2.56		2.56			181	0
		182	0	0	0	0	13.156	-1.353		1.353			182	0	0	0	0	35.018	0		0			182	0	0	0	0	18.992	18.992	-1.177		1.177			182	0	0	0	0	26.168	26.168	0		0			182	0
		183	0	0	0	0	14.509						183	0	0	0	0	35.018						183	0	0	0	0	20.169	20.169						183	0	0	0	0	26.168	26.168						183	0
[truncated: 128 more columns]
