# Supplementary material for: Lifelong regeneration of cerebellar Purkinje cells after induced cell ablation in zebrafish
Source: eLife. 2023 Apr 12;12:e79672. doi: 10.7554/eLife.79672 (PMC10147380; doi:10.7554/eLife.79672)
Supplement: Figure 4—source data 3. [file elife-79672-fig4-data3.xlsx]

## Sheet: Hoja1
		Figure 4D	Number saccades	(4-OHT=PC-ablated, EtOH=control)					Figure 4D	Speed eye rotation	(4-OHT=PC-ablated, EtOH=control)
			4-OHT 2dpt	EtOH 2dpt	4-OHT 10dpt	EtOH 10dpt			4-OHT 2dpt	EtOH 2dpt	4-OHT 10dpt	EtOH 10dpt
		first trial	6	8	6	7		first trial	4.556	6.24	6.052	6.128
			1	9	6	9			0.94	7.72	6.5	6.748
			7	7	0	1			5.736	6.152	1.12	3.368
			0	6	8	8			1.504	7.008	5.968	6.936
			1	8	7	5			0.776	7.268	6.64	4.636
			3	7	3	6			2.46	5.852	4.384	6.32
			0	6	8	5			1.532	5.992	6.748	3.52
			6	4	7	9			5.668	4.908	6.716	7.168
			3	6	5	7			3.276	5.376	5.248	6.076
			5	8	8	4			4.628	6.108	7.452	5.16
			8	9	8	6			5.324	7.204	6.776	6.352
			3	6	6	8			3.352	5.892	6.148	8.828
			4						3.408
		second trial	4	7	7	8		second trial	4.02	5.864	5.46	5.708
			3	3	4	8			2.692	4.024	3.824	5.66
			5	4	6	1			3.188	3.196	4.3	1.868
			2	8	4	6			1.6	4.948	3.2	5.248
			1	7	4	1			0.796	4.788	1.396	0.804
			5	3	4	6			4.636	5.316	3.32	4.328
			0	2	10	4			0.836	2.796	6.708	2.804
			3	5	5	4			3.796	3.56	4.04	3.656
			1	6	7	2			2.176	4.992	5.044	2.092
			5	9	2	5			4.116	5.76	1.992	5.14
			2	1	5	7			1.32	2.884	5.236	5.216
			4	8	5	4			3.936	6.64	5.428	3.608
			0	5	6	3			0.612	3.864	4.564	4.336
			1	6	6	0			1.408	4.456	5.724	1.256
			6	1	1	7			4.832	2.464	2.328	4.512
				6	8					5.348	5.084
