# Supplementary material for: Lifelong regeneration of cerebellar Purkinje cells after induced cell ablation in zebrafish
Source: eLife. 2023 Apr 12;12:e79672. doi: 10.7554/eLife.79672 (PMC10147380; doi:10.7554/eLife.79672)
Supplement: Figure 5—source data 1. [file elife-79672-fig5-data1.xlsx]

## Sheet: Hoja1
		Figure 5C	% time middle zone 2dpt						Figure 5C	% time middle zone 9-11dpt						Figure 5C	frequency middle zone 2dpt						Figure 5C	frequency middle zone 9-11dpt						Figure 5D	total distance moved 2dpt						Figure 5D	total distance moved 9-11dpt						Figure 5D	mean swimming speed 2dpt
			(control)	(control)	(control)	(control)	(PC-ablated)			(control)	(control)	(control)	(control)	(PC-ablated)			(control)	(control)	(control)	(control)	(PC-ablated)			(control)	(control)	(control)	(control)	(PC-ablated)			(control)	(control)	(control)	(control)	(PC-ablated)			(control)	(control)	(control)	(control)	(PC-ablated)
			untreat-WT	untreat-Tg	EtOH-Tg	4-OHT-WT	4-OHT-Tg			untreat-WT	untreat-Tg	EtOH-Tg	4-OHT-WT	4-OHT-Tg			untreat-WT	untreat-Tg	EtOH-Tg	4-OHT-WT	4-OHT-Tg			untreat-WT	untreat-Tg	EtOH-Tg	4-OHT-WT	4-OHT-Tg			untreat-WT	untreat-Tg	EtOH-Tg	4-OHT-WT	4-OHT-Tg			untreat-WT	untreat-Tg	EtOH-Tg	4-OHT-WT	4-OHT-Tg			untreat-WT	untreat-Tg	EtOH-Tg	4-OHT-WT	4-OHT-Tg
		trial#1	7.68554	16.5856	8.39811	8.85472	3.45179		trial#1	6.21848	14.1382	47.0614	7.48542	11.7814		trial#1	28	41	11	16	4		trial#1	34	59	14	35	46		trial#1	1620.53	1554.67	1289.68	1385.89	1616		trial#1	2494.56	2711.41	341.751	1892.67	2190.84		trial#1	4.57169	4.37006	3.74176	3.91636	5.00354
				2.69945		13.3074	14.1033			35.1964	8.23573	1.95861	17.6558	7.12795				11		27	31			50	29	5	28	23				1923.28		1146.82	2037.91			1358.71	2284.79	1877.09	1556.56	1470.92				5.55801		3.18704	5.66891
			11.4057	14.9836	0.124989	4.39413	6.86193			3.96058	12.3466	5.96842	28.3029	40.4593			28	35	1	6	9			10	39	21	49	75			1906.08	2123.56	2323.7	1424.56	1578.89			1749.73	2162.87	2542.44	1657.96	765.9			5.35183	5.94382	7.58502	4.08218	4.45965
			0.541366	28.5225	4.67722	2.84762	5.56173			14.6275	51.3448	2.09288	17.5539	11.3962			4	28	6	9	5			33	56	7	56	42			1637.68	1213.35	818.544	1727.61	1081			1292.79	868.763	1595.92	2130.6	2768.98			4.88754	3.38637	2.65499	5.06154	3.1594
			5.10827	13.826	1.8647	11.8165	6.18175			6.13057	16.7269	33.6389	12.3579	12.6731			14	25	12	20	23			24	31	53	66	19			1753.37	1524.19	1060.78	1323.69	2125.84			2155.24	1566.41	1183.95	2119.09	1446.87			5.29712	4.23459	4.34175	3.85143	6.08794
			9.81399	18.484	8.18064	18.447	9.12919			77.9808	5.41179	6.90837	24.9282	13.3028			12	32	11	15	21			49	21	20	55	43			1709.8	1697.67	1300.45	1004.24	1892.95			790.332	1663.94	2212.89	1505.35	1826.53			4.75907	4.72005	4.0832	2.79314	5.25545
			30.5756	24.9803		0.569524	6.74625			6.11206	20.3092	10.9599	17.0771	3.25045			42	18		3	14			14	61	33	41	18			1395.69	1167.36		1332.94	1376.66			1463.79	1809.54	2154.44	1822.03	2330.62			4.05777	3.25711		4.29052	4.03254
			10.2813	6.49164	11.6371	9.96435	5.6774			3.2064	6.86542	8.48729	2.47199	7.44085			21	7	25	23	7			19	36	19	13	10			1263.02	609.363	1675.28	1586.73	1390.75			2771.65	2350.17	2056.86	2245.12	1205.75			3.53108	2.00412	4.70138	4.65855	3.94085
			30.0944	4.4358		46.1546				56.3226	20.6565	9.1309	22.8889	8.22223			29	10		27				79	45	13	62	23			739.42	1570.06		673.583				1387	1777.05	1339.27	2309.8	1939.62			2.52617	4.51919		2.17118
			23.3528	0	7.23209	1.32426	18.9524			0.272984	38.1649	3.95888	13.9478	7.95944			42	0	22	5	25			2	57	16	38	27			1348.4	1363.4	1523.98	1329.82	1020.44			1580.52	1320.09	2061.77	1568.12	1995.91			3.86705	4.28782	4.3654	3.89933	3.04454
			16.1901	11.196	12.8077	10.3255	10.8551			10.8176	12.1348	34.565	18.6742	17.5626			22	30	23	16	31			32	34	42	45	66			1101.78	1758.98	1387.24	1233.61	1636.21			2245.4	1693.19	1199.89	1600.9	2495.2			3.16145	5.79685	3.95558	3.61933	4.58188
			4.56691	1.9802	8.0881	2.62073	7.09791			11.1692		4.65342		18.0316			10	17	17	5	15			30		13		39			1323.6	1756.87	1721.61	1712.68	1541.1			1955.85		1894.58		1671.17			3.77141	5.04068	4.86142	5.16924	5.13837
			3.55588	6.54206	34.7029	6.61605	4.72423			4.56944	7.11574		9.00204	5.16667			9	13	38	10	12			23	16		40	15			1551.32	1525.24	1173.57	1351.9	1622.85			2042.08	1684.36		1536.8	2072.51			4.3533	4.30893	3.4216	4.02785	4.59571
			1.58348	39.5855	0.773757	10.1255	8.16213			1.54876	5.69907	5.57022	10.9943	19.3287			2	37	2	17	13			5	16	20	19	82			1220.49	863.8	1465.27	1692.27	1340.44			1717.51	1724.8	1996.13	1607.12	2115.61			3.41773	2.40097	4.30956	4.70331	3.89923
			11.8576	7.87915	0.846752	14.0251	4.96483			19.7407	3.91204	24.9016	13.1811	5.07408			34	25	4	20	13			25	6	15	40	10			1529.12	1323.88	1882.91	1109.36	1647.21			1083.89	1412.71	650.29	1965.05	1054.89			4.79892	4.11052	5.60297	3.3758	4.72446
			7.06084	16.4801	10.4259					5.17314	30.7315	21.7854	11.2398	30.4074			15	25	36					30	49	69	18	26			1450.24	1461.63	1866.19					2265.46	1081.36	2361.65	1420.07	707.633			5.318	4.24557	5.94382
			0.180572	1.22143	8.29169	0.222665	17.99			12.3935	4.83796	0	10.1464	11.3102			1	5	12	2	33			40	11	0	42	33			241.843	1676.96	1070.56	2376.62	1554.81			2073.52	2269.1	2703.53	2935.79	1858.61			0.671869	4.65837	3.08486	8.10245	4.46542
			8.64432	14.9209	6.31131	14.5655	13.4185			13.2083	2.59722	6.48238	13.6536	7.76852			20	18	18	15	26			32	8	18	40	11			1492.46	1144.18	1956.51	1014.77	1437.95			2095.48	1889.54	1712.57	1759.15	1171.5			4.48337	3.26283	5.51693	2.93451	3.99334
			26.3497	10.5256	12.2293	37.6923	11.0587			45.2083	8.21296	11.5618	9.0669	4.89815			45	28	33	21	14			64	22	38	19	13			1183.26	1403.39	1577.59	1005.82	1416.8			1360.85	2212.55	2328.8	1771.3	2175.69			3.49126	4.12534	4.80405	2.9664	4.1933
			6.90805	2.48594	9.81399	7.41238	3.54433			8.77315	21.0093	8.52896	6.97944	17.9583			20	10	22	15	4			27	18	29	41	45			1331.49	1416.09	1649.36	1341.99	1560.93			2150.51	776.961	2028.67	2629.69	1926.49			4.09056	4.69052	4.64318	3.88076	4.49655
					4.39108		20.7662			16	20.9259	13.6084	5.35582	18.9537					11		19			32	64	34	11	59					1847.51		1123.66			1442.16	2120.11	2151.25	2118.39	2381.09					5.9047		3.54108
			23.1966	26.1729	9.11993	1.71783	1.80918			0.930555	14.3287	2.12066	12.9726	6.20833			63	17	15	5	4			7	47	7	26	15			1847.92	1018.53	1557.55	1575.71	1411.37			1903.25	2296.78	1584.43	1777.27	1869.68			5.46553	2.83657	4.3835	5.17355	4.60222
			0.76859	29.3513	32.94	5.69934	7.67166			10.3704	17.1019	14.7289	11.4622	11.0417			3	32	33	12	16			39	79	25	29	44			670.35	1136.4	1173.71	1603.54	1602.48			1958.24	3150.72	1841.94	2330.24	2508.94			1.91389	3.29291	3.29935	4.52078	4.61936
			12.1539	5.608	14.5567	6.36141	12.0998			6.03704	41.0185	7.74645	3.85007	1.76389			17	13	23	9	24			15	57	28	20	4			1245.85	1706.3	1250.16	1097.98	1490.94			1946.93	1100.52	2484.26	2085.39	2614.45			3.83273	4.88671	3.72715	3.65541	4.45783
			26.2073	2.54026	5.12631	1.06413				29.7546	29.9746	14.9408	19.6185	6.63983			31	3	10	2				44	11	31	27	11			1120.47	509.61	1410.48	1232.5				989.044	1064.98	1499.79	722.574	1383.64			3.15637	1.41511	4.12698	3.47145
			7.31583		1.30934	4.8811	6.09846			9.9537	17.3867	4.9417	6.31106	14.6493			29		3	11	9			14	47	7	23	22			1761.28		1011.65	1421.53	1127.3			1537.99	1749.97	892.645	2487.61	1833.63			4.94086		3.17741	3.98406	3.2019
			73.6769	2.45234	22.5733	23.6004	9.08754			10.0185	14.6872	2.27651		23.0381			6	7	47	26	8			19	31	12		19			471.502	1858.9	1369.18	1158.47	1268.43			1845.81	1699.12	2222.36		951.446			1.31141	5.57942	3.91004	3.2906	3.58224
			0.0555633	0.860633	4.13621	3.3686	0.166574			10.5972	9.65875	7.14881	5.52392	4.44198			2	9	8	9	1			28	31	17	11	13			1645.05	1914.01	1547.63	1494.84	1352.61			1909.38	2567.18	1796.82	1613.1	1924.02			4.70143	5.35453	4.71976	4.96812	4.26305
			12.8722	4.87692	13.5144	11.4881	3.49375			5.80873	1.84748	10.1795		7.91227			27	19	18	10	12			21	3	25		34			1802.18	1545.26	1182.83	1177.25	1247.46			2314.38	1758.15	1769.42		1840.5			5.19476	4.31389	3.60633	3.7764	3.73449
			0	6.42699	9.03118	2.16064	0.499723			45.4583	11.7424	22.4135	18.2664	15.0564			0	13	13	11	2			40	37	43	50	34			511.495	1654.05	846.271	1111.37	2247.06			997.775	2055.77	1714.96	1866.55	1226.68			1.42132	4.59304	2.64043	3.12734	6.24464
			17.859	7.07477	9.76682	7.088	2.59115			40.7176	10.5431	10.323	11.5942	9.95743			19	9	24	6	5			47	25	31	29	20			1080.73	1340.66	885.774	975.115	1098.63			1223.6	1708.43	2058.64	2091.09	1540.36			3.00281	3.76267	2.67602	2.7864	3.06991
			21.9382	41.5325	26.7836	12.1357	5.20544			8.30556	10.219	15.5192	21.4706	4.52989			36	41	5	19	8			14	23	30	27	7			1834.93	853.875	461.399	944.19	1318.95			1205.22	1930.11	1616.8	1190.59	1316.7			5.14075	2.67431	1.31607	2.92813	3.73089
			16.7885	8.08347	26.5476		1.64452			22.7222	8.6725	28.2112	14.5748	16.1438			70	12	32		3			50	25	51	24	23			607.565	1150.12	911.051		1800			1742.74	2006.69	1338.59	982.676	1325.36			3.7799	3.25025	2.65106		6.51576
			22.5541	58.2639	21.6943	2.23466	2.54951			14.5741	12.8768	2.89191	6.4546	8.72795			20	25	19	5	6			46	18	7	18	23			1467.52	778.305	849.3	1137.55	1230.59			1760.98	1490.4	1916.49	2198.56	1665.37			4.16609	2.16123	2.39416	3.32822	3.55965
			4.20892	23.1591	6.4449	3.85861	4.53452			15.6343	61.1566	25.8144	31.5183	24.69			2	20	17	2	5			39	75	54	39	29			894.494	793.034	1634.56	1359.75	1362.06			2108.09	1252.17	1840.21	1396.32	1001.54			2.53706	2.35761	4.92726	4.09146	3.93369
			9.14016		1.65633	7.37948	15.7427			24.412	8.32986	0.249861	23.1653	8.49991			29		3	9	42			28	24	2	67	27			1913.04		1188.12	1215.76	1655.08			906.355	1980.97	2238.45	1930.13	1660.41			6.07048		4.2526	3.55601	5.0585
		trial#2	13.5633	9.87375	17.3149	0.993513	17.2532		trial#2	6.61765	26.582	17.0929	1.06831	1.07875		trial#2							trial#2	1	2	21	3	2		trial#2	1521.85	1274.44	414.825	174.085	494.819		trial#2	169.345	252.136	759.599	219.908	1588.47		trial#2	4.62692	3.69337	1.24922	0.477826	1.40009
			3.50247	49.1514	36.6108	6.58259	7.50858			4.48576	5.91962	4.18998	39.799	16.7021			22	21	11	1	14			3	3	9	37	33			1242.72	1338.57	1077.04	1259.76	1033.67			233.129	239.303	1016.72	218.537	192.478			3.89115	3.72474	3.05008	3.57599	3.09233
			17.2988	39.162	1.23909	9.42249	12.3063			5.9366		11.2658	43.0976	18.1507			9	47	46	13	17			20		7	35	9			1256.69	939.537	154.894	1768.22	1174.38			1388.33		744.686	993.896	412.195			4.38062	2.65529	0.451969	4.84009	3.42059
			11.6261	17.3981	4.89294		8.46784			13.6376	3.39258	0	6.75915	3.35061			43	32	8	25	27			26	11	0	2	10			1452.9	380.102	838.544		1361.47			1125.11	999.838	267.008	118.039	361.758			4.20996	1.05984	2.44004		4.34651
				9.24016	65.028	21.3174	4.57426			6.95061	1.04082	8.05406	9.11067	13.3423			29	12	6		21			17	1	10	19	8				1449.83	1159.92	1425.02	1931.51			993.345	137.891	1178.04	1211.56	253.096				4.08534	3.23195	3.89089	5.52627
			17.4837	17.1854	37.1271	38.874	11.5109			4.08343	18.7763	5.77626	19.1047	5.3221				12	51	41	9			3	29	10	16	4			803.298	905.453	1289.78	1304.81	1681.62			634.652	917.39	1230.19	872.593	569.305			2.32911	2.51451	3.85065	3.5486	5.12593
			36.2137		19.6067	13.4084				0	21.1083	49.6786	25.8383	0.407257			22	31	62	52	37			0	22	35	13	1			900.929		1210.83	392.369				202.351	742.287	826.832	598.25	412.923			2.60992		3.95039	1.23503
			22.4665		8.43084	10.5975	0			1.45404	0		41.4114	11.5863			39		16	8				1	0		12	6			1312.61		429.416	1936.68	2125.95			554.801	50.7328		356.623	593.793			3.76866		1.30629	5.72893	7.49703
			28.8953	14.3227	21.7222	20.4555	16.8702			6.99686	2.10424	16.2281	16.8386	0			32		7	30	0			7	3	11	36	0			1371.6	2372.73	892.443	678.163	1043.7			437.861	332.093	595.691	1471.94	122.951			3.84107	6.67396	2.63694	1.84469	3.03511
			0.0373935	6.09999	19.0075	11.1237	29.7692			9.64669	11.9618	24.3814	15.428				39	41	20	22	32			11	2	17	22				592.176	2440.64	1610.87	1349.15	1823.46			1044.31	218.768	119.679	1267.77				2.00116	6.91234	4.90502	3.67989	5.39585
			7.06945	8.10711	3.51032	12.9202	5.88263			13.5868	0	17.9577	24.961	19.0624			1	17	38	19	65			19	0	21	7	4			351.425	1927.67	274.555	1448.16	1176.11			1568.49	185.121	643.829	312.784	311.15			0.972508	5.50975	0.810562	3.93917	3.97089
			42.8941	3.86055	1.52615	4.77249	0.705622			9.17499	1.27783	11.0299	15.5945	51.157			2	20	14	25	10			6	1	4	6	11			989.8	1035	215.136	1641.88	1821.21			339.04	108.766	431.8	390.153	270.589			2.75041	3.2772	0.614178	4.84589	5.2493
			7.11742	23.4935	15.4671	26.814	1.58188										45	8	2	12	1										1851.27	1452.48	1245.03	971.746	1091.89										5.15688	4.0477	3.35995	2.70453	3.17573
			13.8972	0	0	47.5651	3.95241			0	9.61592	8.39402	16.2168	8.4339			13	50	13	21	2			0	14	12	16	15			1659.83	1119.48	207.739	434.887	1304.83			136.547	969.381	567.699	466.673	598.561			4.62984	3.14575	0.891107	1.27028	3.71926
			7.73251	7.65389	19.7687	28.3171	13.725			10.8098	0	4.23338	5.4972	18.0608			43	0	0	28	8			9	0	8	13	2			2164.16	1015.19	1367.42	1040.1	1472.31			750.567	278.832	208.918	719.696	296.962			6.19248	2.82487	3.65619	2.89855	4.13104
			13.6891	28.7514	3.27402	44.2137	1.01462			12.087	5.84914	93.0728	22.4932	2.0946			30	11	35	27	23			1	15	2	5	4			1084.02	1044.24	2059.02	1400.87	1125.18			230.459	1252.15	112.926	468.287	386.727			3.02203	3.02348	5.63765	4.0167	3.13825
			29.7137	21.7873	2.19306	20.3395	11.6451			4.85886			8.11161				24	38	5	69	2			9			7				968.82	1342.21	573.017	1468.16	1664.98			1264.99			377.336				2.69523	3.81724	1.69949	4.10826	4.62402
			11.1409	14.5262	0.818579	26.0463	2.33824			13.7799	2.41092	6.22517	7.54245	7.39354			44	33	1	40	33			38	1	3	16	3			1830.7	1045.53	1708.48	1105.69	1770.47			1404.65	182.281	399.286	1102.47	278.841			5.08139	2.91514	4.66529	3.07091	4.8959
			16.5611	0	45.1735	1.65564	19.6421			6.74225			14.1878	17.7313			25	24	4	30	4			9			25	11			1784.34	93.2233	1202.86	565.787	854.112			1208.65			903.619	329.463			4.97507	0.332582	3.23264	1.71541	2.36854
			11.3384	27.4476	2.9137	2.22448				0		11.968	3.59076	1.05424			27	0	49	3	5			0		28	8	2			1241.3	753.616	2045.13	835.422				144.408		1204.6	555.145	246.66			4.28584	2.12854	5.58838	2.37529
			5.56352	15.3494	18.9279	6.54396	10.1646			0	23.2068		0.439591	20.983			45	38	5	4				0	1		6	22			1604.13	1470.9	1052.91	1344.48	627.784			836.192	167.142		207.471	1028.44			4.53014	4.17136	2.86106	3.90186	1.73665
			24.6774	28.1367	7.88701	10.9559	0			69.7871	34.4192			10.9585			18	31	21	15	10			5	41			4			1130.64	1322.24	1397.43	1303.16	1049.73			246.325	1025.39			349.452			3.18532	3.70942	3.76649	3.91208	2.90954
			15.4419	0.574919	10.2091	6.90931	10.0078			25.8579			11.2304	13.5016			25	27	18	3	0			6			7	23			1594.94	403.672	1296.92	2060.12	1327.1			258.916			620.837	1188.01			4.47445	1.45897	3.48245	6.27688	3.68855
				29.3576	2.7669	17.153				32.9398	37.7795	11.5052	34.6027	2.23794			35	2	22	22	22			15	1	18	48	1				1249.51	1536.02	1426.4				151.288	36.1653	1359.41	980.85	247.902				3.47094	4.14546	4.42588
										9.00046	7.02453	1.83584	0.985609	4.04125				44	8	37				8	20	6	1	6										568.909	1502.85	1272.85	355.321	502.821
							13.8176																												1222.62														3.64671
			7.62469	2.20085	23.6486	0	0														30										1111.97	1126.9	1153.83	902.047	276.547										3.29502	3.16986	3.20204	2.70914	0.79736
			5.34757	11.5036	20.7331	10.4455	13.5235										19	4	46	0	0										1745.21	578.354	1069.4	1194.14	1438.43										4.95353	1.60531	2.99128	3.39133	4.05973
			18.2734	30.4929	26.6892	10.4732	5.36831		trial#3	33.4353		9.33561	23.7729	5.23882			16	10	32	20	21		trial#3								956.779	1092.78	1334.8	1252.22	1509.85		trial#3	1137.29		2741.05	1812.17	2649.17			2.68405	3.11246	3.78899	3.53519	4.59161
			4.09927	11.0459	11.5929	10.4962	0.644197			24.2483			10.9633	2.75581			16	31	34	16	11			31		41	50	13			2204.3	1046.68	1246.2	1961.45	1502.41			1407.87			1623.54	3922.97			6.24037	2.93292	3.51386	5.95982	4.32853
			2.01959	0.439246	0.703443	0	0			37.4241		10.0189	12.7682	7.7542			15	20	22	29	4			31			14	4			1213.96	291.601	1448.1	43.4381	1826.21			1397.21		1019.45	2336.77	1230.24			3.4103	0.856792	4.13685	0.330283	5.1233
			28.8982	80.3311	5.44243	8.66538	10.3212			51.6516		3.6613	1.69905	40.3755			6	1	1	0	0			43		32	47	21			1044.16	811.641	1340.53	1060.34	1197.79			456.393		1650.3	2268.21	2299.06			2.9143	2.24992	3.73366	2.9388	3.49033
			0.512987	26.8818	20.423	7.24036	9.84502			34.4962		3.7721	7.67106	9.0535			49	21	9	16	8			16		22	6	87			1278.47	1091.59	1102.49	1505.97	1284.36			1658.04		2730.44	2279.82	2758.75			3.61984	3.09743	3.06041	4.18921	3.6079
			37.3528	10.8286	10.36	2.82236	1.82523			15.7748		8.55995	15.5539	91.3811			1	45	30	11	24			39		14	31	42			1313.67	1106.61	1353.34	1532.42	336.661			1932.07		1576.32	1270.23	519.633			3.81244	3.12585	3.86524	4.39052	1.13354
			5.33783	31.2789	17.9841	50.803	6.27859			10.0672		10.79	3.19551				52	12	14	16	2			33		21	26	15			1959.2	1026.63	2102.58	965.589	1986.96			1139.26		2198.81	2300.15				5.89091	2.97005	5.96927	3.11587	5.77619
			30.9825	6.15868	6.57627	21.8087	4.91551			43.4329		26.2385	42.7657				19	32	51	151	16			16		32	10				1133.43	1505.37	441.521	1032.4	1519.12			968.289		1117.32	1073.48				3.22104	4.22872	1.28178	2.86774	4.29029
			5.79998	4.1474	0.0740466	0	0			37.174		17.9464	43.3788	28.3396			33	12	7	34	8			40		41	48				1858.43	1207.78	302.01	45.0457	1397.91			1211.2		2434.66	1182.51	1414.13			5.2498	3.35986	0.83816	0.166893	4.03716
			12.1361	27.6031	8.50315					33.4584		8.03823	16.9214	21.1079			22	6	1	0	0			41		51	61	48			1687.69	1195.07	672.677					798.241		2112.23	509.404	2355.97			4.80825	3.32805	1.91156
										37.4797		50.3347	23.1881	7.4444			36	29	8					26		24	26	54										1230.32		1113.5	1631.3	1721.62
										24.0445		13.9342	32.8151	22.1749										70		50	48	21										1158.37		1464.68	1697.71	1537.22
										24.1503		2.22253	31.2974	87.1612										24		33	51	40										1381.2		2883.93	1251.8	330.112
		trial#3	8.48869		7.93614	14.4734	7.17196					9.79027	31.6352	1.43168		trial#3								41		12	29	8		trial#3	2358.93		1828.44	1213.31	1394.05					2315.92	1660.76	2935.81		trial#3	6.69		5.13984	3.47631	4.22456
			9.55505		1.99788	16.4307	2.92346			22.7549		14.8153	16.4092	46.9904			24		16	32	14					29	50	8			967.635		2272.76	1373.18	1794.06			1581.25		1576.8	1206.99	1588.13			2.68262		6.37839	3.86988	5.27865
			4.62043			11.3826	13.3716			13.2298		17.0703	4.46048	13.0936			12		4	29	6			38		31	26	71			1471.54			1334.55	1798.7			1949.61		2640.97	2239.81	2228.59			4.6479			3.78054	5.07479
			23.1622		7.80695	50.2221	5.89869			1.57101		10.9874	10.8505	19.7007			10			11	28			25		53	22	24			1815.08		1477.86	883.818	715.69			2165.38		2028.73	2412.53	1260.07			5.06716		4.09771	2.46609	1.9892
			6.26531		18.3362	5.98797	0			24.74		7.74406	9.85563	14.6134			42		22	47	7			11		26	31	25			2098.39		1495.44	1845.6	1332.14			1645.62		2290.89	2868.35	2216.05			5.95927		4.16823	5.32299	3.77997
			0		27.8088	6.06607	1.87517			59.7749		19.2929	34.9806	12.3291			15		30	17	0			33		27	53	38			465.427		1306.96	1471.16	1285.65			738.497		2235.39	1511.61	2633.38			1.29836		3.61917	4.1768	3.58731
			14.6745		3.62663	32.5143	5.50977			3.23655		6.15256	34.6706	8.24723			0		40	22	2			47		49	58	34			1442.67		1865.07	1331.72	1678.89			1445.56		2623.93	1465.12	1338.21			4.00717		5.16609	3.93489	4.66807
			1.15511		16.4121	23.6674	0.398185			7.42291		8.19878	20.1925	13.6218			30		9	39	11			9		24	45	21			2496.86		1386.08	1195.36	2403.08			2718.43		2987.86	2456.89	2064.82			7.44024		3.84447	3.4031	6.6838
			0		6.22895	9.28188	5.65793			37.7583		35.7971		40.8331			2		18	27	2			27		38	62	27			708.368		1377.79	1223.6	1976.02			1217.72		997.416		1138.78			1.99678		4.35016	3.46509	5.59929
			3.83958		5.96595	10.7949	0.0463006					11.9339	12.5208				0		10	25	17			49		32		44			2008.91		1882.82	846.059	2771.92					1344.45	2163.97				5.75336		5.33343	2.36833	7.77673
			41.9766		25.5894	39.3763	7.12103					14.0698	0.0415263	5.90346			8		10	14	1					21	43				1420.83		1252.5	1224.26	2220.15					2794.85	1112.45	2249.48			3.96672		3.49692	3.41664	6.21013
			15.9728		26.4154		19.1268			1.70738		4.03024		8.99554			58		27	43	12					45	1	26			1551.54		1063.89		1222.14			1515.75		1628.72		2071.83			4.57339		2.97074		3.42876
			5.3238		0	5.03887	2.72278			36.3085		30.1087	7.8577	7.57834			26		37		22			4		10		17			1621.37		2322.74	1799.17	1899.85			1220.79		1148.03	1811.7	3413.65			4.48672		6.86852	5.03212	5.67731
			3.20157		1.35022	0.536739	2.29318			13.6128		14.786	52.1155	11.7471			9		0	13	10			15		34	13	40			1498.66		1421.13	1877.64	1399.62			1701.11		1729.74	1044.65	2250.2			4.10474		4.38931	5.21874	3.91278
					9.26132	2.13307	4.36026			2.62817		25.7136	6.59346	7.51852			7		3	1	6			15		20	62	22					1953.8	2088.86	2356.35			2234.09		1682.11	1681.1	2820.89					6.16592	5.91431	6.59972
			1.08894			7.03313	0.628524			2.9243		18.5288	0.350667	3.36815					25	4	5			10		31	18	27			2199.14			1892.05	2099.65			2824.11		1584.15	923.11	1426.46			6.08133			5.27124	5.96821
			0		25.8491	8.46752	1.61491			1.5732		7.2681	10.5938	5.47554			3			16	1			9		41	2	10			576.827		881.431	1289.79	1501.37			2043.93		2650.27	2045.09	2606.91			1.70019		2.51918	3.60589	4.20741
			0.0455415		3.415	2.23024	13.5976					4.34883	8.66473	9.75935			0		26	17	2			10		36	28	15			1404.86		1733.17	2395.07	1588.59					2138.08	1721.33	2290.14			3.83889		5.07511	6.6495	4.43589
			16.0989		14.922	3.53045	0			16.9721		3.73352	6.01209				1		8	8	23					19	17	23			1398.93		1611.48	1887.67	1951.99			1378.37		1615.07	2022.23				3.82267		4.8298	5.24175	5.45317
			16.691			10.3183	5.37997			1.80455		3.03956	28.6116	6.34059			23		32	10	0			20		12	13				1271.29			1619.34	2196.82			2245.56		2216.2	1387.87	2431.58			3.54476			4.62861	6.19775
			11.5721		4.33834	3.32223	2.12246			11.4335		17.4462	8.48521	44.2415			34			28	27			14		11	50	25			1142.49		2031.34	2304.69	2161.21			2155.72		1805.47	2187.01	1365.77			3.3622		5.85449	6.88918	6.28614
			25.9313		7.73942	19.6789	0					25.4684	6.94874	10.7115			15		14	12	9			42		42	32	50			1595.32		2264.75	1239.83	1270.92					1777.27	2378.81	2074.81			4.40425		6.38909	3.49735	3.68431
			0.0774204			5.50157	35.5927					8.86884					39		25	28	0					47	18	40			532.152			1391.29	1717.03					1972.95					1.70924			3.97809	4.81113
			9.36789			6.57505	6.575										1			11	74					28					1704.85			1248.48	1523.71										4.69088			3.49512	4.37172
			5.90823		1.23331	13.2148	1.43858										24			13	12										2296.34		2236.69	1735.62	2100.12										6.59478		6.5035	4.93253	6.03879
			4.14409		0	0.539096	0										18		3	32	3										1468.64		1789.93	3026.95	2137.7										4.37175		5.02266	8.49103	5.97087
			15.9189		18.5877	3.50643	9.92715		trial#4	37.3413	14.6431	20.4668	11.2745	13.6229			6		0	3	0		trial#4	37	47	55	11	43			1445.11		1809.21	2223.72	1344.75		trial#4	1011.24	2990.51	2024.81	483.182	3017.35			4.22458		5.07461	6.18695	3.75622
			9.27444		2.08642	3.47878	1.18499			15.4898	16.6152	22.3042	10.4672	44.149			31		33	11	17			47	35	61	23	20			2201.54		1408.98	1665.18	3316.05			2464.19	1695.06	2087.37	1644.63	698.9			6.7191		4.02311	5.24183	9.61299
			1.22239		2.37852	0.723402	2.87256			3.07664	23.0613	15.8222	27.8523	11.7159			26		8	19	3			14	45	42	32	33			1793.11		2212.16	1960	2445.45			2478.18	1967.01	2106.17	1145.8	2359.5			5.12823		6.22902	5.65403	7.14999
			0		1.53004	2.56647	14.8515			12.1305	33.7234	10.6626	5.54447	1.1971			5		7	2	12			24	30	18	26	1			985.115		2113.71	1502.34	1293.6			1277.46	716.731	1432.29	2499.02	335.387			3.11019		5.91817	4.66921	3.71719
			16.6042		5.61016	0	9.51217			12.5429	12.2886	15.4649	15.5199	17.2142			0		5	4	22			49	45	51	24	61			1012.31		939.906	773.104	1751.21			2425.48	2677.24	2435.13	953.202	3080.42			2.88198		2.63091	2.13808	4.8478
			5.16738		16.7146		0			10.3281	12.1965	10.5187	73.8876	7.44246			20		7	0	15			31	33	45	21	24			1491.62		1493.03		2381.99			2479.17	2205.85	2350.68	448.136	2324			4.59308		4.18191		7.28317
			4.7511		42.7439	4.78275				17.6443	17.7902	17.4276	14.3089	8.0735			19		41		0			54	50	47	22	30			2546.39		1494.31	1808.84				2189.06	2520.68	2412.15	1209.47	3219.42			7.29439		4.18744	5.37938
			8.80085		5.94863	27.3557				13.8449	7.61646	47.7171	8.29583	4.18523			20		50	8				50	26	56	22	17			1664.24		2123.3	1386.46				2117.54	2056.41	1082.53	1549.94	2024.29			5.0054		6.02631	3.83755
			16.7755		5.29488	10.5802	5.00738			9.95509	20.7483	22.1975	1.22489	9.72996			18		15	36				35	77	36	1	30			1223.98		1683.62	1175.95	1962.84			2321.95	2251.2	1436.15	611.133	2354.43			3.5007		4.85746	3.70761	5.45605
			2.58832		2.71235	2.30325	3.85467			12.5568	8.38594	6.4124	11.8684	10.7647			26		11	11	14			31	31	25	16	47			1166.06		1929.19	1848.05	2196.09			1981.09	2770.68	2095.91	1604.38	2983.88			3.7027		5.45397	5.71053	6.2655
										8.47929	37.9717	17.6921	33.6426	4.72346			11		8	9	7			4	89	56	36	21										619.396	1759.69	2327.25	1174.91	2927.08
										9.30868	12.883	15.2236	23.0084	14.1379										25	42	38	28	44										2485.27	2108.97	2347.34	1281.73	2246.22
										9.34441	18.3742	32.5817	22.9939	9.1082										38	32	17	13	35										2474.59	1352.39	797.21	473.221	2106.48
		trial#4	41.0101	28.7041	23.7251	8.40589	1.46741			13.1629	26.044	20.6199	10.9072	14.8942		trial#4								26	35	38	12	44		trial#4	572.248	1377.67	1602.19	1342.32	1866.53			2089.78	1299.97	1462.89	422.718	2563.8		trial#4	1.59354	4.04201	4.52981	3.85156	5.78494
			8.64908	24.7435		8.4522	3.70302			11.3673	10.1197	11.4607	18.8861	13.145			32	57	36	16	9			28	32	16	22	51			847.068	1263.88		3253.41	2045.63			2209.68	1998.75	1469.83	1284.21	2862.43			2.3562	3.53695		9.43312	5.78574
			0.556509	6.98309	3.6873	0.435347	7.79705			29.2674	2.51021	8.31477	14.9285	26.5776			7	35		32	13			45	13	18	37	63			1538.16	1397.33	2002.06	1583.44	2354.9			1127.84	2218.8	1970.47	1603.48	2127.56			4.2925	3.9002	5.93726	4.54212	6.89906
			13.282	2.68509	7.58226	5.5993	7.55325			23.5884	29.4265	19.2465	14.4412	11.7901			2	10	6	1	24			50	62	45	13	30			2267.96	2715.92	1988.73	2027.82	2184.95			1764.44	1746.08	1762.78	642.848	1400.73			6.38981	7.63072	5.78695	5.84424	6.25384
			25.5298	13.1066	0.687618	0	1.38921			3.61899	14.2771	6.12936	35.6681	11.3864			46	10	25	24	22			14	36	7	24	47			1092.2	1620.74	1268.93	344.687	2300.3			1920.05	1816.81	601.951	698.919	3014.86			3.0568	4.57944	3.65394	1.04526	6.53284
			38.5382	13.8553	15.9952	4.52019	4.17683			11.2606	21.1952	10.8064	5.79288	13.2146			33	28	5	0	3			20	57	19	19	31			1031.38	1886.11	1946.44	1904.02	1907.51			1725.39	2422.44	1313.05	2243.62	1982.94			2.87182	5.22845	5.42278	5.54395	5.35041
			12.4612	28.6579	19.5764	54.4229	13.6621			18.4986	20.7405	12.681	16.3631	9.79027			50	32	36	17	11			48	39	10	11	36			2349.24	1466.63	1229.65	1318.93	1934.15			2153.61	1635.84	598.314	871.169	2600.84			6.65478	4.11838	3.42025	3.69705	5.34042
			1.80865	13.9384	3.65038	10.5616	5.17884			12.3788	18.6294	18.0911	12.8746	21.1256			49	60	30	47	39			44	50	46	34	79			1281.2	2290.84	3046.66	198.725	2952.99			2814.93	2630.29	2000.34	2261.8	2512.66			3.58039	6.41327	8.71356	0.656753	8.34379
			33.9007	13.4439	9.44206	4.00724	5.23041			17.3247	9.33092	15.2329	8.12005	19.865			2	46	9	2	22			53	35	13	29	42			1190.7	2385.58	1488.52	1789.52	1762.44			2092.01	2784.4	1018.15	2033.38	1810.33			3.3213	6.6388	4.24467	5.21156	5.35736
			23.4661	3.59553	17.9934	45.5684	5.53843			3.06686	26.2899	24.6102	9.85518	13.6925			51	41	21	10	14			14	25	37	17	51			1706.14	1175.13	1418.96	990.564	2924.97			3151.5	1369.05	906.874	1685.63	2676.2			4.75618	3.30852	3.9678	2.91653	8.775
			2.63414	4.84333	10.3466	32.0999	0.924605			68.8953	23.9978	14.9545	29.0965	26.1275			40	7	30	70	17			21	33	26	39	50			2439.75	2514.43	1908.87	1045.96	2308.21			494.45	1351.26	1506.98	968.175	1796.64			6.87413	7.04909	5.45708	3.11267	6.45559
			1.54431	53.0918	13.6508		3.13262										12	19	25	55	2										1480.99	981.038	1429.33		2122.89										4.27133	2.74734	4.05045		6.10155
			15.2838	1.58081	9.39803	19.5706	4.37307										5	34	23		11										886.961	2390.56	1900.99	1299.42	1786.31										2.5105	7.27771	5.434	3.62878	5.11036
			11.9428	13.0251	6.83535	3.40398	3.65882										23	7	21	30	18										2329.41	1730.03	1739.17	2100.67	2013.6										6.58274	4.94982	4.94058	5.95514	5.84767
				10.0297	10.5241	1.71126	6.68633										29	13	22	10	8											2180.35	1781.65	992.352	2167.88											6.18864	5.04048	2.77954	6.71469
			4.11629	10.9014	11.1173	3.47084	2.46532											27	31	6	22										2620.21	1700.67	1743.99	2896.69	1398.35										7.49104	5.04398	4.96181	8.58399	4.26377
			10.7291	35.0413	8.42949	6.67811	0.594443										12	42	23	15	7										3140.28	1468.58	1310.28	1263.7	2140.58										9.1347	4.1123	3.68536	3.58412	6.16686
			16.7236	14.6527	12.9709	13.2078	7.21165										23	43	17	18	1										1029.18	2480.03	1836.29	1096.91	2024.24										2.86569	6.93095	5.22689	3.07098	5.61812
			7.60037	2.72188	21.0019	5.95464	0										27	44	32	33	19										1644.29	1968.49	2315.39	2113.89	1026.94										4.57526	5.49571	6.46084	5.88903	2.84099
			10.4476	7.23361	3.89267	1.40982	7.48813										9	11	60	13	0										2328.07	2142.45	2318.75	2134.76	2243.15										6.81974	6.14302	6.49563	6.13359	6.37411
			4.7808	3.25049	4.04097	8.60734	14.6923										46	27	15	5	12										2253.45	1599.39	474.379	2070.98	1899.13										6.56617	5.03348	1.34131	5.88322	5.48337
			7.40194	26.0456	10.8114	6.25783	3.53901										20	12	8	27	37										2100.09	1660.32	1801.93	1668.53	2160.85										6.08234	4.69481	5.02038	5.33223	6.23544
			30.4845	7.3959	2.00658	11.2647	4.19335										30	56	27	35	10										1370.76	2083.3	2297.6	1239.7	1815.6										3.83139	5.92298	6.43757	3.71894	5.07975
			7.12044	4.20106	0	9.85021	7.06419										38	18	5	22	10										1435.34	1501.31	1911.14	1893.68	2230.52										4.08039	6.49994	5.4214	5.44847	6.71274
					11.7516	8.73894	3.03577										21	8	0	32	19												2616.87	2055.8	2088.22												7.30146	5.80054	6.27411
						31.2555	3.54019												42	19	7													821.686	1985.43													2.28149	5.98538
					13.7968	28.5046	0													32	11												1435	1431.71													4.11594	4.04591
					6.5668	42.7453	14.6143												24	51	0												1361.57	1105.55	1838.29												4.0658	3.08022	5.39397
					13.5	33.747	9.15359												15	38	34												1361.28	964.651	2010.95												4.08121	2.67906	5.91073
					0.125215	6.00195	12.2403												23	29	3												1007.69	1995.9	1886.38												2.80312	5.62544	5.35321
					10.9632	16.635	1.69184												2	18	24												1847.72	1471.45	2144.36												5.15734	4.09016	6.39566
					6.28391	1.69963	2.43417												38	14	11												1487.04	2607	1919.98												4.26009	7.25774	5.59749
					7.61953	1.82467	17.34												14	7	7												2128.48	373.974	1266.42												6.496	1.05068	4.03879
					4.40569	3.28347	0												24	3	32												1485.44	1938.47	1733.78												4.34755	5.53356	5.99284
					4.24338														8	16	0												2167.82														6.47884
					8.62589	7.61821	2.10098												14														2174.27	1786.14	1721.95												6.58313	4.97551	5.24915
																			24	23	4
