# Supplementary material for: Lifelong regeneration of cerebellar Purkinje cells after induced cell ablation in zebrafish
Source: eLife. 2023 Apr 12;12:e79672. doi: 10.7554/eLife.79672 (PMC10147380; doi:10.7554/eLife.79672)
Supplement: Figure 6—figure supplement 1—source data 1. [file elife-79672-fig6-figsupp1-data1.xlsx]

## Sheet: Hoja1
			Supplem. Fig. 12B	maximum intensity RFP fluorescence			(Endox=PC-ablated, DMSO=control)
			Before treatment	DMSO 2wpt	Endox 2wpt	DMSO 4mpt	Endox 4mpt	DMSO 1ypt	Endox 1ypt
			3200	2589	432	2426	1617	2663	1599
			2930	2124	500	2395	1553	3456	1943
			2455	1622	387	2217	1204	3457	2180
			2250	2635	529	2415	1163	3698	1691
			2151	2871	605	2239	1710	2301	2156
			2280	2640	536			2544	1380
			2776	2823	486			2817	1991
			2562	2497	493			1688
			2906	2909	503			3768
			2906	2460	599
			2395		675
					426
					500
					437
					478
					448
					407
					460
					550
			Supplem. Fig. 12C	area PC layer (µmE2, in vivo imaging-whole mount cerebellum)					(Endox=PC-ablated, DMSO=control)
			DMSO-2wpt	Endox-2wpt	DMSO 4mpt	Endox 4mpt	DMSO 1ypt	Endox 1ypt
			519478	237776	654557	426999	659524	402247
			447343	217627	615272	283697	792610	449568
			502510	215635	858686	374287	808134	420593
				103513	679596	355723	786388	415577
				217758	748874	299281	661061	417490
								369239
								367750
			Supplem. Fig. 12D	body size (cm)		(Endox=PC-ablated, DMSO=control)
			DMSO-2wpt	Endox-2wpt	DMSO 4mpt	Endox 4mpt	DMSO 1ypt	Endox 1ypt
			2.5	2.6	2.3	2.4	3.5	3.7
			2.5	2.4	2.4	2.3	3.3	3.6
			2.45	2.5	2.8	2.7	3.8	3.6
			2.7	2.6	2.5	2.75	3.6	3.4
			2.7	2.6	2.3	2.3	3.7	3.7
							3.6	3.7
							3.7	3.6
							3.6
			Supplem. Fig. 12E	mean swimming speed (cm/sec, novel tank test)			(Endox=PC-ablated, DMSO=control)
			Endox 12dpt	DMSO 12dpt	Endox 4mpt	DMSO 4mpt	Endox 1ypt	DMSO 1ypt
			4.51252	3.94558	4.62274	4.22335	6.56323	6.46903
			5.68292	4.31447	4.97024	3.71874	4.9016	5.8197
			4.88059	4.3278	3.98374	4.5778	5.63776	5.09884
			4.14094	4.65864	5.55381	4.21502	6.14246	4.08202
			4.81196	4.23512	6.39425	4.25823	4.16583	4.06859
			3.92262	4.08094	3.78275	4.79963	2.74035	3.57374
			4.54323	3.46862	4.43584	4.08538	2.41821	4.34307
			4.85788	4.60558	4.50251	4.48015		5.47024
			4.34217	6.59484	3.03553	5.26033		5.31246
			6.09112	1.13586	2.99749	5.6558
				4.18099	4.81291	7.17664
					5.2179	5.57861
					4.01824	5.07963
					3.36511	3.93927
			Supplem. Fig. 12E	total distance (cm, novel tank test)			(Endox=PC-ablated, DMSO=control)
			Endox 12dpt	DMSO 12dpt	Endox 4mpt	DMSO 4mpt	Endox 1ypt	DMSO 1ypt
			1612.23	1329.66	1709.32	1607.25	2365.36	2331.2
			2018.35	2325.67	1835.82	1380.88	1770.12	2100.31
			1746.47	1559.74	1472.11	1694.23	2036.15	1841.51
			1495.71	1669.28	2024.71	1604.08	2221.3	1474.28
			1725.57	1534.13	2329.19	1575.81	1504.55	1469.42
			1403.36	1481.87	1415.11	1774.41	989.349	1290.7
			1602.67	1406.74	1639.62	1539.35	873.128	1568.41
			1756.22	1661.32	1626.44	1655.85		1976.92
			1560.4	2585.7	1183.14	1944.2		1918.49
			2203.04	411.319	1084.88	2089.61
				1513.18	1801.94	2638.83
					1925.38	2056.81
					1505.75	1879.78
					1238.57	1428.1
