# Supplementary material for: Lifelong regeneration of cerebellar Purkinje cells after induced cell ablation in zebrafish
Source: eLife. 2023 Apr 12;12:e79672. doi: 10.7554/eLife.79672 (PMC10147380; doi:10.7554/eLife.79672)
Supplement: Figure 7—figure supplement 1—source data 1. [file elife-79672-fig7-figsupp1-data1.xlsx]

## Sheet: Hoja1
		Supplem. Fig. 15B, C	% PCs/areas corpus cerebelli - 2wpt			(Endox=PC-ablated, DMSO=control)								Supplem. Fig. 15D	diameter PC soma 2wpt		(Endox=PC-ablated, DMSO=control)				Supplem. Fig. 15D	diameter PC soma 4mpt		(Endox=PC-ablated, DMSO=control)				Supplem. Fig. 15D	diameter PC soma 1ypt		(Endox=PC-ablated, DMSO=control)
		area-1 Endox	area-1 DMSO	area-2 Endox	area-2 DMSO	area-3 Endox	area-3 DMSO	area-A Endox	area-A DMSO	area-B Endox	area-B DMSO			area-A End	area-A DMSO	area-B End	area-B DMSO				area-A End	area-A DMSO	area-B End	area-B DMSO				area-A End	area-A DMSO	area-B End	area-B DMSO
		11.3208	32.1855	59.7484	39.1185	28.9308	28.696	25.1572	51.6988	74.8428	48.3012			10.668	14.33	13.396	12.096				11.496	11.18	20.236	11.388				13.418	14.209	13.719	17.014
		6.17978	28.7811	50	45.1512	43.8202	26.0676	13.4832	52.1797	86.5169	47.8203			10.628	10.707	11.413	9.117				10.317	10.159	15.256	6.447				10.848	14.25	15.22	13.717
		15.9292	27.7976	55.7522	43.5139	28.3186	28.6885	32.7434	50.1782	67.2566	49.8218			10.229	9.577	9.366	7.072				11.833	10.761	9.718	8.501				8.716	11.832	9.996	13.675
		3.5	31.0448	55.5	39.7015	41	29.2537	13.5	50.3198	86.5	49.6802			11.004	11.494	9.495	6.908				11.953	11.791	14.591	7.721				13.072	12.697	10.561	13.543
		5.76923	29.8595	53.3654	39.1686	40.8654	30.9719	21.6346	51.9321	78.3654	48.0679			9.351	12.725	8.021	6.622				13.375	9.77	11.346	13.336				13.546	12.078	11.39	13.184
														8.303	11.159	9.637	7.192				13.165	14.629	13.986	13.125				13.055	11.024	10.527	12.208
														9.373	13.591	10.767	10.332				12.701	11.881	10.157	9.651				17.222	13.037	10.775	11.881
		Supplem. Fig. 15B, C	% PCs/areas corpus cerebelli - 4mpt			(Endox=PC-ablated, DMSO=control)								13.962	13.717	11.459	9.117				17.056	11.357	13.407	7.543				14.848	12.325	17.054	12.231
														13.96	10.66	8.172	9.242				9.143	10.628	13.524	9.884				15.978	12.452	12.54	13.119
		area-1 Endox	area-1 DMSO	area-2 Endox	area-2 DMSO	area-3 Endox	area-3 DMSO	area-A Endox	area-A DMSO	area-B Endox	area-B DMSO			12.585	11.971	12.533	10.298				11.04	12.5	13.863	9.465				6.826	10.193	15.163	14.627
		6.25	28.5072	59.5109	38.5422	34.2391	32.9506	18.5286	49.7254	81.4714	50.2746			11.957	7.986	11.084	12.208				12.902	11.171	15.35	9.85				5.628	12.096	8.716	12.921
		9.50872	27.2328	59.271	40.9956	31.2203	31.7716	29.3185	48.9751	70.6815	51.0249			10.921	12.031	6.857	8.805				10.903	8.72	15.049	6.469				7.351	12.4	8.634	12.959
		5.80357	29.5899	52.2321	38.2572	41.9643	32.1528	15.1786	50.3262	84.8214	49.6738			13.039	11.581	12.325	9.117				11.809	11.775	14.394	7.951				10.103	12.725	13.677	11.185
		13.1707	26.5174	57.8049	38.1261	29.0244	35.3565	30.8537	45.1974	69.1463	54.8026			11.358	10.76	12.77	8.974				13.697	11.027	16.042	11.588				7.951	8.465	15.002	11.79
		11.2291	32.4393	62.0637	30.0101	26.7071	37.5506	29.5903	47.7227	70.4097	52.2773			9.675	10.001	14.39	9.148				10.811	9.843	17.454	9.164				12.699	12.208	10.527	13.57
														14.509	8.649	12.725	11.255				12.791	10.363	16.858	7.619				11.459	14.975	11.365	10.193
														7.233	10.984	11.857	8.74				10.988	12.003	13.986	6.773				14.05	9.494	10.98	7.282
		Supplem. Fig. 15B, C	% PCs/areas corpus cerebelli - 1ypt			(Endox=PC-ablated, DMSO=control)								7.143	12.078	13.724	8.862				13.273	11.677	12.031	6.436				15.163	7.804	12.074	7.804
														8.633	9.842	10.396	9.871				11.645	9.512	15.424	7.272				10.396	7.795	9.374	10.76
		area-1 Endox	area-1 DMSO	area-2 Endox	area-2 DMSO	area-3 Endox	area-3 DMSO	area-A Endox	area-A DMSO	area-B Endox	area-B DMSO			10.606	11.513	10.628	8.632				11.346	7.874	14.249	8.508				13.782	9.871	11.212	9.464
		7.06767	28.611	57.594	34.5178	35.3383	36.8713	24.5113	46.3775	75.4887	53.6225			9.496	12.12	10.721	10.415				13.273	11.446	15.129	8.716				15.578	14.144	12.333	12.725
		14.6535	26.0391	58.4158	35.353	26.9307	38.6079	27.5248	44.667	72.4753	55.333			11.437	12.4	16.813	9.769				10.645	11.769	15.585	9.156				12.286	10.158	10.775	11.735
		16.5794	27.2888	59.6859	35.7354	23.7347	36.9758	29.6684	46.1311	70.3316	53.8689			12.608	8.715	8.805	8.829				10.171	7.986	10.811	8.031				13.963	11.363	11.834	8.337
		11.7264	36.38	58.3062	34.1551	29.9674	29.4648	28.3388	55.8028	71.6612	44.1972			6.826	9.372	9.465	7.272				10.831	11.11	13.55	7.143				18.74	10.66	13.224	14.27
		7.73196	25.7781	54.3814	35.724	37.8866	38.498	20.8763	39.0392	79.1237	60.9608			9.909	8.337	9.311	8.507				10.143	9.452	15.256	8.031				16.072	8.101	12.222	13.628
														13.077	11.344	7.458	7.58				13.122	9.231	10.751	9.577				11.792	10.332	10.417	10.984
														11.038	8.362	10.194	7.721				12.48	10.168	10.591	7.721				5.986	15.745	10.445	11.024
														12.315	10.158	10.024	7.142				11.54	10.146	12.12	9.494				21.231	10.76	18.082	6.446
														9.873	12.809	8.806	9.464				14.488	11.751	9.197	5.914				15.41	10.606	13.714	12.691
														11.006	9.117	9.909	8.405				12.858	11.038	13.759	7.113				11.539	10.599	11.889	11.024
														15.262	14.27	12.602	9.403				12.19	10.118	12.031	9.28				16.071	16.061	13.514	10.001
														13.338	11.388	10.709	8.189				10.988	11.185	17.115	10.396				13.185	12.325	12.517	11.686
														7.043	9.486	11.187	11.778				17.77	8.641	11.397	10.518				16.918	11.236	15.906	11.753
														13.572	7.35	9.909	8.101				15.722	14.136	17.958	10.607				13.336	8.362	10.547	12.025
														12.534	11.363	9.829	7.986				14.394	12.772	14.591	8.604				12.772	11.14	11.058	11.692
														12.488	9.35	14.029	9.164				13.273	8.716	17.181	9.102				12.221	9.651	9.675	14.189
														9.909	8.837	10.628	8.189				12.468	8.021	16.232	8.806				11.357	12.025	13.17	13.037
														14.232	10.707	13.651	7.986				12.701	6.74	9.458	8.337				8.998	11.692	21.478	10.899
														10.472	9.937	12.122	7.58				12.382	8.268	12.565	8.83				13.655	15.26	8.839	11.881
														13.719	9.471	13.445	8.934				12.633	9.829	11.869	10.979				12.208	12.114	7.666	6.104
														9.697	12.208	9.496	8.337				9.806	11.057	14.189	10.002				17.858	10.101	10.842	14.088
														11.755	7.457	13.921	7.571				18.351	10.395	12.707	11.294				11.973	11.444	13.482	11.581
														10.707	9.486	8.032	7.986				17.633	10.628	13.407	7.543				9.652	10.395	11.084	12.22
														6.825	13.249	9.465	8.048				14.229	5.512	18.476	8.975				17.432	10.498	14.703	8.048
														7.351	8.172	11.39	10.443				11.521	9.488	13.863	8.338				12.419	11.581	9.488	11.887
															11.832	12.856	5.766				18.148	10.417	15.772	8.83				15.92	8.715	15.154	15.028
															9.651	11.006	7.495				13.203	10.285	15.162	9.366				11.889	10.332	13.397	9.242
														12.487	13.026	13.482	8.03				16.606	8.975	17.244	9.101				17.616	11.037	20.668	9.871
														14.49	11.363	12.878	10.395				9.828	13.9	17.14	8.19				12.137	14.783	11.664	10.606
														12.921	11.024	11.459	8.405				10.086	11.533	13.55	7.959				10.417	11.363	11.694	10.415
														11.134	11.881	14.766	8.934				11.565	9.828	14.742	9.652				9.909	9.117	13.055	14.464
														14.385	11.037	10.709	7.35				13.65	9.995	15.092	4.559				11.363	14.932	12.772	11.21
														10.229	8.934	9.366	8.101				13.142	9.703	6.687	10.333				13.009	10.714	11.583	11.133
														9.555	6.446	8.508	8.302				8.022	7.666	14.443	13.883				5.766	14.39	14.615	11.363
														9.28	9.673	8.634	7.282				11.686	8.508	7.446	4.621				11.186	8.092	13.039	11.513
														8.998	11.134	9.96	6.243				10.986	10.06	8.29	10.229				9.311	11.85	11.006	13.965
														9.117	9.486	10.669	7.904				13.142	12.331	6.234	10.187				13.53	12.137	17.6	11.004
														4.164	9.101	9.822	8.91				13.141	10.821	9.563	14.012				6.448	13.271	13.273	12.137
														8.837	12.167	7.805	8.837				14.136	10.775	12.93	11.755				3.786	12.231	11.212	14.489
														12.4	9.82	7.805	8.154				13.386	12.12	8.921	11.881				9.488	12.606	10.98	9.936
														14.432	7.893	8.049	9.471				14.365	7.619	12.19	10.002				9.118	13.717	8.407	12.452
														10.444	10.707	7.987	9.733				18.213	8.839	10.988	12.361				13.07	10.599	8.304	10.84
														12.602	11.004	8.049	7.543				17.172	9.117	13.235	17.016				12.515	11.363	10.472	13.929
														13.572	11.134	10.98	7.804				15.229	8.466	8.16	15.332				14.417	9.85	11.135	9.994
														12.233	6.949	11.038	8.465				15.206	9.212	10.824	7.204				15.33	8.998	10.52	9.871
														11.237	6.98	8.741	8.805				15.073	8.19	12.031	9.937				11.514	9.464	13.077	8.707
														13.544	9.871	9.087	9.673				14.232	11.038	11.34	13.142				16.728	11.037	11.384	10.84
														14.136	11.457	12.314	10.395				13.338	9.117	9.351	11.025				13.512	8.641	9.653	9.871
														10.194	10.298	11.365	8.837					11.384	10.143	10.927				10.341	11.242	11.346	9.908
														14.766	11.082	10.08	6.469					8.998	10.143	14.731				17.402	11.952	14.467	13.378
														15.851	8.507	9.703	8.829					8.508	8.628	8.19				15.761	11.953	10.299	9.494
														17.12	10.707	9.994	9.494				17.469	9.703	10.509	11.358				20.164	11.457	13.251	10.76
														9.149	10.707	10.607	9.471				14.189	10.193	7.598	10.842				12.192	11.557	4.233	10.249
														14.491	9.842	9.674	9.842				18.459	10.688	9.143	8.466				8.338	9.82	14.055	11.185
															11.971	8.935	9.651				12.517	9.873	7.427	7.232				10.249	9.636	11.515	11.971
															11.082	8.362	8.837				15.453	7.58	7.947	10.499				14.745	9.936	12.586	12.377
														12.699	12.635	7.665	7.904				17.3	9.211	11.565	13.649				25.071	12.36	13.649	9.584
														12.314	9.211	8.716	9.958				14.725	9.373	12.342	7.233				19.066	11.185	13.338	10.193
														14.629	10.395	9.96	9.486				11.686	8.508	13.94	12.326				14.146	12.584	14.745	11.242
														11.025	7.142	12.374	6.611				18.461	8.128	8.857	9.095				16.494	8.74	16.071	11.133
														13.25	8.998	7.805	10.298				13.961	11.024	9.103	12.137				14.842	11.662	11.005	10.76
														9.464	12.72	11.495	11.382				14.875	10.847	8.553	12.608				16.594	5.38	13.011	10.66
														11.237	13.184	13.25	12.19				19.425	7.619	10.213	11.852				12.585	14.763	11.135	9.828
														10.444	6.824	9.851	11.056				14.784	10.249	9.103	8.269				13.962	10.228	9.496	10.687
														9.994	11.024	11.459	7.112				16.661	9.373	11.04	11.887				12.811	13.591	11.294	10.284
														8.993	10.667	10.828	10.158				12.192	9.733	10.691	9.908				12.098	7.272	6.74	10.415
														11.792	9.155	11.363	11.004				12.5	7.986	11.04	9.697				14.144	10.47	15.893	8.91
														13.17	10.714	10.848	9.958				13.245	10.444	12.102	12.871				19.98	12.532	13.967	8.974
														16.119	9.577	8.642	6.513				13.675	11.589	6.153	8.406				11.256	9.936	14.049	14.819
														9.118	12.601	9.533	6.697				10.159	11.185	8.824	8.716				19.023	6.908	11.827	10.657
														9.465	7.656	10.842	5.678				12.721	12.877	9.622	8.83				14.727	16.069	10.193	8.715
														8.141	8.632	12.878	10.415				12.12	8.329	9.197	11.005				14.226	15.608	14.846	9.313
														12.706	11.178	10.709	8.101				10.334	9.77	9.351	9.465				14.226	14.744	10.341	11.767
														9.481	8.91	10.608	9.28				15.541	8.032	7.598	9.578				13.141	15.447	8.569	11.092
														9.135	13.222	9.28	9.148				12.861	7.042	11.736	12.454				17.166	12.809	9.843	11.271
														13.409	10.518	8.465	11.134				14.39	8.863	19.204	7.823				11.357	5.985	9.373	18.204
														10.355	9.651	9.653	9.365				5.628	7.572	9.389	6.815				16.734	12.691	8.303	13.779
														11.363	8.74	10.761	10.774				17.24	5.513	9.622	8.65				10.172	8.74	12.849	14.509
														12.699	10.774	7.35	10.339				12.699	10.194	13.66	13.224				13.528	12.691	10.444	13.734
														11.761	10.08	14.843	8.632				12.192	4.744	11.839	7.796				15.151	13.124	13.781	13.065
														13.759	9.871	9.937	6.535				16.698	7.072	10.651	10.285				12.048	11.255	12.263	19.678
														14.287	9.828	10.708	14.144				14.009	9.117	10.065	10.98				14.083	14.875	9.923	10.881
														14.915	8.596	9.03	11.037				13.883	6.469	12.52	10.547				11.185	12.72	12.585	13.229
														13.245	9.486	6.709	12.208				12.854	6.105	10.824	9.873				15.59	11.759	14.287	11.971
														14.807	8.507	12.233	12.19				14.999	11.256	9.143	9.13				13.717	9.242	12.693	13.098
														10.187	8.837	10.608	11.363				17.858	10.98	11.645	11.142				13.427	8.092	6.857	10.626
														11.365	9.164	8.864	14.841				17.798	7.233	7.532	11.39				17.45	12.854	11.779	14.068
														12.54	9.703	13.963	11.557				11.663	10.024	8.727	10.249				13.898	15.236	15.411	14.285
														15.609	8.715	13.677	11.037				7.571	10.251	9.143	12.192				18.095	12.36	13.12	16.172
														8.633	8.707	11.852	9.651				11.851	8.999	8.628	9.908				13.314	15.218	15.152	13.244
														9.35	11.826	12.327	9.769				11.18	7.618	10.903	9.117				14.39	12.544	15.314	15.372
														11.384	10.707	12.169	9.842				12.098	11.539	13.316	5.878				18.84	19.949	11.972	11.778
														11.832	8.101	11.761	9.577				15.26	10.08	12.752	6.708				17.039	10.774	13.011	13.222
															9.242	9.243	12.959				11.057	10.84	9.857	7.143				10.687	12.4	10.499	9.584
															7.35	13.208	13.883				12.114	6.301	7.271	10.186				12.072	10.606	13.428	11.082
														14.568	9.871	12.327	7.904				16.067	11.972	7.222	10.92				15.745	12.854	12.95	11.778
														11.857	7.804	9.118	11.686				13.655	13.418	8.62	15.924				12.096	12.697	13.053	15.465
														11.18	10.228	12.873	15.534				12.326	14.23	12.173	13.07				14.7	8.048	12.026	13.48
														12.032	10.606	16.063	11.851				13.337	12.861	11.371	9.842				12.096	9.85	7.572	12.809
														14.392	6.824	14.727	13.779				9.652	10.525	7.222	10.334				12.584	11.185	15.541	11.185
														9.704	7.804	14.009	6.435				12.233	11.761	11.833	7.878				14.494	12.031	15.218	12.948
														8.258	7.959	15.314	10.332				14.407	13.677	10.283	11.243				10.228	13.053	15.414	10.518
														8.998	9.372	10.194	8.465				11.357	12.073	9.857	8.406				17.646	13.416	12.602	10.606
														10.545	10.158	11.59	7.609				11.971	13.038	8.036	10.002				15.26	15.917	16.646	13.378
														11.459	10.332	15.244	14.725				12.699	12.923	8.116	8.634				14.047	12.725	13.445	7.232
														12.721	8.715	9.351	9.532				12.049	13.244	11.669	11.179				14.365	17.856	11.973	8.829
														11.384	9.211	8.129	8.337				15.152	12.327	11.645	8.839				12.809	12.417	10.194	9.372
														7.987	9.35	11.533	13.96				12.317	14.39	9.987	8.911				17.952	11.532	13.395	10.298
														12.073	8.934	12.811	8.74				15.374	11.761	12.497	11.973				12.4	18.174	11.256	8.87
														10.92	9.311	11.614	13.649				17.34	8.998	9.197	9.533				12.096	11.741	11.257	12.498
														9.164	10.101	11.663	15.686				12.025	10.417	8.702	11.459				13.543	8.465	9.118	9.828
														11.179	10.525	12.36	11.612				18.903	11.663	7.947	9.85				20.152	15.649	15.073	15.59
														9.844	8.707	9.555	13.427				11.693	11.212	8.494	10.193				18.095	13.335	13.224	12.584
														10.927	8.582	5.986	9.117				15.077	17.336	14.601	10.249				13.57	15.594	14.877	14.047
														11.589	8.311	10.334	9.673				13.528	10.395	13.359	10.707				11.85	8.632	12.221	12.417
														12.722	10.72	12.209	10.298				14.544	10.002	10.691	10.9				15.26	12.208	12.878	12.36
														12.862	9.733	13.885	11.134				14.846	10.519	9.57	7.805				15.576	9.936	14.392	8.829
														17.999	8.337	8.633	11.14				15.759	9.653	8.393	9.586				10.626	8.189	13.409	9.372
														11.883	9.769	7.571	13.026				13.337	11.169	12.616	8.044				11.382	15.33	15.746	9.365
															10.76	11.025	14.489				16.174	10.48	9.518	8.83				12.544	13.649	12.208	10.606
															8.649	10.081	8.837				16.764	14.323	11.742	10.827				12.635	10.687	11.775	11.344
														16.071	14.251	14.407	17.63				11.459	12.293	9.45	11.006				13.649	7.041	14.517	12.948
														12.877	11.834	14.703	12.848				12.872	11.662	7.71	9.212				10.707	11.662	11.603	12.871
														11.583	11.612	14.495	11.178				11.243	16.097	8.62	12.12				12.546	11.953	15.45	11.242
														9.652	9.995	8.583	13.96				13.899	13.208	9.54	9.873				11.938	11.082	11.201	12.86
														9.652	10.187	10.662	15.236				12.985	13.026	11.22	8.364				12.584	12.921	11.603	8.465
														8.87	12.221	13.782	10.707				13.958	14.175	14.169	10.221				11.296	12.691	10.344	12.36
														11.557	10.186	11.791	12.937				11.553	14.211	12.307	10.707				13.47	15.26	10.059	12.532
														8.782	9.96	8.974	11.236				10.986	15.467	12.334	7.204				11.552	8.189	13.718	9.156
														10.193	11.743	14.914	10.193				12.586	12.811	14.703	10.56				10.881	12.532	9.733	15.608
														8.311	13.12	10.761	12.284				13.759	14.392	9.205	13.719				11.85	12.325	10.518	10.332
														10.194	15.22	14.082	14.937				4.926	12.326	15.512	8.998				17.014	10.847	10.601	13.717
														13.545	9.96	10.761	12.532				10.581	12.331	14.891	14.565				12.607	7.182	10.981	11.024
														13.764	10.92	13.818	13.919				12.117	8.935	13.396	9.117				14.784	8.582	13.839	12.876
														12.192	7.665	11.755	13.512				10.616	10.986	12.102	12.876				13.126	10.193	8.219	11.444
														14.565	15.317	10.547	18.174				10.921	10.628	11.04	11.532				14.39	22.357	8.502	9.365
														13.717	14.136	7.283	16.069				11.185	13.294	6.898	12.326				12.86	12.331	9.949	9.464
														9.149	10.334	13.185	13.717				11.846	13.294	9.689	17.432				13.517	13.528	8.518	13.443
														8.994	11.006	9.873	9.651				12.515	8.83	12.202	13.055				12.032	12.544	8.551	11.538
														9.242	9.533	5.46	9.311				12.918	11.037	6.336	13.007				12.379	14.405	12.363	12.584
														6.11	8.839	10.101	11.851				8.364	11.539	8.591	8.716				15.076	11.356	7.763	8.507
														16.256	10.251	12.169	19.439				8.246	14.465	8.284	8.383				13.077	10.76	8.466	5.628
														14.466	9.118	13.719	12.096				12.258	10.92	10.277	11.111				12.894	10.498	9.611	9.85
														12.949	9.157		8.101				12.283	11.457	10.16	10.377					13.543	11.436	11.024
														11.365	8.716		12.325				15.754	14.49	13.778	8.621					6.18	7.438	12.486
														11.612	13.38	20.191	8.741				13.68	13.294	7.439	11.186					12.893	10.223	6.96
														17.22	10.92	13.863	6.612				17.119	14.391	7.426	11.769				16.728	17.219	6.436	9.908
														12.894	9.085	13.293	7.143				12.486	12.191	10.017	11.652				13.677	14.975	8.466	8.91
														12.402	11.057	9.465	7.768				14.285	12.032	9.452	14.388				17.108	14.841	14.008	7.202
														12.86	10.926	6.825	6.96				6.611	11.257	10.651	10.828				18.795	13.512	16.066	7.282
														10.194	10.023	7.986	7.572				14.783	8.022	9.003	10.575				13.714	12.231	11.761	9.828
														10.662	11.255	11.363	9.03				12.208	10.519	11.773	10.717				17.958	15.26	14.785	8.91
														10.927	12.856	10.332	8.405				9.769	13.077	8.041	8.633				13.418	11.242	16.258	6.824
														9.118	14.899	11.211	8.566				13.119	8.583	11.75	7.383				14.978	11.236	10.662	8.302
														12.169	10.92	11.832	8.102				13.416	12.637	6.814	8.33				16.606	12.498	14.627	10.84
														11.135	11.533	10.395	9.35				11.759	10.521	8.82	10.797				18.52	12.652	17.539	7.986
														12.419	14.008	11.754	9.156				11.388	9.157	7.094	9.143				17.741	10.899	16.172	10.023
														12.584	13.12	9.703	10.299				13.119	11.39	10.601	8.668				12.499	10.707	14.49	12.854
														15.904	10.545	12.025	7.272				11.363	8.406	11.379	9.398				10.23	10.606	8.871	11.178
														15.562	10.002	9.093	7.202				11.759	11.237	6.171	10.002				13.682	8.465	13.38	10.47
														13.251	13.816	12.36	6.436				13.888	14.225	13.655	9.37				18.769	16.083	11.211	12.12
															10.662	10.707	7.113				15.414	12.361	11.571	8.929				11.779	11.513	8.541	8.74
															12.727	10.395	4.559				11.662	12.585	14.468	8.219				15.924	9.842	10.667	8.74
															11.004	13.816	5.792				11.881	11.237	10.988	9.136				15.374	12.544	9.465	7.804
															9.148	10.526	6.436				12.36	10.848	13.364	12.046				13.251	10.158	13.142	7.272
															15.977	12.355	9.829				10.298	12.36	15.181	10.06				12.12	11.79	9.243	9.093
															9.095	9.243	6.96				9.164	10.229	12.514	10.896				16.311	8.54	16.968	8.998
															9.822	9.652	9.165				10.249	11.761	17.433	8.406				16.81	10.66	11.688	7.457
															7.805	11.388	7.805				13.124	9.873	16.309	8.725				15.917	14.913	12.098	9.211
															5.877	13.649	10.9				10.158	9.312	13.053	11.358				20.375	8.337	19.339	9.696
															6.772	11.024	6.981				12.377	12.209	15.973	9.26				14.209	11.513	12.602	11.832
															12.121	12.127	11.057				10.228	10.471	9.697	7.98				15.442	11.735	12.811	7.795
															12.811	11.854	9.366					10.707	13.223	6.448				14.783	13.037	13.544	11.004
															8.634	15.073	8.303					9.351	12.169	6.015				17.302	10.66	12.849	5.985
															9.28	9.149	8.715					10.341	9.937	9.73				13.335	9.471	17.959	10.626
															9.118	13.338	7.233				15.128	11.211	9.164	6.604				9.732	11.056	15.163	14.768
															9.843	10.334	6.536				14.702	12.691	7.457	8.93				9.703	13.591	14.568	9.936
															9.218	12.584	8.863				9.344	12.607	12.192	10.103				14.134	10.058	8.741	12.36
															10.285	13.009	12.534				13.591	11.037	15.779	8.459				12.119	12.871	13.714	8.337
															8.634	12.137	6.981				17.305	9.404	9.494	8.408				10.687	9.554	17.142	12.137
															7.073	10.707	6.772				19.343	11.212	13.294	7.989				17.302	10.298	17.504	8.974
															11.212	14.365	9.351				18.062	9.157	8.999	7.852				13.919	14.047	14.43	8.74
															8.508	6.163	11.18				16.494	10.09	11.179	7.044				17.035	10.415	8.741	8.337
															8.466	13.651	6.95				18.764	10.471	11.588	9.931				8.829	9.958	11.737	10.298
															11.557	9.842	7.194				13.718	12.326	9.118	9.937				15.809	14.225	18.795	11.082
															11.614	11.459	10.159				13.654	11.18	7.722	5.757				11.056	10.172	11.852	12.72
															8.093	13.718	5.3				13.062	11.581	10.56	11.175				14.25	6.116	9.938	12.167
															8.303	10.715	9.243				13.04	7.467	15.447	10.581				12.937	12.36	8.707	11.382
															8.407	13.719	9.212				16.303	10.92	7.458	11.515				10.525	12.208	9.994	12.4
															9.149	12.921	9.095				12.505	6.856	15.144	11.363				14.509	10.395	9.822	11.037
															7.619	12.725	9.844				12.239	12.12	15.608	11.446				11.037	10.395	10.25	13.037
															12.499	13.961	7.184				9.99	8.302	9.533	10.828				12.208	7.232	11.557	11.753
															6.981	8.542	7.796				12.095	8.507	10.299	9.495				13.443	9.494	10.101	9.372
															8.634	11.761	10.299				10.815	8.871	13.384	10.472				15.795	8.862	10.927	10.919
															11.365	11.532	8.154				11.345	10.545	11.037	8.863				14.209	11.662	7.233	8.302
															9.118	11.558	8.839				10.417	9.404	7.805	12.586				12.937	7.904	11.037	8.78
															9.488	13.649	9.844				11.038	8.806	8.154	11.446				13.244	11.14	10.332	9.218
															13.208	11.237	8.566				12.258	11.082	12.602	11.791				15.465	9.486	9.312	11.832
															8.362	8.633	8.154				12.311	9.637	16.204	8.406				11.759	8.362	11.882	12.584
															8.863	10.526	9.494				13.913	10.229	12.772	9.404				21.66	9.156	8.542	14.975
															11.759	12.653	8.406				9.465	9.555	12.653	8.407				16.383	8.715	8.999	10.228
															5.051	12.454	10.607				14.985	9.958	8.838	11.955				16.435	7.804	8.269	8.337
															11.741	13.12	8.364				17.596	10.194	14.311	8.716				12.584	11.388	7.202	7.877
															9.995	11.761	11.256				15.713	9.117	13.396	6.857				19.347	15.745	9.218	15.917
															8.466	12.073	9.093				9.638	15.076	17.103	5.779				15.525	14.052	12.285	9.242
															6.105	12.95	8.338				12.422	9.697	10.284	10.547				15.976	13.888	14.544	15.672
															10.334	11.358	10.92				13.111	9.937	8.74	8.406				13.384	8.805	11.19	12.313
															15.563	12.704	8.129				10.103	8.154	8.911	9.031				17.565	16.557	11.688	11.382
															11.363	11.93	8.173				6.84	10.186	10.396	10.559				14.39	11.753	10.284	13.07
															14.768	10.66	9.675				14.464	9.488	9.242	9.465				13.271	13.07	7.312	9.486
															7.722	8.992	6.981				12.261	11.694	9.734	9.157				13.222	12.871	9.243	12.031
															7.35	11.037	9.651				13.481	7.722	7.804	8.716				16.453	11.881	6.209	11.004
															10.47	11.662	8.268				16.675	11.887	8.935	9.651				11.662	9.696	10.926	11.004
															11.79	12.402	9.494				10.841	10.284	11.39	9.822				14.174	12.025	15.608	11.857
															9.958	15.849	9.218				16.593	10.842	9.242	7.906				17.699	14.607	7.544	11.255
															11.953	14.999	7.986				9.118	11.084	10.193	11.693				15.339	12.492	15.147	12.325
															11.614	12.4	10.229				12.861	12.534	11.459	8.19				14.607	8.715	10.444	16.379
															10.101	11.529	11.006				13.143	11.858	13.142	9.093				18.127	10.626	7.233	14.144
															12.607	14.007	8.83				17.371	11.515	11.741	11.514				15.114	15.521	8.094	9.156
															11.082	11.523	11.533				12.539	10.299	7.96	9.093				12.893	12.921	11.514	10.186
															8.508	14.23	9.102				15.296	9.675	10.708	9.471				13.57	13.57	8.364	11.356
															9.311	14.841	7.515				11.532	14.332	10.002	9.584				14.33	14.932	10.841	14.725
															8.049	9.881	12.12				13.57	7.572	10.396	9.282				13.255	12.515	17.271	11.832
															7.986	10.714	9.157				9.77	10.709	13.635	7.951				17.5	13.378	10.396	12.114
															13.514	12.326	9.031				8.998	11.558	10.193	12.697				12.601	10.518	18.329	9.871
															9.312	11.827	11.792				12.697	9.555	8.093	10.525				15.26	10.001	14.09	12.313
															8.715	13.899	8.032				11.888	8.838	15.673	9.555				21.838	6.518	9.871	13.717
															8.837	9.117	9.465				15.28	12.326	9.149	12.191				14.464	11.21	10.607	8.74
															7.878	12.022	12.111				13.481	12.494	10.223	12.607				16.383	12.284	9.404	8.38
															8.03	9.481	12.361				12.079	12.21	7.61	9.652				15.532	11.388	6.772	11.293
															11.688	10.763	8.303				13.481	10.92	9.495	7.572				16.604	12.22	15.816	8.189
															9.351	11.515	9.577				11.889	11.037	10.762	7.804				15.89	14.568	13.781	12.584
															9.157	12.727	12.325				9.872	12.772	12.922	9.404				15.372	11.612	17.431	11.741
															9.822	13.764	11.363				9.495	12.77	12.36	14.251				14.489	14.975	15.073	11.293
															11.364	11.364	9.156				16.173	14.311	7.96	12.923				15.562	16.63	15.673	13.675
															8.642	12.192	10.299				11.881	13.026	12.585	14.842				14.494	14.174	9.148	10.978
															8.542	14.054	13.009				9.494	9.652	11.973	7.351				14.846	17.119	12.699	13.292
															9.149	13.816	8.362				11.743	11.345	7.544	9.994				12.584	14.33	16.453	10.395
															7.458	14.509	10.518				11.693	13.245	13.555	13.921				16.63	12.77	14.136	8.87
															8.049	8.839	10.396				17.668	9.844	15.029	9.22				15.976	15.521	20.291	12.231
															10.002	11.741	9.117				17.677	10.299	12.584	8.83				13.378	10.84	9.872	13.244
															10.34	11.495	10.471				14.055	12.192	9.494	10.66				13.96	13.919	16.631	8.507
															9.555	8.329	5.692				12.326	12.263	12.12	8.303				12.809	13.124	16.284	9.148
															9.095	7.571	10.519				13.396	12.454	11.237	9.365				12.208	14.725	12.878	7.202
															9.09	14.622	10.299				11.057	10.828	8.863	16.455				11.14	12.492	11.741	13.899
															8.67	10.84	9.844				9.365	14.417	7.113	15.071				13.899	14.489	15.444	18.312
															8.834	11.004	10.761				8.633	12.584	7.233	11.76				11.133	9.908	13.883	10.919
															8.329	8.716	10.715				9.495	13.428	11.539	9.995				12.959	13.053	9.211	13.222
															7.543	10.707	13.571				12.533	12.263	14.192	11.073				18.233	14.568	7.987	10.395
															8.899	11.583	12.871				13.25	12.721	6.981	12.21				15.521	8.337	7.233	14.622
															9.556	11.761	8.999				12.77	12.693	12.873	11.759				9.842	10.984	12.377	12.4
															7.782	14.842	11.038				16.424	13.316	10.927	10.229				12.871	9.148	15.636	14.607
															8.838	12.72	12.5				11.663	10.608	8.936	12.026				9.148	8.128	15.564	12.19
															12.034	11.953	10.193				13.655	8.83	8.806	15.562				14.763	9.85	7.795	12.072
															9.96	9.145	12.494				14.084	9.96	13.397	9.242				13.888	10.707	16.065	13.255
															8.904	9.842	10.396				13.481	12.377	10.662	12.849				28.772	15.33	15.521	14.563
															11.136	11.857	9.243				10.396	12.073	13.386	11.357				10.25	12.4	11.513	13.717
															7.788	6.612	11.761				10.761	11.514	9.697	10.002				18.676	12.03	14.622	13.037
															7.722	12.12	10.298				8.155	8.364	10.689	7.906				18.843	12.096	15.594	12.921
															8.518	8.837	11.663				11.39	12.607	9.243	10.986				12.699	14.841	12.937	12.601
															6.448	8.707	9.844				11.257	11.006	8.191	14.415				19.56	10.023	15.236	10.47
															7.782	11.532	11.743				11.662	12.878	12.862	11.135				16.538	14.134	13.57	12.584
															8.521	4.848	11.973				13.027	10.607	13.901	11.024				10.472	7.804	10.084	15.339
															7.953	6.246	8.466				16.174	9.282	15.088	9.871				13.885	9.577	9.242	14.7
															7.707	12.478	9.495				10.979	10.628	9.909	10.84				25.736	11.255	9.03	11.881
															8.815	13.336	10.608				10.709	9.829	13.418	15.161				18.488	9.242	9.148	14.174
															9.35	11.347	8.508				10.299	12.263	8.156	11.388				16.285	10.76	10.714	12.77
															9.431	11.014	10.979				12.419	10.924	11.743	16.105				12.192	9.242	7.571	13.222
															6.47	11.927	10.251				9.995	11.735	10.608	9.958				14.491	12.4	15.128	11.557
															10.314	7.113	11.413				10.471	10.341	12.192	10.081				30.173	11.037	14.807	16.695
															10.193	11.852	11.955				18.319	12.546	6.826	11.14				15.851	9.828	8.048	11.953
															9.242	8.684	11.827				15.838	10.979	11.365	9.872				14.189	11.356	8.092	15.114
															7.351	8.211	10.023				10.683	12.488	11.515	7.515				17.45	12.284	8.507	12.096
															11.038	10.609	7.804				13.504	10.159	9.374	9.578				18.519	8.632	9.908	11.832
															10.827	13.973	7.073				12.467	9.652	11.295	11.791				19.38	8.934	8.172	12.601
															8.583	10.721	6.741				10.84	11.583	8.049	9.555				19.023	11.581	9.994	12.072
															7.906	8.808	6.301				10.591	12.22	17.441	9.938				17.831	13.649	11.14	14.33
															9.873	8.701	12.233				9.09	11.613	9.938	10.518				12.856	12.697	8.805	12.532
															11.496	13.599	9.829				11.56	12.54	12.333	11.038				12.895	11.415	10.827	13.416
															9.651	7.467	8.269				13.462	17.372		9.584				14.565	11.024	14.209	12.584
															11.005	9.324	8.589				8.715	8.583		8.583				12.872	13.96	8.934	10.193
															10.708	12.874	9.495				8.031	9.149		11.057				11.057	11.513	11.692	15.539
															10.668	8.142	8.83				13.746	13.224	9.093	9.995				16.285	10.023	16.33	6.96
															12.772	7.58	6.612				11.058	8.715	16.385	7.959				15.374	11.857	12.725	11.388
															13.143	11.441	9.35				11.111	6.733	13.396	7.796				15.465	13.07	12.072	13.591
															10.84	10.66	8.839				14.694	9.095	12.169	13.717					10.158	15.813	12.208
															13.53	15.924	8.975				10.44	10.709	11.358	11.539					6.772	17.45	9.494
															12.221	12.704	6.47				9.181	8.741	12.121	10.979				17.105	11.388	12.854	13.779
															10.299	15.526	8.056				11.363	13.143	10.499	8.022				7.311	14.725	11.557	12.486
															10.848	12.872	6.117				16.187	9.873	15.565	10.002				8.716	12.893	11.344	12.72
															10.827	12.692	6.117				17.564	12.263	12.191	13.481				18.934	6.469	8.465	10.545
															12.139	15.783	8.023				10.716	9.653	14.877	10.668				13.055	15.26	8.154	11.004
															13.224	12.121	7.184				10.563	10.193	13.677	11.741				14.272	10.332	5.46	11.735
															13.445	13.631	11.005				10.41	7.35	11.34	6.698				14.134	13.898	9.464	6.3
															10.984	12.304	7.144				11.175	10.92	12.281	11.832				12.221	11.255	8.837	8.632
															7.61	16.731	11.295				12.034	9.28	12.074	9.77				14.534	10.284	9.093	11.971
															10.842	13.664	10.545				13.366	10.927	13.516	13.185				18.275	14.763	7.425	12.208
															10.285	12.08	10.251				9.931	9.821	9.321	11.973				15.942	13.222	9.871	13.384
															13.724	13.396	6.069				13.632	9.35	11.271	14.19				16.438	12.231	5.691	13.271
															11.212	12.883	6.057				6.593	9.652	10.616	9.908				13.759	11.532	8.154	13.314
															10.827	12.402	9.157				12.306	11.237	16.935	8.583				13.528	14.622	10.193	11.004
															11.025	15.542	7.959				10.643	9.77	12.263	10.842				13.781	11.735	8.54	12.208
															11.294	7.443	8.032				17.375	12.692	8.357	12.811				13.888	15.539	11.356	13.427
															9.734	12.032	7.312				16.772	10.943	10.774	8.337				15.971	7.282	12.854	9.349
															12.5	11.346	6.105				16.106	13.072	8.642	9.873				12.031	13.512	12.36	8.739
															6.981	11.623	8.311				12.34	12.488	11.707	10.927				11.887	11.004	11.832	11.612
															10.285	8.993	6.857				14.495	9.218	9.918	12.192				9.651	11.759	12.377	9.464
															10.472	12.08	8.716				12.285	12.705	13.519	7.515				15.001	12.515	13.141	6.424
															11.025	10.979	8.466				14.008	13.227	11.295	11.365				13.222	12.691	9.532	9.651
															10.668	12.974	7.796				15.077	9.934	8.725	11.558				12.515	11.388	9.365	7.804
															12.693	11.015	8.642				15.467	8.633	12.875	9.838				16.332	11.513	13.314	9.494
															13.224	9.851	6.07				16.868	9.35	12.895	8.838				5.986	13.053	11.255	11.513
															15.073	10.92	7.582				10.396	8.434	10.349	6.668				18.965	11.79	11.581	9.815
															7.906	8.322	9.157				14.978	7.961	9.653	8.348				20.291	9.464	14.31	9.414
															11.887	9.816	8.173				13.3	9.779	7.035	10.735				14.029	10.023	13.271	8.551
															11.827	10.265	7.437				15.453	7.248	10.23	11.271				12.872	8.172	13.075	8.172
															15.447	14.084	7.544				11.243	7.873	12.517	9.399				19.235	8.739	10.827	8.75
															14.807	7.97	8.542				16.106	11.135	9.09	11.805				15.89	11.255	11.753	8.582
															12.031		9.101				15.317	11.284	8.897	12.986				19.274	9.828	13.96	9.292
															7.619		9.533				13.545	10.306	10.975	11.956				15.073	9.03	14.027	7.459
															11.971	15.578	6.95				15.13	12.076	11.026	8.709				14.991	9.842	15.085	8.032
															12.191	15.673	7.042				10.841	6.016	9.671	14.607				14.877	10.626	13.717	8.799
															10.519	13.257	7.458				11.135	8.85	9.997	8.148				15.262	10.606	10.518	7.769
															10.979	8.508	7.496				10.172	10.082	9.597	9.933				9.908	9.994	10.193	8.896
															7.805	9.937	7.805				8.741	8.434	9.284	10.875				13.316	11.735	12.584	7.988
															7.233	11.688	6.698				9.494	7.404	8.054	7.272				14.43	11.79	9.554	11.21
															11.005	7.904	6.741				10.841	7.986	7.208	6.859				11.135	11.037	12.498	8.191
															10.714	9.844	8.74				10.714	9.641	11.775	9.934				17.726	9.696	9.651	10.535
															13.724	10.298	8.406				9.937	10.238	16.022	6.983				15.978	9.349	9.085	7.272
															7.805	9.578	6.825				9.909	7.372	11.145	9.779				11.212	13.292	10.687	10.327
															10.334	7.722	9.696				9.465	8.805	14.09	9.911				12.209	11.588	5.512	9.134
															10.299	10.059	7.805				10.158	11.549	10.039	8.036				12.653	12.231	13.759	8.536
															9.118	7.878	5.692				12.811	10.662	11.586	7.88				7.951	10.193	9.577	9.399
															7.619	14.629	9.908				12.139	7.96	13.184	9.087				10.334	16.118	12.36	9.016
															7.204	10.194	9.404				13.224	9.652	12.499	9.26				15.314	10.919	13.649	11.759
															8.708	11.59	6.163				11.558	13.12	7.196	8.686				10.518	10.101	8.739	10.172
															9.242	8.871	5.354				12.22	8.049	9.838	12.187				8.542	9.703	9.242	9.244
															11.588	11.496	7.113				12.727	10.229	8.916	10.994				13.633	9.365	14.568	9.67
															14.465	12.725	5.926				11.827	11.588	9.106	8.142				9.703	10.395	10.332	8.218
															9.821	10.285	7.073				8.929	9.117	6.35	8.975				13.026	12.697	7.495	9.673
															10.299	9.733	5.986				11.206	10.229	9.882	9.143				11.156	10.193	12.532	7.686
															13.055	9.243	7.987				11.341	9.211	9.773	8.753				19.98	9.554	11.741	7.818
															9.165	10.417	8.466				9.482	15.416	12.672	7.805				17.417	14.39	10.332	10.908
															10.761	7.351	7.184				10.452	12.098	10.608	10.441				19.685	10.525	9.769	8.191
															10.395	11.832	7.805				17.958	11.237	8.571	9.512				20.037	10.298	10.193	9.181
															9.496	12.17	8.094				14.511	12.327	12.276	11.384				18.488	10.228	8.87	10.762
															9.703	15.333	8.633				18.272	11.004	11.973	12.046				16.297	10.221	10.72	10.343
															9.729	11.553	11.973				11.345	11.558	13.379	10.514				16.594	9.164	9.117	9.651
															7.908	6.461	7.666				12.139	8.87	13.039	9.989				19.133	13.206	9.651	8.174
															10.411	8.56	6.857				19.055	9.637	12.587	9.283				19.543	11.255	11.293	10.98
															9.596	7.216	6.535				12.121	10.775	11.397	9.925				14.701	9.85	11.513	8.441
															9.662	9.641	6.163				15.578	10.518	4.826	10.425				17.857	13.053	10.606	8.872
															10.229	11.037	6.117				16.38	10.901	8.72	8.993				13.379	9.769	14.454	0.189
															11.437	5.143	7.987				17.036	10.547	10.076	8.348				15.578	9.218	13.222	9.236
															10.764	10.26	6.163				14.842	9.487	9.948	8.485				18.86	9.494	10.001	9.66
															9.647	7.631	8.337				14.842	9.095	8.716	8.72				18.902	15.372	8.739	8.503
															9.938	15.002	6.07				14.509	8.862	8.476	7.233				15.449	11.971	7.904	11.857
															11.29	14.231	7.351				11.539	11.791	9.293	14.991				18.962	13.96	6.949	9.486
															8.929	11.737	7.042				14.007	9.157	6.647	10.266				13.396	7.35	11.236	10.186
															7.404	11.496	9.465				12.544	10.545	9.558	8.824				17.828	11.388	6.824	11.056
															6.714	14.257	7.722				11.581	13.765	7.575	9.994				15.924	11.356	8.641	10.193
															9.461	14.009	6.244				12.498	9.674	7.351	7.819				11.761	14.011	8.837	12.635
															8.443	12.209	8.999				13.68	7.194	11.109	9.996				14.783	10.08	9.936	10.193
															11.602	8.508	7.61				12.232	12.079	8.219	10.711				13.072	15.818	10.193	10.66
															12.602	11.142	8.566				13.883	12.12	12.303	8.338				13.682	11.037	9.532	10.284
															12.902	12.923	9.533				13.718	8.542	11.265	10.193				11.741	12.601	9.164	10.186
															11.024	7.96	6.815				12.697	9.031	12.876	9.995				12.121	11.538	12.635	7.272
															9.431	8.129	6.88				13.759	10.229	16.703	11.142				16.715	9.403	12.606	11.953
															9.504	12.122	9.662				14.702	8.871	12.601	10.414				14.511	12.652	11.513	12.86
															8.604	9.466	10.334				9.696	8.466	11.39	9.064				18.563	14.99	8.805	11.444
															9.507	16.743	12.263					12.637	11.779	9.558				12.517	11.388	9.828	11.741
															7.95	8.993	10.356					10.299	8.808	9.86				16.121	8.172	8.715	10.986
															8.824	9.465	6.714				11.134	10.84	12.795	7.907				15.311	9.732	8.54	12.921
															9.073	7.706	9.095				12.602	6.773	12.685	11.384				13.759	11.388	11.037	6.513
															8.142	13.818	7.564				14.919	7.878	8.175	6.105				13.336	14.385	10.47	8.837
															7.458	10.714	9.467				12.326	13.427	8.715	12.511				15.851	11.363	10.714	9.936
															6.427	11.384	11.111				11.345	9.495	11.117	9.321				15.331	10.626	9.651	6.824
															10.396	9.117	9.237				10.848	10.721	9.872	9.692				15.82	13.026	10.332	9.958
															8.799	12.697	8.402				10.23	13.396	12.153	10.077				12.95	10.926	9.486	12.096
															9.048	7.721	7.764				9.031	12.026	12.511	7.603				12.811	11.388	11.037	9.871
															6.981	8.466	7.837				9.873	11.256	14.038	8.621				18.212	12.208	13.649	10.193
															7.782	9.118	8.642				6.244	10.002	13.885	9.399				15.973	10.298	12.377	15.521
															10.158	13.443	7.805				9.495	10.547	10.66	13.537				11.589	10.298	12.515	7.959
															8.129	11.972	9.284				11.515	9.85	10.294	8.329				14.231	10.332	10.919	9.769
															9.243	10.002	10.377				11.005	9.373	12.457	8.356				15.755	10.518	10.415	10.667
															9.611	11.358	7.706				13.651	9.494	8.867	10.285				12.849	17.102	7.282	10.193
															7.156	8.303	9.073				12.402	8.508	11.025	10.757				13.142	7.904	9.349	9.908
															10.204	12.208	8.551				7.795	7.666	12.199	9.533				11.76	12.208	11.413	9.211
															9.911	10.059	9.365				6.436	8.935	14.313	8.726				16.624	15.608	11.494	11.538
															8.559	10.395	9.701				7.986	12.725	10.769	9.555				13.572	11.857	14.209	12.377
															9.398	8.975	9.507				11.791	10.285	17.498	11.2				18.186	10.66	13.426	11.024
															8.62	8.269	6.818				13.072	10.841	13.964	12.563				15.262	11.037	13.528	9.82
															6.689	7.312	7.45				12.498	11.755	8.338	9.675				17.14	12.486	10.518	10.47
															9.917	13.396	8.824				11.364	9.873	9.937	8.969				17.121	14.543	10.001	11.356
															7.621	11.256	9.26				16.38	8.508	12.317	7.722				15.087	15.754	9.349	9.464
															5.628	9.243	6.693				15.331	9.211	11.553	7.351				21.792	10.984	6.74	13.384
															10.101		8.97				10.334	15.65	11.663	10.657				19.024	12.12	8.829	9.703
															7.006		6.944				10.194	11.514	10.21	12.049				17.14	12.948	6.513	6.824
															8.687	11.18	8.571				10.607	8.407	10.344	10.495				17.501	14.7	13.416	12.22
															6.773	9.938	10.425				10.662	11.005	16.384	9.404				15.261	10.66	13.271	10.415
															10.616	10.901	9.734				7.666	9.844	10.474	11.738				14.211	14.365	9.03	8.465
															6.448	8.049	7.068				10.285	13.17	11.209	11.344				13.055	12.208	8.465	11.881
															7.096	9.118	7.874				9.586	10.334	14.816	13.65				16.423	12.261	9.164	10.84
															10.717	7.878	9.399				5.301	7.572	8.996	9.149				9.995	11.494	10.707	10.767
															9.771	12.95	8.561				7.272	10.761	11.256	10.737				14.783	12.11	8.78	11.971
															9.307	8.633	13.545				7.143	7.233	8.087	14.064				12.098	14.068	10.707	10.919
															11.037	10.101	11.415				8.094	8.19	9.106	11.2				11.257	11.692	12.584	12.048
															8.978	13.651	11.792				12.402	9.03	8.97	8.872				11.057	12.937	9.464	12.921
															9.656	10.715	13.885				11.852	14.211	8.451	10.426				13.141	13.628	7.959	13.96
															8.094	11.237	16.605				13.251	9.085	6.96	10.035				12.517	16.295	11.513	12.072
															8.175	9.404	15.759				13.38	11.581	7.723	7.383				11.532	15.539	15.442	11.363
															5.542	14.146	10.628				9.653	10.299	11.986	11.174				10.606	11.037	15.809	12.417
															8.349	8.328	10.471				9.102	11.357	10.984	8.247				11.293	11.004	8.092	11.21
															8.652	9.734	14.49				10.775	9.311	12.261	8.218				8.74	12.515	8.507	14.33
															7.906	10.263	11.257				11.753	12.921	8.219	10.097				9.822	11.881	9.494	8.998
															8.035	8.364	11.889				14.877	13.386	5.59	11.51				9.117	10.248	9.532	12.22
															9.284	10.081	13.245				15.029	12.584	8.969	11.865				12.079	16.622	12.725	14.563
															5.977	9.578	11.889				11.663	9.473	14.605	9.415				11.345	14.43	12.03	10.66
															6.757	10.472	11.39				11.694	9.35	9.597	10.168				9.873	10.919	11.557	17.984
															9.512	8.022	9.733				9.909	11.495	6.405	8.979				13.764	11.363	14.627	12.492
															9.64	6.247	9.674				9.85	13.416	8.302	14.257				12.653	13.009	12.601	10.559
															6.538	16.26	10.601				14.783	10.299	9.345	9.065				13.966	11.004	12.921	10.332
															9.675	11.852	5.628				10.34	9.652	8.265	6.363				10.827	10.687	11.741	8.405
															8.727	14.745	10.668				17.724	8.406	8.466	11.084				10.607	11.255	19.641	8.739
															7.671	15.128	8.337				16.932	10.601	12.305	8.594				10.471	13.07	14.729	9.471
															5.421	14.07	10.709				15.448	10.298	8.559	7.95				7.351	12.096	8.829	11.581
															5.149	15.22	8.566				9.844	11.581	8.604	8.032				14.915	10.984	17.417	9.584
															6.627	12.209	7.184				8.102	8.583	9.99	11.442				15.077	11.056	12.119	7.282
															10.019	12.494	7.618				13.384	13.418	11.743	12.872				11.779	9.949	10.76	10.498
															11.524	8.716	8.566				10.251	10.626	7.572	11.971				11.743	12.893	12.697	9.101
															8.442	9.212	11.851				9.734	11.293	7.351	11.11				16.062	11.612	14.899	9.164
															7.283	10.472	7.96				11.583	11.851	9.157	10.711				12.402	11.178	14.25	7.232
															7.496	10.608	7.768				9.909	12.21	10.607	5.929				15.149	9.85	14.23	8.465
															6.326	13.244	8.998				10.284	10.9	8.538	11.194				14.564	10.76	9.696	10.978
															7.582	10.415	10.193				9.243	13.224	5.388	6.259				12.922	12.893	9.703	11.004
															5.878	10.334	7.457				11.14	12.517	8.263	7.283				6.447	11.185	12.921	8.048
															9.654	9.937	12.261				10.285	10.499	8.219	8.97				6.244	13.244	12.921	11.004
															7.489	11.973	9.937				12.114	9.212	8.054	13.168				15.809	9.156	13.222	8.998
															9.837	12.499	9.218				9.704	11.084	8.094	9.314				15.906	7.986	13.591	9.494
															8.139	11.972	7.351				11.345	10.842	7.025	8.716				13.676	6.908	10.984	11.255
															8.173	10.607	10.059				9.995	9.908	12.834	10.48				14.842	13.394	12.22	8.998
															8.806	10.9	6.773				12.585	9.872	6.428	9.772				17.016	7.142	14.052	11.388
															10.968	9.909	13.593				12.872	7.906	10.076	6.669				16.142	10.221	11.513	10.984
															8.824	9.366	9.156				11.515	13.011	9.466	9.156				11.186	12.19	15.26	11.185
															7.438	8.999	10.606				7.35	14.013	10.438	11.676				15.015	11.255	12.691	9.211
															8.501	10.841	11.39				12.534	13.724	6.692	9.734				12.116	14.25	10.101	14.39
															9.512	9.734	12.049				11.257	9.908	7.878	8.783				14.848	12.208	7.58	7.072
															8.129	9.674	14.901				10.396	9.871	10.535	9.817				15.166	11.662	14.415	8.934
															9.938	13.676	14.919				13.544	10.002	5.944	7.195				12.961	5.889	15.33	9.464
															10.722	17.014	8.633				11.082	11.243	8.993	12.653				14.613	11.857	20.124	8.974
															11.973	9.96	16.107				10.395	11.561	8.459	10.26				11.972	12.809	15.34	8.405
															10.081	9.488	13.593				7.986	10.308	12.153	12.211				15.526	9.156	12.923	7.986
															10.98	13.245	13.719				5.354	7.458	12.889	8.102				11.755	10.186	12.653	7.656
															4.559	10.06	12.073				10.84	10.657	9.03	6.698				13.677	9.994	12.208	10.284
															10.194	9.704	10.059				8.406	12.513	12.717	8.621				16.173	11.494	9.218	14.33
															11.058	10.499	10.606				10.333	9.527	7.067	12.895				19.158	9.651	13.037	8.998
															12.699	12.607	12.861				6.825	10.063	5.542	14.976				14.991	9.164	10.98	13.654
															11.515	9.675	10.662				10.417	10.455	8.758	13.717					12.515	15.029	12.22
															11.346	13.072	11.887				6.981	9.314	8.61	16.675					12.691	8.74	8.641
															10.669	10.298	12.116				15.13	7.593	9.373	9.404				20.711	11.79	12.12	12.697
															12.586	8.782	13.572				14.415	9.918	8.806	12.922				13.336	11.056	13.222	11.759
															10.561	11.295	12.032				12.233	8.87	11.581	9.994				15.185	11.692	12.12	9.28
															8.304	14.73	12.419				12.332	14.785	8.621	13.009				14.23	11.741	11.589	12.325
															9.157	11.583	14.609				9.157	8.434	9.637	13.053				10.709	12.606	11.135	12.893
															12.951	8.466	9.873				11.006	9.918	8.476	11.971				6.96	10.606	9.872	13.649
															7.805	13.075	12.221				13.635	9.465	6.669	10.299				10.396	10.76	12.539	15.534
															12.362	10.187	12.811				13.765	10.285	11.857	15.61				11.663	15.076	4.936	13.119
															9.697	10.444	6.612				13.055	10.842	9.017	14.978				9.851	11.344	10.607	11.887
															13.724	10.92	7.113				13.53	10.439	7.768	14.591				11.294	9.156	11.76	15.539
															9.465	8.303	8.839				9.871	10.034	11.373	9.995				9.651	10.767	10.628	11.457
															10.715	10.417	7.544				14.432	10.554	8.087	13.65				10.101	10.249	6.469	12.452
															8.863	9.96	7.805				13.781	10.193	8.383	15.26				8.91	12.031	7.572	11.612
															12.192	12.849	9.366				15.688	13.472	9.816	14.013				14.251	13.075	8.633	14.607
															11.614	14.511	9.771				12.402	12.186	9.284	7.619				6.436	12.19	8.975	8.715
															8.542	13.273	10.561				12.121	12.761	13.182	9.464				8.328	8.78	9.157	7.232
															11.295	9.96	9.638				7.96	9.817	8.166	10.761				14.464	9.908	14.809	8.87
															9.909	13.961	12.489				7.906	8.769	8.996	7.878				12.811	10.284	8.708	9.101
															11.852	9.488	10.608				12.121	8.566	13.821	7.351				14.93	12.498	17.419	9.908
															10.829	11.588	7.351				11.514	8.85	10.395	17.469				11.622	9.696	15.22	12.635
															9.366	13.224	7.987				12.221	7.027	9.513	13.396				14.476	10.599	13.962	11.953
															10.842	9.149	8.466				11.135	12.094	7.283	12.049				12.094	13.335	13.294	9.349
															8.642	6.709	9.771				12.36	7.705	8.782	10.229				14.461	15.33	13.077	13.712
															10.341	8.269	7.233				13.396	8.863	8.407	11.004				15.28	8.362		10.919
															8.173	11.025	9				14.417	7.576	9.399	16.557				14.025	12.584		15.672
															8.466	9.157	8.466				14.727	8.166	7.312	11.459				13.365	13.427		13.862
															8.542	6.47	9.586				14.007	7.708	12.127	11.005				12.719	6.346	10.526	13.184
															9.313	9.873	12.699				17.054	9.244	10.55	11.583				18.841	12.871	11.533	9.958
															10.06	12.361	9.822				11.084	10.804	9.157	12.361				11.143	11.532	11.142	10.767
															9.243	10.761	7.204				14.624	9.102	10.792	10.23				7.907	8.465	9.995	7.959
															9.578	9.282	10.334				13.919	7.283	15.36	11.971				11.435	10.827	14.726	8.38
															8.338	9.584	10.762				12.811	9.652	10.349	12.585				17.169	11.14	12.772	11.14
															11.365	10.901	10.277				11.514	10.518	11.038	14.49				11.769	11.004	13.96	13.528
															11.384	10.103	10.901				13.781	8.998	11.547	12.36				17.209	12.208	11.084	12.137
															10.601	8.708	13.482				13.53	10.769	11.706	9.118				11.931	12.959	12.895	13.292
															10.251	12.402	10.547				19.925	11.972	9.504	8.974				11.857	10.919	17.368	11.004
															10.299	8.337	11.238				14.134	11.293	11.562	12.54				14.39	11.513	15.893	13.298
															12.5	8.154	7.951				13.257	12.121	13.049	14.465				9.652	13.271	12.121	13.206
															12.637	7.96	6.857				15.002	13.314	9.244	17.121				7.393	10.525	13.445	12.377
															9.675	10.769	10.173				14.332	10.334	13.692	17.907				11.865	14.189	15.261	14.999
															9.212	12.894	9.822				10.927	11.741	11.854	14.192				12.853	8.739	13.027	11.826
															11.792	7.805	10.103				11.459	9.365	11.285	17.188				12.48	13.443	10.986	6.824
															9.118	11.761	11.973				12.811	10.333	10.715	21.256				13.412	13.394	8.407	8.503
															11.743	7.282	8.642				8.716	12.026	12.192	22.882				13.252	11.293	11.79	10.479
															7.515	9.651	7.796				14.07	13.294	13.182	14.843				9.838	10.926	11.186	9.23
															11.755	7.796	9.938				12.332	10.193	13.572	13.026				14.786	11.037	12.546	9.384
															6.448	11.457	10.124				12.856	7.768	14.848	11.851				10.843	14.33	11.415	12.208
															10.52	13.244	8.741				13.053	11.779	12.325	11.608				8.086	12.77	12.544	9.974
															11.663	11.39	11.743				11.792	9.03	15.901	11.602				6.469	9.365	14.976	7.026
															9.873	10.47	8.863				12.849	11.955	13.573	9.487				15.154	10.08	14.465	8.62
															10.628	12.209	7.768				11.539	9.908	12.834	9.77				11.378	13.57	16.187	7.665
															9.313	11.004	6.21				13.244	10.194	10.247	7.383				14.629	7.804	9.908	7.155
															11.515	10.608	7.233				9.165	12.079	11.193	12.235				7.373	12.725	10.159	9.23
															8.269	10.396	7.987				15.28	11.971	11.827	9.611				8.72	13.792	8.094	7.459
															10.608	10.444	6.058				10.668	13.026	12.811	12.655				14.993	9.651	12.871	7.006
															13.338	10.662	8.304				16.885	13.649	13.719	11.384				17.035	11.513	12.766	9.532
															7.273	10.901	8.542				13.676	12.601	11.694	11.95				16.604	15.372	14.915	6.827
															11.39	8.049	8.542				9.373	15.815	8.71	10.871				14.975	12.871	11.533	6.625
															8.312	9.844	8.863				9.586	12.534	9.58	8.929				14.763	15.028	13.244	6.692
															8.312	7.571	10.396				8.329	12.533	8.741	12.768				17.169	6.908	12.95	11.255
															12.027	11.515	8.023				7.96	10.193	13.676	9.837				14.783	11.293	11.135	9.871
															7.666	9.095	6.981				8.993	12.533	12.699	9.413				14.918	11.79	16.187	11.413
															11.365	8.049	8.741				8.033	10.84	11.854	8.33				19.761	8.507	10.417	10.193
															9.851	9.488	8.338				9.138	11.237	9.778	9.918				15.802	11.662	12.12	8.325
															9	9.675	10.003				12.076	13.009	11.199	11.855				13.46	11.133	10.715	10.919
															11.006	12.209	8.782				8.808	12.534	8.302	10.836				13.884	12.893	13.761	6.243
															7.805	13.967	7.906				9.322	11.363	7.665	14.253				13.524	13.649	15.262	7.609
															9.282	9.873	14.367				10.414	13.125	8.799	9.975				14.884	11.581	9.464	10.76
															10.547	8.502	9.366				8.149	13.12	10.145	9.844				13.929	14.144	13.677	13.633
															10.472	10.842	14.272				10.266	11.457	10.642	8.328				13.713	12.12	14.286	8.649
															8.782	14.511	9.102				8.948	12.325	9.696	6.891				10.048	10.626	17.859	8.101
															10.194	13.224	10.223				8.726	12.36	11.236	8.862				15.397	11.457	13.273	9.093
															16.663	12.873	9.366				10.308	10.774	9.321	7.631				13.63	8.829	13.316	9.494
															15.149	8.999	10.003				10.898	13.223	10.039	8.632				11.805	10.518	9.218	6.98
															12.074	9.653	10.103				10.832	13.555	12.36	12.687				14.725	12.19	10.159	12.601
															11.515	15.565	14.367				12.081	14.887	12.12	9.697				7.006	13.244	13.143	9.372
															9.873	15.611	10.776				10.454	12.854	11.459	9.345				9.466	13.423	13.714	13.314
															10.194	14.57	13.251				11.622	12.584	12.615	12.48				14.487	10.395	11.834	10.525
															11.761	10.547	8.863				10.791	11.832	12.809	10.097				14.607	10.545	13.396	8.302
															9.533	12.608	8.782				12.984	13.428	13.883	7.925				17.119	12.809	11.858	6.104
															11.761	13.651	15.611				8.968	10.926	12.966	8.993				14.285	15.26	12.209	8.048
															8.782	11.558	11.187				8.576	9.311	6.772	9.934				14.612	12.325	10.498	14.543
															9.533	12.032	10.769				11.834	13.396	13.336	12.419				14.39	13.378	12.585	11.662
															10.901	12.895	12.402				11.36	12.073	10.988	8.166				12.921	10.66	13.054	10.899
															7.073	11.834	9.488				8.195	11.037	10.581	14.096				14.913	12.284	11.532	10.339
															7.073	11.583	12.027				11.322	11.135	11.056	10.454				9.471	16.282	10.103	9.554
															11.415	12.327	9.586				10.657	11.779	10.395	9.842				18.312	11.79	9.496	9.936
															10.472	12.873	13.89				11.498	10.194	11.816	10.521				14.937	11.513	10.841	9.871
															11.743	11.346	15.088				9.103	13.57	9.174	8.362				14.155	11.513	6.709	9.403
															9.118	10.299	11.18				11.026	14.784	8.752	10.499				12.948	15.704	15.077	7.232
															13.397	11.415	9.771				11.548	10.848	9.43	10.314				9.871	12.325	13.224	8.837
															8.269	10.662	15.444				13.143	11.539	10.535	9.183				11.344	10.767	9.496	11.857
															12.033	8.708	12.08				14.367	10.56	9.156	12.562				13.649	11.444	13.885	9.842
															8.508		11.792				11.614	11.388	13.779	8.914				12.725	16.622	13.962	9.842
															6.857		11.006				12.878	14.405	10.417	11.51				9.732	10.339	11.135	8.101
															9.873	10.444	10.187				11.496	12.699	12.766	9.312				7.072	13.528	9.844	14.744
															12.192	12.419	8.338				9.651	14.809	10.722	8.159				6.3	12.031	14.251	13.141
															11.761	11.779	12.327				16.298	13.92	9.136	8.297				15.338	10.714	16.121	12.072
															9.15	12.139	16.607				6.301	12.418	6.772	9.284				8.043	11.538	10.688	10.332
															10.561	9.085	9.996				12.025	12.534	9.156	11.175				20.477	9.494	16.538	12.697
															9.22	9.35	10.285				8.155	9.148	8.576	8.635				17.678	14.763	8.021	10.332
															10.709	11.759	10.396				8.303	13.443	7.488	10.189				6.058	13.764	11.446	12.697
															10.285	12.314	11.446				4.233	9.995	9.451	11.398				14.029	10.101	12.546	11.004
															11.761	7.768	11.743				7.61	10.84	9.771	13.106				17.613	9.093	12.331	11.826
															8.567	7.95	11.459				4.283	9.156	12.127	11.36				7.572	9.735	13.718	9.994
															8.466	4.936	8.634				13.817	10.84	11.791	9.844				15.333	10.518	14.702	9.673
															9.087	12.893	6.961				14.003	10.84	11.206	8.709				11.755	10.518	11.135	7.571
															9.556	11.413	11.59				8.033	9.908	13.408	9.494				13.572	12.22	13.053	7.495
															10.722	8.641	6.07				9.584	10.842	15.138	11.257				15.611	18.202	9.365	9.349
															8.269	10.761	7.144				11.622	11.663	9.636	12.693				14.746	11.753	12.073	10.193
															8.191	12.871	9.873				11.111	13.338	9.414	7.61				11.384	15.33	13.294	12.377
															8.329	8.303	6.163				12.883	12.049	12.139	11.514				12.811	15.976	13.883	9.871
															11.038	7.666	10.251				13.865	11.514	10.023	9.938				11.829	12.697	14.39	10.559
															8.782	10.84	16.676				12.518	9.577	10.79	11.257				13.077	12.12	13.427	9.464
															10.334	10.707	10.722				12.213	8.715	10.306	8.716				10.722	14.509	15.542	9.211
															10.299	13.428	12.603				9.733	8.405	14.047	11.857				13.224	9.584	13.635	10.66
															10.842	6.981	7.666				14.627	11.688	14.446	9.881				12.856	16.592	8.362	11.133
															7.666	7.233	10.299				11.293	13.57	9.466	11.078				13.121	11.255	11.004	12.03
															10.628	11.082	10.223				15.077	11.363	7.95	15.551				14.146	10.298	13.78	12.261
															9.366	9.844	12.546				13.96	10.761	11.377	11.919				16.425	10.525	12.12	9.908
															9.651	10.454	10.689				14.39	12.191	10.062	12.872				11.761	8.328	14.175	13.543
															10.84	11.295	7.515				8.129	10.102	8.707	9.699				16.631	13.141	15.448	9.673
															8.935	10.699	10.715				12.079	10.841	8.174	9.934				16.436	9.82	11.459	10.47
															14.545	12.655	8.806				10.06	11.294	7.63	9.242				14.976	9.28	11.558	10.468
															12.544	9.963	6.826				15.851	10.721	9.189	12.199				14.211	10.058	14.746	12.697
															16.174	14.308	11.084				17.016	10.249	11.236	9.073				13.313	11.255	14.013	10.926
															9.908	9.504	10.722				13.185	9.373	8.311	8.651				18.644	10.84	12.494	7.112
															12.601	8.552	7.515				9.844	13.593	10.223	9.578				18.552	8.739	11.827	10.443
															12.699	14.415	10.396				13.386	9.77	12.303	9.244				13.89	11.826	14.491	6.622
															10.499	9.917	6.95				17.265	10.498	14.326	8.866				15.922	11.692	10.978	8.78
															12.22	10.56	9.366				15.924	11.614	13.712	9.482				13.545	10.332	11.513	11.255
															8.102	10.019	7.722				11.294	12.872	9.494	12.636				15.564	10.395	13.675	10.545
															11.294	10.078	10.396				11.972	9.995	12.893	14.594				15.187	14.7	8.302	10.228
															12.418	13.256	8.708				16.349	10.158	14.321	7.962				10.526	9.365	18.859	14.134
															12.653	8.999	11.257				12.585	10.101	13.587	10.924				16.507	9.365	7.041	12.584
															9.704	11.663	8.338				11.057	10.229	11.092	14.332				14.231	8.74	12.719	13.443
															8.998	6.942	9				13.168	11.005	12.208	13.182				11.388	10.339	18.641	11.037
															12.494	7.614	8.156				14.544	10.158	8.101	9.616				11.256	9.28	14.365	10.667
															10.444	12.233	8.839				16.606	11.383	9.556	7.216				11.388	8.649	10.023	10.714
															9.117	6.84	9.157				9.471	10.249	10.245	10.356				15.814	11.887	17.035	11.662
															11.663	7.906	7.768				11.515	12.872	13.55	8.253				13.544	13.222	9.211	12.584
															9.873	11.284	8.329				11.753	10.332	15.406	9.845				11.589	14.975	12.893	10.158
															11.135	8.338	6.741				11.827	10.193	11.288	11.182				16.951	8.021	13.649	11.356
															10.519	12.049	8.364				11.365	9.958	9.276	10.843				12.854	7.665	14.543	9.908
															11.694	8.57	9				11.18	12.191	11.675	11.182				13.251	5.678	15.409	9.311
															12.139	7.535	8.381				13.126	9.696	12.704	12.314				7.709	14.174	20.627	12.031
															11.583	7.458	8.542				13.396	8.566	13.05	12.36				12.478	13.48	13.717	10.498
															9.404	9.653	9.405				8.78	10.774	12.717	11.973				11.024	9.769	11.082	10.395
															12.049	10.761	6.514				9.958	9.464	12.528	10.547				5.729	9.242	15.608	10.545
															12.418	11.663	10.709				10.06	10.626	15.522	14.967				6.09	15.185	11.185	9.464
															13.764	7.184	7.572				8.838	7.986	11.134	9.482				11.761	10.984	13.244	7.182
															10.901	10.84	7.666				10.081	9.995	9.733	8.685				10.299	13.037	11.185	11.255
															9.404	9.101	7.467				10.298	12.377	14.197	9.466				16.905	11.382	13.919	15.608
															11.038	8.269	8.338				19.743	11.588	8.059	9.745				9.96	14.543	12.601	11.444
															12.032	9.351	7.467				12.949	9.118	10.513	10.452				13.251	15.971	11.21	11.881
															9.157	11.792	7.113				14.138	9.365	13.06	12.208				9.703	10.72	9.85	17.956
															10.341	8.466	11.238				10.047	15.673	10.795	9.745				6.668	11.538	9.464	10.395
															11.851	13.418	8.032				15.834	8.838	8.709	10.842				12.959	12.691	15.704	13.512
															9.842	13.396	10.341				11.858	9.651	10.762	9.617				14.511	9.397	11.255	9.936
															13.244	11.142	8.269				14.465	10.332	9.464	9.674				14.084	13.722	14.884	14.563
															10.34	10.56	8.741				12.13	10.608	17.053	7.805				18.797	10.284	8.337	8.507
															10.761	10.721	8.741				11.955	7.072	15.927	10.847				12.871	13.384	14.144	13.57
															7.192	7.878	11.59				6.693	11.79	12.809	10.545				12.856	11.382	12.652	6.824
															12.192	10.514	9.473				10.147	8.38	11.79	7.126				12.073	13.249	12.498	11.741
															7.58	10.331	9.165				11.193	13.251	14.33	11.34				13.962	12.031	9.494	11.185
															11.294	10.981	7.96				12.443	12.208	12.584	11.013				9.577	7.232	10.332	10.84
															11.459	12.536	8.304					9.157	11.32	8.476				15.143	8.507	11.178	11.004
															12.327	10.616	7.768					11.212		10.721				13.931	9.703	10.332	12.452
															10.333	13.893	8.094				22.539	11.294		8.863				16.506	12.584	9.311	11.037
															8.466	10.901	6.514				16.065	9.842		12.038				11.18	10.415	13.68	4.866
															10.23	10.396	8.936				17.699	9.311	12	5.944				16.734	11.832	8.54	8.974
															10.333	11.572	9.473				16.759	10.606	14.158	8.71				8.406	12.854	15.442	7.609
															10.92	9.829	7.233				11.513	9.697	11.384	8.768				14.563	10.158	9.936	9.464
															8.329	12.902	6.163				15.594	8.508	10.146	7.365				6.772	11.242	12.893	11.133
															11.693	12.357	8.912				12.498	11.446	7.382	10.06					12.876	12.137	11.513
															10.687	13.478	9.938				11.753	11.588	9.365	8.83					9.117	13.48	10.84
															13.054	12.53	8.302				13.222	11.294	8.999	9.668				15.564	11.382	12.893	10.193
															10.56	13.82	11.135				8.337	12.499	9.165	12.098				11.515	13.68	10.193	10.158
															10.187	13.529	9.157				15.451	9.085	10.662	10.413				9.149	12.893	6.908	10.774
															8.311	8.979	8.303				12.606	11.005	16.209	17.012				12.379	10.101	13.206	12.325
															9.351	8.734	8.838				10.847	7.804	15.961	13.802				13.572	8.092	10.158	11.79
															10.249	9.506	9.652				18.312	9.908	11.004	12.211				13.224	8.837	15.076	8.934
															9.532	12.4	9.157				17.952	10.775	10.498	11.769				15.261	9.28	11.513	8.337
															11.357	12.034	8.337				15.128	10.34	8.593	14.555				13.677	9.577	12.284	12.36
															11.186	12.885	1.514				15.854	9.156	11.623	10.063				12.192	8.632	13.292	7.514
															11.834	15.804	9.312				13.308	8.634	13.902	13.149				13.011	12.072	15.917	10.72
															12.314	16.255	7.796				12.771	9.652	13.236	8.571				12.032	8.837	13.206	10.001
															9.995	14.392	9.282				19.111	8.38	12.834	9.284				12.192	12.584	17.102	8.362
															14.211	12.86	8.094				14.176	10.98	8.19	18.566				12.262	9.696	11.293	6.162
															9.373	7.572	8.741				15.261	8.65	8.838	12.191				11.005	8.465	13.249	10.395
															9.149	14.006	10.518				10.081	10.101	7.572	15.195				11.782	11.513	17.948	9.349
															8.633	11.413	10.444				13.293	12.12	8.553	13.443				11.834	10.186	11.881	9.494
															6.981	9.652	10.842				7.666	12.585	10.039	16.436				11.552	14.25	13.07	6.069
															8.634	16.172	7.515				13.054	11.179	15.707	11.805				8.701	9.577	14.285	9.156
															8.173	13.572	9.77				13.142	10.668	11.888	11.142				10.927	7.232	13.717	7.041
															11.384	12.861	10.662				9.117	10.333	9.431	11.549				10.223	11.185	14.31	9.769
															9.637	8.466	10.526				11.357	10.519	11.479	13.802				10.452	10.72	9.958	8.632
															7.61	13.386	9.822				15.163	8.269	9.049	13.388				9.282	11.024	12.635	7.795
															11.363	8.583	9.149				12.939	13.714	8.086	11.677				7.618	8.837	6.243	11.741
															9.555	12.607	8.19				12.949	11.955	8.823	7.135				10.076	10.559	12.871	10.332
															10.525	10.08	9.102				19.277	10.472	12.834	10.526				7.215	8.632	11.513	9.994
															8.839	8.634	8.303				12.138	10.709	9.373	14.018				9.549	8.465	8.632	9.936
															11.004	9.674	8.641				14.544	10.842	10.993	9.873				8.337	13.222	18.143	8.507
															7.96	7.042	5.301				15.073	12.169	7.907	5.986				11.004	8.507	13.222	8.641
															8.935	10.687	8.782				7.073	10.186	7.488	7.671				9.399	8.048	12.854	8.998
															11.257	8.65	9.118				10.499	12.709	10.341	11.382				12.445	6.611	11.133	6.435
															12.95	8.302	7.805				12.95	11.445	12.326	14.225				16.223	7.58	12.12	8.632
															9.464	6.447	8.155				14.784	10.444	12.305	15.536				14.049	9.117	13.57	6.104
															11.365	11.539	7.184				16.119	11.243	7.572	12.861				12.721	7.072	9.958	10.72
															6.825	9.652	7.312				15.22	8.583	10.092	8.406				19.399	7.282	12.719	8.507
															11.882	9.095	9.465				14.252	12.5	12.811	11.753				14.365	7.282	16.203	7.282
															8.19	11.294	8.19				14.92	11.686	6.292	10.341				15.114	7.571	11.004	6.48
															10.251	9.465	9.282				12.209	7.495	14.049	15.974				13.714	6.96	16.967	6.469
															8.741	10.519	6.47				12.584	13.428	17.189	14.489				16.507	11.532	13.96	7.986
															10.023		8.338				15.638	8.302	9.351	14.27				12.849	10.298	14.875	8.507
															8.741		7.805				16.284	11.557	8.551	15.61				12.721	10.193	14.25	10.158
															9.212		7.233				15.26	8.149	7.577	8.406				20.377	8.337	10.332	10.395
															9.734		7.496				12.923	14.878	6.623	13.385				11.357	7.514	11.753	9.117
															10.395		10.251				6.856	13.206	8.142	16.867				14.365	10.66	13.336	9.365
															11.694		6.536				11.496	12.121	8.364	12.95				11.882	8.189	12.072	11.857
															11.142		6.825				10.669	11.677	8.57	3.861				11.557	7.232	12.937	7.609
															9.465		6.105				12.192	9.19	6.292	9.117				13.055	6.162	18.795	11.953
															10.721		8.303				11.688	9.096	9.093	10.102				8.049	9.532	12.031	8.328
															7.072		8.74				11.025	12.275	7.575	10.228				9.908	10.332	9.365	7.437
															13.224		8.38				10.842	13.268	12.403	9.35				15.528	7.804	10.545	11.255
															11.754		9.366				8.708	12.834	12.192	8.715				8.838	11.255	10.518	14.415
															10.714		11.256				15.239	11.602	9.794	9.555				13.676	9.403	13.759	17.984
															11.539		11.025				14.212	12.275	10.603	10.298				19.459	10.332	13.427	10.847
															10.229		11.686				13.429	11.751	7.727	11.882				12.586	12.606	12.231	8.405
															11.384		8.583				17.371	10.328	9.466	9.909				16.121	11.662	7.437	12.498
															9.148		8.806				10.662	10.034	10.494	9.243				12.327	8.91	10.186	13.222
															9.095		11.761				16.538	11.767	9.283	7.572				9.586	11.21	8.582	8.715
															8.741		9.373				14.901	11.201	8.086	7.458				13.781	9.732	13.48	7.721
															8.337		8.312				13.656	11.848	7.067	7.805				17.676	9.101	7.665	7.986
															7.515		8.935				15.611	13.546	10.85	7.466				16.735	12.606	14.052	11.357
															8.021		6.826				5.354	12.208	6.983	7.804				13.396	13.965	11.457	11.037
															11.365		9.651					11.774	7.98	9.829				13.316	16.061	12.77	11.388
															9.586		8.838					12.653	8.508	9.995				12.692	12.325	13.255	13.271
															6.96		7.666					11.95	10.04	7.986				12.693	9.156	11.887	7.437
															9.578		8.634					13.023	10.454	10.926				9.156	12.697	11.388	11.881
															9.873		9.157					16.222	7.457	13.185				14.415	8.465	8.649	13.394
															7.805		9.031					10.596	9.933	12.326				7.721	14.464	10.66	13.053
															8.507		8.935					12.534	8.086	10.715				13.724	12.22	10.27	11.255
															8.998		9.908					6.18	8.93	8.03				12.402	10.47	9.494	12.231
															13.863		6.698					14.134	7.686	10.332				13.336	13.816	10.545	11.513
															8.19		6.514					11.553	9.58	11.662				11.686	9.842	11.344	13.416
															7.351		9.156					12.304	7.027	6.104				11.858	12.36	11.513	10.339
															8.741		6.698					10.285	8.059	7.609				11.76	9.554	11.71	14.285
															8.337		8.466					11.955	10.176	13.443				11.457	11.971	11.692	11.255
															8.634		8.542					10.804	7.67	11.293				8.716	10.919	9.936	10.525
															7.572		9.118					13.07	9.46	9.85				6.116	12.948	9.871	13.255
															9.734		7.906					8.323	11.76	10.193				10.281	11.857	7.571	8.54
															9.212		6.448					13.829	13.603	9.637				9.193	10.606	14.39	11.363
															9.637		7.58					9.86	11.515	13.026				10.395	13.292	10.443	6.708
															10.417		12.073					11.557	10.667	13.93				8.405	12.725	10.899	12.948
															11.791		12.361					13.551	8.263	12.81				11.759	13.675	9.486	14.33
															7.467		8.87					12.883	8.57	10.98				9.464	14.33	9.486	11.185
															9.351		8.583					15	8.268	9.149					15.33	17.646	14.225
															8.83		13.443					9.175	9.282	11.382					11.612	15.958	10.66
															7.351		7.878					12.722	9.675	11.344					13.124	11.832	10.687
															10.84		8.583					14.221	8.441	13.78					12.854	11.953	14.144
															12.693		7.351					13.249	12.339	9.465					10.228	10.001	10.498
															12.12		10.194					10.863	10.097	13.077					7.311	14.23	13.07
															12.54		7.805					14.753	8.866	9.366					14.365	13.037	8.507
															8.863		7.657					12.923	10.762	9.488					11.178	9.117	7.202
															9.242		9.652					12.697	16.106	7.233					13.124	15.917	8.998
															11.39		8.19					10.559	10.04	11.057					6.96	11.388	8.268
															8.583		7.572					11.382	11.938	10.137					13.075	12.584	9.828
															10.299		6.815					12.691	6.668	8.806					14.134	13.222	8.465
															12.233		7.96					9.33	6.778	8.541					12.261	11.513	8.998
															8.129		10.06					10.547	13.807	11.515					14.25	13.899	7.311
															9.488		7.042					13.026	11.296	8.466					10.47	15.279	9.486
															11.038		11.589					14.07	6.292	9.093					9.908	8.465	7.311
															10.221		9.404					9.118	7.372	8.337					9.82	10.707	8.337
															12.079		6.709					10.715	9.404	10.984					16.317	9.486	9.28
															10.767		7.796					11.179	8.102	8.914					12.584	17.561	9.651
															10.84		8.19					8.633	9.282	8.518					9.311	16.256	7.95
															9.471		7.987					10.92	12.498	11.11					9.871	12.19	11.881
															9.242		10.714					15.96	8.635	11.297					10.76	8.2	8.302
															9.117		9.96					10.662	10.98	11.852					10.626	10.424	5.354
															10.119		11.513					13.649	10.993	11.623					12.114	9.699	9.842
															11.14		7.143					12.585	13.206	12.198					13.649	10.926	8.189
															8.337		6.961					11.851	11.693	9.996					10.827	11.434	9.769
															9.093		8.466					11.005	12.727	7.804					12.854	11.675	9.936
															11.761		9.404					13.25	13.245	9.276					10.415	11.255	9.164
															12.585		9.102					9.958	10.979	4.969					11.953	12.585	11.293
															10.84		9.085					10.334	12.697	9.948					8.837	10.348	12.12
															9.102		12.191					13.338	12.487	9.937					13.512	10.606	13.717
															10.081		10.498					8.716	11.293	9.156					11.826	10.101	14.405
															11.779		11.39					12.379	13.512	5.344					11.85	12.291	11.255
															13.384		12.487					10.334	11.851	7.373					8.74	13.697	7.804
															10.251		8.362					11.588	11.662	9.352					14.23	12.351	7.514
															10.628		9.465					13.428	9.117	10.628					6.104	9.369	6.424
															8.583		11.662					11.415	13.528	9.872					8.998	17.011	9.842
															8.708		10.187					8.708	7.796	13.224					9.403	9.43	11.826
															10.159		8.362					14.226	10.186	9.373					12.635	14.003	12.584
															9.937		9.101					14.069	9.994	9.908					5.38	10.908	6.513
															11.382		12.121					13.141	9.652	11.459					12.377	11.004	10.606
															10.769		10.298					11.887	14.545	11.539					12.22	17.796	9.349
															11.384		14.73					9.488	10.606	10.498					13.026	13.57	9.28
															10.601		11.237					9.156	8.507	12.326					11.686	8.91	9.82
															10.396		13.481					7.96	10.714	9.696					11.236	12.048	8.91
															11.888		13.07					9.96	10.774	11.539					12.86	13.141	8.328
															8.634		11.532					10.023	9.675	13.07					8.974	10.626	13.249
															8.782		11.613					9.704	11.363	13.072					11.444	10.228	8.829
															10.173		10.662					8.782	8.583	11.887					16.383	14.405	7.072
															10.229		10.333					8.911	7.721	12.098					10.66	16.848	7.543
															8.154		9.821					7.959	10.708	15					11.236	11.388	11.037
															10.221		7.282					8.838	11.741	12.025					8.092	15.203	6.824
															8.74		11.663					10.769	11.857	12.871					12.77	11.662	10.667
															12.949		9.102					14.19	12.331	9.675					12.12	15.851	11.293
															10.66		8.155					13.249	9.995	10.841					11.363	12.959	6.513
															13.718		9.653					12.922	12.72	8.65					11.826	13.037	10.84
															9.165		8.716					11.514	9.148	8.935					12.635	15.26	9.651
															8.507		9.494					14.069	11.662	8.999					13.07	11.037	11.056
															9.102		9.696					9.031	10.626	10.499					7.959	14.841	10.707
															7.572		9.555					13.444	13.418	10.979					8.302	16.295	9.494
															8.634		11.025					12.032	9.351	9.652					13.271	16.435	14.006
															9.908		9.533					7.95	12.314	10.608					9.464	15.26	12.498
															8.809		10.285					9.533	9.733	7.183					11.971	13.124	15.686
															7.467		11.084					10.002	11.588	8.508					11.857	14.464	12.959
															10.059		8.975					11.779	10.707	12.096					10.193	13.712	10.228
															9.095		8.269					13.38	12.95	7.905					12.809	10.559	11.037
															8.049		8.839					11.858	7.143	12.325					10.626	10.193	14.088
															10.332		8.102					10.715	11.882	10.667					10.687	14.563	11.056
															9.937		6.425					8.466	11.583	11.858					12.325	12.377	14.31
															7.312		8.19					9.77	10.187	8.328					8.092	10.847	10.193
															10.499		6.47					9.157	9.703	8.381					16.592	13.053	11.735
															8.338		8.19					8.974	11.791	13.591					9.471	12.921	7.609
															9.909		8.155					9.704	11.134	13.314					10.978	11.037	10.186
															7.796		7.204					10.842	11.851	11.888					14.884	10.298	9.486
															9.095		8.935					9.704	14.011	10.186					13.427	11.236	8.507
															9.211		7.351					10.547	16.062	9.675					13.919	11.662	10.978
															10.298		7.805					10.841	13.544	7.805					12.893	12.486	8.91
															6.436		9.28					12.262	11.357	15.453					11.293	10.714	11.971
															10.471		7.544					8.466	14.511	11.39					10.395	13.384	10.332
															9.373		9.365					12.209	16.105	15.087					7.58	13.862	10.158
															9.851		7.657					9.031	13.384	12.137					9.349	13.816	10.298
															12.21		8.566					9.909	7.618	14.405					15.704	10.284	8.021
															13.528		6.96					8.975	16.062	11.243					12.36	7.571	9.958
															8.87		9.149					11.388	7.457	14.049					11.004	12.871	11.388
															8.338		7.312					7.805	12.379	14.405					12.261	15.316	10.978
															10.417		6.741					6.446	9.872	14.391					12.025	9.242	11.662
															8.19		5.914					13.142	11.134	12.079					11.857	8.974	9.871
															16.492		7.637					11.44	8.935	10.688					10.298	18.798	9.732
															11.294		6.481					10.871	9.311	10.9					9.349	10.415	14.884
															8.74		5.513					11.851	8.172	12.192					7.804	10.559	9.218
															9.872		6.104					10.438	10.979	11.971					7.112	14.913	4.605
															8.583		7.951					6.778	5.766	15.592					10.186	13.443	9.403
															7.96		4.922					9.934	9.77	10.298					11.185	7.959	12.544
															10.159		7.986					9.653	7.656	9.031					8.998	8.829	9.85
															12.72		8.102					8.561	8.715	7.619					12.377	13.335	10.525
															9.937		6.612					10.847	8.362	12.331					11.588	14.068	10.332
															9.165		7.823					11.919	11.445	13.395					8.154	9.842	10.395
															10.688		7.657					14.191	8.83	10.769					11.513	14.174	9.156
															10.101		6.104					10.978	13.78	11.357					12.606	12.72	11.082
															10.417		7.987					15.818	19.115	8.998					11.082	17.796	9.464
															10.472		8.634					11.496	15.238	12.139					9.871	13.378	10.66
															7.282		6.267					10.334	10.298	11.857					9.156	15.809	10.395
															8.741		12.419					11.256	11.779	9.872					10.606	13.717	8.715
															9.872		9.652					14.09	8.83	11.057					10.919	16.172	9.871
															12.032		12.586					12.538	9.937	8.633					7.571	12.871	8.302
															9.118		11.539					11.882	7.272	12.221					7.618	16.868	9.936
															8.708		8.838					11.135	8.328	8.83					6.98	15.562	9.349
															9.211		12.938					13.3	8.337	10.499					9.732	17.22	10.84
															9.148		7.986					16.437	15.261	8.022					12.19	11.237	12.809
															10.607		10.173					15.523	10.92	7.986					6.513	14.899	9.093
															12.121		9.958					10.92	12.208	6.98					8.154	14.701	10.193
															7.113		11.344					13.185	10.395	13.075					12.19	12.95	12.809
															8.466		12.221					9.031	13.444	8.741					11.382	13.961	10.298
															13.885		11.005					12.585	12.209	11.782					12.4	16.097	9.958
															10.9		12.12					14.727	12.699	9.671					10.058	12.544	11.363
															13.885		7.272					14.415	9.829	9.2					9.958	13.075	11.236
															13.444		8.715					10.194	8.155	8.402					9.908	10.688	9.871
															11.345		12.878					11.365	12.326	6.838					9.349	13.185	11.588
															7.496		11.513					11.135	14.069	9.507					7.804	10.101	6.824
															9.031		11.741					10.25	11.581	8.999					12.031	14.089	11.887
															12.772		8.406					10.334	9.843	10.924					14.189	12.72	13.184
															9.465		9.821					11.514	12.725	9.181					8.707	13.718	9.828
															7.666		6.622					10.709	12.921	11.038					8.405	8.465	9.732
															11.688		8.508					11.39	8.837	10.146					8.465	14.568	14.763
															10.019		10.024					10.545	12.893	9.156					8.172	12.454	11.004
															8.805		11.741					10.222	9.696	10.092					8.101	12.861	12.876
															9.734		9.28					11.532	11.779	7.437					13.965	15.453	14.285
															13.224		10.194					10.417	11.76	8.434					10.626	8.19	16.422
															8.155		8.155					11.18	14.934	12.107					6.209	15.22	10.66
															12.026		14.415					13.126	12.539	11.015					7.721	16.697	14.088
															11.515		9.652					10.608	13.68	8.053					6.824	13.714	12.19
															11.589		8.715					11.539	11.037	9.962					10.498	13.6	10.767
															9.96		12.534					13.675	11.457	10.555					11.588	10.471	13.554
															10.709		9.937					13.12	12.876	8.977					5.778	12.137	9.577
															9.653		6.981					13.63	10.47	10.495					6.346	7.282	10.001
															8.303		6.469					11.364	13.883	9.322					11.255		8.54
															12.032		5.628					13.717	6.267	10.329					12.691		14.027
															11.515		6.815					13.055	9.828	11.658					8.302	9.816	11.581
															8.303		14.053					12.418	13.055	8.166					11.133	6.475	9.584
															10.472		8.838					12.498	12.192	8.57					4.766	14.983	7.665
															10.827		11.539					10.298	9.085	9.778					8.815	12.582	8.632
															8.19		6.825					12.21	11.779	10.84					5.877	10.683	11.178
															6.908		5.273					10.34	10.376	10.47					8.154	11.987	9.464
															9.28		11.244					13.649	8.054	9.087					5.249	10.204	10.767
															8.173		10.715					15.608	11.265	9.875					4.499	12.326	10.332
															7.804		9.996					14.134	12.303	9.35					11.887	12.08	11.363
															9.212		13.386					10.709	9.373	11.601					12.313	11.761	12.691
															6.981		7.951					12.487	8.228	7.592					13.222	11.72	8.805
															7.202		9.102					11.004	9.745	9.365					9.958	9.925	10.926
															10.194		11.084					12.921	8.381	10.424					10.47	14.488	12.697
															8.338		8.338					15.809	7.707	9.683					11.79	15.336	7.182
															8.634		8.156					10.545	9.697	10.223					10.774	13.384	6.469
															8.19		8.191					14.727	8.303	8.56					11.588	13.514	10.626
															9.487		9.366					9.938	7.067	6.562					11.538	13.781	9.085
															9.242		8.542					10.979	12.852	7.442					13.119	11.646	12.331
															8.838		8.708					10.471	7.283	10.581					12.4	10.843	10.221
															10.848		8.839					8.87	12.34	9.142					9.828	14.85	11.388
															9.578		7.96					11.293	10.657	8.507					10.847	12.167	6.814
															7.904		8.129					10.607	12.874	10.167					8.128	11.026	11.185
															7.609		9.653					13.12	10.194	7.304					11.21	10.44	5.778
															8.338		9					16.32	16.097	11.255					13.394	12.872	8.021
															8.508		8.094					12.137	8.734	8.059					13.443	11.646	15.447
															7.272		7.666					12.546	9.471	9.72					11.004	11.384	6.435
															11.082		7.987					14.25	13.572	6.89					9.908	12.569	12.876
															11.057		9.15					13.336	7.45	9.064					11.363	12.985	8.91
															10.023		7.184					10.687	8.808	9.571					13.244	14.766	11.938
															8.715		9.578					11.76	8.053	7.515					13.026	11.341	14.546
															9.095		8.863					10.92	7.927	8.459					10.84	15.444	14.7
															7.572		8.278					12.049	9.584	6.825					14.047	10.862	11.434
															7.96		8.304					11.39	9.351	12.208					11.953	8.554	13.666
															9.578		8.191					12.699	12.534	10.923					6.469	8.586	9.218
															7.878		8.634					11.057	9.199	9.373					5.42	9.735	10.193
															7.283		8.936					11.614	13.551	9.466					11.255	11.72	8.465
															6.826		7.61					12.693	7.314	7.986					14.494	14.491	11.918
															8.74		9.465					12.607	9.512	7.488					12.893	10.563	10.935
															10.187		8.508					10.341	13.682	6.096					14.25	13.787	9.67
															8.269		8.049					11.688	11.135	6.266					13.759	9.2	15.114
															7.042		8.839					13.037	6.981	7.665					10.525	12.54	13.919
															6.612		7.906					10.194	7.095	8.716					10.228	11.786	6.944
															8.035		7.96					11.737	8.402	8.838					13.206	10.616	10.06
															7.35		7.572					11.134	6.89	7.761					11.759	13.819	12.77
															7.042		5.792					9.118	6.562	9.26					13.053	15.713	8.715
															7.042		8.023					9.872	13.761	7.143					12.19	13.338	12.584
															6.448		7.273					11.955	14.692	6.96					11.082	9.816	13.335
															10.299		6.105					11.243	14.373	8.815					9.554	6.037	6.856
															9.157		8.338					9.704	12.653	7.63					8.048	15.26	6.435
															4.921		10.669					13.651	18.551	6.882					15.686	10.676	10.101
															8.102		10.445					12.377	16.952	8.507					12.19	9.918	9.156
															9.995		9.96					13.781	9.244	14.09					12.36	10.314	7.986
															8.337		9.313					10.444	12.079	9.404					9.994	7.155	7.58
															9.311		8.584					11.612	8.538	13.9					13.633	12.031	11.356
															10.417		8.741					12.601	13.403	8.782					10.498	10.432	9.936
															9.873		7.805					8.049	10.076	12.261					10.186	17.953	12.377
															9.584		7.987					11.851	10.229	11.755					12.231	10.495	11.581
															8.716		7.796					11.858	10.816	11.755					9.464	11.741	11.356
															7.582		10.194					13.427	10.444	11.779					11.759	11.038	12.284
															10.334		8.806					11.515	10.941	15.811					11.255	15.077	8.974
															7.906		6.95					11.14	10.84	15.536					9.242	11.694	9.211
															9.577		12.939					12.725	11.014	10.193					9.372	12.602	9.28
															10.66		9.118					12.137	8.709	11.688					6.772	10.498	8.507
															9.365		9.996					10.707	11.079	14.211					9.732	8.362	9.82
															7.657		10.709					9.311	12.152	11.135					7.959	13.143	8.328
															11.365		5.628					9.085	10.194	10.607					9.908	16.527	8.739
															8.312		6.981					11.614	15.163	8.911					12.893	18.396	7.904
															10.26		7.582					10.519	9.704	14.768					8.053	14.064	9.156
															8.303		7.796					12.601	12.95	10.715					4.914	12.538	7.571
															8.465		6.826					12.232	10.688	10.688					12.056	9.668	8.739
															8.312		9.157					10.978	10.193	12.699					5.766	16.332	8.507
															10.518		6.347					10.626	10.417	10.471					13.222	11.987	7.466
															6.708		9.496					10.519	8.268	12.959					8.154	15.667	8.101
															8.406		12.608					14.21	9.28	12.873					12.36	12.974	8.998
															9.871		9.496					13.245	11.005	11.779					5.778	11.86	7.609
															6.824		7.657					11.851	9.101	11.514					6.611	12.038	8.974
															9.703		6.612					9.697	9.872	10.299					5.877	11.509	7.232
															9.148		10.527					10.599	11.256	9.465					11.363	11.243	9.28
															7.721		10.187					9.101	10.444	11.024					11.363	14.046	11.037
															6.857		11.663					10.769	12.894	12.36					9.311	13.409	11.759
															7.543		9.638					10.285	15.374	10.547					7.665	12.962	9.494
															8.998		14.978					14.745	9.28	11.887					6.469	9.421	9.292
															5.301		12.419					6.95	13.722	8.838					10.525	11.887	10.84
															8.154		11.515					12.499	9.494	12.026					8.465	11.316	10.74
															9.578		11.459					10.285	10.707	11.888					8.582	9.713	9.554
															7.95		10.024					8.633	12.261	12.191					9.349	10.097	9.936
															8.329		10.527					9.165	9.651	11.694					9.164	11.92	7.665
															8.465		9.851					12.402	13.528	9.473					8.715	11.614	6.243
															7.805		10.299					7.805	10.298	9.578					9.82	13.896	5.628
															10.193		8.741					9.494	9.908	9.77					10.525	13.1	5.354
															8.716		9.15					10.47	14.365	10.186					13.244	8.19	8.805
															8.19		11.496					9.464	14.622	11.082					6.74	17.271	7.571
															11.363		13.055					6.95	12.725	10.709					8.302	16.489	10.298
															9.697		8.806					11.514	13.337	8.975					9.577	9.697	6.824
															11.858		7.283					10.417	13.053	9.908					6.3	5.914	4.316
															10.445		5.89					10.979	8.102	12.607					10.001	16.438	8.03
															13.186		10.23					11.14	9.697	10.707					10.667	14.94	7.721
															8.716		11.852					10.102	11.741	11.459					9.117	17.796	7.272
															10.722		8.466					11.852	11.495	12.726					6.435	16.083	10.158
															11.415		10.223					11.614	7.042	11.514					13.075	15.89	6.824
															11.038		11.187					8.999	9.908	14.564					10.667	8.782	9.871
															9.697		8.103					12.139	12.049	9.822					9.403	11.005	6.104
															12.379		8.716					11.882	8.641	11.388					9.577	14.008	6.708
															11.398		11.761					11.539	15.13	13.57					9.117	15.343	8.805
															10.643		7.458					13.593	18.096	11.827					8.998	11.94	8.632
															8.899		8.508					8.364	13.12	11.212					10.228	14.378	7.609
															10.842		7.906					10.34	13.12	12.327					8.715	13.011	8.337
															10.396		11.828					9.703	8.302	8.173					7.072	14.59	6.424
															11.92		12.333					11.344	16.815	11.827					9.577	14.06	5.913
															8.508		8.567					9.282	11.024	11.663					9.464	16.038	7.112
															9.573		7.96					11.852	11.005	6.612					5.678	13.555	7.112
															12.422		7.204					12.169	8.871	8.094					6.435	11.741	7.041
															11.417		6.815					7.805	11.255	10.608					5.079	13.816	6.824
															9.701		9.212					11.18	8.566	12.049					6.057	11.603	4.316
															10.576		8.338					11.006	12.811	7.878					9.554	10.682	5.313
															10.049		11.056					9.22	10.98	10.842					10.525	12.449	8.715
															11.914		10.251					12.12	14.012	7.467					8.805	11.398	7.192
															8.954		8.741					9.242	9.28	8.022					5.925	10.792	6.3
															10.616		11.39					15.668	13.962	9.704					12.532	13.365	7.232
															7.631		7.458					11.004	12.726	11.345					8.465	10.48	9.156
															7.156		11.39					9.293	12.314	12.032					9.554	10.79	6.622
															7.908		11.257					11.037	11.686	11.858					10.298	7.77	11.759
															13.313		7.113					11.93	10.687	9.696					11.971	9.908	10.626
															11.562		8.508						11.514	12.169					6.824	11.037	8.337
															10.472		6.961						15.152	8.086					6.069	8.246	8.021
															10.689		8.936					12.23	10.767	8.977					6.104	11.357	8.302
															7.796		9.533					13.717	9.148	8.128					8.974	10.657	7.041
															6.966		13.53					11.556	9.164	9.118					8.641	11.986	9.148
															9.284		13.963					16.171	9.696	7.501					9.117	11.459	13.184
															9.817		12.546					13.553	7.805	11.11					7.571	12.056	11.494
															10.603		11.006					12.119	12.692	10.454					6.949	13.099	12.635
															9.473		9.366					11.953	10.92	7.285					8.87	11.546	10.395
															9.496		9.909					14.743	11.753	9.048						13.546	12.031
															11.295		13.397					12.725	5.691	7.405						9.646	8.465
															12.419		9.653					12.651	9.596						13.222	12.496	8.862
															10.299		9.366					13.763	13.017						14.898	12.274	6.949
															8.976		11.358					15.561	11.682	12.979					12.064	12.391	10.606
															11.973		7.184					14.415	9.905	10.924					9.842	13.29	12.114
															9.938		8.173					9.156	13.41	9.21					13.59	7.365	11.133
															15.454		13.546					11.692	10.425	9.673					9.392	8.769	8.54
															12.192		12.878					14.046	7.404	11.15					10.948	9.398	8.739
															11.515		9.873					12.33	8.086	11.521					14.947	10.059	12.135
															9.909		11.955					14.088	7.564	10.21					9.955	9.282	14.899
															9.118		8.466					14.627	10.238	11.826					15.194	5.941	10.714
															11.187		8.399					15.409	8.337	8.11					13.527	8.873	8.862
															11.883		12.122					14.782	10.44	10.085					12.252	13.899	11.363
															11.761		10.194					13.184	9.558	11.531					14.769	9.464	9.532
															6.857		7.987					13.716	13.235	8.876					10.957	6.448	9.871
															9.851		12.939					11.056	9.487	7.336					13.555	8.519	8.311
															10.472		11.006					11.036	10.307	8.324					14.99	10.66	9.03
															11.295		12.488					12.377	9.065	9.255					12.701	11.237	9.093
															11.694		13.3					11.363	10.246	10.207					12.135	8.38	8.172
															8.508		8.508					12.538	9.908	9.576					12.497	11.496	12.809
															6.612		14.877					13.036	11.175	6.98					13.937	10.298	8.54
															10.23		14.136					10.394	11.741	7.675					9.846	11.694	8.707
															11.365		13.901					11.686	9.653	10.346					14.285	11.76	10.298
															11.446		7.722					12.532	10.989	9.748					10.248	12.885	8.507
															9.22		12.699					10.84	10.444	13.591					11.342	14.055	9.156
															8.023		11.973					11.388	9.252	13.074					12.053	11.185	9.703
															11.852		9.405					11.21	7.706	11.133					12.064	11.434	8.337
															11.212		9.873					10.84	8.45	14.249					8.48	10.168	10.626
															6.448		9.844					15.903	9.415	12.809					16.312	11.364	8.998
															10.417		12.699					13.249	7.373	11.363					10.35	6.481	9.349
															16.425		12.286					14.84	7.282	9.957					9.141	10.06	10.606
															7.805		7.722					12.892	7.665	11.513					12.053	9.211	8.362
															8.806		13.418					15.759	13.068	9.554					8.923	8.863	9.958
															13.17		10.341					11.293	8.561	11.003					8.614	13.037	8.934
															9.697		8.542					10.227	10.791	13.763					8.389	13.571	10.847
															8.806		10.662					13.394	8.97	11.74					10.173	13.038	11.79
															12.923		8.466					10.524	7.77	10.854					10.35	9.675	7.311
															10.23		6.436					11.692	9.995	10.614					12.307	9.822	8.715
															11.365		5.628					10.524	9.877	12.322					10.136	11.446	12.114
															5.878		6.163					10.518	6.163	15.126					11.255	12.699	10.082
															11.737		7.351					9.531	9.311	11.783					11.337	13.655	9.584
															9.996		7.572					12.119	9.744	15.351					14.017	17.037	6.611
															8.976		9.282					7.803	11.46	10.898					11.176	11.588	7.571
															9.996		8.304					9.092	10.514	6.078					8.355	14.415	9.218
															10.299		7.458					9.842	12.392	12.314					10.095	12.192	10.626
															8.584		11.142					15.525	12.48	16.253					7.266	12.922	8.974
															10.986							17.466	8.227	12.868					10.248	9.085	9.372
															8.673							11.79	13.285	6.434					11.904	12.098	8.934
															11.559		9.183					11.023	6.692	17.901					10.781	9.872	9.211
															10.628		7.113					8.465	8.381	9.662					10.713	13.718	9.03
															7.572		8.172					14.173	12.093	11.653					10.248	11.038	7.272
															14.009		8.356					12.325	5.944	12.868					11.337	12.653	5.38
															8.094		7.909					9.695	9.597	13.769					14.06	15.597	11.532
															12.327		12.403					12.024	7.726	10.707					11.401	9.494	9.372
															10.194		9.095					9.936	6.741	7.427					14.209	12.114	6.98
															8.567		7.734					15.921	12.317	13.468					13.937	14.027	9.85
															8.032		7.805					9.651	10.738	10.736					13.028	10.628	5.766
															9.556		12.684					8.405	12.822	14.119					12.116	10.34	7.904
															8.716		9.049					8.805	11.02	12.529					12.095	13.883	9.994
															7.768		9.963					13.898	15.114	17.227					11.207	12.079	8.465
															11.025		11.295					10.023	12.983	12.793					11.559	13.962	8.405
															10.23		7.926					8.328	15.388	13.489					12.14	13.786	8.837
															10.285		10.454					11.133	9.373	8.513					10.899	12.894	14.047
															9.533		9.721					11.334	10.244	6.662					13.249	14.725	11.056
															13.719		6.084					9.942	10.716	14.531					11.829	16.593	10.899
															11.238		8.247					12.532	8.033	13.162					9.148	16.059	11.037
															8.269		8.979					11.971	10.862	10.722					7.86	11.037	11.786
															8.049		8.297					14.563	7.665	13.562					12.327	10.194	9.117
															8.129		7.558					12.898	13.009	8.052					12.469	13.244	10.003
															7.987		9.087					7.688	9.504	12.779					12.537	6.436	9.636
															11.358		8.57					9.673	9.532	11.6					11.457	9.212	8.566
															9.157		9.758					15.363	11.81	12.681					7.981	9.577	10.298
															8.466		8.65					9.603	8.299	11.821					7.774	12.454	8.465
															8.238		10.427					13.741	11.953	14.637					9.696	11.761	8.302
															12.851		8.621					11.342	10.979	11.742					14.287	10.519	8.632
															9.212		9.838					16.128	10.863	9.659					10.611	17.221	8.128
															10.696		7.5					12.181	10.518	13.413					11.799	12.699	11.037
															10.187		8.805					11.069	4.819	7.888					14.447	14.465	9.486
															7.184		7.734					8.139	12.894	11.069					11.816	14.19	15.085
															9.212		7.96					13.089	10.841	13.161					9.945	13.428	14.068
															10.842		7.366					11.13	9.871	12.139					12.314	13.427	13.249
															8.542		7.971					8.584	14.491	12.43					11.772	9.467	9.372
															7.273		6.765					12.137	16.173	11.968					7.491	10.863	10.47
															9.844		6.18					10.541	9.77	11.201					10.863	10.103	12.725
															8.936		7.61					11.063	16.735	13.089					11.912	9.465	9.769
															7.906		7.852					10.05	12.872	7.663					8.389	10.01	9.486
															7.768		9.801					10.22	14.702	9.8					9.984	13.038	13.416
															9.771		9.281					11.023	12.811	12.681					12.959	9.471	6.535
															9.212		9.637					12.572	12.285	13.723					10	15.397	10.284
															8.103		9.187					12.021	7.95	11.175					15.961	13.476	7.282
															9.095		9.995					12.648	9.156	11.872					11.557	15.416	9.164
															11.135		13.771					15.062	11.761	11.633					12.868	13.571	7.282
															12.586		10.567					13.224	9.373	11.968					11.521	15.069	5.691
															7.96		9.918					12.427	9.69	9.819					9.54	12.311	10.827
															11.515		14.718					10.374	8.311	11.789					10.887	14.197	7.618
															8.466		11.882					13.678	9.655	9.349					11.255	8.228	10.47
															11.358		10.595					7.571	7.423	11.255					9.62	11.435	10.332
															9.873		8.641					12.324	12.449	14.724					11.13	12.877	8.507
															10.194		10.506					10.295	8.508	11.513					12.127	11.554	10.443
															8.049		10.376					11.003	10.415	10.524					8.829	13.666	9.936
															8.364		11.693					10.647	8.173	9.148					11.359	10.751	10.687
															9.734		10.096					12.53	14.33	14.627					10.539	14.815	11.832
															8.634		11.336					12.021	9.937	9.186					8.987	13.53	10.919
															7.351		10.652					9.8	10.334	11.038					11.087	10.52	12.937
															7.515		10.425					15.35	12.894	12.881					11.669	10.791	11.178
															8.466		11.203					10.076	13.443	10.934					10.136	12.044	7.112
															7.351		11.406					10.647	11.832	10.614					8.815	14.886	9.365
															7.987		6.791					9.54		7.884					12.156	12.868	7.232
															9.243		8.574					13.334		8.919					12.307	11.854	8.405
															7.458		7.576					12.486	14.863	10.173					10.852	10.328	9.577
															9.586		9.595					14.188	12.121	8.359					10	10.537	8.632
															6.981		11.209					12.304	12.023	7.111					10.145	12.039	8.405
															8.103		12.873					11.556	9.772	7.981					10.248	7.216	8.021
															8.584		9.019					10.047	11.315	10.707					10.781	10.757	7.804
															8.936		9.501					11.2	10.049	8.76					10	14.558	8.311
															6.612		8.92					9.255	11.949	6.819					10.019	7.631	11.85
															5.986		6.945					8.355	12.975	6.207					10.101	12.569	7.571
															7.467		9.501					12.375	9.586	12.327					10.713	8.218	6.824
															8.831		11.019					7.675	6.981	6.384					12.197	12.873	9.936
															8.806		13.592					10.301	10.717	10.393					9.5	11.971	10.926
																	9.366					11.129	9.772	13.807					12.466	10.495	9.148
																	8.333					9.916	12.8	10.448					9.61	13.676	10.667
															10.626		9.661					9.14	13.864	9.5					11.816	10.37	9.577
															13.781		11.106					12.417	12.8	12.95					10.737	11.245	10.08
															10.927		10.109					10.175	12.056	9.259					10	11.246	7.721
															13.96		7.072					7.306	11.769	11.176					8.923	10.682	11.832
															10.059		12.208					12.966	11.025	14.263					11.342	7.825	11.344
															11.791		10.837					13.13	14.342	7.688					12.242	12.829	10.545
															12.026		13.176					12.079	15.22	9.593					9.255	10.735	9.494
															11.737		8.838					12.966	12.386	4.854					11.096	11.846	10.193
															9.465		12.191					9.494	12.564	8.267					12.062	12.003	9.311
															10.159		10.697					10.439	9.37	14.033					13.658	10.896	9.651
															10.715		10.407					12.528	8.993	10.22					12.265	14.248	8.465
															12.361		9.801					8.593	8.999	10.995					12.407	10.513	8.337
															10.299		13.386					10.327	13.402	7.827					15.462	12.494	11.004
															8.021		10.001					13.862	10.285	8.111					19.873	11.038	8.934
															15.444		16.188					11.936	7.989	8.76					13.213	11.817	13.712
															10.471		8.583					10.228	8.247	10.136					9.099	10.657	11.413
															11.038		9.555					10.987	7.116	10.855					13.962	12.894	10.84
															10.847		12.895					12.339	12.285	12.709					13.859	13.787	10.774
															12.209		9.495					9.801	8.716	10.71					13.028	9.464	8.362
															14.841		13.63					11.777	11.46	13.432					10.76	12.872	9.349
															13.386		9.473					8.888	11.514	7.336					13.232	9.283	12.876
															8.862		12.895					10.697	16.555	9.62					11.742	11.887	8.337
															16.066		9.937					13.12	11.663	10.957					12.649	12.039	7.986
															14.43		8.173					11.85	9.102	11.435					12.374	12.962	11.753
															11.792		12.811					11.395	12.073	9.429					11.493	11.39	14.975
															13.141		8.708					12.697	11.561	11.446					13.999	14.702	10.193
															9.584		11.079					11.269	13.129	11.928					11.201	15.465	9.494
															12.81		11.365					11.597	12.117	11.201					14.387	13.781	10.76
															12.327		11.142					9.974	10.194	10.145					14.234	9.212	5.913
															12.21		9.533					12.955	12.239	7.692					9.523	12.121	7.35
															10.715		9.844					13.55	9.616	12.208					10.593	11.761	11.255
															10.92		11.415					9.771	8.247	13.637					13.038	15.651	12.284
															11.515		8.385					9.292	10.56	11.51					10.173	13.765	13.292
															11.237		10.04					8.006	10.85	10					13.742	11.135	12.921
															11.142		9.144					5.535	8.716	8.919					13.225	7.768
															12.872		9.889					10.767	10.01	11.435					12.252	10.298
															15.22		9.34					11.662	12.8	10.934					14.7	8.032	9.486
															11.663		9.773					15.102	11.117	7.474					10.405	8.303	12.208
															11.889		7.489					11.3	10.687	9.61					11.997	12.079	8.836
															11.852		6.07					14.06	7.96	9.486					9.855	11.255	11.342
															9.212		9.351					12.466	13.865	10.123					11.872	13.12	10.781
															12.139		10.744					12.701	11.36	12.848					10.722	13.245	12.021
															11.539		7.764					16.171	12.391	9.829					14.119	12.601	10.746
															10.559		8.049					12.208	10.955	8.76					10.713	13.185	8.389
															9.586		8.751					13.73	14.186	9.368					12.659	16.437	9.029
															12.379		8.131					11.88	12.353	10.722					8.595	12.079	8.58
															8.542		10.223					17.066	10.804	11.178					12.417	13.385	9.117
															11.662		9.282					14.672	9.696	9.855					11.081	12.36	11.255
															8.364		6.604					9.422	8.953	8.216					11.337	16.332	9.286
															10.547		9.138					9.255	9.025	9.117					11.201	15.564	9.422
															11.256		11.176					7.427	11.732	8.614					11.038	10.775	6.888
															11.255		7.971					9.8	12.274	8.139					7.638	12.95	9.603
															10.173		7.451					10.347	9.816	8.625					14.812	10.828	11.07
															6.981		9.065					10.057	9.421	7.725					7.86	12.073	11.904
															12.584		8.034					12.032	11.298	7.742					10.375	12.856	9.036
															10.396		8.191					11.864	7.733	9.12					11.269	11.955	8.584
															11.415		10.583					13.411	16.468	9.338					10.569	15.608	9.923
															10.601		8.032					11.457	14.575	8.461					8.332	9.844	8.779
															11.212		10.097					14.135	10.035	8.4					13.999	12.377	9.029
															14.176		11.442					9.855	11.294	11.601					12.182	11.515	9.061
															9.653		8.978					14.017	13.885	11.201					11.625	12.12	12.242
															8.715		9.488					13.318	12.153	8.24					10.674	14.875	5.27
															8.302		12.153					12.376	9.398	10.855					11.707	11.134	8.111
															9.674		6.943					17.811	13.734	10.674					11.633	14.19	8.189
															11.006		11.5					15.247	14.145	10.602					11.356	11.457	9.279
															10.194		11.362					16.774	10.616	11.634					15.915	10.761	8.632
															11.294		8.219					15.146	10.882	9.255					10.356	9.366	10.276
															10.687		11.257					15.691	12.483	7.84					13.277	11.882	10.76
															16.597		9.031					10.614	15.686	12.848					8.951	10.761	9.28
															10.842		8.825					10.384	14.438	9.117					9.8	8.303	8.45
															10.769		8.317					13.937	12.239	8.216					10.248	13.38	8.211
															13.723		8.912					10.173	11.588	13.825					10.695	14.465	9.093
															10.152		8.46					12.618	8.808	14.864					11.07	12.949	9.859
															10.865		8.149					13.999	11.603	10.863					9.945	15	8.951
															11.246		8.571					11.601	13.049	9.696					6.79	12.314	17.239
															12.307		8.032					14.403	11.719	9.993					8.962	12.5	12.53
															11.634		7.422					10.347	13.445	11.173					11.581	10.519	10.396
															11.611		10.555					10.647	11.761	11.426					13.397	10.901	13.712
															9.394		7.572					9.255	16.279	11.064					10.957	9.872	11.579
															12.181		5.896					12.116	10.941	12.553					12.498	10.827	15.534
															8.049		7.91					12.19	11.511	11.312					12.697	8.999	15.218
															10.674		8.948					11.141	8.604	7.742					13.314	11.025	11.421
															8.081		9.049					9.449	15.173	6.944					12.325	12.585	14.526
															11.495		9.293					15.119	10.882	10.79					11.388	11.858	10.855
															10.376		8.98					9.089	18.342	9.643					14.006	11.257	13.241
															10.211		8.032					15.394	13.792	11.312					11.881	11.363	12.242
															11.514		8.28					13.325	13.129	12.307					10.332	12.031	9.855
															10.347		9.324					10.375	13.692	7.111					15.917	11.345	11.581
															9.12		10.901					14.42	9.721	8.93					7.721	16.332	13.59
															9.664		9.597					10.457	11.005	11.601					12.03	11.612	14.65
															9.117		11.068					13.318	11.951	11.957					17.014	6.347	14.639
															12.389		7.615					13.244	10.479	9.422					11.559	10.158	13.658
															10.098		13.17					12.486	11.986	13.567					9.894	13.962	9.696
															9.379		13.162					14.174	12.762	11.634					12.182	14.332	9.741
															9.366		7.953					16.604	13.756	10.713					11.971	14.976	6.104
															11.864		5.767					7.774	11.183	12.709					15.665	13.921	9.61
															12.977		7.666					12.208	10.244	13.88					12.376	13.142	16.064
															11.829		9.638					9.429	7.819	17.415					9.422	13.593	11.936
															13.665		8.584					12.389	7.825	15.746					13.997	10.688	12.881
															10.874		9.935					11.278	17.044	9.338					13.79	9.637	8.389
															8.626		7.501					12.21	14.726	9.103					12.265	8.999	10.375
															8.127		10.177					9.368	16.083	9.422					13.834	14.029	11.004
															11.994		6.862					11.821	8.155	11.024					11.51	8.838	11.457
															11.339		7.196					9.338	11.038	9.842					14.017	10.334	10.395
															12.211		14.843					11.061	12.95	12.415					11.278	13.899	11.356
															11.785		11.324					7.03	12.327	10.76					13.416	9.404	11.953
															12.882		8.839					12.674	9.366	9.942					11.691	10.92	11.547
															10.856		7.844					12.674	7.194	10.298					11.334	8.741	9.66
															9.09		11.39					8.833	14.211	14.633					14.387	5.628	10.83
															11.894		9.838					12.119	10.059	11.201					14.672	11.237	14.069
															9.351		8.889					8.951	13.255	7.688					15.754	11.693	10.835
															9.484		8.036					13.48	8.838	10.301					14.587	7.272	12.239
															9.896		9.528					15.085	10.92	9.148					11.85	13.244	13.956
															8.703		7.575					12.977	9.704	9.932					11.653	11.057	15.531
															10.406		10.033					10.713	14.391	8.189					12.932	10.721	15.527
															10.996		9.183					9.709	9.117	9.307					13.889	13.443	13.641
															10.923		10.591					12.428	10.229	9.696					12.92	8.583	20.26
															8.633		9.276					13.356	16.968	12.376					10.05	15.448	10.193
															11.279		8.023					7.675	9.995	10.347					12.92	8.83	13.492
															9.339		12.327					11.772	7.805	9.286					12.458	9.157	11.396
															10.298		8.508					12.116	10.9	9.523					10.707	12.121	8.898
															11.256		7.004					7.791	10.547	8.08					13.461	13.931	8.191
															9.817		10.194					13.104	10.444	13.347					12.621	9.958	12.03
															11.179		10.266					13.489	6.825	12.771					12.208	13.142	11.435
															10.648		5.331					13.88	10.444	9.894					10.542	11.142	18.55
															10.125		7.96					13.454	9.28	8.833					12.681	14.211	11.25
															9.339		15.363					11.666	12.515	9.513					9.829	12.032	10.707
															6.931		11.271					11.612	10.901	10.375					16.729	12.048	9.989
															8.14		12.046					14.821	11.743	10.713					10.173	12.849	13.755
															11.15		12.92					10.173	13.481	11.255					14.692	12.326	11.791
															11.384		9.399					13.249	11.973	13.96					8.836	13.024	10.926
															10.613		7.906					9.673	9.937	13.174					10.919	10.415	12.717
															9.122		6.571					6.706	10.628	10.995					9.643	15.262	7.621
															7.126		9.58					10.713	9.212	6.795					11.532	15.584	10.362
															8.19		10.445					9.8	10.901	14.754					11.13	18.297	10.158
															10.613		9.52					9.751	9.578	11.634					12.769	10.285	13.92
															10.086		9.513					12.741	12.402	10.101					9.186	13.142	12.704
															11.302		6.981					11.653	9.488	13.712					14.242	8.031	11.36
															9.431		6.364					11.412	10.103	11.236					10.76	10.444	10.244
															10.077		8.381					9.31	9.844	15.521					11.244	12.653	9.292
															8.08		8.175					11.244	8.542	14.543					9.483	16.494	10.033
															8.702		7.007					9.211	8.094	16.759					8.483	11.662	11.948
															8.93		11.227					7.336	8.032	13.168					10.22	17.481	7.105
															9.802		9.031					10.347	10.901	16.069					11.018	13.142	20.492
															9.846		8.312					10.746	11.761	15.818					10.47	14.09	9.947
															9.801		9.284					10.211	9.243	10.626					8.898	10.545	14.068
															8.634		7.771					11.024	13.072	15.142					11.058	14.027	8.503
															10.651		7.987					10.899	9.652	11.612					11.651	16.38	10.362
															11.097		9.282					11.178	11.76	16.604					11.753		14.556
															9.104		8.228					13.562	9.095	16.883					10.722		10.033
															6.31		13.409					16.224	9.488	18.233					12.486	17.127	10.186
															8.345		12.122					13.723	8.998	11.255					13.44	15.069	10.497
															12.96		10.61					12.458	8.364	9.349					13.66	14.649	8.218
															10.897		8.317					12.466	8.405	9.532					10.047	13.663	8.268
															12.869		11.415					9.46	8.362	11.185					9.5	17.948	14.861
															10.873		11.29					9.894	11.057	14.415					12.893	13.251	7.879
															9.994		12.82					11.968	10.284	14.006					13.241	13.724	6.98
															9.61		15.146					7.9	7.582	14.088					8.951	13.948	6.98
															15.016		10.247					12.53	11.533	10.66					9.186	16.091	10.06
															8.863		10.445					11.081	11.005	9.85					10.173	12.355	12.162
															11.18		9.452					13.723	10.721	15.686					11.707	20.642	16.118
															14.916		8.97					10.396	9.212	12.072					11.061	12.208	11.737
															12.08		9.771					13.772	12.585	15.562					10.599	15.753	12.258
															9.496		10.521					8.89	9.937	12.697					12.281	9.556	10.362
															10.445		7.96					8.465	11.649	17.658					10.855	9.844	10.453
															10.709		10.087					12.032	9.584	15.813					12.55	11.446	10.133
															9.873		8.615					12.851	10.395	13.816					10.65	10.555	14.216
															9.705		9.15					8.691	10.471	7.282					9.029	11.548	14.297
															9.465		8.747					12.374	5.628	18.901					12.628	10.616	8.815
															14.916		14.624					8.89	9.958	11.21					11.156	9.106	8.872
															11.346		13.164					9.429	8.837	14.937					11.404	10.349	12.119
															8.782		12.21					9.378	7.272	14.134					11.244	9.653	13.255
															12.951		10.228					10.934	10.284	16.725					12.573	10.261	10.332
															11.038		7.572					8.434	10.721	11.753					15.259	12.281	9.673
															9.366		5.536					7.981	10.662	7.192					11.904	14.138	10.894
															12.263		15.813					8.465	9.532	10.228					11.772	18.008	10.412
															11.54		13.169					10.359	9.117	11.14					9.486	11.753	10.187
															9.996		13.04					9.145	10.92	13.168					13.901	12.872	7.538
															12.098		9.995					12.116	8.634	10.774					14.033	7.907	8.829
															11.889		13.135					12.53	9.118	9.651					14.672	11.129	10.249
															7.906		11.361					11.912	8.032	9.936					15.096	10.012	10.494
															10.334		9.645					12.871	8.466	12.876					17.384	11.854	10.332
															7.666		11.646					11.653	11.972	11.004					14.153	13.866	8.407
															13.208		12.62					7.474	7.928	13.206					9.932	11.664	7.003
															9.351		10.109					10.173	9.212	18.626					17.859	11.951	11.269
															13.208		9.918					9.5	10.976	13.96					11.772	15.069	8.992
															8.741		9.645					8.632	9.37	14.365					13.249	13.224	11.182
															11.446		11.288					9.279	10.002	14.405					11.404	9.09	15.26
															9		8.364					10.65	9.671	13.675					10.009	10.828	15.011
															8.129		13.651					14.334	12.304	13.764					14.153	14.57	12.078
															13.381		10.927					14.858	10.5	13.96					15.981	14.509	12.584
															8.049		11.635					13.797	9.882	14.052					12.991	14.33	14.024
															9.496		8.218					11.387	9.504	21.313					11.207	9.464	11.998
															12.534		9.461					10.095	8.687	14.33					10	15.536	8.91
															9.465		8.791					6.057	10.976	12.937					16.606	18.991	4.656
															13.224		11.583					13.385	8.357	16.185					10.22	10.628	6.882
															9.465		9.366					8.461	11.888	13.717					12.486	11.39	11.371
															12.699		8.634					7.924	8.824	14.225					12.119	11.973	12.498
															11.446		9.896					13.21	9.504	14.627					14.515	12.233	13.328
															10.173		14.11					8.614	9.684	13.053					12.961	12.5	12.19
															10.927		11.581					7.427	8.269	20.456					12.939	9.242	12.649
															11.038		11.611					13.807	8.751	16.604					11.056	10.667	10.151
															9.465		9.048					10.457	8.769	11.024					10.119	8.87	13.094
															10.299		10.278					7.107	9.822	22.555					14.828	13.224	8.22
															7.439		9.674					9.62	8.871	13.21					9.962	15.262	8.962
															11.559		7.53					15	10.643	12.881					9.071	10.299	10.405
															8.976		9.099					9.089	8.889	11.07					14.78	8.633	11.821
															12.074		10.249					12.92	10.012	9.984					12.377	9.465	12.794
															10.608		8.326					10.934	9.641	12.314					9.04	11.038	11.061
															11.792		7.89					11.266	9.527	10.295					13.629	10.721	11.07
															10.547		9.605					8.595	6.293	8.865					6.57	6.47	8.02
															14.029		10.449					9.741	11.887	10.273					11.858	7.143	12.208
															7.96		9.104					12.14	11.76	10.539					8.978	13.53	12.307
															11.496		7.504					9.709	9.908	11.107					9.577	14.863	13.776
															10.472		10.613					13.73	12.049	9.422					10.033	15.41	11.783
															9.829		10.613					11.107	8.362	12.032					7.952	11.753	12.218
															8.103		8.582					7.111	12.602	10.695					11.182	11.358	12.307
															8.741		8.268					12.868	11.688	12.314					13.946	18.975	10.611
															14.055		7.285					13.162	12.81	14.296					10.119	12.697	9.338
															10.299		7.371					7.592	13.93	11.997					11.242	9.77	10.375
															9.556		9.896					7.227	12.95	14.561					14.255	13.919	24.79
															12.233		9.71					7.721	10.444	7.9					13.946	16.507	12.325
															9		7.829					9.266	7.666	15.581					11.601	16.438	7.142
															12.05		10.174					10.84	10.519	7.63					8.484	17.949	13.232
															8.269		8.834					8.64	12.326	12.208					11.557	15.015	11.081
															9.243		9.122					10.855	12.653	10.101					14.314	17.368	18.024
															11.384		7.722					11.579	13.664	11.957					12.771	9.22	14.065
															12.586		10.732					8.962	13.601	10.802					10.05	17.221	15.259
															9.873		7.576					11.368	10.395	10.123					8.702	15.229	11.88
															12.654		11.579					11.968	6.815	11.244					8.24	15.475	16.687
															7.582		8.155					11.783	9.86	12.731					16.704	14.545	6.187
															10.334		7.04					10.186	11.037	9.176					11.535	13.961	13.282
															10.25		9.956					9.46	8.554	8.746					10.405	15.029	14.639
															9.985		9.592					9.378	9.065	10.469					13.901	13.142	12.208
															11.18		6.563					10.602	5.679	8.702					9.46	12.872	10.925
															12.643		6.931					12.681	8.338	12.881					10.602	8.642	13.714
															13.106		8.466					10.301	14.096	10.497					10.647	10.341	9.473
															7.337		6.434					12.197	7.631	13.435					10.107	13.208	8.154
															6.945		7.722					8.08	9.245	9.036					11.426	10.444	10.457
															9.821		8.364					11.255	11.827	10.611					9.842	15.116	9.663
															7.89		6.625					8.876	7.988	11.691					8.267	11.761	9.145
															6.669		7.126					12.573	9.344	11.864					8.789	11.212	9.855
															8.329		5.893					7.107	12.377	8.359					10.22	12.327	11.286
															9.451		9.172					9.659	9.512	14.994					10.173	16.969	7.174
															9.101		9.099					10.35	15.563	13.145					7.663	20.821	8.595
															10.857		9.187					5.512	14.843	9.029					10.781	11.588	10.009
															9.595		7.319					10.84	11.588	10.746					10.948	10.775	10.539
															9.101		9.211					11.936	9.701	12.265					12.979	10.229	8.146
															10.175		10.221					11.116	9.284	11.104					12.771	14.489	11.885
															11.358		7.743					10.71	11.014	11.764					8.278	14.39	13.249
															10.386		6.782					10.405	13.023	16.433					12.641	16.643	13.162
															8.863		6.82					11.266	9.579	12.307					11.368	13.222	15.795
															9.844		6.39					10.298	10.37	9.513					12.491	12.231	11.401
															6.315		6.791					9.148	13.445	8.702					10.602	9.651	9.577
															8.364		9.663					12.681	12.772	7.742					14.078	9.365	9.341
															12.181		5.886					10.405	12.496	7.84					12.231	8.837	10.707
															9.821		7.228					10.713	14.799	13.028					12.761	11.971	14.543
															9.15		8.279					8.216	9.414	9.279					13.174	12.377	8.749
															6		5.761					11.13	13.418	10.855					12.265	9.242	12.821
															10.386		7.795					10.047	11.734	12.881					10.707	10.221	10.457
															10.471		8.615					13.038	15.667	7.422					8.691	10.626	12.085
															11.389		6.865					14.436	10.843	10.433					12.335	14.841	12.53
															8.924		9.037					12.281	9.838	9.389					12.937	12.313	8.332
															9.96		7.901					12.893	12.941	9.871					13.834	13.292	15.608
															8.597		8.24					15.311	11.548	8.139					13.962	8.03	11.312
															10.147		7.677					11.885	9.745	12.179					12.14	7.665	12.417
															5.204		8.571					10.957	17.495	9.696					10.878	10.298	15.679
															9.343		7.35					13.249	11.175	11.493					11.669	10.47	12.932
															10.334		8.626					10.611	8.521	12.021					10.047	6.824	16.75
															12.53		10.711					12.231	10.56	16.687					10.71	5.728	11.244
															13.41		10.498					10.095	12.341	12.92					14.637	8.715	6.998
															11.859		10.449					9.894	12.409	7.138					12.621	8.54	12.307
															9.138		8.581					12.701	9.526	9.748					12.731	7.072	13.468
															9.795		9.187					8.836	9.771	6.562					11.107	7.514	8.713
															12.341		11.096					11.764	10.898	10.863					12.252	11.14	12.265
															10.832		9.211					9.593	10.266	14.017					9.338	14.563	9.145
															11.131		8.863					10.506	8.929	10.65					10.158	13.779	13.77
															9.243		8.333					9.593	10.455	10.384					12.621	15.227	13.356
															11.59		9.661					9.553	10.871	12.628					14.769	8.172	12.116
															11.208		9.592					12.466	9.662	5.558					11.15	12.03	9.643
															9.513		12.118					14.314	12.811	7.336					17.923	14.563	12.991
															12.192		13.162					14.812	13.051	12.376					8.48	14.225	11.764
															10.792		9.673					13.924	11.93	8.584					10.84	12.584	10.375
															8.338		9.894					10.545	10.751	8.127					13.125	11.024	8.89
															14.354		8.139					11.968	11.751	10.737					7.575	10.984	9.54
															6.189		9.176					9.117	10.862	11.3					9.738	11.185	11.176
															11.46		9.515					12.731	9.025	11.107					10.393	15.203	10.611
															9.58		8.761					9.593	8.364	8.24					12.921	12.19	9.368
															10.439		6.105					9.593	10.294	9.709					12.876	8.87	16.925
															10.357		10.97					15.883	10.187	15.011					11.735	11.741	10.136
															9.399		7.837					14.769	9.278	13.499					16.172	10.606	7.571
															7.114		8.838					13.028	13.666	12.307					15.649	11.388	10.173
															10.817		8.484					11.532	11.149	15.59					12.77	12.208	7.111
															9.106		8.515					13.527	12.401	11.21					15.854	11.857	11.815
															11.673		8.462					13.59	10.103	13.432					12.078	9.842	11.038
															9.55		9.048					10.31	5.502	12.659					12.697	13.271	10.248
															10.294		6.962					9.61	7.204	14.349					12.4	13.053	10.173
															10.238		10.298					16.622	10.26	11.666					12.22	9.85	11.061
															10.684		7.139					10	8.219	10.602					16.172	8.632	8.174
															7.771		8.481					7.084	15.51	10.123					14.415	10.978	5.628
															8.899		7.35					12.89	15.755	13.325					10.626	12.492	5.197
															9.401		8.816					8.717	12.039	7.92					14.415	10.298	7.658
															8.899		9.611					11.904	14.723	11.412					8.649	8.302	9.156
															8.173		6.233					9.593	11.663	9.12					9.936	12.325	9.765
															8.571		7.504					11.957	8.969	8.923					12.606	8.189	5.88
															11.95		9.661					10.614	10.55	8.595					14.913	10.978	5.235
															12.546		8.19					8.962	11.603	12.497					9.908	13.249	5.489
															9.138		9.71					9.085	9.22	13.089					10.35	11.363	5.889
															10.177		11.089					9.871	8.97	10.626					10.957	9.636	12.546
															11.111		14.95					9.855	12.584	12.881					12.927	10.443	11.025
															14.417		9.187					12.621	13.294	13.901					10.457	8.632	11.056
															8.978		9.009					12.021	9.35	11.3					12.497	8.507	11.201
															10.981		9.818					12.389	7.889	11.634					11.612	20.568	9.279
															7.926		12.181					17.279	15.406	8.584					13.21	17.675	10.273
															7.908		9.994					12.135	14.49	7.675					13.028	18.03	10.781
															7.631		11.302					13.07	13.252	10.359					9.378	14.052	9.894
															7.641		11.646					11.401	11.572	9.46					13.527	10.332	10.542
															7.594		10.312					12.252	12.176	11.644					10.35	11.887	8.332
															10.23		8.139					7.638	9.106	10.384					16.597	15.562	12.335
															9.065		11.635					11.85	11.365	10.566					12.861	10.518	10.173
															12.022		6.141					11.255	9.78	12.466					12.868	12.854	10.647
															7.373		10.158					8.76	7.631	9.871					18.17	11.513	10.211
															9.278		11.109					8.48	9.495	9.942					13.686	9.936	11.671
															10.097		10.571					10.273	9.669	13.63					12.045	10.497	10.767
															8.219		10.136					9.12	11.702	9.368					9.636	11.778	11.358
															9.873		9.281					9.593	7.027	8.702					9.817	10.193	10.223
															8.716		9.605					7.563	8.888	13.028					9.399	10.66	13.124
															11.5		11.444					10.375	7.989	9.117					11.767	12.498	10.209
															7.196		10.101					13.075	9.22	11.15					8.559	15.521	11.206
															7.971		11.817					15.33	7.208	9.593					12.231	11.293	10.06
															8.297		12.141					13.883	9.611	10.948					15.91	14.255	11.581
															9.102		9.83					15.311	9.99	15.72					14.585	12.601	14.294
															9.157		11.821					13.888	9.229	13.649					10.616	7.282	12.991
															9.322		8.83					10.767	14.727	12.761					13.406	11.004	10.647
															8.594		10.277					13.512	11.247	14.698					9.72	14.607	10.614
															9.507		8.14					13.68	11.298	14.949					9.837	13.053	12.649
															11.622		11.679					11.255	15.14	10.969					12.973	10.158	9.709
															9.399		12.181					13.298	13.552	11.412					10.175	9.156	15.33
															8.072		15.918					12.848	12.9	10.872					9.932	12.137	10.506
															7.422		12.773					16.9	16.702	9.172					9.61	10.84	10.396
															10.496		14.685					10.72	17.275	10.872					12.095	9.117	9.871
															10.076		9.611					12.691	10.229	12.366					9.368	15.608	8.328
															6.945		8.892					12.921	10.412	9.871					8.22	11.457	12.369
															10.119		12.772					9.85	12.831	8.847					9.513	8.726	10.384
															9.345		12.973					14.052	10.616	15.363					10.957	9.494	13.356
															10.097		9.104					13.512	12.361	11.107					11.356	9.496	11.387
															7.706		13.265					8.998	10.976	8.702					12.739	13.572	10.737
															10.739		10.888					13.675	14.09	12.127					11.13	12.095	12.821
															11.058		15.314					14.489	8.297	12.871					8.93	12.122	10.22
															9.22		10.049					12.22	11.561	12.794					10.542	10.177	11.356
															10.662		10.626					12.532	13.072	10.695					13.489	12.398	14.683
															7.725		9.611					12.584	14.591	10.855					9.117	14.734	15.495
															8.586		6.188					9.908	11.195	10.922					12.937	9.773	12.179
															7.393		10.187					13.929	12.403	13.133					13.658	9.212	10.65
															9.96		8.077					10.926	12.585	10.076					11.356	14.912	11.732
															7.615		8.582					10.919	10.432	9.942					15.278	10.294	8.016
															6.406		10.096					15.128	11.472	8.267					17.479	10.608	12.077
															8.611		9.281					12.486	8.364	12.307					14.294	9.065	10.469
															8.149		8.762					16.282	9.093	8.76					10.647	10.168	9.748
															7.283		8.924					11.133	8.475	8.922					11.368	8.338	10.626
															10.012		12.316					13.591	6.585	11.764					10.84	9.136	12.55
															10.662		9.75					13.141	10.898	14.153					11.783	10.764	13.378
															9.232		9.03					12.584	8.642	12.871					15.561	11.524	14.06
															8.948		8.924					12.072	11.175	13.277					10.469	7.424	10.899
															8.219		9.947					14.39	8.998	9.816					11.269	12.341	15.347
															7.619		10.001					9.211	12.074	15.904					10.158	8.98	11.435
															6.061		10.604					10.47	10.26	12.515					9.603	7.805	14.447
															6.201		7.677					8.311	9.35	10.375					8.64	13.366	9.365
															6.862		8.597					10.599	10.795	11.634					13.649	9.245	9.089
															7.798		9.611					13.378	8.348	18.424					14.743	11.435	11.885
															10.596		12.158					12.861	11.212	11.691					11.3	10.48	14.387
															11.94		10.352					18.62	7.796	9.673					12.731	7.953	10.31
															7.393		9.146					18.072	10.189	14.017					13.378	6.623	9.186
															8.247		9.188					8.483	10.563	13.356					11.968	11.792	7.266
															8.381		9.431					8.03	5.679	9.338					9.099	12.467	11.387
															8.636		9.353					15.028	9.467	14.341					11.864	7.878	7.795
															7.364		7.53					13.965	11.18	9.603					10.545	8.594	11.971
															8.978		9.555					12.325	9.031	12.304					15.534	8.504	9.8
															9.089		7.492					9.908	11.827	7.457					12.307	13.129	13.174
															6.857		10.676					11.612	11.006	10.569					14.994	10.419	12.53
															5.421		7.359					13.543	18.143	11.141					11.446	10.669	10.161
															5.986		8.481					15.608	8.838	13.649					12.417	12.419	10.173
															12.772		11.177					10.978	14.613	10.136					11.207	9.284	8.573
															13.282		7.796					12.04	16.401	12.458					12.369	8.036	15.849
															12.871		8.586					11.989	10.474	7.675					13.88	12.392	10.298
															10.896		10.541					19.551	11.415	13.96					15.303	7.641	15.809
															9.422		7.04					11.401	5.097	11.893					9.696	12.004	10.774
															11.403		7.861					16.643	12.105	13.807					12.376	14.027	13.543
															9.177		6.563					8.362	15.96	10.359					10.076	13.748	11.85
															11.536		7.829					13.751	12.822	10.095					9.846	10.547	16.282
															10.376		9.595					12.325	13.631	13.73					8.833	7.004	14.807
															10.376		9.611					12.085	13.737	9.099					12.127	13.055	11.588
															10.601		8.175					13.887	12.398	15.194					12.077	11.093	14.25
															11.693		8.218					13.88	10.615	13.555					12.179	6.428	13.888
															11.864		12.142					10.707	10.002	16.91					8.146	12.111	12.809
															11.18		7.454					9.593	11.663	11.579					8.951	10.119	12.893
															8.364		8.634					11.342	8.621	14.99					10.405	11.603	13.335
															8.571		8.268					12.868	12.608	11.176					9.368	12.107	8.465
															8.053		7.458					11.471	9.527	10.393					9.513	12.024	7.959
															11.287		10.9					13.992	9.997	12.659					13.222	8.061	9.494
															10.648		8.747					7.358	9.307	7.284					7.63	11.86	14.913
															9.611		11.152					9.46	10.979	10.731					8.127	11.183	13.335
															9.818		8.641					12.977	9.324	12.56					10.781	11.988	13.222
															11.21		9.257					10.295	12.849	12.871					11.404	13.463	11.236
															9.674		11.817					10.448	9.713	13.318					10.713	14.646	11.185
															8.585		6.553					16.254	13.818	14.189					9.186	10.315	7.182
															10.711		5.723					9.62	11.524	10.922					7.474	15.174	13.394
															8.924		11.537					13.028	9.772	11.612					10.173	13.028	12.43
															12.683		9.71					12.182	13.251	19.334					14.563	13.253	12.208
															8.945		9.09					10.22	6.89	12.182					7.795	14.32	7.336
															11.635		9.505					10.542	7.946	14.715					6.893	16.172	13.325
															13.443		10.9					13.435	10.791	14.607					10.948	8.808	10.674
															13.214		11.622					8.789	7.593	14.088					8.919	12.082	9.338
															10.433		8.022					15.74	9.925	18.06					9.429	8.871	14.144
															7.693		10.889					11.912	7.95	14.462					12.19	9.705	13.028
															11.004		10.376					8.962	9.713	14.898					11.556	13.024	8.962
															10.856		8.022					10.872	7.208	17.459					12.03	18.456	9.955
															9.946		10.278					8.923	9.669	9.984					11.759	9.675	13.44
															7.458		10.544					13.413	11.136	14.845					12.651	7.725	10.211
															10.152		9.611					11.426	14.186	8.016					12.537	13.948	13.325
															10.697		9.394					12.389	12.499	15.961					14.415	14.732	15.805
															12.139		7.825					11.018	8.042	13.378					16.949	14.84	15.184
															8.633		10.959					10.948	7.096	19.641					13.653	14.136	16.704
															8.761		9.101					13.277	11.693	10.405					13.221	11.322	11.634
															13.68		13.328					8.404	10.471	16.778					12.048	9.507	14.7
															9.83		10.222					9.593	7.095	14.44					12.492	10.177	13.816
															8.952		5.644					10.602	6.838	8.923					12.92	9.86	10.276
															7.572		9.985					11.741	8.441	9.897					12.072	11.739	9.46
															9.946		12.378					11.444	8.331	10.136					9.218	9.734	10.614
															9.895		8.762					10.395	8.054	9.593					13.721	10.616	12.991
															8.93		9.621					10.395	9.283	11.278					16.434	15.078	11.535
															9.856		6.606					11.037	12.275	10					12.606	17.085	12.376
															7.743		7.926					11.513	8.45	9.12					11.388	9.37	10.047
															8.425		7.576					12.19	9.721	9.593					12.948	13.866	12.179
															9.488		9.896					10.186	10.047	10					13.633	10.883	8.332
															10.159		6.796					13.037	10.06	8.614					12.583	11.94	8.815
															14.447		9.938					10.172	8.207	10.173					8.267	12.586	10.276
															12.992		14.026					10.019	6.126	10.22					12.417	11.347	9.259
															8.19		9.048					11.201	5.79	9.816					13.053	11.15	8.267
															12.821		10.407					8.614	10.262	9.894					14.768	12.617	9.553
															11.999		10.616					8.573	9.165	11.356					14.249	17.61	10.925
															9.431		10.783					11.176	14.511	8.569					11.97	15.934	11.62
															9.894		9.74					8.951	9.652	9.503					12.33	11.171	12.376
															14.42		11.852					9.659	9.578	10.602					13.14	15.014	11.359
															16.558		14.648					9.31	10.709	8.833					9.364	9.653	11.207
															13.662		11.959					10.076	11.294	12.265					10.22	13.249	8.483
															14.12		9.674					9.643	11.514	6.146					12.03	16.698	8.717
															10.173		10.9					12.231	16.455	7.012					13.649	15.314	10.405
															10.359		8.018					10.855	10.395	12.064					12.377	14.491	11.625
															12.368		16.243					8.146	15.449	13.882					14.622	11.446	6.605
															10.398		10.398					11.971	11.294	10.35					8.336	11.514	12.032
															6.82		9.288					8.048	5.679	8.324					11.97	10.498	11.426
															10.64		8.39					11.62	12.538	8.64					10.193	12.327	9.473
															10.208		7.902					18.381	11.363	11.764					12.137	13.222	8.465
															7.693		11.072					11.764	11.004	11.936					11.832	14.332	13.318
															10.347		7.902					9.259	7.437	7.774					5.691	12.894	9.089
															10.604		7.902					14.405	7.073	10.497					9.28	12.894	7.388
															10.958		9.925					16.604	15.197	9.712					11.255	12.401	14.812
															11.257		13.903					12.659	12.919	11.359					11.055	9.243	11.15
															9.03		10.628					6.72	8.166	8.58					9.085	12.887	10.995
															10.049		7					14.456	12.187	9.422					12.33	9.937	8.717
															10.639		7.706					9.338	12.585	8.595					7.795	13.055	10.922
															8.718		7.32					8.423	17.913	10.31					6.116	10.34	12.53
															10.498		8.791					8.789	9.024	8.746					19.306	12.949	10.298
															9.818		7.61					11.557	11.514	9.696					10.47	14.23	10.626
															7.475		10.376					8.595	13.249	12.91					11.388	14.055	10.098
															6.833		7.564					11.928	12.517	9.923					13.628	14.012	11.061
															10.737		9.038					8.139	12.449	11.707					10.001	15.26	7.663
															8.541		9.501					11.15	12.704	10.359					10.925	13.293	13.089
															10.457		7.424					10	8.837	8.48					13.27	12.049	11.625
															9.855		8.148					10	12.13	9.523					11.444	13.961	11.634
															12.306		8.093					8.434	12.442	11.038					16.14	12.22	12.641
															15.449		6.567					8.4	10.175	7.675					12.771	10.284	12.14
															12.21		8.081					9.307	13.295	10.405					10.854	12.719	11.443
															14.641		8.022					10.123	10.186	10.957					11.85	11.388	8.139
															8.574		10.222					10.957	10.828	8.048					13.468	8.998	9.855
															13.416		11.959					9.5	13.077	6.706					10.713	14.007	11.493
															9.048		10.532					11.634	11.038	9.984					12.324	16.802	9.942
															11.065		7.982					9.61	12.032	9.186					12.671	9.35	11.821
															12.56		8.541					9.945	9.385	12.417					13.125	14.565	10.276
															8.891		8.425					8.267	9.989	8.713					12.971	10.323	8.76
															13.399		11.089					7.142	12.75	10.925					13.069	9.365	9.429
															13.925		7.219					12.621	16.022	5.983					13.741	12.169	9.855
															11.991		8.303					7.336	14.933	7.563					12.671	13.248	11.426
															9.174		8.626					11.992	9.017	9.186					14.786	10.694	10.208
															10.376		11.495					8.702	7.907	8.08					10.497	15.536	8.139
															8.816		10.88					9.829	7.631	6.72					8.64	12.121	8.465
															11.887		8.791					9.842	6.292	7.349					10.545	13.765	8.24
															11.246		8.333					9.378	10.495	10.899					11.155	12.21	12.532
															10.174		9.645					8.343	9.527	10.08					14.853	11.955	12.868
															9.037		7.593					9.663	11.437	10.934					12.618	11.363	8.684
															11.444		8.816					9.036	10.363	13.413					12.181	8.871	11.612
															11.208		10.147					7.592	10.494	9.894					13.961	9.653	9.553
															10.405		10.376					9.709	11.539	9.741					10.101	12.727	7.503
															10.01		15.92					8.076	7.256	12.064					12.613	6.07	9.61
															11.107		9.15					8.569	13.245	7.888					12.909	13.142	10.781
															11.444		14.035					7.571	13.919	12.681					12.868	9.908	12.374
															14.155		9.873					8.865	13.524	10.518					11.815	10.159	12.376
															10.611		10.162					10.298	9.496	13.604					10.871	9.118	13.435
															9.821		11.581					9.378	18.689	12.218					10.497	10.769	11.928
															14.108		11.744					11.904	15.011	10.626					9.144	15.96	14.126
															9.101		10.001					11.677	7.874	8.923					10.712	15.002	15.74
															9.955		8.485					12.532	10.48	11.957					9.636	15.902	9.54
															11.827		13.091					11.334	12.326	10.276					8.789	12.584	9.945
															11.832		9.488					10.731	11.971	10.405					8.251	14.257	11.778
															10.444		10.299					9.894	10.25	11.783					11.299	13.385	8.24
															9.311		11.863					13.527	12.209	8.362					13.346	11.761	7.358
															12.601		15.249					10.707	11.388	10.384					9.751	13.324	12.458
															9.495		12.371					9.748	13.781	9.748					9.31	12.943	12.618
															8.65		11.403					9.378	10.687	12.731					7.888	16.351	11.653
															6.623		11.823					10.151	10.526	10.047					7.86	9.118	12.304
															5.761		7.853					11.741	10.767	10.969					10.863	12.5	10.161
															8.466		9.188					10.339	13.899	10.248					11.652	12.418	10.957
															6.425		11.97					10.443	12.418	11.435					11.799	11.135	11.579
															14.565		10.532					9.593	11.539	10.145					9.799	9.652	12.242
															11.246		11.495					12.876	10.299	9.855					11.4	15.905	12.573
															12.283		10.739					10.84	8.782	11.743					14.386	12.402	9.523
															10.051		11.895					12.4	12.073	10.647					9.337	10.229	8.389
															10		11.02					16.069	7.959	10.518					9.993	9.696	10.611
															7.228		13.072					14.21	10.299	11.512					10.157	13.316	16.287
															8.815		11.635					12.025	13.931	9.741					8.048	11.834	9.751
															10.352		10.087					11.513	8.808	8.216					7.675	11.212	11.677
															12.772		9.366					11.457	8.928	9.855					12.641	12.727	15.427
															11.602		8.931					11.532	10.303	13.59					9.819	10.601	9.751
															10.174		7.424					10.899	10.709	10.878					8.745	16.384	11.633
															7.337		14.467					11.85	9.512	15.679					11.989	12.098	12.135
															11.245		11.152					11.293	14.136	10.211					8.614	16.763	9.266
															9.739		10.299					11.532	11.256	7.609					12.879	9.844	11.13
															6.819		15.147					9.651	10.85	14.949					10.157	9.829	17.818
															9.505		10.499					12.4	8.348	12.19					8.139	7.272	10.095
															10.249		15.281					9.311	7.312	13.411					8.266	11.358	18.233
															10.896		9.525					15.813	9.909	9.696					9.738	12.079	12.977
															12.711		11.428					12.096	8.969	11.244					10.687	14.084	11.885
															9.895		8.863					13.717	9.466	12.53					12.948	12.494	10.53
															8.632		10.652					12.809	12.198	11.634					12.452	15.919	8.595
															9.83		9.621					12.377	8.899	13.263					12.486	9.741	12.641
															8.863		13.463					11.344	8.899	10.802					10.249	8.314	13.318
															12.136		7.593					9.842	11.212	8.614					11.236	10.396	8.789
															13.233		8.715					14.083	9.488	10.878					8.189	8.364	11.107
															8.175		10.109					13.009	11.084	12.208					11.893	11.142	9.643
															8.252		17.387					11.255	10.518	13.889					14.563	7.61	15.442
															10.407		10.959					10.84	12.139	12.731					11.3	11.882	14.126
															11.004		9.802					11.832	8.839	14.743					11.13	9.96	9.31
															10.695		11.581					12.031	12.073	9.186					9.659	15.229	12.325
															10.051		10.296					9.994	10.761	11.443					11.087	11.827	18.072
															9.484		10.103					10.72	13.185	13.797					19.195	16.906	11.512
															10.357		10.792					10.978	14.765	12.032					11.928	15.154	12.21
															10.433		13.809					10.847	14.227	12.428					12.415	12.628	10.53
															7.529		10.471					12.691	14.391	12.252					13.116	9.101	16.778
															9.541		8.218					11.413	12.95	12.53					12.621	10.761	10.057
															8.081		10.407					9.494	11.459	13.834					12.977	9.873	8.962
															7.358		10.147					13.722	8.094	9.593					12.208	13.53	11.634
															8.633		12.781					17.856	9.873	9.389					12.641	11.973	9.61
															7.688		8.78					12.532	10.444	13.686					10.375	16.918	12.893
															9.029		12.188					13.378		11.493					10.405	8.633	12.307
															8.405		9.136					15.076		9.932					10.384	10.137	13.527
															11.065		8.899					14.494	9.85	15.493					10	13.294	10.009
															7.828		8.685					11.21	13.68	7.92					11.864	9.102	8.951
															8.466		8.808					12.137	20.386	11.778					14.078	6.116	10.614
															9.085		6.475					12.331	11.445	12.14					8.833	12.192	11.412
															9.515		11.485					15.218	8.507	9.748					11.426	9.873	19.943
															8.324		11.755					17.45	11.612	10.226					12.242	12.285	9.085
															7.792		11.708					13.649	12.12	12.821					12.032	16.256	10.707
															6.773		9.617					13.244	12.848	12.291					12.628	11.885	10.602
															7.969		13.028					9.471	10.66	8.691					10.737	8.911	11.557
															11.906		9.873					11.588	10.919	9.5					8.569	11.345	10.298
															10.864		10.205					9.532	14.464	9.141					8.922	11.135	10.375
															12.771		12.21					16.069	11.662	10.611					12.307	12.699	12.114
															10.567		10.245					8.91	9.403	12.613					10.35	17.479	11.038
															9.257		13.887					13.96	11.557	10.347					11.893	12.922	12.649
															8.674		12.047					8.829	8.862	9.659					8.032	14.415	11.936
															7.825		8.521					11.662	11.037	12.458					5.892	14.047	9.603
															10.856		16.487					11.004	11.857	8.847					8.717	11.237	15.697
															9.099		12.48					11.133	11.851	9.932					9.846	9.994	8.573
															11.211		13.209					11.082	11.371	8.595					12.871	9.487	11.426
															10.077		11.358					10.667	11.588	11.412					8.389	9.282	10.359
															8.952		8.129					9.349	13.96	10.76					8.862	12.877	10.405
															10.174		8.502					11.735	10.332	8.951					7.86	15.922	11.363
															8.268		9					7.35	7.959	9.12					10.457	10.761	12.948
															8.127		10.287					12.948	11.532	9.036					11.666	12.601	12.03
															8.065		9.773					7.665	11.971	9.279					12.451	16.455	8.922
															6.11		7.764					13.026	8.092	11.244					10.085	12.895	11.85
															6.582		7.073					11.255	9.372	12.659					13.089	11.496	14.909
															8.862		8.808					10.058	10.172	11.764					12.532	14.808	8.048
															9.595		7.687					9.372	8.715	9.855					12.389	15.375	10.298
															9.145		7.764					8.507	6.446	13.742					15.643	8.172	15.708
															9.484		7.657					10.606	11.457	17.207					7.774	12.209	13.543
															9.748		9.882					13.053	7.795	12.135					9.21	8.716	17.111
															9.488		9.846					12.377	10.023	9.894					10.731	9.652	11.885
															7.453		8.621					11.056	7.571	11.342					14.065	10.249	12.281
															7.825		10.583					13.026	9.871	10.957					15.142		11.141
															8.615		8.16					11.293	12.031	10.161					14.812		11.024
															9.899		8.407					13.119	12.025	12.674					6.888	12.662	13.859
															8.127		9.714					11.134	8.566	20.989					12.573	11.623	15.247
															8.952		12.122					15.316	8.715	11.493					15.526	10.111	15.649
															10.222		11.324					10.76	11.255	12.932					12.621	11.384	11.559
															11.361		11.761					12.893	10.714	13.59					11.864	14.237	14.072
															9.103		7.631					8.74	10.221	9.266					12.621	14.547	15.119
															9.029		10.04					9.732	11.513	9.099					12.56	12.044	13.385
															8.209		10.062					13.628	9.994	9.047					10	12.876	15.363
															7.53		7.89					8.048	12.19	12.314					13.527	12.073	12.417
															8.217		12.379					8.405	11.037	20.191					12.573	12.801	16.187
															6.068		8.611					11.14	8.311	10.545					12.14	13.285	11.968
															10.058		8.685					9.908	13.037	18.284					16.417	12.499	15.697
															7.389		7.045					11.887	14.39	15.26					12.512	10.167	10.384
															7.664		7.926					11.513	14.136	20.063					19.13	11.811	11.707
															10.077		7.631					12.078	13.251	12.137					10.863	8.808	10.375
															9.533		10.909					15.686	8.934	16.069					14.099	12.454	12.671
															14.615		6.201					13.712	12.725	17.536					11.51	11.919	14.787
															14.257		7.068					12.167	10.453	17.536					13.665	11.623	10.276
															13.143		8.561					10.228	13.629	13.888					12.771	12.361	10.79
															12.402		7.874					14.189	10.84	15.185					11.772	9.228	11.957
															11.515		9.313					9.936	13.104	14.134					9.945	7.208	11.244
															8.912		9.2					15.33	15.097	12.937					12.417	9.844	11.471
															10.06		9.106					9.218	13.127	12.871					9.738	13.062	12.208
															12.263		7.603					11.14	16.917	15.26					12.868	9.611	16.835
															10.776		6.27					10.498	15.59	7.571					12.469	15.539	11.312
															16.953		8.202					13.649	16.383	12.22					9.942	9.597	16.159
															6.826		8.383					10.72	16.435	10.332					14.561	11.94	9.46
															13.055		9.882					10.339	12.77	9.828					14.957	8.998	12.537
															11.244		8.873					11.388	16.63	12.532					14.622	14.16	9.186
															10.187		9.52					12.725	12.36	13.889					14.347	8.824	14.026
															12.534		8.383					13.675	10.919	9.897					10.919	9.938	13.363
															9.771		8.195					10.545	13.591	11.732					14.808	11.194	18.421
															11.761		7.285					10.919	10.545	11.404					12.762	8.727	16.922
															11.135		9.065					12.12	10.332	9.176					14.585	8.726	9.305
															10.299		8.364					10.47	11.662	10.647					14.972	10.417	11.968
															10.901		7.216					11.004	15.33	13.825					16.353	8.148	12.873
															13.782		8.381					14.744	13.168	11.669					11.601	9.311	10.957
															12.139		7.256					13.919	12.538	10.22					14.729	13.427	10.173
															12.856		9.138					8.998	9.372	14.864					10.339	8.538	10.019
															13.273		6.293					13.009	8.128	18.137					15.332	7.095	10.713
															13.766		5.929					13.075	16.535	15.026					9.156	10.412	10.781
															11.135		12.751					12.22	14.494	9.855					16.52	11.806	9.389
															10.334		9.34					9.769	13.759	7.663					14.11	12.515	10.136
															8.312		11.252					14.27	13.443	10.298					13.919	10.06	9.855
															9.087		8.816					10.66	17.61	15.058					8.03	9.117	14.108
															10.848		10.377					12.697	18.312	9.709					14.634	10.606	7.981
															13.714		9.175					11.686	11.344	11.893					11.435	12.635	10.457
															9.697		9.963					9.937	14.884	10.375					12.038	10.514	10.095
															11.006		8.402					11.293	9.22	12.53					8.165	13.865	13.232
															9.366		9.465					14.088	10.913	13.68					14.027	9.135	12.771
															8.032		7.962					11.588	9.515	11.864					12.307	9.757	10.71
															11.39		6.909					11.363	12.417	11.15					15.351	9.651	9.368
															12.05		9.159					12.854	14.162	8.461					12.231	8.561	10.211
															11.058		9.183					8.649	15.548	11.061					15.119	11.919	10.647
															9.22		6.436					11.741	11.804	9.279					13.454	9.656	12.43
															9.873		12.864					11.538	13.169	10.393					17.508	8.834	14.108
															10.561		11.709					11.357	11.506	10.781					11.342	11.171	12.182
															9.996		9.102					12.208	13.829	12.56					12.428	9.662	11.989
															8.741		10.083					16.605	10.014	10.35					12.621	12.106	8.702
															11.883		8.911					12.36	11.953	8.847					13.028	11.195	11.13
															8.508		5.941					13.07	13.137	10.295					12.208	10.591	11.691
															11.614		9.191					13.075	11.482	8.76					12.242	13.912	11.173
															10.194		7.489					13.68	12.553	12.769					11.989	7.687	10.614
															11.295		9.873					13.512	15.461	10.347					12.741	18.878	10.497
															13.186		6.786					10.498	15.425	10.248					11.633	14.78	8.702
															11.346		10.942					11.344	11.506	11.691					10.424	9.507	12.55
															11.889		9.675					12.691	15.584	11.426					12.497	7.467	10.497
															11.006		7.96					11.881	8.94	9.663					8.691	19.442	10.22
															11.955		11.36					14.088	14.629	11.156					13.499	13.974	7.904
															9.165		9.399					12.606	17.741	10.569					9.984	14.365	11.85
															12.05		10.419					13.759	13.829	6.865					11.15	11.077	7.981
															11.559		7.762					13.512	14.778	9.993					16.82	19.216	11.255
															10.829		8.716					11.004	14.745	10.085					14.464	14.07	7.609
															10.499		7.989					8.829	11.663	9.62					10.542	17.184	8.127
															8.716		9.496					10.339	8.155	11.244					9.186	12.36	8.804
															12.362		15.141					10.498	9.652	9.894					9.593	8.381	12.428
															12.693		9.431					12.208	7.804	8.209					9.307	13.313	7.231
															13.224		6.013					9.211	8.406	13.123					13.527	9.824	11.061
															10.251		8.219					8.465	11.663	8.389					11.51	10.414	9.738
															13.224		6.981					11.236	8.021	8.804					12.327	11.682	10.713
															11.295		10.341					9.703	8.583	6.98					12.671	9.58	10.101
															10.927		8.65					8.837	9.351	7.422					11.104	8.685	12.067
															10.003		8.477					13.168	11.539	10.085					11.691	7.129	10
															8.466		9.253					12.19	10.298	10.019					12.335	9.282	10.65
															9.374		15.611					12.325	9.117	7.071					11.387	9.369	13.089
															10.662		5.46					11.185	12.499	10.123					10.863	17.282	10.347
															9.822		10.99					13.779	7.768	8.209					17.168	15.002	7.084
															8.839		9.322					11.753	8.19	10.593					13.089	12.528	13.028
															7.666		9.78					10.76	11.257	9.018					15.197	10.84	10.737
															11.244		10.608					11.382	10.518	8.919					10.226	9.481	11.342
															12.122		8.873					10.228	12.261	10.145					13.125	11.919	9.894
															11.365		8.46					16.256	11.293	8.139					9.389	15.83	10.375
															10.003		17.109					12.948	8.19	7.336					13.937	13.364	9.31
															11.694		14.354					12.584	11.388	11.244					14.508	11.077	8.944
															13.381		8.228					13.628	11.76	6.865					15.665	12.985	9.871
															12.402		8.061					9.577	9.311	9.061					10.375	12.683	10.35
															12.263		11.038					11.741	10.687	8.862					18.424	14.167	10.737
															12.5		10.194					11.532	10.721	5.558					9.709	10.363	8.389
															12.923		9.55					10.606	9.118	7.266					11.815	8.405	9.8
															14.09		9.55					14.509	13.07	11.653					11.334	10.033	7.491
															10.194		6.201					9.242	15.372	6.329					13.325	9.404	10.226
															9.031		9.949					12.492	17.298	9.422					11.3	7.536	12.53
															9.938		6.439					7.112	15.539	9.643					12.871	15.711	8.584
															9.556		10.119					12.208	13.651	8.865					12.53	16.856	11.401
															10.722		9.664					10.66	10.545	10.173					6.962	12.379	7.774
															11.515		11.744					16.26	14.255	10.22					12.739	13.427	12.681
															9.102		11.994					10.47	12.379	7.92					12.691	12.121	10.047
															8.839		9.934					14.415	9.165	7.924					11.968	14.785	8.389
															8.634		8.963					11.741	14.27	11.904					11.51	15.077	10.674
															15.542		9.461					9.673	12.377	9.338					15.363	10.628	10.173
															11.59		9.555					15.218	12.938	7.725					11.732	12.861	10.542
															11.446		9.753					14.768	11.662	10.674					13.184	13.215	10.737
															14.136		10.058					12.492	8.838	9.422					15.643	12.894	12.389
															11.852		12.129					11.513	13.054	9.709					11.633	12.922	9.047
															10.709		12.935					10.559	6.104	8.713					11.653	15.978	8.02
															11.038		10.839					12.313	10.662	8.944					14.702	9.851	7.336
															10.024		9.308					12.031	11.037	8.804					14.672	6.857	9.036
															9.031		15.486					9.82	9.164	6.562					10.539	9.872	10.158
															6.436		10.747					13.336	11.445	8.389					10.356	15.087	12.322
															7.273		12.378					13.336	14.609	9.712					11.342	11.39	11.107
															10.341		9.312					7.232	10.444	6.682					11.244	9.175	8.829
															10.547		12.534					11.735	11.662	9.82					14.559	10.721	11.829
															11.135		11.089					12.325	13.443	8.22					10.925	10.721	9.8
															10.986		10.649					13.244	12.293	11.732					9.984	18.202	7.884
															8.364		9.257					8.837	13.546	6.72					9.984	10.559	9.141
															11.038		9.873					12.114	17.577	10.599					9.338	13.428	14.387
															8.466		5.756					9.871	7.898	11.244					12.91	12.602	14.639
															9.351		12.324					10.525	7.165	10.009					13.66	10.024	9.8
															9.844		11.358					7.437	13.492	12.064					12.739	14.407	10.248
															12.033		9.802					10.72	7.874	10.611					13.992	11.882	11.691
															12.517		11.97					7.514	10.608	7.704					8.64	11.514	9.176
															10.769		12.244					6.3	9.646	11.885					11.269	11.791	12.428
															11.025		7.428					11.293	11.206	12.21					11.479	12.268	16.271
															7.987		8.466					7.514	16.24	9.984					7.92	14.252	10.713
															12.703		8.597					11.881	8.476	10.098					11.581	10.545	9.816
															7.324		7.337					11.382	14.27	9.365					11.707	10.841	11.861
															9.844		7.04					12.948	8.551	9.089					8.876	11.388	12.231
															11.177		7.018					10.707	13.065	10.925					13.712	7.438	14.943
															9.611		8.834					13.282	10.223	13.411					12.701	14.146	13.649
															9.555		8.402					7.422	16.999	9.061					11.764	12.361	11.653
															10.924		9.15					11.421	14.052	9.307					13.116	9.871	9.709
															10.228		10.275					10.957	10.265	9.741					15.007	12.585	9.099
															12.376		5.644					12.322	12.137	11.096					9.61	12.534	12.032
															9.857		5.644					9.099	10.608	9.643					12.95	10.914	11.62
															12.244		10.109					7.904	13.899	6.552					10.542	10.769	10.186
															12.137		7.885					9.5	14.251	8.146					12.959	11.179	13.567
															10.604		9.188					10.211	16.951	9.59					9.266	9.117	10.995
															12.471		9.118					7.791	10.306	10.35					8.513	10.92	11.904
															6.208		11.866					9.663	12.408	6.79					9.984	14.915	13.742
															5.604		13.667					9.368	11.185	7.227					11.334	12.098	11.255
															8.436		9.257					11.07	14.308	15.353					10.84	9.873	13.411
															10.001		8.049					11.107	12.505	10.899					13.786	14.768	11.13
															8.268		6.664					12.731	12.872	8.389					12.741	12.032	6.667
															9.343		6.435					11.743	16.222	9.816					8.389	8.542	8.216
															8.14		8.326					10.375	10.582	9.141					11.601	10.223	9.486
															10.425		8.634					12.064	15.83	17.146					8.146	11.025	11.061
															9.505		8.081					11.003	14.446	9.846					15.345	6.981	6.706
															11.445		8.953					14.403	13.083	8.127					13.087	14.495	9.673
															10.783		6.669					8.111	12.314	9.12					9.103	12.419	10.047
															9.621		8.253					10.611	16.088	17.472					15.125	12.726	14.365
															10.616		11.143					13.116	6.461	6.547					11.512	15.143	11.634
															8.953		9.101					8.815	10.355	8.154					14.7	13.386	12.89
															9.308		8.128					10.887	14.485	10.674					11.928	10.334	12.861
															8.268		8.156					9.523	8.649	11.826					13.567	16.492	13.66
															10.398		9.899					12.327	11.769	10					13.318	14.875	11.557
															8.715		11.581					7.422	15.204	8.032					12.55	13.273	14.296
															9.143		8.053					11.864	10.989	13.461					10.497	12.026	10.497
															7.926		12.184					13.277	14.965	10.887					8.944	17.368	16.871
															7.031		10.25					9.659	13.993	8.267					9.338	14.768	10.899
															6.606		7.677					8.573	7.404	10.611					8.08	14.134	13.742
															13.265		9.896					7.231	9.844	8.127					12.182	9.701	14.7
															9.743		9.188					9.712	11.858	10					21.242	12.534	12.532
															11.512		9.26					8.584	14.842	11.601					10.922	15.651	11.471
															13.03		7.576					12.771	13.336	10.731					13.282	7.143	12.376
															10.049		9.645					8.465	13.764	8.829					15.811	9.844	10.384
															7.776		10.386					5.279	14.887	13.86					9.483	13.026	10.497
															9.75		8.597					15.849	18.209	10.396					7.692	11.456	11.359
															8.022		9.645					8.576	9.873	11.359					8.209	9.909	7.427
															11.423		9.75					9.67	11.852	11.087					13.397	10.775	9.242
															10.547		8.241					10.606	17.895	10.899						8.871	8.833
															9.501		10.783					15.26	17.999	11.426						9.675	13.335
															11.089		7.593					12.208	13.125	11.634					13.222	11.851	9.738
															9.638		6.548					11.912	16.285	11.864					14.898	16.309	9.255
															9.15		11.792					9.66	12.586	11.653					12.064	16.646	11.116
															7.031		15.281					6.625	9.138	10.457					9.842	12.602	7.63
															8.053		13.968					11.207	10.591	9.389					13.59	9.96	14.581
															12.468		13.224					12.498	10.076	12.469					9.392	12.121	11.559
															10.459		12.033					13.168	11.459	14.222					10.948	12.772	14.296
															7.424		11.792					9.28	10.657	10.707					14.947	13.818	12.156
															7.424		12.286					9.464	15.291	21.212					9.955	14.784	13.924
															10.275		11.515					14.25	10.843	10.301					15.194	12.895	13.555
															6.105		11.006					11.21	14.479	12.893					13.527	11.005	11.62
															6.815		10.921					14.884	15.61	11.286					12.252	13.038	8.951
															10.544		13.714					10.767	15.506	11.096					14.769	11.663	7.575
															7.982		13.3					11.133	17.491	10.433					10.957	16.453	11.21
															9.71		11.038					14.783	18.768	14.314					13.555	15.562	12.641
															9.515		13.63					13.141	17.67	10.405					14.99	12.488	10.638
															10.187		12.856					14.509	9.842	7.9					12.701	11.183	9.286
															8.191		12.033					11.513	8.551	8.423					12.135	13.109	16.81
															8.218		11.415					15.562	10.147	13.66					12.497	14.373	14.153
															9.595		13.143					10.221	5.878	10.05					13.937	14.308	13.145
															9.312		10.334					8.715	11.175	9.945					9.846	15.143	14.672
															8.128		9.909					7.437	7.614	13.038					14.285	16.204	14.024
															7.35		10.472					11.004	8.349	10.614					10.248	9.323	12.428
															11.097		7.351					13.314	9.701	10.208					11.342	11.754	10.925
															8.39		12.033					11.382	11.014	11.579					12.053	11.025	8.702
															8.805		11.973					13.298	12.111	12.428					12.064	13.923	9.31
															10.096		15.611					10.186	9.507	12.659					8.48	11.194	12.322
															6.963		13.865					17.102	14.26	7.827					16.312	8.551	16.051
															8.805		14.09					10.707	11.028	9.741					10.35	14.612	14.909
															9.475		13.719					8.507	11.683	12.428					9.141	6.538	12.741
															6.866		10.187					8.465	12.797	10.84					12.053	13.573	9.829
															14.432		11.59					14.189	13.462	11.51					8.923	11.938	10.84
															12.327		13.429					10.827	14.596	10.602					8.614	9.937	12.085
															11.688		13.143					12.114	13.074	9.473					8.389	7.216	9.392
															13.143		10.608					10.926	11.39	17.281					10.173	10.124	9.338
															11.515		10.472					10.545	16.789	11.255					10.35	10.37	10.107
															9.938		12.603					12.072	16.284	8.573					12.307	10.764	13.205
															11.955		13.186					10.559	15.029	10.506					10.136	11.435	9.483
															13.039		13.429					9.471	10.842	11.644					11.255	10.076	12.881
															9.374		11.384					9.85	12.419	8.847					11.337	8.476	9.916
															10.187		13.397					11.881	10.595	11.457					14.017	12.762	11.176
															14.624		13.782					12.208	9.948	9.186					11.176	13.083	9.473
															17.649		15.92					10.66	10.922	8.111					8.355	7.844	10.506
															11.828		13.782					10.193	14.467	8.923					10.095	7.373	12.4
															8.716		11.866					10.339	13.682	10.855					7.266	12.454	10.097
															6.826		8.435					14.083	13.251	11.783					10.248	12.511	11.69
															11.358		11.887					16.383	9.668	10.001					11.904	10.377	10.625
															9.734		14.778					13.222	17.649	13.816					10.781	10.986	9.029
															10.159		10.22					14.39	17.913	12.452					10.713	9.311	9.172
															14.367		8.022					13.48	11.39	14.21					10.248	6.961	7.774
															11.859		9.09					11.037	10.147	13.96					11.337	10.343	9.829
															10.709		9.101					11.004	13.471	9.871					14.06	10.657	14.587
															8.407		12.539					13.394	12.039	12.921					11.401	7.708	10.094
															11.743		12.934					10.058	14.976	12.635					14.209	8.85	10.172
															9.578		12.129					11.532	13.922	8.566					13.937	13.129	8.389
															8.304		9.474					13.764	15.783	9.148					13.028	10.04	5.913
															6.95		9.541					13.07	17.662	16.141					12.116	11.269	9.499
															7.796		8.332					8.268	15.958	12.959					12.095	15.851	8.778
															9.473		11.245					12.725	12.536	11.21					11.207	9.481	8.355
															9.465		8.326					11.662	15.333	15.414					11.559	11.484	11.968
															9.533		7.776					11.037	17.859	10.298					12.14	12.515	10.496
															12.895		8.39					10.193	16.919	12.77					10.899	12.187	7.794
															11.415		8.36					9.156	11.006	9.577					13.249	12.499	7.741
															8.584		7.906					14.189	9.087	7.904					11.829	10.048	7.182
															10.829		8.466					10.545	10.103	9.554					9.148	12.717	9.255
															7.458		7.388					12.031	12.098	9.554					7.86	11.09	11.556
															6.698		9.873					11.851	15.748	8.03					12.327	8.38	9.483
															9.578		8.951					11.382	10.662	9.85					12.469	9.843	8.139
															9		9.46					9.117	14.232	6.266					12.537	11.014	7.888
															10.776		8.19					6.057	13.126	13.384					11.457	12.303	12.85
															10.52		8.761					4.921	7.951	11.185					7.981	12.95	11.556
															10.662		10.096					8.405	8.831	12.284					7.774	11.827	10.359
															8.584		9.918					8.302	8.049	11.357					9.696	10.5	11.255
															10.715		8.425					11.388	14.332	11.004					14.287	10.836	6.667
															10.341		7.107					13.779	13.683	13.779					10.611	10.238	8.324
															10.396		7.35					10.545	16.659	16.592					11.799	10.792	9.999
															15.597		10					11.735	12.327	11.133					14.447	9.314	8.829
															9.909		9.099					13.026	12.811	8.048					11.816	11.953	12.118
															10.417		8.333					13.543	9	10.284					9.945	9.611	8.22
															12.286		9.287					12.025	15.244	9.403					12.314	11.634	8.944
															11.496		10.738					10.84	10.601	12.325					11.772	8.899	5.147
															12.05		9.484					8.38	14.94	10.22					7.491	10.863	8.4
															11.859		8.466					9.117	14.785	13.442					10.863	13.705	13.834
															8.542		7.589					13.271	12.263	14.769					11.912	10.033	9.428
															6.95		7.475					10.298	10.173	10.611					8.389	11.024	8.836
															7.572		6.707					14.932	11.834	13.414					9.984	10.298	8.683
															11.295		8.333					14.174	12.586	13.038					12.959	4.968	11.633
															11.688		8.303					13.028	14.843	11.691					10	9.661	9.593
															11.883		7.227					10.301	9.095	13.555					15.961	9.089	11.178
															14.392		8.39					12.861	15.974	12.252					11.557	9.77	13.086
															18.567		9.712					12.53	15.149	9.422					12.868	14.431	11.903
															11.688		8.268					12.304	13.888	8.632					11.521	10.98	12.738
															12.122		9.674					9.259	11.792	16.169					9.54	9.937	15.442
															13.482		10.187					12.674	13.257	12.376					10.887	7.843	10.921
															14.009		9.46					14.508	17.859	11.278					11.255	5.493	8.624
															12.033		14.911					12.891	14.014	12.674					9.62	9.398	12.417
															12.454		7.389					13.51	17.272	15.74					11.13	12.478	11.47
[truncated: 3,940 more rows]
