# Supplementary material for: Lifelong regeneration of cerebellar Purkinje cells after induced cell ablation in zebrafish
Source: eLife. 2023 Apr 12;12:e79672. doi: 10.7554/eLife.79672 (PMC10147380; doi:10.7554/eLife.79672)
Supplement: Figure 7—figure supplement 2—source data 1. [file elife-79672-fig7-figsupp2-data1.xlsx]

## Sheet: Hoja1
									Supplem. Fig. 16: diameter PC soma in larvae cerebellum (µm)
									PC-ablated 6dpt	control 6dpt	PC-ablated 8dpt	control 8dpt	PC-ablated 16dpt	control 16dpt	PC-ablated 23dpt	control 23dpt
									6.56	7.293	9.235	6.926	9.925	9.836	8.222	6.823
									5.487	7.009	8.056	6.007	8.731	9.398	9.669	5.697
									7.403	7.573	7.64	6.432	6.985	9.398	9.105	13.926
									5.938	6.31	9.132	7.024	7.109	6.566	8.021	11.828
									7.699	5.956	9.611	6.935	7.454	9.852	7.341	6.585
									7.746	11.168	6.108	6.273	6.863	8.057	8.766	6.571
									5.516	6.689	8.336	6.42	7.408	8.116	7.231	7.231
									7.306	6.834	6.856	8.121	7.83	10.282	7.889	8.896
									5.85	6.221	6.877	7.25	7.396	4.18	6.468	8.896
									5.85	7.427	6.84	7.248	8.673	8.853	9.836	9.964
									7.031	7.897	8.65	5.678	6.442	8.116	7.986	7.111
									6.31	6.516	7.096	7.091	8.223	8.751	8.116	8.025
									6.588	6.138	6.524	7.178	7.774	7.597	10.304	8.283
									6.134	9.471	8.009	5.734	7.543	8.333	9.316	8.085
									5.644	6.828	7.737	8.444	7.635	7.508	8.394	7.021
									7.235	6.221	9.304	6.355	8.41	5.309	8.025	8.085
									6.264	6.732	9.393	6.928	8.353	7.73	9.091	7.003
									7.041	6.89	8.359	5.45	9.823	6.373	7.323	8.394
									5.881	7.777	8.296	6.194	8.144	6.453	9.285	6.313
									7.157	5.691	6.642	6.132	8.223	7.147	7.643	7.116
										5.254	7.492	6.273	10.842	6.438	8.037	8.025
										7.475	7.552	6.803	7.909	6.556	6.948	7.865
									6.79	7.582	8.982	6.14	7.252	6.438	7.431	7.089
									7.075	6.221	9.552	6.52	9.205	5.206	9.126	8.708
									9.169	6.178	8.491	6.452	9.47	6.252	9.9	9.122
									6.072	6.811	7.162	8.696	9.234	9.052	8.751	6.667
									5.833	6.571	6.754	7.186	8.106	7.341	9.465	5.917
									6.16	6.282	6.84	4.947	8.307	7.779	10.964	8.272
									9.365	7.582	6.004	6.712	8.812	8.406	9.878	7.035
									6.73	6.134		7.326	10.424	8.896	9.506	5.538
									7.068	6.89		7.907	7.212	9.929	7.341	7.231
									8.631	6.395	7.316	6.232	8.739	9.347	8.59	8.795
									6.734	6.56	8.916	7.124	8.316	8.95	6.313	8.47
									7.003	6.36	8.702	6.873	10.565	7.341	8.766	8.394
									7.831	6.433	6.351	5.879	8.982	8.406	12.005	8.097
									8.726	7.43	6.877	6.025	7.159	10.233	8.485	6.024
									6.823	7.626	6.746	4.704	6.884	7.111	11.92	6.893
									9.132	5.754	9.274	5.014	7.993	6.869	9.343	8.882
									9.215	6.772	8.756	5.813	8.934	5.107	9.147	6.373
									8.838	5.926	7.737	10.359	12.038	9.861	8.36	8.222
									5.866	6.057	8.061	6.537	6.717	6.628	9.509	9.313
									6.625	7.006	6.507	8.121	8.871	6.776	9.371	7.231
									5.491	8.165	8.366	7.731	5.337	7.865	6.71	8.59
										6.611	7.111	6.693	8.998	6.273	8.466	9.343
										7.618	8.608	6.624	7.635	8.081	9.261	7.495
									7.192	5.85	8.376	5.415	9.775	8.41	13.192	7.142
									6.149	7.094	7.076	5.701	6.247	5.515	11.586	5.725
									6.88	5.773	10.927	6.78	6.428	7.593	9.052	6.985
									7.641	6.732	9.04	6.435	8.335	8.928	11.836	5.607
									7.379	8.566	6.671	6.181	9.509	5.764	10.767	6.103
									8.633	6.012	6.267	6.653	6.829	7.986	8.719	6.585
									7.559	4.786	7.068	5.919	9.532	7.909	8.95	6.024
									6.571	5.835	9.508	6.42	11.466	8.132	7.58	7.865
									7.293	6.533	7.346	8.694	8.523	9.961	9.347	7.328
									7.006	5.045	8.882	7.095	8.656	6.313	7.73	8.226
									8.744	5.588	6.869	5.723	7.442	6.724	7.362	8.466
									9.083	8.526	7.266	6.252	7.071	4.18	6.388	5.647
									7.699	6.101	7.162	6.181	6.566	7.236	6.252	7.68
									8.317	6.571	6.746	6.626	7.377	8.95	10.43	7.478
									7.415	7.157	7.096	6.878	6.884	5.874	7.457	5.89
									6.772	8.672	9.417	7.867	7.318	6.966	7.974	7.58
									7.567	6.906	8.215	6.273	7.099	8.44	5.206	8.349
									8.096	6.642	8.439	7.274	6.192	7.796	6.438	9.105
									7.996	6.834	5.221	5.027	7.048	8.132	7.68	9.374
									6.886	5.971	9.268	6.61	7.147	6.024	8.47	9.052
										5.956	6.416	7.648	8.32	7.271	7.427	8.222
										6.475	6.646	7.335	8.353	7.323	8.842	6.823
									6.732	6.02	7.403	6.78	7.504	10.681	8.645	7.328
									7.592	7.691	7.185	7.378	9.47	7.187	10.549	8.638
									8.715	7.4	7.552	5.822	8.673	8.784	9.384	7.832
									7.357	6.89	7.285	6.537	7.17	8.447	7.986	6.247
									8.352	6.749	6.373	6.648	6.768	9.101	8.842	7.746
									5.906	6.732	8.586	6.914	10.613	9.378	10.063	8.132
									8.032	7.157	7.312	6.944	8.447	8.804	10.054	7.271
									5.767	7.829	6.442	6.78	4.821	7.199	10.214	7.68
									8.135	7.757	6.937	9.286	9.022	9.35	7.889	7.779
									9.225	7.641	7.911	6.547	8.646	7.83	5.77	7.567
									6.867	6.423	8.116	5.689	7.199	9.622	8.025	7.231
									7.533	6.722	6.014	6.454	7.5	8.368	6.247	8.751
									6.551	6.167	7.607	6.481	7.585	7.311	10.43	7.986
									5.055	7.358	9.175	6.007	8.788	9.538	10.151	8.466
										5.233	8.174	8.371	7.117	6.352	10.464	6.066
										6.642	6.746	7.689	7.882	10.199	11.912	7.832
									7.384	8.273	9.074	8.208	6.946	8.512	10.282	10.4
									5.092	7.195	7.201	7.658	8.588	8.714	10.317	8.116
									6.969	5.405	6.676	7.169	8.546	11.073	8.586	8.545
									6.856	6.138	8.068	8.292	8.829	8.146	7.534	8.928
									8.215	7.478	8.495	8.136	7.932	8.058	7.796	9.261
									7.712	7.478	8.521	7.828	7.367	8.588	9.489	7.231
									7.726	6.423	8.727	8.465	9.288	8.075	8.179	9.371
									6.905	7.661	7.08	6.547	6.114	9.249	8.619	8.59
									7.851	6.679	8.309	5.631	9.063	9.093	6.313	7.354
									8.807	7.86	6.941	8.741	8.916	9.03	8.935	9.024
									6.373	4.933	10.54	6.981	5.357	8.531	8.575	7.534
									7.526	5.892	6.671	8.732	6.696	9.676	10.006	7.427
									7.076	5.62		7.607	7.377	7.809	6.061	7.905
									7.189	5.503		7.124	8.106	9.524	5.814	7.457
									7.78	7.403	8.637	6.674	7.425	9.142	8.853	7.726
									8.215	6.264	9.173	6.61	8.372	8.588	9.465	8.025
									7.701	7.182	9.282	5.678	8.588	7.893	7.375	7.362
									6.507	7.475	9.257	8.156	8.179	10.045	8.575	7.68
									5.826	7.091	8.286	9.046	7.606	8.32	9.679	6.247
									7.373	5.754	8.41	6.817	8.506	6.725	8.578	6.002
									6.386	7.582	7.658	6.569	8.091	7.975	9.559	9.094
									6.646	6.289	7.834	6.996	6.744	9.187	8.489	7.461
									8.778	5.12	7.994	6.944	10.102	8.546	7.709	7.427
									6.642	5.393	8.521	6.674	8.94	10.621	9.929	7.668
									6.137	7.829	9.287	5.93	7.585	8.638	7.597	6.686
									6.889	6.938	6.669	8.526	8.04	9.562	10.354	8.708
									7.388	4.823	6.736	7.178	8.179	9.162	8.037	7.746
									4.58	5.516	7.362	6.719	6.744	6.028	7.187	5.051
									5.916	6.05	8.246	5.873	6.781	5.899	9.626	7.828
									6.438	8.424	6.771	5.742	7.199	7.237	10.006	7.147
									5.939	6.278	7.043	6.852	9.224	8.177	10.464	7.567
										6.167	8.047	6.046	8.934	8.133	6.934	6.071
										7.532	8.162	5.447	8.387	8.998	9.066	5.857
										6.749	8.861	5.919	8.575	8.724	7.393	7.362
										7.342	9.342	5.689	7.83	6.146	9.596	8.222
										7.388	7.76	5.622	10.182	8.342	9.108	7.183
										5.808	7.792	6.077	7.793	7.912	7.593	6.318
										6.345	8.711	5.591	7.614	7.578	7.58	7.845
										6.608	6.808	6.871	7.823	9.409	8.575	8.085
										5.014	7.272	6.273	8.038	8.556	8.307	9.15
										6.88	7.905	6.653	5.989	8.205	8.784	6.318
										7.031	7.307	6.59	5.726	7.286	8.838	9.178
										8.162		8.34	8.361	7.964	7.925	9.649
										7.333		6.768	5.505	8.455	13.25	6.061
										5.971	7.453	6.412	7.903	7.765	12.717	6.738
										6.138	9.147	5.972	6.043	8.251	8.057	8.226
										6.09	6.708	7.044	8.731	7.67	7.016	6.108
										5.96	7.317	6.194	6.192	8.091	7.925	9.861
										6.88	7.038	6.355	7.823	7.099	8.245	8.489
										6.571	7.972	7.302	6.539	7.259	6.628	9.147
										5.85	9.914	7.867	6.844	8.625	6.686	8.394
										5.116	10.347	6.981	5.128	7.199	7.832	7.323
										6.338	10.566	6.569	6.064	5.834	7.003	10.72
										6.345	7.487	7.907	7.318	5.85	9.265	7.288
										6.772	7.52	6.824	8.413	7.765	8.081	8.766
										7.107	9.54	6.626	9.472	7.848	9.357	9.371
										5.584	9.762	6.59	7.396	7.726	8.638	9.929
										6.433	8.466	7.804	7.8	8.598	8.025	7.68
										6.264	8.78	5.485	5.85	8.04	8.144	8.428
										7.849	7.84	6.78	7.386	8.153	10.72	9.192
										7.235	7.906	5.742	5.333	9.091	5.814	8.722
										6.134	9.523	6.712	5.81	9.288	9.939	6.609
										4.956	8.348	6.212	9.808	8.615	5.647	8.226
										5.746	9.619	6.315	5.726	9.436	8.485	8.678
										7.629	9.202	5.312	9.164	7.219	8.719	7.111
										6.588	8.163	7.48	7.809	7.408	7.925	7.865
										7.511	6.568	4.989	7.01	6.052	11.088	5.764
										5.326	8.34	5.748	8.457	5.98	6.897	7.58
										7.204	7.449	5.389	6.985	6.409		7.893
										6.53	8.342	7.23	7.232	8.934		5.895
										8.076	8.76	7.607	8.59	14.236	9.261	8.33
										7.107	8.232	6.88	5.593	8.223	7.746	6.985
										4.956	10.416	7.778	7.369	6.607	7.142	10.717
										7.582	9.485	7.724	5.1	7.8	7.593	9.546
										6.772	8.841	6.946	7.099	9.205	5.917	6.082
										7.478	9.094	6.78	7.099	8.904	5.814	8.283
										6.811	8.973	7.158	6.409	8.714	8.896	7.697
											5.019	7.871	7.311	9.689	7.341	7.779
											10.239	5.191	8.654	6.842	7.668	6.966
										6.745	7.784	6.355	8.571	8.284	8.967	7.151
										5.224	6.604	7.051	6.842	6.693	10.788	7.178
										6.782	5.794	6.452	8.011	8.194	10.192	7.905
										5.487	6.781	6.532	7.737	7.504	7.323	8.867
										6.012	8.901	7.162	6.296	8.98	10.546	7.68
										5.503	7.031	7.687	5.85	7.099	7.508	8.871
										7.041	7.038	6.871	8.179	7.635	8.575	7.071
										8.571	8.812	7.017	8.812	9.216	7.909	6.585
										7.293	7.455	6.537		9.162	8.645	6.373
										7.826	7.936	7.421		9.328	8.394	7.909
										8.566	8.701	6.944	10.057	8.731	6.149	7.035
										7.94	6.792	6.61	8.992	6.712	6.966	7.323
										8.038	7.81	7.731	8.025	7.569	7.576	7.68
										7.849	7.826	6.049	8.144	10.102	9.122	7.341
										7.8	10.677	5.591	9.192	8.974	8.307	9.042
										6.886	7.308	6.703	7.668	8.038	6.551	7.495
										6.246	5.429	7.091	8.835	7.54	8.689	7.5
										6.638		6.025	9.492	10.81	10.537	8.928
										8.682		6.481	9.271	8.481	8.545	9.15
										5.536	9.55	6.355	7.889	7.618	7.68	6.551
										7.826	7.021	7.607	9.105	7.547	9.052	8.519
										7.192	7.645	7.131	8.63	7.83	9.347	8.33
										7.406	8.766	5.813	10.158	6.969	9.489	7.142
										5.62	8.986	6.981	7.393	5.726	8.272	6.333
										4.938	7.865	7.341	9.15	6.696	6.934	7.427
										6.443	7.564	7.178	6.869	6.987	9.126	10.104
										6.433	6.827	6.295	8.82	6.166	9.9	8.619
										6.488	8.766	6.74	8.645	5.463	8.159	9.052
										7.803	9.45	6.37	10.282	7.857	7.116	8.349
										7.403	8.73	8.727	9.479	7.884	8.41	6.672
										7.204	8.73	7.919	7.508	6.844	11.912	6.609
										6.105	7.52		7.375	8.035	9.489	6.333
										7.135	7.645		9.398	7.232	7.003	6.468
										7.783	7.976	7.86	7.668	6.213	8.132	7.328
										8.04	10.677	6.043	7.845	8.615	8.678	8.337
										6.983	9.944	6.885	5	8.714	10.357	6.002
										6.821	8.957	5.935	6.966	6.566	7.905	8.571
										8.107	8.873	7.236	5.89	5.317	7.865	7.231
										7.002	7.098	7.267	8.519	8.327	8.489	7.111
										4.865	8.787	7.236	11.077	4.327	10.537	7.534
										4.653	8.436	8.121	8.896	5.453	7.634	7.597
										6.488	6.891	7.138	6.837	4.739	8.44	7.746
										4.938	6.319	5.125	10.317	7.614	7.142	9.626
										6.345	6.827	8.864	8.159	7.367	9.347	6.585
										5.695	9.069	5.94	8.41	8.146	6.393	8.037
										6.622	7.936	6.286	10.633	7.212	7.431	8.025
										6.149	6.106	5.747	9.182	4.356	8.085	7.183
										6.56	10.777	6.986	11.836	10.675	9.665	6.799
										5.99	8.701	7.394	9.285	8.389	8.41	6.571
										7.031	9.589	5.031	8.708	7.964	7.68	5.369
										7.982	11.054	8.524	9.506	7.286	9.929	9.154
										5.62	8.78	6.901	9.035	7.966	8.132	9.066
										6.622	9.234	7.232	8.638	8.17	8.545	9.343
										6.759	8.873	8.414	11.163	7.259	9.052	6.113
										6.516	8.894	6.48	10.847	7.644	10.104	8.057
										6.363	8.414	5.309	7.116	6.451	8.368	7.478
										5.835	8.031	5.935	11.114	6.831	8.037	5.309
										6.516	8.643	5.46	10.621	4.735	8.349	8.085
										5.288	9.207	5.935	8.307	7.504	6.517	7.929
										6.433	9.069	7.556	11.858	6.204	9.599	8.853
										6.516	7.186	5.935	11.434	9.224	8.485	6.571
										6.36	7	8.787	10.006	7.635	6.823	5.89
										6.105	5.806	8.736	9.923	9.205	12.039	6.566
										6.289	5.723	6.748	8.957	4.84	8.368	6.451
										7.278	8.308	7.394	9.9	7.117	8.025	6.829
										6.821	8.901	9.17	11.251	6.596	7.129	5.773
										7.031	8.194	7.645	11.077	6.744	8.466	7.031
										6.834	8.986	5.419	8.179	7.786	8.337	7.635
										8.162	7.784	8.176	10.618	5.032	8.545	6.517
										5.971	7.787	8.268	8.928	6.954	9.15	6.114
										6.138	8.436	7.704	7.576	4.735	8.021	7.912
										6.89	6.065	6.652	10.217	9.487	8.842	8.72
										5.754	9.816	8.197	9.154	6.744	10.082	7.008
										6.167	6.991	6.414	12.314	7.197	8.283	8.542
										6.278	8.171	6.719	7.151	6.776	7.909
										6.638		7.664	10.767	4.829	8.586
										6.689		7.762	7.865	9.122	8.867	7.231
										7.031	4.614	6.392	7.8	6.273	10.164	5.986
										6.09	7.976	10.1	8.835	5.39	8.159	6.823
										6.105	8.101	5.522	11.214	7.54	9.105	6.113
										6.377	9.048	10.142	9.285	7.774	9.105	8.152
										4.992	7.317	7.011	10.455	9.242	7.925	6.373
										8.038	7.411	10.812	8.021	9.063	9.99	6.776
										6.772	9.765	8.121	10.797	7.076	10.057	7.5
										6.638	7.587	8.075	7.534	7.038	9.939	7.362
										7.094	7.936	6.922	7.151	6.304	8.928	6.211
										5.956	8.816	7.22	7.986	5.77	10.255	7.284
										6.395	7.545	9.087	10.025	8.387	8.784	7.288
										5.588	9.09	7.788	13.192	6.134	7.986	7.354
										5.417	8.979	8.121	6.893	6.273	10.412	6.333
										5.754	7.385	7.906	9.848	6.564	8.751	6.328
										7.852	6.525	9.238	5.96	8.091	8.47	7.865
										5.96	8.046	8.313	8.097	8.164	8.578	5.83
										7.041	6.991	8.086	8.928	8.646	8.63	7.427
										5.866	5.371	7.394	8.489	7.099	7.796	8.394
										6.906	8.78	6.053	7.534	7.802	7.427	5.113
										6.057	7.045	4.227	10.455	9.878	8.489	7.974
										6.929	8.171	5.864	6.795	8.998	10.006	5.764
										7.573	9.899	6.566	8.283	9.162	9.292	6.571
										6.433	7.045	9.164	8.645	8.106	8.489	8.085
										6.611	7.976	9.219	7.375	7.606	9.583	5.44
										7.185	7.487	9.133	6.643	9.403	8.428	5.814
										6.588	9.887	7.451	8.751	6.517	8.63	7.044
										7.241	7.142	8.121	8.619	4.154	8.809	4.857
										5.695	7.587	7.283	9.929	7.578	9.861	7.508
										6.638	7.462	7.751	6.585	7.675	11.997	7.147
										6.149	6.198	7.455	7.832	5.698	7.779	7.68
										5.892	7.595	6.272	7.593	4.47	11.978	8.967
										7.031	6.827	7.047	6.585	7.132	8.575	7.178
										6.811	6.428	6.652	7.693	6.65	8.132	7.576
										6.611	7.453	8.797	7.58	10.339	8.053	9.506
										6.642	7.661	7.601	10.101	7.991	6.86	5.273
										5.076	8.979	7.729	7.003	9.426	9.013	5.327
										6.821	7.678	8.282	8.256	8.638	9.178	10.226
										6.192	6.891	7.451	12.425	6.367	9.836	8.037
										5.326	8.316	8.072	7.697	9.162	8.428	6.566
										5.85	7.88	7.722	7.431	6.478	10.788	7.84
										7.293	6.033	6.723	8.867	6.661	8.132	7.746
										5.584	8.787	6.702	9.261	8.523	8.394	5.351
										5.746	7.784	8.394	8.256	9.148	9.715	7.68
										8.999	7.278	6.802	9.285	9.257	8.838	8.33
										6.745		9.344	7.832	8.92	8.116	7.643
										6.772		6.549	7.231	8.387	11.408	4.552
										6.402		7.333	12.163	6.86	7.151	5.578
										7.179		7.545	8.638	8.745	8.47	6.492
										5.384		8.484	7.111	8.506	9.313	7.925
										5.516		9.425	6.473	8.98	11.185	5.675
										6.246		6.613	9.806	7.809	10.057	6.837
										5.808		6.753	7.779	7.543	6.333	8.349
										7.13		5.643	9.105	7.585	7.974	7.187
										7.788		8.169	6.893	7.01	9.599	6.837
										9.811		4.801	7.427	8.47	7.427	9.609
										7.068		8.716	7.271	7.286	8.097	8.245
										7.188		5.522	6.897	9.914	7.362	8.82
										5.059		7.586	7.341	8.984	7.828	7.375
										6.812		6.532	9.216	7.355	8.95	7.187
										6.929		6.519	8.645	8.035	8.519	7.362
										6.123		7.329	9.465	6.912	9.398	6.438
										5.837		8.56	7.68	8.556	6.897	6.799
										5.963		8.169	7.111	6.253	8.144	7.231
										6.16		7.455	7.796	8.04	9.182	6.985
										7.313		7.059	8.645	9.091	10.859	8.36
										6.849		7.314	8.194	9.472	9.182	8.159
										5.695		8.103	9.642	10.088	8.368	6.492
										6.695		6.715	8.645	6.842	9.465	6.103
										6.695		7.011	9.216	8.046	7.271	9.374
										6.552		7.451	7.534	8.877	8.578	6.165
										6.975		5.698	12.145	6.768	7.68	10.366
										6.506		8.56	10.18	7.625	7.341	6.643
										6.041		8.292	9.192	8.038	9.066	7.323
										6.121		7.751	10.363	8.438	8.085	8.751
										7.596		6.458	7.5	7.67	6.373	7.576
										7.71		7.011	11.375	9.099	10.18	6.333
										6.345		8.197	6.776	8.575	8.82	8.697
										4.537		8.921	7.986	7.635	9.357	8.394
										6.755		5.839	9.347	6.863	10.503	7.828
										4.897		8.35	9.374	9.327	7.534	6.799
										5.649		7.601	9.861	8.575	8.751	5.538
										6.79		6.647	9.192	9.063	7.58	5.327
										5.609		8.787	10.743	7.774	6.103	7.68
										6.814		9.76	9.479	6.954	7.236	9.679
										6.475		9.353	7.431	8.575	8.44	8.337
										6.475		7.314	9.609	8.33	7.427	5.44
										7.249		9.943	9.374	10.226	8.245	6.252
										5.534		9.392	10.903	7.362	9.546	8.59
										6.219		8.34	9.357	7.375	8.245	7.697
										6.244		9.344	8.751	8.47	6.966	7.075
										6.371		6.458	9.559	7.84	6.313	8.368
										6.171		8.2	9.313	10.129	8.619	5.675
										6.783		9.742	8.226	6.473	9.347	7.147
										6.926		10.351	7.909	7.341	7.634	6.799
										5.895		9.128	8.057	9.718	8.307	6.313
										5.16		7.236	10.366	5.544	9.669	7.929
										7.736		6.601	7.865	6.985	7.832	6.082
										6.173		10.424	9.626	8.59	6.724	4.877
										6.381		8.55	8.896	9.679	8.545	7.697
										6.541		9.307	11.641	7.796	6.818	7.129
										6.882		9.356	8.82	6.566	7.905	9.744
										5.273		6.885	8.63		8.364	7.003
										7.852		6.584	9.108		8.708	9.599
										6.823		7.421	7.84	9.519	7.534	7.534
										6.074		8.924	10.885	10.809	8.226	6.438
										4.856		5.698	5.83	12.226	7.178	7.288
										6.25		5.737	8.59	9.546	8.578	7.643
										5.042		8.642	8.645	9.313	9.15	8.222
										7.388		8.072	10.6	9.435	8.619	8.619
										6.958		10.47	13.592	10.18	9.247	6.672
										6.958		7.363	10.158	8.245	9.394	7.68
										6.103		7.545	8.928	9.465	10.226	5.538
										7.374		7.185	7.634	8.678	7.857	6.609
												7.733	9.091	9.806	7.003	6.333
												6.986	8.394	8.575	9.609	7.231
										6.958		9.496	9.479	8.307	7.129	7.8
										5.683		7.892	7.746	6.468	11.214	5.944
										8.421		8.563	8.33	7.929	9.599	5.538
										7.869		10.142	8.132	8.394	7.668	5.578
										9.798		7.86	9.465	8.925	7.183	6.108
										7.358		7.507	8.368	8.485	9.599	6.313
										5.777		9.699	8.519	10.151	10.72	7.461
										8.463		7.22	7.68	7.905	9.126	7.075
										8.049		6.191	8.33	10.226	8.967	8.545
										6.834		8.169	8.144	8.708	8.144	8.708
										6.98		9.768	8.645	7.986	9.343	7.362
										5.986		7.671	10.609	8.925	7.68	7.534
										7.107		8.758	7.5	8.545	7.534	6.948
										7.451		7.575	8.132	9.316	9.435	6.799
										8.26		8.937	10.509	8.601	8.245	10.006
										6.363		6.584	9.122	9.374	6.438	7.974
										6.906		6.901	7.142	9.105	7.929	7.044
										6.016		6.922	10.381	7.845	9.546	7.393
										6.392		7.059	8.708	7.5	8.751	7.893
										6.722		6.173	8.428	9.715	8.41	7.116
										6.05		8.309	6.237	8.928	8.037	7.231
										6.719		7.571	9.649	7.893	9.313	6.985
										7.982		7.788	9.384	7.693	6.893	7.075
										6.557		8.484	8.222	11.214	8.638	6.556
										6.557		9.365	7.427	7.909	6.211	5.327
										5.691		6.685	12.747	7.142	6.948	8.689
										6.221		6.173	9.609	8.586	8.578	7.746
										7.185		6.584	9.285	8.152	6.571	6.082
										6.167		6.848	7.845	9.091	8.132	6.438
										6.749		9.614	8.95	6.551	8.63	5.83
										7.475		7.22	9.024	7.68	8.992	7.016
										7.342		7.011	9.374	7.508	7.832	7.643
										8.107		7.541	8.144	7.832	9.105	7.58
										8.466		6.922	10.537	9.492	7.832	7.84
										7.195		7.363	9.492	8.222	8.179	6.191
										6.349		5.466	8.394	7.323	9.261	5.895
										5.584		7.935	7.393	9.923	9.649	6.799
										5.384		6.458	6.252	7.905	8.925	6.273
										6.977		7.729	7.341	6.061	8.601	6.966
										6.782		9.133	9.147	9.013	7.393	6.686
										5.777		6.652	6.393	8.575	8.41	6.672
										6.958		7.977	8.222	6.393	7.495	8.097
										5.487		7.263	10.057	7.111		6.738
										8.325		8.642	8.394	7.889		7.58
										6.488		6.104	7.925	7.478	7.328	7.393
										8.054		8.43	8.867	9.394	10.063	6.556
										5.96		7.762	10.964	6.738	5.895	7.341
										5.746		7.455	6.724	7.178	7.323	7.035
										7.241		7.751	8.916	7.183	8.689	6.738
										8.076		9.883	8.385	7.362	7.427	6.333
										8.054		8.787		8.025	7.534	6.453
										7.427		7.809		6.934	5.814	7.709
										8.675		9.455	8.925	6.071	7.111	7.534
										7.11		8.103	9.013	7.341	9.316	7.231
										7.031		7.263	8.545	8.708	6.237	6.556
										7.379		9.641	11.78	8.838	7.323	5.917
										6.722		7.838	9.806	5.422	5.83	7.478
										7.367		5.873	9.669	6.438	6.585	7.58
										5.892		6.885	7.431	6.823	6.071	7.457
										6.828		6.245	9.529	8.057	5.89	7.375
										6.061		7.597	10.158	7.231	6.556	5.96
										6.56		6.519	9.836	7.075	6.438	6.313
										5.808		7.451	7.845	8.337	6.609	7.071
										8.054		8.414	8.82	8.394	7.709	6.799
										4.639		7.138	7.726	8.466	6.237	7.003
										5.892		6.596	7.597	7.231	8.722	8.069
										9.278		7.209	9.271	6.934	6.108	5.986
										8.162		7.455	7.832	6.438	8.394	5.544
										5.971		7.541	8.935	9.182	5.538	7.68
										7.982		8.394	7.129	7.779	11.183	4.643
										3.934		7.015	8.722	9.492	8.967	6.165
										6.929		6.798	7.534	11.674	5.357	6.985
										5.028		6.549	8.256	7.68	8.41	7.044
										7.903		6.458	9.122	10.107	8.601	9.394
										7.92		7.541	7.231	8.795	7.845	8.085
										6.178		7.047	9.435	9.066	9.105	6.108
										6.638		5.742	6.686	7.68	6.438	6.609
										7.031		6.392	7.534	8.41	6.643	7.231
										4.956		7.394	6.985	7.697	9.013	6.818
										7.192		10.588	8.871	8.037	8.132	6.191
										8.082		7.209	9.689	7.354	6.585	6.211
										8.526		8.529	7.428	8.751	7.111	5.764
										7.928		6.584	7.471	9.679	10.226	6.313
										8.964		8.937	8.153	9.836	10.279	7.271
										7.542		8.114	10.182	7.576	5.2	7.427
										5.877		8.56	10.007	6.609	7.905	7.003
										8.537		7.047	11.962	7.865	9.546	6.893
										7.86		7.496	8.646	11.464	10.455	6.468
										8.631		8.292	7.728	8.394	4.072	6.799
										7.427		7.86	8.146	8.575	8.645	6.517
										5.727		9.025	6.114	7.457	9.042	4.765
										6.533		8.58	6.12	7.089	9.271	6.609
										6.642			9.403	8.337	11.025	8.116
										6.278			11.864	6.934	6.893	8.283
										7.031		7.345	11.011	9.744	8.485	8.896
										6.246		7.173	10.822	7.323	10.455	5.647
										7.135		6.415	10.068	6.776	7.534	8.222
										6.608		7.012	9.355	7.865	7.071	6.313
										6.745		6.679	9.251	7.111	10.226	7.362
										6.095		6.013	9.14	9.122	9.15	5.538
										6.095		8.251	12.691	9.15	6.628	5.83
										6.906		6.328	8.81	10.964	8.719	7.845
										8.346		6.523	7.767	10.964	8.085	5.369
										6.851		7.924	8.712	7.58	8.337	6.667
										8.879		6.372	6.052	7.375	8.697	7.5
										6.123		5.172	8.588	7.142	9.465	7.288
										7.023		7.173	9.75	6.672	10.621	8.025
										7.591		6.79	7.73	12.568	10.101	8.272
										7.023		5.172	8.638	8.053	7.341	7.071
										8.811		5.704	11.217	6.237	11.464	6.438
										7.34		6.19	8.904	6.818	10.464	7.929
										8.528		6.553	8.153	6.837	8.057	5.874
										7.876		7.326	8.875	6.795	6.373	6.966
										9.665		7.881	9.371	6.149	8.132	5.561
										7.4		5.347	10.648	6.428	8.95	8.337
										7.657		7.357	9.317	8.489	8.081	7.832
										7.169		6.409	6.948	7.035	7.746	7.925
										6.512		5.967	8.835	9.428	7.534	6.799
										7.675		6.509	10.313	7.68	8.489	5.911
										6.522		6.377	7.071	8.44	7.231	6.893
										7.938		6.086	7.048	8.619	7.111	4.359
										9.284		7.754	8.413	10.101	6.571	7.111
										7.521		6.807	7.159	6.667	7.288	7.832
										9.044		6.35	9.187	4.517	7.341	6.837
										5.452		5.912	8.205	5.96	8.697	6.551
										8.669		7.254	11.945	7.362	7.58	6.934
										6.123		5.223	9.775	6.492	5.725	6.985
										6.764		5.704	8.821	8.957	7.478	7.288
										8.022		6.091	6.985	7.075	7.341	6.358
										7.094		6.009	9.674	6.818	8.95	6.149
										7.674		6.889	8.706	7.231	5.808	6.823
										8.45		5.802	7.219	8.853	6.985	6.473
										6.849		7.508	9.036	6.738	8.59	6.667
										8.177		6.006	7.912	9.024	7.328	7.478
										6.095		8.986	6.776	8.485	8.037	8.194
										6.665		6.934	7.964	7.709	9.105	5.911
										6.062		6.38	9.85	7.427	7.709	7.142
										7.041		7.96	8.251	8.116	5.082	8.466
										7.463		8.259	8.353	5.944	7.142	6.667
										8.503		5.321	6.844	7.709	7.151	7.075
										7.219		5.414	6.842	5.082	7.341	4.293
										5.552		7.044	7.964	5.607	6.799	7.746
												7.008	6.954	8.689	5.556	7.457
												5.759	9.47	8.144	9.9	7.597
										6.264		5.775	7.765	9.9	7.929	7.142
										6.361		7.13	7.396	6.566	6.333	6.517
										5.535		5.794	7.597	7.5	6.869	5.051
										6.224		7.278	8.372	6.333	5.538	5.607
										7.296		6.564	9.224	7.075	7.828	6.869
										6.669		5.509	5.096	6.869	7.68	6.165
										5.546		7.95	8.144	7.354	6.318	5.89
										5.68		6.269	8.438	7.393	7.183	6.492
										8.082		7.542	6.696	7.044	8.116	6.113
										7.02		6.825	8.223	6.724	7.142	6.799
										7.08		7.896	7.01	7.597	7.003	6.103
										6.42		6.024	8.91	10.054	6.473	6.566
										6.843		5.89	7.635	7.726	6.795	5.675
										7.901		6.333	8.812	8.41	5.544	7.075
										7.142		7.896	6.276	6.985	9.024	7.534
										6.707		6.504	7.197	7.668	9.546	8.272
										6.291		6.639	8.731	8.722	9.192	7.779
										7.29		7.389	7.389	6.002	6.061	6.556
										5.897		6.086	7.389	7.021	7.508	7.151
										5.472		7.068	6.531	6.585	7.779	7.075
										7.151		8.251	8.904	6.144	7.003	8.132
										6.732		7.758	7.786	6.551	9.192	5.181
										5.846		4.905	4.581	8.63	8.194	6.438
										6.15		7.022	6.27	7.547	8.545	5.303
										6.06		6.407	6.744	8.223	5.44	6.628
										6.388		6.024	6.451	7.543	7.478	5.986
										6.388		6.889	5.609	6.717	11.03	6.438
										6.38		4.763	12.559	7.957	10.006	8.545
										6.565		5.74	7.793	8.046	6.667	6.468
										6.514		6.477	7.67	8.146	5.369	6.393
										7.272		6.825	8.199	8.361	6.165	6.585
										6.109		6.658	6.352	7.367	8.085	6.318
										7.941		6.869	7.425	7.95	8.283	7.845
										7.08		5.414	8.216	6.696	10.476	5.83
										7.122		7.338	6.831	6.539	6.318	7.035
										7.369		5.028	6.064	7.878	7.341	6.393
										6.669		7.119	6.768	7.504	8.575	9.529
										6.555		6.17	6.672	8.556	5.89	9.042
										5.913		7.293	6.717	6.23	6.165	6.585
										6.163		5.621	6.776	7.286	9.035	6.667
										7.107		6.564	5.81	6.321	6.985	5.758
										8.243		6.231	5.899	8.205	9.042	7.461
										6.324		6.024	5.899	8.556	6.165	6.893
										6.241		8.981	7.355	7.543	5.764	5.814
										7.494		6.724	7.614	6.099	8.406	7.614
										7.62		6.259	8.41	6.936	7.925	6.066
										7.231		6.221	7.519	8.146	7.044	9.616
										6.203		7.465	11.578	9.657	4.552	6.86
										4.973		5.414	9.75	8.413	9.042	7.016
										7.517		8.732	7.966	7.543	6.566	6.165
										7.739		6.639	7.119	6.768	8.601	7.393
										6.42		5.059	7.276	6.052	9.599	7.003
										8.128		6.377	5.81	6.409	11.542	7.044
										6.013		6.721	7.618	8.011	8.586	8.245
										7.033		6.412	7.765	7.139	9.316
										6.909		7.312	7.635	6.615	8.578
										6.109		6.604	7.109	6.33	8.489	9.066
										7.61		6.934	10.382	7.408	9.878	10.301
										5.749		6.525	8.146	7.519	6.628	9.147
										7.283		6.313	7.71	7.772	7.236	8.545
										7.033		7.448	7.369	8.413	7.116	7.089
										8.219		6.509	5.71	6.985	7.183	9.154
										6.221		8.433	6.464	7.991	10.39	11.123
										6.026		5.775	5.492	5.505	8.272	8.766
										6.505		6.907	8.523	7.212	5.206	9.428
										5.388		8.71	5.306	6.169	7.597	8.896
										6.634		7.254	5.797	7.512	5.764	7.111
										5.784		6.407	7.207	6.364	7.534	7.68
										6.261		6.438	10.424	6.099	7.111	7.393
										5.639		8.014	8.223	7.048	8.928	9.122
										6.269		7.254	8.223	7.786	7.828	9.285
										6.449		7.323	8.406	7.199	4.643	9.105
										6.746		6.37	8.438	8.413	6.393	8.678
										6.77		7.556	8.731	7.396	8.882	12.249
										6.593		9.553	9.538	8.867	10.226	7.231
										6.221		6.523	7.289	6.564	8.59	4.877
										6.66		7.758	8.135	8.058	9.313	10.363
										6.93		6.88	9.661	8.558	10.354	6.869
										6.449		6.724	9.85	8.091	8.053	7.796
										7.42		6.079	9.511	8.81	7.832	8.485
										5.995		7.22	9.328	7.569	7.8	7.284
										6.735		6.014	8.091	7.252	10.926	9.492
										6.818		7.722	8.556	8.327	7.986	7.341
										6.488		7.91	6.948	6.439	8.394	6.869
										7.375		6.333	6.946	8.893	6.86	11.025
										6.309		7.679	7.219	6.352	6.024	7.341
										6.047		6.97	7.442	8.625	8.144	6.897
										6.343		5.4	6.653	6.818	8.021	7.375
										5.4		8.289	8.656	8.447	8.428	6.609
										5.784		7.736	8.353	7.543	6.818	9.178
										7.212		6.055	7.117	7.67	7.075	7.8
										6.241		8.674	6.76	7.606	6.71	7.393
										6.641		7.608	8.575	6.894	9.261	7.495
										6.055		6.646	8.153	9.409	9.126	8.835
										6.514		7.357	8.361	8.829	8.795	4.468
										5.285		6.438	9.555	8.32	7.693	7.354
										7.053		7.286	7.259	8.523	9.398	8.766
										6.558		6.583	7.878	6.946	8.245	11.912
										7.033		6.504	8.714	7.774	9.806	8.689
										5.956		6.13	7.765	6.725	8.222	5.422
										5.9		7.679	9.162	7.543	7.779	8.619
										5.871		6.132	9.187	8.177	4.233	9.961
										6.735		5.486	8.342	7.408	8.992	8.47
										5.942		7.608	8.638	7.259	8.925	10.366
										6.946		8.438	9.472	7.139	7.362	9.271
										6.024		8.625	9.311	9.148	9.679	10.476
										6.291		7.022	8.353	7.614	7.73	7.865
										6.534		7.254	7.597	8.575	8.132	8.307
										5.63		5.202	9.943	7.726	6.273	8.47
										6.519		6.604	8.406	7.425	5.107	9.216
										6.338		6.17	9.045	8.546	6.893	7.231
										5.849		6.523	7.635	9.311	9.271	7.974
										6.201		7.357	8.982	7.259	9.506	7.231
										6.669		7.679	7.635	7.396	8.025	9.757
										5.504		6.438	5.98	7.092	7.116	9.261
										5.309		6.341	7.986	7.199	10.743	10.354
										7.095		6.523	7.576	8.72		8.95
										5.535		6.409	8.545	6.615		9.9
										6.634		6.037	9.313	7.286		10.063
										5.535		6.583	7.341	8.307		8.678
										6.919		6.281	6.551	7.991		8.853
										6.279		7.139	7.828	7.031		9.964
										7.168		6.772	9.271	7.018		9.066
										5.811		6.658	9.374	7.8		8.144
										5.458		6.834	5.082	7.377		7.183
										7.827		6.523	9.702	7.099		7.016
										6.4		7.463	7.044	8.692		6.333
										6.742		8.161	7.779	8.525		11.542
										4.754		5.88	5.44	6.969		8.179
										6.361		7.008	6.313	6.894		8.838
										6.77		7.722	9.374	7.578		7.986
										6.66		7.361	7.222	9.75		6.453
										6.351		5.028	7.075	7.661		7.576
										6.055		5.761	8.394	8.223		9.15
										6.765		8.23	10.738	6.829		10.354
										7.142		5.486	9.848	9.298		9.806
										5.458		6.825	9.616	7.237		10.72
										6.657		5.142	7.576	6.912		8.697
										6.065		8.009		8.284		7.089
										6.309				7.119		9.852
										8.113			8.489	9.236		8.41
										5.11		7.286	7.044	8.144		8.307
										6.534		5.492	7.163	11.307		9.192
										5.435		6.807	7.903	8.214		10.025
										6.14		6.658	6.629			7.341
										5.397		7.008	6.596			8.601
										5.9		7.679	7.428	5.751		8.025
										6.024		6.724	7.841	9.063		7.427
										6.241		7.271	7.519	8.904		5.309
										6.198		5.88	6.564	5.57		6.985
										6.836		6.97	8.053	5.989		7.508
										7.126		7.389	6.304	8.307		10.057
										7.298		6.675	7.396	6.717		7.828
										6.909		6.39	8.17	6.884		4.745
										6.615		6.525	6.478	5.276		6.71
										7.62		5.715	6.842	6.596		6.333
										6.912		6.153	5.65	5.92		9.546
										6.591		6.494	7.396	6.028		7.905
										6.98		5.388	6.23	4.273		9.878
										5.889		6.409	8.327	5.505		9.357
										6.224		7.163	7.447	4.273		11.35
										6.198		7.752	6.865	7.767		9.948
										7.142		6.937	5.85	6.946		8.245
										6.912		6.937	6.631	7.578		9.147
										5.661		7.801	6.539	9.47		6.934
										6.514		6.566	5.874	5.173		10.214
										5.073		6.438	6.108	7.028		8.085
										6.746		5.783	6.936	7.786		8.245
										6.241		7.752	7.991	6.626		8.406
										5.501		7.801	6.946	5.333		7.375
										6.593		6.919	6.367	7.237		7.231
										6.5		7.481	6.099	6.439		7.111
										6.982		7.044	5.751	8.745		7.534
										7.305		6.907	7.289	7.809		8.82
										5.268		5.88	8.489	8.47		8.809
										6.742		5.463	5.847	6.389		8.755
										6.505		7.898	6.04	6.661		9.519
										4.538		7.639	7.408	6.964		7.003
										5.501		5.554	6.509	6.442		6.667
										5.159		5.593	8.058	8.011		8.601
										6.198		7.991	7.396	7.635		7.779
										6.117		6.88	5.682	5.883		8.601
										4.661		5.663	7.031	7.031		7.341
										4.926		7.801	6.099	7.67		8.809
												7.595	5.834	7.909		7.183
												6.88	6.464	6.821		7.857
										7.122		6.259	7.691	7.249		7.845
										7.502		5.526	6.818	8.512		11.486
										5.713		6.037	6.531	6.725		7.597
										6.065		4.993	6.146	7.199		8.144
										6.378		8.683	6.936	8.223		7.187
										5.268		7.521	7.984	6.321		9.748
										5.94		7.608	6.539	5.505		8.575
										7.449		6.079	6.052	8.258		7.231
										5.546		6.639	6.367	7.774		7.576
										6.77		7.226	7.625	7.71		8.645
										6.686		6.77	9.093	9.785		7.68
										7.033		6.109	5.531	6.831		7.328
												5.88	5.989	6.964		10.006
										7.665		5.985	7.311	6.626		6.869
										7.305		6.409	7.071	7.129		10.381
										7.131		6.037	6.464	6.8		7.021
										6.505		5.671	5.685	7.199		7.075
										6.417		7.504	8.179	7.772		8.256
										6.732		6.759	8.372	7.964		7.183
										7.608		6.63	8.04	7.597		7.288
										6.388		8.289	6.696	7.786		5.561
										5.897		6.407	9.726	6.539		7.857
										6.013		6.77	7.212	7.212		8.021
										6.816		5.696	7.031	6.367		8.081
										6.378		6.609	6.948	6.912		8.025
										6.657		5.38	8.904	8.159		8.144
										5.811		7.217	5.874	7.83		9.455
										7.508		6.828	7.966	11.52		9.182
										5.327		4.812	7.618	8.523		7.925
										6.982		5.66	6.574	6.831		10.025
										6.338		6.178	6.273	8.638		6.585
										8.65		5.006	7.54	7.442		7.68
										6.534		7.361	7.492	7.259		8.144
										6.388		6.37	6.464	7.01		7.845
										6.013		6.735	7.212	6.969		6.313
										6.657		6.37	6.478	7.259		7.151
										7.373		7.163	5.81	5.751		7.58
										7.827		6.38	6.451	8.904		7.865
										6.034		5.202	6.607	5.947		5.538
										7.475		6.201	6.672	7.635		5.206
										5.768		5.759	7.903	6.442		6.686
										5.844		5.663	7.008	6.969		9.013
										5.268		6.759	5.427	7.237		8.708
										6.816		6.024	7.099	7.048		7.075
										5.602		7.095	6.954	8.575		8.59
										6.388		7.791	5.65	5.899		6.328
										5.844		6.377	9.487	7.786		3.993
										6.619		6.37	7.774	7.504		5.357
										5.602		7.637	7.367	6.829		4.805
										6.77		8.638	6.184	8.41		6.585
										6.657		5.802	6.204	6.296		5.917
										7.305		7.608	7.464	8.301		6.252
										6.096		6.882	7.728	7.675		5.082
										7.166		6.298	8.447	7.765		6.313
										6.843		6.807	5.947	9.538		6.273
										5.713		6.547	8.301	8.335		8.025
										6.742		5.426	7.367	8.038		8.751
										6.742		6.898	5.117	9.216		5
										6.723		6.431	7.428	8.556		6.628
										6.806		7.119	6.596	6.696		8.085
										6.88		7.515	6.451	7.355		10.363
										6.096		6.221	8.974	7.712		6.799
										6.816		5.509	8.389	11.2		6.468
										7.033		6.772	9.154	6.04		6.144
										5.768		9.199	7.386	8.32		5.77
										6.723		6.545	11.15	8.829		4.233
										6.024		6.407	7.618	6.936		5.351
										5.669		6.686	7.914	6.431		8.364
										7.475		7.437	7.471	8.673		7.044
										7.095		6.979	8.843	9.775		7.693
										6.279		5.503	8.855	9.298		5.725
										4.62		7.254	9.236	6.33		3.041
										6.378		7.408	7.369	8.216		8.33
										5.768		7.431	6.946	8.301		9.216
										6.534		7.156	6.169	7.316		6.517
										7.175		7.271	5.622	7.54		6.799
										7.963		6.805	8.41	8.689		3.051
										7.963		7.293	6.964	9.511		7.889
										7.087		6.016	8.654	6.531		9.718
										5.897		5.671	8.091	6.842		5.808
										9.435		7.075	7.903	6.912		6.438
										6.055		5.985	8.438	6.108		8.394
										7.867		7.508	8.98	8.984		6.823
										6.269		6.438	6.364	9.375		6.686
										6.198		8.067	7.728	8.199		6.934
										6.534		7.96	7.454	7.984		6.818
										6.591		6.377	7.109	8.974		7.567
										7.015		6.16	7.802	7.311		6.985
										5.897		5.537	7.957	6.818		7.075
										8.242		5.391	6.296	8.04		5.607
										5.512		6.898	7.547	8.053		5.96
										5.409		5.88	6.969	7.512		7.035
										5.713		7.022	8.333	8.179		5.593
										7.296		5.391	8.216	8.011		4.678
										6.034		6.547	7.966	6.204		5.57
										5.602		6.477	6.574	7.018		5.609
										5.546		6.259	9.472	6.134		4.549
										6.77		6.968	10.774	9.344		7.882
										6.279		7.431	9.35	7.099		6.776
										5.713		6.869	7.578	7.249		3.721
										6.388		7.156	7.207	6.725		6.936
										6.288		7.372	8.47	7.912		4.154
										6.982		6.487	5.117	9.122		7.031
										8.004		5.449	5.238	7.071		8.904
										5.921		6.086	6.776	6.653		5.082
										7.142		7.284	7.207	8.199		6.946
										5.504		5.202	7.786	5.944		8.714
										7.845		8.148	7.957	8.385		3.863
										5.33		7.075	8.638	7.802		4.273
										6.142		6.05	8.47	6.954		5.169
										7.443		6.509	5	7.289
										6.946		6.77	7.635	6.768
										5.921		6.504	8.32	8.525
										6.5		6.609	6.696	6.8
										6.707		6.58	6.304	6.253
										6.5		6.712	9.063	7.585
										6.558		6.759	8.821	8.786
										6.536		8.39	7.774	8.934
										6.669		7.217	9.257	6.964
										6.264		7.363	7.159	7.95
										7.933		7.857	7.691	7.099
										6.919		5.38	7.031	6.615
										7.027		6.37	5.77	6.894
										6.224		5.449	6.615	9.045
										6.534		6.191	6.442	7.726
										7.718		6.489	7.993	5.347
										6.024		6.494	5.631	6.192
										6.806		5.704	6.484	6.776
										5.186		6.889	7.614	6.842
										6.641		5.509	10.243	6.631
										5.871		6.977	6.296	8.413
										6.096		6.759	6.478	12.507
										6.536		6.259	6.253	6.364
										6.88		6.368	5.76	6.478
										8.18		4.965	6.542	7.774
										6.619		6.675	6.204	6.946
										7.7		6.504	8.447	7.249
										6.619		6.523	7.691	7.975
										8.004		6.523	7.712	7.504
										7.923			7.547	6.35
										5.849			7.597	7.878
										6.641		9.129	7.726	8.41
										6.119		8.409		7.311
										7.718		8.067		8.011
										6.034		8.556	12.822	7.578
										6.79		9.198	9.394	8.064
										6.497		7.11	8.085	7.991
										5.995		6.024	8.179	8.353
										6.982		5.259	9.583	8.982
										6.919		5.526	9.961	6.352
										8.004		7.758	8.394	6.831
										5.953		7.022	9.052	7.793
										7.649		6.014	8.085	8.32
										6.403		8.167	10.862	5.989
										5.784		6.377	9.265	6.307
										6.909		7.119	10.233	8.232
										6.417		7.437	8.47	7.772
										6.224		5.4	7.986	6.615
										6.66		5.259	10.092	8.731
										6.264		8.067	12.145	8.934
										7.375		6.014	7.111	7.076
										7.335		7.284	6.071	7.691
										6.4		5.537	11.137	7.957
										6.018		6.504	9.599	7.386
										6.449		6.259	10.39	8.92
										8.004		5.259	5.44	6.296
										6.619		7.496	8.222	6.781
										6.919		6.086	10.054	6.884
										6.42		5.834	7.845	6.253
										6.781		6.107	8.638	8.447
										7.142		6.259	6.837	7.386
										5.247		5.526	8.466	7.614
										8.004		6.178	8.489	7.54
										7.765		7.62	7.709	7.129
										6.14		5.715	9.616	7.562
										5.849		4.746	7.634	6.64
										4.923		5.888	5.578	8.04
										6.39		6.759	11.42	7.663
										8.053		6.721	6.517	6.863
										6.284		5.759	8.41	8.153
										7.02		6.024	9.649	6.912
										6.891		5.318	9.878	9.472
										6.269		5.102	7.929	7.316
										6.536		5.003	9.428	6.768
										7.027		7.293	7.142	5.732
										6.891		6.045	9.9	6.261
										7.305		8.167	9.192	8.135
										6.707		5.259	8.097	7.396
										7.122		6.95	8.708	7.008
										6.79		5.306	8.967	8.904
										6.422		4.612	9.757	6.64
										7.056		8.625	8.222	7.473
										6.351		8.251	10.114	7.408
										4.926		7.437	9.952	7.473
										6.388		6.731	8.44	9.063
										6.269		6.832	9.216	5
										6.466		6.504	9.122	9.095
										7.517		6.494	8.144	8.877
										6.417		5.223	8.485	8.179
										5.768		6.455	10.72	4.982
												6.377	6.237	7.212
												6.455	11.35	6.894
												6.832	9.948	7.199
												5.318	7.68	8.153
												6.977	8.36	7.17
												6.455	7.925	6.574
												7.637	9.823	8.512
												8.075	6.86	7.809
												7.496	7.779	7.212
												6.795	7.187	6.213
												6.955	8.085	10.802
												7.855	10.279	7.109
												6.014	8.085	10.102
												6.298	8.678	8.829
												9.286	8.069	6.886
												7.78	5.578	7.212
												6.934	8.025	6.33
												5.644	5.96	7.585
												6.907	6.818	6.985
												7.448	8.222	6.844
												7.888	7.986	7.099
												6.779	9.105	6.696
												7.13	6.897	8.146
												6.934	7.845	6.844
												5.985	7.222	7.504
												6.014	7.84	6.985
												6.254	8.601	7.442
												6.35	8.722	6.894
												6.735	8.44	7.386
												6.731	9.489	6.464
												7.077	9.398	6.531
												5.933	8.645	7.099
												6.834	7.865	8.706
												6.834	9.806	5.283
												3.863	9.108	6.522
												7.387	8.545	9.288
												8.872	7.68
												7.391	7.354
												5.967	8.571	8.646
												6.658	8.545	7.991
												4.436	7.668	7.991
												6.564	7.142	9.091
												6.045	10.307	7.372
												5.794	7.726	7.237
												5.157	10.082	9.355
												7.62	8.222	10.853
												6.509	11.364	9.355
												7.261	7.457	7.991
												8.388	6.551	7.237
												5.38	9.066	10.847
												6.191	7.857	6.615
												7.653	5.814	7.809
												5.38	6.002	6.108
												6.274	8.871	8.638
												6.63	8.708	9.107
												8.02	10.255	5.77
												6.759	8.152	9.642
												6.274	7.974	7.991
												5.775	6.724	6.701
												6.231	9.599	7.519
												5.54	7.974	7.237
												7.431	7.187	6.484
												5.89	7.845	7.377
												7.639	7.68	6.64
												5.985	8.428	5.944
												6.525	8.809	6.431
												6.523	6.428	7.454
												5.93	9.292	6.829
												6.724	8.689	6.296
												6.696	7.362	7.425
												7.531	6.313	7.957
												7.044	6.566	6.464
												6.35	7.147	6.204
												6.907	9.394	5.947
												6.88	7.779	5.337
												4.831	11.52	6.789
												6.045	10.307	6.829
												6.313	9.9	7.882
												7.329	9.616	6.531
												6.834	9.192	6.442
												7.306	9.192	5.333
												6.35	7.457	7.367
												5.509	8.59	9.093
												6.341	6.948	6.307
												6.079	8.719	7.367
												7.095	7.187	6.564
												6.919	8.578	8.447
												5.526	9.261	8.731
												4.629	7.111	6.789
												5.277	8.394	6.789
												6.231	7.779	6.693
												7.598	8.795	7.092
												5.202	7.222	7.786
												5.142	10.609	7.932
												6.281	9.052	5.682
												6.525	10.015	7.809
												6.968	8.085	7.129
												5.25	7.328	7.129
												6.955	8.722	6.108
												7.022	9.398	7.276
													8.795	7.492
													10.955	5.883
													9.192	7.048
													8.428	6.696
													9.178	6.367
													8.132	6.672
													9.394	6.615
													9.715	7.975
													9.105	6.574
													7.643	6.672
													8.337	5.883
													6.566	8.855
													6.585	8.216
													7.634	7.109
													5.714	7.289
													8.722	6.484
													8.394	7.903
													8.638	6.607
													9.995	6.626
													6.204	6.725
													7.454	9.739
													8.438	7.119
													3.904	7.099
													7.606	6.596
													8.011	7.377
													6.321	8.091
													8.751	6.912
													9.836	7.425
													9.122	6.821
													8.258	6.409
														5.417
														6.296
														7.276
														7.408
														9.242
														8.59
														5.622
														7.01
														8.556
														7.355
														7.512
														8.153
														7.311
														8.307
														6.596
														7.884
														6.768
														6.146
														7.691
														8.361
														8.251
														6.985
														6.352
														6.019
														6.607
														7.038
														8.786
														7.461
														6.829
														7.237
														7.237
														6.717
														6.696
														7.848
														7.377
														8.588
														8.361
														7.606
														7.018
														7.308
														7.975
														7.031
														7.512
														7.252
														6.607
														7.993
														7.311
														7.95
														6.701
														8.413
														6.894
														6.307
														8.41
														5.883
														5.98
														7.728
														6.35
														6.509
														7.197
														6.114
														7.635
														8.385
														7.848
														6.531
														8.387
														7.028
														8.179
														5.71
														7.83
														6.626
														8.17
														6.712
														6.367
														8.038
														5.929
														6.776
														6.574
														5.505
														6.948
														5.201
														7.712
														8.258
														6.701
														7.099
														5.834
														6.725
														6.717
														7.966
														7.464
														6.364
														7.597
														7.159
														7.048
														8.457
														7.046
														5.262
														7.386
														5.929
														6.509
														8.835
														7.71
														7.212
														9.472
														9.799
														10.615
														8.464
														8.675
														8.035
														7.289
														9.93
														9.164
														7.993
														10.243
														9.409
														7.377
														6.969
														8.982
														7.661
														6.566
														9.676
														7.119
														7.129
														9.75
														9.939
														8.745
														6.821
														6.985
														9.107
														6.574
														7.737
														8.916
														6.367
														7.129
														8.153
														8.035
														8.588
														9.403
														9.843
														7.316
														7.661
														7.614
														7.076
														6.912
														8.588
														10.199
														6.987
														6.985
														9.75
														8.199
														9.03
														8.904
														9.827
														8.615
														6.653
														9.777
														9.148
														7.728
														8.026
														7.878
														8.724
														7.914
														8.179
														9.111
														8.916
														8.058
														7.316
														7.543
														7.046
														9.344
														9.251
														6.473
														8.41
														7.802
														8.877
														8.342
														11.116
														9.378
														9.601
														7.772
														7.367
														8.877
														9.823
														7.199
														9.509
														8.565
														8.316
														8.303
														9.122
														7.93
														6.367
														8.223
														10.929
														8.689
														6.865
														9.511
														8.984
														5.947
														9.224
														9.317
														7.67
														7.308
														7.823
														8.512
														6.539
														8.447
														8.489
														7.028
														6.696
														7.071
														8.673
														8.17
														10.199
														5.989
														8.258
														7.367
														7.774
														8.146
														8.812
														9.799
														9.492
														8.106
														7.237
														9.657
														9.095
														7.765
														8.179
														8.153
														8.812
														7.018
														7.606
														7.386
														7.957
														5.92
														7.159
														7.119
														7.028
														9.878
														8.389
														9.288
														8.556
														7.712
														6.473
														8.098
														7.259
														8.829
														8.974
														10.437
														8.342
														7.912
														7.071
														7.912
														8.91
														7.562
														8.731
														8.091
														8.327
														8.625
														8.216
														7.425
														7.396
														7.109
														7.377
														8.839
														6.701
														7.396
														7.377
														7.964
														6.863
														8.745
														5.544
														7.83
														7.092
														7.691
														10.243
														7.809
														7.543
														6.831
														8.038
														7.512
														8.656
														7.008
														9.063
														8.575
														9.91
														9.265
														8.41
														8.205
														8.223
														6.273
														8.638
														7.207
														7.635
														8.216
														5.989
														9.5
														7.139
														7.737
														12.398
														6.04
														5.682
														6.818
														9.101
														7.774
														9.154
														8.934
														6.969
														8.135
														7.848
														7.54
														6.946
														7.809
														7.767
														8.098
														7.644
														6.8
														7.389
														8.316
														10.199
														7.464
														8.575
														7.187
														9.162
														8.855
														6.304
														6.389
														7.635
														7.199
														8.284
														9.036
														7.841
														8.316
														7.625
														6.574
														6.863
														7.092
														7.099
														8.303
														8.731
														7.884
														7.914
														6.016
														6.672
														5.899
														8.32
														7.691
														5.238
														6.969
														7.991
														8.058
														6.352
														5.266
														7.369
														5.834
														8.675
														6.744
														7.71
														9.045
														10.757
														7.774
														8.904
														7.8
														7.58
														7.712
														7.991
														9.532
														6.451
														8.588
														8.179
														6.12
														9.099
														7.092
														8.438
														9.169
														5.609
														7.857
														6.307
														6.76
														9.327
														9.601
														8.197
														7.993
														7.957
														9.914
														6.64
														8.316
														6.409
														9.426
														8.875
														8.47
														8.835
														7.447
														7.408
														10.986
														5.698
														6.531
														7.966
														10.504
														7.276
														10.525
														8.135
														7.046
														7.95
														8.164
														6.409
														5.054
														8.745
														6.253
														7.031
														6.542
														7.129
														7.117
														8.035
														6.028
														9.099
														7.01
														7.119
														9.247
														7.028
														7.159
														6.12
														6.247
														9.657
														8.273
														8.106
														7.147
														8.646
														9.216
														5.989
														6.818
														6.166
														6.744
														8.385
														7.237
														8.638
