# Supplementary material for: Lifelong regeneration of cerebellar Purkinje cells after induced cell ablation in zebrafish
Source: eLife. 2023 Apr 12;12:e79672. doi: 10.7554/eLife.79672 (PMC10147380; doi:10.7554/eLife.79672)
Supplement: Figure 7—source data 1. [file elife-79672-fig7-data1.xlsx]

## Sheet: Hoja2
		Figure 7A, B	number and % of PCs		(Endox=PC-ablated, DMSO=control)				Figure 7C	% PCs/areas corpus cerebelli									Figure 7D	diameter PC soma 2wpt						Figure 7D	diameter PC soma 4mpt						Figure 7D	diameter PC soma 1ypt						Figure 7E	% PCs type-I 2wpt							Figure 7G	% time bottom zone (novel tank test)
		Endox-2wpt	DMSO-2wpt	Endox-4mpt	DMSO-4mpt	Endox-1ypt	DMSO-1ypt		Endox-13dpt	area-1	area-2	area-3		DMSO-14dpt	area-1	area-2	area-3		area-1 End	area-1 DMSO	area-2 End	area-2 DMSO	area-3 End	area-3 DMSO		area-1 End	area-1 DMSO	area-2 End	area-2 DMSO	area-3 End	area-3 DMSO		area-1 End	area-1 DMSO	area-2 End	area-2 DMSO	area-3 End	area-3 DMSO		area-1 Endox	area-1 DMSO	area-2 Endox	area-2 DMSO	area-3 Endox	area-3 DMSO			Endox 12-14dpt	DMSO 12-14dpt
		286	2219	436	2115	802	2406			11.3208	59.7484	28.9308			32.1855	39.1185	28.696		10.668	14.33	8.303	12.72	13.396	10.298		11.496	11.18	9.143	11.533	12.031	14.012		13.418	14.209	17.222	14.783	15.154	14.088		83.3333	54.7789	61.2613	21.9484	61.1765	45.92		trial#1	87.3962	79.383
		226	2615	749	2273	766	2880			6.17978	50	43.8202			28.7811	45.1512	26.0676		10.628	10.707	9.373	13.184	12.325	11.382		10.317	10.159	11.04	9.828	17.115	11.755		10.848	14.25	14.848	11.363	13.397	11.581		85.7143	65.8423	76.5766	34.5813	73.1707	54.9488			71.9929	84.4278
		113	2966	527	2535	853	2305			15.9292	55.7522	28.3186			27.7976	43.5139	28.6885		10.229	9.577	11.413	6.824	12.77	12.19		11.833	10.761	12.902	9.995	11.397	11.881		8.716	11.832	15.978	9.117	20.668	12.22		77.7778	59.7436	63.4921	23.751	50	46.7081			87.7644	90.7835
		229	2732	908	2816	781	2943			3.5	55.5	41			31.0448	39.7015	29.2537		11.004	11.494	9.366	11.024	14.39	11.056		11.953	11.791	10.903	9.703	17.958	10.002		13.072	12.697	6.826	14.932	11.664	8.048		72.7273	69.0934	68.5393	38.4533	57.6923	56.9971			91.1849	56.7068
		213	2357	699	2297	726	2509			5.76923	53.3654	40.8654			29.8595	39.1686	30.9719		9.351	12.725	9.495	10.667	12.725	7.112		13.375	9.77	11.809	7.666	14.591	12.361		13.546	12.078	5.628	10.714	11.694	11.887		94.4444	33.9216	56.8421	15.6951	65.2174	30.6238			94.3313
																			13.962	11.159	8.021	9.155	11.857	10.158		13.165	14.629	13.697	8.508	17.181	17.016		13.055	11.024	7.351	14.39	13.055	15.028										99.0194
									Endox-4mpt	6.25	59.5109	34.2391		DMSO-4mpt	28.5072	38.5422	32.9506		13.96	13.591	9.637	10.714	13.724	11.004		12.701	11.881	10.811	10.06	16.232	15.332		21.231	13.037	10.103	8.092	12.772	9.242										98.9147
										9.50872	59.271	31.2203			27.2328	40.9956	31.7716		12.585	13.717	10.767	9.577	10.396	9.958		17.056	11.357	12.791	12.331	9.458	7.204		15.41	12.325	7.951	11.85	11.583	9.871		Figure 7E	% PCs type-I 4mpt							67.4086
										5.80357	52.2321	41.9643			29.5899	38.2572	32.1528		11.957	10.66	11.459	12.601	10.628	6.513		9.806	10.628	10.988	10.821	12.565	9.937		11.539	12.452	12.699	12.137	14.615	10.606		area-1 Endox	area-1 DMSO	area-2 Endox	area-2 DMSO	area-3 Endox	area-3 DMSO			87.296
										13.1707	57.8049	29.0244			26.5174	38.1261	35.3565		11.358	11.971	8.172	7.656	10.721	6.697		17.77	12.5	13.273	10.775	11.869	13.142		16.071	10.193	11.459	13.271	13.039	10.415		80	80.7796	41.7112	59.375	54.8223	73.0726			90.2769
										11.2291	62.0637	26.7071			32.4393	30.0101	37.5506		12.608	7.986	12.533	8.632	16.813	5.678		18.351	11.171	11.645	12.12	14.189	11.025		13.185	12.096	14.05	12.231	11.006	14.464		88.4615	83.3071	76.4957	48.9647	86.7021	67.1014			99.062
																			6.826	12.031	11.084	11.178	8.805	10.415		17.633	8.72	11.346	7.619	12.707	10.927		16.918	12.4	15.163	12.606	17.6	11.21		77.7778	80.2222	61.8143	47.7589	66.8067	64.8333
									Endox-1ypt	7.06767	57.594	35.3383		DMSO-1ypt	28.611	34.5178	36.8713			11.581	6.857	8.91	9.465	8.101		13.65	11.775	13.273	8.839	13.407	14.731		13.336	12.725	10.396	13.717	13.273	11.133		94.5946	83.0123	58.9242	42.0984	64.2045	56.2121
										14.6535	58.4158	26.9307			26.0391	35.353	38.6079			10.76	10.921	13.222	9.311	9.28		13.142	11.027	10.645	9.117	18.476	8.19		12.772	8.465	13.782	10.599	11.212	11.363		91.3043	69.4228	68.9498	35.7504	63.4921	49.5957
										16.5794	59.6859	23.7347			27.2888	35.7354	36.9758		12.487	10.001	13.039	10.518	7.458	9.148		8.022	9.843	10.171	8.466	13.863	11.358		12.221	12.208	15.578	11.363	10.98	11.513									trial#2	91.5817	72.0668
										11.7264	58.3062	29.9674			36.38	34.1551	29.4648		8.837	8.649	10.709	9.651	10.194	11.134		11.686	10.363	10.831	9.212	15.772	10.842		13.07	14.975	12.286	9.85	8.407	13.965										88.4142	68.305
										7.73196	54.3814	37.8866			25.7781	35.724	38.498		12.233	10.984	11.187	8.74	10.024	9.365		10.986	12.003	10.143	8.19	15.162	8.466		12.515	9.494	13.963	8.998	8.304	11.004		Figure 7E	% PCs type-I 1ypt							85.202	75.0719
																			11.237	12.078	9.909	10.774	8.806	10.774		13.142	11.677	13.122	11.038	17.244	7.232		14.417	7.804	18.74	9.464	10.472	12.137		area-1 Endox	area-1 DMSO	area-2 Endox	area-2 DMSO	area-3 Endox	area-3 DMSO			99.9558	79.3396
																			13.544	9.842	9.829	10.08	9.909	10.339		18.213	9.512	12.48	9.117	17.14	10.499		15.33	7.795	16.072	11.037	11.135	14.489		93.3333	83.3058	70.1422	60.5634	71.4286	68.5714			99.8339	85.8546
																			14.136	11.513	14.029	9.871	12.602	8.632		17.172	7.874	11.54	11.384	13.55	13.649		11.514	9.871	11.792	8.641	10.52	9.936		79.1667	81.8182	40.7821	55.8678	78.8043	64.2173			90.893	93.2483
																			10.194	12.12	10.628	9.828	9.465	6.535		15.229	11.446	14.488	8.998	19.204	7.233		16.728	14.144	5.986	11.242	13.077	12.452		93.6842	82.1154	82.4561	65.864	80.8824	72.6329			93.0411	57.4696
																				12.4	13.651	8.596	11.39	14.144		15.206	11.769	12.858	8.508	9.389	12.326		13.512	10.158	13.719	11.952	11.384	10.84		97.2973	79.3548	86.1017	48.6631	86.7647	61.0763			95.4716	76.0518
																				8.715	12.122	9.486	12.856	11.037		15.073	7.986	12.19	9.703	9.622	9.095		10.341	11.363	15.22	11.953	9.653	13.929		97.8723	84.252	96.2457	69.697	73.1915	73.8137			91.7072	84.6604
																			12.699	9.372	13.445	8.507	11.006	12.208			11.11	10.988	10.193	13.66	12.137		17.402	10.66	9.996	11.457	11.346	9.994										99.9779
																			12.314	8.337	9.496	8.837	13.482	12.19			9.452	20.236	10.688	11.839	12.608		15.761	8.101	10.561	11.557	14.467	9.871
																			14.629	11.344	13.921	9.164	12.878	11.363			9.231	15.256	9.873	10.651	11.852		13.528	10.332	11.39	9.82	10.299	8.707
																			11.025	8.362	8.032	9.703	11.459	14.841		17.469	10.168	9.718	7.58	10.065	8.269		15.151	15.745	10.527	9.636	13.251	10.84
																			16.119	10.158	9.675	8.715	14.766	11.557		14.189	10.146	14.591	9.211	12.52	11.887		12.048	10.76	10.775	9.936	4.233	9.871
																			9.118	12.809	14.509	8.707	10.709	11.037		18.459	11.751	11.346	9.373	10.824	9.908		14.083	10.606	17.054	12.36	14.055	9.908
																			9.465	9.117	7.233	11.826	9.366	9.651		12.517	11.038	13.986	8.508	9.143	9.697		11.185	10.599	12.54	11.185	11.515	13.378
																			8.141	14.27	7.143	10.707	8.508	9.769		15.453	10.118	10.157	8.128	11.645	12.871		15.59	16.061	15.163	12.584	12.586	9.494
																			12.706	11.388	8.633	8.101	8.634	9.842		17.3	11.185	13.407	11.024	7.532	8.406		13.717	12.325	8.716	8.74	15.541	10.76									trial#3	78.0695	35.725
																			9.481	9.486	10.606	9.242	9.96	9.577		14.725	8.641	13.524	10.847	8.727	8.716		13.427	11.236	8.634	11.662	15.218	10.249										96.5432	54.3358
																			11.363	7.35	9.496	7.35	10.669	12.959		11.686	14.136	13.863	7.619	9.143	8.83		17.646	8.362	13.677	5.38	15.414	11.185										88.8345	50.1744
																			12.699	11.363	11.437	9.871	9.822	13.883		18.461	12.772	15.35	10.249	8.628	11.005		15.26	11.14	15.002	14.763	12.602	11.971										80.6677	70.5537
																			13.245	9.35	12.314	7.804	7.805	7.904		13.961	8.716	15.049	9.373	10.903	9.465		14.047	9.651	10.527	10.228	16.646	12.377										50.9976	53.0578
																			14.807	8.837	11.365	10.228	7.805	11.686		14.875	8.021	14.394	9.733	13.316	9.578		14.365	12.025	11.365	13.591	13.445	9.584										60.7214	52.7693
																			10.187	10.707	10.08	10.606	8.049	15.534		19.425	6.74	16.042	7.986	12.752	12.454		12.809	11.692	10.98	7.272	11.973	10.193										75.9723	12.4103
																			11.365	9.937	9.703	6.824	7.987	11.851		14.784	8.268	17.454	10.444	9.857	7.823		17.952	15.26	12.074	10.47	10.194	11.242										17.1544
																			12.54	9.471	9.994	7.804	8.049	13.779		16.661	9.829	16.858	11.589	7.271	6.815		12.4	12.114	9.374	12.532	13.395	11.133
																			15.609	12.208	10.607	7.959	10.98	6.435		17.24	11.057	13.986	11.185	7.222	8.65		12.096	10.101	11.212	9.936	11.256	10.76
																				7.457	9.674	9.372	11.038	10.332		12.699	10.395	12.031	12.877	8.62	13.224		13.543	11.444	12.333	6.908	11.257	10.66
																				9.486	8.935	10.158	8.741	8.465		12.192	10.628	15.424	8.329	12.173	7.796		20.152	10.395	10.775	16.069	9.118	9.828
																			14.568	13.249	8.362	10.332	9.087	7.609		16.698	5.512	14.249	9.77	11.371	10.285		18.095	10.498	11.834	15.608	15.073	10.687
																			8.998	8.172	7.665	8.715	10.842	14.725		14.009	9.488	15.129	8.032	7.222	10.98		12.607	11.581	13.224	14.744	13.224	10.284
																			10.545	11.832	8.716	9.211	12.878	9.532		13.883	10.417	15.585	7.042	11.833	10.547		14.784	8.715	12.222	15.447	14.877	10.415
																			11.459	9.651	9.96	9.35	10.709	8.337		12.854	10.285	10.811	8.863	10.283	9.873		13.126	10.332	10.417	12.809	12.221	8.91
																			11.384	13.026	12.374	8.934	10.608	13.96		14.999	8.975	13.55	7.572	9.857	9.13			11.037	10.445	5.985	12.878	8.974
																			7.987	11.363	7.805	9.311	9.28	8.74		17.858	13.9	15.256	5.513	8.036	11.142			12.854	18.082	12.691	14.392	14.819
																			12.073	11.024	11.495	10.101	8.465	13.649		17.798	11.972	10.751	10.194	8.116	11.39			15.236	13.714	8.74	13.409	10.657
																			10.92	11.881	13.25	10.525	9.653	15.686		11.663	13.418	10.591	4.744	11.669	10.249		16.728	12.36	11.889	12.691	15.746	8.715
																			9.164	11.037	9.851	8.707	10.761	11.612		12.317	14.23	12.12	7.072	11.645	12.192		13.677	15.218	13.514	13.124	12.208	9.313
																			11.179	8.934	11.459	8.582	7.35	13.427		15.374	12.861	9.197	9.117	9.987	9.908		17.108	12.544	12.517	11.255	11.775	11.767
																			10.927	6.446	10.828	8.311	14.843	9.117		17.34	10.525	13.759	6.469	12.497	9.117		18.795	19.949	15.906	14.875	14.517	11.092
																				9.673	11.363	10.72	9.937	9.673		12.025	11.761	15.722	6.105	9.197	5.878		13.714	10.774	10.547	12.72	11.603	11.271
																				11.134	10.848	9.733	10.708	10.298		18.903	13.677	14.394	11.256	8.702	6.708		17.958	12.4	11.058	11.759	15.45	18.204
																			10.194	9.486	8.642	8.337	9.03	11.134		11.693	12.073	13.273	10.98	7.947	7.143		13.418	10.606	9.675	9.242	11.201	13.779
																			13.545	9.101	9.533	9.769	6.709	11.14		15.077	13.038	12.468	7.233	8.494	10.186		14.978	12.854	13.17	8.092	11.603	14.509
																			13.764	12.167	9.909	10.76	12.233	13.026		13.528	12.923	12.701	10.024	14.601	10.92		16.606	12.697	21.478	17.014	10.344	13.734
																			12.192	9.82	13.077	8.649	11.59	14.489		14.544	13.244	12.382	10.251	13.359	15.924		18.52	8.048	8.839	13.717	10.059	13.065
																			14.565	7.893	11.038	12.096	15.244	8.837		14.846	12.327	12.633	8.999	10.691	13.07		16.81	9.85	7.666	13.675	13.718	19.678
																			13.717	10.707	12.315	9.117	9.351	17.63		15.759	14.39	9.806	7.618	8.591	9.842		15.917	11.185	10.842	13.543	9.733	10.881
																			16.256	11.004	9.873	7.072	8.129	12.848		13.337	11.761	14.742	11.539	8.284	10.334		20.375	12.031	13.482	13.184	10.518	13.229
																			12.402	11.134	11.006	6.908	14.407	11.178		16.174	8.998	15.092	10.08	10.277	7.878		14.209	13.053	11.084	12.208	10.601	11.971
																			12.86	6.949	15.262	6.622	14.703	13.96		16.764	10.417	6.687	10.84	10.16	11.243		15.442	13.416	14.703	11.881	10.981	13.098
																			10.194	6.98	13.338	7.192	14.495	15.236		11.459	11.663	14.443	6.301	13.778	8.406		14.783	15.917	9.488	12.231	13.839	10.626
																			10.662	9.871	7.043	10.332	8.583	10.707		12.872	11.212	7.446	11.388	7.439	10.002		17.302	12.725	11.357	13.119	8.219	14.068
																			10.927	11.457	13.572	9.117	10.662	12.937		11.243	17.336	8.29	6.447	7.426	8.634		13.335	17.856	8.998	14.627	8.502	14.285
																			9.118	10.298	12.534	9.242	13.782	11.236		13.899	10.395	6.234	8.501	10.017	11.179		9.732	12.417	13.655	12.921	9.949	16.172
																			12.169	11.082	12.488	10.298	11.791	10.193		15.754	10.002	9.563	7.721	9.452	8.839		9.703	11.532	12.208	12.959	8.518	13.244
																			11.135	8.507	9.909	12.208	8.974	12.284		13.68	10.519	12.93	13.336	10.651	8.911		21.66	18.174	17.858	11.185	8.551	15.372
																			12.419	10.707	14.232	8.805	14.914	14.937		17.119	9.653	8.921	13.125	9.003	11.973		16.383	11.741	11.973	11.79	12.363	11.778
																			12.584	10.707	10.472	9.117	10.761	12.532		12.486	11.169	12.19	9.651	11.773	9.533		16.435	8.465	9.652	13.57	7.763	13.222
																			15.904	9.842	10.608	8.974	14.082	13.919		14.285	10.48	10.988	7.543	8.041	11.459		12.584	15.649	17.432	10.193	8.466	9.584
																				11.971	8.864	9.148	10.761	13.512		6.611	14.323	13.235	9.884	11.75	9.85		19.347	13.335	12.419	7.282	9.611	11.082
																				11.082	13.963	11.255	13.818	18.174			12.293	8.16	9.465	6.814	10.193		15.525	15.594	15.92	7.804	11.436	11.778
																				12.635	13.677	8.74	11.755	16.069			11.662	10.824	9.85	8.82	10.249		15.976	8.632	11.889	10.76	7.438	15.465
																				9.211	11.852	8.862	10.547	13.717			16.097	12.031	6.469	7.094	10.707		13.384	12.208	17.616	9.464	10.223	13.48
																				10.395	12.327	9.871	7.283	9.651		15.128	13.208	11.34	7.951	10.601	10.9		17.565	9.936	12.137	12.725	6.436	12.809
																				7.142	12.169	8.632	13.185	9.311		14.702	13.026	9.351	11.588	11.379	7.805		14.39	8.189	10.417	11.735	8.466	11.832
																				8.998	11.761	10.415	9.873	11.851		9.344	14.175	10.143	9.164	6.171	9.586		13.271	15.33	9.909	8.337	14.008	7.795
																				14.251	9.243	9.769	5.46	19.439		13.591	14.211	10.143	7.619	13.655	8.044		13.222	13.649	11.363	14.27	16.066	11.004
																				11.834	13.208	8.829	10.101	12.096		17.305	15.467	8.628	6.773	11.571	8.83		16.453	10.687	13.009	13.628	11.761	5.985
																				11.612	12.327	7.272	12.169	8.101		19.343	12.811	10.509	6.436	14.468	10.827		15.26	7.041	5.766	10.984	14.785	10.626
																				9.995	9.118	8.507	13.719	12.325		18.062	14.392	7.598	7.272	10.988	11.006		21.838	11.662	11.186	11.024	9.218	14.768
																				10.187	12.873	7.58		11.057		16.494	12.326	9.143	8.508	13.364	9.212		14.464	11.953	9.311	6.446	12.285	9.936
																				12.221	16.063	7.721		9.366		18.764	12.331	7.427	8.716	15.181	12.12		16.383	11.082	13.53	12.691	14.544	12.36
																				10.186	14.727	7.142	9.652	8.303		13.718	8.935	7.947	9.156	12.514	9.873		15.532	12.921	6.448	11.024	11.19	8.337
																				9.96	14.009	9.464	12.127	8.715		13.654	10.986	11.565	8.031	9.242	8.364		16.604	12.691	3.786	10.001	11.688	12.137
																				11.743	15.314	8.405	11.854	7.233		13.062	10.628	12.342	7.143	10.193	10.221		15.89	15.26	9.488	11.686	10.284	8.974
																				13.12	10.194	9.403	15.073	6.536		13.04	13.294	13.94	8.031	11.459	10.707		15.372	8.189	9.118	11.753	7.312	8.74
																				15.22	13.719	8.189	9.149	8.863		16.303	13.294	8.857	9.577	13.142	7.204		14.489	12.532	13.649	12.025	9.243	8.337
																				9.96	9.697	11.778	10.715	12.534		12.505	8.83	9.103	7.721	11.741	10.56		15.562	12.325	13.338	11.692	6.209	10.298
																				10.92	11.755	8.101	13.719	6.981		14.464	11.037	8.553	9.494	7.96	13.719		14.494	10.847	14.745	14.189	10.926	11.082
																				7.665	10.707	7.986	12.921	6.772		12.261	11.539	10.213	5.914	10.708	8.998		14.846	7.182	16.071	13.037	15.608	12.72
																				15.317	6.825	9.164	12.725	9.351		13.481	14.465	9.103	7.113	10.002	14.565		12.584	8.582	11.005	10.899	7.544	12.167
																				14.136	7.351	8.189	13.961	11.18		16.675	10.92	11.04	9.28	10.396	9.117		16.63	10.193	13.011	11.881	15.147	11.382
																				10.334	11.533	7.986	8.542	6.95		10.841	11.457	10.691	10.396	13.635	12.876		15.976	22.357	11.135	6.104	10.444	12.4
																				11.006	12.811	7.58	11.761	7.194		16.593	14.49	11.04	10.518	10.193	11.532		28.772	12.331	9.496	12.893	7.233	11.037
																				9.533	11.614	8.934	11.532	10.159		9.118	13.294	12.102	10.607	8.093	12.326		10.25	13.528	11.294	17.219	8.094	13.037
																				8.839	11.663	8.337	11.558	5.3		12.861	14.391	6.153	8.604	15.673	17.432		18.676	12.544	6.74	14.975	11.514	11.753
																				10.251	12.36	7.571	13.649	9.243		13.143	12.191	8.824	9.102	9.149	11.515		18.843	14.405	15.893	14.841	8.364	9.372
																				9.118	9.555	7.986	11.237	9.212		17.371	12.032	9.622	8.806	10.223	11.363		12.699	11.356	13.967	13.512	10.841	10.919
																				9.157	5.986	8.048	8.633	9.095		12.539	11.257	9.197	8.337	7.61	11.446		19.56	10.76	14.049	12.231	17.271	8.302
																				8.716	10.334	10.443	10.526	9.844		15.296	8.022	9.351	8.83	9.495	10.828		16.538	10.498	11.827	15.26	10.396	8.78
																				13.38	12.209	5.766	12.653	7.184		13.655	10.519	7.598	10.979	10.762	9.495		10.472	13.543	10.193	11.242	18.329	9.218
																				10.92	13.885	7.495	12.454	7.796		14.084	13.077	11.736	10.002	12.922	10.472		13.885	6.18	14.846	11.236	14.09	11.832
																				9.085	8.633	8.03	13.12	10.299		13.481	8.583	14.229	11.294	12.36	8.863		25.736	15.745	10.341	12.498	9.871	12.584
																				11.057	7.571	10.395	11.761	8.154		10.396	12.637	11.521	7.543	7.96	12.586		18.488	14.052	8.569	12.652	10.607	14.975
																				10.926	11.025	8.405	12.073	8.839		10.761	10.521	18.148	8.975	12.585	11.446		16.285	13.888	9.843	10.899	9.404	10.228
																				10.023	10.081	8.934	12.95	9.844		8.155	9.157	13.203	8.338	11.973	11.791		12.192	8.805	9.373	10.707	6.772	8.337
																				11.255		7.35	11.358	8.566		11.39	11.39	16.606	8.83	7.544	8.406		14.491	16.557	8.303	10.606	15.816	7.877
																				12.856		8.101	11.515	8.154		11.257	8.406	9.828	9.366	13.555	9.404		30.173	11.753	12.849	8.465	13.781	15.917
																				14.899	14.49	8.302	12.727	9.494		11.662	11.237	10.086	9.101	15.029	8.407		15.851	13.07	10.444	16.083	17.431	9.242
																				10.92	12.921	7.282	13.764	8.406		13.027	14.225	11.565	8.19	12.584	11.955		14.189	12.871	13.781	11.513	15.073	15.672
																				11.533	11.134	6.243	11.364	10.607		16.174	12.361	9.57	7.959	9.494	8.716		17.45	11.881	12.263	9.842	15.673	12.313
																				14.008	14.385	7.904	12.192	8.364		10.979	12.585	8.393	9.652	12.12	6.857		18.519	9.696	9.923	12.544	9.148	11.382
																				13.12	10.229	8.91	14.054	11.256		10.709	10.842	12.616	4.559	11.237	5.779		19.38	12.025	12.585	10.158	12.699	13.07
																				10.545	9.555	8.837	13.816	9.093		10.299	11.084	9.518	10.333	8.863	10.547		19.023	14.607	14.287	11.79	16.453	9.486
																				10.002	9.28	8.154	14.509	8.338		12.419	12.534	11.742	13.883	7.113	8.406		17.831	12.492	12.693	8.54	14.136	12.031
																				13.816	8.998	9.471	8.839	10.92		9.995	11.858	9.45	4.621	7.233	9.031		12.856	8.715	6.857	10.66	20.291	11.004
																				10.662	9.117	9.733	11.741	8.129		10.471	11.515	7.71	10.229	11.539	10.559		12.895	10.626	11.779	14.913	9.872	11.004
																				12.727	20.191	7.543	11.495	8.173		17.375	10.299	8.62	10.187	8.049	9.465		14.565	15.521	15.411	8.337	16.631	11.857
																				11.004	13.863	7.804	8.329	9.675		16.772	9.675	9.54	11.237	17.441	9.157		12.872	12.921	13.12	11.513	16.284	11.255
																				9.148	13.293	8.465	7.571	6.981		16.106	14.332	11.22	10.848	9.938	8.716			13.57	15.152	11.735	12.878	12.325
																				15.977	9.465	8.805	14.622	9.651		12.34	7.572	14.169	12.36	12.333	9.651			14.932	15.314	13.037	11.741	16.379
																				9.095	6.825	9.673	10.84	8.268		14.495	10.709	12.307	10.229		9.822		17.105	12.515	11.972	10.66	15.444	14.144
																				9.822	7.986	10.395	11.004	9.494		12.285	11.558	12.334	11.761		7.906		7.311	13.378	13.011	9.471	13.883	9.156
																				7.805	11.363	8.837	8.716	9.218		14.008	9.555	14.703	9.873		11.693		8.716	10.518	10.499	11.056	9.211	10.186
																				5.877	10.332	6.469	10.707	7.986		15.077	8.838	9.205	9.312	16.385	8.19		18.934	10.001	13.428	13.591	7.987	11.356
																				6.772	11.211	8.829	11.583	10.229		15.467	12.326	15.512	12.209	13.396	9.093		13.055	6.518	12.95	10.058	7.233	14.725
																				12.121	11.832	9.494	11.761	11.006		16.868	12.494	14.891	10.471	12.169	11.514		14.272	11.21	13.053	12.871	12.377	11.832
																				12.811	10.395	9.471	14.842	8.83		10.396	12.21	13.396	10.707	11.358	9.093		14.134	12.284	12.026	9.554	15.636	12.114
																				8.634	11.754	9.842	12.478	11.533		17.958	10.92	12.102	9.351	12.121	9.471		12.221	11.388	7.572	10.298	15.564	9.871
																				9.28	9.703	9.651	13.336	9.102		14.511	11.037	11.04	10.341	10.499	9.584		14.534	12.22	20.164	14.047	7.795	12.313
																				9.118	12.025	8.837	11.347	7.515		18.272	12.772	6.898	11.211	15.565	9.282		18.275	14.568	12.192	10.415	5.691	13.717
																				9.843	9.093	7.904	11.014	12.12		11.345	12.77	9.689	12.691	12.191	7.951		15.942	11.612	8.338	9.958	8.154	8.74
																				9.218	12.36	9.958	11.927	9.157		12.139	14.311	12.202	12.607	14.877	12.697		16.438	14.975	10.249	14.225	10.193	8.38
																				10.285	10.707	9.486	7.113	9.031		19.055	13.026	6.336	11.037	13.677	10.525		13.759	16.63	14.745	10.172	8.54	11.293
																				8.634	10.395	6.611	11.852	11.792		12.121	9.652	13.141	9.404	9.948	9.555		18.965	14.174	25.071	6.116	11.356	8.189
																				7.073	13.816	9.09	8.684	8.032		15.578	11.345	14.136	11.212	8.716	12.191		20.291	17.119	19.066	12.36	12.854	12.584
																				11.212	10.526	8.67	8.211	9.465		16.38	13.245	13.386	9.157	8.476	12.607		14.029	14.33	14.146	12.208	12.36	11.741
																				8.508	12.355	8.834	10.609	12.111		17.036	9.844	14.365	10.09	9.293	9.652		12.872	12.77	16.494	10.395	11.832	11.293
																				8.466	9.243	8.329	13.973	12.361		14.842	10.299	17.433	10.471	6.647	7.572		19.235	15.521	14.842	10.395	12.377	13.675
																				11.557	11.388	7.543	10.721	8.303		14.842	12.192	16.309	12.326	9.558	7.804		15.89	10.84	16.594	7.232	13.141	10.978
																				11.614	13.649	8.899	8.808	9.577		14.509	12.263	13.053	11.18	7.575	9.404		19.274	13.919	12.585	9.494	9.532	13.292
																				8.093	11.024	9.556	8.701	12.325		11.539	12.454	15.973	11.581	7.351	14.251		15.073	13.124	13.962	8.862	9.365	10.395
																				8.303	4.164	7.782	13.599	11.363		14.007	10.828	9.697	7.467	11.109	12.923		14.991	14.725	12.811	11.662	13.314	8.87
																				8.407	13.338	8.838	7.467	9.156		12.544	14.417	13.223	10.92	8.219	14.842		14.877	12.492	12.098	7.904	11.255	12.231
																				9.149	10.334	12.034	9.324	10.299		11.581	12.584	12.169	6.856	12.303	7.351		15.262	14.489	14.144	11.14	11.581	13.244
																				7.619	12.584	9.96	12.874	13.009		12.498	13.428	9.937	12.12	11.265	9.994		9.908	9.908	19.98	9.486	14.31	8.507
																				12.499	13.009	8.904	8.142	8.362		13.68	12.263	9.164	8.302	12.876	13.921		19.98	13.053	11.256	8.362	13.271	9.148
																				6.981	12.137	11.136	7.58	10.518			12.721	7.457	8.507	16.703	9.22		17.417	14.568	19.023	9.156	13.075	7.202
																				8.634	10.707	7.788	11.441	10.396			12.693	12.192	8.871	12.601	8.83		19.685	8.337	14.727	8.715	10.827	13.899
																				11.365	14.365	7.722	12.032	9.117			13.316	15.779	10.545	11.39	10.66		20.037	10.984	14.226	7.804	11.753	18.312
																				9.118	6.163	8.518	11.346	10.471		11.134	10.608	9.494	9.404	11.779	8.303		18.488	9.148	14.226	11.388	13.96	10.919
																				9.488	13.651	6.448	11.623	5.692		12.602	8.83	13.294	8.806	8.808	9.365		16.297	8.128	13.141	11.185	14.027	13.222
																				13.208	9.842	7.782	8.993	10.519		14.919	13.12	8.999	11.082	12.795	16.455		16.594	9.85	17.166	12.948	15.085	10.395
																				8.362	11.459	8.521	12.08	10.299		12.326	8.049	11.179	9.637	12.685	15.071		19.133	10.707	11.357	10.518	13.717	14.622
																				8.863	13.718	7.953	10.979	9.844		11.345	10.229	11.588	10.229	8.175	11.76		19.543	15.33	16.734	10.606	10.518	12.4
																				11.759	12.4	7.707	12.974	10.761		10.848	11.588	9.118	9.555	8.715	9.995		14.701	12.4	10.172	13.378	10.193	14.607
																				5.051	14.432	8.815	11.015	10.715		10.23	9.117	7.722	9.958	11.117	11.073		17.857	12.03	16.258	7.232	12.584	12.19
																				11.741	10.444	9.35	9.851	13.571		9.031	10.229	10.56	10.194	9.872	12.21		13.379	12.096	10.662	8.829	9.554	12.072
																				9.995	12.602	9.431	10.92	12.871		9.873	9.211	15.447	9.117	12.153	11.759		15.578	14.841	14.627	9.372	12.498	13.255
																				8.466	13.572	6.47	8.322	8.999		6.244	15.416	7.458	15.076	12.511	10.229		18.86	10.023	17.539	10.298	9.651	14.563
																				6.105	12.704	10.314	9.816	11.038		9.495	12.098	15.144	9.697	14.038	12.026		18.902	14.134	16.172	8.87	9.085	13.717
																				10.334	11.93	8.741	10.265	12.5		13.251	11.237	15.608	9.937	13.885	15.562		15.449	7.804	14.49	12.498	10.687	13.037
																				15.563	10.66	6.612	14.084	10.193		13.38	12.327	9.533	8.154	10.66	9.242		18.962	9.577	8.871	9.828	5.512	12.921
																				11.363	8.992	7.143	7.97	12.494		9.653	11.004	10.299	10.186	10.294	12.849		13.396	11.255	13.38	15.59	14.209	12.601
																				14.768	11.037	7.768		10.396		9.102	11.558	13.384	9.488	12.457	11.357		17.828	9.242	11.211	12.584	13.426	10.47
																				7.722	11.662	6.96		9.243		10.775	8.87	11.037	11.694	8.867	10.002		15.924	10.76	8.541	14.047	13.528	12.584
																				7.35	12.402	7.572	10.298	11.761		11.753	9.637	7.805	7.722	11.025	7.906		11.761	9.242	10.667	12.417	10.518	15.339
																				10.47	15.849	9.03	9.578	10.298		14.877	10.775	8.154	11.887	12.199	10.986		14.783	12.4	9.465	12.36	10.001	14.7
																				11.79	14.999	8.405	7.722	9.533		15.029	10.518	12.602	10.284	14.313	14.415		13.072	11.037	13.142	8.829	9.349	11.881
																				9.958	12.4	8.566	10.059	6.815		11.663	10.901	16.204	13.055	10.769	11.135		13.682	9.828	9.243	9.372	6.74	14.174
																				11.953	11.529	8.102	7.878	6.88		11.694	10.547	12.772	13.007	17.498	11.024		11.741	11.356	16.968	9.365	8.829	12.77
																				11.614	14.007	9.35	8.871	9.662		9.909	9.487	12.653	8.716	13.964	9.871		12.121	12.284	11.688	10.606	6.513	13.222
																				10.101	11.523	9.156	15.333	10.334		9.85	9.095	8.838	8.383	8.338	10.84		16.715	8.632	12.098	11.344	13.416	11.557
																				12.607	14.23	10.299	11.553	12.263		14.783	8.862	14.311	11.111	9.937	15.161		14.511	8.934	19.339	12.948	13.271	16.695
																				11.082	14.841	7.272	6.461	10.356		10.34	11.791	13.396	10.377	12.317	11.388		18.563	11.581	12.602	12.871	9.03	11.953
																				8.508	9.881	7.202	8.56	6.714		17.724	9.157	17.103	8.621	11.553	16.105		12.517	13.649	12.811	11.242	8.465	15.114
																				9.311	10.714	6.436	7.216	9.095		16.932	10.545	10.284	11.186	11.663	9.958		16.121	12.697	13.544	12.86	9.164	12.096
																				8.049	12.326	7.113	9.641	7.564		15.448	13.765	8.74	11.769	10.21	10.081		18.212	11.415	12.849	8.465	10.707	11.832
																				7.986	11.827	4.559	11.037	9.467		9.844	9.674	8.911	11.652	10.344	11.14		15.973	11.024	17.959	12.36	8.78	12.601
																				13.514	13.899	5.792	5.143	11.111		6.981	7.194	10.396	14.388	16.384	9.872		11.589	13.96	15.163	12.532	10.707	12.072
																				9.312	9.117	6.436	10.26	9.237		15.13	12.079	9.242	10.828	10.474	7.515		14.231	11.513	14.568	9.156	12.584	14.33
																				8.715	12.022	9.829	7.631	8.402		11.135	12.12	9.734	10.575	11.209	9.578		15.755	10.023	8.741	15.608	9.464	12.532
																				8.837	9.481	6.96	9.466	7.764		12.36	8.542	7.804	10.717	14.816	11.791		12.849	11.857	13.714	10.332	7.959	13.416
																				7.878	10.763	9.165	16.743	7.837		13.396	9.031	8.935	8.633	7.768	9.555		13.142	13.07	17.142	13.717	11.513	12.584
																				8.03	12.72	7.805	8.993	8.642		14.417	10.229	11.39	7.383	11.373	9.938		11.76	10.158	17.504	11.024	15.442	10.193
																				11.688	11.953	10.9	9.465	7.805		14.727	8.871	14.232	8.33	8.087	10.518		16.624	6.772	14.43	12.876	15.809	15.539
																				9.351	9.145	6.981	7.706	9.284		14.007	8.466	13.338	10.797	8.383	11.038		13.572	13.292	8.741	11.444	8.092	6.96
																				9.157	9.842	9.496	13.818	10.377		17.054	12.637	14.192	9.143	9.816	9.584		18.186	11.588	11.737	9.365	8.507	11.388
																				9.822	11.857	9.703	10.714	7.706		11.084	10.299	6.981	8.668	9.284	8.583		15.262	12.231	18.795	9.464	9.494	13.591
																				11.364	6.612	9.729	13.443	9.073		14.624	10.84	12.873	9.398	13.182	11.057		17.14	10.193	11.852	13.443	9.532	12.208
																				8.642	12.12	7.908	11.972	8.551		13.919	6.773	10.927	10.002	8.166	9.995		17.121	16.118	9.938	11.538	12.725	9.494
																				8.542	8.837	10.411	10.002	9.365		12.811	7.878	8.936	9.37	8.996	7.959		15.087	10.919	8.707	12.584	12.03	13.779
																				9.149	8.707	9.596	11.358	9.701		11.514	13.427	8.806	8.929	13.821	7.796		21.792	10.101	9.994	8.507	11.557	12.486
																				7.458	11.532	9.662	8.303	9.507		13.781	9.495	13.397	8.219	10.395	13.717		19.024	9.703	9.822	5.628	14.627	12.72
																				8.049	4.848	10.229	12.208	6.818		13.53	10.721	10.662	9.136	9.513	11.539		17.14	9.365	10.25	9.85	12.601	10.545
																				10.002	6.246	11.437	13.396	7.45		19.925	13.396	13.386	12.046	7.283	10.979		17.501	10.395	11.557	11.024	12.921	11.004
																				10.34	14.766	10.764	11.256	8.824		14.134	12.026	9.697	10.06	8.782	8.022		13.764	12.697	10.101	12.486	11.741	11.735
																				9.555	15.851	9.647	9.243	9.26		13.257	11.256	10.689	10.896	8.407	10.002		12.653	10.193	10.927	6.96	19.641	6.3
																				9.095	17.12	9.938		6.693		15.002	10.002	9.243	8.406	9.399	13.481		13.966	9.554	7.233	9.908	14.729	8.632
																				10.193	9.149	11.29		8.97		14.332	10.547	8.191	8.725	7.312	10.668		10.827	14.39	11.037	8.91	8.829	11.971
																				9.242	14.491	8.929	10.081	6.944		10.927	9.85	12.862	11.358	12.127	11.741		10.607	10.525	10.332	7.202	17.417	12.208
																				7.351	10.66	7.404	9.578	8.571		11.459	9.373	13.901	9.26	10.55	6.698		10.471	10.298	9.312	7.282	12.119	13.384
																				11.038	15.924	6.714	10.472	10.425		12.811	9.494	15.088	7.98	9.157	11.832		7.351	10.228	11.882	9.828	10.76	13.271
																				10.827	12.704	9.461	8.022	9.734		8.716	8.508	9.909	6.448	10.792	9.77		14.915	10.221	8.542	8.91	12.697	13.314
																				8.583	15.526	8.443	6.247	7.068		14.07	7.666	13.418	6.015	15.36	13.185		15.077	9.164	8.999	6.824	14.899	11.004
																				7.906	12.872	11.602	11.973	7.874		12.332	8.935	8.156	9.73	10.349	11.973		11.779	13.206	8.269	8.302	14.25	10.193
																				9.873	12.692	12.602	12.499	9.399		12.856	12.725	11.743	6.604	11.038	14.19		11.743	11.255	7.202	10.84	14.23	10.66
																				11.496	15.783	12.902	11.972	8.561		13.053	10.285	10.608	8.93	11.547	9.908		16.062	9.85	17.45	7.986	9.696	10.284
																				9.651	12.121	11.024	10.607	13.545		14.367	10.841	12.192	10.103	11.706	8.583		12.402	13.053	13.898	10.023	9.703	10.186
																				11.005	13.631	9.431	10.9	11.415		11.614	11.755	6.826	8.459	9.504	10.842		15.149	9.769	18.095	12.854	12.921	7.272
																				10.708	12.304	9.504	9.909	11.792		12.878	9.873	11.365	8.408	11.562	12.811		14.564	9.218	13.314	11.178	12.921	11.953
																				10.668	16.731	8.604	9.366	13.885		11.496	8.508	11.515	7.989	13.049	8.337		12.922	9.494	14.39	10.47	13.222	12.86
																				12.772	13.664	9.507	8.999	16.605		9.651	9.211	9.374	7.852	9.244	9.873		6.447	15.372	18.84	12.12	13.591	11.444
																				13.143	12.08	7.95	10.841	15.759		16.298	15.65	11.295	7.044	13.692	10.927		6.244	11.971	17.039	8.74	10.984	11.741
																				10.84	13.396	8.824	9.734	10.628		6.301	11.514		9.931	11.854	12.192		15.809	13.96	10.687	8.74	12.22	10.986
																				13.53	12.883	9.073	9.674	10.471		12.025	8.407		9.937	11.285	7.515		15.906	7.35	12.072	7.804	14.052	12.921
																				12.221	12.402	8.142	13.676	14.49		8.155	11.005		5.757	10.715	11.365			11.388	15.745	7.272	11.513	6.513
																				10.299	15.542	7.458	17.014	11.257		8.303	9.844	12.192	11.175	12.192	11.558			11.356	12.096	9.093	15.26	8.837
																				10.848	7.443	6.427	9.96	11.889		4.233	13.17	12.5	10.581	13.182	8.824		20.711	14.011	14.7	8.998	12.691	9.936
																				10.827		10.396	9.488	13.245		7.61	10.334	13.245	9.96	13.572	9.994		13.336	10.08	12.096	7.457	10.101	6.824
																				12.139		8.799	13.245	11.889		4.283	7.572	13.675	12.377	14.848	7.819		15.185	15.818	12.584	9.211	7.58	9.958
																				13.224	13.25	9.048	10.06	11.39		11.293	10.761	10.159	12.073	12.325	9.996		14.23	11.037	14.494	9.696	14.415	12.096
																				13.445	9.464	6.981	9.704	9.733		15.077	7.233	12.721	11.514	15.901	10.711		10.709	12.601	10.228	11.388	9.157	9.871
																				10.984	11.237	7.782	10.499	9.674		13.96	8.19	12.12	8.364	13.573	8.338		6.96	11.538	16.065	14.725	14.809	10.193
																				7.61	10.444	10.158	12.607	10.601		14.39	9.03	10.334	12.607	12.834	10.193		10.396	9.403	15.521	12.893	8.708	15.521
																				10.842	9.994	8.129	9.675	5.628		8.129	9.652	15.541	11.006	10.247	9.995		11.663	12.652	11.513	6.469	17.419	7.959
																				10.285	8.993	9.243	13.072	10.668		12.079	10.518	12.861	12.878	11.193	11.142		9.851	14.99	14.622	15.26	15.22	9.769
																				13.724	15.578	9.611	10.298	8.337		10.06	8.998	14.39	10.607	11.827	10.414		11.294	11.388	15.594	10.332	13.962	10.667
																				11.212	15.673	7.156	14.511	10.709		15.851	10.769	5.628	9.282	12.811	9.064		9.651	8.172	12.937	13.898	13.294	10.193
																				10.827	13.257	10.204	13.273	8.566		17.016	11.972	9.093	10.628	13.719	9.558		10.101	9.732	15.236	11.255	13.077	9.908
																				11.025	8.508	9.911	9.96	7.184		13.185	11.293	7.571	9.829	11.694	9.86		8.91	11.388	13.57	10.284		9.211
																				11.294	9.937	8.559	13.961	7.618		9.844	12.121	11.851	12.263	8.71	7.907		14.251	14.385	10.084	14.763		11.538
																				9.734	11.688	9.398	9.488	8.566		13.386	13.314	11.18	10.924	9.58	11.384		6.436	11.363	9.242	13.222		12.377
																				12.5	7.904	8.62	11.588	11.851		17.265	10.334	12.098	11.735	8.741	6.105		8.328	10.626	9.03	12.231	14.251	11.024
																				6.981	9.844	6.689	13.224	7.96		15.924	11.741	15.26	10.341	13.676	12.511		14.464	13.026	9.148	11.532	16.121	9.82
																				10.285	11.792	9.917	9.149	7.768		11.294	9.365	11.057	12.546	12.699	9.321		12.811	10.926	10.714	14.622	10.688	10.47
																				10.472	13.17	7.621	6.709	8.998		11.972	10.333	12.114	10.979	12.303	9.692		17.035	11.388	7.571	11.735	16.538	11.356
																				11.025	14.629	5.628	8.269	10.193		16.349	12.026	16.067	12.488	14.326	10.077		16.604	12.208	15.128	15.539	8.021	9.464
																				10.668	10.194	10.101	11.025	7.457		12.585	13.294	13.655	10.159	13.712	7.603		14.975	10.298	14.807	7.282	11.446	13.384
																				12.693	11.59	7.006	9.157	12.261		11.057	10.193	12.326	9.652	9.494	8.621		14.763	10.298	8.048	13.512	12.546	9.703
																				13.224	9.135	8.687	6.47	9.937		13.168	7.768	13.337	11.583	12.893	9.399		17.169	10.332	8.092	11.004	12.331	6.824
																				15.073	13.409	6.773	9.873	9.218		14.544	11.779	9.652	12.22	14.321	13.537		14.783	10.518	8.507	11.759	13.718	12.22
																				7.906	10.355	10.616	12.361	7.351		16.606	9.03	12.233	11.613	13.587	8.329		14.918	17.102	9.908	12.515	14.702	10.415
																				11.887	11.496	6.448	10.761	10.059		9.471	11.955	14.407	12.54	11.092	8.356		19.761	7.904	8.172	12.691	11.135	8.465
																				11.827	12.725	7.096	9.282	6.773		11.515	9.908	11.357	17.372	12.208	10.285		14.487	12.208	9.994	11.388	13.053	11.881
																				15.447	10.285	10.717	9.584	13.593		11.753	10.194	11.971	8.583	8.101	10.757		14.607	15.608	11.14	11.513	9.365	10.84
																				14.807	9.733	9.771	10.901	9.156		11.827	12.079	12.699	9.149	9.556	9.533		17.119	11.857	8.805	13.053	12.073	10.767
																				12.031	9.243	9.307	10.103	10.606		11.365	11.971	12.049	13.224	10.245	8.726		14.285	10.66	10.827	11.79	13.294	11.971
																				7.619	10.417	11.037	8.708	11.39		11.18	13.026	15.152	8.715	13.55	9.555		14.612	11.037	14.209	9.464	13.883	10.919
																				11.971	7.351	8.978	12.402	12.049		13.126	13.649	11.34	6.733	15.406	11.2		14.39	12.486	8.934	10.023	14.39	12.048
																				12.191	11.832	9.656	8.337	14.901		13.396	12.601	12.281	9.095	11.288	12.563		12.921	14.543	11.692	8.172	13.427	12.921
																				10.519	12.17	8.094	8.154	14.919		8.78	15.815	12.074	10.709	9.276	9.675		14.913	15.754	16.33	8.739	15.542	13.96
																				10.979	11.761	8.175	7.96	8.633		9.958	12.534	13.516	8.741	11.675	8.969		9.471	10.984	12.725	11.255	13.635	12.072
																				7.805	13.759	5.542	10.769	16.107		10.06	12.533	9.321	13.143	12.704	7.722		18.312	12.12	12.072	9.828	8.362	11.363
																				7.233	14.287	8.349	12.894	13.593		8.838	10.193	11.271	9.873	13.05	7.351		15.338	12.948	15.813	9.03	11.004	12.417
																				11.005	15.002	8.652	7.805	13.719		10.081	12.533	10.616	12.263	12.717	10.657		8.043	14.7	17.45	9.842	13.78	11.21
																				10.714	14.231	7.906	11.761	12.073		10.298	10.84	16.935	9.653	12.528	12.049		20.477	10.66	12.854	10.626	12.12	14.33
																				13.724	11.737	8.035	7.282	10.059		19.743	11.237	12.263	10.193	15.522	10.495		17.678	14.365	11.557	10.606	14.175	8.998
																				7.805	11.496	9.284	7.796	10.606			13.009	8.357	7.35	11.134	9.404		6.058	12.208	11.344	9.994	15.448	12.22
																				10.334	14.257	5.977	11.457	12.861			12.534	10.774	10.92	9.733	11.738		16.631	12.261	8.465	11.735	11.459	14.563
																				10.299	14.009	6.757	13.244	10.662		22.539	11.363	8.642	9.28	14.197	11.344		16.436	11.494	8.154	11.79	11.558	10.66
																				9.118	12.209	9.512	11.39	11.887		16.065	13.125	11.707	10.927	8.059	13.65		14.976	12.11	5.46	11.037	14.746	17.984
																				7.619	8.508	9.64	10.47	12.116		17.699	13.12	9.918	9.821	10.513	9.149		14.211	14.068	9.464	9.696	14.013	12.492
																				7.204	11.142	6.538	12.209	13.572		16.759	11.457	13.519	9.35	13.06	10.737		13.313	11.692	8.837	9.349	12.494	10.559
																				8.708	12.923	9.675	9.675	12.032		11.513	12.325	11.295	9.652	10.795	14.064		18.644	12.937	9.093	12.208	11.827	10.332
																				9.242	7.96	8.727	12.209	12.419		15.594	12.36	8.725	11.237	8.709	11.2		18.552	13.628	7.425	13.427	14.491	8.405
																				11.588	8.129	7.671	13.967	14.609		13.308	10.774	12.875	9.77	10.762	8.872		13.89	16.295	9.871	9.349	13.292	8.739
																				14.465	12.122	5.421	9.873	9.873		12.771	13.223	12.895	12.692	9.464	10.426		15.922	15.539	13.57	8.739	15.917	9.471
																				9.821	14.915	5.149	8.502	12.221		19.111	13.555	10.349	10.943	17.053	10.035		13.545	11.037	11.85	11.612	13.206	11.581
																				10.299	11.384	6.627	11.834	12.811		14.176	14.887	9.653	13.072	15.927	7.383		11.256	11.004	15.26	9.464	17.102	9.584
																				13.055	9.117	10.019	11.583	10.003		15.261	12.854	7.035	12.488	12.809	11.174		11.388	12.515	15.576	6.424	11.293	7.282
																				9.165	12.697	11.524	12.327	10.103		10.081	12.584	10.23	9.218	11.79	8.247		15.814	11.881	10.626	9.651	13.249	10.498
																				10.761	7.721	8.442	12.873	14.367		13.293	11.832	12.517	12.705	14.33	8.218		13.544	10.248	11.382	7.804	17.948	9.101
																				10.395	8.466	7.283	11.346	10.776		7.666	13.428	9.09	13.227	12.584	10.097		11.589	16.622	12.544	9.494	11.881	9.164
																				9.938	9.118	7.496	10.299	13.251		19.277	10.926	8.897	9.934	11.32	11.51		16.951	14.43	12.635	11.513	13.07	7.232
																				10.722	8.633	6.326	11.415	8.863		12.138	9.311	10.975	8.633		11.865		12.854	10.919	13.649	9.815	14.285	8.465
																				11.973	9.35	7.582	10.662	8.782		14.544	13.396	11.026	9.35		9.415		13.251	11.363	10.707	9.414	13.717	10.978
																				10.081	11.384	5.878	8.708	15.611		15.073	12.073	9.671	8.434		10.168		7.709	13.009	12.546	8.551	14.31	11.004
																				10.98	11.832	9.654		11.187		7.073	11.037	9.997	7.961	7.67	8.979		12.478	11.004	11.938	8.172	9.958	8.048
																				4.559	10.059	7.489		10.769		11.496	11.135	9.597	9.779	9.46	14.257		11.024	10.687	12.584	8.75	12.635	11.004
																				10.194	10.395	9.837	13.428	12.402		10.669	11.779	9.284	7.248	11.76	9.065		5.729	11.255	11.296	8.582	6.243	8.998
																				11.058	8.975	8.139	6.981	9.488		12.192	10.194	8.054	7.873	13.603	6.363		6.09	13.07	13.47	9.292	12.871	9.494
																				12.699	8.269	8.173	7.233	12.027		11.688	13.57	7.208	11.135	11.515	11.084		11.761	12.096	11.552	7.459	11.513	11.255
																				11.515	7.312	8.806	11.082	9.586		11.025	14.784	11.775	11.284	10.667	8.594		10.299	10.984	10.881	8.032	8.632	8.998
																				11.346		10.968	9.844	13.89		10.842	10.848	16.022	10.306	8.263	7.95		16.905	11.056	11.85	8.799	18.143	11.388
																				10.669		8.824	9.653	15.088		8.708	11.539	11.145	12.076	8.57	8.032		9.96	9.949	17.014	7.769	13.222	10.984
																				12.586	11.857	7.438	10.761	11.18			10.56	14.09	6.016	8.268	11.442		13.251	12.893	13.759	8.896	12.854	11.185
																				10.561	11.18	8.501	11.663	9.771			11.388	10.039	8.85	9.282	12.872		9.703	11.612	9.577	7.988	11.133	9.211
																				8.304	12.032	9.512	7.184	15.444			14.405	11.586	10.082	9.675	11.971		6.668	11.178	12.36	11.21	12.12	14.39
																				9.157	14.392	8.129	10.84	12.08			12.699	13.184	8.434	8.441	11.11		12.959	9.85	13.649	8.191	13.57	7.072
																				12.951	9.704	11.663	9.101	11.792			14.809	12.499	7.404	12.339	10.711			10.76	8.739	10.535	9.958	8.934
																				7.805	8.258	9.844	8.269	11.006			13.92	7.196	7.986	10.097	5.929			12.893	9.242	7.272	12.719	9.464
																				12.362	11.18	11.743	9.351	10.187			12.418	9.838	9.641	8.866	11.194		15.564	11.185	14.568	10.327	16.203	8.974
																				9.697	9.938	11.973	11.792	8.338			12.534	8.916	10.238	10.762	6.259		11.515	13.244	10.332	9.134	11.004	8.405
																				13.724	10.901	8.466	8.466	12.327			9.148	9.106	7.372	16.106	7.283		9.149	9.156	7.495	8.536	16.967	7.986
																				9.465	8.049	9.495	13.418	16.607			13.443	6.35	8.805	10.04	8.97		12.379	7.986	12.532	9.399	13.96	7.656
																				10.715	9.118	10.608	13.396	9.996			9.995	9.882	11.549	11.938	13.168		13.572	6.908	11.741	9.016	14.875	10.284
																				8.863	7.878	8.508	11.142	10.285			10.84	9.773	10.662	6.668	9.314		13.224	13.394	10.332	11.759	14.25	14.33
																				12.192	12.95	10.979	10.56	10.396			9.156	12.672	7.96	6.778	8.716		15.261	7.142	9.769	10.172	10.332	8.998
																				11.614	8.633	10.251	10.721	11.446			10.84	10.608	9.652	13.807	10.48		13.677	10.221	10.193	9.244	11.753	13.654
																				8.542	10.101	11.413	7.878	11.743			10.84	8.571	9.838	11.296	9.772		12.192	12.19	8.87	9.67	8.2	12.22
																				11.295	13.651	11.955	10.514	11.459			9.908	12.276	8.838	6.292	6.669		13.011	11.255	10.72	8.218	10.424	8.641
																				9.909	10.715	11.827	10.331	8.634			10.842	11.973	6.668	7.372	9.156		12.032	14.25	9.117	9.673	9.699	12.697
																				11.852	11.237	10.023	10.981	6.961			11.663	13.379	8.348	9.404	11.676		12.192	12.208	9.651	7.686	10.926	11.759
																				10.829	9.404	7.804	12.536	11.59			13.338	13.039	10.735	8.102	9.734		12.262	11.662	11.293	7.818	11.434	9.28
																				9.366	14.146	7.073	10.616	6.07			12.049	12.587	11.271	9.282	8.783		11.005	12.515	11.513	10.908	11.675	12.325
																				10.842	8.328	6.741	13.893	7.144			11.514	11.397	9.399	12.498	9.817		14.049	12.691	10.606	8.191	11.255	12.893
																				8.642	9.734	6.301	10.901	9.873			9.577	4.826	11.805	8.635	7.195		12.721	11.79	14.454	9.181	12.585	13.649
																				10.341	10.263	12.233	10.396	6.163			8.715	8.72	12.986	10.98	12.653		19.399	11.056	13.222	10.762	10.348	15.534
																				8.173	8.364	9.829	14.392	10.251			8.405	10.076	11.956	10.993	10.26		14.365	11.692	10.001	10.343	10.606	13.119
																				8.466	16.26	8.269	12.86	16.676			11.688	12.985	8.709	13.206	12.211		15.114	11.741	8.739	9.651	10.101	11.887
																				8.542	11.852	8.589	7.572	10.722			13.57	13.958	14.607	11.693	8.102		13.714	12.606	7.904	8.174	12.291	15.539
																				9.313	14.745	9.495	14.006	12.603			11.363	11.553	8.148	12.727	6.698		16.507	10.606	6.949	10.98	13.697	11.457
																				10.06	15.128	8.83	11.413	7.666			10.761	10.986	9.933	13.245	8.621		12.849	10.76	11.236	8.441	12.351	12.452
																				9.243	14.07	6.612	9.652	10.299			12.191	12.586	10.875	10.979	12.895		12.721	15.076	6.824	8.872	9.369	11.612
																				9.578	15.22	9.35	16.172	10.223			10.102	13.759	7.272	12.697	14.976		20.377	11.344	8.641	0.189	17.011	14.607
																				8.338	12.209	8.839	13.572	12.546			10.841	4.926	6.859	12.487	13.717		16.121	9.156	8.837	9.236	9.43	8.715
																				11.365	12.494	8.975	12.861	10.689			11.294	10.581	9.934	11.293	16.675		12.327	10.767	9.936	9.66	14.003	7.232
																				11.384	8.716	6.47	8.466	7.515			10.721	12.117	6.983	13.512	9.404		9.586	10.249	10.193	8.503	10.908	8.87
																				10.601	9.212	8.056	13.386	10.715			10.249	10.616	9.779	11.851	12.922		13.781	12.031	9.532	11.857	11.004	9.101
																				10.251	10.472	6.117	11.539	8.806			9.373	10.921	9.911	11.662	9.994		17.676	13.075	9.164	9.486	17.796	9.908
																				10.299	10.608	6.117	9.652	6.826			13.593	11.185	8.036	9.117	13.009		16.735	12.19	12.635	10.186	13.57	12.635
																				12.5	13.244	8.023	9.095	11.084			9.77	11.846	7.88	13.528	13.053			8.78	12.606	11.056	8.91	11.953
																				12.637	10.415	7.184	11.294	10.722			10.498	12.515	9.087	7.796	11.971			9.908	11.513	10.193	12.048	9.349
																				9.675	10.334	11.005	9.465	7.515			11.614	12.918	9.26	10.186	10.299			10.284	8.805	12.635	13.141	13.712
																				9.212	9.937	7.144	10.519	10.396			12.872	8.364	8.686	9.994	15.61			12.498	9.828	5.889	10.626	10.919
																				11.792	12.721	11.295		6.95			9.995	8.246	12.187	9.652	14.978			9.696	8.715	11.857	10.228	15.672
																				9.118	8.782	10.545		9.366			10.158	12.258	10.994	14.545	14.591			10.599	8.54	12.809	14.405	13.862
																				11.743	11.295	10.251		7.722			10.101	12.283	8.142	10.606	9.995			13.335	11.037	9.156	16.848	13.184
																				7.515	14.73	6.069		10.396			10.229	8.996	8.975	8.507	13.65			15.33	10.47	10.186	11.388	9.958
																				11.755	11.583	6.057		8.708			11.005	11.256	9.143	10.714	15.26			8.362	10.714	9.994	15.203	10.767
																				6.448	8.466	9.157		11.257			10.158	8.087	8.753	10.774	14.013			12.584	9.651	11.494	11.662	7.959
																				10.52	13.075	7.959		8.338			11.383	9.106	7.805	9.675	7.619			13.427	10.332	9.651	15.851	8.38
																				11.663	10.187	8.032		9			10.249	8.97	10.441	11.363	9.464			6.346	9.486	9.164	12.959	11.14
																				9.873	10.444	7.312		8.156			12.872	8.451	9.512	8.583	10.761			12.871	11.037	11.255	13.037	13.528
																				10.628	10.92	6.105		8.839			10.332	6.96	11.384	7.721	7.878			11.532	13.649	9.871	15.26	12.137
																				9.313	8.303	8.311		9.157			10.193	7.723	12.046	10.708	7.351			8.465	12.377	11.413	11.037	13.292
																				11.515	10.417	6.857		7.768			9.958	11.986	10.514	11.741	17.469			10.827	12.515	10.284	18.798	11.004
																				8.269	9.96	8.716		8.329			12.191	10.984	9.989	11.857	13.396			11.14	10.919	13.384	10.415	13.298
																				10.608	12.849	8.466		6.741			9.696	12.261	9.283	12.331	12.049			11.004	10.415	11.382	10.559	13.206
																				13.338	9.651	7.796		8.364			8.566	8.219	9.925	9.995	10.229			12.208	7.282	13.249	14.913	12.377
																				7.273	9.844	8.642		9			10.774	5.59	10.425	12.72	11.004			12.959	9.349	12.031	13.443	14.999
																				11.39	11.004	6.07		8.381			9.464	8.969	8.993	9.148	16.557			10.919	11.413	7.232	7.959	11.826
																				8.312	10.608	7.582		8.542			10.626	14.605	8.348	11.662	11.459			11.513	11.494	8.507	8.829	6.824
																				10.628	10.396	9.157		9.405			7.986	9.597	8.485	12.725	11.005			13.271	14.39	9.703	13.335	8.503
																				9.366	10.444	8.173		6.514			9.995	6.405	8.72	12.921	11.583			10.525	12.86	12.584	14.068	10.479
																				9.651	10.662	7.437		10.709			12.377	8.302	7.233	8.837	12.361			14.189	13.517	10.415	9.842	9.23
																				10.84	10.901	7.544		7.572			11.588	9.345	14.991	12.893	10.23			8.739	12.032	11.832	14.174	9.384
																				8.935	8.049	8.542		7.666			9.118	8.265	10.266	9.696	11.971			13.443	12.379	12.854	12.72	12.208
																				14.545	9.844	9.101		7.467			9.365	8.466	14.211	11.779	12.585			13.394	15.076	10.158	17.796	9.974
																				12.544	7.571	9.533		8.338			15.673	12.305	9.085	11.76	14.49			11.293	13.077	11.242	13.378	7.026
																				16.174	11.515	6.95		7.467			8.838	8.559	11.581	14.934	12.36			10.926	12.894	12.876	15.809	8.62
																				9.908	9.095	7.042		7.113			9.651	8.604	10.299	12.539	9.118			11.037	15.33	9.117	13.717	7.665
																				12.601	8.049	7.458		11.238			10.332	9.99	11.357	13.68	8.974			14.33	20.124	11.382	16.172	7.155
																				12.699	9.488	7.496		8.032			10.608	11.743	9.311	11.037	12.54			12.77	15.34	13.68	12.871	9.23
																				10.499	11.589	7.805		10.341			7.072	7.572	12.921	11.457	14.465			9.365	12.923	12.893	13.718	7.459
																				12.22	12.722	6.698		8.269			11.79	7.351	13.386	12.876	17.121			10.08	12.653	10.101	8.465	7.006
																				8.102	12.862	6.741		8.741			8.38	9.157	12.584	10.47	17.907			13.57	12.208	8.092	14.568	9.532
																				11.294	17.999	8.74		8.741			13.251	10.607	9.473	13.883	14.192			7.804	9.218	8.837	12.454	6.827
																				12.418	11.883	8.406		11.59			12.208	8.538	9.35	6.267	17.188			12.725	13.037	9.28	12.861	6.625
																				12.653	10.842	6.825		9.473			13.714	5.388	11.495	9.828	21.256			13.792	10.98	9.577	15.453	6.692
																				9.704	14.511	9.696		9.165			11.955	8.263	13.416	13.055	22.882			9.651	15.029	8.632	8.19	10.193
																				8.998	13.224	7.805		7.96			10.472	8.219	10.299	12.192	14.843			11.513	8.74	12.072	15.22	8.325
																				12.494	12.873	5.692		8.304			10.709	8.054	9.652	9.085	13.026			15.372	12.12	8.837	16.697	10.919
																				10.444	8.999	9.908		7.768			10.842	8.094	8.406	11.779	11.851			12.871	13.222	12.584	13.714	6.243
																				9.117	9.653	9.404		8.094			12.169	7.025	10.601	10.707	9.881			15.028	12.12	9.696	13.6	7.609
																				11.663	15.565	6.163		6.514			10.186	12.834	10.298	12.261	11.078			6.908	11.589	8.465	10.471	10.76
																				9.873	15.611	5.354		8.936			12.709	6.428	11.581	9.651	15.551			11.293	11.135	11.513	12.137	13.633
																				11.135	14.57	7.113		9.473			11.445	10.076	8.583	13.528	11.919			11.79	9.872	10.186	7.282	8.649
																				10.519	10.547	5.926		7.233			10.444	9.466	13.418	10.298	12.872			8.507	12.539	14.25		8.101
																				11.694	12.608	7.073		6.163			11.243	10.438	10.626	9.908	9.699			11.662	4.936	9.577		9.093
																				12.139	13.651	5.986		8.912			8.583	6.692	11.293	14.365	9.934			11.133	10.607	7.232	16.527	9.494
																				11.583	11.558	7.987		9.938			12.5	7.878	11.851	14.622	9.242			12.893	11.76	11.185	18.396	6.98
																				9.404	12.032	8.466		9.366			11.686	10.535	12.21	12.725	12.199			13.649	10.628	10.72	14.064	12.601
																				12.049	12.895	7.184		11.256			7.495	5.944	10.9	13.337	9.073			11.581	6.469	11.024	12.538	9.372
																				12.418		7.805		11.025			13.428	8.993	13.224	13.053	8.651			14.144	7.572	8.837	9.668	13.314
																				13.764		8.094		11.686			8.302	8.459	12.517	8.102	9.578			12.12	8.633	10.559	16.332	10.525
																				10.901	16.071	8.633		8.583			11.557	12.153	10.499	9.697	9.244			10.626	8.975	8.632	11.987	8.302
																				9.404	12.877	11.973		8.806			8.149	12.889	9.212	11.741	8.866			11.457		8.465	15.667	6.104
																				11.038	11.583	7.666		11.761			14.878	9.03	11.084	11.495	9.482			8.829		13.222	12.974	8.048
																				12.032	9.652	6.857		9.373			13.206	12.717	10.842	7.042	12.636			10.518		8.507	11.86	14.543
																				9.157	9.652	6.535		8.312			12.121	7.067	9.908	9.908	14.594			12.19	17.741	8.048	12.038	11.662
																				10.341	8.87	6.163		8.935			11.677	5.542	9.872	12.049	7.962			13.244	12.499	6.611	11.509	10.899
																				11.851	11.557	6.117		6.826			9.19	8.758	7.906	8.641	10.924			13.423	10.23	7.58	11.243	10.339
																				9.842	8.782	7.987		9.651			9.096	8.61	13.011	15.13	14.332			10.395	13.682	9.117	14.046	9.554
																				13.244	10.193	6.163		8.838			12.275	9.373	14.013	18.096	13.182			10.545	18.769	7.072	13.409	9.936
																				10.34	8.311	8.337		7.666			13.268	8.806	13.724	13.12	9.616			12.809	11.779	7.282	12.962	9.871
																				10.761	10.444	6.07		8.634			12.834	11.581	9.908	13.12	7.216			15.26	15.924	7.282	9.421	9.403
																				7.192	12.419	7.351		9.157			11.602	8.621	9.871	8.302	10.356			12.325	15.374	7.571	11.887	7.232
																				12.192	11.779	7.042		9.031			12.275	9.637	10.002	16.815	8.253			13.378	13.251	6.96	11.316	8.837
																				7.58	12.139	9.465		8.935			11.751	8.476	11.243	11.024	9.845			10.66	12.12	11.532	9.713	11.857
																				11.294	9.085	7.722		9.908			10.328	6.669	11.561	11.005	11.182			12.284	16.311	10.298	10.097	9.842
																				11.459	9.35	6.244		6.698			10.034	11.857	10.308	8.871	10.843			16.282	10.526	10.193	11.92	9.842
																				12.327	11.759	8.999		6.514			11.767	9.017	7.458	11.255	11.182			11.79	11.533	8.337	11.614	8.101
																				10.333	12.314	7.61		9.156			11.201	14.783	10.657	8.566	12.314			11.513	11.142	7.514	13.896	14.744
																				8.466	7.768	8.566		6.698			11.848	12.208	12.513	12.811	12.36			11.513	9.995	10.66	13.1	13.141
																				10.23	7.95	8.312		8.466			13.546	9.769	9.527	10.98	11.973			15.704	14.726	8.189	8.19	12.072
																				10.333	4.936	12.027		8.542			12.208	13.119	10.063	14.012	10.547			12.325	12.772	7.232	17.271	10.332
																				10.92	12.893	7.666		9.118			11.774	13.416	10.455	9.28	14.967			10.767	13.96	6.162	16.489	12.697
																				8.329	11.413	11.365		7.906			12.653	11.759	9.314	13.962	9.482			11.444	11.084	9.532	9.697	10.332
																				11.693	8.641	9.851		6.448			11.95	11.388	7.593	12.726	8.685			16.622	12.895	10.332	5.914	12.697
																				10.687	10.761	9		7.58			13.023	13.119	9.918	12.314	9.466			10.339	17.368	7.804	16.438	11.004
																				13.054	12.871	11.006		12.073			16.222	11.363	8.87	11.686	9.745			13.528	15.893	11.255	14.94	11.826
																				10.56	8.303	7.805		12.361			10.596	11.759	14.785	10.687	10.452			12.031	12.121	9.403	17.796	9.994
																				10.187	7.666	9.282		8.87			12.534	13.888	8.434	11.514	12.208			10.714	13.445	10.332	16.083	9.673
																				8.311	10.84	10.547		8.583			6.18	15.414	9.918	15.152	9.745			11.538	15.261	12.606	15.89	7.571
																				9.351	10.707	10.472		13.443			14.134	11.662	9.465	10.767	10.842			9.494	13.027	11.662	8.782	7.495
																				10.249	9.149	8.782		7.878			11.553	11.881	10.285	9.148	9.617			14.763	10.986	8.91	11.005	9.349
																				9.532	8.994	10.194		8.583			12.304	12.36	10.842	9.164	9.674			13.764	8.407	11.21	14.008	10.193
																				11.357	9.242	16.663		7.351			10.285	10.298	10.439	9.696	7.805			10.101	11.79	9.732	12.885	12.377
																				11.186	6.11	15.149		10.194			11.955	9.164	10.034	7.805	10.847			9.093	11.186	9.101	14.055	9.871
																				11.834	10.454	12.074		7.805			10.804	10.249	10.554	12.692	10.545			9.735	12.546	8.974	11.185	10.559
																				12.314	11.295	11.515		7.657			13.07	13.124	10.193	10.92	7.126			10.518	11.415	7.609	11.434	9.464
																				9.995	10.699	9.873		9.652			8.323	10.158	13.472	11.753	11.34			10.518	12.544	9.464	10.168	9.211
																				14.211	12.655	10.194		8.19			13.829	12.377	12.186	5.691	11.013			12.22	14.976	11.133	11.364	10.66
																				9.373	9.963	11.761		7.572			9.86	10.228	12.761	9.596	8.476			18.202	14.465	11.513	6.481	11.133
																				9.149	14.308	9.533		6.815			11.557	11.854	9.817	12.48	10.721			11.753	16.187	10.84	10.06	12.03
																				8.633	9.504	11.761		7.96			13.551	9.778	8.769	8.227	8.863			15.33	9.908	10.193	9.211	12.261
																				6.981	8.552	8.782		10.06			12.883	11.199	8.566	13.285	12.038			15.976	10.159	10.158	8.863	9.908
																				8.634	14.415	9.533		7.042			15	8.302	8.85	6.692	5.944			12.697	8.094	10.774	13.037	13.543
																				8.173	9.917	10.901		11.589			9.175	7.665	7.027	8.381	8.71			12.12	12.871	12.325	13.571	9.673
																				11.384	10.56	7.073		9.404			12.722	8.799	12.094	12.093	8.768			14.509	12.766	11.79	13.038	10.47
																				9.637	10.019	7.073		6.709			14.221	10.145	7.705	5.944	7.365			9.584	14.915	8.934	9.675	10.468
																				7.61	10.078	11.415		7.796			13.249	10.642	8.863	9.597	10.06			16.592	11.533	8.337	9.822	12.697
																				11.363	13.256	10.472		8.19			10.863	9.696	7.576	7.726	8.83			11.255	13.244	12.36	11.446	10.926
																				9.555	8.999	11.743		7.987			14.753	11.236	8.166	6.741	9.668			10.298	12.95	7.514	12.699	7.112
																				10.525	11.663	9.118		10.714			12.923	9.321	7.708	12.317	12.098			10.525	11.135	10.72	13.655	10.443
																				8.839	6.942	13.397		9.96			12.697	10.039	9.244	10.738	10.413			8.328	16.187	10.001	17.037	6.622
																				11.004	7.614	8.269		11.513			10.559	12.36	10.804	12.822	17.012			13.141	10.417	8.362	11.588	8.78
																				7.96	12.233	12.033		7.143			11.382	12.12	9.102	11.02	13.802			9.82	12.12	6.162	14.415	11.255
																				8.935	6.84	8.508		6.961			12.691	11.459	7.283	15.114	12.211			9.28	10.715	10.395	12.192	10.545
																				11.257	7.906	6.857		8.466			9.33	12.615	11.608	12.983	11.769			10.058	13.761	9.349	12.922	10.228
																				12.95	11.284	9.873		9.404			10.547	12.809	11.602	15.388	14.555			11.255	15.262	9.494	9.085	14.134
																				9.464	8.338	12.192		9.102			13.026	13.883	9.487	9.373	10.063			10.84	9.464	6.069	12.098	12.584
																				10.84	12.049	11.761		9.085			14.07	12.966	9.77	10.244	13.149			8.739	13.677	9.156	9.872	13.443
																				12.693	8.57	9.15		12.191			9.118	6.772	7.383	10.716	8.571			11.826	14.286	7.041	9.212	11.037
																				12.12	7.535	10.561		10.498			10.715	13.336	12.235	8.033	9.284			11.692	17.859	9.769	9.577	10.667
																				12.54	7.458	9.22		11.39			11.179	10.988	9.611	10.862	18.566			10.332	13.273	8.632	12.454	10.714
																				8.863	14.466	10.709		12.487			8.633	10.581	12.655	7.665	12.191			10.395	13.316	7.795	11.761	11.662
																				9.242	12.949	10.285		8.362			10.92	11.056	11.384	13.009	15.195			14.7	9.218	11.741	10.519	12.584
																				11.39	11.365	11.761		9.465			15.96	10.395	11.95	9.504	13.443			9.365	10.159	10.332	17.221	10.158
																				8.583	11.612	8.567		11.662			10.662	11.816	10.871	9.532	16.436			9.365	13.143	9.994	12.699	11.356
																				10.299	17.22	8.466		10.187			13.649	9.174	8.929	11.81	11.805			8.74	13.714	9.936	14.465	9.908
																				12.233	12.894	9.087		8.362			12.585	8.752	12.768	8.299	11.142			10.339	11.834	8.507	14.19	9.311
																				8.129	11.572	9.556		9.101			11.851	9.43	9.837	11.953	11.549			9.28	13.396	8.641	13.428	12.031
																				9.488	9.829	10.722		12.121			11.005	10.535	9.413	10.979	13.802			8.649	11.858	8.998	11.39	10.498
																				11.038	12.902	8.269		10.298			13.25	9.156	8.33	10.863	13.388			11.887	12.209	6.435	14.702	10.395
																				10.221	12.357	8.191		14.73			9.958	13.779	9.918	10.518	11.677			13.222	10.498	8.632	15.465	10.545
																				12.079	13.478	8.329		11.237			10.334	10.417	11.855	14.33	7.135			14.975	12.585	6.104	13.781	9.464
																				10.767	12.53	11.038		13.481			13.338	12.766	10.836	9.937	10.526			8.021	13.054	10.72	9.212	7.182
																				10.84	13.82	8.782		13.07			8.716	10.722	14.253	10.334	14.018			7.665	11.532	8.507	12.121	11.255
																				9.471	13.529	10.334		11.532			12.379	9.136	9.975	12.894	9.873			5.678	10.103	7.282	11.761	15.608
																				9.242	8.979	10.299		11.613			10.334	6.772	9.844	13.443	5.986			14.174	9.496	6.48	15.651	11.444
																				9.117	8.734	10.842		10.662			11.588	9.156	8.328	11.832	7.671			13.48	10.841	6.469	13.765	11.881
																				10.119	9.506	7.666		10.333			13.428	8.576	6.891		11.382			9.769	6.709	7.986	11.135	17.956
																				11.14	12.4	6.612		9.821			11.415	7.488	8.862		14.225			9.242	15.077	8.507	7.768	10.395
																				8.337	12.034	7.113		7.282			8.708	9.451	7.631	11.294	15.536			15.185	13.224	8.302	10.298	13.512
																				9.093	12.885	8.839		11.663			14.226	9.771	8.632	13.885	12.861			10.984	9.496	13.271	8.032	9.936
																				11.761	15.804	7.544		9.102			14.069	12.127	12.687	12.153	8.406			13.037	13.885	9.464	8.303	14.563
																				12.585	16.255	7.805		8.155			13.141	11.791	9.697	9.398	11.753			11.382	13.962	11.971	12.079	8.507
																				10.84	15.562	9.366		9.653			11.887	11.206	9.345	13.734	10.341			14.543	11.135	11.857	11.255	13.57
																				9.102	13.251	9.771		8.716			14.191	13.408	12.48	14.145	15.974			15.971	9.844	10.193	13.12	6.824
																				10.081	8.583	10.561		9.494			10.978	15.138	10.097	10.616	14.489			10.72	14.134	12.809	13.245	11.741
																				11.779	12.607	9.638		9.696			15.818	9.636	7.925	10.882	14.27			11.538	12.119	10.626	12.601	11.185
																				13.384	10.08	12.489		9.555			11.496	9.414	8.993	12.483	15.61			12.691	10.687	10.687	13.185	10.84
																				10.251	8.634	10.608		11.025			10.334	12.139	9.934	15.686	8.406			9.397	17.302	12.325	16.437	11.004
																				10.628	9.674	7.351		9.533			11.256	10.023	12.419	14.438	13.385			13.722	13.919	8.092	12.079	12.452
																				8.583	7.042	7.987		10.285			14.09	10.79	8.166	12.239	16.867			12.606	17.035	16.592	13.385	11.037
																				8.708	10.687	8.466		11.084			12.538	10.306	14.096	11.588	12.95			13.965	8.829	9.471	12.36	4.866
																				10.159	8.65	9.771		8.975			11.882	14.047	10.454	8.808	9.995			16.061	15.809	10.978	11.693	10.158
																				9.937	8.302	7.233		12.419			11.135	14.446	9.842	11.603	7.986			12.325	11.056	14.884	7.272	10.395
																				11.382	6.447	9		9.652			13.3	9.466	10.521	13.049	10.926			9.156	14.25	13.427	13.244	9.117
																				10.769		8.466		12.586			16.437	7.95	8.362	11.719	13.185			12.697	12.937	13.919	11.057	9.365
																				11.384		9.586		11.539			15.523	11.377	10.499	13.445	12.326			8.465	10.525	12.893	10.721	11.857
																				10.601		12.699		8.838			10.92	10.062	10.314	11.761	10.715			14.464	14.509	11.293	13.443	7.609
																				10.396		9.822		12.938			13.185	8.707	9.183	16.279	8.03			12.22	11.037	10.395	8.583	11.953
																				11.888		7.204		7.986			9.031	8.174	12.562	10.941	10.332			10.47	12.208	7.58	15.448	8.328
																				8.634		10.334		10.173			12.585	7.63	8.914	11.511	11.662			13.816	13.443	9.349	8.83	7.437
																				8.782		10.762		9.958			14.727	9.189	11.51	8.604	6.104			9.842	15.795	15.704	9.157	11.255
																				10.173		10.277		11.344			14.415	11.236	9.312	15.173	7.609			12.36	14.209	12.36	12.121	14.415
																				10.229		10.901		12.221			10.194	8.311	8.159	10.882	13.443			9.554	12.937	11.004	13.931	17.984
																				8.154		13.482		11.005			11.365	10.223	8.297	18.342	11.293			11.971	13.244	12.261	9.958	10.847
																				10.221		10.547		12.12			11.135		9.284	13.792	9.85			10.919	15.465	12.025	13.142	8.405
																				8.74		11.238		7.272			10.25		11.175	13.129	10.193			12.948	11.759	11.857	11.142	12.498
																				12.949		7.951		8.715			10.334		8.635	13.692	9.637			11.857	10.978	10.298	14.211	13.222
																				10.66		6.857		12.878			11.514	12.239	10.189	9.721	13.026			10.606	11.513	9.349	12.032	8.715
																				13.718		10.173		11.513			10.709	9.99	11.398	11.005	13.93			13.292	13.675	7.804	12.048	7.721
																				9.165		9.822		11.741			11.39	12.095	13.106	11.951	12.81			12.725	8.302	7.112	12.849	7.986
																				8.507		10.103		8.406			10.545	10.815	11.36	10.479	10.98			13.675	18.859	10.186	12.326	11.357
																				9.102		11.973		9.821			10.222	11.345	9.844	11.986	9.149			14.33	7.041	11.185	13.024	11.037
																				7.572		8.642		6.622			11.532	10.417	8.709	12.762	11.382			15.33	12.719	8.998	10.415	11.388
																				8.634		7.796		8.508			10.417	11.038	9.494	13.756	11.344			11.612	18.641	12.377	15.262	13.271
																				9.908		9.938		10.024			11.18	12.258	11.257	11.183	13.78			13.124	14.365	11.588	15.584	7.437
																				8.809		10.124		11.741			13.126	12.311	12.693	10.244	9.465			12.854	10.023	8.154	18.297	14.006
																				7.467		8.741		9.28			10.608	13.913	7.61	7.819	10.628			10.228	17.035	11.513	10.285	12.498
																				10.059		11.743		10.194			11.539	9.465	11.514	7.825	9.872			7.311	9.211	12.606	13.142	15.686
																				9.095		8.863		8.155			13.675	14.985	9.938	17.044	13.224			14.365	12.893	11.082	8.031	12.959
																				8.049		7.768		14.415			13.12	17.596	11.257	14.726	9.373			11.178	13.649	9.871	10.444	10.228
																				10.332		6.21		9.652			13.63	15.713	8.716	16.083	9.908			13.124	14.543	9.156	12.653	11.037
																				9.937		7.233		8.715			11.364	9.638	11.857	8.155	11.459			6.96	15.409	10.606	16.494	14.088
																				7.312		7.987		12.534			13.717	12.422	9.157	11.038	11.539			13.075	20.627	10.919	11.662	11.056
																				10.499		6.058		9.937			13.055	13.111	11.212	12.95	10.498			14.134	13.717	7.571	17.481	14.31
																				8.338		8.304		6.981			12.418	10.103	11.294	12.327	12.326			12.261	11.082	7.618	13.142	10.193
																				9.909		8.542		6.469			12.498	6.84	9.842	9.366	9.696			14.25	15.608	6.98	14.09	11.735
																				7.796		8.542		5.628			10.298	12	9.311	7.194	11.539			10.47	11.185	9.732	10.545	7.609
																				9.095		8.863		6.815			12.21	14.158	10.606	14.211	13.07			9.908	13.244	12.19	14.027	10.186
																				9.211		10.396		14.053			10.34	11.384	9.697	10.059	13.072			9.82	11.185	6.513	16.38	9.486
																				10.298		8.023		8.838			13.649	10.146	8.508	13.255	11.887			16.317	13.919	8.154		8.507
																				6.436		6.981		11.539			15.608	7.382	11.446	8.838	12.098			12.584	12.601	12.19		10.978
																				10.471		8.741		6.825			14.134	9.365	11.588	10.92	15			9.311	11.21	11.382	6.47	8.91
																				9.373		8.338		5.273			10.709	8.999	11.294	9.704	12.025			9.871	9.85	12.4	7.143	11.971
																				9.851		10.003		9.157			12.487	9.165	12.499	14.391	12.871			10.76	9.464	10.058	13.53	10.332
																				12.21		8.782		6.347			11.004	10.662	9.085	9.117	9.675			10.626	15.704	9.958	14.863	10.158
																				13.528		7.906		9.496			12.921	16.209	11.005	10.229	10.841			12.114	11.255	9.908	15.41	10.298
																				8.87		14.367		12.608			15.809	15.961	7.804	16.968	8.65			13.649	14.884	9.349	11.753	8.021
																				8.338		9.366		9.496			10.545	11.004	9.908	9.995	8.935			10.827	8.337	7.804	11.358	9.958
																				10.417		14.272		7.657			14.727	10.498	10.775	7.805	8.999			12.854	14.144	12.031	18.975	11.388
																				8.19		9.102		6.612			9.938	8.593	10.34	11.972	10.499			10.415	12.652	14.189	12.697	10.978
																				16.492		10.223		10.527			10.979	11.623	9.156	7.928	10.979			11.953	12.498	8.707	9.77	11.662
																				11.294		9.366		10.187			10.471	13.902	8.634	9.212	9.652			8.837	9.494	8.405	13.919	9.871
																				8.74		11.365		11.663			8.87	13.236	9.652	10.976	10.608			13.512	10.332	8.465	16.507	9.732
																				9.872		6.825		9.638			11.293	12.834	8.38	9.37	7.183			11.826	11.178	8.172	16.438	14.884
																				8.583		11.882		14.978			10.607	8.19	10.98	10.002	8.508			11.85	10.332	8.101	17.949	9.218
																				7.96		8.19		12.419			13.12	8.838	8.65	9.671	12.096			8.74	9.311	13.965	15.015	4.605
																				10.159		10.251		11.515			16.32	7.572	10.101	12.304	7.905			14.23	13.68	10.626	17.368	9.403
																				12.72		8.741		11.459			12.137	8.553	12.12	10.5	12.325			6.104	8.54	6.209	9.22	12.544
																				9.937		10.023		10.024			12.546	10.039	12.585	9.882	10.667			8.998	15.442	7.721	17.221	9.85
																				9.165		8.741		10.527			14.25	15.707	11.179	9.504	11.858			9.403	9.936	6.824	15.229	10.525
																				10.688		9.212		9.851			13.336	11.888	10.668	8.687	8.328			12.635	12.893	10.498	15.475	10.332
																				10.101		9.734		10.299			10.687	9.431	10.333	10.976	8.381			5.38	12.137	11.588	14.545	10.395
																				10.417		10.395		8.741			11.76	11.479	10.519	8.357	13.591			12.377	13.48	5.778	13.961	9.156
																				10.472		11.694		9.15			10.92	9.049	8.269	11.888	13.314			12.22	12.893	6.346	15.029	11.082
																				7.282		11.142		11.496			12.049	8.086	3.861	8.824	11.888			13.026	10.193	11.255	13.142	9.464
																				8.741		9.465		13.055			11.39	8.823	9.117	9.504	10.186			11.686	6.908	12.691	12.872	10.66
																				9.872		10.721		8.806			12.699	12.834	10.102	9.684	9.675			11.236	13.206	8.302	8.642	10.395
																				12.032		7.072		7.283			11.057	9.373	10.228	8.269	7.805			12.86	10.158	11.133	10.341	8.715
																				9.118		13.224		5.89			11.614	10.993	9.35	8.751	15.453			8.974	15.076	4.766	13.208	9.871
																				8.708		11.754		10.23			12.693	7.907	8.715	8.769	11.39			11.444	11.513	8.815	10.444	8.302
																				9.211		10.714		11.852			12.607	7.488	9.555	9.822	15.087			16.383	12.284	5.877	15.116	9.936
																				9.148		11.539		8.466			10.341	10.341	10.298	8.871	12.137			10.66	11.662	8.154	11.761	9.349
																				10.607		10.229		10.223			11.688	12.326	11.882	10.643	14.405			11.236	14.174	5.249	11.212	10.84
																				12.121		11.384		11.187			13.037	12.305	9.909	8.889	11.243			8.092	17.699	4.499	12.327	12.809
																				7.113		9.148		8.103			10.194	7.572	9.243	10.012	14.049			12.77	15.339	11.881	16.969	9.093
																				8.466		9.095		8.716			11.737	10.092	7.572	9.641	14.405			12.12	14.607	13.394	20.821	10.193
																				13.885		8.741		11.761			11.134	12.811	7.458	9.527	14.391			11.363	18.127	13.053	11.588	12.809
																				10.9		8.337		7.458			9.118	6.292	7.805	6.293	12.079			11.826	15.114	11.255	10.775	10.298
																				13.885		7.515		8.508			9.872	14.049	7.466	11.887	10.688			12.635	12.893	12.231	10.229	9.958
																				13.444		8.021		7.906			11.955	17.189	7.804	11.76	10.9			13.07	13.57	11.513	11.14	11.363
																				11.345		11.365		11.828			11.243	9.351	9.829	9.908	12.192			7.959	14.33	13.416	20.568	11.236
																				7.496		9.586		12.333			9.704	8.551	9.488	12.049	11.971			11.887	13.255	10.339	17.675	9.871
																				9.031		6.96		8.567			13.651	7.577	9.156	8.362	15.592			12.313	17.5	14.285	18.03	11.588
																				12.772		9.578		7.96			12.377	6.623	7.96	12.602	10.298			13.222	12.601	11.255	14.052	6.824
																				9.465		9.873		7.204			13.781	8.142	9.96	11.688	9.031			9.958	13.336	10.525	10.332	11.887
																				7.666		7.805		6.815			10.444	8.364	10.023	12.81	7.619			10.47	12.072	13.255	11.887	13.184
																				11.688		8.507		9.212			11.612	8.57	9.704	13.93	12.331			11.79	12.937	8.54	15.562	9.828
																				10.019		8.998		8.338			12.601	6.292	8.782	12.95	13.395			10.774	18.795	11.363	10.518	9.732
																				8.805		13.863		11.056			8.049	9.093	8.911	10.444	10.769			11.588	12.031	6.708	12.854	14.763
																				9.734		8.19		10.251			11.851	7.575	7.959	7.666	11.357			11.538	9.365	12.948	11.513	11.004
																				13.224		7.351		8.741			11.858	12.403	8.838	10.519	8.998			13.119	10.545	14.33	9.936	12.876
																				8.155		8.741		11.39			13.427	12.192	10.769	12.326	12.139			12.4	10.518	11.185	10.497	14.285
																				12.026		8.337		7.458			11.515	9.794	14.19	12.653	11.857			9.828	13.759	14.225	11.778	16.422
																				11.515		8.634		11.39			11.14	10.603	13.249	10.294	9.872			10.847	13.427	10.66	10.193	10.66
																				11.589		7.572		11.257			12.725	7.727	12.922	10.187	11.057			8.128	12.231	10.687	10.66	14.088
																				9.96		9.734		7.113			12.137	9.466	11.514	9.278	8.633			11.21	7.437	14.144	12.498	12.19
																				10.709		9.212		8.508			10.707	10.494	14.069	13.666	12.221			13.394	10.186	10.498	15.521	10.767
																				9.653		9.637		6.961			9.311	9.283	9.031	11.149	8.83			13.443	8.582	13.07	11.293	13.554
																				8.303		10.417		8.936				8.086	13.444	12.401	10.499			11.004	13.48	8.507	14.255	9.577
																				12.032		11.791		9.533				7.067	12.032	10.103	8.022			9.908	7.665	7.202	12.601	10.001
																				11.515		7.467		13.53				10.85	7.95	5.502	7.986			11.363	14.052	8.998	7.282	8.54
																				8.303		9.351		13.963			12.23	6.983	9.533	7.204	6.98			13.244	11.457	8.268	11.004	14.027
																				10.472		8.83		12.546			13.717	7.98	10.002	10.26	13.075			13.026	12.77	9.828	14.607	11.581
																				10.827		7.351		11.006			11.556	8.508	11.779	8.219	8.741			10.84	13.255	8.465	13.053	9.584
																				8.19		8.302		9.366			16.171	10.04	13.38	15.51	14.09			14.047	11.887	8.998	10.158	7.665
																				6.908		11.135		9.909			13.553	10.454	11.858	15.755	9.404			11.953	11.388	7.311	9.156	8.632
																				9.28		9.157		13.397			12.119	7.457	10.715	12.039	13.9			6.469	8.649	9.486	12.137	11.178
																				8.173		8.303		9.653			11.953	9.933	8.466	14.723	8.782			5.42	10.66	7.311	10.84	9.464
																				7.804		8.838		9.366			14.743	8.086	9.77	11.663	12.261			11.255	10.27	8.337	9.117	10.767
																				9.212		9.652		11.358			12.725	8.93	9.157	8.969	11.755			14.494	9.494	9.28	15.608	10.332
																				6.981		9.157		7.184			12.651	7.686	8.974	10.55	11.755			12.893	10.545	9.651	11.457	11.363
																				7.202		8.337		8.173			13.763	9.58	9.704	11.603	11.779			14.25	11.344	7.95	8.726	12.691
																				10.194		1.514		13.546			15.561	7.027	10.842	9.22	15.811			13.759	11.513	11.881	9.494	8.805
																				8.338		9.312		12.878			14.415	8.059	9.704	8.97	15.536			10.525	11.71	8.302	11.988	10.926
																				8.634		7.796		9.873			9.156	10.176	10.547	12.584	10.193			10.228	11.692	5.354	13.463	12.697
																				8.19		9.282		11.955			11.692	11.532	10.841	13.294	11.688			13.206	9.936	9.842	14.646	7.182
																				9.487		8.094		8.466			14.046	13.57	12.262	9.35	14.211			11.759	9.871	8.189	10.315	6.469
																				9.242		8.741		8.399			12.33	9.77	8.466	7.889	11.135			13.053	7.571	9.769	15.174	10.626
																				8.838		10.518		12.122			14.088	8.998	12.209	15.406	10.607			12.19	14.39	9.936	13.028	9.085
																				10.848		10.444		10.194			14.627	12.697	9.031	14.49	8.911			11.082	10.443	9.164	13.253	12.331
																				9.578		10.842		7.987			15.409	11.888	9.909	13.252	14.768			9.554	10.899	11.293	14.32	10.221
																				7.904		7.515		12.939			14.782	15.28	8.975	11.572	10.715			8.048	9.486	12.12	16.172	11.388
																				7.609		9.77		11.006			13.184	13.481	11.388	12.176	10.688			15.686	9.486	13.717	8.808	6.814
																				8.338		10.662		12.488			13.716	12.079	7.805	9.106	12.699			12.19	17.646	14.405	12.082	11.185
																				8.508		10.526		13.3			11.056	13.481	6.446	11.365	10.471			12.36	15.958	11.255	8.871	5.778
																				7.272		9.822		8.508			11.036	11.889	13.142	9.78	12.959			9.994	11.832	7.804	9.705	8.021
																				11.082		9.149		14.877			12.377	9.872	11.44	7.631	12.873			13.633	11.953	7.514	13.024	15.447
																				11.057		8.19		14.136			11.363	9.495	10.871	9.495	11.779			10.498	10.001	6.424	18.456	6.435
																				10.023		9.102		13.901			12.538	16.173	11.851	9.669	11.514			10.186	14.23	9.842	9.675	12.876
																				8.715		8.303		7.722			13.036	11.881	10.438	11.702	10.299			12.231	13.037	11.826	7.725	8.91
																				9.095		8.641		12.699			10.394	9.494	6.778	7.027	9.465			9.464	9.117	12.584	13.948	11.938
																				7.572		5.301		11.973			11.686	11.743	9.934	8.888	11.024			11.759	15.917	6.513	14.732	14.546
																				7.96		8.782		9.405			12.532	11.693	9.653	7.989	12.36			11.255	11.388	10.606	14.84	14.7
																				9.578		9.118		9.873			10.84	17.668	8.561	9.22	10.547			9.242	12.584	9.349	14.136	11.434
																				7.878		7.805		9.844			11.388	17.677	10.847	7.208	11.887			9.372	13.222	9.28	11.322	13.666
																				7.283		8.155		12.699			11.21	14.055	11.919	9.611	8.838			6.772	11.513	9.82	9.507	9.218
																				6.826		7.184		12.286			10.84	12.326	13.077	9.99	12.026			9.732	13.899	8.91	10.177	10.193
																				8.74		7.312		7.722			15.903	13.396	9.366	9.229	11.888			7.959	15.279	8.328	9.86	8.465
																				10.187		9.465		13.418			13.249	11.057	9.488	14.727	12.191			9.908	8.465	13.249	11.739	11.918
																				8.269		8.19		10.341			14.84	9.365	7.233	11.247	11.694			12.893	10.707	8.829	9.734	10.935
																				7.042		9.282		8.542			12.892	8.633	11.057	11.298	9.473			8.053	9.486	7.072	10.616	9.67
																				6.612		6.47		10.662			15.759	9.495	10.137	15.14	9.578			4.914	17.561	7.543	15.078	15.114
																				8.035		8.338		8.466			11.293	12.533	8.806	13.552	9.77			12.056	16.256	11.037	17.085	13.919
																				7.35		7.805		6.436			10.227	13.25	8.541	12.9	10.186			5.766	12.19	6.824	9.37	6.944
																				7.042		7.233		5.628			13.394	12.77	11.515	16.702	11.082			13.222	13.378	10.667	13.866	10.06
																				7.042		7.496		6.163			10.524	16.424	8.466	17.275	10.709			8.154	13.96	11.293	10.883	12.77
																				6.448		10.251		7.351			11.692	11.663	9.093	10.229	8.975			12.36	12.809	6.513	11.94	8.715
																				10.299		6.536		7.572			10.524	10.626	8.337	10.412	9.908				12.208	10.84	12.586	12.584
																				9.697		6.825		9.282			10.518	13.418	10.984	12.831	12.607				11.14	9.651	11.347	13.335
																				11.858		6.105		8.304			9.531	9.351	8.914	10.616	10.707			13.222	13.899	11.056	11.15	6.856
																				10.445		8.303		7.458			12.119	12.314	8.518	12.361	11.459			14.898	11.133	10.707	12.617	6.435
																				13.186		8.74		11.142			7.803	9.733	11.11	10.976	12.726			12.064	12.959	9.494	17.61	10.101
																				8.716		8.38					9.092	11.588	11.297	14.09	11.514			9.842	18.233	5.778	15.934	9.156
																				10.722		9.157					9.842	10.707	11.852	8.297	14.564			13.59	15.521	6.611	11.171	7.986
																				11.415		4.921		9.995			15.525	12.95	11.623	11.561	9.822			9.392	9.842	5.877	15.014	7.58
																				11.038		8.102		13.771			17.466	7.143	12.198	13.072	11.388			10.948	12.871	11.363	9.653	11.356
																				9.697		9.995		10.567			11.79	11.882	9.996	11.18	13.57			14.947	9.148	11.363	13.055	9.936
																				12.379		8.337		9.918			11.023	11.583	7.804	9.031	11.827			9.955	14.763	9.311	10.34	12.377
																				11.398		9.311		14.718			8.465	10.187	9.276	11.827	11.212			15.194	13.888	7.665	12.949	11.581
																				10.643		10.417		11.882			14.173	9.703	4.969	11.006	12.327			13.527	14.841	6.469	14.23	11.356
																				8.899		9.873		10.595			12.325	11.791	9.948	18.143	8.173			12.252	16.295	10.525	14.055	12.284
																				10.842		9.584		8.641			9.695	11.134	9.937	8.838	11.827			14.769	16.435	8.465	14.012	8.974
																				10.396		8.716		10.506			12.024	11.851	9.156	14.613	11.663			10.957	15.26	8.582	15.26	9.211
																				11.92		7.582		10.376			9.936	14.011	5.344	16.401	6.612			13.555	13.124	9.349	13.293	9.28
																				8.508		10.334		11.693			15.921	16.062	7.373	15.197	8.094			14.99	14.464	9.164	12.049	9.148
																				9.573		7.906		10.096			9.651	13.544	9.352	12.919	10.608			12.701	13.712	8.715	13.961	13.184
																				12.422		9.577		11.336			8.405	11.357	9.085	8.166	12.049			12.135	10.559	9.82	12.22	11.494
																				11.417		10.66		10.652			8.805	14.511	11.614	12.187	7.878			12.497	10.193	10.525	10.284	12.635
																				9.701		9.365		10.425			13.898	16.105	10.519	12.585	10.842			13.937	14.563	13.244	12.719	10.395
																				10.576		7.657		11.203			10.023	13.384	12.601	17.913	7.467			9.846	12.377	6.74	11.388	12.031
																				10.049		11.365		11.406			8.328	7.618	12.232	9.024	8.022			14.285	10.847	8.302	8.998	8.465
																				11.914		8.312		6.791			11.133	16.062	10.978	11.514	9.704			10.248	13.053	9.577	14.007	8.862
																				8.954		10.26		8.574			11.334	7.457	10.626	13.249	11.345			11.342	12.921	6.3	10.396	6.949
																				10.616		8.303		7.576			9.942	12.379	10.519	12.517	12.032			12.053	11.037	10.001	8.364	10.606
																				7.631		8.465		9.595			12.532	9.872	14.21	12.449	11.858			12.064	10.298	10.667	11.142	12.114
																				7.156		8.312		11.209			11.971	11.134	13.245	12.704	9.696			8.48	11.236	9.117	7.61	11.133
																				7.908		10.518		12.873			14.563	8.935	11.851	8.837	12.169			16.312	11.662	6.435	11.882	8.54
																				13.313		6.708		9.019			12.898	9.311	9.697	12.13	8.086			10.35	12.486	13.075	9.96	8.739
																				11.562		8.406		9.501			7.688	8.172	10.599	12.442	8.977			9.141	10.714	10.667	15.229	12.135
																				10.472		9.871		8.92			9.673	10.979	9.101	10.175	8.128			12.053	13.384	9.403	11.827	14.899
																				10.689		6.824		6.945			15.363	5.766	10.769	13.295	9.118			8.923	13.862	9.577	16.906	10.714
																				7.796		9.703		9.501			9.603	9.77	10.285	10.186	7.501			8.614	13.816	9.117	15.154	8.862
																				6.966		9.148		11.019			13.741	7.656	14.745	10.828	11.11			8.389	10.284	8.998	12.628	11.363
																				9.284		7.721		13.592			11.342	8.715	6.95	13.077	10.454			10.173	7.571	10.228	9.101	9.532
																				9.817		6.857		9.366			16.128	8.362	12.499	11.038	7.285			10.35	12.871	8.715	10.761	9.871
																				10.603		7.543		8.333			12.181	11.445	10.285	12.032	9.048			12.307	15.316	7.072	9.873	8.311
																				9.473		8.998		9.661			11.069	8.83	8.633	9.385	7.405			10.136	9.242	9.577	13.53	9.03
																				9.496		5.301		11.106			8.139	13.78	9.165	9.989				11.255	8.974	9.464	11.973	9.093
																				11.295		8.154		10.109			13.089	19.115	12.402	12.75				11.337	11.057	5.678	16.918	8.172
																				12.419		9.578		7.072			11.13	15.238	7.805	16.022				14.017	16.285	6.435	8.633	12.809
																				10.299		7.95		12.208			8.584	10.298	9.494	14.933	13.591			11.176	15.374	5.079	10.137	8.54
																				8.976		8.329		10.837			12.137	11.779	10.47	9.017	13.074			8.355	15.465	6.057	13.294	8.707
																				11.973		8.465		13.176			10.541	8.83	9.464	7.907	11.133			10.095	16.868	9.554	9.102	10.298
																				9.938		7.805		8.838			11.063	9.937	6.95	7.631	14.249			7.266	15.562	10.525	6.116	8.507
																				15.454		10.193		12.191			10.05	7.272	11.514	6.292	12.809			10.248	17.22	8.805	12.192	9.156
																				12.192		8.716		10.697			10.22	8.328	10.417	10.495	11.363			11.904	11.237	5.925	9.873	9.703
																				11.515		8.19		10.407			11.023	8.337	10.979	9.527	9.957			10.781	14.899	12.532	12.285	8.337
																				9.909		11.363		9.801			12.572	15.261	11.14	11.437	11.513			10.713	14.701	8.465	16.256	10.626
																				9.118		8.269		13.386			12.021	10.92	10.102	10.363	9.554			10.248	12.95	9.554	11.885	8.998
																				11.187		8.839		10.001			12.648	12.208	11.852	10.494	11.003			11.337	13.961	10.298	8.911	9.349
																				11.883		8.102		16.188			10.767	10.395	11.614	11.539	13.763			14.06	16.097	11.971	11.345	10.606
																				11.761		6.425		8.583			11.662	13.444	8.999	7.256	11.74			11.401	12.544	6.824	11.135	8.362
																				6.857		8.19		9.555			15.102	12.209	12.139	13.245	10.854			14.209	13.075	6.069	12.699	9.958
																				9.851		6.47		12.895			11.3	12.699	11.882	13.919	10.614			13.937	10.688	6.104	17.479	8.934
																				10.472		8.19		9.495			14.06	9.829	11.539	13.524	12.322			13.028	13.185	8.974	12.922	10.847
																				11.295		8.155		13.63			12.466	8.155	13.593	9.496	15.126			12.116	10.101	8.641	14.415	11.79
																				11.694		7.204		9.473			12.701	12.326	8.364	18.689	11.783			12.095	14.089	9.117	14.047	7.311
																				8.508		8.935		12.895			16.171	14.069	10.34	15.011	15.351			11.207	12.72	7.571	11.237	8.715
																				6.612		7.351		9.937			12.208	11.581	9.703	7.874	10.898			11.559		6.949	9.994	12.114
																				10.23		7.805		8.173			13.73	9.843	11.344	10.48	6.078			12.14		8.87	9.487	10.082
																				11.365		9.28		13.17			11.88	18.319	9.282	9.488	12.314			10.899	13.528	8.507	9.282	9.584
																				11.446		7.544		13.162			17.066	15.838	11.852	11.084	16.253			13.249	13.781	9.82	12.877	6.611
																				9.22		9.365		7.953			14.672	10.683	12.169	10.518	12.868			11.829	13.888	8.328	15.922	7.571
																				8.023		7.657		5.767			9.422	13.504	7.805	12.139	6.434			9.148	15.971	8.739	10.761	9.218
																				11.852		8.566		7.666			9.255	12.467	11.18	8.839	17.901			7.86	12.031	7.904	12.601	10.626
																				11.212		6.96		9.638			7.427	10.84	11.006	12.073	9.662			12.327	11.887	9.156	16.455	8.974
																				6.448		9.149		8.584			9.8	10.591	9.22	10.761	11.653			12.062	9.651	7.571	12.895	9.372
																				10.417		7.312		9.935			10.347	9.09	12.12	13.185	12.868			13.658	15.001	8.739	11.496	8.934
																				16.425		6.741		7.501			10.057	11.56	9.242	14.765	13.769			12.265	13.222	8.507	14.808	9.211
																				7.805		5.914		10.177			12.032	13.462	15.668	14.227	10.707			12.407	12.515	7.466	15.375	9.03
																				8.806		7.637		6.862			11.864	8.715	11.004	14.391	7.427			15.462	16.332	8.101	8.172	7.272
																				13.17		6.481		7.196			13.411	8.031	9.293	12.95	13.468			19.873	5.986	8.998	12.209	5.38
																				9.697		5.513		14.843			11.457	13.746	11.037	11.459	10.736			13.213	9.816	7.609	8.716	11.532
																				8.806		6.104		11.324			14.135	11.058	11.93	8.094	14.119			9.099	6.475	8.974	9.652	9.372
																				12.923		7.951		8.839			9.855	11.111	11.782	9.873	12.529			13.962	14.983	7.232	10.249	6.98
																				10.23		4.922		7.844			14.017	14.694	9.671	10.444	17.227			13.859	12.582	9.28		9.85
																				11.365		7.986		11.39			13.318	10.44	9.2		12.793			13.028	10.683	11.037		5.766
																				5.878		8.102		9.838			12.376	9.181	8.402		13.489			10.76	11.987	11.759	18.878	7.904
																						6.612		8.889			17.811	11.363	6.838		8.513			13.232	10.204	9.494	14.78	9.994
																						7.823		8.036			15.247	16.187	9.507	13.037	6.662			11.742	12.326	9.292	9.507	8.465
																				10.626		7.657		9.528			16.774	17.564	8.999	14.39	14.531			12.649	12.08	10.84	7.467	8.405
																				13.781		6.104		7.575			15.146	10.716	10.924	14.136	13.162			12.374	11.761	10.74	19.442	8.837
																				10.927		7.987		10.033			15.691	10.563	9.181	13.251	10.722			11.493	11.72	9.554	13.974	14.047
																				13.96		8.634		9.183			10.614	10.41	11.038	8.934	13.562			13.999	9.925	9.936	14.365	11.056
																				10.059		6.267		10.591			10.384	11.175	10.146	12.725	8.052			11.201	14.488	7.665	11.077	10.899
																				11.791		11.737		9.276			13.937	12.034	9.156	10.453	12.779			14.387	15.336	6.243	19.216	11.037
																				12.026		9.996		8.023			10.173	13.366	10.092	13.629	11.6			14.234	13.384	5.628	14.07	11.786
																				11.737		8.976		12.327			12.618	9.931	7.437	10.84	12.681			9.523	13.514	5.354	17.184	9.117
																				9.465		9.996		8.508			13.999	13.632	8.434	13.104	11.821			10.593	13.781	8.805	12.36	10.003
																				10.159		10.299		7.004			11.601	6.593	12.107	15.097	14.637			13.038	11.646	7.571	8.381	9.636
																				10.715		8.584		10.194			14.403	12.306	11.015	13.127	11.742			10.173	10.843	10.298	13.313	8.566
																				12.361		10.986		10.266			10.347	10.643	8.053	16.917	9.659			12.498	14.85	6.824	9.824	10.298
																				10.299		8.673		5.331			10.647	10.376	9.962	15.59	13.413			12.697	12.167	4.316	10.414	8.465
																				8.021		11.559		7.96			9.255	8.054	10.555	16.383	7.888			13.314	11.026	8.03	11.682	8.302
																				15.444		10.628		15.363			12.116	11.265	8.977	16.435	11.069			12.325	10.44	7.721	9.58	8.632
																				10.471		7.572		11.271			12.19	12.303	10.495	12.77	13.161			11.388	12.872	7.272	8.685	8.128
																				11.038		14.009		12.046			11.141	9.373	9.322	16.63	12.139			14.006	11.646	10.158	7.129	11.037
																				10.847		8.094		12.92			9.449	8.228	10.329	12.36	12.43			11.881	11.384	6.824	9.282	9.486
																				12.209		12.327		9.399			15.119	9.745	11.658	10.919	11.968			10.332	12.569	9.871	9.369	15.085
																				14.841		10.194		7.906			9.089	8.381	8.166	13.591	11.201			15.917	12.985	6.104	17.282	14.068
																				13.386		8.567		6.571			15.394	7.707	8.57	10.545	13.089			7.721	14.766	6.708	15.002	13.249
																				8.862		8.032		9.58			13.325	9.697	9.778	10.332	7.663			12.03	11.341	8.805	12.528	9.372
																				16.066		9.556		10.445			10.375	8.303	10.84	11.662	9.8			17.014	15.444	8.632	10.84	10.47
																				14.43		8.716		9.52			14.42	7.067	10.47	15.33	12.681			11.559	10.862	7.609	9.481	12.725
																				11.792		7.768		9.513			10.457	12.852	9.087	13.168	13.723			9.894	8.554	8.337	11.919	9.769
																				13.141		11.025		6.981			13.318	7.283	9.875	12.538	11.175			12.182	8.586	6.424	15.83	9.486
																				9.584		10.23		6.364			13.244	12.34	9.35	9.372	11.872			11.971	9.735	5.913	13.364	13.416
																				12.81		10.285		8.381			12.486	10.657	11.601	8.128	11.633			15.665	11.72	7.112	11.077	6.535
																				12.327		9.533		8.175			14.174	12.874	7.592	16.535	11.968			12.376	14.491	7.112	12.985	10.284
																				12.21		13.719		7.007			16.604	10.194	9.365	14.494	9.819			9.422	10.563	7.041	12.683	7.282
																				10.715		11.238		11.227			7.774	16.097	10.424	13.759	11.789			13.997	13.787	6.824	14.167	9.164
																				10.92		8.269		9.031			12.208	8.734	9.683	13.443	9.349			13.79	9.2	4.316	10.363	7.282
																				11.515		8.049		8.312			9.429	9.471	10.223	17.61	11.255			12.265	12.54	5.313	8.405	5.691
																				11.237		8.129		9.284			12.389	13.572	8.56	18.312	14.724			13.834	11.786	8.715	10.033	10.827
																				11.142		7.987		7.771			11.278	7.45	6.562	11.344	11.513			11.51	10.616	7.192	9.404	7.618
																				12.872		11.358		7.987			12.21	8.808	7.442	14.884	10.524			14.017	13.819	6.3	7.536	10.47
																				15.22		9.157		9.282			9.368	8.053	10.581	11.482	9.148			11.278	15.713	7.232	15.711	10.332
																				11.663		8.466		8.228			11.821	7.927	9.142	12.553	14.627			13.416	13.338	9.156	16.856	8.507
																				11.889		8.238		13.409			9.338	9.584	8.507	15.461	10.79			11.691	9.816	6.622	11.025	10.443
																				11.852		12.851		12.122			11.061	9.351	10.167	15.425	9.643			11.334	6.037	11.759	6.981	9.936
																				9.212		9.212		10.61			7.03	12.534	7.304	11.506	11.312			14.387	15.26	10.626	14.495	10.687
																				12.139		10.696		8.317			12.674	9.199	11.255	15.584	12.307			14.672	10.676	8.337	12.419	11.832
																				11.539		10.187		11.415			12.674	13.551	8.059	8.94	7.111			15.754	9.918	8.021	12.726	10.919
																				10.559		7.184		11.29			8.833	7.314	9.72	14.629	8.93			14.587	10.314	8.302	15.143	12.937
																				9.586		9.212		12.82			12.119	9.512	6.89	17.741	11.601			11.85	7.155	7.041	13.386	11.178
																				12.379		10.842		15.146			8.951	13.682	9.064	13.829	11.957			11.653	12.031		10.334	7.112
																				8.542		8.542		10.247			13.48	11.135	9.571	14.778	9.422			12.932	10.432		16.492	9.365
																				11.662		7.273		10.445			15.085	6.981	7.515	12.293	13.567			13.889	17.953	12.469	14.875	7.232
																				8.364		9.844		9.452			12.977	7.095	8.459	13.546	11.634			12.92	10.495	12.537	13.273	8.405
																				10.547		8.936		8.97			10.713	8.402	6.825	17.577	10.713			10.05	11.741	11.457	12.026	9.577
																				11.256		7.906		9.771			9.709	6.89	12.208	7.898	12.709			12.92	11.038	7.981	17.368	8.632
																				11.255		7.768		10.521			12.428	6.562	10.923	7.165	13.88			12.458	15.077	7.774	14.768	8.405
																				10.173		9.771		7.96			13.356	13.761	9.373	13.492	17.415			10.707	11.694	9.696	14.134	8.021
																				6.981		9.212		10.087			7.675	14.692	9.466	7.874	15.746			13.461	12.602	14.287	9.701	7.804
																				12.584		8.103		8.615			11.387	14.373	7.986	10.608	9.338			12.621	10.498	10.611	12.534	8.311
																				10.396		9.095		9.15			10.095	12.653	7.488	9.646	9.103			12.208	8.362	11.799	15.651	11.85
																				11.415		11.135		8.747			6.057	18.551	6.096	11.206	9.422			10.542	13.143	14.447	7.143	7.571
																				10.601		12.586		14.624			13.385	16.952	6.266	16.24	11.024			12.681	13.316	11.816	9.844	6.824
																				11.212		7.96		13.164			8.461	9.244	7.665	8.476	9.842			9.829	14.43	9.945	13.026	9.936
																				14.176		11.515		12.21			7.924	12.079	8.716	14.27	12.415			16.729	11.135	12.314	11.456	10.926
																				9.653		8.466		10.228			13.21	8.538	8.838	8.551	10.76			10.173	17.726	11.772	9.909	9.148
																				8.715		11.358		7.572			8.614	13.403	7.761	13.065	9.942			14.692	15.978	7.491	10.775	10.667
																				8.302		9.873		5.536			7.427	10.076	9.26	10.223	10.298			8.836	11.212	10.863	8.871	9.577
																				9.674		10.194		15.813			13.807	10.229	7.143	16.999	14.633			10.919	12.209	11.912	9.675	10.08
																				11.006		8.049		13.169			10.457	10.816	6.96	14.052	11.201			9.643	12.653	8.389	11.851	7.721
																				10.194		8.364		13.04			7.107	10.444	8.815	10.265	7.688			11.532	7.951	9.984	16.309	11.832
																				11.294		9.734		9.995			9.62	10.941	7.63	12.137	10.301			11.13	10.334	12.959	16.646	11.344
																				10.687		8.634		13.135			15	10.84	6.882	10.608	9.148			12.769	15.314	10	12.602	10.545
																				16.597		7.351		11.361			9.089	11.014	8.507	13.899	9.932			9.186	10.518	15.961	9.96	9.494
																				10.842		7.515		9.645			12.92	8.709		14.251	8.189			14.242	8.542	11.557	12.121	10.193
																				10.769		8.466		11.646			10.934	11.079		16.951	9.307			10.76	13.633	12.868	12.772	9.311
																				13.723		7.351		12.62			11.266	12.152		10.306	9.696			11.244	9.703	11.521	13.818	9.651
																				10.152		7.987		10.109			8.595	10.194	15.062	12.408	12.376			9.483	13.026	9.54	14.784	8.465
																				10.865		9.243		9.918			9.741	15.163	13.224	11.185	10.347			8.483	11.156	10.887	12.895	8.337
																				11.246		7.458		9.645			12.14	9.704	12.427	14.308	9.286			10.22	15.343	11.255	11.005	11.004
																				12.307		9.586		11.288			9.709	12.95	10.374	12.505	9.523			11.018	11.94	9.62	13.038	8.934
																				11.634		6.981		8.364			13.73	10.688	13.678	12.872	8.08			10.47	14.378	11.13	11.663	13.712
																				11.611		8.103		13.651			11.107	10.193	7.571	16.222	13.347			8.898	13.011	12.127	16.453	11.413
																				9.394		8.584		10.927			7.111	10.417	12.324	10.582	12.771			11.058	14.59	8.829	15.562	10.84
																				12.181		8.936		11.635			12.868	8.268	10.295	15.83	9.894			11.651	14.06	11.359	12.187	10.774
																				8.049		6.612		8.218			13.162	9.28	11.003	14.446	8.833			11.753	16.038	10.539	12.499	8.362
																				10.674		5.986		9.461			7.592	11.005	10.647	13.083	9.513			10.722	13.555	8.987	10.048	9.349
																				8.081		7.467		8.791			7.227	9.101	12.53	12.314	10.375			12.573	11.741	11.087	12.717	12.876
																				11.495		8.831		11.583			7.721	9.872	12.021	16.088	10.713			15.259	13.816	11.669	11.09	8.337
																				10.376		8.806		9.366			9.266	11.256	9.8	6.461	11.255			11.904	11.603	10.136	8.38	7.986
																				10.211		11.244		8.634			10.84	10.444	15.35	10.355	13.96			11.772	10.682	8.815	9.843	11.753
																				11.514		10.715		9.896			8.64	12.894	10.076	14.485	13.174			9.486	12.449	12.156	11.014	14.975
																				10.347		9.996		14.11			10.855	15.374	10.647	8.649	10.995			13.901	11.398	12.307	12.303	10.193
																				9.12		13.386		11.581			11.579	9.28	9.54	11.769	6.795			14.033	10.792	10.852	12.95	9.494
																				9.664		7.951		11.611			8.962	13.722	13.334	15.204	14.754			14.672	13.365	10	11.827	10.76
																				9.117		9.102		9.048			11.368	9.494	12.486	10.989	11.634			15.096	10.48	10.145	10.5	5.913
																				12.389		11.084		10.278			11.968	14.978	14.188	14.965	10.101			17.384	10.79	10.248	10.836	7.35
																				10.098		8.338		10.298			11.783	13.3	12.304	13.993	13.712			14.153	7.77	10.781	10.238	11.255
																				9.379		8.156		7.139			10.186	15.453	11.556	7.404	11.236			9.932	9.908	10	10.792	12.284
																				9.366		8.191		8.481			9.46	11.243	10.047	9.844	15.521			17.859	11.037	10.019	9.314	13.292
																				11.864		9.366		7.35			9.378	16.106	11.2	11.858	14.543			11.772	8.246	10.101	11.953	12.921
																				12.977		8.542		8.816			10.602	15.317	9.255	14.842	16.759			13.249	11.357	10.713	9.611
																				11.829		8.708		9.611			12.681	13.545	8.355	13.336	13.168			11.404	10.657	12.197	11.634
																				13.665		8.839		6.233			10.301	15.13	12.375	13.764	16.069			10.009	11.986	9.5	8.899	9.28
																				10.874		7.96		7.504			12.197	10.841	7.675	11.175	15.818			14.153	11.459	12.466	10.863	8.45
																				8.626		8.129		9.661			8.08	11.135	10.301	7.614	10.626			15.981	12.056	9.61	13.705	8.211
																				8.127		9.653		8.19			11.255	10.172	11.129	8.349	15.142			12.991	13.099	11.816	10.033	9.093
																				11.994		9		9.71			8.876	8.741	9.916	9.701	11.612			11.207	11.546	10.737	11.024	9.859
																				11.339		8.094		11.089			12.573	9.494	9.14	11.014	16.604			10	13.546	10	10.298	8.951
																				12.211		7.666		14.95			7.107	10.841	12.417	12.111	16.883			16.606	9.646	8.923	4.968	17.239
																				11.785		7.987		9.187			9.659	10.714	10.175	9.507	18.233			10.22	12.496	11.342	9.661	12.53
																				12.882		9.15		9.009			10.35	9.937	7.306	14.26	11.255			12.486	12.274	12.242	9.089	10.396
																				10.856		7.184		9.818			5.512	9.909	12.966	11.028	9.349			12.119	12.391	9.255	9.77	13.712
																				9.09		9.578		12.181			10.84	9.465	13.13	11.683	9.532			14.515	13.29	11.096	14.431	11.579
																				11.894		8.863		9.994			11.936	10.158	12.079	12.797	11.185			12.961	7.365	9.486	10.98	15.534
																				9.351		8.278		11.302			13.075	12.811	12.966	13.462	14.415			12.939	8.769	12.208	9.937	15.218
																				9.484		8.304		11.646			15.33	12.139	9.494	14.596	14.006			11.056	9.398	8.836	7.843	11.421
																				9.896		8.191		10.312			13.883	13.224	10.439	13.074	14.088			10.119	10.059	11.342	5.493	14.526
																				8.703		8.634		8.139			15.311	11.558	12.528	11.39	10.66			14.828	9.282	10.781	9.398	10.855
																				10.406		8.936		11.635			13.888	12.22	8.593	16.789	9.85			9.962	5.941	12.021	12.478	13.241
																				10.996		7.61		6.141			10.767	12.727	10.327	16.284	15.686			9.071	8.873	10.746	10.98	12.242
																				10.923		9.465		10.158			13.512	11.827	13.862	15.029	12.072			14.78	13.899	8.389	10.329	9.855
																				8.633		8.508		11.109			13.68	8.929	11.936	10.842	15.562			12.377	9.464	9.029	8.296	11.581
																				11.279		8.049		10.571			11.255	11.206	10.228	12.419	12.697			9.04	6.448	8.58	8.297	13.59
																				9.339		8.839		10.136			13.298	11.341	10.987	10.595	17.658			13.629	8.519	9.117	11.51	14.65
																				10.298		7.906		9.281			12.848	9.482	12.339	9.948	15.813			6.57	10.66	11.255	9.143	14.639
																				11.256		7.96		9.605			16.9	10.452	9.801	10.922	13.816			11.858	11.237	9.286	7.67	13.658
																				9.817		7.572		11.444			10.72	13.017	11.777	14.467	7.282			8.978	8.38	9.422	10.159	9.696
																				11.179		5.792		10.101			12.691	11.682	8.888	13.682	18.901			9.577	11.496	6.888	8.401	9.741
																				10.648		8.023		11.817			12.921	9.905	10.697	13.251	11.21			10.033	10.298	9.603	10.955	6.104
																				10.125		7.273		12.141			9.85	13.41	13.12	9.668	14.937			7.952	11.694	11.07	16.174	9.61
																				9.339		6.105		9.83			14.052	10.425	11.85	17.649	14.134			11.182	11.76	11.904	14.367	16.064
																				6.931		8.338		11.821			13.512	7.404	11.395	17.913	16.725			13.946	15.311	9.036	14.978	11.936
																				8.14		10.669		8.83			8.998	8.086	12.697	11.39	11.753			10.119	13.759	8.584	16.852	12.881
																				11.15		10.445		10.277			13.675	7.564	11.269	10.147	7.192			11.242	13.336	9.923	14.783	8.389
																				11.384		9.96		8.14			14.489	10.238	11.597	13.471	10.228			14.255	15.851	8.779	11.751	10.375
																				10.613		9.313		11.679			12.22	8.337	9.974	12.039	11.14			13.946	15.331	9.029	11.973	11.004
																				9.122		8.584		12.181			12.532	10.44	12.955	14.976	13.168			11.601	15.82	9.061	12.562	11.457
																				7.126		8.741		15.918			12.584	9.558	13.55	13.922	10.774			8.484	12.95	12.242	12.408	10.395
																				8.19		7.805		12.773			9.908	13.235	9.771	15.783	9.651			11.557	12.811	5.27	8.977	12.498
																				10.613		7.987		14.685			13.929	9.487	9.292	17.662	9.936			12.921	13.718	8.111	12.096	13.328
																				10.086		7.796		9.611			10.926	10.307	8.006	15.958	12.876			12.876	11.038	8.189	14.646	12.19
																				11.302		10.194		8.892			10.919	9.065	5.535	12.536	11.004			11.735	12.653	9.279	9.339	12.649
																				9.431		8.806		12.772			15.128	10.246	12.979	13.975	13.206			16.172	15.597	8.632	14.978	10.151
																				10.077		6.95		12.973			12.486	9.908	10.924	12.444	18.626			15.649	9.494	10.276	11.057	13.094
																				15.016		12.939		9.104			16.282	11.175	9.21	16.495	13.96			12.77	12.114	10.76	12.239	8.22
																				8.863		9.118		13.265			11.133	11.741	9.673	16.012	14.365			15.854	14.027	13.742	9.495	8.962
																				11.18		9.996		10.888			13.591	9.653	11.15	8.202	14.405			12.078	10.628	13.225	12.488	10.405
																				14.916		10.709		15.314			13.141	10.989	11.521	13.643	13.675			12.697	10.34	12.252	11.533	11.821
																				12.08		5.628		10.049			12.584	10.444	10.21	12.48	13.764			12.4	13.883	14.7		12.794
																				9.496		6.981		10.626			12.072	9.252	11.826	12.45	13.96			12.22	12.079	10.405		11.061
																				10.445		7.582		9.938			14.39	7.706	8.11	11.955	14.052			16.172	13.962	11.997		11.07
																				10.709		7.796		14.026			9.211	8.45	10.085	14.05	21.313			14.415	13.786	9.855		8.02
																				9.873		6.826		9.048			10.47	9.415	11.531	11.86	14.33			10.626	12.894	11.872		12.208
																				9.705				10.407			8.311	7.373	8.876	16.594	12.937			14.415	14.725	10.722		12.307
																				9.465				10.616			10.599	7.282	7.336	9.276	16.185			8.649	16.593	14.119		13.776
																				14.916		8.08		10.783			13.378	7.665	8.324	9.284	13.717			9.936	16.059	10.713		11.783
																				11.346		8.702		9.74			12.861	13.068	9.255	16.954	14.225			12.606	11.037	12.659		12.218
																				8.782		8.93		11.852			18.62	8.561	10.207	15.597	14.627			14.913	10.194	8.595		12.307
																				12.951		9.802		14.648			18.072	10.791	9.576	13.121	13.053			9.908	13.244	12.417		10.611
																				11.038		9.846		11.959			8.483	8.97	6.98	10.669	20.456			10.35	6.436	11.081		9.338
																				9.366		9.801		9.674			8.03	7.77	7.675	15.428	16.604			10.957	15.261	11.337		10.375
																				12.263		8.634		10.9			15.028	9.995	10.346	10.419	11.024			12.927	14.211	11.201		24.79
																				11.54		10.651		8.018			13.965	9.877	9.748	16.633	22.555			10.457	13.055	11.038		12.325
																				9.996		11.097		16.243			12.325	6.163	11.772	13.821	15.011			12.497	16.423	7.638		7.142
																				12.098		9.104		10.398			9.908	9.311	12.116	10.669	13.499			11.612	9.995	14.812		13.232
																				11.889		6.31		9.288			11.612	9.744	7.791	13.552	12.307			13.21	14.783	7.86		11.081
																				7.906		8.345		8.39			13.543	11.46	13.104	10.829	15.59			13.028	12.098	10.375		18.024
																				10.334		12.96		7.902			15.608	10.514	13.489	10.658	11.21			9.378	11.257	11.269		14.065
																				7.666		10.897		11.072			10.978	12.392	13.88	10.684	13.432			13.527	11.057	10.569		15.259
																				13.208		12.869		7.902			12.04	12.232	13.454	10.547	12.659			10.35	13.141	8.332		11.88
																				9.351		10.873		7.902			11.989	13.883	11.666	14.35	14.349			16.597	12.517	13.999		16.687
																				13.208		9.994		9.925			19.551	13.718	11.612	14.467	11.666			12.861	11.532	12.182		6.187
																				8.741		9.61		13.903			11.401	12.697	14.821	9.351	10.602			12.868	10.606	11.625		13.282
																				11.446		9.183		10.628			16.643	13.759	10.173	10.441	10.123			18.17	11.293	10.674		14.639
																				9		7.113		7			8.362	14.702	13.249	8.65	13.325			13.686	8.74	11.707		12.208
																				8.129		8.172		7.706			13.751	9.696	9.673	14.198	7.92			12.045	9.822	11.633		10.925
																				13.381		8.356		7.32			12.325	4.819	6.706	15.071	11.412			9.636	9.117	11.356		13.714
																				8.049		7.909		8.791			12.085	12.894	10.713	11.324	9.12			9.817	12.079	15.915		9.473
																				9.496		12.403		7.61			13.887	10.841	9.8	10.724	8.923			9.399	11.345	10.356		8.154
																				12.534		9.095		10.376			13.88	9.871	9.751	12.92	8.595			11.767	9.873	13.277		10.457
																				9.465		7.734		7.564			10.707	14.491	12.741	14.912	12.497			8.559	13.427	8.951		9.663
																				13.224		7.805		9.038			9.593	16.173	11.653	17.085	13.089			12.231	9.467	9.8		9.145
																				9.465		12.684		9.501			11.342	9.77	11.412	15.889	10.626			15.91	10.863	10.248		9.855
																				12.699		9.049		7.424			12.868	16.735	9.31	11.59	12.881			14.585	10.103	10.695		11.286
																				11.446		9.963		8.148			11.471	12.872	11.244	15.408	13.901			10.616	9.465	11.07		7.174
																				10.173		11.295		8.093			13.992	14.702	9.211	17.186	11.3			13.406	10.01	9.945		8.595
																				10.927		7.926		6.567			7.358	12.811	7.336	12.802	11.634			9.72	13.038	6.79		10.009
																				11.038		10.454		8.081			9.46	12.285	10.347	25.744	8.584			9.837	9.471	8.962		10.539
																				9.465		9.721		8.022			12.977	7.95	10.746	14.253	7.675			12.973	15.397	11.581		8.146
																				10.299		6.084		10.222			10.295	9.156	10.211	15.82	10.359			10.175	13.476	13.397		11.885
																				7.439		8.247		11.959			10.448	11.761	11.024	12.962	9.46			9.932	15.416	10.957		13.249
																				11.559		8.979		10.532			16.254	9.373	10.899		11.644			9.61	13.571	11.356		13.162
																				8.976		8.297		7.982			9.62	9.69	11.178		10.384			12.095	15.069	11.953		15.795
																				12.074		7.558		8.541			13.028	8.311	13.562		10.566			9.368	12.311	11.547		11.401
																				10.608		9.087		8.425			12.182	9.655	16.224		12.466			8.22	14.197	9.66		9.577
																				11.792		8.57		11.089			10.22	7.423	13.723		9.871			9.513	8.228	10.83		9.341
																				10.547		9.758		7.219			10.542	12.449	12.458		9.942			10.957	11.435	14.069		10.707
																				14.029		8.65		8.303			13.435	8.508	12.466		13.63			11.356	12.877	10.835		14.543
																				7.96		10.427		8.626			8.789	10.415	9.46		9.368			12.739	11.554	12.239		8.749
																				11.496		8.621		11.495			15.74	8.173	9.894		8.702			11.13	13.666	13.956		12.821
																				10.472		9.838		10.88			11.912		11.968		13.028			8.93	10.751	15.531		10.457
																				9.829		7.5		8.791			8.962		7.9		9.117			10.542	14.815	15.527		12.085
																				8.103		8.805		8.333			10.872		12.53		11.15			13.489	13.53	13.641		12.53
																				8.741		7.734		9.645			8.923	11.515	11.081		9.593			9.117	10.52	20.26		8.332
																				14.055		7.96		7.593			13.413	11.005	13.723		10.948			12.937	10.791	10.193		15.608
																				10.299		7.366		8.816			11.426	13.651	10.396		15.72			13.658	12.044	13.492		11.312
																				9.556		7.971		10.147			12.389	12.402	13.772		13.649			11.356	14.886	11.396		12.417
																				12.233		6.765		10.376			11.018	7.795	8.89		12.761			15.278	12.868	8.898		15.679
																				9		6.18		15.92			10.948	6.436	8.465		14.698			17.479	11.854	8.191		12.932
																				12.05		7.61		9.15			13.277	7.986	12.032		14.949			14.294	10.328	12.03		16.75
																				8.269		7.852		14.035			8.404	11.791	12.851		10.969			10.647	10.537	11.435		11.244
																				9.243		9.801		9.873			9.593	13.072	8.691		11.412			11.368	12.039	18.55		6.998
																				11.384		9.281		10.162			10.602	12.498	12.374		10.872			10.84	7.216	11.25		12.307
																				12.586		9.637		11.581			11.741	11.364	8.89		9.172			12.19	10.757	10.707		13.468
																				9.873		9.187		11.744			10.339	16.38	9.429		10.872			11.556	14.558	9.989		8.713
																				12.654		10.334		10.001			10.443	15.331	9.378		12.366			12.03	7.631	13.755		12.265
																				7.582		12.53		8.485			9.593	10.334	10.934		9.871			11.759	12.569	11.791		9.145
																				10.334		13.41		13.091			12.876	10.194	8.434		8.847			12.651	8.218	10.926		13.77
																				10.25		11.859		9.488			10.84	10.607	7.981		15.363			12.537	12.873	12.717		13.356
																				9.985		9.138		10.299			12.4	10.662	8.465		11.107			14.415	11.971	7.621		12.116
																				11.18		9.795		11.863			16.069	7.666	10.359		8.702			16.949	10.495	10.362		9.643
																				12.643		12.341		15.249			14.21	10.285	9.145		12.127			13.653	13.676	10.158		12.991
																				13.106		10.832		12.371			12.025	9.586	12.116		12.871			13.221	10.37	13.92		11.764
																				7.337		11.131		11.403			11.513	5.301	12.53		12.794			12.048	11.245	12.704		10.375
																				6.945		9.243		11.823			11.457	7.272	11.912		10.695			12.492	11.246	11.36		8.89
																				9.821		11.59		7.853			11.532	7.143	12.871		10.855			12.92	10.682	10.244		9.54
																				7.89		11.208		9.188			10.899	8.094	11.653		10.922			12.072	7.825	9.292		11.176
																				6.669		9.513		11.97			11.85	12.402	7.474		13.133			9.218	12.829	10.033		10.611
																				8.329		12.192		10.532			11.293	11.852	10.173		10.076			13.721	10.735	11.948		9.368
																				9.451		10.792		11.495			11.532	14.863	9.5		9.942			16.434	11.846	7.105		16.925
																				9.101		8.338		10.739			9.651	12.121	8.632		8.267			12.606	12.003	20.492		10.136
																				10.857		14.354		11.895			12.4	12.023	9.279		12.307			11.388	10.896	9.947		7.571
																				9.595		6.189		11.02			9.311	9.772	10.65		8.76			12.948	14.248	14.068		10.173
																				9.101		11.46		13.072			15.813	11.315	14.334		8.922			13.633	10.513	8.503		7.111
																				10.175		9.58		11.635			12.096	10.049	14.858		11.764			12.583	12.494	10.362		11.815
																				11.358		10.439		10.087			13.717	11.949	13.797		14.153			8.267	11.038	14.556		11.038
																				10.386		10.357		9.366			12.809	12.975	9.186		12.871			12.417	11.817	10.033		10.248
																				8.863		9.399		8.931			12.377	9.586	11.038		13.277			13.053	10.657	10.186		10.173
																				9.844		7.114		7.424			11.344	6.981	12.881		9.816			14.768	12.894	10.497		11.061
																				6.315		10.817		14.467			9.842	10.717	10.934		15.904			14.249	13.787	8.218		8.174
																				8.364		9.106		11.152			14.083	9.772	10.614		12.515			11.97	9.464	8.268		5.628
																				12.181		11.673		10.299			13.009	12.8	7.884		10.375			12.33	12.872	14.861		5.197
																				9.821		9.55		15.147			11.255	13.864	8.919		11.634			13.14	9.283	7.879		7.658
																				9.15		10.294		10.499			10.84	12.8	10.173		18.424			9.364	11.887	6.98		9.156
																				6		10.238		15.281			11.832	12.056	8.359		11.691			10.22	12.039	6.98		9.765
																				10.386		10.684		9.525			12.031	11.769	7.111		9.673			12.03	12.962	10.06		5.88
																				10.471		7.771		11.428			9.994	11.025	7.981		14.017			13.649	13.676	12.162		5.235
																				11.389		8.899		8.863			10.72	14.342	10.707		13.356			12.377	14.842	16.118		5.489
																				8.924		9.401		10.652			10.978	15.22	8.76		9.338			14.622	17.016	11.737		5.889
																				9.96		8.899		9.621			10.847	12.386	6.819		14.341			8.336	16.142	12.258		12.546
																				8.597		8.173		13.463			12.691	12.564	6.207		9.603			11.97	11.186	10.362		11.025
																				10.147		8.571		7.593			11.413	9.37	12.327		12.304			10.193	15.015	10.453		10.767
																				5.204		11.95		8.715			9.494	8.993	6.384		7.457			12.137	12.116	10.133		11.358
																				9.343		12.546		10.109			13.722	8.999	10.393		10.569			11.832	14.848	14.216		10.223
																				12.772		9.138		17.387			17.856	13.402	13.807		11.141			5.691	15.166	14.297		13.124
																				13.282		10.177		10.959			12.532	10.285	10.448		13.649			9.28	12.961	8.815		10.209
																				12.871		11.111		9.802			13.378	7.989	9.5		10.136			11.255	14.613	8.872		11.206
																				10.896		14.417		11.581			15.076	8.247	12.95		12.458			11.055	11.972	12.119		10.06
																				9.422		8.978		10.296			14.494	7.116	9.259		7.675			9.085	15.526	13.255		11.581
																				11.403		10.981		10.103			11.21	12.285	11.176		13.96			12.33	11.755	10.332		14.294
																				9.177		7.926		10.792			12.137	8.716	14.263		11.893			7.795	13.677	9.673		12.991
																				11.536		7.908		13.809			12.331	11.46	7.688		13.807			6.116	16.173	10.894		10.647
																				10.376		7.631		10.471			15.218	11.514	9.593		10.359			19.306	19.158	10.412		10.614
																				10.376		7.641		8.218			17.45	16.555	4.854		10.095			10.47	14.991	10.187		12.649
																				10.601		7.594		10.407			13.649	11.663	8.267		13.73			11.388	16.332	7.538		9.709
																				11.693		10.23		10.147			13.244	9.102	14.033		9.099			13.628	15.564	8.829		15.33
																				11.864		9.065		12.781			9.471	12.073	10.22		15.194			10.001	10.775	10.249		10.506
																				11.18		12.022		8.78			11.588	11.561	10.995		13.555			10.925	12.95	10.494		10.396
																				8.364		7.373		9.664			9.532	13.129	7.827		16.91			13.27	10.828	10.332		9.871
																				8.571		9.278		11.744			16.069	12.117	8.111		11.579			11.444	12.073	8.407		8.328
																				8.053		10.097		11.994			8.91	10.194	8.76		14.99			10.687	12.856	7.003		12.369
																				11.287		8.219		9.934			13.96	12.239	10.136		11.176			12.948	11.955	11.269		10.384
																				10.648		9.873		8.963			8.829	9.616	10.855		10.393			12.452	15.608	8.992		13.356
																				9.611		8.716		9.461			11.662	8.247	12.709		12.659			12.486	9.844	11.182		11.387
																				9.818		11.5		9.555			11.004	10.56	10.71		7.284			10.249	12.377	15.26		10.737
																				11.21		7.196		9.753			11.133	10.85	13.432		10.731			11.236	11.515	15.011		12.821
																				9.674		7.971		10.058			11.082	8.716	7.336		12.56			8.189	12.12	12.078		10.22
																				8.585		8.297		12.129			10.667	10.01	9.62		12.871			11.893	14.875	12.584		11.356
																				10.711		9.102		12.935			9.349	12.8	10.957		13.318			14.563	11.134	14.024		14.683
																				8.924		9.157		10.839			11.735	11.117	11.435		14.189			11.3	14.19	11.998		15.495
																				12.683		9.322		9.308			7.35	10.687	9.429		10.922			11.13	11.457	8.91		12.179
																				8.945		8.594		15.486			12.948	7.96	11.446		11.612			9.659	10.761	4.656		10.65
																				11.635		9.507		10.747			7.665	13.865	11.928		19.334			11.087	9.366	6.882		11.732
																				13.443		11.622		12.378			13.026	11.36	11.201		12.182			19.195	11.882	11.371		8.016
																				13.214		9.399		9.312			11.255	12.391	10.145		14.715			11.928	10.761	12.486		12.077
																				10.433		8.072		12.534			10.058	10.955	7.692		14.607			12.415	8.303	13.44		10.469
																				7.693		7.422		11.089			9.372	14.186	12.208		14.088			13.116	13.38	13.66		9.748
																				11.004		10.496		10.649			8.507	12.353	13.637		18.06			12.621	14.465	10.047		10.626
																				10.856		10.076		9.257			10.606	10.804	11.51		14.462			12.977	12.949	9.5		12.55
																				9.946		6.945		9.873			13.053	9.696	10		14.898			12.208	15	12.893		13.378
																				7.458		10.119		5.756			12.377	8.953	8.919		17.459			12.641	12.314	13.241		14.06
																				10.152		9.345		12.324			11.056	9.025	11.435		9.984			10.375	12.5	8.951		10.899
																				10.697		10.097		11.358			13.026	11.732	10.934		14.845			10.405	10.519	9.186		15.347
																				12.139		7.706		9.802			11.293	12.274	7.474		8.016			10.384	10.901	10.173		11.435
																				8.633		10.739		11.97			13.119	9.816	9.61		15.961			10	9.872	11.707		14.447
																				8.761		11.058		12.244			11.134	9.421	9.486		13.378			11.864	10.827	11.061		9.365
																				13.68		9.22		7.428			15.316	11.298	10.123		19.641			14.078	8.999	10.599		9.089
																				9.83		10.662		8.466			10.76	7.733	12.848		10.405			8.833	11.025	12.281		11.885
																				8.952		7.725		8.597			12.893	16.468	9.829		16.778			11.426	12.585	10.855		14.387
																				7.572		8.586		7.337			8.74	14.575	8.76		14.44			12.242	11.858	12.55		10.31
																				9.946		7.393		7.04			9.732	10.035	9.368		8.923			12.032	11.257	10.65		9.186
																				9.895		9.96		7.018			13.628	8.102	10.722		10.08			12.628	11.363	9.029		7.266
																				8.93		7.615		8.834			8.048	13.384	11.178		10.934			10.737	12.031	12.628		11.387
																				9.856		6.406		8.402			8.405	10.251	9.855		13.413			8.569	11.345	11.156		7.795
																				7.743		8.611		9.15			11.14	9.734	8.216		9.894			8.922	16.332	11.404		11.971
																				8.425		8.149		10.275			9.908	11.583	9.117		9.741			12.307	11.612	11.244		9.8
																				9.488		7.283		5.644			11.887	9.909	8.614		12.064			10.35	6.347	11.056		13.174
																				10.159		10.012		5.644			11.513	10.284	8.139		7.888			11.893	10.158	11.201		12.53
																				14.447		10.662		10.109			12.078	9.243	8.625		12.681			8.032	13.962	9.279		10.161
																				12.992		9.232		7.885			15.686	11.14	7.725		10.518			5.892	14.332	10.273		10.173
																				8.19		8.948		9.188			13.712	10.285	7.742		13.604			8.717	14.976	10.781		8.573
																				12.821		8.219		9.118			12.167	12.114	9.12		12.218			9.846	13.921	9.894		15.849
																				11.999		7.619		11.866			10.228	9.704	9.338		10.626			12.871	13.142	10.542		10.298
																				9.431		6.061		13.667			14.189	11.345	8.461		8.923			8.389	13.593	8.332		15.809
																				9.894		6.201		9.257			9.936	9.995	8.4		11.957			8.862	10.688	12.335		10.774
																				14.42		6.862		8.049			15.33	12.585	11.601		10.276			7.86	9.637	10.173		13.543
																				16.558		7.798		6.664			9.218	12.872	11.201		10.405			10.457	8.999	10.647		11.85
																				13.662		10.596		6.435			11.14	11.515	8.24		11.783			11.666	14.029	10.211		16.282
																				14.12		11.94		8.326			10.498	7.35	10.855		8.362			12.451	8.838	11.671		14.807
																				10.173		7.393		8.634			13.649	12.534	10.674		10.384			10.085	10.334	14.314		11.588
																				10.359		8.247		8.081			10.72	11.257	10.602		9.748			13.089	13.899	12.771		14.25
																				12.368		8.381		8.953			10.339	10.396	11.634		12.731			12.532	9.404	10.05		13.888
																				10.398		8.636		6.669			11.388	13.544	9.255		10.047			12.389	10.92	8.702		12.809
																				6.82		7.364		8.253			12.725	11.082	7.84		10.969			15.643	8.741	8.24		12.893
																				10.64		8.978		11.143			13.675	10.395	12.848		10.248			7.774	5.628	16.704		13.335
																				10.208		9.089		9.101			10.545	7.986	9.117		11.435			9.21	11.237	11.535		8.465
																				7.693		6.857		8.128			10.919	5.354	8.216		10.145			10.731		10.405		7.959
																				10.347		5.421		8.156			12.12	10.84	13.825		9.855			14.065		13.901		9.494
																				10.604		5.986		9.899			10.47	8.406	14.864		11.743			15.142	14.93	9.46		14.913
																				10.958		12.811		11.581			11.004	10.333	10.863		10.647			14.812	11.622	10.602		13.335
																				11.257		8.708		8.053			14.744	6.825	9.696		10.518			6.888	14.476	10.647		13.222
																				9.03		11.079		12.184			13.919	10.417	9.993		11.512			12.573	12.094	10.107		11.236
																				10.049		11.365		10.25			8.998	10.9	11.173		9.741			15.526	14.461	11.426		11.185
																				10.639		11.142		7.677			13.009	10.547	11.426		8.216			12.621	15.28	9.842		7.182
																				8.718		9.533		9.896			13.075	10.444	11.064		9.855			11.864	14.025	8.267		13.394
																				10.498		9.844		9.188			12.22	6.825	12.553		13.59			12.621	13.365	8.789		12.43
																				9.818		11.415		9.26			9.769	10.444	11.312		10.878			12.56	12.719	10.22		12.208
																				7.475		8.385		7.576			14.27	9.28	7.742		15.679			10	18.841	10.173		7.336
																				6.833		10.04		9.645			10.66	12.515	6.944		10.211			13.527	11.143	7.663		13.325
																				10.737		9.144		10.386			12.697	10.901	11.116		7.609			12.573	7.907	10.781		10.674
																				8.541		9.889		8.597			11.686	11.743	10.71		14.949			12.14	11.435	10.948		9.338
																				10.457		9.34		9.645			9.937	13.481	10.405		12.19			16.417	17.169	12.979		14.144
																				9.855		9.773		9.75			11.293	11.973	11.266		13.411			12.512	11.769	12.771		13.028
																				12.306		7.489		8.241			14.088	9.937	10.298		9.696			19.13	17.209	8.278		8.962
																				15.449		6.07		10.783			11.588	10.628	9.148		11.244			10.863	11.931	12.641		9.955
																				12.21		9.351		7.593			11.363	9.212	12.681		12.53			14.099	11.857	11.368		13.44
																				14.641		10.744		6.548			12.854	10.901	10.405		11.634			11.51	14.39	12.491		10.211
																				8.574		7.764		11.792			8.649	9.578	10.713		13.263			13.665	9.652	10.602		13.325
																				13.416		8.049		15.281			11.741	12.402	8.216		10.802			12.771	7.393	14.078		15.805
																				9.048		8.751		13.968			11.538	9.488	11.13		8.614			11.772	11.865	12.231		15.184
																				11.065		8.131		13.224			11.357	10.103	10.047		10.878			9.945	12.853	12.761		16.704
																				12.56		10.223		12.033			12.208	9.844	13.038		12.208			12.417	12.48	13.174		11.634
																				8.891		9.282		11.792			16.605	8.542	14.436		13.889			9.738	13.412	12.265		14.7
																				13.399		6.604		12.286			12.36	8.094	12.281		12.731			12.868	13.252	10.707		13.816
																				13.925		9.138		11.515			13.07	8.032	12.893		14.743			12.469	9.838	8.691		10.276
																				11.991		11.176		11.006			13.075	10.901	15.311		9.186			9.942	14.786	12.335		9.46
																				9.174		7.971		10.921			13.68	11.761	11.885		11.443			14.561	10.843	12.937		10.614
																				10.376		7.451		13.714			13.512	9.243	10.957		13.797			14.957	8.086	13.834		12.991
																				8.816		9.065		13.3			10.498	13.072	13.249		12.032			14.622	6.469	13.962		11.535
																				11.887		8.034		11.038			11.344	9.652	10.611		12.428			14.347	15.154	12.14		12.376
																				11.246		8.191		13.63			12.691	11.76	12.231		12.252			10.919	11.378	10.878		10.047
																				10.174		10.583		12.856			11.881	9.095	10.095		12.53			14.808	14.629	11.669		12.179
																				9.037		8.032		12.033			14.088	9.488	9.894		13.834			12.762	7.373	10.047		9.429
																				11.444		10.097		11.415			12.606	8.998	12.701		9.593			14.585	8.72	10.71		9.855
																				11.208		11.442		13.143			13.759	8.364	8.836		9.389			14.972	14.993	14.637		11.426
																				10.405		8.978		10.334			12.498	8.405	11.764		13.686			16.353	17.127	12.621		10.208
																				10.01		9.488		9.909			13.168	8.362	9.593		11.493			11.601	15.069	12.731		8.139
																				11.107		12.153		10.472			9.28	11.057	10.506		9.932			14.729	14.649	11.107		8.465
																				11.444		6.943		7.351			9.464	10.284	9.593		15.493			10.339	13.663	12.252		8.24
																				14.155		11.5		12.033			14.25	7.582	9.553		7.92			15.332	17.948	9.338		12.532
																				10.611		11.362		11.973			11.21	11.533	12.466		11.778			9.156	13.251	10.158		12.868
																				9.821		8.219		15.611			14.884	11.005	14.314		12.14			16.52	13.724	12.621		8.684
																				14.108		11.257		13.865			10.767	10.721	14.812		9.748			14.11	13.948	14.769		11.612
																				9.101		9.031		14.09			11.133	9.212	13.924		10.226			13.919	16.091	11.15		9.553
																				9.955		8.825		13.719			14.783	12.585	10.545		12.821			8.03	12.355	17.923		7.503
																				11.827		8.317		10.187			13.141	9.937	11.968		12.291			14.634	20.642	8.48		9.61
																				11.832		8.912		11.59			14.509	11.649	9.117		8.691			11.435	12.208	10.84		10.781
																				10.444		8.46		13.429			11.513	9.584	12.731		9.5			12.038	15.753	13.125		12.374
																				9.311		8.149		13.143			15.562	10.395	9.593		9.141			8.165	9.556	7.575		12.376
																				12.601		8.571		10.608			10.221	10.471	9.593		10.611			14.027	9.844	9.738		13.435
																				9.495		8.032		10.472			8.715	5.628	15.883		12.613			12.307	11.446	10.393		11.928
																				8.65		7.422		12.603			7.437	9.958	14.769		10.347			15.351	10.555	8.332		14.126
																				6.623		10.555		13.186			11.004	8.837	13.028		9.659			12.231	11.548	8.815		15.74
																				9.533		7.572		13.429			13.314	7.272	11.532		12.458			15.119	10.616	10.276		9.54
																				14.615		5.896		11.384			11.382	10.284	13.527		8.847			13.454	9.106	9.259		9.945
																				14.257		7.91		13.397			13.298	10.721	13.59		9.932			17.508	10.349	8.267		11.778
																				13.143		8.948		13.782			10.186	10.662	10.31		8.595			11.342	9.653	9.553		8.24
																				12.402		9.049		15.92			17.102	9.532	9.61		11.412			12.428	10.261	10.925		7.358
																				11.515		9.293		13.782			10.707	9.117	16.622		10.76			12.621	12.281	11.62		12.458
																				8.912		8.98		9.533			8.507	10.92	10		8.951			13.028	14.138	12.376		12.618
																				10.06		8.032		12.453			8.465	8.634	7.084		9.12			12.208	18.008	11.359		11.653
																				12.263		8.28		12.139			14.189	9.118	12.89		9.036			12.242	11.753	11.207		12.304
																				10.776		9.324		7.774			10.827	8.032	8.717		9.279			11.989	12.872	8.483		10.161
																				16.953		10.901		8.924			12.114	8.466	11.904		11.244			12.741	7.907	8.717		10.957
																				6.826		9.597		13.32			10.926	14.415	9.593		12.659			11.633	11.129	10.405		11.579
																				13.055		11.068		10.615			10.545	12.233	11.957		11.764			10.424	10.012	11.625		12.242
																				11.244		7.615		8.148			12.072	12.332	10.614		9.855			12.497	11.854	6.605		12.573
																				10.187		5.761		7.677			10.559	9.157	8.962		13.742			8.691	13.866	12.032		9.523
																				12.534		8.466		6.889			9.471	11.006	9.085		17.207			13.499	11.664	11.426		8.389
																				9.771		6.425		7.228			9.85	13.635	9.871		12.135			9.984	11.951	9.473		10.611
																				11.761		14.565		10.471			11.881	13.765	9.855		9.894			11.15	15.069	8.465		16.287
																				11.135		11.246		9.047			12.208	13.055	12.621		11.342			16.82	13.224	13.318		9.751
																				10.299		12.283		10.601			10.66	13.53	12.021		10.957			14.464	9.09	9.089		11.677
																				10.901		10.051		9.934			10.193	9.871	12.389		10.161			10.542	10.828	7.388		15.427
																				13.782		10		9.009			10.339	14.432	17.279		12.674			9.186	14.57	14.812		9.751
																				12.139		7.228		10.187			14.083	13.781	12.135		20.989			9.593	14.509	11.15		11.633
																				12.856		8.815		11.403			16.383	15.688	13.07		11.493			9.307	14.33	10.995		12.135
																				13.273		10.352		10.162			13.222	12.402	11.401		12.932			13.527	9.464	8.717		9.266
																				13.766		12.772		13.175			14.39	12.121	12.252		13.59			11.51	15.536	10.922		11.13
																				11.135		11.602		12.157			13.48	7.96	7.638		9.266			12.327	18.991	12.53		17.818
																				10.334		10.174		13.889			11.037	7.906	11.85		9.099			12.671	10.628	10.298		10.095
																				8.312		7.337		8.389			11.004	12.121	11.255		9.047			11.104	11.39	10.626		18.233
																				9.087		11.245		10.077			13.394	11.514	8.76		12.314			11.691	11.973	10.098		12.977
																				10.848		9.739		8.405			10.058	12.221	8.48		20.191			12.335	12.233	11.061		11.885
																				13.714		6.819		8.574			11.532	13.664	10.273		10.545			11.387	12.5	7.663		10.53
																				9.697		9.505		10.101			13.764	13.601	9.12		18.284			10.863	9.242	13.089		8.595
																				11.006		10.249		9.817			13.07	10.395	9.593		15.26			17.168	10.667	11.625		12.641
																				9.366		10.896		12.98			8.268	6.815	7.563		20.063			13.089	8.87	11.634		13.318
																				8.032		12.711		14.778			12.725	9.86	10.375		12.137			15.197	13.224	12.641		8.789
																				11.39		9.895		7.576			11.662	11.037	13.21		16.069			10.226	15.262	12.14		11.107
																				12.05		8.632		11.428			11.037	8.554	12.881		17.536			13.125	10.299	11.443		9.643
																				11.058		9.83		10.052			10.193	9.065	11.07		17.536			9.389	8.633	8.139		15.442
																				9.22		8.863		8.466			9.156	5.679	9.984		13.888			13.937	9.465	9.855		14.126
																				9.873		12.136		7.04			14.189	8.338	12.314		15.185			14.508	11.038	11.493		9.31
																				10.561		13.233		8.333			10.545	14.096	10.295		14.134			15.665	10.721	9.942		12.325
																				9.996		8.175		10.222			12.031	7.631	8.865		12.937			10.375	15.802	11.821		18.072
																				8.741		8.252		8.39			11.851	9.245	10.273		12.871			18.424	13.46	10.276		11.512
																				11.883		10.407		11.784			11.382	11.827	10.539		15.26			9.709	13.884	8.76		12.21
																				8.508		11.004		12.308			9.117	7.988	11.107		7.571			11.815	13.524	11.783		10.53
																				11.614		10.695		13.834			6.057	9.344	9.422		12.22			11.334	14.884	15.561		16.778
																				10.194		10.051		12.135			4.921	12.377	12.032		10.332			13.325	13.929	10.469		10.057
																				11.295		9.484		14.892			8.405	9.512	10.695		9.828			11.3	13.713	11.269		8.962
																				13.186		10.357		14.685			8.302	15.563	12.314		12.532			12.871	10.048	10.158		11.634
																				11.346		10.433		11.671			11.388	14.843	14.296		13.889			12.53	15.397	9.603		9.61
																				11.889		7.529		19.258			13.779	11.588	11.997		9.897			6.962	13.63	8.64		12.893
																				11.006		9.541		11.245			10.545	9.701	14.561		11.732			12.739	11.805	13.649		12.307
																				11.955		8.081		7.852			11.735	9.284	7.9		11.404			12.691	14.725	14.743		13.527
																				9.165		7.358		10.854			13.026	11.014	15.581		9.176			11.968	7.006	11.3		10.009
																				12.05		8.633		11.04			13.543	13.023	7.63		10.647			11.51	9.466	12.731		8.951
																				11.559		7.688		14.155			12.025	9.579	12.208		13.825			15.363	14.489	13.378		10.614
																				10.829		9.029		14.926			10.84	10.37	10.101		11.669			11.732	14.39	11.968		11.412
																				10.499		8.405		11.959			8.38	13.445	11.957		10.22			13.184	16.643	9.099		19.943
																				8.716		11.065		9.03			9.117	12.772	10.802		14.864			15.643	13.222	11.864		9.085
																				12.362		7.828		7.337			13.271	12.496	10.123		18.137				12.231	10.545		10.707
																				12.693		8.466		15.104			10.298	14.799	11.244		15.026				9.651	15.534		10.602
																				13.224		9.085		11.743			14.932	9.414	12.731		9.855			13.222	9.365	12.307		11.557
																				10.251		9.515		12.211			14.174	13.418	9.176		7.663			14.898	8.837	14.994		10.298
																				13.224		8.324		14.901			12.486	11.734	8.746		10.298			12.064	11.971	11.446		10.375
																				11.295		7.792		10.459			13.118	15.667	10.469		15.058			9.842	12.377	12.417		12.114
																				10.927		6.773		9.02			13.036	10.843	8.702		9.709			13.59	9.242	11.207		11.038
																				10.003		7.969		7.796			8.582	9.838	12.881		11.893			9.392	10.221	12.369		12.649
																				8.466		11.906		9.994			14.917	12.941	10.497		10.375			10.948	10.626	13.88		11.936
																				9.374		10.864		12.409			9.241	11.548	13.435		12.53			14.947	14.841	15.303		9.603
																				10.662		12.771		18.399			12.892	9.745	9.036		11.244			9.955	12.313	9.696		15.697
																				9.822		10.567		9.187			9.101	17.495	10.611		10.009			15.194	13.292	12.376		8.573
																				8.839		9.257		9.611			11.255	11.175	11.691		12.064			13.527	8.03	10.076		11.426
																				7.666		8.674		11.202			12.848	8.521	11.864		10.611			12.252	7.665	9.846		10.359
																				11.244		7.825		10.888			14.255	10.56	8.359		7.704			14.769	10.298	8.833		10.405
																				12.122		10.856		11.286			12.119	12.341	14.994		11.885			10.957	10.47	12.127		11.363
																				11.365		9.099		11.37			13.07	12.409	13.145		12.21			13.555	6.824	12.077		12.948
																				10.003		11.211		10.123			11.494	9.526	9.029		9.984			14.99	5.728	12.179		12.03
																				11.694		10.077		8.175			10.058	9.771	10.746		10.098			12.701	8.715	8.146		8.922
																				13.381		8.952		14.39			13.184	10.898	12.265		9.365			12.135	8.54	8.951		11.85
																				12.402		10.174		9.594			12.19	10.266	11.104		9.089			12.497	7.072	10.405		14.909
																				12.263		8.268		13.212			13.716	8.929	11.764		10.925			13.937	7.514	9.368		8.048
																				12.5		8.127		10.857			14.011	10.455	16.433		13.411			9.846	14.937	9.513		10.298
																				12.923		8.065		8.684			12.87	10.871	12.307		9.061			14.285	14.155	13.222		15.708
																				14.09		6.11		10.357			14.567	9.662	9.513		9.307			10.248	12.948	7.63		13.543
																				10.194		6.582		9.424			11.082	12.811	8.702		9.741			11.342	9.871	8.127		17.111
																				9.031		8.862		14.227			11.531	13.051	7.742		11.096			12.053	11.344	10.781		11.885
																				9.938		9.595		9.712			14.7	11.93	7.84		9.643			12.064	13.649	11.404		12.281
																				9.556		9.145		6.105			12.325	10.751	13.028		6.552			8.48	12.725	10.713		11.141
																				10.722		9.484		7.228			10.72	11.751	9.279		8.146			16.312	9.732	9.186		11.024
																				11.515		9.748		11.116			10.774	10.862	10.855		9.59			10.35	7.072	7.474		13.859
																				9.102		9.488		12.981			12.809	9.025	12.881		10.35			9.141	6.3	10.173		15.247
																				8.839		7.453		7.61			11.971	8.364	7.422		6.79			12.053	14.563	14.563		15.649
																				8.634		7.825		12.43			14.841	11.792	10.433		7.227			8.923	13.779	7.795		11.559
																				15.542		8.615		9.099			10.339	12.849	9.389		15.353			8.614	15.227	6.893		14.072
																				11.59		9.899		12.22			11.413	11.539	9.871		10.899			8.389	8.172	10.948		15.119
																				11.446		8.127		12.306			12.892	13.244	8.139		8.389			10.173	12.03	8.919		13.385
																				14.136		8.952		14.289			9.732	9.165	12.179		9.816			10.35	14.563	9.429		15.363
																				11.852		10.222		9.429			9.993	15.28	9.696		9.141			12.307	14.225	11.968		12.417
																				10.709		11.361		12.562			12.498	10.668	11.493		17.146			10.136	12.584	12.873		16.187
																				11.038		9.103		12.533			14.489	16.885	12.021		9.846			11.255	11.024	10.957		11.968
																				10.024		9.029		11.83			11.363	13.676	16.687		8.127			11.337	10.984	10.173		15.697
																				9.031		8.209		11.653			12.92	9.373	12.92		9.12			14.017	11.185	10.019		10.384
																				6.436		7.53		9.873			10.826	9.586	7.138		17.472			11.176	15.203	10.713		11.707
																				7.273		8.217		8.364			10.66	8.329	9.748		6.547			8.355	12.19	10.781		10.375
																				10.341		6.068		9.117			11.513	7.96	6.562		8.154			10.095	8.87	9.389		12.671
																				10.547		10.058		10.405			12.719	8.993	10.863		10.674			7.266	11.741	10.136		14.787
																				11.135		7.389		13.884			11.753	8.033	14.017		11.826			10.248	10.606	9.855		10.276
																				10.986		7.664		12.871			10.415	9.138	10.65		10			11.904	11.388	14.108		10.79
																				8.364		10.077		16.295			10.058	12.076	10.384		8.032			10.781	12.208	7.981		11.957
																				11.038		9.674		12.032			8.91	8.808	12.628		13.461			10.713	11.857	10.457		11.244
																				8.466		7.53		12.12			9.403	9.322	5.558		10.887			10.248	9.842	10.095		11.471
																				9.351		9.099		15.855			11.759	10.414	7.336		8.267			11.337	13.271	13.232		12.208
																				9.844		10.249		13.682			12.92	8.149	12.376		10.611			14.06	13.053	12.771		16.835
																				12.033		8.326		13.25			11.537	10.266	8.584		8.127			11.401	9.85	10.71		11.312
																				12.517		7.89		13.967			13.442	8.948	8.127		10			14.209	8.632	9.368		16.159
																				10.769		9.605		14.311			13.479	8.726	10.737		11.601			13.937	10.978	10.211		9.46
																				11.025		10.449		13.055			15.329	10.308	11.3		10.731			13.028	12.492	10.647		12.537
																				7.987		9.104		12.939			13.759	10.898	11.107		8.829			12.116	10.298	12.43		9.186
																				14.432		7.504		13.677			13.075	10.832	8.24		13.86			12.095	8.302	14.108		14.026
																				12.327		10.613		13.25			13.862	12.081	9.709		10.396			11.207	12.325	12.182		13.363
																				11.688		10.613		14.81			11.388	10.454	11.741		11.359			11.559	8.189	11.989		18.421
																				13.143		8.582		7.112			9.584	11.622	11.444		11.087			12.14	10.978	8.702		16.922
																				11.515		8.268		9.118			13.052	10.791	10.395		10.899			10.899	13.249	11.13		9.305
																				9.938		7.285		10.296			10.524	12.984	10.395		11.426			13.249	11.363	11.691		12.067
																				11.955		7.371		11.744			13.314	8.968	11.037		11.634			11.829	9.636	11.173		10
																				13.039		9.896		10.174			11.686	8.576	11.513		11.864			9.148	10.443	10.614		10.65
																				9.374		9.71		9.595			12.959	11.834	12.19		11.653			7.86	8.632	10.497		13.089
																				10.187		7.829		8.081			14.144	11.36	10.186		10.457			12.327	8.507	8.702		10.347
																				14.624		10.174		10.97			13.313	8.195	13.037		9.389			12.062	14.029	12.55		7.084
																				17.649		8.834		6.782			12.119	11.322	10.172		12.469			13.658	17.613	10.497		13.028
																				11.828		9.122					13.716	10.657	10.019		14.222			12.265	7.572	10.22		10.737
																				8.716		7.722					12.048	11.498	11.201		10.707			12.407	15.333	7.904		11.342
																				6.826		10.732		10.537			15.561	9.103	8.614		21.212			15.462	11.755	11.85		9.894
																				11.358		7.576		10.078			24.359	11.026	8.573		10.301			19.873	13.572	7.981		10.375
																				9.734		11.579		7.537			14.607	11.548	11.176		12.893			13.213	15.611	11.255		9.31
																				10.159		8.155		7.209			15.071	13.143	8.951		11.286			9.099	14.746	7.609		8.944
																				14.367		7.04		8.702			10.66	14.591	9.659		11.096			13.962	11.384	8.127		9.871
																				11.859		9.956		8.332			13.675	11.195	9.31		10.433			13.859	12.811	8.804		10.35
																				10.709		9.592		7.722			11.356	12.403	10.076		14.314			13.028	11.829	12.428		10.737
																				8.407		6.563		8.839			9.372	12.585	9.643		10.405			10.76	13.077	7.231		8.389
																				11.743		6.931		8.269			11.532	10.432	12.231		7.9			13.232	10.722	11.061		9.8
																				9.578		8.466		9.817			11.735	11.472	10.855		8.423			11.742	13.224	9.738		7.491
																				8.304		6.434		10.501			11.612	8.364	8.146		13.66			12.649	12.856	10.713		10.226
																				6.95		7.722		9.482			12.261	9.093	11.971		10.05			12.374	13.121	10.101		12.53
																				7.796		8.364		7.204			15.085	8.475	8.048		9.945			11.493	14.146	16.14		8.584
																				9.473		6.625		9.824			14.052	6.585	11.62		13.038			13.999	16.425	12.771		11.401
																				9.465		7.126		11.093			10.826	10.898	18.381		10.614			11.201	11.761	10.854		7.774
																				9.533		5.893		11.78			14.415	8.642	11.764		10.208			14.387	9.496	11.85		12.681
																				12.895		9.172		8.65			13.675	11.175	9.259		11.579			14.234	13.572	13.468		10.047
																				11.415		9.099		9.662			12.189	8.998	14.405		12.428			9.523	12.095	10.713		8.389
																				8.584		9.187		10.266			12.283	12.074	16.604		12.659			10.593	12.122	12.324		10.674
																				10.829		7.319		8.036			12.77	10.26	12.659		7.827			13.038	10.177	12.671		10.173
																				7.458		9.211		8.605			9.936	9.35	6.72		9.741			10.173	12.398	13.125		10.542
																				6.698		10.221		6.439			9.1	10.795	14.456		12.428			12.498	14.734	12.971		10.737
																				9.578		7.743		7.906			10.395	8.348	9.338		10.84			12.697	9.773	13.069		12.389
																				9		6.782		8.485			11.387	11.212	8.423		11.51			13.314	9.212	13.741		9.047
																				10.776		6.82		8.443			11.457	7.796	8.789		10.602			12.325	14.912	12.671		8.02
																				10.52		6.39		8.329			12.725	10.189	11.557		9.473			11.388	10.294	14.786		7.336
																				10.662		6.791		9.059			11.88	10.563	8.595		17.281			14.006	10.608	10.497		9.036
																				8.584		9.663		11.761			10.766	5.679	11.928		11.255			11.881	9.065	8.64		10.158
																				10.715		5.886		10.12			11.14	9.467	8.139		8.573			10.332	10.168	10.545		12.322
																				10.341		7.228		10.722			9.464	13.817	11.15		10.506			15.917	8.338	11.155		11.107
																				10.396		8.279		8.381			8.507	14.003	10		11.644			7.721	9.136	14.853		8.829
																				15.597		5.761		8.905			12.583	8.033	10		8.847			12.03	10.764	12.618		11.829
																				9.909		7.795		7.088			12.399	9.584	8.434		11.457			17.014	11.524	12.181		9.8
																				10.417		8.615		10.033			10.193	11.622	8.4		9.186			11.559	7.424	13.961		7.884
																				12.286		6.865		8.453			9.703	11.111	9.307		8.111			9.894	12.341	10.101		9.141
																				11.496		9.037		10.48			12.03	12.883	10.123		8.923			12.182	8.98	12.613		14.387
																				12.05		7.901		5.941			10.193	13.865	10.957		10.855			11.971	7.805	12.909		14.639
																				11.859		8.24		8.453			10.713	12.518	9.5		11.783			15.665	13.366	12.868		9.8
																				8.542		7.677		7.989			11.685	12.213	11.634		10.001			12.376	9.245	11.815		10.248
																				6.95		8.571		8.77			14.39	9.733	9.61		13.816			9.422	11.435	10.871		11.691
																				7.572		7.35		9.091			9.871	14.627	9.945		12.452			13.997	10.48	10.497		9.176
																				11.295		8.626		10.67			9.494	10.474	8.267		14.21			13.79	7.953	9.144		12.428
																				11.688		10.711		9.399			11.444	11.415	7.142		13.96			12.265	6.623	10.712		16.271
																				11.883		10.498		12.357			10.984	5.097	12.621		9.871			13.834	11.792	9.636		10.713
																				14.392		10.449		7.307			10.731	12.105	7.336		12.921			11.51	12.467	8.789		9.816
																				18.567		8.581		9.106			11.342	15.96	11.992		12.635			14.017	7.878	8.251		11.861
																				11.688		9.187		9.997			12.628	12.822	8.702		8.566			11.278	8.594	11.299		12.231
																				12.122		11.096		11.566			14.365	13.631	9.829		9.148			13.416	8.504	13.346		14.943
																				13.482		9.211		9.353			13.997	13.737	9.842		16.141			11.691	13.129	9.751		13.649
																				14.009		8.863		5.519			12.779	12.398	9.378		12.959			11.334	10.419	9.31		11.653
																				12.033		8.333		6.786			13.325	10.615	8.343		11.21			14.387	10.669	7.888		9.709
																				12.454		9.661		8.552			15.59	10.002	9.663		15.414			14.672	12.419	7.86		9.099
																				9.031		9.592		7.184			11.342	11.663	9.036		10.298			15.754	9.284	10.863		12.032
																				10.23		12.118		5.986			13.96	8.621	7.592		12.77			14.587	8.036	11.652		11.62
																				10.417		13.162		7.537			12.291	12.608	9.709		9.577			11.85	12.392	11.799		10.186
																				10.901		9.673		5.986			12.618	9.527	8.076		7.904			11.653	7.641	9.799		13.567
																				11.025		9.894		6.714			10.158	9.997	8.569		9.554			12.932	12.004	11.4		10.995
																				9.102		8.139		8.77			14.567	9.307	7.571		9.554			13.889	14.027	14.386		11.904
																				8.911		9.176		7.575			12.618	10.979	8.865		8.03			12.92	13.748	9.337		13.742
																				20.855		9.515		6.448			13.86	9.324	10.298		9.85			10.05	10.547	9.993		11.255
																				13.141		8.761		6.69			13.104	12.849	9.378		6.266			12.92	7.004	10.157		13.411
																				10.471		6.105		6.061			14.213	9.713	11.904		13.384			12.458	13.055	8.048		11.13
																				15.001		10.97		9.705			13.59	13.818	11.677		11.185			10.707	11.093	7.675		6.667
																				10.628		7.837		7.953			12.659	11.524	12.532		12.284			13.461	6.428	12.641		8.216
																				13.545		8.838		9.049			11.104	9.772	11.334		11.357			12.621	12.111	9.819		9.486
																				12.454		8.484		10.048			11.609	13.251	10.731		11.004			12.208	10.119	8.745		11.061
																				11.583		8.515		10.85			13.094	6.89	9.894		13.779			10.542	11.603	11.989		6.706
																				11.972		8.462		10.081			11.965	7.946	13.527		16.592			12.681	12.107	8.614		9.673
																				13.682		9.048		9.136			13.325	10.791	10.707		11.133			9.829	12.024	12.879		10.047
																				14.843		6.962		9.528			12.486	7.593	9.748		8.048			16.729	8.061	10.157		14.365
																				15.851		12.703		8.871			10.405	9.925	9.378		10.284			10.173	11.86	8.139		11.634
																				9.157		7.324		10.064			10.837	7.95	10.151		9.403			14.692	11.183	8.266		12.89
																				7.721		9.844		7.004			12.779	9.713	9.897		11.612			8.836	15.564	9.738		12.861
																				8.862		11.177		8.584			14.142	7.208	10.136		13.862			10.919	15.187	12.4		13.66
																				12.546		9.611		9.846			15.679	9.669	9.593		14.134			9.643	10.526	10.097		11.557
																				10.023		9.555		9.065			10.019	11.136	11.278		15.114			11.532	16.507	11.69		14.296
																				9.465		10.924		11.316			13.73	14.186	10		13.675			11.13	14.231	10.625		10.497
																				13.3		10.228		10.396			12.291	12.499	9.12		13.512			12.769	11.388	9.029		16.871
																				13.273		12.376		7.393			14.365	8.042	9.593		9.842			9.186	13.249	9.172		10.899
																				13.675		9.857		9.597			11.997	7.096	10		9.577			14.242	16.698	7.774		13.742
																				18.628		12.244		7.068			11.207	11.693	8.614		14.846			10.76	15.314	9.829		14.7
																				10.498		12.137		9.918			12.628	10.471	10.173		9.703			11.244	14.491	14.587		12.532
																				13.17		10.604		9.175			15.125	7.095	10.22		14.7			9.483	11.446	10.094		11.471
																				17.856		12.471		8.16			10.896	6.838	9.816		5.149			8.483	11.514	10.172		12.376
																				14.415		6.208		6.857			11.653	8.441	9.894		7.35			10.22	10.498	8.389		10.384
																				11.743		5.604		11.365			9.141	8.331	11.356		11.255			11.018	12.327	5.913		10.497
																				11.662		8.436		8.142			15.776	8.054	8.569		11.134			10.47	13.222	9.499		11.359
																				10.081		10.001		13.314			11.826	9.283	9.503		10.186			8.898	14.332	8.778		7.427
																				9.488		8.268		6.406			14.142	12.275	10.602		11.581			11.058	12.894	8.355		9.242
																				12.699		9.343		8.381			9.099	8.45	8.833		13.764			11.651	12.894	11.968		8.833
																				12.326		8.14		5.881			11.173	9.721	12.265		12.208			11.753	12.401	10.496		13.335
																				7.666		10.425		11.059			14.741	10.047	6.146		9.242			10.722	9.243	7.794		9.738
																				14.252		9.505		13.994			10.611	10.06	7.012		11.037			12.573	12.887	7.741		9.255
																				12.517		11.445		13.28			8.713	8.207	12.064		10.395			15.259	9.937	7.182		11.116
																				13.443		10.783		14.546			9.842	6.126	13.882		11.255			11.904	14.511	9.255		7.63
																				14.456		9.621		10.857			12.697	5.79	10.35		12.36			11.772	14.084	11.556		14.581
																				10.341		10.616		9.857			12.19	10.262	8.324		13.053			9.486	18.797	9.483		11.559
																				10.396		8.953		9.645			13.416	9.165	8.64		11.344			13.901	12.871	8.139		14.296
																				12.586		9.308		11.831			11.953	14.511	11.764		10.827			14.033	12.856	7.888		12.156
																				13.544		8.268		10.715			15.071	9.652	11.936		10.774			14.672	12.073	12.85		13.924
																				15.467		10.398		11.203			9.936	9.578	7.774		9.148			15.096	13.962	11.556		13.555
																				7.805		8.715		14.135			9.471	10.709	10.497		11.037			17.384	9.577	10.359		11.62
																				7.351		9.143		10.187			11.024	11.294	9.712		13.314			14.153	15.143	11.255		8.951
																				9.871		7.926		13.091				11.514	11.359		10.193			9.932	13.931	6.667		7.575
																				12.233		7.031		9.177				16.455	8.58		12.691			17.859	16.506	8.324		11.21
																				11.212		6.606		8.022			14.905	10.395	9.422		8.91			11.772	11.18	9.999		12.641
																				10.103		13.265		10.222			17.335	15.449	8.595		11.692			13.249	16.734	8.829		10.638
																				14.64		9.743		8.92			15.303	11.294	10.31		11.759			11.404	8.406	12.118		9.286
																				12.618		11.512		12.883			11.865	5.679	8.746		17.102			10.009	14.563	8.22		16.81
																				9.923		13.03		11.143			8.952	12.538	9.696		12.096			14.153	6.772	8.944		14.153
																				11.863		10.049		9.944			14.454	11.363	12.91		10.101			15.981	16.802	5.147		13.145
																				10.209		7.776		10.228			17.407	11.004	9.923		14.405			12.991	9.35	8.4		14.672
																				10.842		9.75		10.544			12.493	7.437	11.707		11.185			11.207	14.565	13.834		14.024
																				7.841		8.022		13.089			12.139	7.073	10.359		18.931			10	10.323	9.428		12.428
																				13.167		11.423		12.683			13.779	12.949	8.48		16.967			16.606	9.365	8.836		10.925
																				13.544		10.547		10.676			10.864	14.138	9.523		13.416			10.22	12.169	8.683		8.702
																				11.203		9.501		13.011			12.763	10.047	11.038		14.134			12.486	13.248	11.633		9.31
																				8.14		11.089		9.288			13.38	15.834	7.675		16.172			12.119	10.694	9.593		12.322
																				9.917		9.638		9.118			13.63	11.858	10.405		17.646			14.515	15.536	11.633		16.051
																				12.466		9.15		11.209			12.981	14.465	10.957		14.627			12.961	12.121	11.653		14.909
																				10.301		7.031		8.762			13.03	12.13	8.048		9.471			12.939	13.765	14.702		12.741
																				11.97		8.053		8.816			16.93	11.955	6.706		9.093			11.056	12.21	14.672		9.829
																				10.616		12.468		10.058			13.999	6.693	9.984		12.606			10.119	11.955	10.539		10.84
																				10.628		10.459		8.805			15.378	10.147	9.186		16.883			14.828	11.363	10.356		12.085
																				12.117		7.424		14.209			15.255	11.193	12.417		11.388			9.962	8.871	11.342		9.392
																				9.048		7.424		11.999			11.025	12.443	8.713		13.427			9.071	9.653	11.244		9.338
																				10.888		10.275		8.081			13.569	12.326	10.925		12.606			14.78	12.727	14.559		10.107
																				8.684		6.105		11.973			11.246	11.971	5.983		11.445			12.377	6.07	10.925		13.205
																				10.349		6.815		8.567			14.289	10.25	7.563		12.325			9.04	13.142	9.984		9.483
																				10.459		10.544		13.963			14.001	12.209	9.186		11.004			13.629	9.908	9.984		12.881
																				13.771		7.982		10.459			8.924	11.388	8.08		10.395			6.57	10.159	9.338		9.916
																				9.663		9.71		10.398			6.819	13.781	6.72		11.953			11.858	9.118	12.91		11.176
																				9.38		9.515		9.02			9.817	10.687	7.349		6.824			8.978	10.769	13.66		9.473
																				10.086		10.187		7.175			10.357	10.526	10.899		9.101			9.577	15.96	12.739		10.506
																				13.511		8.191		14.049			13.441	10.767	13.512		10.298			10.033	15.002	13.992		11.178
																						8.218		10.532			11.634	13.899	11.004		14.052			7.952	15.902	8.64		13.086
																						9.595		14.39			13.744	12.418	8.829		14.21			11.182	12.584	11.269		11.903
																				13.546		9.312		14.325			10.175	11.539	10.339		9.28			13.946	14.257	11.479		12.738
																				10.52		8.128		10.395			16.171	10.299	10.498		12.492			10.119	13.385	7.92		15.442
																				10.003		7.35		8.093			15.421	8.782	12.208		10.395			11.242	11.761	11.581		10.921
																				12.654		11.097		8.641			12.329	12.073	9.211		10.193			14.255	13.324	11.707		8.624
																				10.848		8.39		9.37			11.495	7.959	8.465		11.388			13.946	12.943	8.876		12.417
																				15.145		8.805		9.985			12.623	10.299	11.236		14.622			11.601	16.351	13.712		11.47
																				12.722		10.096		9.515			9.212	13.931	9.703		9.372			8.484	9.118	12.701		11.653
																				11.792		6.963		10.649			10.296	8.808	8.837		9.842			11.557	12.5	11.764		11.989
																				12.851		8.805		12.764			9.61	8.928	13.168		11.004			12.921	12.418	13.116		12.927
																				9.087		9.475		9.821			10.97	10.303	12.19		14.464			12.876	11.135	15.007		10.157
																				13.011		6.866		10.712			12.46	10.709	12.325		17.614			11.735	9.652	9.61		11.201
																				11.663		9.611		14.952			13.591	9.512	11.185		12.167			16.172	15.905	12.95		13.742
																				11.384		6.188		11.603			12.682	14.136	13.779		18.312			15.649	12.402	10.542		12.738
																				10.901		10.187		14.407			15.569	11.256	11.753		11.532			12.77	10.229	12.959		8.789
																				8.269		8.077		10.804			11.895	10.85	10.76		14.39			15.854	9.696	9.266		11.356
																				8.407		8.582		10.001			8.462	8.348	11.382		10.606			12.078	13.316	8.513		8.465
																				13.011		10.096		7.593			12.912	7.312	10.228		15.316			12.697	11.834	9.984		9.984
																				16.174		9.281		9.802			10.601	9.909	16.256		11.857			12.4	11.212	11.334		7.084
																				10.689		8.762		10.739			10.175	8.969	12.948		18.699			12.22	12.727	10.84		12.959
																				11.365		8.924		11.403			11.177	9.466	12.584		16.592			16.172	10.601	13.786		11.435
																				8.65		12.316		10.275			9.104	12.198	13.628		18.806			14.415	16.384	12.741		15.006
																				11.889		9.75		12.213			13.283	8.899	9.577		15.971			10.626	12.098	8.389		10.405
																				13.66		9.03		7.982			13.226	8.899	11.741		14.975			14.415	16.763	11.601		7.827
																				10.228		8.924		10.857			11.634	11.212	11.532		16.929			8.649	9.844	8.146		9.894
																				9.37		9.947		11.515			10.047		10.606		19.674			9.936	9.829	15.345		10.208
																				10.352		10.001		9.174			12.893		14.509		13.222			12.606	7.272	13.087		10.349
																				15.722		10.604		8.338			12.575		9.242		10.332			14.913	11.358	9.103		16.953
																				8.988		7.677		8.28			9.645	12.498	12.492		17.281			9.908	12.079	15.125		12.55
																				10.222		8.597		7.906			11.865	11.753	7.112		12.261			10.35	14.084	11.512		15.056
																				16.97		9.611		8.201			11.536	13.222	12.208		15.813			10.957	12.494	14.7		11.175
																				13.04		12.158		8.652			11.302	8.337	10.66		15.777			12.927	15.919	11.928		11.207
																				6.894		10.352		10.119			8.963	15.451	16.26		12.809			10.457	9.741	13.567		10.649
																				9.475		9.146		8.279			11.208	12.606	10.47		9.636			12.497	8.314	13.318		7.03
																				12.468		9.188		8.175			9.611	10.847	14.415		8.389			11.612		12.55		5.534
																				12.283		9.431		7.46			12.635	18.312	11.741		10.73			13.21		10.497		12.137
																				8.574		9.353		9.802			9.286	17.952	9.673		9.855			13.028	11.782	8.944		9.5
																				13.106		7.53		12.331			9.255	15.128	15.218		11.957			9.378	11.834	9.338		8.944
																				15.366		9.555		10.343			10.173	15.854	14.768		8.58			13.527	11.552	8.08		12.673
																				14.236		7.492		8.734			12.881	9.85	12.492		14.989			10.35	8.701	12.182		7.884
																				11.212		10.676		9.087			10.837	13.68	11.513		9.643			16.597	10.927	21.242		6.998
																				8.28		7.359		9.118			10.878	20.386	10.559		8.779			12.861	10.223	10.922		10.273
																				10.011		8.481		6.104			6.998	11.445	12.313		12.6			12.868	10.452	13.282		7.388
																				12.575		11.177		7.631			10.855	8.507	12.031		9.609			18.17	9.282	15.811		13.489
																				11.414		7.796		10.452			9.855	11.612	9.82		13.526			13.686	7.618	9.483		10.674
																				11.991		8.586		10.59			11.885	12.12	13.336		13.441			12.045	10.076	7.692		11.512
																				10.613		10.541		9.652			13.86	12.848	13.336		11.578			9.636	7.215	8.209		10.248
																				11.389		7.04		7.631			6.309	10.66	7.232		12.116			9.817	9.549	13.397		9.279
																				8.704		7.861		9.908			8.362	10.919	11.735		15.35			9.399	8.337	10.737		8.389
																				10.376		6.563		8.87			6.449	14.464	12.325		7.98			11.767	11.004	15.119		8.355
																				11.866		7.829		7.073			14.153	11.662	13.244		10.518			8.559	9.399	12.407		8.804
																				10.604		9.595		7.127			14.135	9.403	8.837		12.873			12.231	12.445	13.917		11.967
																				8.597		9.611		13.734			12.91	11.557	12.114		16.834			15.91	16.223	12.127		10.135
																				11.005		8.175		8.805			11.018	8.862	9.871		10.185			14.585	12.662	13.277		9.709
																				9.595		8.218		7.805			12.182	11.037	10.525		13.888			10.616	11.623	9.984		10.614
																				10.153		12.142		6.405			10.837	11.857	7.437		16.058			13.406	10.111	9.842		8.126
																				8.586		7.454		10.607			12.376	11.851	10.72		14.455			9.72	11.384	12.252		10.383
																				6.792		8.634		10.941			10.173	11.371	7.514		11.652			9.837	14.237	9.741		8.691
																				8.218		8.268		9.414			13.649	11.588	6.3		12.931			12.973	14.547	13.825		13.356
																				10.45		7.458		13.185			12.53	13.96	11.293		11.426			10.175	12.044	17.982		9.816
																				13.164		10.9		12.534			14.456	10.332	7.514		13.589			9.932	12.876	10.896		7.84
																				11.646		8.747		11.973			14.587	7.959	11.881		12.417			9.61	12.073	10.542		9.829
																				11.132		11.152		11.523			13.777	11.532	11.382		13.244			12.095	12.801	9.663		10.713
																				12.514		8.641		9.824			12.853	11.971	12.948		13.377			9.368	13.285	13.225		14.464
																				14.155		9.257		9.85			15.276	8.092	10.707		14.293			8.22	12.499	14.213		11.753
																				13.435		11.817		7.805			15.495	9.372	13.282		12.345			9.513	10.167	12.182		9.494
																				13.994		6.553		9.28			12.04	10.172	7.422		11.311			10.957	11.811	9.099		13.009
																				16.006		5.723		15.499			11.368	8.715	11.421		12.388			11.356	8.808	7.503		14.067
																				13.8		11.537		10.954			11.201	6.446	10.957		10.424			12.739	12.454	9.751		11.457
																				12.097		9.71		10.34			17.029	11.457	12.322		13.299			11.13	11.919	6.104		13.009
																				10.9		9.09		7.763			12.671	7.795	9.099		14.786			8.93	11.623	9.341		9.471
																				11.831		9.505		5.304			9.368	10.023	7.904		10.228			10.542	12.361	10.602		11.513
																				12.184		10.9		13.919			9.984	7.571	9.5		9.186			13.489	9.228	8.048		11.79
																				12.233		11.622		9.45			9.894	9.871	10.211		9.368			9.117	7.208	10.614		12.854
																				13.106		8.022		10.595			12.374	12.031	7.791		14.06			12.937	9.844	12.979		12.6
																				12.254		10.889		10.26			18.067	12.025	9.663		13.07			13.658	13.062	9.82		15.329
																				9.664		10.376		9.26			12.466	8.566	9.368		12.469			11.356	9.611	10.781		13.205
																				10.386		8.022		13.073			13.104	8.715	11.07		10.009			15.278	15.539	8.922		14.937
																				14.216		10.278		8.192			11.426	11.255	11.107		11.764			17.479	9.597	8.216		17.013
																				13.788		10.544		9.324			12.868	10.714	12.731		14.637			14.294	11.94	9.286		11.826
																				14.465		9.611		7.515			14.387	10.221	11.743		15.096			10.647	8.998	7.422		18.564
																				10.865		9.394		12.468			11.15	11.513	10.375		8.789			11.368	14.16	9.099		12.024
																				8.574		7.825		11.95			17.689	9.994	12.064		9.378			10.84	8.824	9.593		17.367
																				11.999		10.959		10.012			11.669	12.19	11.003		10.211			12.19	9.938	7.725		12.219
																				13.569		9.101		9.2			15.575	11.037	14.403		11.885			11.556	11.194	10.855		11.21
																				16.646		13.328		8.824			11.612	8.311	8.111		8.389			12.03	8.727	8.127		11.082
																				12.378		10.222		6.43			13.86	9.22	10.611		9.503			11.759	8.726	7.107		10.171
																				11.866		5.644		9.533			12.659	10.913	13.116		11.426			12.651	10.417	7.016		17.79
																				13.212		9.985		10.657			13.77	9.515	8.815		10.781			12.537	8.148	10.396		11.242
																				13.366		12.378		8.519			11.764	12.417	10.887		12.794			14.415	9.311	10.713		15.027
																				11.523		8.762		9.699			13.087	14.162	9.523		10.614			16.949	13.427	12.893		12.871
																				12.129		9.621		10.023			9.286	15.548	12.327		10.53			13.653	8.538	11.912		11.97
																				10.228		6.606		13.36			16.452	11.804	7.422		8.923			13.221	7.095	11.018		14.269
																				12.376		7.926		8.808			13.797	13.169	11.864		8.24			12.048	10.412	11.107		16.693
																				15.18		7.576		11.707			14.108	11.506	13.277		12.208			12.492	11.806	10.22		17.105
																				12.181		9.896		10.871			11.207	13.829	9.659		11.634			12.92	12.515	9.659		14.082
																				8.762		6.796		10.082			13.162	10.014	8.573		11.826			12.072	10.06	9.8		11.036
																				11.668		10.942		10.87			16.597	11.953	7.231		7.827			9.218	9.117	11.412		12.77
																				11.991		10.883		11.117			18.132	13.137	9.712		7.529			13.721	10.606	10.098		12.417
																				13.463		11.36		10.988			13.335	13.054	8.584		11.912			16.434	12.635	8.032		12.119
																				10.425		10.245		8.873			9.738	13.142	12.771		10.375			12.606	10.514	8.836		9.372
																				10.616		9.736		11.623			12.114	9.117	8.465		8.4			11.388	13.865	8.691		9.156
																				9.674		9.293		9.818			12.314	11.357	5.279		10.542			12.948	9.135	7.9		9.473
																				9.37		9.78		13.943			14.639	15.163	15.849		12.064			13.633	9.757	7.791		8.216
																				7.841		10.315		7.283			13.649	12.939	8.576		13.73			12.583	9.651	6.893		10.602
																				9.621		10.21		9.088			11.885	12.949	9.67		12.369			8.267	8.561			10.433
																				8.39		9.745		8.348			13.665	14.745	10.606		14.692			12.417	11.919			11.732
																				8.222		12.734		9.845			10.457	11.663	15.26		7.592			13.053	9.656	12.469		15.142
																				6.315		10.064		10.863			14.581	8.155	12.208		12.469			14.768	8.834	12.537		10.593
																				10.857		8.916		10.841			14.508	9.652	11.912		11.666			14.249	11.171	11.457		10.356
																				12.118		13.018		12.026			11.997	7.804	9.66		13.66			11.97	9.662	7.981		15.915
																				11.361		12.182		6.267			12.291	8.406	6.625		13.679			12.33	12.106	7.774		11.904
																				12.468		11.515		10.827			17.06	11.663	11.207		10.713			13.14	11.195	9.696		13.527
																				9.485		11.271		8.838			9.392	8.021	13.68		12.821			9.364	10.591	14.287		11.201
																				8.704		11.889		9.421			11.669	8.583	11.864		8.569			10.22	13.912	10.611		8.836
																				11.481		7.805		9.373			14.532	9.351	11.15		10.151			12.03	7.687	11.799		10.968
																				10.278		11.208		10.989			12.466	11.539	8.461		13.658			13.649	11.357	14.447		11.426
																				9.697		12.762		9.616			8.614	10.298	11.061		17.016			12.377	14.365	11.816		10.896
																				9.424		10.081		11.472			11.096	9.117	9.279		9.603			14.622	11.882	9.945		12.291
																				10.275		11.956		10.591			14.207	12.499	10.393		11.881			8.336	11.557	12.314		10.919
																				8.425		14.777		10.159			12.14	7.768	10.781		12.544			11.97	13.055	11.772		11.904
																				7.108		10.724		11.683			11.677	8.19	12.56		13.394			10.193	8.049	7.491		7.774
																				9.818		10.331		11.882			11.851	11.257	10.35		14.083			12.137	9.908	10.863		13.116
																				12.097		10.658		9.873			11.904	10.518	8.847		13.384			11.832	15.528	11.912		11.764
																				10.927		12.931		14.225			11.51	12.261	10.295		14.7			5.691	8.838	8.389		13.356
																				10.649		12.546		12.466			10.469	11.293	8.76		7.959			9.28	13.676	9.984		9.008
																				12.378		12.027		9.888			10.347	8.19	12.769		15.854			11.255	19.459	12.959		14.065
																				6.105		10.177		11.523			9.351	11.388	10.347		12.725			11.055	12.586	10		11.742
																				7.148		9.095		6.981			16.318	11.76	10.248		13.244			9.085	12.379	15.961		12.55
																				5.957		11.142		10			8.513	9.311	11.691		15.241			12.33	13.427	11.557		14.909
																				8.28		11.54		9.048			11.359	10.687	11.426		16.069			7.795	12.121	12.868		8.922
																				9.857		9.745		10.212			16.365	10.721	9.663		8.048			6.116	14.785	11.521		9.751
																				11.655		11.379		9.188			7.721	9.118	11.156		14.543			19.306	15.077	9.54		13.937
																				9.424		9.829		8.952			13.637	13.07	10.569		14.415			10.47	10.628	10.887		10.626
																				7.906		11.866		9.267			11.141	15.372	6.865		12.325			11.388	12.861	11.255		11.799
																				10.842		10.98		7.841			12.681	17.298	9.993		9.651			13.628	13.215	9.62		12.871
																				10.889		12.633		10.541			13.999	15.539	10.085		13.141			10.001	12.894	11.13		9.82
																				9.595		8.502		15.254			13.116	13.651	9.62		13.394			10.925	12.922	12.127		10.855
																				9.71		12.507		10.02			10.076	10.545	11.244		13.075			13.27	15.978	8.829		12.085
																				11.257		11.079		10.783			7.182	14.255	9.894		11.037			11.444	9.851	11.359		6.104
																				11.063		8.873		11.157			9.984	12.379	8.209		20.077			10.687	6.857	10.539		12.325
																				12.43		8.357		8.574			11.07	9.165	13.123		11.457			12.948	9.872	8.987		16.778
																				9.394		10.083		11.389			11.653	14.27	8.389		12.284			12.452	15.087	11.087		8.362
																				12.673		10.608		7.423			13.679	12.377	8.804		14.913			12.486	11.39	11.669		13.937
																				10.162		9.822		8.14			12.156	12.938	6.98		15.672			10.249	9.175	10.136		10.855
																				10.9		10.412		8.945			12.898	11.662	7.422		13.929			11.236	10.721	8.815		15.007
																				13.397		8.741		8.952			11.521	8.838	10.085		14.088			8.189	10.721	12.156		8.789
																				9.353		8.502		12.22			13.094	13.054	10.019		10.774			11.893	18.202	12.307		8.922
																				12.673		12.633		10.058			10.76	6.104	7.071		13.037			14.563	10.559	10.852		9.117
																				12.875		8.103		11.414			13.772	10.662	10.123		16.63			11.3	13.428	10		13.205
																				9.697		10.103		9.994			10.347	11.037	8.209		20.333			11.13	12.602	10.145		10.707
																				11.437		7.035		13.903			14.637	9.164	10.593		13.717			9.659	10.024	10.248		10.76
																				9.122		8.899		10.747			13.454	11.445	9.018		14.189			11.087	14.407	10.781		10.934
																				9.743		9.938		6.513			14.017	14.609	8.919		13.57			19.195	11.882	10		13.637
																				9.031		8.312		7.125			11.087	10.444	10.145		10.599			11.928	11.514	10.019		13.162
																				12.62		11.212		7.337			10.84	11.662	8.139		14.39			12.415	11.791	10.101		11.426
																				12.376		10.432		13.651			10.614	13.443	7.336		10.707			13.116	12.268	10.713		14.847
																				10.449		9.918		13.463			8.837	10.499	11.244		12.77			12.621	14.252	12.197		9.172
																				9.379		8.443		7.906			9.03	12.95	6.865		7.904			12.977	10.545	9.5		8.389
																				13.545		9.23		9.39			13.649	14.784	9.061		14.365			12.208	10.841	12.466		8.58
																				9.595		8.312		11.415			10.332	16.119	8.862		14.006			12.641	11.388	9.61		15.708
																				10.158		10.37		9.101			11.741	15.22	5.558		12.072			10.375	7.438	11.816		8.389
																				10.519		5.767		8.634			9.842	14.252	7.266		10.298			10.405	14.146	10.737		9.603
																				8.674		8.72		10.88			10.498	14.92	11.653		12.854			10.384	12.361	10		11.061
																				7.921		9.58		9.71			11.532	12.209	6.329		10.298			10	9.871	8.923		11.286
																				11.8		8.685		11.246			11.14	12.584	9.422		12.86			11.864	12.585	11.342		12.04
																				10.211		8.142		9.644			12.331	15.638	9.643		13.57			14.078	12.534	12.242		9.741
																				10.295		14.189		8.39			12.325	16.284	8.865		13.591			8.833	10.914	9.255		11.061
																				10.783		10.901		13.919			12.4	15.26	10.173		9.554			11.426	10.769	11.096		8.614
																				12.659		8.976		7.926			7.804	12.923	10.22		9.958			12.242	11.179	9.486		9.255
																				10.9		8.304		7.228			10.984	6.856	7.92		11.255			12.032	9.117	12.208		10.457
																				12.796		8.552		6.962			8.405	14.887	7.924		13.119			12.628	10.92	8.836		7.969
																				9.1		8.899		7.837			10.001	18.209	11.904		8.632			10.737	14.915	11.342		15.971
																				7.359		10.764		9.212			7.804	9.873	9.338		10.774			8.569	12.098	10.781		10.957
																				8.626		8.948		11.361			9.117	11.852	7.725		11.692			8.922	9.873	12.021		12.127
																				8.515		11.212		8.987			8.829	17.895	10.674		14.415			12.307	14.768	10.746		11.368
																				13.632		10.863		8.963			11.494	17.999	9.422		11.363			10.35	12.032	8.389		12.21
																				7.227		10.521		6.999			14.913	13.125	9.709		13.184			11.893	8.542	9.029		10.248
																				9.595		9.653		8.127			10.707	16.285	8.713		17.206			8.032	10.223	8.58		10.019
																				7.04		7.228		9.257			8.092	12.586	8.944		15.409			5.892	13.396	9.117		9.603
																				9.71		7.073		8.552			10.667	9.138	8.804					8.717	13.316	11.255		8.343
																				9.424		9.846		10.921			14.841	10.591	6.562					9.846	12.692	9.286		10.161
																				11.958		8.087		8.193			13.528	10.076	8.389		12.894			12.871	12.693	9.422		12.771
																				10.855		10.377		10.924			8.998	11.459	9.712		10.839			8.389	9.156	6.888		8.815
																				11.203		9.889		7.027			11.494	10.657	6.682		12.291			8.862	14.415	9.603		11.266
																				14.437		10.981		10.426			12.584	15.291	9.82		11.116			7.86	7.721	11.07		10.173
																				13.206		8.634		10.195			8.87	10.843	8.22		12.117			10.457	13.724	11.904		9.089
																				10.959		14.147		11.932			12.12	14.479	11.732		11.357			11.666	12.402	9.036		9.266
																				7.722		9.366		10.441			10.498	15.61	6.72		9.212			12.451	13.336	8.584		11.968
																				9.353		7.582		10.287			16.26	15.506	10.599		6.33			10.085	11.686	9.923		12.681
																				13.244		9.095		9.488			12.725	17.491	13.028		9.393			13.089	11.858	8.779		11.968
																				11.882		7.874		10.341			13.816	18.768	10.301		8.747			12.532	11.76	9.029		11.368
																				10.761		13.084		8.594			9.937	17.67	12.861		11.435			12.389	11.457	9.061		12.182
																				8.596		10.177		8.727			15.922	9.842	12.53		6.33			15.643	8.716	12.242		14.672
																				9.257		10.608		12.306			14.415	8.551	12.304		9.673			7.774	6.116	5.27		11.446
																				12.212		8.477		10.603			11.344	10.147	9.259		10.802			9.21	10.281	8.111		12.868
																				9.38		9.315		9.049			11.953	5.878	12.674		11.117			10.731	9.193	8.189		9.855
																				10.783		11.079		9.734			15.917	15.239	14.508		10.058			14.065	10.395	9.279		15.376
																				9.353		13.397		12.276			12.601	14.212	12.891		9.603			15.142	8.405	8.632		11.644
																				10.137		9.671		11.973			11.037	13.429	13.51		8.355			14.812	11.759	10.276		16.514
																				10.077		12.962		7.004			16.673	17.371	13.581		10.299			6.888	9.464	10.76		13.924
																				12.327		10.103		7.708			7.804	10.662	8.359		8.401			12.573	12.488	13.742		17.111
																				11.302		11.324		9.684			16.069	16.538	10.405		10.842			15.526	11.183	13.225		10.539
																				10.147		14.35		9.963			12.19	14.901	13.527		10.01			12.621	13.109	12.252		8.483
																				14.559		9.467		8.578			12.284	13.656	10.746		10.738			11.864	14.373	14.7		9.259
																				12.854		9		7.422			13.654	15.611	11.3		8.867			12.621	14.308	10.405		13.834
																				14.295		7.962		7.987			10.395	5.354	13.435		9.26			12.56	15.143	11.997		12.512
																				10.273		12.26		8.77			12.809	15.333	14.142		14.351			10	16.204	9.855		10.707
																				16.203		13.409		7.575			12.325	17.859	7.575		8.714			13.527	9.323	11.872		11.74
																				13.461		14.479		8.577			13.759	16.919	9.172		10.212			12.573	11.754	10.722		9.008
																				8.401		13.514		10.12			14.875	11.006	11.201		11.711			12.14	11.025	14.119		13.028
																				11.336		8.542		12.865			12.208	9.087	12.304		8.805			16.417	13.923	10.713		11.669
																				9.713		9.86		11.72			13.292	10.103	8.632		10.855			12.512	11.194	12.659		10.448
																				16.043		14.956		7.844			14.083	12.098	9.659		9.146			19.13	8.551	8.595		14.132
																				11.906		10.135		11.664			13.443	15.748	11.107		13.556			10.863	14.612	12.417		13.174
																				11.361		9.507		8.741			20.29	10.662	11.21		9.392			14.099	6.538	11.081		14.847
																				12.871		8.519		6.826			15.414	14.232	12.681		10.604			11.51	13.573	11.337		13.282
																				9.934		11.106		7.971			10.559	13.126	11.061		9.048			13.665	11.938	11.201		9.855
																				8.022		9.278		10.062			11.255	7.951	9.696		9.924			12.771	9.937	11.038		9.62
																				11.361		11.429		7.312			12.025	8.831	11.612		8.581			11.772	7.216	7.638		10.457
																				13.592		11.435		7.622			10.978	8.049	13.992		7.901			9.945	10.124	14.812		13.378
																				9.818		9.017		10.033			12.025	14.332	14.153		8.268			12.417	10.37	7.86
																				10.628		12.305		11.624			12.031	13.683	10.424		9.343			9.738	10.764	10.375
																				14.018		10.455		8.451			14.387	16.659	15.295		8.017			12.868	11.435	11.269		9.28
																				10.394		11.341		11.479			15.015	12.327	12.182		9.501			12.469	10.076	10.569		8.45
																				11.622		11.437		9.322			10.058	12.811	12.407		8.877			9.942	8.476	8.332		8.211
																				10.457		11.142		8.043			12.032	9	10.925		7.861			14.561	12.762	13.999		9.093
																				12.74		12.188		10.168			16.452	15.244	14.493		6.625			14.957	13.083	12.182		9.859
																				13.058		9.136		12.182			13.655	10.601	12.881		8.462			14.622	7.844	11.625		8.951
																				11.37		8.899		10.662			12.538	14.94	10.518		10.406			14.347	7.373	10.674		17.239
																				10.888		8.685		13.83			10.415	14.785	10.614		9.818			10.919	12.454	11.707		12.53
																				12.732		8.808		10.662			17.035	12.263	11.446		11.21			14.808	12.511	11.633		10.396
																				13.249		6.475		12.853			14.084	10.173	12.211		8.78			12.762	10.377	11.356		13.712
																				10.958		11.485		15.014			9.96	11.834	15.194		8.081			14.585	10.986	15.915		11.579
																				9.984		11.755		12.869			15.149	12.586	10.539		11.622			14.972	9.311	10.356		15.534
																				10.604		11.708		8.784			11.081	14.843	8.076		9.873			16.353	6.961	13.277		15.218
																				8.892		9.617		9.935			13.527	9.095	7.795		9.984			11.601	10.343	8.951		11.421
																				10.471		13.028		8.508			14.428	15.974	11.412		10.357			14.729	10.657	9.8		14.526
																				11.938		9.873		10.23			14.19	15.149	8.032		10.92			10.339	7.708	10.248		10.855
																				11.872		10.205		9.655			13.395	13.888	7.688		11.991			15.332	8.85	10.695		13.241
																				9.243		12.21		7.789			13.167	11.792	9.593		8.713			9.156	13.129	11.07		12.242
																				11.361		10.245		10.844			15.329	13.257	10.396		8.39			16.52	10.04	9.945		9.855
																				9.256		13.887		9.662			14.029	17.859	11.15		11.99			14.11	11.269	6.79		11.581
																				10.349		12.047		12.637			10.828	14.014	6.682		15.469			13.919	15.851	8.962		13.59
																				7.664		8.521		9.159			14.508	17.272	8.76		8.923			8.03	9.481	11.581		14.65
																				12.22		16.487		10.921			14.226	9.586	9.696		10.001			14.634	11.484	13.397		14.639
																				7.371		12.48		13.521			14.19	11.212	10.638		15.366			11.435	12.515	10.957		13.658
																				13.614		13.209		9.118			8.632	11.883	10.085		10.545			12.038		11.356		9.696
																				10.613		11.358		12.628			10.223	9.465	9.286		8.847			8.165		11.953		9.741
																				10.049		8.129		12.192			11.531	12.327	13.882		18.67			14.027		11.547		6.104
																				9.985		8.502		10.472			15.754	8.381	8.267		10.84			12.307		9.66		9.61
																				9.524		9		9.773			13.207	9.488	9.473		10.361			15.351		10.83		16.064
																				10.049		10.287		10.709			11.886	13.546	11.07		13.772			12.231		14.069		11.936
																				9.149		9.773		10.583			14.416	11.761	13.723		15.221			15.119		10.835		12.881
																				11.784		7.764		10.194			9.465	10.547	10.384		9.177			13.454		12.239		8.389
																				13.461		7.073		9.818			19.335	10.299	12.407		11.143			17.508		13.956		10.375
																				9.873		8.808		9.159			12.699	14.432	10.457		13.686			11.342		15.531		11.004
																				8.952		7.687		14.28			14.367	10.52	13.184		11.611			12.428		15.527		11.457
																				12.142		7.764		10.427			7.987	10.601	11.401		11.302			12.621		13.641		10.395
																				7.792		7.657		10.472			18.295	9.243	8.4		13.901			13.028		20.26		12.498
																				8.252		9.882		7.946			10.251	11.559	12.417		11.358			12.208		10.193		13.328
																				9.709		9.846		9.089			11.384	13.055	11.644		15.43			12.242		13.492		12.19
																				6.931		8.621		12.04			13.011		9.659		13.681			11.989		11.396		12.649
																				10.649		10.583		8.899			13.682		13.834		10.049			12.741		8.898		10.151
																				10.099		8.16		10.177			11.688		10.35		16.597			11.633		8.191		13.094
																				7.677		8.407		13.292			12.962		8.052		12.532			10.424		12.03		8.22
																				9.09		9.714		8.98			13.781		6.161		7.921			12.497		11.435		8.962
																				11.336		12.122		15.826			11.515		8.016		8.485			8.691		18.55		10.405
																				10.97		11.324		10.159			11.834		9.593		11.481			13.499		11.25		11.821
																				10.782		11.761		11.175			11.257		11.493		12.253			9.984		10.707		12.794
																				9.555		7.631		12.276			9.937		9.871		13.585			11.15		9.989		11.061
																				8.329		10.04		7.508			14.19		8.76		12.849			16.82		13.755		11.07
																				13.809		10.062		10.872			14.136		14.42		11.071			14.464		11.791		8.02
																				8.83		7.89		11.208			10.334		10.922		13.725			10.542		10.926		12.208
																				11.287		12.379		16.311			12.586		9.255		13.096			9.186		12.717		12.307
																				10.874		8.611		7.861			10.841		5.643		14.717			9.593		7.621		13.776
																				9.117		8.685		11.512			11.827		11.864		12.981			9.307		10.362		11.783
																				7.324		7.045		10.296			11.663		14.447		14.685			13.527		10.158		12.218
																				9.743		7.926		15.57			12.209		12.325		12.796			11.51		13.92		12.307
																				9.424		7.631		10.25			9.77		10.22		11.097			12.327		12.704		10.611
																				12.21		10.909		17.462			9.96		13.442		12.118			12.671		11.36		9.338
																				10.761		6.201		9.857			19.471		14.769		12.139			11.104		10.244		10.375
																				8.39		7.068		13.164			14.332		10.611		11.384			11.691		9.292		24.79
																				12.934		8.561		11.769			14.725		13.414		15.028			12.335		10.033		12.325
																				9.474		7.874		10.715			7.657		13.038		8.017			11.387		11.948		7.142
																				9.38		9.313		11.683			13.335		11.691		9.46			10.863		7.105		13.232
																				9.501		9.2		11.792			11.057		13.555		11.211			17.168		20.492		11.081
																				9.857		9.106		12.941			17.645		12.252		15.65			13.089		9.947		18.024
																				8.481		7.603		12.192			17.741		9.422		15.843			15.197		14.068		14.065
																				10.425		6.27		13.446			15.228		8.632		14.342			10.226		8.503		15.259
																				10.92		8.202		8.219			11.889		16.169		13.605			13.125		10.362		11.88
																				10.732		8.383		10.035			9.909		12.376		10.839			9.389		14.556		16.687
																				10.782		9.882		12.388			14.392		11.278		9.934			13.937		10.033		6.187
																				7.61		8.873		8.634			11.133		12.674		14.79			14.508		10.186		13.282
																				11.268		9.52		8.605			15.206		15.74		19.567			15.665		10.497		14.639
																				16.515		8.383		7.962			18.704		10.276		14.651			10.375		8.218		12.208
																				9.146		8.195		10.331			14.703		12.345		10.616			18.424		8.268		10.925
																				7.267		7.285		9.37			20.067		12.124		11.83			9.709		14.861		13.714
																				12.139		9.065		7.515			11.415		14.169		14.702			11.815		7.879		9.473
																				12.703		8.364		7.393			14.785		12.064		10.541			11.334		6.98		8.154
																				11.132		7.216		7.307			11.038		9.145		13.387			13.325		6.98		10.457
																				11.176		8.381		8.034			14.975		11.15		11.448			11.3		10.06		9.663
																				11.256		7.256		6.741			16.085		17.732		14.019			12.871		12.162		9.145
																				9.243		9.138		7.722			15.187		11.864		13.03			12.53		16.118		9.855
																				16.941		6.293		8.036			13.765		12.19		13.245			6.962		11.737		11.286
																				13.899		5.929		9.136			13.124		14.119		12.233			12.739		12.258		7.174
																				13.211		12.751		7.422			12.136		13.116		15.841			12.691		10.362		8.595
																				12.875		9.34		10.04			14.785		15.195		15.009			11.968		10.453		10.009
																				12.136		11.252		10.699			10.978		13.411		14.42			11.51		10.133		10.539
																				9.96		8.816		9.838			8.911		14.769		12.554			15.363		14.216		8.146
																				7.828		10.377		11.36			9.487		9.148		15.841			11.732		14.297		11.885
																				9.122		9.175		11.46			12.584		11.799		12.293			13.184		8.815		13.249
																				11.246		9.963		6.693			11.184		9.029		15.013			15.643		8.872		13.162
																				12.46		8.402		7.906			10.223		9.483		21.256					12.119		15.795
																				11.448		9.465		8.542			14.57		11.885		10.783					13.255		11.401
																				8.279		7.962		7.106			12.378		11.861		10.193			11.494		10.332		9.577
																				9.281		6.909		8.265			12.21		11.772		10.173			11.344		9.673		9.341
																				11.286		9.159		8.202			17.7		10		8.08			9.651		10.894		10.707
																				10.152		9.183		10.329			14.998		8.829		9.742			14.509		10.412		14.543
																				11.579		6.436		8.508			16.097		11.356		8.962			13.314		10.187		8.749
																				12.895		12.864		9.829			15.259		13.859		10.802			13.779		7.538		12.821
																				9.143		11.709		9.92			12.207		12.064		10.356			13.384		8.829		10.457
																				10.096		9.102		8.219			9.576		13.089		8.24			12.208		10.249		12.085
																				12.307		10.083		7.537			13.57		7.503		10.405			16.256		10.494		12.53
																				9.709		8.911		6.69			14.7		8.389		12.377			12.921		10.332		8.332
																				10.543		5.941		6.571			12.032		10.957		18.284			13.898		8.407		15.608
																				8.268		9.191		5.847			12.19		9.047		13.053			8.91		7.003		11.312
																				10.147		7.489		10.547			12.602		8.22		15.161			11.881		11.269		12.417
																				10.709		9.873		9.351			12.958		12.135		11.741			12.031		8.992		15.679
																				10.01		6.786		10.159			14.874		10.396		11.266			10.926		11.182		12.932
																				13.386		10.942		8.685			16.121		8.951		13.222			10.298		15.26		16.75
																				12.183		9.675		9.996			9.994		8.614		13.73			11.741		15.011		11.244
																				11.711		7.96		10.441			16.809		11.74		12.469			10.66		12.078		6.998
																				11.764		11.36		7.819			10.194		12.932		13.649			13.026		12.584		12.307
																				8.615		9.399		10.048			17.677		11.269		12.466			9.871		14.024		13.468
																				11.495		10.419		6.327			19.874		11.968		12.691			11.887		11.998		8.713
																				10.349		7.762		9.818			11.692		9.266		12.932			16.065		8.91		12.265
																				9.39		8.716		8.93			14.414		11.176		11.743			11.494		4.656		9.145
																				9.487		7.989		8.173			11.834		14.42		13.567			15.076		6.882		13.77
																				8.218		9.496		8.466			11.294		10.056		11.255			13.075		11.371		13.356
																				6.1		15.141		10.224			15.977		13.66		10.737			10.08		12.486		12.116
																				9.943		9.431		9.55			14.188		8.684		10.896			11.79		13.44		9.643
																				9.257		6.013		10.097			17.953		11.42		9.855			14.285		13.66		12.991
																				8.849		8.219		8.97			11.39		8.539		13.232			10.984		10.047		11.764
																				9.743		6.981		9.58			8.338		10.047		12.451			15.525		9.5		10.375
																				9.674		10.341		7.025			12.607		7.147		13.92			12.725		12.893		8.89
																				8.633		8.65		10.547			11.85		10.295		8.892			11.953		13.241		9.54
																				8.892		8.477		8.061			12.534		10.542		9.644			11.236		8.951		11.176
																				10.595		9.253		9.37			17.104		11.367		9.35			11.242		9.186		10.611
																				12.62		15.611		8.831			9.822		12.991		10.498			15.562		10.173		9.368
																				12.43		5.46		8.621			11.556		10.05		10.874			12.515		11.707		16.925
																				9.661		10.99		7.422			11.357		10.789		7.63			8.78		11.061		10.136
																				9.71		9.322		16.98			12.032		10.094		11.627			12.893		10.599		7.571
																				10.301		9.78		7.393			13.676		11.97		9.856			12.12		12.281		10.173
																				10.593		10.608		13.445			16.331		9.036		8.712			15.227		10.855		7.111
																				8.673		8.873		9.96			14.465		10.405		10.614			7.959		12.55		11.815
																				7.982		8.46		8.605			12.221		12.848		10.802			12.22		10.65		11.038
																				9.751		17.109		8.443			12.585		8.805		11.109			13.124		9.029		10.248
																				10.783		14.354		9.245			12.073		8.189		9.12			12.208		12.628		10.173
																				12.181		8.228		10.976			10.977		7.665		8.945			10.228		11.156		11.061
																				11.635		8.061		8.716			16.526		10.339		8.684			10.284		11.404		8.174
																				11.177		11.038		11.683			12.5		6.512		10.052			11.881		11.244		5.628
																				16.607		10.194		12			11.588		8.64		12.375			8.837		11.056		5.197
																				8.952		9.55		7.61			11.614		11.513		10.433			14.489		11.201		7.658
																				10.651		9.55		7.819			11.588		9.163		9.036			13.779		9.279		9.156
																				9.513		6.201		10.876			13.569		12.048		10.899			9.349		10.273		9.765
																				13.938		9.949		8.175			10.978		9.403		7.53			9.156		10.781		5.88
																				11.019		6.439		11.94			8.78		10.157		9.659			13.384		9.894		5.235
																				14.142		10.119		10.414			12.534		7.795		10.001			7.311		10.542		5.489
																				14.211		12.209		7.782			14.703		8.021		6.944			12.921		8.332		5.889
																				12.66		11.83		11.373			10.081		9.907		7.126			15.686		12.335		12.546
																				15.045		12.869		9.597			11.294		7.904		6.791			13.416		10.173		11.025
																				11.773		10.888		8.466			8.031		6.115		8.24			11.293		10.647		10.767
																				12.323		14.157		11.787			12.378		11.789		8.716			12.12		10.211		11.358
																				9.541		8.891		10.769			11.237		9.849		10.297			12.325		11.671		10.223
																				15.576		10.541		6.981			8.935		8.506		8.36			10.193		14.314		13.124
																				13.962		12.266		11.029			8.032		6.772		6.999			9.994		12.771		10.209
																				11.971		7.592		10.752			10.714		8.127		9.643			10.172		10.05		11.206
																				11.784		9.46		8.247			12.451		9.871		8.75			12.697		8.702		10.06
																				13.899		10.567		11.384			10.251		7.986		10.375			9.464		8.24		11.581
																				11.991		11.089		15.821			9.769		11.691		9.02			8.998		16.704		14.294
																				11.427		11.994		10.9			15.243		8.208		8.847			10.332		11.535		12.991
																				10.274		11.536		14.674			10.298		8.127		10.385			12.078		10.405		10.647
																				10.651		7.829		13.921			8.911		12.466		14.393			6.74		13.901		10.614
																				8.049		11.097		12.661			10.223		8.483		6.791			13.48		9.46		12.649
																				8.703		9.661		10.222			7.805		9.265		8.139			10.228		10.602		9.709
																				8.79		10.137		9.501			8.466		10.009		8.405			15.534		10.647		15.33
																				10.97		10.747		11.622			11.533		10.76		5.756			12.697		10.107		10.506
																				10.174		14.483		12.974			11.459		10.161		9.739			11.971		11.426		10.396
																				12.389		10.996		12.21			11.583		9.459		7.572			9.464		9.842		9.871
																				11.827		9.712		12.539			12.21		11.412		10.22			8.974		8.267		8.328
																				10.864		8.333		13.963			12.378		10.219		10.948			14.783		8.789		12.369
																				12.815		7.828		9.009			7.466		8.632		8.573			14.174		10.22		10.384
																				11.865		10.174		6.931			8.829		12.077		10.697			13.759		10.173		13.356
																				9.985		12.096		8.303			11.893		9.008		9.696			12.77		7.663		11.387
																				10.359		14.1		9.501			8.39		12.466		16.404			13.929		10.781		10.737
																				10.498		9.45		8.39			9.118		14.017		8.718			11.037		10.948		12.821
																				7		9.188		8.838			11.434		10.298		12.979			12.652		12.979		10.22
																				10.301		9.501		10.649			16.39		7.575		12.88			8.739		12.771		11.356
																				7.184		8.324		7.726			14.745		11.612		12.872			10.707		8.278		14.683
																				9.423		10.959		11.257			11.737		11.404		11.287			7.311		12.641		15.495
																				9.176		10.394		9.26			8.862		9.255		13.555			11.356		11.368		12.179
																				11.446		5.306		7.89			13.53		12.032		13.818			12.261		12.491		10.65
																				8.147		8.39		8.541			13.63		12.182		12.253			14.464		10.602		11.732
																				11.783		10.925		8.406			12.697		9.255		10.357			10.08		14.078		8.016
																				8.435		11.344		9.621			13.038		9.368		13.363			13.168		12.231		12.077
																				10.226		9.872		8.253			15.161		11.061		16.954			11.056		12.761		10.469
																				9.145		12.244		13.265			13.206		8.573		10.047			10.08		13.174		9.748
																				7.796		11.13		9.515			13.78		11.826		13.44			9.101		12.265		10.626
																				11.344		9.578		14.245			17.796		10.019		15.183			11.778		10.707		12.55
																				10.782		10.676		11.679			13.444		12.731		11.479			11.236		8.691		13.378
																				11.511		9.818		10.103			13.316		12.89		11.711			12.078		12.335		14.06
																				11.971		9.46		13.128			10.333		10.864		12.781			12.635		12.937		10.899
																				10.298		12.336		14.935			10.9		11.003		9.637			9.156		13.834		15.347
																				12.253		7.926		15.411			10.023		10.934		12.041			6.513		13.962		11.435
																				15.758		11.48		14.685			12.073		9.932		13.68			11.881		12.14		14.447
																				8.39		11.176		6.11			15.163		11.677		10.351			13.009		10.878		9.365
																				11.344		12.191		13.862			13.883		10.611		9.871			13.184		11.669		9.089
																				7.072		9.696		12.378			12.208		8.434		9.265			10.84		10.047		11.885
																				8.625		10.543		13.965			13.055		8.833		8.11			11.741		10.71		14.387
																				11.427		12.208		10.712			15.813		10.433		10.673			9.842		14.637		10.31
																				11.62		12.619		12.87			10.662		12.618		15.393			9.769		12.621		9.186
																				9.743		13.167		14.791			11.882		9.61		7.86			10.193		12.731		7.266
																				11.493		10.352		8.838			14.933		8.02		10.97			12.532		11.107		11.387
																				13.73		11.176		12.137			13.338		8.359		13.38			12.725		12.252		7.795
																				15.28		8.217		11.523			15.816		12.307		10.349			9.958		9.338		11.971
																				9.923		8.24		14.815			9.909		7.86		14.419			9.464		10.158		9.8
																				13.808		11.176		10.505			10.848		8.614		10.53			8.311		12.621		13.174
																				8.465		11.621		11.177			16.174		11.087		12.682			12.937		14.769		12.53
																				8.779		8.747		9.578			14.012		10.542		9.663			9.101		11.15		10.161
																				7.676		11.602		8.634			15.416		9.145		18.446			9.311		17.923		10.173
																				16.96		6.856		12.781			12.167		8.632		13.769			11.538		8.48		8.573
																				10.567		6.93		10.541			16.932		10.957		10.351			10.193		10.84		15.849
																				10		7.721		10.927			11.533		11.286		12.618			12.921		13.125		10.298
																				10.347		9.243		12.637			14.491		12.709		11.744			8.302		7.575		15.809
																				9.03		10.64		9.996			13.962		9.368		9.753			11.887		9.738		10.774
																				13.357		8.762		8.78			13.89		12.179		10.996			11.037		10.393		13.543
																				14.25		8.356		7.677			9.651		10.295		11.206			12.19		8.332		11.85
																				9.802		6.435		7.112			10.298		9.829		13.555			8.465		8.815		16.282
																				9.307		8.389		5.723			10.901		8.89		10.948			10.193		10.276		14.807
																				13.825		8.596		8.78			17.166		9.696		9.593			9.769		9.259		11.588
																				9.749		10.996		8.924			14.417		12.868		10.423			9.164		8.267		14.25
																				9.308		8.39		8.791			15.449		8.189		10.359			10.919		9.553		13.888
																				9.5		9.062		8.582			16.438		9.643		14.154			12.377		10.925		12.809
																				9.118		13.556		8.597			10.986		10.22		11.071			12.325		11.62		12.893
																				9.257		11.256		11.157			18.118		10.566		12.076			11.133		12.376		13.335
																				8.333		10.296		10.856			15.444		14.672		11.175			11.857		11.359		8.465
																				6.945		8.79		10.058			17.416		10.276		10.839			11.753		11.207		7.959
																				10.357		8.626		9.934			12.811		12.53		13.09			12.921		8.483		9.494
																				8.175		10.384		9.743			14.068		10.295		13.358			11.857		8.717		14.913
																				9.09		12.116		10.222			16.676		10.79		7.704			12.261		10.405		13.335
																				12.762		7.791		11.999			12.894		10.707		11.691			9.994		11.625		13.222
																				10.65		13.283		8.356			14.257		10.123		12.702			13.554		6.605		11.236
																				8.692		6.563		8.253			12.032		12.307		13.491			13.244		12.032		11.185
																				8.128		6.385		7.829			11.663		10.22		10.53			11.037		11.426		7.182
																				10.152		6.249		10.959			14.415		11.997		13.59			11.344		9.473		13.394
																				9.82		8.816		8.175			12.602		13.222		10.247			12.691		8.465		12.43
																				10.145		11.613		10.996			16.384		12.304		10.095			9.554		13.318		12.208
																				9.802		11.602		12.744			12.499		12.345		10.173			11.178		9.089		7.336
																				10.47		11.866		9.366			22.691		10.384		10.276			13.426		7.388		13.325
																				10.049		8.435		9.664			10.848		10.948		11.064			8.54		14.812		10.674
																				10.84		11.887		8.241			12.419		8.404		10.781			9.994		11.15		9.338
																				8.703		14.778		10.715			10.662		11.038		9.341			9.117		10.995		14.144
																				9.946		10.22		7.825			8.935		12.182		11.116			11.363		8.717		13.028
																				9.61		8.022		6.39			10.775		6.865		10.457			9.936		10.922		8.962
																				12.401		9.09		8.034			12.031		11.176		12.041			11.388		12.53		9.955
																				7.63		9.101		9.257			12.894		10.095		11.691			13.009		10.298		13.44
																				11.635		12.539		5.252			13.147		12.127		13.32			12.871		10.626		10.211
																				8.805		12.934		10.049			10.187		11.707		18.999			6.446		10.098		13.325
																				12.531		12.129		10.222			14.683		9.923		11.336			13.779		11.061		15.805
																				12.233		9.474		8.081			12.219		10.095		9.187			12.871		7.663		15.184
																				8.102		9.541		9.146			11.267		8.702		10.731			11.396		13.089		16.704
																				8.714		8.332		7.776			9.187		9.816		10.496			12.584		11.625		11.634
																				12.5		11.245		10.153			11.885		8.461		11.778			6.611		11.634		14.7
																				11.743		8.326		9.899			10.01		10.009		8.464			10.926		12.641		13.816
																				12.586		7.776		9.934			16.779		11.018		12.768			10.827		12.14		10.276
																				9		8.39		6.981			16.404		13.347		14.017			15.59		11.443		9.46
																				12.637		8.36		9.281			15.987		12.681		14.499			11.887		8.139		10.614
																				12.098		7.906		7.706			13.301		9.741		9.174			8.465		9.855		12.991
																				9.578		8.466		12.816			12.513		11.864		10.159			13.222		11.493		11.535
																				11.295		7.388		8.816			12.244		10.855		10.65			13.271		9.942		12.376
																				10.769		9.873		13.099			12.244		7.924		11.764			11.185		11.821		10.047
																				9.873		8.951		11.37			13.732		11.21		16.171			13.543		10.276		12.179
																				11.744		9.46		8.718			9.818		9.473		18.424			14.999		8.76		9.429
																				13.681		8.19		8.065			10.934		10.123		13.827			9.494		11.783		9.855
																				14.502		8.761		7.922			14.771		10.566		14.993			12.876		15.561		11.426
																				10.407		10.096		8.963			8.816		9.279		11.679			10.84		10.469		10.208
																				9.03		9.918		8.333			11.288		9.855		13.414			11.692		11.269		8.139
																				10.096		8.425		8.831			9.753		7.147		7.587			11.255		10.158		8.465
																				9.101		7.107		9.542			11.109		10.359		10.697			10.158		9.603		8.24
																				10.997		7.35		9.101			14.846		10.151		16.32			10.714		8.64		12.532
																				9.697		10		7.04			9.917		11.024		11.972			11.14		13.649		12.868
																				11.178		9.099		4.654			9.578		9.008		12.573			13.222		14.743		8.684
																				12.499		8.333		9.844			7.323		9.378		15.238			11.85		11.3		11.612
																				11.866		9.287		9.101			11.83		13.679		10.613			8.715		12.731		9.553
																				12.93		10.738		9.353			8.862		8.127		10.357			14.39		13.378		7.503
																				11.473		9.484		8.485			12.307		5.94		16.127			8.465		11.968		9.61
																				12.93		8.466		11.583			12.869		8.127		12.305			11.759		9.099		10.781
																				9.595		7.589		7.922			15.543		14.508		12.218			12.452		11.864		12.374
																				9.595		7.475		10.02			12.981		10		16.691			11.037		10.545		12.376
																				12.121		6.707		8.241			10.302		8.389		12.618			11.004		15.534		13.435
																				11.178		8.333		6.11			9.934		8.789		9.46			13.384		12.307		11.928
																				9.896		8.303		8.704			11.448		8.048		15.692			12.809		14.994		14.126
																				11.428		7.227		8.081			12.337		9.577		14.942			9.372		11.446		15.74
																				10.001		8.39		11.403			14.994		9.389		10.375			12.417		12.417		9.54
																				8.541		9.712		10.935			11.958		12.135		14.143			9.994		11.207		9.945
																				11.512		8.268		9.611			12.823		9.365		7.949			9.577		12.369		11.778
																				12.327		9.674		7.359			10.248		14.213		14.864			9.769		13.88		8.24
																				10.096		10.187		7.589			9.099		5.558		10.855			7.466		15.303		7.358
																				12.643		9.46		7.337			8.924		6.329		12.772			18.174		9.696		12.458
																				11.445		14.911		8.586			13.28		11.038		10.613			9.156		12.376		12.618
																				9.611		7.389		6.894			10.864		7.284		8.405			11.21		10.076		11.653
																				10.739		7.906		9.37			12.53		8.02		9.337			11.581		9.846		12.304
																				10.159		7.389		11.671			6.773		12.085		9.576			6.446		8.833		10.161
																				12.575		7.676		8.218			13.605		13.009		11.087			8.38		12.127		10.957
																				12.066		8.093		9.896			7.837		11.024		10.147			14.763		12.077		11.579
																				11.403		13.04		8.515			14.437		9.338		8.266			9.577		12.179		12.242
																				9.664		9.117		8.175			13.385		8.951		9.46			14.768		8.146		12.573
																				10.865				7.337			10.361		10.405		8.634			11.356		8.951		9.523
																				13.118				8.714			11.208		12.179		9.54			9.908		10.405		8.389
																				9.595		10.604		7.776			11.56		11.178		12.529			16.26		9.368		10.611
																				10.544		8.574		7.841			8.923		9.46		17.81			15.372		9.513		16.287
																				8.364		9.71		8.541			9.895		9.145		12.304			11.538		13.222		9.751
																				8.877		9.525		9.674			13.117		10.864		10.248			12.86		7.63		11.677
																				10.541		9.15		9.75			10.697		11.201		11.445			14.052		8.127		15.427
																				9.101		7.576		6.664			9.946		11.557		10.863			8.189		10.781		9.751
																				10.001		7.475		7.454			12.244		11.207		9.611			15.114		11.404		11.633
																				15.757		13.03		9.899			10.221		12.972		9.609			12.893		10.713		12.135
																				14.438		11.302		9.555			10.385		10.359		8.573			11.056		9.186		9.266
																				11.668		9.308		9.461			9.674		14.637		12.021			13.384		7.474		11.13
																				11.614		11.712		8.597			8.574		7.791		11.611			13.037		10.173		17.818
																				8.333		10.613		11.313			8.484		11.244		14.58			12.167		14.563		10.095
																				10.159		10.109		15.13			6.795		11.107		8.595			10.497		7.795		18.233
																				11.344		11.999		7.576			9.873		14.436		13.488			13.48		6.893		12.977
																				9.611		9.578		9.118			11.766		13.665		8.584			8.189		10.948		11.885
																				9.143		7.475		10.64			12.454		10.448		9.642			11.692		8.919		10.53
																				8.345		7.505		13.164			18.129		12.618		9.342			10.919		9.429		8.595
																				14.39		8.597		9.934			11.955		13.385		7.725			10.393		11.968		12.641
																				12.676		7.97		13.208			10.395		16.308		8.83			11.971		12.873		13.318
																				11.709		8.425		8.626			13.921		9.932		10.505			9.651		10.957		8.789
																				10.275		10.209		10.361			14.19		11.176		9.957			12.584		10.173		11.107
																				10.739		9.947		10.278			8.715		10.713		8.241			12.486		10.019		9.643
																				9.101		10.959		14.067			14.365		9.422		7.458			10.559		10.713		15.442
																				9.947		8.838		13.125			11.038		8.815		10.211			15.94		10.781		14.126
																				11.693		8.253		9.664			18.841				9.46			11.741		9.389		9.31
																				9.985		7.454		10.001			11.514				10.211			12.359		10.136		12.325
																				9.146		8.791		9.174			12.607		12.079		9.712			11.759		9.855		18.072
																				10.275		6.796		9.146			13.385		9.924		9.54			12.948		14.108		11.512
																				10.398		9.461		9.188			8.093		9.644		6.078			10.847		7.981		12.21
																				9.873		6.548		9.353			10.984		11.302		7.884			13.394		10.457		10.53
																				10.162		9.645		12.409			13.899		11.414		9.541			15.525		10.095		16.778
																				8.156		9.896		9.611			10.415		9.393		10.05			14.011		13.232		10.057
																				8.28		8.253		10.159			12.419		10.531		11.492			12.921		12.771		8.962
																				9.38		7.589		8.333			13.142		7.981		11.744			14.052		10.71		11.634
																				9.611		9.525		9.143			9.03		10.64		9.8			12.498		9.368		9.61
																				8.92		10.222		8.222			14.211		7.184		11.904			13.384		10.211		12.893
																				8.571		9.664		10.25			12.894		10.406		16.892			12.77		10.647		12.307
																				8.924		11.089		8.36			11.134		8.574		13.77			15.372		12.43		13.527
																				9.288		9.343		8.329			12.939		15.353		13.212			13.384		14.108		10.009
																				10.361		10.739		11.744			11.779		12.532		8.358			12.377		12.182		8.951
																				9.146		8.541		12.126			10.499		11.062		7.827			15.904		11.989		10.614
																				9.343		6.931		9.122			12.607		12.733		14.544			13.442		8.702		11.412
																				11.863		6.945		9.339			10.499		12.623		12.62			14.047		11.13		19.943
																				8.834		8.364		15.611			18.567		13.386		8.139			12.137		11.691		9.085
																				11.437		7.067		12.417			13.428		13.164		12.465			15.147		11.173		10.707
																				8.018		8.241		9.674			12.139		10.398		13.028			12.635		10.614		10.602
																				11.257		9.38		11.866			13.028		9.843		15.405			17.102		10.497		11.557
																				9.74		8.053		10.349			13.92		8.484		12.323			12.948		8.702		10.298
																				13.04		8.831		12.603			13.752		12.328		15.278			14.568		12.55		10.375
																				11.512		8.241		9.595			14.544		10.052		11.177			10.395		10.497		12.114
																				9.74		8.834		11.852			12.574		11.999		9.71			10.687		10.22		11.038
																				12.532		7.505		9.847			10.802		15.097		13.752			8.337		7.904		12.649
																				7.072		8.515		11.288			13.418		13.326		10.349			12.921		11.85		11.936
																				9.505		7		8.931			10.249		16.752		13.66			13.168		7.981		9.603
																				9.847		7.285		6.735			13.688		10.211		12.939			10.443		11.255		15.697
																				9.555		6.664		11.801			11.711		12.854		11.064			14.999		7.609		8.573
																				10.395		8.356		11.406			8.485		12.756		14.127			18.73		8.127		11.426
																				12.023		9.645		11.866			10.096		10.449		14.682			15.014		8.804		10.359
																				11.336		5.767		10.222			12.244		9.71		14.717			15.813		12.428		10.405
																				7.982		9.818		9.475			11.203		13.638		11.655			17.052		7.231		11.363
																				9.312		6.669		8.953			8.052		11.13		13.366			13.862		11.061		12.948
																				7.324		7.018		6.894			8.065		9.177		11.097			14.415		9.738		12.03
																				8.704		7.32		9.353			9.985		13.965		11.472			12.137		10.713		8.922
																				8.78		7.922		12.562			12.376		14.351		7.981			17.565		10.101		11.85
																				7.359		4.959		9.451			7.475		11.755		8.597			11.887		16.14		14.909
																				9.753		8.78		10.222			12.855		11.532		13.494			14.23		12.771		8.048
																				10.544		6.866		9.674			10.738		16.752		12.538			10.926		10.854		10.298
																				13.714		7.829		9.743			10.709		12.315		13.512			10.84		11.85		15.708
																				8.92		6.707		9.924			10.647		13.974		12.064			15.071		13.468		13.543
																				10.604		6.606		10.459			13.529		8.343		8.963			10.599		10.713		17.111
																				9.461		7.902		10.52			8.892		10.64		8.633			12.498		12.324		11.885
																				10.733		8.364		6.945			14.42		12.895		10.603			11.513		12.671		12.281
																				8.762		10.712		10.935			15.981		8.049		13.662			12.072		13.125		11.141
																				10.222		8.762		11.852			11.999		7.921		11.312			13.335		12.971		11.024
																				11.089		7.139		10.865			10.051		10.459		10.603			10.606		13.069		13.859
																				10.052		6.079		13.744			10.518		9.148		12.129			12.937		13.741		15.247
																				11.445		8.485		12.419			10.957		11.823		10.567			13.543		12.671		15.649
																				10.499		8.065		10.571			11.766		8.614		10.174			13.654		14.786		11.559
																				11.175		7.505		11.999			12.077		14.911		12.134			13.314		10.497		14.072
																				8.485		9.71		10.159			8.834		11.004		12.156			11.444		8.64		15.119
																				10.175		8.28		12.391			8.78		9.873		11.611			15.071		10.545		13.385
																				10.628		7.228		14.624			11.709		10.173		14.687			7.618		11.155		15.363
																				8.364		8.704		12.43			11.671		10.434		10.311			10.08		14.853		12.417
																				9.257		7.902		11.906			13.86		8.049		16.455			9.651		12.618		16.187
																				8.018		6.981		11.384					7.981		15.013			14.31		12.181		11.968
																				9.71		5.419		12.309					9.594		10.375			10.228		13.961		15.697
																				7.726		10.386		9.26					11.882		12.467			11.082		10.101		10.384
																				7.492		7.61		13.03			13.25		10.878		14.86			14.918		12.613		11.707
																				9.595		6.64		11.157			13.593		11.928		9.602			13.384		12.909		10.375
																				7.337		7.564		9.525			11.178		10.676		10.856			10.626		12.868		12.671
																				8.081		6.664		12.306			8.716		10.518		8.331			6.856		11.815		14.787
																				15.798		5.307		8.364			11.186		7.904		13.898			10.228		10.871		10.276
																				15.03		8.626		10.349			12.772		12.116		13.276			12.486		10.497		10.79
																				12.169		7.148		13.366			13.962		9.984		12.849			10.228		9.144		11.957
																				12.923		8.345		15.578			13.655		11.202		10.613			13.314		10.712		11.244
																				16.285		8.791		16.6			13.717		9.831		13.413			15.203		9.636		11.471
																				13.251		8.747		9.488			10.194		9.817		11.959			14.744		8.789		12.208
																				12.169		9.697		11.967			12.19		12.337		10.935			14.25		8.251		16.835
																				11.858		4.901		10.361			9.844		11.784		13.662			14.065		11.299		11.312
																				17.142		7.926		10.959			12.699		12.672		16.257			14.065		13.346		16.159
																				11.534		7.35		13.994			12.19		13.347		13.77			13.038		9.751		9.46
																				9.556		7.982		14.561			11.662		10.897		11.18			12.14		9.31		12.537
																				10.06		11.459		12.676			12.878		9.661		6.663			11.74		7.888		9.186
																				10.081		8.762		11.025			14.489		10.888		10.9			13.63		7.86		14.026
																				9.366		7.722		9.985			12.517		10.595		13.349			16.185		10.863		13.363
																				9.473		9.743		10.159			12.079		9.817		12.323			14.341		11.652		18.421
																				10.444		10.783		9.818			12.81		11.966		13.63			14.639		11.799		16.922
																				9.996		11.271		12.532			9.282		12.232		13.774			10.611		9.799		9.305
																				9.533		11.109		7.108			12.098		9.104		12.883			9.816		11.4		12.067
																				10.06		11.655		7.589			11.614		10.603		14.244			13.213		14.386		10
																				10.187		14.236		9.118			10.709		9.339		15.843			14.387		9.337		10.65
																				11.792		9.74		9.857			10.06		11.532		8.816			10.123		9.993		13.089
																				9.844		9.009		7.572			10.92		13.174		8.586			11.255		10.157		10.347
																				9.873		7.144		14.791			8.999		8.049		11.774			13.162		8.048		7.084
																				8.584		11.766		13.716			12.586		9.009		8.049			11.904		7.675		13.028
																				12.699		7.922		11.459			12.87		10.761		9.923			11.334		12.641		10.737
																				10.396		9.611		10.052			15.906		12.141		7.677			13.038		9.819		11.342
																				7.878		11.561		11.37			14.57		8.633		9.28			10.626		8.745		9.894
																				9.96		10.109		10.839			13.428		8.359		8.332			10.781		11.989		10.375
																				8.741		10.212		13.416			12.923		10.359		5.722			9.089		8.614		9.31
																				8.741		8.485		19.851			12.079		11.733		6.856			12.932		12.879		8.944
																				10.194		8.345		11.755			12.876		11.288		7.906			9.651		10.157		9.871
																				7.351		10.312		10.194			11.255		14.227		11.612			11.971		8.139		10.35
																				11.006		9.501		14.055			13.677		12.539		11.267			17.82		8.266		10.737
																				7.96		7.861		6.826			14.055		12.631		14.561			15.917		9.738		8.389
																				9.771		13.614		13.387			11.531		11.627		10.174			15.147		12.4		9.8
																				9.938		10.544		14.877			13.249		11.389		6.45			11.741		10.097		7.491
[truncated: 2,699 more rows]
[truncated: 4 more columns]
