# Supplementary material for: Lifelong regeneration of cerebellar Purkinje cells after induced cell ablation in zebrafish
Source: eLife journal article supplement (doi:10.7554/elife.79672), 2023-04-12
Supplement: supp [file elife-79672-supp-v1.zip]

**A** % of PCs (mean 2 independent ablations from OKR test)

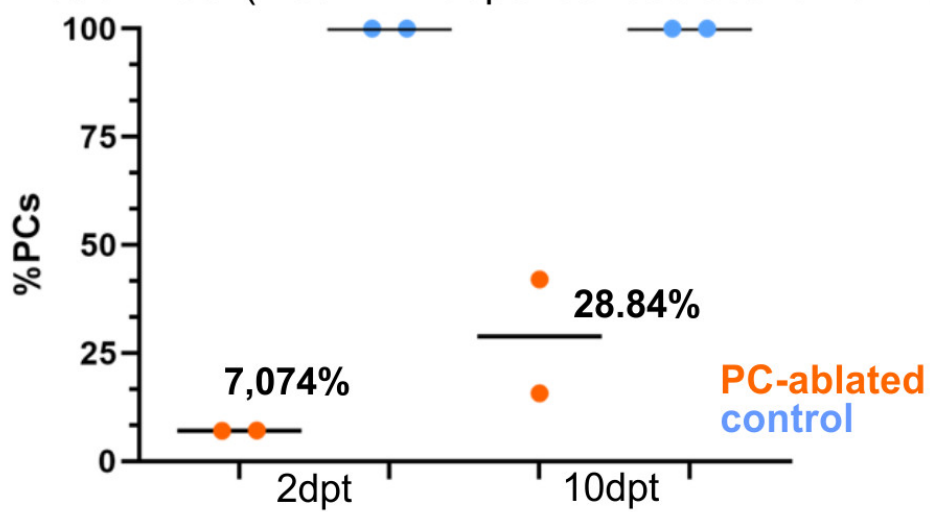

**B** % of PCs (mean 4 independent PC ablations from free swimming test)

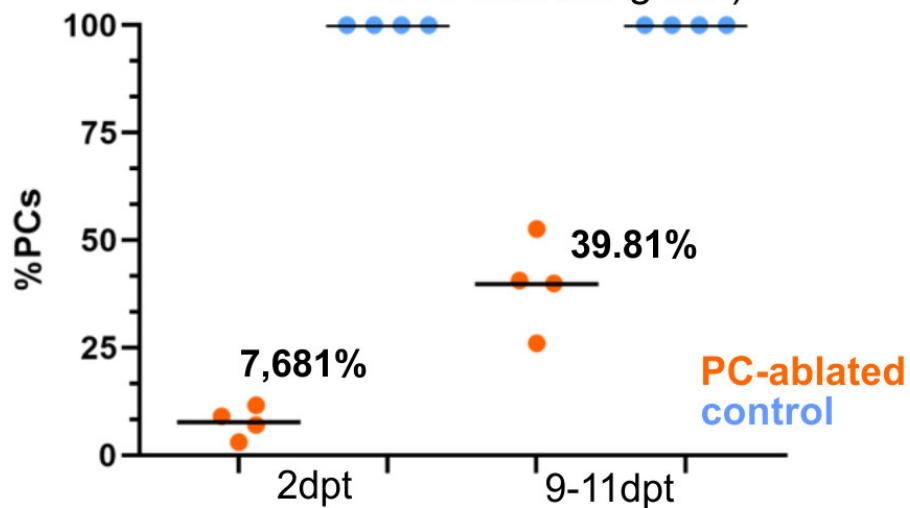

Figure 4-figure supplement 1
