# Supplementary figures and images for: Lifelong regeneration of cerebellar Purkinje cells after induced cell ablation in zebrafish
Source: eLife journal article supplement (doi:10.7554/elife.79672), 2023-04-12

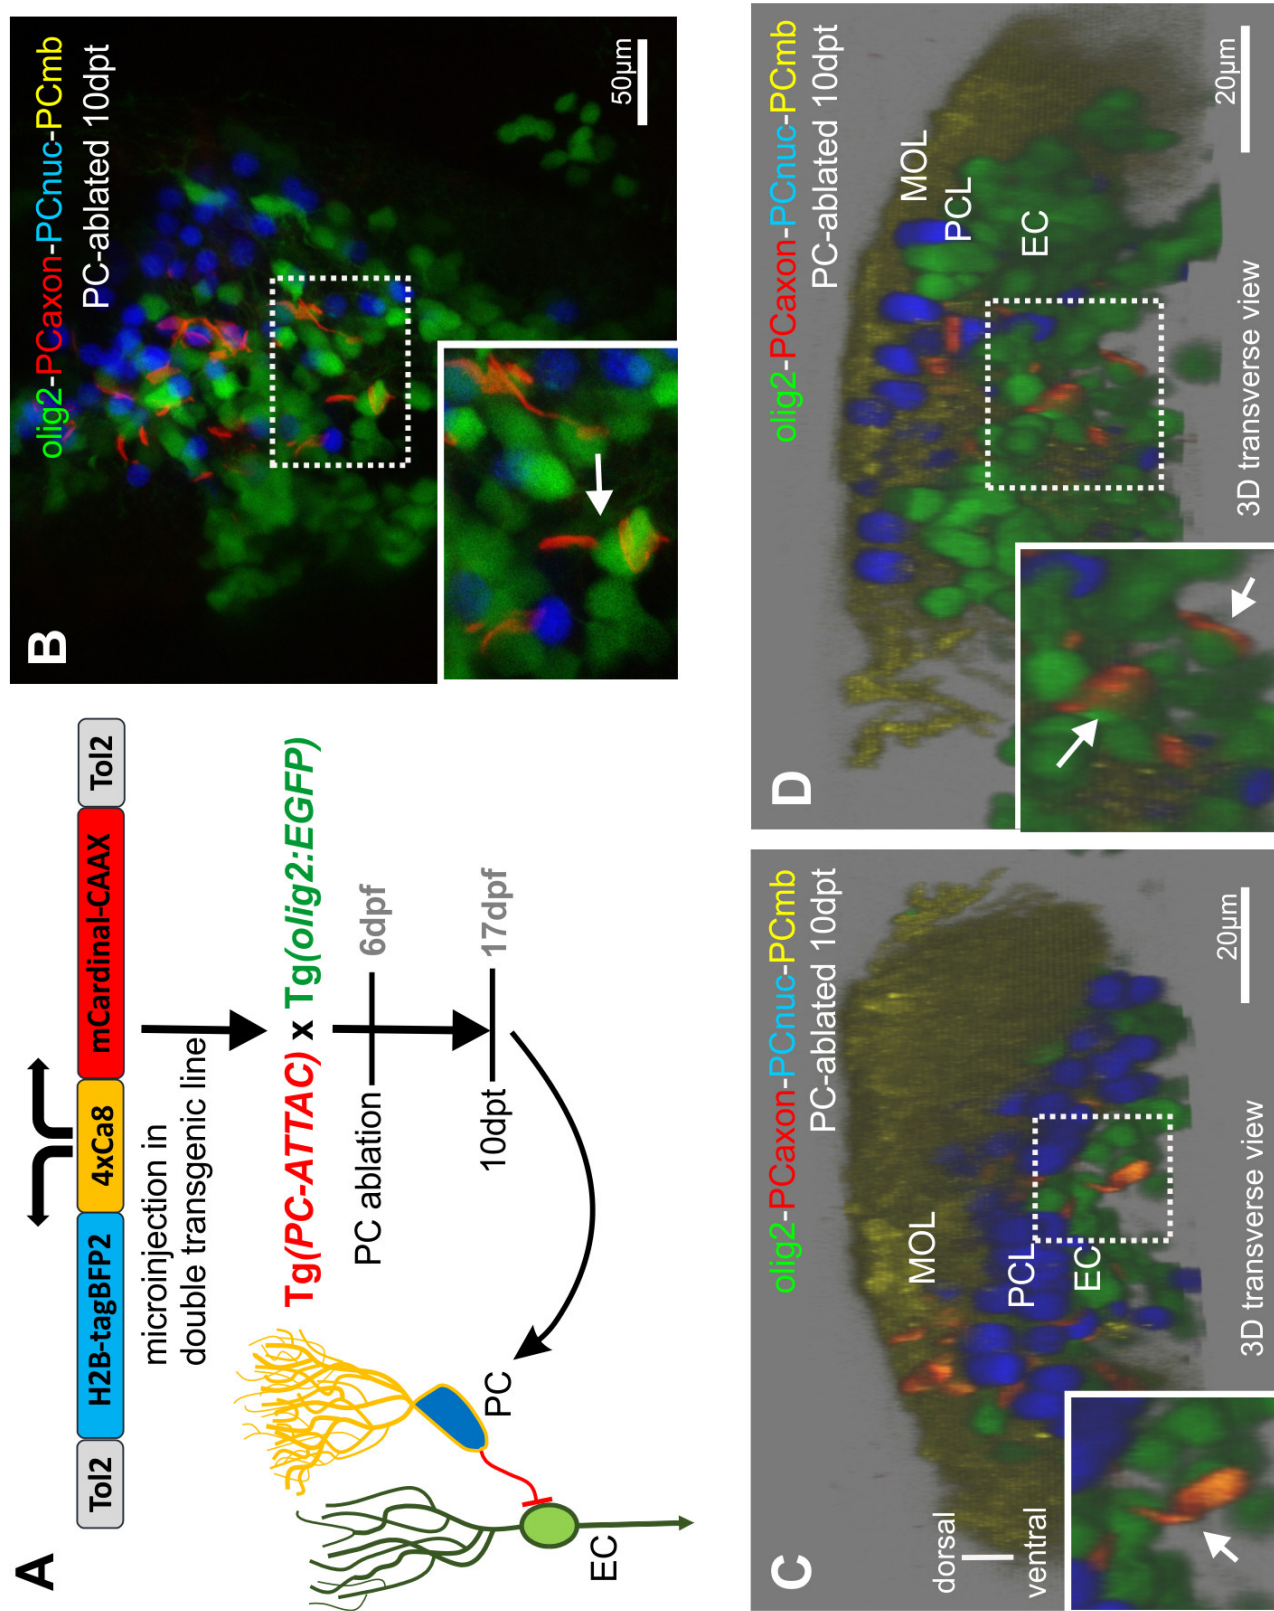

Figure 3-figure supplement 5

Supplement: supp [file elife-79672-supp-v1.zip]

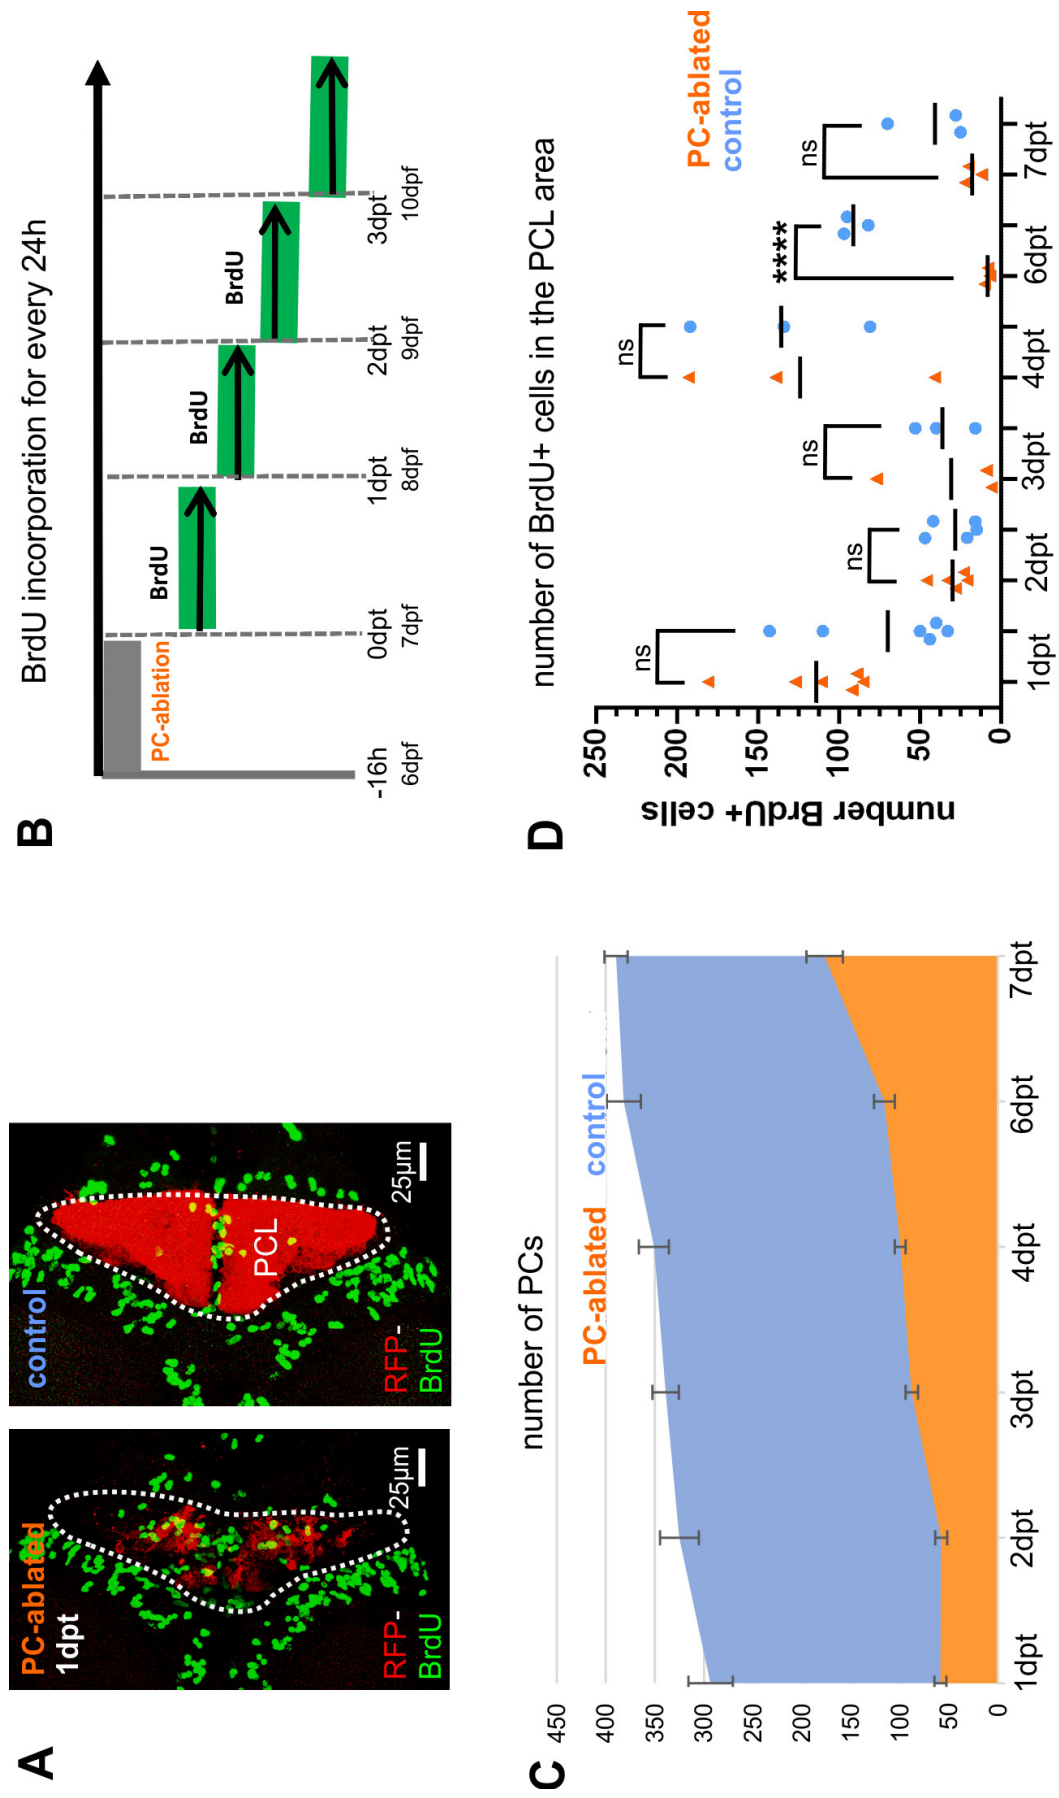

Figure 1-figure supplement 2

Supplement: supp [file elife-79672-supp-v1.zip]

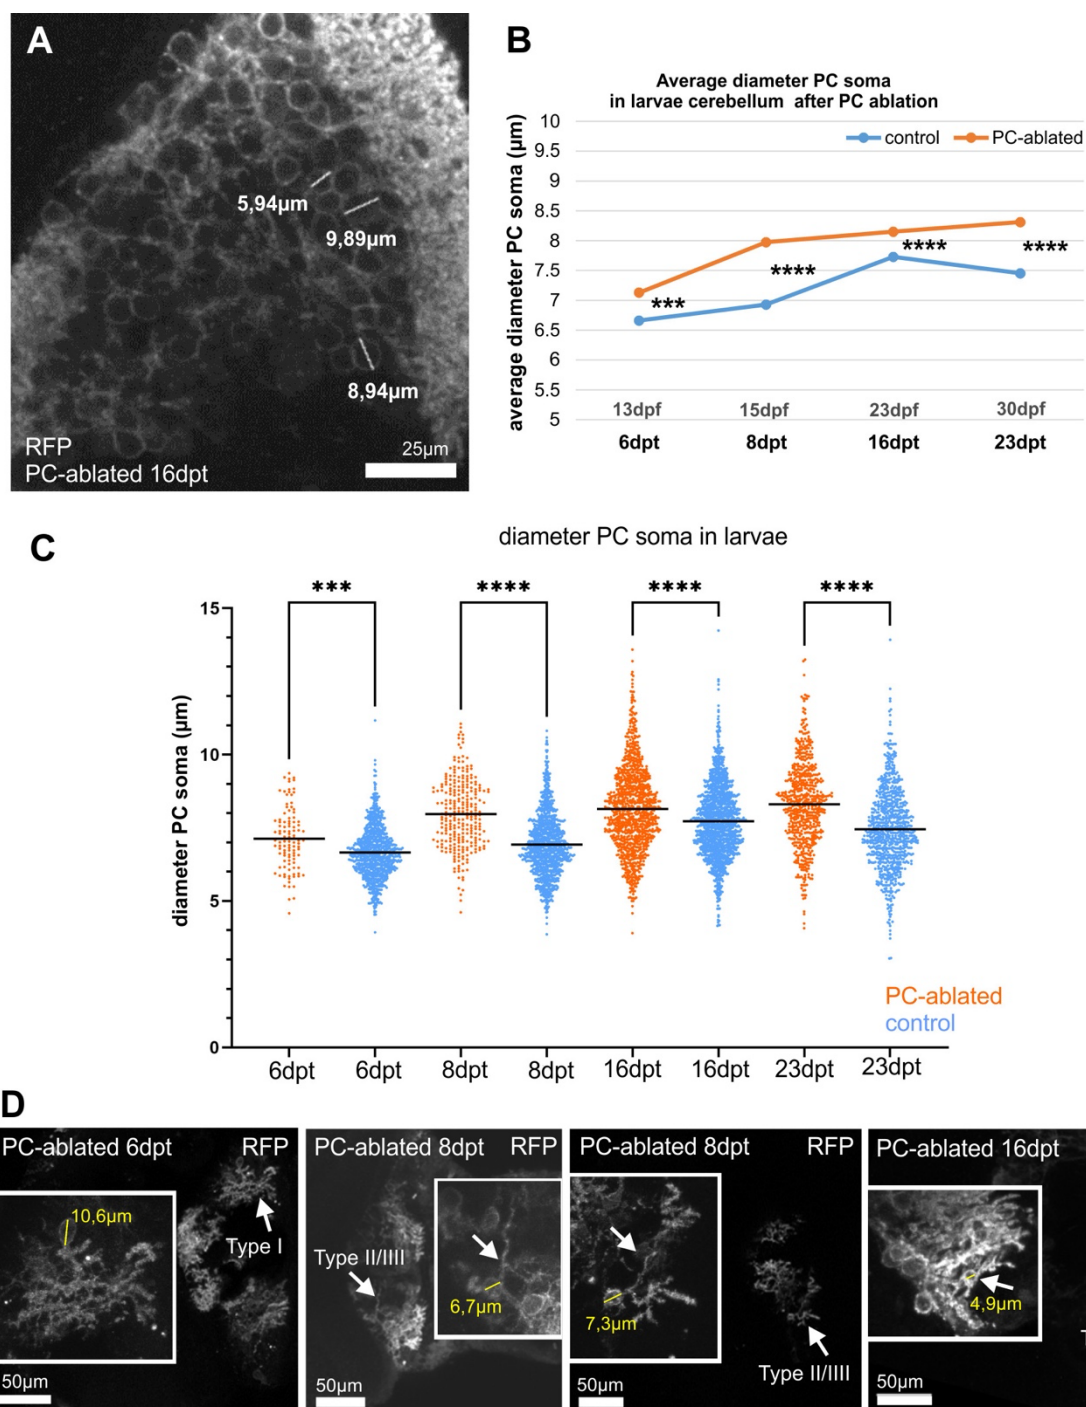

Figure 7-figure supplement 2

Supplement: supp [file elife-79672-supp-v1.zip]

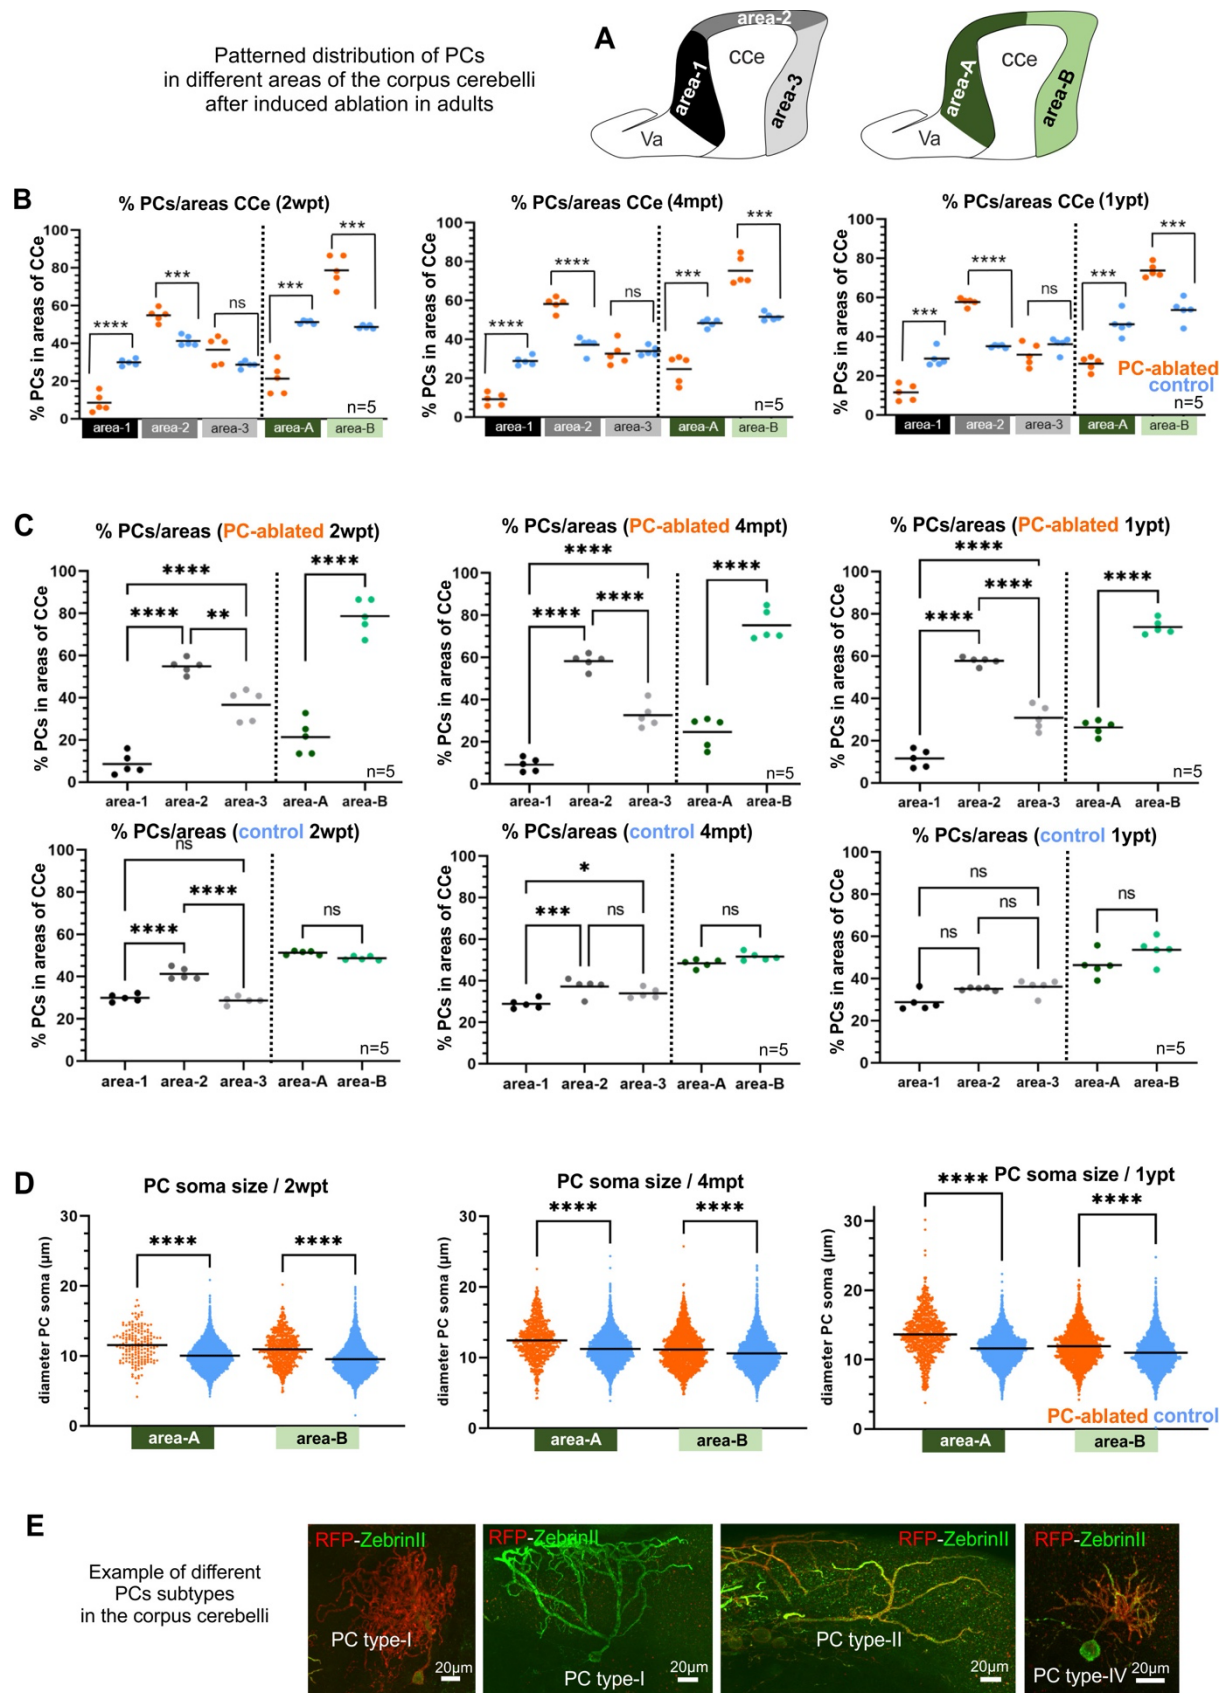

Figure 7-figure supplement 1

Supplement: supp [file elife-79672-supp-v1.zip]

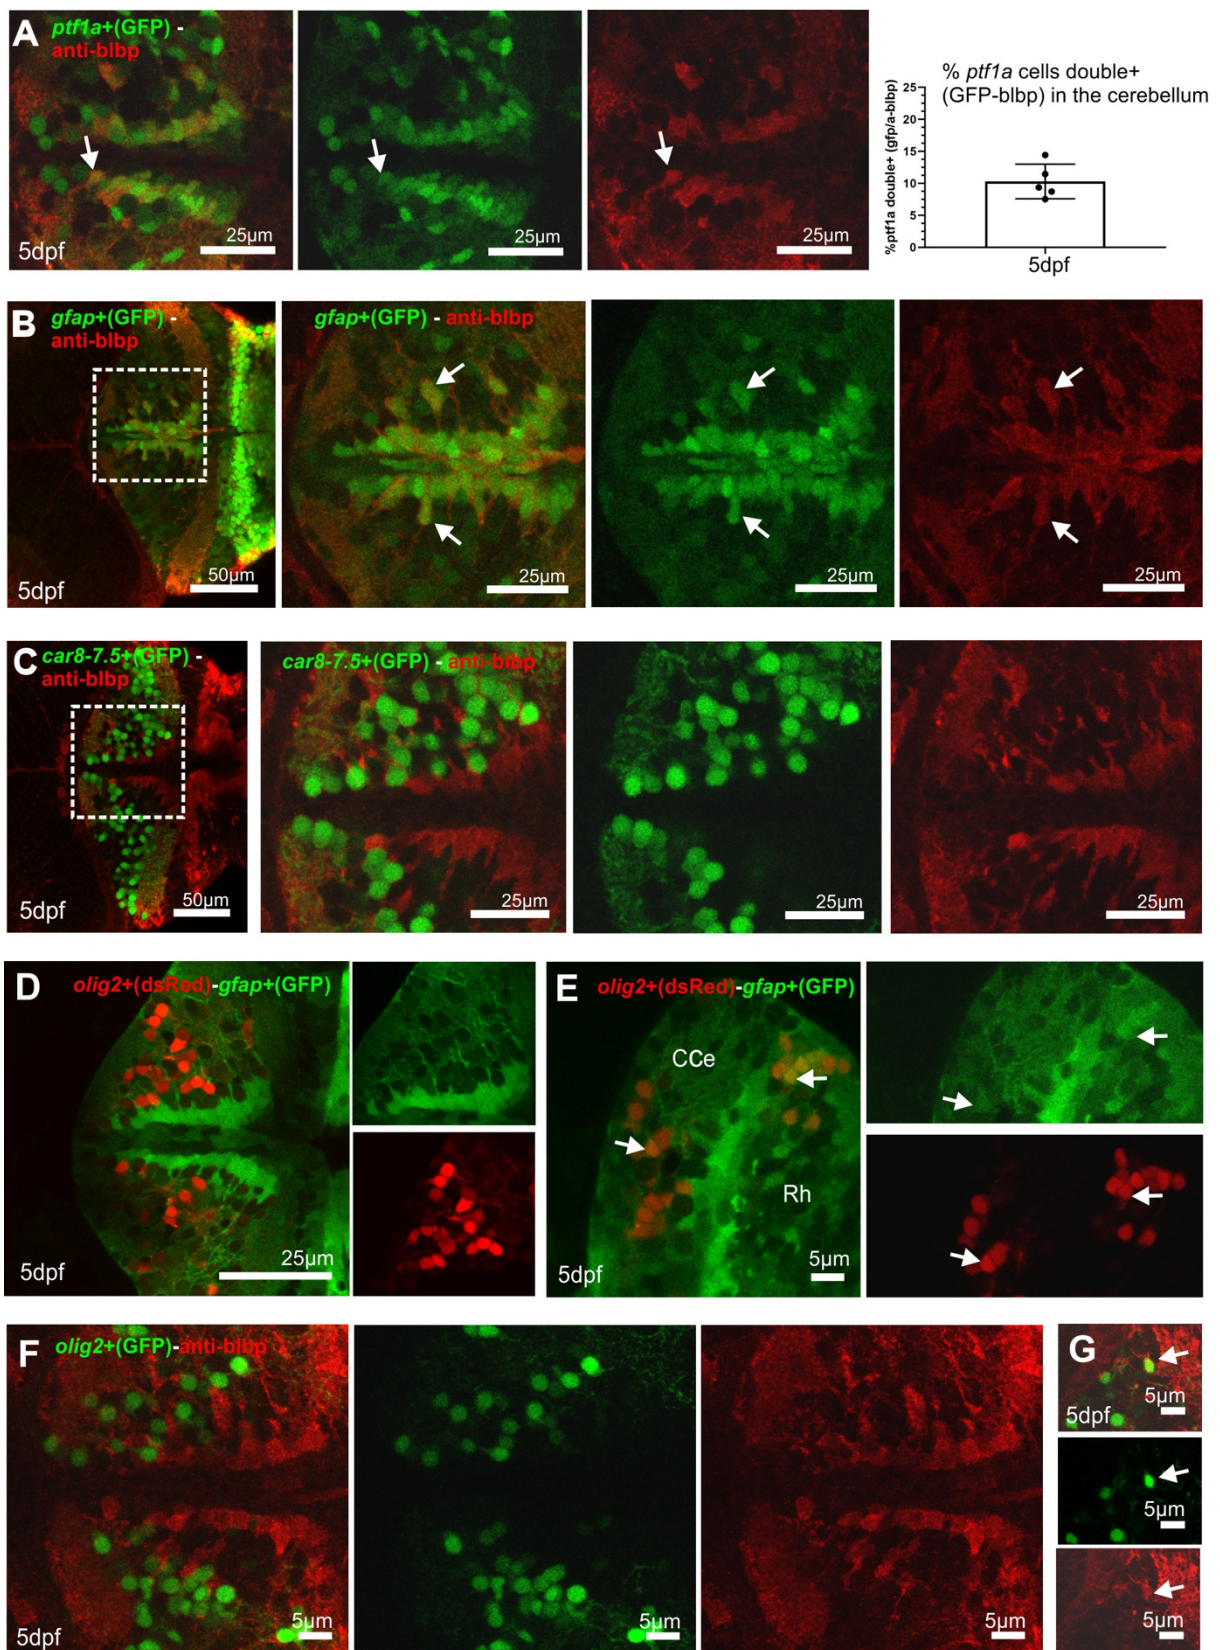

Figure 2-figure supplement 1

Supplement: supp [file elife-79672-supp-v1.zip]

### Degeneration and regeneration of the cerebello-vestibular tract

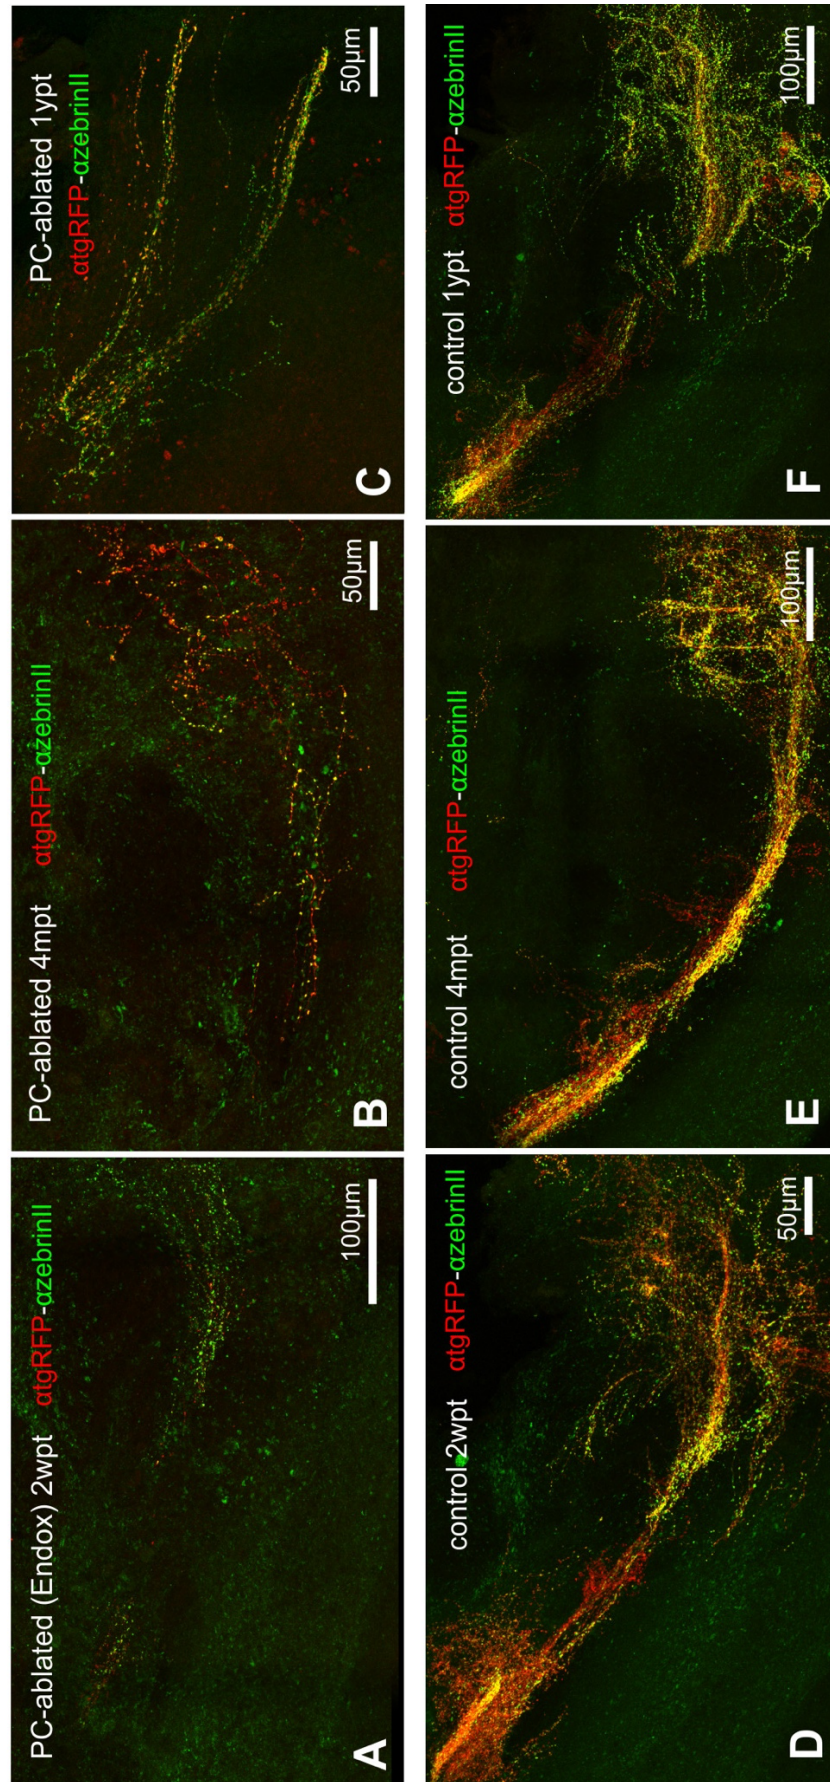

Figure 6-figure supplement 3

Supplement: supp [file elife-79672-supp-v1.zip]

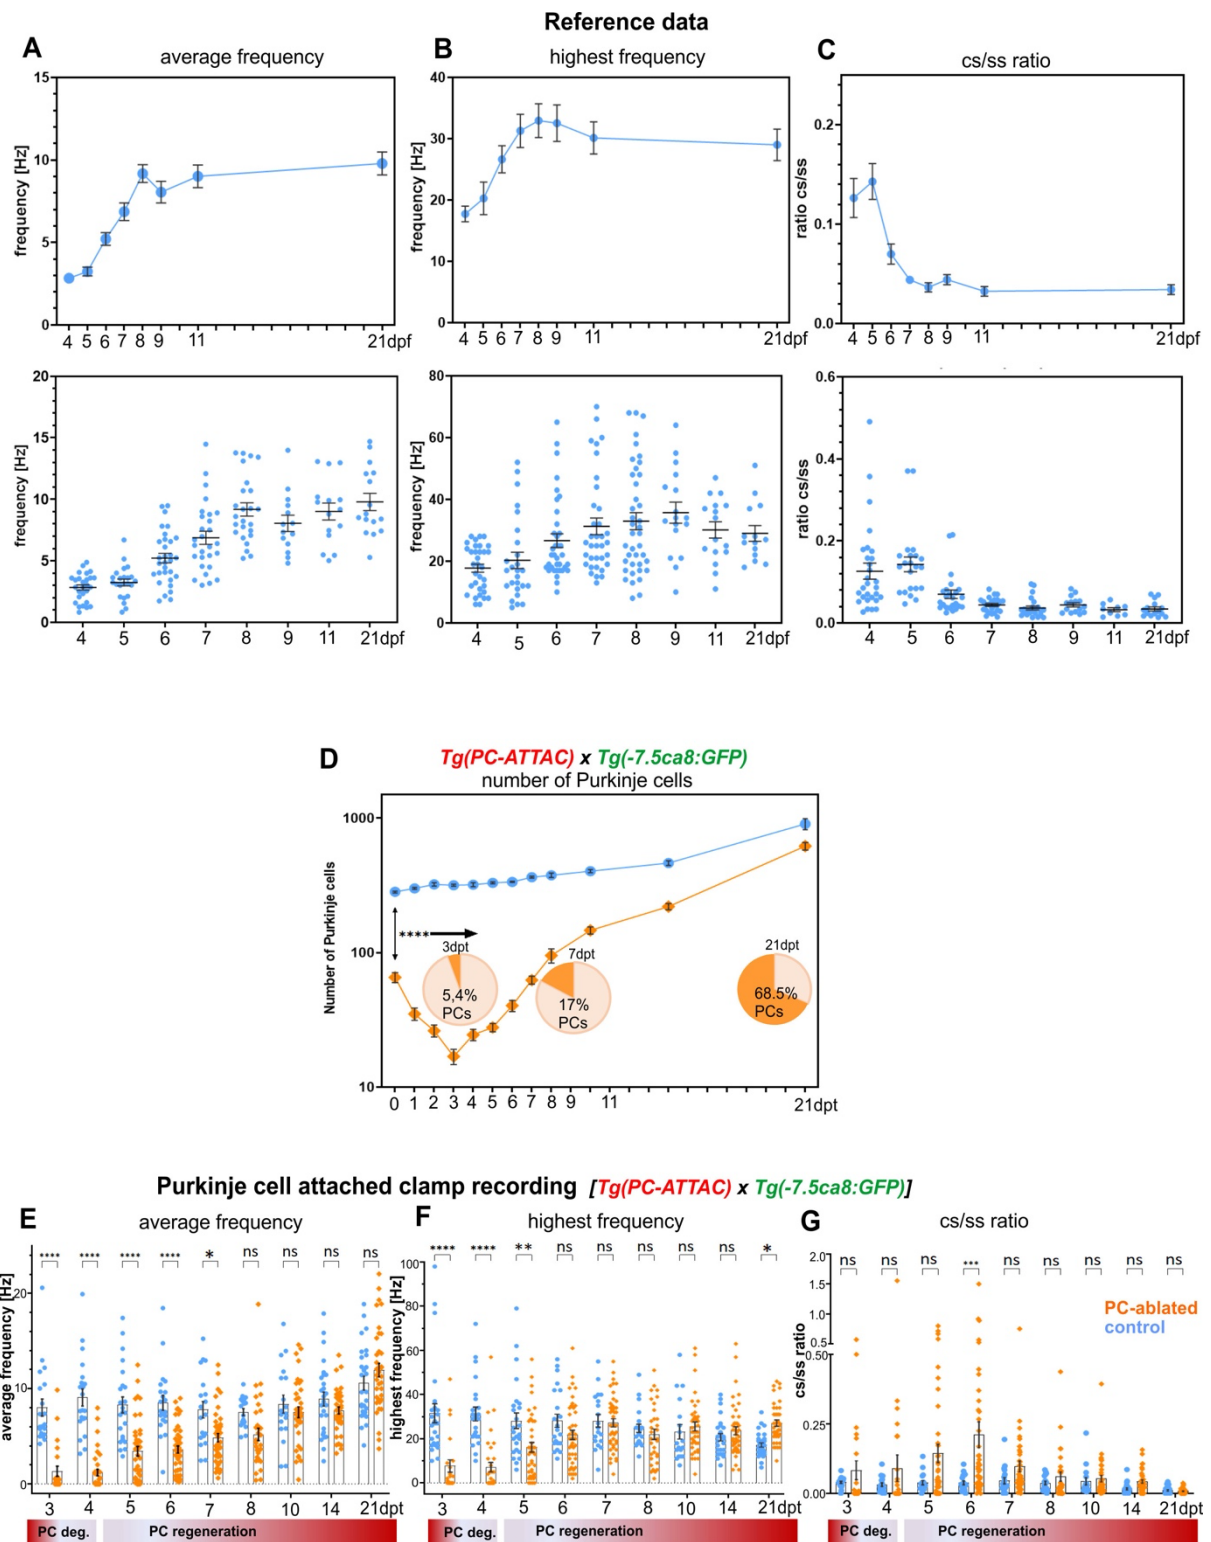

Figure 3-figure supplement 1

Supplement: supp [file elife-79672-supp-v1.zip]

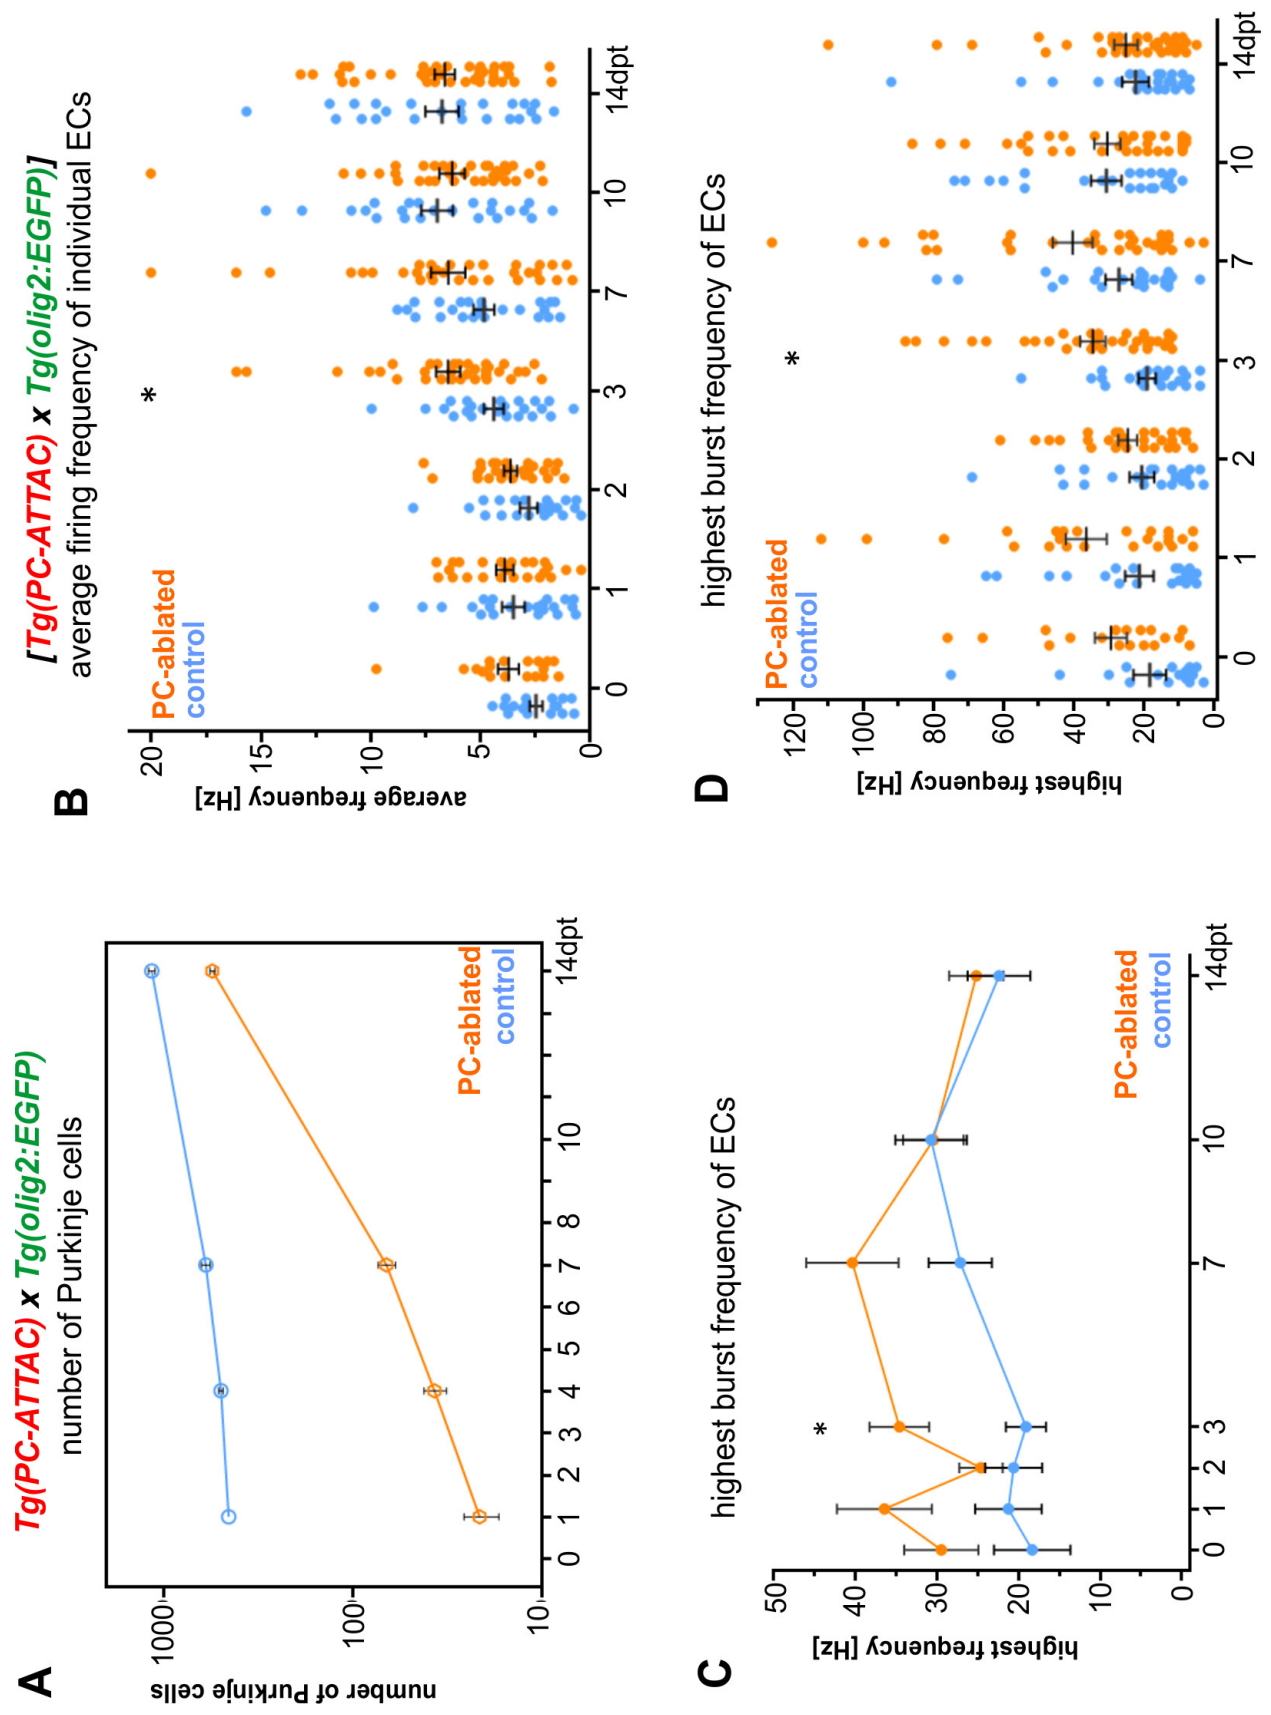

Figure 3-figure supplement 4

Supplement: supp [file elife-79672-supp-v1.zip]

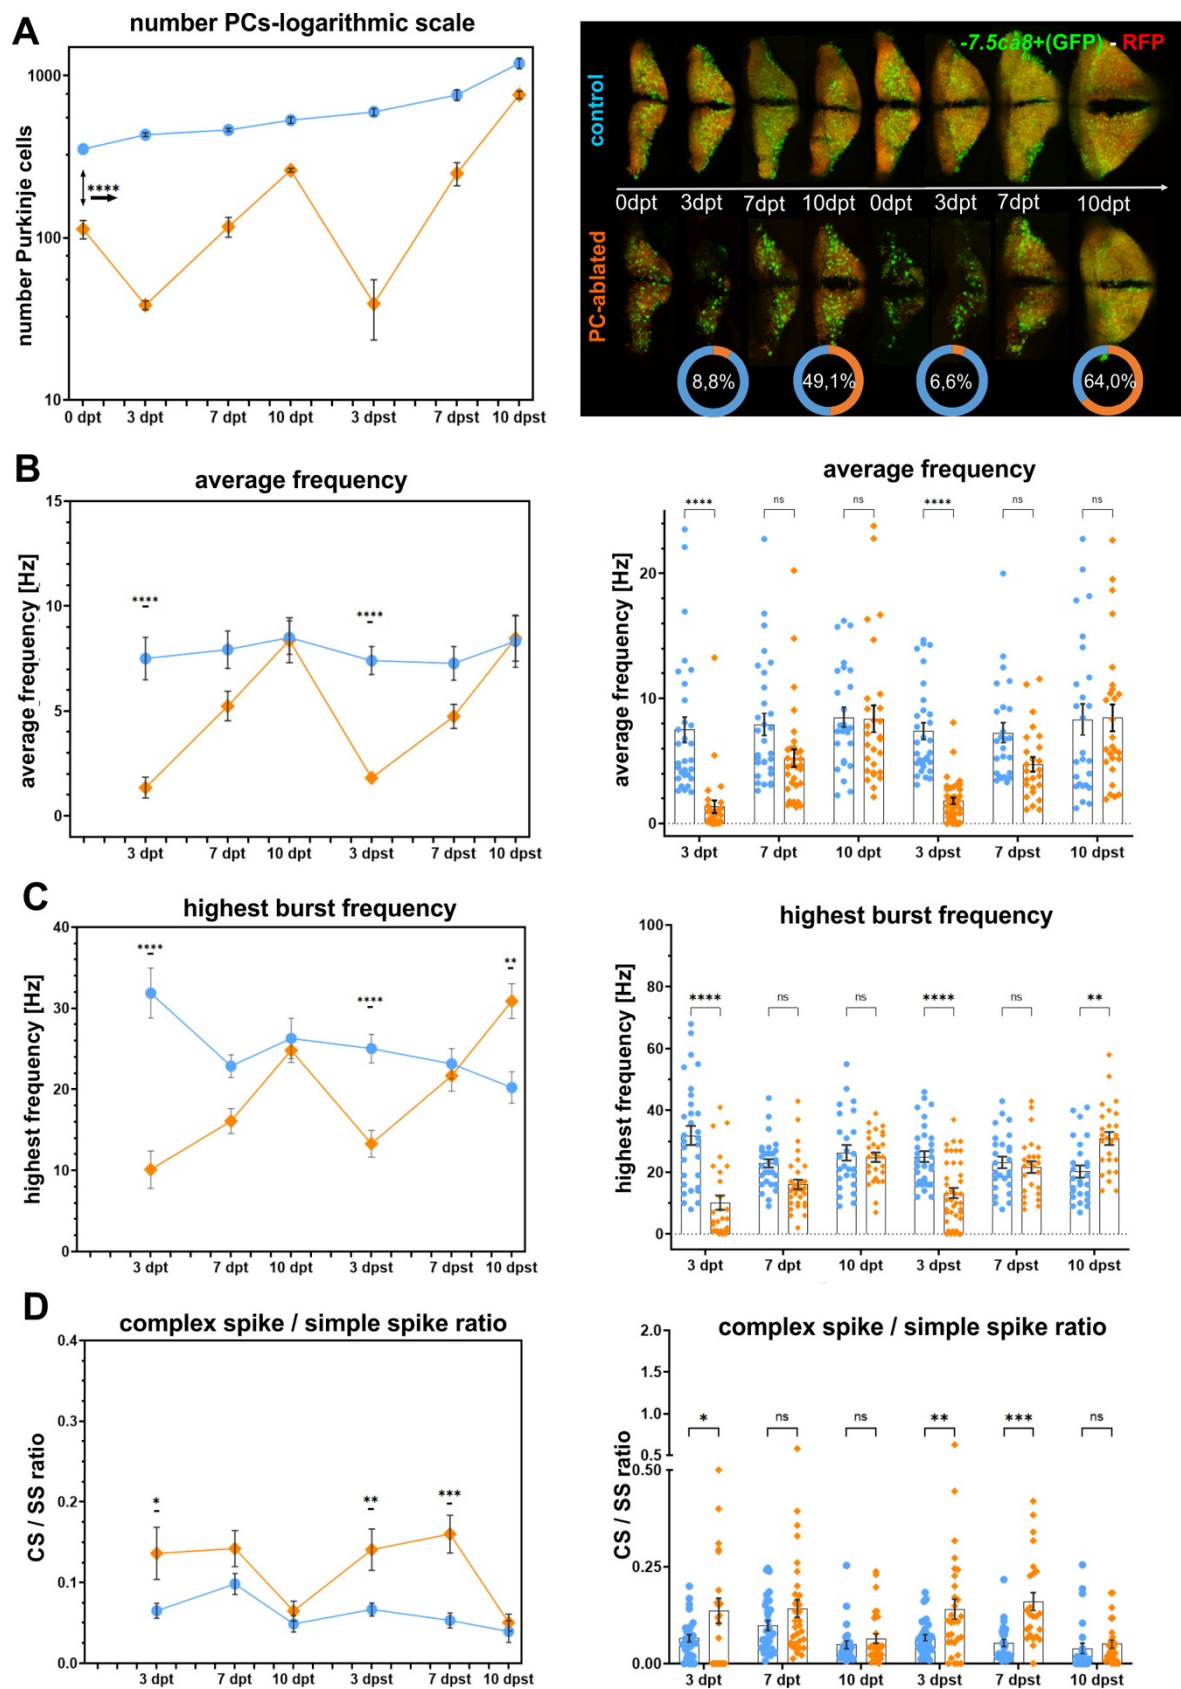

Figure 3-figure supplement 2

Supplement: supp [file elife-79672-supp-v1.zip]

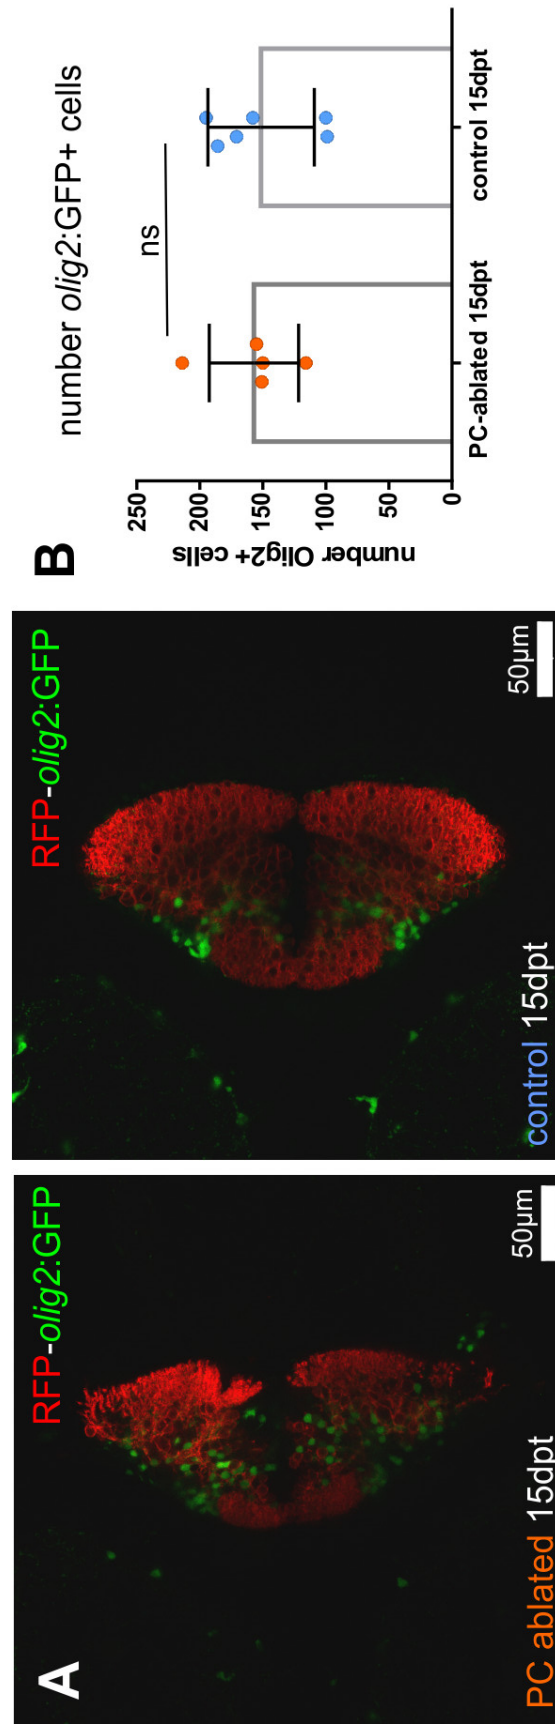

Figure 3-figure supplement 3

Supplement: supp [file elife-79672-supp-v1.zip]

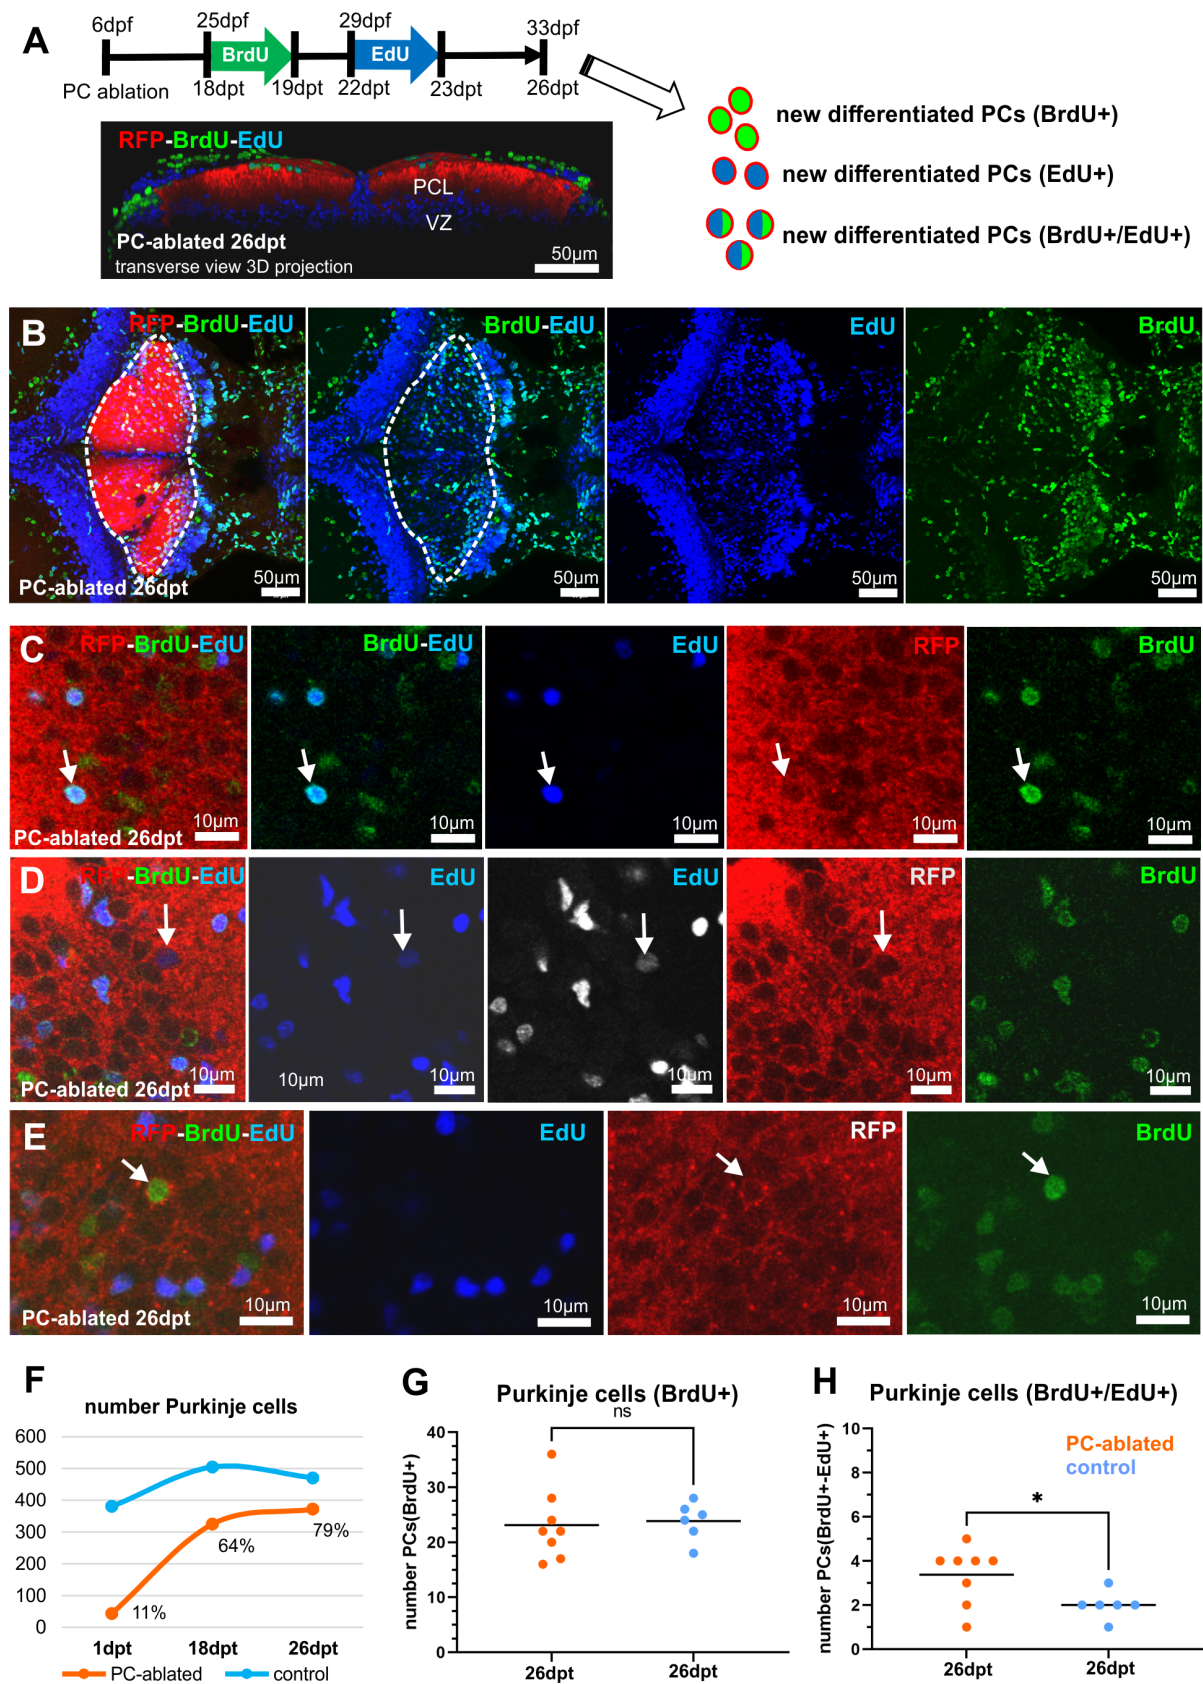

Figure 1-figure supplement 3

Supplement: supp [file elife-79672-supp-v1.zip]

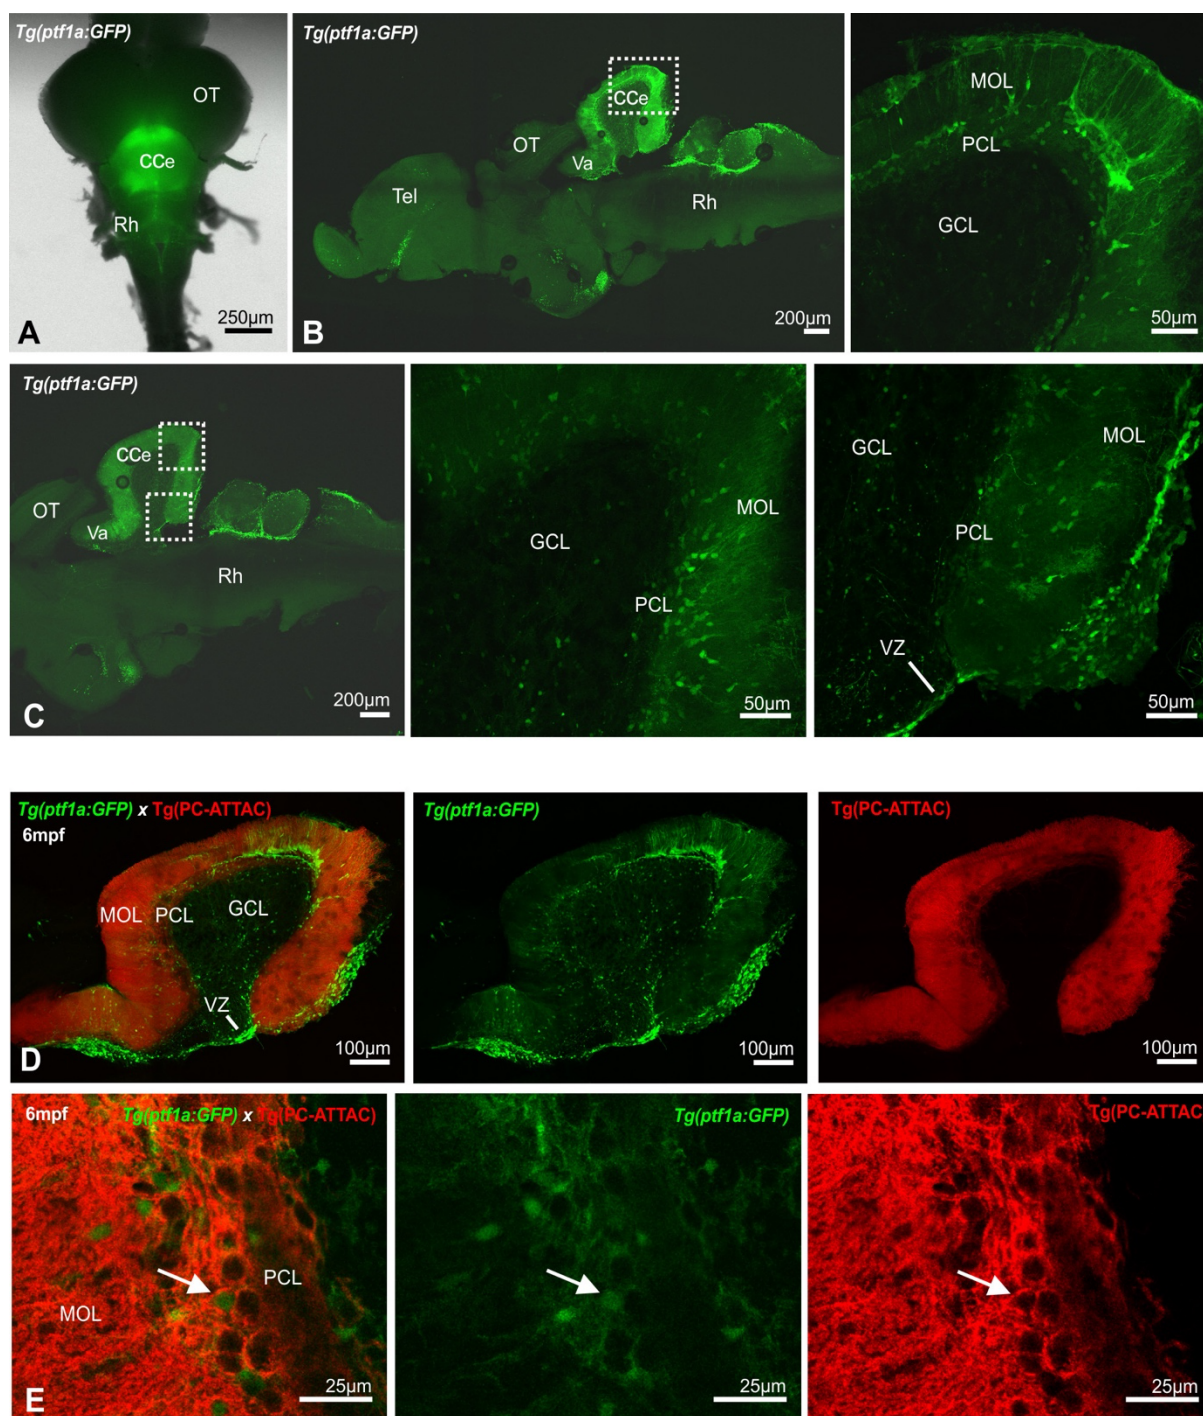

Figure 6-figure supplement 2

Supplement: supp [file elife-79672-supp-v1.zip]

Figure 2-figure supplement 2

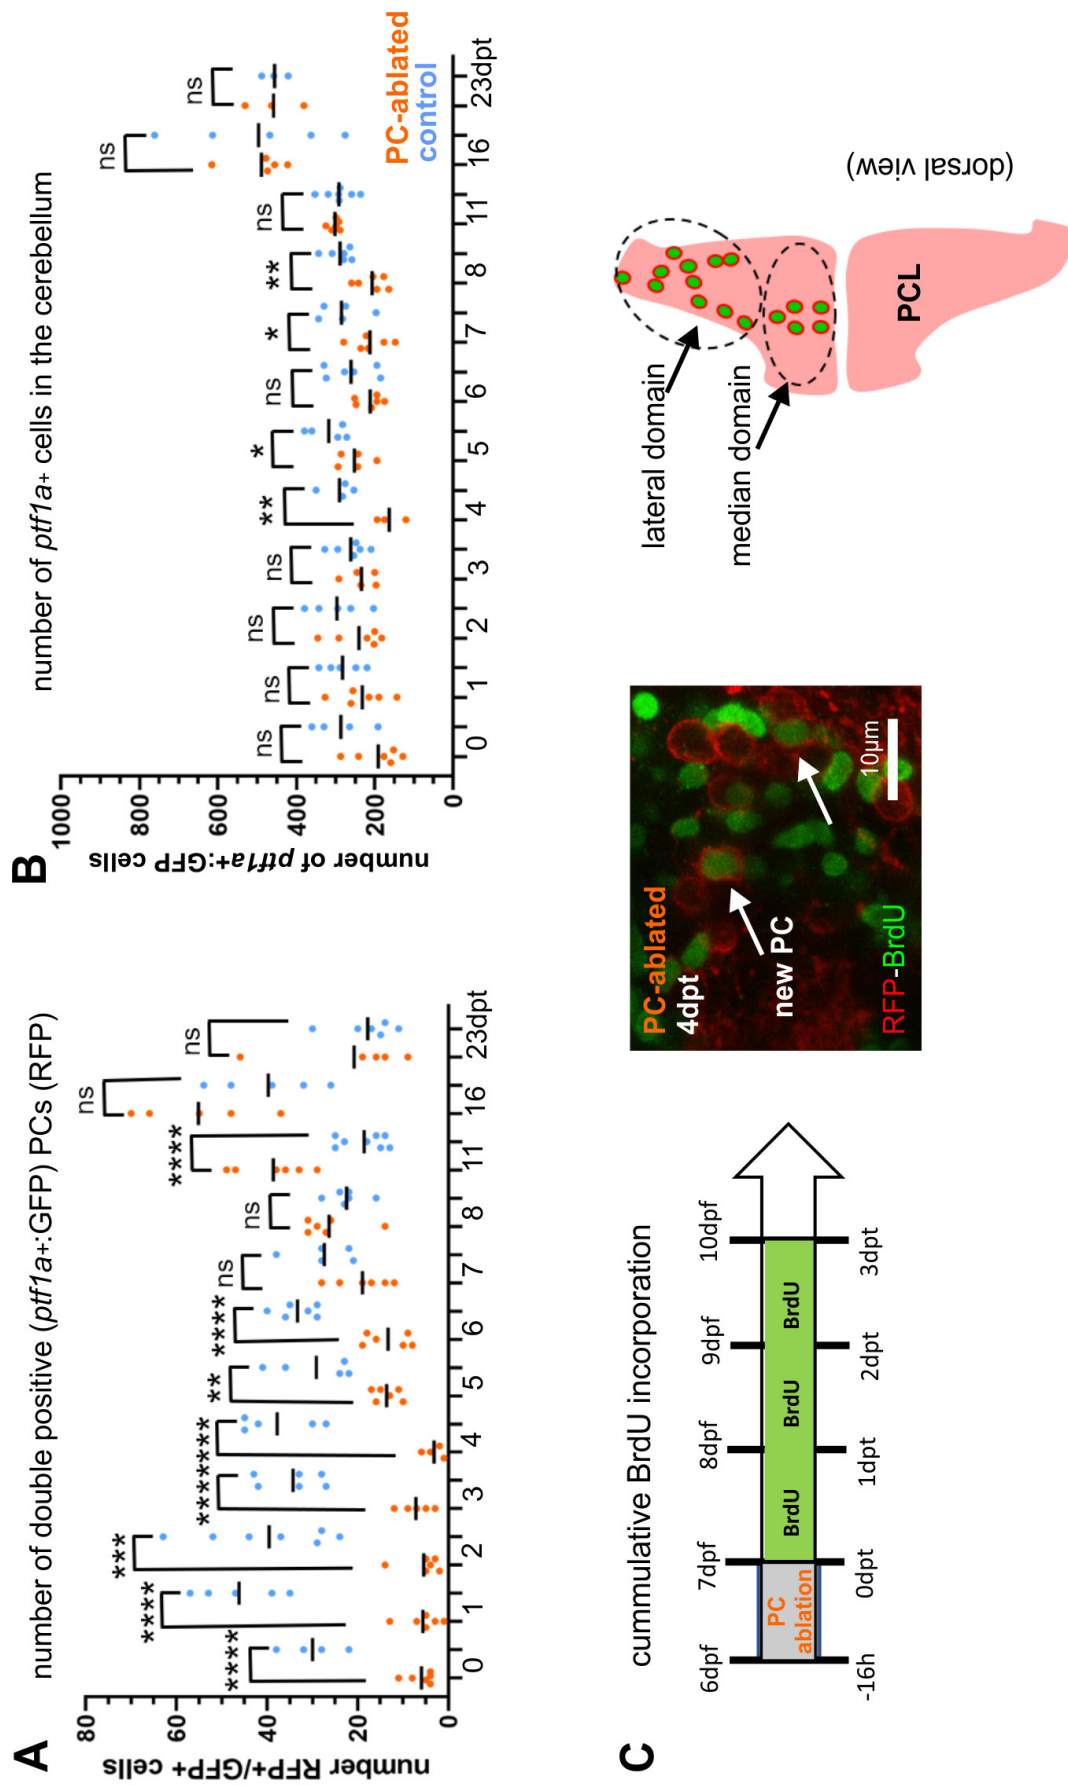

Supplement: supp [file elife-79672-supp-v1.zip]

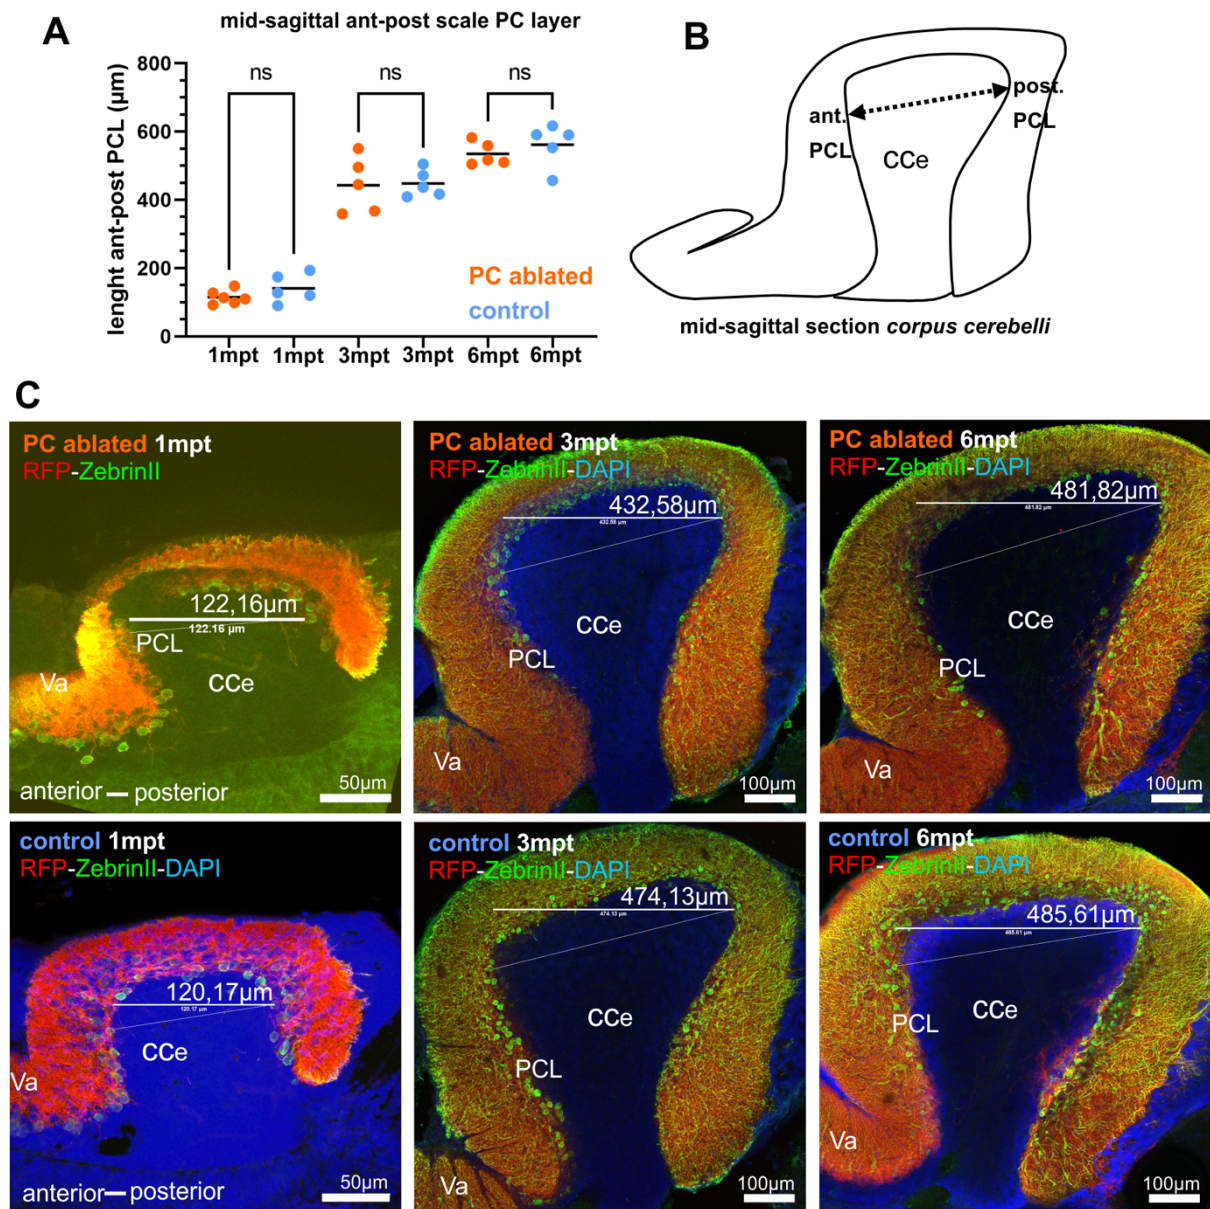

Figure 1-figure supplement 1

Supplement: supp [file elife-79672-supp-v1.zip]

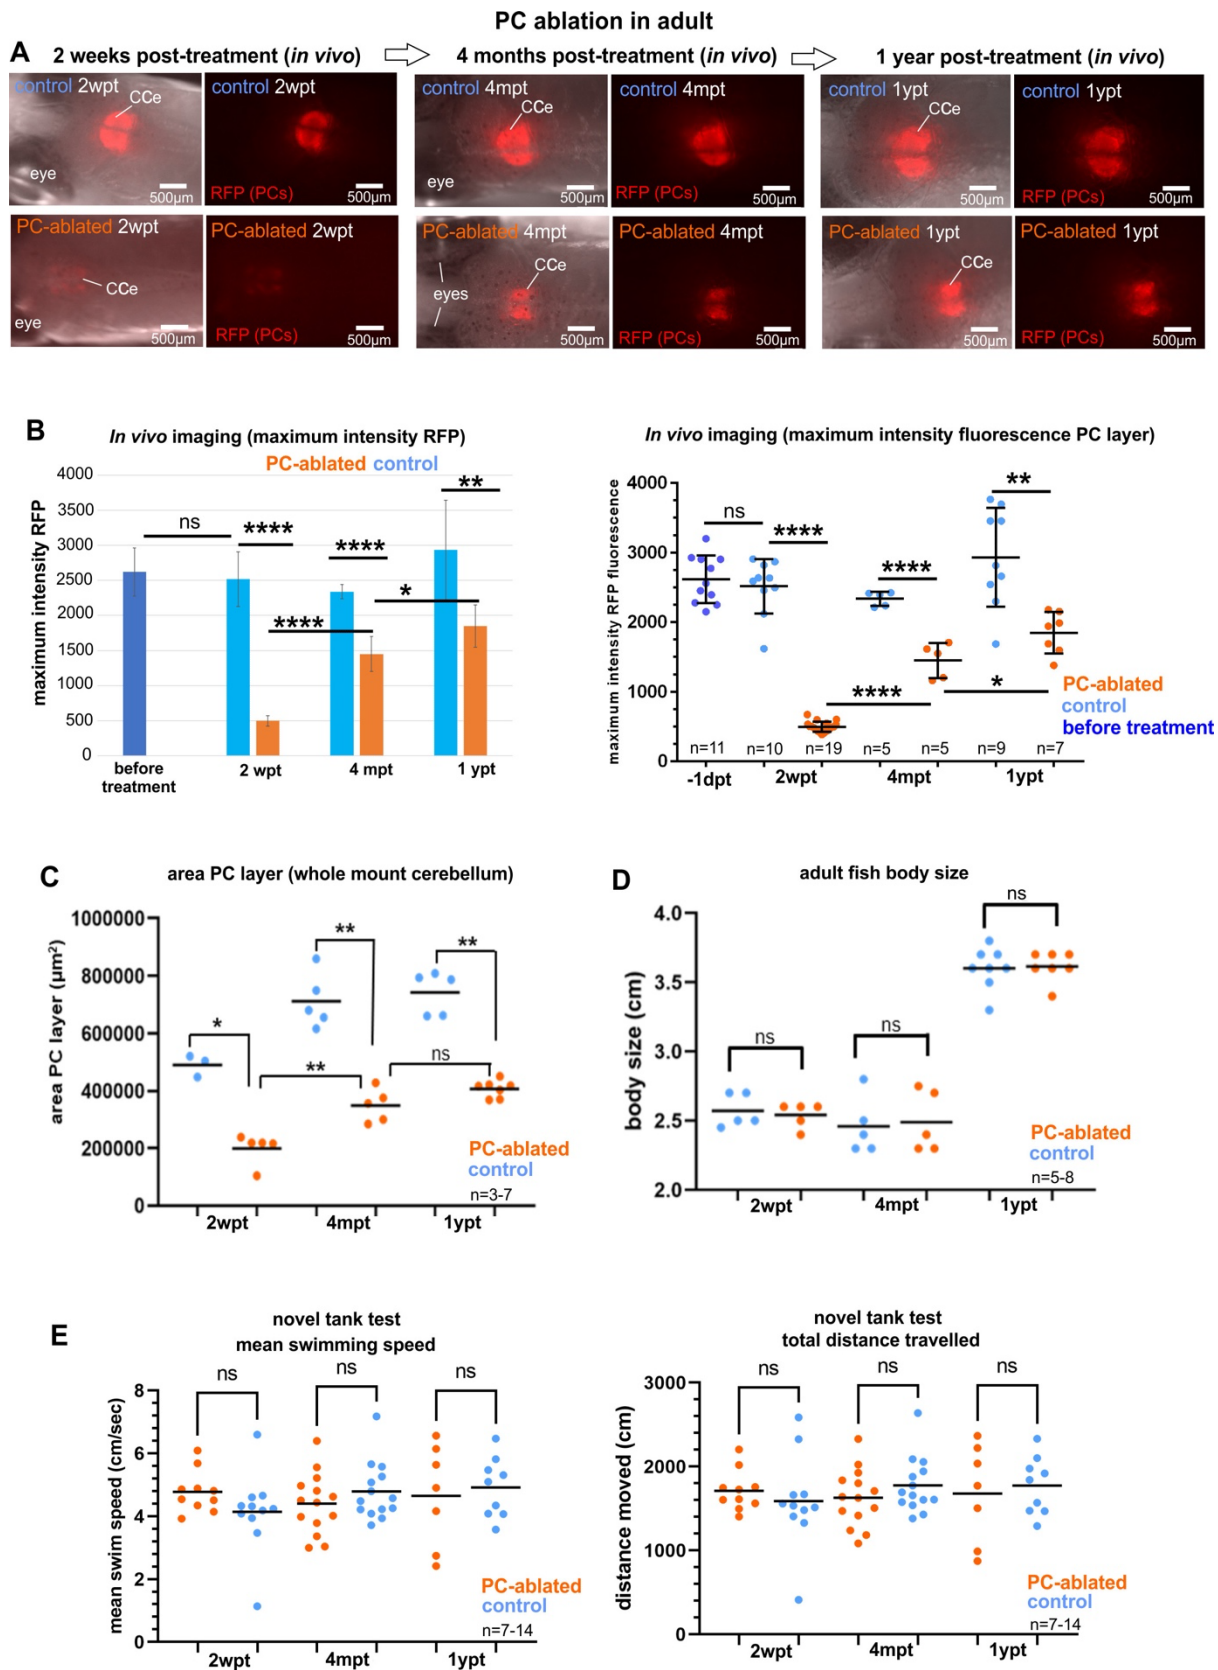

**Figure 6-figure supplement 1**

Supplement: supp [file elife-79672-supp-v1.zip]
